# Supplementary material for: Comparative Genomic Analysis of the Human Pathogen Wohlfahrtiimonas Chitiniclastica Provides Insight Into the Identification of Antimicrobial Resistance Genotypes and Potential Virulence Traits
Source: Front Cell Infect Microbiol. 2022 Jul 7;12:912427. doi: 10.3389/fcimb.2022.912427 (PMC9301364; doi:10.3389/fcimb.2022.912427)
Supplement: Supplementary file 1 [file Table_1.xlsx]

## Sheet: S1
Table S1: Additional information regarding the W. chitiniclastica genomes analyzed in this study.
Strain	Year of isolation	dDDH results	Cas cluster	Repeat consensus /cas genes	16s rRNA gene copy number	16S rRNA BLAST result	Blast results for additional 16S rRNA gene copies	rpoB BLAST results
DSM 100374	2013	W. chitiniclastica (74.8%)	CAS-TypeIF	Cas1, Cas3-Cas2,Csy1, Csy2, Csy3, Cas6	1	W. chitiniclastica (99.8%)		W. chitiniclastica (98.5%)
DSM 100375	2013	W. chitiniclastica (74.3%)	CAS-TypeIF	Cas1, Cas3-Cas2,Csy1, Csy2, Csy3, Cas6	1	W. chitiniclastica (99.8%)		W. chitiniclastica (98.4%)
DSM 100676	2015	W. chitiniclastica (74.6%)	CAS-TypeIF	Cas1, Cas3-Cas2,Csy1, Csy2, Csy3, Cas6	1	W. chitiniclastica (99.8%)		W. chitiniclastica (98.9%)
DSM 100917	2015	W. chitiniclastica (74.6%)	CAS-TypeIF	Cas1, Cas3-Cas2,Csy1, Csy2, Csy3, Cas6	1	W. chitiniclastica (99.8%)		W. chitiniclastica (98.2%)
DSM 105708	2016	W. chitiniclastica (74.1%)	CAS-TypeIF	Cas1, Cas3-Cas2,Csy1, Csy2, Csy3, Cas6	1	W. chitiniclastica (99.8%)		W. chitiniclastica (98.8%)
DSM 105712	2016	W. chitiniclastica (75.0%)	CAS-TypeIF	Cas1, Cas3-Cas2,Csy1, Csy2, Csy3, Cas6	1	W. chitiniclastica (99.8%)		W. chitiniclastica (98.8%)
DSM 105838	2017	W. chitiniclastica (75.1%)	CAS-TypeIF	Cas1, Cas3-Cas2,Csy1, Csy2, Csy3, Cas6	1	W. chitiniclastica (99.8%)		W. chitiniclastica (98.9%)
DSM 105839	2017	W. chitiniclastica (75.0%)	CAS-TypeIF	Cas1, Cas3-Cas2,Csy1, Csy2, Csy3, Cas6	1	W. chitiniclastica (99.8%)		W. chitiniclastica (98.4%)
DSM 105984	2017	W. chitiniclastica (75.0%)	CAS-TypeIF	Cas1, Cas3-Cas2,Csy1, Csy2, Csy3, Cas6	1	W. chitiniclastica (99.8%)		W. chitiniclastica (98.4%)
DSM 106597	2017	W. chitiniclastica (75.0%)	CAS-TypeIF	Cas1, Cas3-Cas2,Csy1, Csy2, Csy3, Cas6	1	W. chitiniclastica (99.8%)		W. chitiniclastica (98.4%)
DSM 108045	2019	W. chitiniclastica (75.1%)	CAS-TypeIF	Cas1, Cas3-Cas2,Csy1, Csy2, Csy3, Cas6	1	W. chitiniclastica (99.8%)		W. chitiniclastica (98.4%)
DSM 108048	2018	W. chitiniclastica (74.9%)	CAS-TypeIF	Cas1, Cas3-Cas2,Csy1, Csy2, Csy3, Cas6	1	W. chitiniclastica (99.8%)		W. chitiniclastica (98.7%)
DSM 110179	2017	W. chitiniclastica (75.0%)	CAS-TypeIF	Cas1, Cas3-Cas2,Csy1, Csy2, Csy3, Cas6	1	W. chitiniclastica (99.8%)		W. chitiniclastica (98.4%)
DSM 110473	2019	W. chitiniclastica (74.0%)	CAS-TypeIF	Cas1, Cas3-Cas2,Csy1, Csy2, Csy3, Cas6	1	W. chitiniclastica (99.8%)		W. chitiniclastica (98.6%)
DSM 18708T	2008	W. chitiniclastica (100.0%)	CAS-TypeIF	Cas1, Cas3-Cas2,Csy1, Csy2, Csy3, Cas6	1	W. chitiniclastica (100.0%)		W. chitiniclastica (98.2%)
SH04	2013	W. chitiniclastica (75.4%)	CAS-TypeIF	Cas1, Cas3-Cas2,Csy1, Csy2, Csy3, Cas6	1	W. chitiniclastica (99.9%)		W. chitiniclastica (98.3%)
BM-Y	2016	W. chitiniclastica (74.2%)	CAS-TypeIF	Cas1, Cas3-Cas2,Csy1, Csy2, Csy3, Cas6	4	W. chitiniclastica (99.9%)	W. chitiniclastica (99.9%), W. chitiniclastica (99.9%), W. chitiniclastica (99.9%)	W. chitiniclastica (98.7%)
Strain 20	2019	W. chitiniclastica (75.0%)	CAS-TypeIF	Cas1, Cas3, Cas6	2	W. chitiniclastica (99.8%)	W. chitiniclastica (99.7%)	W. chitiniclastica (98.9%)
ATCC 51249	2017	W. chitiniclastica (74.5%)	CAS-TypeIF	Cas1, Cas3-Cas2,Csy1, Csy2, Csy3, Cas6	1	W. chitiniclastica (99.9%)		W. chitiniclastica (99.0%)
F6512	2017	W. chitiniclastica (74.3%)	CAS-TypeIF	Cas1, Cas3-Cas2,Csy1, Csy2, Csy3, Cas6	1	W. chitiniclastica (99.8%)		W. chitiniclastica (98.8%)
F6513	2017	W. chitiniclastica (74.8%)	CAS-TypeIF	Cas1, Cas3-Cas2,Csy1, Csy2, Csy3, Cas6	1	W. chitiniclastica (99.8%)		W. chitiniclastica (98.3%)
F6514	2017	W. chitiniclastica (74.8%)	CAS-TypeIF	Cas1, Cas3-Cas2,Csy1, Csy2, Csy3, Cas6	1	W. chitiniclastica (99.8%)		W. chitiniclastica (98.3%)
F6515	2017	W. chitiniclastica (75.0%)	CAS-TypeIF	Cas1, Cas3, Cas6	1	W. chitiniclastica (99.8%)		W. chitiniclastica (98.3%)
F6516	2017	W. chitiniclastica (74.9%)	CAS-TypeIF	Cas1, Cas3-Cas2,Csy1, Csy2, Csy3, Cas6	1	W. chitiniclastica (99.9%)		W. chitiniclastica (98.8%)
F9188	2017	W. chitiniclastica (74.9%)	CAS-TypeIF	Cas1, Cas3-Cas2,Csy1, Csy2, Csy3, Cas6	1	W. chitiniclastica (99.9%)		W. chitiniclastica (98.2%)
G9145	2017	W. chitiniclastica (75.2%)	CAS-TypeIF	Cas1, Cas3, Cas6	1	W. chitiniclastica (99.9%)		W. chitiniclastica (98.3%)
