# Supplementary material for: Comparative Genomic Analysis of the Human Pathogen Wohlfahrtiimonas Chitiniclastica Provides Insight Into the Identification of Antimicrobial Resistance Genotypes and Potential Virulence Traits
Source: Front Cell Infect Microbiol. 2022 Jul 7;12:912427. doi: 10.3389/fcimb.2022.912427 (PMC9301364; doi:10.3389/fcimb.2022.912427)
Supplement: Supplementary file 2 [file Table_2.xlsx]

## Sheet: S3
Table S2: Detailed analysis regarding the bacteriophage profile of the W. chitiniclastica genomes analyzed in this study.
Strain	Region Length	Completeness	Score	# Total Proteins	Region Position	Most Common Phage	GC %
DSM 100374	14.2 kb	incomplete	20	19	1558-15769	Erwinia phage phiEt88	40.61%
	31.9 kb	intact	150	44	19359-51273	Mannheimia phage vB_MhM_1127AP1	39.01%
	22.3 kb	intact	130	28	146583-168906	Mannheimia phage vB_MhS_1152AP2	37.25%
	16.3 kb	incomplete	20	27	2895-19201	Pseudomonas phage YMC11/02/R656	35.97%
DSM 100375	8.3 kb	incomplete	30	17	175482-183856	Acinetobacter phage YMC11/11/R3177	35.81%
DSM 100676	7 kb	incomplete	10	9	97342-104360	Caulobacter phage Cr30	46.25%
	8 kb	incomplete	30	9	663-8669	Erwinia phage vB_EhrS_49	32.72%
	11.3 kb	incomplete	10	11	39481-50787	Nodularia phage vB_NspS-kac65v151	44.29%
DSM 100917	5 kb	incomplete	40	12	3-5063	Escherichia phage RCS47	33.37%
	11.3 kb	incomplete	10	11	234976-246282	Nodularia phage vB_NspS-kac65v151	44.29%
	21.2 kb	incomplete	30	10	188-21474	Synechococcus phage S-CAM3 isolate 1010CC42	32.53%
	7 kb	incomplete	10	9	91591-98609	Tsukamurella phage TIN2	40.25%
DSM 105708	26.5 kb	incomplete	40	15	50951-77494	Acinetobacter phage KARL-1	44.74%
	25.2 kb	intact	140	31	216-25441	Enterobacteria phage mEp235	37.20%
	34.5 kb	intact	150	48	17961-52537	Mannheimia phage vB_MhS_1152AP2	36.76%
	8.5 kb	incomplete	40	16	3624-12156	Paenibacillus phage Tripp	32.67%
DSM 105712	10.1 kb	incomplete	40	14	1-10195	Escherichia phage RCS47	35.12%
	11.3 kb	incomplete	10	11	18126-29515	Pseudomonas phage YMC11/02/R656	44.08%
	7 kb	incomplete	10	9	110962-117977	Staphylococcus phage SA11	46.58%
DSM 105838	26.5 kb	incomplete	40	15	48063-74605	Bacteriophage Lily	44.55%
	37.6 kb	intact	140	38	9228-46913	Enterobacteria phage mEp235	36.63%
	15.4 kb	incomplete	30	14	36854-52303	Erwinia phage phiEt88	36.21%
	13.8 kb	incomplete	60	15	125-13940	Escherichia phage RCS47	34.30%
	19.9 kb	incomplete	30	14	728-20630	Escherichia phage RCS47	34.31%
DSM 105839	25.5 kb	intact	130	36	519786-545368	Mannheimia phage vB_MhS_1152AP2	36.85%
	25.3 kb	incomplete	50	46	550004-575305	Pseudomonas phage PS-1 DNA	36.82%
	19.3 kb	incomplete	30	29	577124-596460	Salmonella phage SEN8	41.46%
DSM 105984	25.3 kb	incomplete	50	46	557462-582763	Acinetobacter phage vB_AbaS_TRS1	36.82%
	25.5 kb	intact	130	36	527244-552826	Mannheimia phage vB_MhS_1152AP2	36.85%
	19.3 kb	incomplete	30	29	584582-603918	Salmonella phage SEN8	41.46%
DSM 106597	25.3 kb	incomplete	50	46	550004-575305	Acinetobacter phage vB_AbaS_TRS1	36.82%
	25.5 kb	intact	130	36	519786-545368	Mannheimia phage vB_MhS_1152AP2	36.85%
	19.3 kb	incomplete	30	29	577124-596460	Salmonella phage SEN8	41.46%
DSM 108045	17.1 kb	questionable	70	24	138564-155707	Enterobacteria phage mEp235	38.46%
	16.1 kb	incomplete	30	27	122039-138235	Erwinia phage phiEt88	36.19%
DSM 108048	39 kb	intact	150	40	425-39485	Mannheimia phage vB_MhS_1152AP2	36.46%
DSM 110179	25.5 kb	intact	130	37	176462-202044	Mannheimia phage vB_MhS_1152AP2	36.85%
	24.5 kb	incomplete	50	46	147311-171826	Pseudomonas phage YMC11/02/R656	37.01%
	19.3 kb	incomplete	30	29	125370-144736	Salmonella phage SEN8	41.45%
DSM 110473	23.6 kb	intact	130	31	461-24078	Enterobacteria phage mEp235	38.36%
	11.5 kb	incomplete	30	25	285-11867	Enterobacteria phage SfV	36.82%
	18.3 kb	incomplete	40	27	25465-43838	Mannheimia phage vB_MhM_1127AP1	42.30%
DSM 18708T	28.3 kb	incomplete	40	36	533630-561988	Mannheimia phage vB_MhM_1127AP1	39.89%
SH04	11.4 kb	incomplete	30	14	122827-134315	Enterobacteria phage ST64T	37.44%
BM-Y	16.5 kb	incomplete	60	24	917-17510	Pseudomonas phage vB_PaeP_Tr60_Ab31	33.80%
	8.3 kb	incomplete	30	17	38238-46612	Acinetobacter phage YMC11/11/R3177	35.77%
	15 kb	incomplete	60	26	48082-63127	Pseudomonas phage PS-1 DNA	35.97%
	9.2 kb	incomplete	40	25	2114420-2123680	Enterobacteria phage SfV	37.67%
	22.6 kb	incomplete	30	20	974-23601	Escherichia phage RCS47	33.21%
	10.6 kb	questionable	70	19	24137-34791	Escherichia phage RCS48	35.95%
	20.9 kb	incomplete	30	17	34818-55813	Escherichia phage RCS49	33.78%
Strain 20	7.1 kb	incomplete	40	16	2016-9199	Vibrio phage VHML	33.53%
	19.1 kb	incomplete	20	29	67169-86347	Salmonella phage SEN8	41.94%
	16.9 kb	incomplete	50	18	145687-162639	Salmonella phage 118970_sal4	38.44%
ATCC 51249	39.9 kb	incomplete	40	38	457384-497366	Salmonella phage SEN8	41.44%
	39.6 kb	intact	150	59	766032-805701	Mannheimia phage vB_MhS_1152AP2	36.48%
F6512	17.4 kb	questionable	90	18	611410-628891	Phage Gifsy-2	36.64%
F6513	29.3 kb	incomplete	50	29	543641-572949	Mannheimia virus PHL101	39.29%
	25.9 kb	intact	140	34	835473-861383	Mannheimia phage vB_MhS_1152AP2	36.92%
	26.5 kb	incomplete	40	15	918698-945242	Acinetobacter phage Kimel	44.57%
F6514	20.3 kb	incomplete	40	15	149312-169620	Acinetobacter phage KARL-1	43.69%
	25.9 kb	intact	140	34	233473-259383	Mannheimia phage vB_MhS_1152AP2	36.92%
	21.4 kb	incomplete	50	29	529587-551024	Escherichia phage 500465-1	40.42%
F6515	26.5 kb	incomplete	40	15	420680-447224	Acinetobacter phage vB_AbaM_ME3	44.53%
F6516	39.6 kb	intact	150	60	1034-40732	Mannheimia phage vB_MhS_1152AP2	36.38%
	14.8 kb	questionable	80	23	10418-25306	Enterobacteria phage mEp235	39.40%
	14.2 kb	incomplete	20	19	28042-42253	Erwinia phage phiEt88	40.59%
	30.4 kb	incomplete	60	48	166717-197186	Mannheimia phage vB_MhM_587AP1	39.76%
	10.6 kb	incomplete	60	20	6158-16849	Halovirus HF1	33.10%
	15.3 kb	incomplete	30	22	295911-311225	Pseudomonas phage PS-1	36.11%
	24.1 kb	intact	120	32	312490-336686	Mannheimia phage vB_MhS_1152AP2	36.60%
F9188	64.3 kb	intact	140	86	306105-370414	Enterobacteria phage mEp235	38.68%
	4.9 kb	incomplete	10	9	467-5462	Escherichia phage RCS47	34.19%
G9145	20.3 kb	incomplete	40	15	147525-167833	Enterobacteria phage ES18	43.64%
	39.5 kb	intact	150	53	598469-637968	Enterobacteria phage mEp235	36.72%
