# Supplementary material for: Comparative Genomic Analysis of the Human Pathogen Wohlfahrtiimonas Chitiniclastica Provides Insight Into the Identification of Antimicrobial Resistance Genotypes and Potential Virulence Traits
Source: Front Cell Infect Microbiol. 2022 Jul 7;12:912427. doi: 10.3389/fcimb.2022.912427 (PMC9301364; doi:10.3389/fcimb.2022.912427)
Supplement: Supplementary file 3 [file Table_3.xlsx]

## Sheet: DSM 100374
#Classification	GCF	Position	NC ID	Start	End	Strand	Protein ID	aa Length	Acr/Aca	MGE/Prophage MetaData	Acr_Hit|pident	Sequence	Molecular Weight	Isoelectric Point	Self Target w/in 5000 BP	Self Target Outside 5000 BP
Medium Confidence	Undefined_Organism	146	NODE_1_length_364241_cov_202.946145	167480	168043	+	Protein(167480-168043)	188	AcrIIA15-0-WP_000600643.1|HTH_7|47.7|5.8e-06	-	-	MAKTYDERHAEIMDVSLRLFIQYGLKDTTVNDIVKAVNIAKGTFYHYFQSKEDLILELRAKYIRSYLSLTNDYMGQCKHSDWHGKIRAWCQGSIVHYYEHRAEHIALFQQQYYLDERREHLSVIIFLEEFLRTGNEVQAWHVASPDLVALLIYQGINLAFDECREKSFEELEGMTERLYDVFIKMVS*	22216.3	6.0214	None	Spacer Accession=NODE_6_length_167148_cov_222.136361|Spacer_Pos=78-109|CAS-TypeIF(3451-11787)|Target Accession=NODE_20_length_5624_cov_191.689742|Target_Pos=5577-5608
Medium Confidence	Undefined_Organism	147	NODE_1_length_364241_cov_202.946145	168057	168581	+	Protein(168057-168581)	175	Acr candidate	-	-	MRIIAALLMLGQLSISFAEPLTHEMKNFMRLAAAKNGDQYGFTKEDAQQYLGITWGKSPRRGTIYESTQHLTNDADQPTFEYSANRGTRILTLYFTEPVKSFVKAIERLRGFEAAWFPRQQANGLPTHYFEGKNPSEFIPTRKLWIRIYECADKPQTPCIRRAQLIFAKPGAVF*	19969	9.9344	None	Spacer Accession=NODE_6_length_167148_cov_222.136361|Spacer_Pos=78-109|CAS-TypeIF(3451-11787)|Target Accession=NODE_20_length_5624_cov_191.689742|Target_Pos=5577-5608
Medium Confidence	Undefined_Organism	161	NODE_5_length_169281_cov_194.357427	167462	167935	-	Protein(167462-167935)	158	AcrIIA7-2-WP_046340465.1|HTH_7|54.9|2.2e-41	PHAGE_Acinet_AbP2_NC_041998-gi|100056|ref|YP_009609909.1||4.12e-49	-	MAAENKVGRPTKYKHEYCELAFNYCLLGATDADLARFFDVSEQTINTWKHEYPEFLESIKKGKVDADALVAKSLFQRAIGYQYIETKNEMSEQGMKKSVTTKEAMPDTTAQIFWLKNRQPDKWRDKPVAVSEELDATPVKIVVNVQDARKQDDKPET*	18040.4	5.8442	None	Spacer Accession=NODE_6_length_167148_cov_222.136361|Spacer_Pos=78-109|CAS-TypeIF(3451-11787)|Target Accession=NODE_20_length_5624_cov_191.689742|Target_Pos=5577-5608
Medium Confidence	Undefined_Organism	162	NODE_5_length_169281_cov_194.357427	167945	168286	-	Protein(167945-168286)	114	Acr candidate	-	-	MDNKVNFETWLHNKTTVVAGFLGSALLSFAIWVFSQVYGQSVKHLESIDNKFDMLTKDIIAIKLQDSANTITINTLKNDVLDLKTVNKEVLGRLGSLEKSSAQHEQQLRQLSK*	12719.6	8.5946	None	Spacer Accession=NODE_6_length_167148_cov_222.136361|Spacer_Pos=78-109|CAS-TypeIF(3451-11787)|Target Accession=NODE_20_length_5624_cov_191.689742|Target_Pos=5577-5608

## Sheet: DSM 100375
#Classification	GCF	Position	NC ID	Start	End	Strand	Protein ID	aa Length	Acr/Aca	MGE/Prophage MetaData	Acr_Hit|pident	Sequence	Molecular Weight	Isoelectric Point	Self Target w/in 5000 BP	Self Target Outside 5000 BP
Low Confidence	Undefined_Organism	142	NODE_1_length_354106_cov_292.983366	159426	159989	+	Protein(159426-159989)	188	AcrIIA15-0-WP_000600643.1|HTH_7|47.7|5.4e-06	-	-	MAKTYDERHAEIMDVSLRLFIQYGLKDTTVNDIVKAVNIAKGTFYHYFQSKEDLILELRAKYIRSYLSLTNDYMGQCKHSDWHGKIRAWCQGSIVHYYEHRAEHIALFQQQYYLDERREHLSVIIFLEEFLRTGNEVQAWHVASPDLVALLIYQGINLAFDECREKSFEELEGMTERLYDVFIKMVS*	22216.3	6.0214	None	None
Low Confidence	Undefined_Organism	143	NODE_1_length_354106_cov_292.983366	160002	160526	+	Protein(160002-160526)	175	Acr candidate	-	-	MRIIAALLMLGQLSISFAEPLTHEMKNFMRLAAAKNGDQYGFTKEDAQQYLGITWGKSPRRGTIYESTQHLTNDADQPTFEYSANRGTRILTLYFTEPVKPFVKAIERLRGFEAAWFPRQQANGLPIHYFEGKNPSEFIPTRKLWIRIYECADKPQTPCIRRAQLIFAKPGAVF*	19991	9.9344	None	None
Low Confidence	Undefined_Organism	189	NODE_4_length_185493_cov_306.028185	180775	181095	+	Protein(180775-181095)	107	Acr candidate	-	-	MAESNFKSWLHNSTTAVAGFFGSALLSLAIWIFSQMYGQSVKHLESIDNKFDVLTKDIVAIKLQDSANNVRMSRIEDDVVYLKGNDKEHSKRLSELEKSSQYLMAC*	11991.7	6.7165	None	None
Low Confidence	Undefined_Organism	190	NODE_4_length_185493_cov_306.028185	181152	181304	+	Protein(181152-181304)	51	Acr candidate	-	-	MDPMKHTVIEDENGNPCDIQYHVKGCELPPEMTQVKDERQIYAIKKKLED*	5858.69	4.6815	None	None
Low Confidence	Undefined_Organism	191	NODE_4_length_185493_cov_306.028185	181368	181841	+	Protein(181368-181841)	158	AcrIIA7-2-WP_046340465.1|HTH_7|50.3|2e-36	PHAGE_Acinet_AbP2_NC_041998-gi|100056|ref|YP_009609909.1||3.40e-51	-	MTAKNKVGRPTKYKDEYCELAFNYCLLGATDVDLARFFNVDESTINRWKLEHEEFCESIKRGKIDADALVAKSLFQRAIGYQYIETKNEMSEQGMKKSVTTKEAMPDTTAQIFWLKNRQPDKWRDKPVAVSEELDATPVKIVVNVQDARKQDDKPET*	18130.6	5.9995	None	None
Low Confidence	Undefined_Organism	1	NODE_29_length_1026_cov_277.377239	135	278	+	Protein(135-278)	48	Acr candidate	PHAGE_Shigel_SfIV_NC_022749-gi|557307550|ref|YP_008766888.1||0.010	-	MTKREKYTAEFRAQAVKKVEENNSNISLTSRELGLPMQTLFNWCVMR*	5550.43	10.0175	None	None
Low Confidence	Undefined_Organism	2	NODE_29_length_1026_cov_277.377239	281	625	+	Protein(281-625)	115	AcrIIIB1-1-WP_110929174.1|HTH_21|38.0|9.9e-16	PROPHAGE_Escher_CFT073-gi|26249410|ref|NP_755450.1||4.99e-35	-	MAIRNQNPSKELIVHSDRGSQYCSNDYRSIIQKHGFCGSMSRKGNCYDNAPIESFWGTLKNELVYHKDYKTRGEAKADITQYIELEYNQTRIQKGLGWMSPRQLANLYYEHQAA*	13269.9	8.6397	None	None

## Sheet: DSM 100676
#Classification	GCF	Position	NC ID	Start	End	Strand	Protein ID	aa Length	Acr/Aca	MGE/Prophage MetaData	Acr_Hit|pident	Sequence	Molecular Weight	Isoelectric Point	Self Target w/in 5000 BP	Self Target Outside 5000 BP
Low Confidence	Undefined_Organism	263	NODE_1_length_510235_cov_142.592497	315714	316277	+	Protein(315714-316277)	188	AcrIIA15-0-WP_000600643.1|HTH_7|47.7|5e-06	-	-	MAKTYDERHAEIMDVSLRLFIQYGLKDTTVNDIVKAVNIAKGTFYHYFQSKEDLILELRAKYIRSYLSLTSDYMEQCKHSDWHGKIRAWCQGSIVHYYEHRAEHIALFQQQYYLDERREHLSVIIFLEEFLRTGNEVQAWHVASPDLVALLIYQGINLAFDECREKTFEELEGMTERLYDVFIKMVS*	22275.4	5.793	None	None
Low Confidence	Undefined_Organism	264	NODE_1_length_510235_cov_142.592497	316291	316815	+	Protein(316291-316815)	175	Acr candidate	-	-	MRIIAALLMLGQLSISFAEPLTHEMKNFMRLAAAKNGDQYGFTKEDAQQYLGITWGKSPRRGAIYESTQHLTNDADQPTFEYSANRGTRILTLYFTEPVKPFVKAIERLRGFEAAWFPRQQANGLPIHYFEGKNPSEFIPTRKLWIRIYECADKPQTPCIRRAQLIFAKPGAVF*	19961	9.9344	None	None
Low Confidence	Undefined_Organism	62	NODE_2_length_280640_cov_171.684670	75732	76052	+	Protein(75732-76052)	107	Rampelli_10002_NODE_590_length_11027_cov_2.771054_8|HTH_XRE|AcrIIA1|34.9|1.7e-08	PHAGE_Burkho_phiE202_NC_009234-gi|134288765|ref|YP_001111052.1||1.95e-18	-	MSDFPTRLKIVRENTGLSQATFGAMGGVLQQAQYKYEKGTRKPDIEYLMSLAEHGIDVQYLITGSVSSHQLSNIDNELISLFKKADPTIQKAIFKLLGHESENPNK*	11841.5	7.315	None	None
Low Confidence	Undefined_Organism	63	NODE_2_length_280640_cov_171.684670	76067	76357	+	Protein(76067-76357)	97	Acr candidate	-	-	MKNIENSEDKLQKKFEETLDRTAIKPLSITIGALSCLLIYLIFFTTLDKTDKLITGLILVGLSAYLFLMASKLKQQNQKSLQEYMQYKSTKKNQNR*	11094.1	10.0777	None	None
Low Confidence	Undefined_Organism	3	NODE_16_length_22136_cov_52.681173	2674	2793	-	Protein(2674-2793)	40	Acr candidate	-	-	MGKRSGNTYIYSIEQVAESLNTSKESIIETVKRFNTNKK*	4466.05	10.1573	None	None
Low Confidence	Undefined_Organism	4	NODE_16_length_22136_cov_52.681173	2820	3128	-	Protein(2820-3128)	103	AcrVA5-2-WP_087920907.1|HTH_Tnp_1|30.0|0.0011	PROPHAGE_Shewan_MR-1-gi|24373865|ref|NP_717908.1||1.57e-27	-	MSQKRTYRKHDEAFKKDAVNLVLEEGYSIAQAAKSLEISTGLLYKWKAEQIQEPILDSDENAELKRLRKENRELKMEKEILKKASAYPCYPLMENCYAINHY*	11999.8	7.8348	None	None
Low Confidence	Undefined_Organism	6	NODE_25_length_3004_cov_939.759481	2514	2771	+	Protein(2514-2771)	86	3300006916_____Ga0070750_10003819_14|HTH_17-0-AcrIIA1|48.1|0.0017	-	-	MSKVSVSEAAKLTGKSTKTIYRHIDTGKLSSSQSDNNSKSIDIIELQRVYGSLNLKKENVIDSQMSKNENQNDNQTRQSNKTTFR*	9566.61	10.3632	None	None
Low Confidence	Undefined_Organism	7	NODE_25_length_3004_cov_939.759481	2728	2823	+	Protein(2728-2823)	32	Acr candidate	-	-	MTIKQDNQTRQLLDEKEDHIASLKQAMLLIE*	3654.21	4.7333	None	None

## Sheet: DSM 100917
#Classification	GCF	Position	NC ID	Start	End	Strand	Protein ID	aa Length	Acr/Aca	MGE/Prophage MetaData	Acr_Hit|pident	Sequence	Molecular Weight	Isoelectric Point	Self Target w/in 5000 BP	Self Target Outside 5000 BP
Low Confidence	Undefined_Organism	263	NODE_1_length_693874_cov_260.026470	315714	316277	+	Protein(315714-316277)	188	AcrIIA15-0-WP_000600643.1|HTH_7|47.7|5.1e-06	-	-	MAKTYDERHAEIMDVSLRLFIQYGLKDTTVNDIVKAVNIAKGTFYHYFQSKEDLILELRAKYIRSYLSLTSDYMEQCKHSDWHGKIRAWCQGSIVHYYEHRAEHIALFQQQYYLDERREHLSVIIFLEEFLRTGNEVQAWHVASPDLVALLIYQGINLAFDECREKTFEELEGMTERLYDVFIKMVS*	22275.4	5.793	None	None
Low Confidence	Undefined_Organism	264	NODE_1_length_693874_cov_260.026470	316291	316815	+	Protein(316291-316815)	175	Acr candidate	-	-	MRIIAALLMLGQLSISFAEPLTHEMKNFMRLAAAKNGDQYGFTKEDAQQYLGITWGKSPRRGAIYESTQHLTNDADQPTFEYSANRGTRILTLYFTEPVKPFVKAIERLRGFEAAWFPRQQANGLPIHYFEGKNPSEFIPTRKLWIRIYECADKPQTPCIRRAQLIFAKPGAVF*	19961	9.9344	None	None
Low Confidence	Undefined_Organism	9	NODE_7_length_84971_cov_280.342486	8615	8905	-	Protein(8615-8905)	97	Acr candidate	-	-	MKNIENSEDKLQKKFEETLDRTAIKPLSITIGALSCLLIYLIFFTTLDKTDKLITGLILVGLSAYLFLMASKLKQQNQKSLQEYMQYKSTKKNQNR*	11094.1	10.0777	None	None
Low Confidence	Undefined_Organism	10	NODE_7_length_84971_cov_280.342486	8920	9240	-	Protein(8920-9240)	107	Rampelli_10002_NODE_590_length_11027_cov_2.771054_8|HTH_XRE|AcrIIA1|34.9|1.8e-08	PHAGE_Burkho_phiE202_NC_009234-gi|134288765|ref|YP_001111052.1||1.95e-18	-	MSDFPTRLKIVRENTGLSQATFGAMGGVLQQAQYKYEKGTRKPDIEYLMSLAEHGIDVQYLITGSVSSHQLSNIDNELISLFKKADPTIQKAIFKLLGHESENPNK*	11841.5	7.315	None	None
Low Confidence	Undefined_Organism	15	NODE_15_length_22136_cov_159.418605	19009	19317	+	Protein(19009-19317)	103	AcrVA5-2-WP_087920907.1|HTH_Tnp_1|30.0|0.0011	PROPHAGE_Shewan_MR-1-gi|24373865|ref|NP_717908.1||1.57e-27	-	MSQKRTYRKHDEAFKKDAVNLVLEEGYSIAQAAKSLEISTGLLYKWKAEQIQEPILDSDENAELKRLRKENRELKMEKEILKKASAYPCYPLMENCYAINHY*	11999.8	7.8348	None	None
Low Confidence	Undefined_Organism	16	NODE_15_length_22136_cov_159.418605	19344	19463	+	Protein(19344-19463)	40	Acr candidate	-	-	MGKRSGNTYIYSIEQVAESLNTSKESIIETVKRFNTNKK*	4466.05	10.1573	None	None
Low Confidence	Undefined_Organism	2	NODE_22_length_3073_cov_2535.036048	251	346	-	Protein(251-346)	32	Acr candidate	-	-	MTIKQDNQTRQLLDEKEDHIASLKQAMLLIE*	3654.21	4.7333	None	None
Low Confidence	Undefined_Organism	3	NODE_22_length_3073_cov_2535.036048	303	560	-	Protein(303-560)	86	3300006916_____Ga0070750_10003819_14|HTH_17-0-AcrIIA1|48.1|0.0017	-	-	MSKVSVSEAAKLTGKSTKTIYRHIDTGKLSSSQSDNNSKSIDIIELQRVYGSLNLKKENVIDSQMSKNENQNDNQTRQSNKTTFR*	9566.61	10.3632	None	None

## Sheet: DSM 105708
#Classification	GCF	Position	NC ID	Start	End	Strand	Protein ID	aa Length	Acr/Aca	MGE/Prophage MetaData	Acr_Hit|pident	Sequence	Molecular Weight	Isoelectric Point	Self Target w/in 5000 BP	Self Target Outside 5000 BP
Low Confidence	Undefined_Organism	179	NODE_1_length_361656_cov_243.498060	194440	194964	-	Protein(194440-194964)	175	Acr candidate	-	-	MRIIAALLMLGQLSMSFAEPLTHEMKNFMRLAAAKNGDQYGFTKEDAQQYLGITWGKSPRRGAIYESTQHLTNDADQPTFEYSANRGTRILTLYFTEPVKPFVKAIERLRGFEAAWFPRQQANGLPIHYFEGKNPSEFIPTRKLWIRIYECADKPQTPCIRRAQLIFAKPGAVF*	19979	9.9344	None	None
Low Confidence	Undefined_Organism	180	NODE_1_length_361656_cov_243.498060	194978	195541	-	Protein(194978-195541)	188	AcrIIA15-0-WP_000600643.1|HTH_7|47.7|5.8e-06	-	-	MAKTYDERHAEIMDVSLRLFIQYGLKDTTVNDIVKAVNIAKGTFYHYFQSKEDLILELRAKYIRSYLSLTNDYMGQCKHSDWHGKIRAWCQGSIVHYYEHRAEHIALFQQQYYLDERREHLSVIIFLEEFLRTGNEVQAWHVASPDLVALLIYQGINLAFDECREKSFEELEGMTERLYDVFIKMVS*	22216.3	6.0214	None	None
Low Confidence	Undefined_Organism	37	NODE_5_length_190199_cov_188.826717	41863	42336	-	Protein(41863-42336)	158	AcrIIA7-2-WP_046340465.1|HTH_7|51.0|3.3e-37	PHAGE_Acinet_AbP2_NC_041998-gi|100056|ref|YP_009609909.1||2.03e-51	-	MAAENKVGRPTKYKHEYCELAFNYCLLGATDADLARFFNVDESTINRWKLEHEEFCESVKKGKLDADALVAKSLFQRAIGYQYIETKNEMSEQGMKKTVTTKEAMPDTTAQIFWLKNRQPNKWRDKPVAVSEELDATPVKIVVNVQDARKQDDKPET*	18066.5	6.4786	None	None
Low Confidence	Undefined_Organism	38	NODE_5_length_190199_cov_188.826717	42346	42687	-	Protein(42346-42687)	114	Acr candidate	-	-	MDNKVNFETWLHNKTTVVAGFLGSALLSFAIWVFSQVYGQSVKHLESIDNKFDMLTKDIIAIKLQDSANTITINTLKNDVLDLKTVNKEVLGRLGSLEKSSAQHEQQLRQLSK*	12719.6	8.5946	None	None
Low Confidence	Undefined_Organism	52	NODE_5_length_190199_cov_188.826717	51215	51493	-	Protein(51215-51493)	93	Acr candidate	-	-	MATNLDYIWLHLFNGNRLSDRQAMVQFAYGAFRSRVSEKRYEYHIQDEFVTIHPQGSVVRYKEYWICPKFLRTKQAQRIREELMKKTHGRRS*	11226.9	10.4362	None	None
Low Confidence	Undefined_Organism	53	NODE_5_length_190199_cov_188.826717	51500	51736	-	Protein(51500-51736)	79	WP_031577006.1|HTH_3-1-AcrIIA1|34.4|9.4e-05	PHAGE_Pseudo_vB_PaeP_Tr60_Ab31_NC_023575-gi|589286923|ref|YP_009007118.1||4.06e-04	-	MSDMIDLIIKKAGGATELARKLDITRPAVLHWKARGYKVPPIKHAFKIENITGIPKEEIWTDYFNSKPQNITNDGLEG*	8805.22	9.5955	None	None
Low Confidence	Undefined_Organism	10	NODE_6_length_169871_cov_266.957395	4885	5088	+	Protein(4885-5088)	68	Acr candidate	-	-	MKYLIIPALTAIAFHFAFDDALLKDIQTGKKLLICNGKHVAPEMVTGFSDGIWWFRNGYAKNCEVKL*	7573.96	8.517	None	None
Low Confidence	Undefined_Organism	11	NODE_6_length_169871_cov_266.957395	5116	5565	+	Protein(5116-5565)	150	Acr candidate	-	-	MIFEKRLRHQYEWTVGKERSFLNKPTRDFKKDLKKMPLLAPVLEISKNVLSLDDEKKRRILAHIEYDQKLRDRHAKRWRAARRIYFSLSEDLKQEIMKKWNAKIYPLTSVNFAHLVDVVSGNQAKRLAEISAKEQQAKLLKQSQIELFA*	17776.8	10.756	None	None
Low Confidence	Undefined_Organism	12	NODE_6_length_169871_cov_266.957395	5587	5868	+	Protein(5587-5868)	94	AcrIIA13-0-WP_006662529.1|HTH_17|36.5|1.1e-11	PHAGE_Entero_P4_NC_001609-gi|9627517|ref|NP_042041.1||1.51e-06	-	MTTIQVQLDPHSSKRIENIEAMVQNIIYQLNSEDEPLETDRFLRISDVSNIIGFNKKWIYEAIQKGRFPAPIKFGTSSRWRLSDIKKWVDSQK*	10939.5	9.6236	None	None

## Sheet: DSM 105712
#Classification	GCF	Position	NC ID	Start	End	Strand	Protein ID	aa Length	Acr/Aca	MGE/Prophage MetaData	Acr_Hit|pident	Sequence	Molecular Weight	Isoelectric Point	Self Target w/in 5000 BP	Self Target Outside 5000 BP
Medium Confidence	Undefined_Organism	182	NODE_1_length_381332_cov_182.620892	197216	197743	-	Protein(197216-197743)	176	Acr candidate	-	-	MRIIAALLMLGQLSMSFAEPLTHEMKNFMRLAAAKNGDQYGFTKEDAQQYLGITWGKSPRRGAIYESTEHLAKVPDQSTFEYSANRGTRILTLYFTEPVKPFIKAIERLHGFEAAWFPRQQANGLPIHYFEGKNPSEFIPTRKLWIRIYECADKPQTPCIRRAQLIFAKPGAVFQ*	20087.2	9.9172	None	Spacer Accession=NODE_4_length_216921_cov_216.413053|Spacer_Pos=736-767|CAS-TypeIF(2671-10974)|Target Accession=NODE_2_length_255223_cov_213.592637|Target_Pos=67933-67964,Spacer Accession=NODE_4_length_216921_cov_216.413053|Spacer_Pos=1519-1550|CAS-TypeIF(2671-10974)|Target Accession=NODE_110_length_79_cov_338.000000|Target_Pos=17-48,Spacer Accession=NODE_4_length_216921_cov_216.413053|Spacer_Pos…
Medium Confidence	Undefined_Organism	183	NODE_1_length_381332_cov_182.620892	197762	198325	-	Protein(197762-198325)	188	AcrIIA15-0-WP_000600643.1|HTH_7|47.7|4.9e-06	-	-	MAKTYDERHAEIMDVSLRLFIQYGLKDTTVNDIVKAVNIAKGTFYHYFQSKEDLILELRAKYIRSYLSLTNDYMGQCKHSDWHGKIRAWCQGSIVHYYEHRAEHIALFQQQYYLDERREHLSVIIFLEEFLRTGNEVQAWHVASPDLVALLIYQGINLAFDECREKSFEELEGMTERLYDVFIKMVS*	22216.3	6.0214	None	Spacer Accession=NODE_4_length_216921_cov_216.413053|Spacer_Pos=736-767|CAS-TypeIF(2671-10974)|Target Accession=NODE_2_length_255223_cov_213.592637|Target_Pos=67933-67964,Spacer Accession=NODE_4_length_216921_cov_216.413053|Spacer_Pos=1519-1550|CAS-TypeIF(2671-10974)|Target Accession=NODE_110_length_79_cov_338.000000|Target_Pos=17-48,Spacer Accession=NODE_4_length_216921_cov_216.413053|Spacer_Pos…

## Sheet: DSM 105838
#Classification	GCF	Position	NC ID	Start	End	Strand	Protein ID	aa Length	Acr/Aca	MGE/Prophage MetaData	Acr_Hit|pident	Sequence	Molecular Weight	Isoelectric Point	Self Target w/in 5000 BP	Self Target Outside 5000 BP
Medium Confidence	Undefined_Organism	243	NODE_1_length_491126_cov_74.475509	290508	291071	+	Protein(290508-291071)	188	AcrIIA15-0-WP_000600643.1|HTH_7|47.7|5.2e-06	-	-	MAKTYDERHAEIMDVSLRLFIQYGLKDTTVNDIVKAVNIAKGTFYHYFQSKEDLILELRAKYIRSYLSLTNDYMGQCKHSDWHGKIRAWCQGSIVHYYDHRAEHIALFQQQYYLDERREHLSVIIFLEEFLRTGNEVQAWHVASPDLVALLIYQGINLAFDECREKSFEELEGMTERLYDVFIKMVS*	22202.3	6.0204	None	Spacer Accession=NODE_6_length_171961_cov_76.418119|Spacer_Pos=498-529|CAS-TypeIF(2909-11245)|Target Accession=NODE_2_length_257466_cov_79.011722|Target_Pos=5573-5542
Medium Confidence	Undefined_Organism	244	NODE_1_length_491126_cov_74.475509	291085	291609	+	Protein(291085-291609)	175	Acr candidate	-	-	MRIIAALLMLGQLSMSFAEPLTHEMKNFMRLAAAKNGDQYGFTKEDAQQYLGITWGKSPRRGAIYKSTQHLTNDADQPTFEYSANRGTRILTLYFTEPVKPFVKAIERLRGFEAAWFPRQQANGLPIHYFEGKNPSEFIPTRKLWIRIYECADKRQTPCIRRAQLIFAKSGAVF*	20027.1	10.3012	None	Spacer Accession=NODE_6_length_171961_cov_76.418119|Spacer_Pos=498-529|CAS-TypeIF(2909-11245)|Target Accession=NODE_2_length_257466_cov_79.011722|Target_Pos=5573-5542
Medium Confidence	Undefined_Organism	6	NODE_4_length_227097_cov_83.893327	7489	7932	-	Protein(7489-7932)	148	Acr candidate	-	-	MSYAKKQAYKKSKLKAQEEINGAKFSMFRHDVFNSKEYYSLSPIAVKLLVDAMAIYNRLNNGDLSFAFSIMKDRGWNSETTLRKAIKELLDANFLILSRQGGRNNRPNLYALSFYKINDCLNKDGFSKIDIKPTKKAPDDWKKVIKN*	16968.6	10.4231	None	Spacer Accession=NODE_6_length_171961_cov_76.418119|Spacer_Pos=498-529|CAS-TypeIF(2909-11245)|Target Accession=NODE_2_length_257466_cov_79.011722|Target_Pos=5573-5542
Medium Confidence	Undefined_Organism	7	NODE_4_length_227097_cov_83.893327	8019	8333	-	Protein(8019-8333)	105	Acr candidate	-	-	MTKKSLTNKLVYMLDILSHTSLNKLEAPRYGDTCINTTKSDLEAKGCKFDHIDEMIPNRFGSESKFRRYYLIFIPEHLQKELDEYRKEKSAQPSKVKAPHSGTK*	12080.9	9.6276	None	Spacer Accession=NODE_6_length_171961_cov_76.418119|Spacer_Pos=498-529|CAS-TypeIF(2909-11245)|Target Accession=NODE_2_length_257466_cov_79.011722|Target_Pos=5573-5542
Medium Confidence	Undefined_Organism	8	NODE_4_length_227097_cov_83.893327	8330	8770	-	Protein(8330-8770)	147	Acr candidate	-	-	MPIQNLNKAQDQARRNTTEDMIEALQDVYTSQIIEFITDARRDNIRTWLNEEDTFHGNEWLLDSVITAMSNDVNLFLVAKAEHIPIGTFLTAKENCLYQLQEMKLDLITLLSLKHAINEQIINMTKEMISITNSIKNYDQSGGGLI*	16729	4.4185	None	Spacer Accession=NODE_6_length_171961_cov_76.418119|Spacer_Pos=498-529|CAS-TypeIF(2909-11245)|Target Accession=NODE_2_length_257466_cov_79.011722|Target_Pos=5573-5542
Medium Confidence	Undefined_Organism	9	NODE_4_length_227097_cov_83.893327	8773	8979	-	Protein(8773-8979)	69	AcrIIA13-0-WP_006662529.1|HTH_17|43.4|3e-10	PHAGE_Entero_P4_NC_001609-gi|9627517|ref|NP_042041.1||7.03e-11	-	MYTDKQFIRLNQVINLTGLSRASIYNYIQESRFPKPAKFGKNSLWEYSEIQTWINDRLTERDTAQGGI*	8016.04	9.5057	None	Spacer Accession=NODE_6_length_171961_cov_76.418119|Spacer_Pos=498-529|CAS-TypeIF(2909-11245)|Target Accession=NODE_2_length_257466_cov_79.011722|Target_Pos=5573-5542
Medium Confidence	Undefined_Organism	3	NODE_12_length_45634_cov_83.077332	6643	7140	+	Protein(6643-7140)	166	Acr candidate	-	-	MNQGKIKFHNKNFLSCIVIWLIFGFTVGTLLSLWVDSSFIKIISFVDPSLFKNTNRYYATMVCLVISSPFAFSYMYKHCLLEIILDGYFYYLFWLILIIGIFWNLGIIKLSVENSQDIYKSTILFRVIIYKFDWVGAVFVSFLGMYATVISGAVLLKYHQLKRKR*	19341.2	9.8448	None	Spacer Accession=NODE_6_length_171961_cov_76.418119|Spacer_Pos=498-529|CAS-TypeIF(2909-11245)|Target Accession=NODE_2_length_257466_cov_79.011722|Target_Pos=5573-5542
Medium Confidence	Undefined_Organism	4	NODE_12_length_45634_cov_83.077332	7145	7513	+	Protein(7145-7513)	123	Acr candidate	-	-	MSNENIDFDAVYQQYWTNIAGGLGLIINEINDSFSEANLAKRSKFIDQKITDNFSREMRKWSSKAQEISAKAAAANNPKAQATFARVAEEFLKGSSDIYDHASDVIGKADKFIVSYAEELRH*	13684.2	5.206	None	Spacer Accession=NODE_6_length_171961_cov_76.418119|Spacer_Pos=498-529|CAS-TypeIF(2909-11245)|Target Accession=NODE_2_length_257466_cov_79.011722|Target_Pos=5573-5542
Medium Confidence	Undefined_Organism	5	NODE_12_length_45634_cov_83.077332	7552	7845	+	Protein(7552-7845)	98	AcrIIA1-3-WP_115494754.1|HTH_Tnp_ISL3|35.9|0.00015	PROPHAGE_Xantho_33913-gi|21231087|ref|NP_637004.1||2.65e-12	-	MTKREKYTAEFRAQAVKKVEEHNGNISLISRELGLPMQTLFNWCNKANKGQLIGTEQYDPDIMAILEENKQLKRALRIAEEEREILKKATAYFAKNS*	11243.9	9.4872	None	Spacer Accession=NODE_6_length_171961_cov_76.418119|Spacer_Pos=498-529|CAS-TypeIF(2909-11245)|Target Accession=NODE_2_length_257466_cov_79.011722|Target_Pos=5573-5542

## Sheet: DSM 105839
#Classification	GCF	Position	NC ID	Start	End	Strand	Protein ID	aa Length	Acr/Aca	MGE/Prophage MetaData	Acr_Hit|pident	Sequence	Molecular Weight	Isoelectric Point	Self Target w/in 5000 BP	Self Target Outside 5000 BP
Medium Confidence	Undefined_Organism	179	NODE_1_length_626320_cov_168.576109	193557	194081	-	Protein(193557-194081)	175	Acr candidate	-	-	MRIIAALLMLGQLSISFAEPLTHEMKNFMRLAAAKNGDQYGFTKEDAQQYLGITWGKSPRRGAIYESTQHLTNDADQPTFEYSANRGTRILTLYFTEPVKPFVKAIERLRGFEAAWFPRQQANGLPIHYFEGKNPSEFIPTRKLWIRIYECADKPQTPCIRRAQLIFAKPGAVF*	19961	9.9344	None	Spacer Accession=NODE_5_length_169687_cov_170.486593|Spacer_Pos=169521-169552|CAS-TypeIF(159149-167380)|Target Accession=NODE_14_length_7414_cov_178.395802|Target_Pos=17-48
Medium Confidence	Undefined_Organism	180	NODE_1_length_626320_cov_168.576109	194095	194658	-	Protein(194095-194658)	188	AcrIIA15-0-WP_000600643.1|HTH_7|47.7|5.5e-06	-	-	MAKTYDERHAEIMDVSLRLFIQYGLKDTTVNDIVKAVNIAKGTFYHYFQSKEDLILELRAKYIRSYLSLTSDYMEQCKHSDWHGKIRAWCQGSIVHYYEHRAEHIALFQQQYYLDERREHLSVIIFLEEFLRTGNEVQAWHVASPDLVALLIYQGINLAFDECREKTFEELEGMTERLYDVFIKMVS*	22275.4	5.793	None	Spacer Accession=NODE_5_length_169687_cov_170.486593|Spacer_Pos=169521-169552|CAS-TypeIF(159149-167380)|Target Accession=NODE_14_length_7414_cov_178.395802|Target_Pos=17-48
Medium Confidence	Undefined_Organism	476	NODE_1_length_626320_cov_168.576109	541923	542396	-	Protein(541923-542396)	158	AcrIIA7-2-WP_046340465.1|HTH_7|54.9|2.7e-41	PHAGE_Acinet_AbP2_NC_041998-gi|100056|ref|YP_009609909.1||4.86e-49	-	MAAENKVGRPTKYKHEYCELAFNYCLLGATDADLARFFDVSEQTINTWKHEYPEFLESIKKGKVDADALVAKSLFQRAIGYQYIETKNEMSEQGMKKSVTTKEALPDTTAQIFWLKNRQPDKWRDKPVAVSEELDATPVKIVVNVQDARKQDDKPET*	18022.4	5.8442	None	Spacer Accession=NODE_5_length_169687_cov_170.486593|Spacer_Pos=169521-169552|CAS-TypeIF(159149-167380)|Target Accession=NODE_14_length_7414_cov_178.395802|Target_Pos=17-48
Medium Confidence	Undefined_Organism	477	NODE_1_length_626320_cov_168.576109	542406	542747	-	Protein(542406-542747)	114	Acr candidate	-	-	MDNKVNFETWLHNKTTVVAGFLGSALLSFAIWVFSQVYGQSVKHLESIDNKFDMLTKDIIAIKLQDSANTITINTLKNDVLDLKTVNKEVLGRLGSLEKSSAQHEQQLRQLGK*	12689.6	8.5946	None	Spacer Accession=NODE_5_length_169687_cov_170.486593|Spacer_Pos=169521-169552|CAS-TypeIF(159149-167380)|Target Accession=NODE_14_length_7414_cov_178.395802|Target_Pos=17-48
Medium Confidence	Undefined_Organism	495	NODE_1_length_626320_cov_168.576109	555661	555939	-	Protein(555661-555939)	93	Acr candidate	-	-	MATNLDYIWLHLFNGNRLSDRQAMVQFAYGAFRSRVSEKRYEYHIQDEFVTIHPQCSVVRYKEYWICPKFLRTKQAQRIREELMKKTHGRRS*	11273	10.274	None	Spacer Accession=NODE_5_length_169687_cov_170.486593|Spacer_Pos=169521-169552|CAS-TypeIF(159149-167380)|Target Accession=NODE_14_length_7414_cov_178.395802|Target_Pos=17-48
Medium Confidence	Undefined_Organism	496	NODE_1_length_626320_cov_168.576109	555946	556182	-	Protein(555946-556182)	79	WP_031577006.1|HTH_3-1-AcrIIA1|36.1|4e-05	PHAGE_Pseudo_vB_PaeP_Tr60_Ab31_NC_023575-gi|589286923|ref|YP_009007118.1||0.005	-	MSDMIDLIIQKAGGATELAKKLDITRPAVLHWKARGYKVPPIKHAFKIENITGIPKEEIWTDYFNSKPQNITNDGLEG*	8777.16	8.5376	None	Spacer Accession=NODE_5_length_169687_cov_170.486593|Spacer_Pos=169521-169552|CAS-TypeIF(159149-167380)|Target Accession=NODE_14_length_7414_cov_178.395802|Target_Pos=17-48
Medium Confidence	Undefined_Organism	195	NODE_2_length_270291_cov_191.598903	203214	203513	-	Protein(203214-203513)	100	Acr candidate	-	-	MKQQSTKHNLSISKQSIKRDVFTDHKKAITILISFGTLILISMAMLAFFNDQLGNTTKLIALVAMPIIMIISFVLNQYLRKKIKDKKLHYKQILKNFSK*	11438.9	11.1138	None	Spacer Accession=NODE_5_length_169687_cov_170.486593|Spacer_Pos=169521-169552|CAS-TypeIF(159149-167380)|Target Accession=NODE_14_length_7414_cov_178.395802|Target_Pos=17-48
Medium Confidence	Undefined_Organism	196	NODE_2_length_270291_cov_191.598903	203533	203859	-	Protein(203533-203859)	109	WP_086295736.1|HTH_XRE|AcrIIA14|30.8|0.0027	PHAGE_Burkho_phiE202_NC_009234-gi|134288765|ref|YP_001111052.1||1.86e-16	-	MHKKEFSERLIHIREQKGYTVEEFGVLAGVGKTSQYNYEKGARKPDAEYFERLALIGCDIQYIITGIPSDSLITKEEAKLIKLYRSASFPFKQAVMRVLGSDLSDDSE*	12295	6.4714	None	Spacer Accession=NODE_5_length_169687_cov_170.486593|Spacer_Pos=169521-169552|CAS-TypeIF(159149-167380)|Target Accession=NODE_14_length_7414_cov_178.395802|Target_Pos=17-48

## Sheet: DSM 105984
#Classification	GCF	Position	NC ID	Start	End	Strand	Protein ID	aa Length	Acr/Aca	MGE/Prophage MetaData	Acr_Hit|pident	Sequence	Molecular Weight	Isoelectric Point	Self Target w/in 5000 BP	Self Target Outside 5000 BP
Low Confidence	Undefined_Organism	183	NODE_1_length_633778_cov_155.611676	201015	201539	-	Protein(201015-201539)	175	Acr candidate	-	-	MRIIAALLMLGQLSISFAEPLTHEMKNFMRLAAAKNGDQYGFTKEDAQQYLGITWGKSPRRGAIYESTQHLTNDADQPTFEYSANRGTRILTLYFTEPVKPFVKAIERLRGFEAAWFPRQQANGLPIHYFEGKNPSEFIPTRKLWIRIYECADKPQTPCIRRAQLIFAKPGAVF*	19961	9.9344	None	None
Low Confidence	Undefined_Organism	184	NODE_1_length_633778_cov_155.611676	201553	202116	-	Protein(201553-202116)	188	AcrIIA15-0-WP_000600643.1|HTH_7|47.7|5.4e-06	-	-	MAKTYDERHAEIMDVSLRLFIQYGLKDTTVNDIVKAVNIAKGTFYHYFQSKEDLILELRAKYIRSYLSLTSDYMEQCKHSDWHGKIRAWCQGSIVHYYEHRAEHIALFQQQYYLDERREHLSVIIFLEEFLRTGNEVQAWHVASPDLVALLIYQGINLAFDECREKTFEELEGMTERLYDVFIKMVS*	22275.4	5.793	None	None
Low Confidence	Undefined_Organism	480	NODE_1_length_633778_cov_155.611676	549381	549854	-	Protein(549381-549854)	158	AcrIIA7-2-WP_046340465.1|HTH_7|54.9|2.7e-41	PHAGE_Acinet_AbP2_NC_041998-gi|100056|ref|YP_009609909.1||4.86e-49	-	MAAENKVGRPTKYKHEYCELAFNYCLLGATDADLARFFDVSEQTINTWKHEYPEFLESIKKGKVDADALVAKSLFQRAIGYQYIETKNEMSEQGMKKSVTTKEALPDTTAQIFWLKNRQPDKWRDKPVAVSEELDATPVKIVVNVQDARKQDDKPET*	18022.4	5.8442	None	None
Low Confidence	Undefined_Organism	481	NODE_1_length_633778_cov_155.611676	549864	550205	-	Protein(549864-550205)	114	Acr candidate	-	-	MDNKVNFETWLHNKTTVVAGFLGSALLSFAIWVFSQVYGQSVKHLESIDNKFDMLTKDIIAIKLQDSANTITINTLKNDVLDLKTVNKEVLGRLGSLEKSSAQHEQQLRQLGK*	12689.6	8.5946	None	None
Low Confidence	Undefined_Organism	499	NODE_1_length_633778_cov_155.611676	563119	563397	-	Protein(563119-563397)	93	Acr candidate	-	-	MATNLDYIWLHLFNGNRLSDRQAMVQFAYGAFRSRVSEKRYEYHIQDEFVTIHPQCSVVRYKEYWICPKFLRTKQAQRIREELMKKTHGRRS*	11273	10.274	None	None
Low Confidence	Undefined_Organism	500	NODE_1_length_633778_cov_155.611676	563404	563640	-	Protein(563404-563640)	79	WP_031577006.1|HTH_3-1-AcrIIA1|36.1|3.9e-05	PHAGE_Pseudo_vB_PaeP_Tr60_Ab31_NC_023575-gi|589286923|ref|YP_009007118.1||0.005	-	MSDMIDLIIQKAGGATELAKKLDITRPAVLHWKARGYKVPPIKHAFKIENITGIPKEEIWTDYFNSKPQNITNDGLEG*	8777.16	8.5376	None	None
Low Confidence	Undefined_Organism	195	NODE_3_length_270303_cov_197.962291	203214	203513	-	Protein(203214-203513)	100	Acr candidate	-	-	MKQQSTKHNLSISKQSIKRDVFTDHKKAITILISFGTLILISMAMLAFFNDQLGNTTKLIALVAMPIIMIISFVLNQYLRKKIKDKKLHYKQILKNFSK*	11438.9	11.1138	None	None
Low Confidence	Undefined_Organism	196	NODE_3_length_270303_cov_197.962291	203533	203859	-	Protein(203533-203859)	109	WP_086295736.1|HTH_XRE|AcrIIA14|30.8|0.0026	PHAGE_Burkho_phiE202_NC_009234-gi|134288765|ref|YP_001111052.1||1.86e-16	-	MHKKEFSERLIHIREQKGYTVEEFGVLAGVGKTSQYNYEKGARKPDAEYFERLALIGCDIQYIITGIPSDSLITKEEAKLIKLYRSASFPFKQAVMRVLGSDLSDDSE*	12295	6.4714	None	None

## Sheet: DSM 106597
#Classification	GCF	Position	NC ID	Start	End	Strand	Protein ID	aa Length	Acr/Aca	MGE/Prophage MetaData	Acr_Hit|pident	Sequence	Molecular Weight	Isoelectric Point	Self Target w/in 5000 BP	Self Target Outside 5000 BP
Medium Confidence	Undefined_Organism	179	NODE_1_length_626320_cov_238.292398	193557	194081	-	Protein(193557-194081)	175	Acr candidate	-	-	MRIIAALLMLGQLSISFAEPLTHEMKNFMRLAAAKNGDQYGFTKEDAQQYLGITWGKSPRRGAIYESTQHLTNDADQPTFEYSANRGTRILTLYFTEPVKPFVKAIERLRGFEAAWFPRQQANGLPIHYFEGKNPSEFIPTRKLWIRIYECADKPQTPCIRRAQLIFAKPGAVF*	19961	9.9344	None	Spacer Accession=NODE_5_length_169703_cov_237.421097|Spacer_Pos=169537-169568|CAS-TypeIF(159165-167396)|Target Accession=NODE_14_length_7414_cov_251.045523|Target_Pos=17-48
Medium Confidence	Undefined_Organism	180	NODE_1_length_626320_cov_238.292398	194095	194658	-	Protein(194095-194658)	188	AcrIIA15-0-WP_000600643.1|HTH_7|47.7|5.4e-06	-	-	MAKTYDERHAEIMDVSLRLFIQYGLKDTTVNDIVKAVNIAKGTFYHYFQSKEDLILELRAKYIRSYLSLTSDYMEQCKHSDWHGKIRAWCQGSIVHYYEHRAEHIALFQQQYYLDERREHLSVIIFLEEFLRTGNEVQAWHVASPDLVALLIYQGINLAFDECREKTFEELEGMTERLYDVFIKMVS*	22275.4	5.793	None	Spacer Accession=NODE_5_length_169703_cov_237.421097|Spacer_Pos=169537-169568|CAS-TypeIF(159165-167396)|Target Accession=NODE_14_length_7414_cov_251.045523|Target_Pos=17-48
Medium Confidence	Undefined_Organism	476	NODE_1_length_626320_cov_238.292398	541923	542396	-	Protein(541923-542396)	158	AcrIIA7-2-WP_046340465.1|HTH_7|54.9|2.7e-41	PHAGE_Acinet_AbP2_NC_041998-gi|100056|ref|YP_009609909.1||4.86e-49	-	MAAENKVGRPTKYKHEYCELAFNYCLLGATDADLARFFDVSEQTINTWKHEYPEFLESIKKGKVDADALVAKSLFQRAIGYQYIETKNEMSEQGMKKSVTTKEALPDTTAQIFWLKNRQPDKWRDKPVAVSEELDATPVKIVVNVQDARKQDDKPET*	18022.4	5.8442	None	Spacer Accession=NODE_5_length_169703_cov_237.421097|Spacer_Pos=169537-169568|CAS-TypeIF(159165-167396)|Target Accession=NODE_14_length_7414_cov_251.045523|Target_Pos=17-48
Medium Confidence	Undefined_Organism	477	NODE_1_length_626320_cov_238.292398	542406	542747	-	Protein(542406-542747)	114	Acr candidate	-	-	MDNKVNFETWLHNKTTVVAGFLGSALLSFAIWVFSQVYGQSVKHLESIDNKFDMLTKDIIAIKLQDSANTITINTLKNDVLDLKTVNKEVLGRLGSLEKSSAQHEQQLRQLGK*	12689.6	8.5946	None	Spacer Accession=NODE_5_length_169703_cov_237.421097|Spacer_Pos=169537-169568|CAS-TypeIF(159165-167396)|Target Accession=NODE_14_length_7414_cov_251.045523|Target_Pos=17-48
Medium Confidence	Undefined_Organism	495	NODE_1_length_626320_cov_238.292398	555661	555939	-	Protein(555661-555939)	93	Acr candidate	-	-	MATNLDYIWLHLFNGNRLSDRQAMVQFAYGAFRSRVSEKRYEYHIQDEFVTIHPQCSVVRYKEYWICPKFLRTKQAQRIREELMKKTHGRRS*	11273	10.274	None	Spacer Accession=NODE_5_length_169703_cov_237.421097|Spacer_Pos=169537-169568|CAS-TypeIF(159165-167396)|Target Accession=NODE_14_length_7414_cov_251.045523|Target_Pos=17-48
Medium Confidence	Undefined_Organism	496	NODE_1_length_626320_cov_238.292398	555946	556182	-	Protein(555946-556182)	79	WP_031577006.1|HTH_3-1-AcrIIA1|36.1|3.9e-05	PHAGE_Pseudo_vB_PaeP_Tr60_Ab31_NC_023575-gi|589286923|ref|YP_009007118.1||0.005	-	MSDMIDLIIQKAGGATELAKKLDITRPAVLHWKARGYKVPPIKHAFKIENITGIPKEEIWTDYFNSKPQNITNDGLEG*	8777.16	8.5376	None	Spacer Accession=NODE_5_length_169703_cov_237.421097|Spacer_Pos=169537-169568|CAS-TypeIF(159165-167396)|Target Accession=NODE_14_length_7414_cov_251.045523|Target_Pos=17-48
Medium Confidence	Undefined_Organism	195	NODE_3_length_270291_cov_270.821530	203214	203513	-	Protein(203214-203513)	100	Acr candidate	-	-	MKQQSTKHNLSISKQSIKRDVFTDHKKAITILISFGTLILISMAMLAFFNDQLGNTTKLIALVAMPIIMIISFVLNQYLRKKIKDKKLHYKQILKNFSK*	11438.9	11.1138	None	Spacer Accession=NODE_5_length_169703_cov_237.421097|Spacer_Pos=169537-169568|CAS-TypeIF(159165-167396)|Target Accession=NODE_14_length_7414_cov_251.045523|Target_Pos=17-48
Medium Confidence	Undefined_Organism	196	NODE_3_length_270291_cov_270.821530	203533	203859	-	Protein(203533-203859)	109	WP_086295736.1|HTH_XRE|AcrIIA14|30.8|0.0026	PHAGE_Burkho_phiE202_NC_009234-gi|134288765|ref|YP_001111052.1||1.86e-16	-	MHKKEFSERLIHIREQKGYTVEEFGVLAGVGKTSQYNYEKGARKPDAEYFERLALIGCDIQYIITGIPSDSLITKEEAKLIKLYRSASFPFKQAVMRVLGSDLSDDSE*	12295	6.4714	None	Spacer Accession=NODE_5_length_169703_cov_237.421097|Spacer_Pos=169537-169568|CAS-TypeIF(159165-167396)|Target Accession=NODE_14_length_7414_cov_251.045523|Target_Pos=17-48

[truncated: 16 more sheets: DSM 108048, DSM 108045, DSM 110179, DSM 110473, DSM 18708T, SH04, BM-Y, Strain 20, ATCC_51249, F6512, F6513, F6514, F6515, F6516, F9188, G9145]
