# Supplementary material for: Comparative Genomic Analysis of the Human Pathogen Wohlfahrtiimonas Chitiniclastica Provides Insight Into the Identification of Antimicrobial Resistance Genotypes and Potential Virulence Traits
Source: Front Cell Infect Microbiol. 2022 Jul 7;12:912427. doi: 10.3389/fcimb.2022.912427 (PMC9301364; doi:10.3389/fcimb.2022.912427)
Supplement: Supplementary file 4 [file Table_4.xlsx]

## Sheet: S04_Core_Genome
Gene	Non-unique Gene name	Annotation	No. isolates	No. sequences	Avg sequences per isolate	Genome Fragment	Order within Fragment	Accessory Fragment	Accessory Order with Fragment	QC	Min group size nuc	Max group size nuc	Avg group size nuc	ATCC_51249	BM-Y	DSM_100374	DSM_100375	DSM_100676	DSM_100917	DSM_105708	DSM_105712	DSM_105838	DSM_105839	DSM_105984	DSM_106597	DSM_108045	DSM_108048	DSM_110179	DSM_110473	DSM_18708T	F6512	F6513	F6514	F6515	F6516	F9188	G9145	SH04	Strain_20
J7553_01745		cupin domain-containing protein	26	26	1	1	2524				374	392	384	B9T10_03870.p01	BMY_0609.p01	a04b031c37c06570dd644ef46d09ac8c_5595	2cf5bec40a3ef4476bf46f509f729c16_4733	102e21fe2bbcace64a7555dd0bcc9007_7553	4a9cac2c1a817d9acdec143b653b9a80_7517	ac8fed72b32d7540cf9a1b9ac12df95a_1384	197b0243bc5bc4c380ecfb8919a026b1_7609	79ccbe49faa72747a800162f6a36c0ca_1765	614e29224da4f337b8899b3142d81070_2296	d977e7edc1a56720a787e465ab4ce472_2309	e653c257947c2dd0a414de7cb159ba14_2296	31e4ba73e5ddb8c85dea419204f0df5a_360	752b3971131f3206662b5e22da3b23aa_2551	83683a6c7ca473684645e0830a47223d_372	03da1bd30b32560bef8e38ea7761d9fe_5987	c648bd7c3a222aa51bed3e3836bcf8c8_970	B9T21_06675.p01	B9T15_01195.p01	B9T14_03835.p01	B9T11_05175.p01	B9T12_04515.p01	B9T18_01255.p01	B9T13_07845.p01	F387_01187.p01	A6V30_06955.p01
A6V30_06950		tryptophan biosynthesis protein TrpCF	26	26	1	1	2533				569	653	572	B9T10_03875.p01	BMY_0610.p01	a04b031c37c06570dd644ef46d09ac8c_5599	2cf5bec40a3ef4476bf46f509f729c16_4729	102e21fe2bbcace64a7555dd0bcc9007_7549	4a9cac2c1a817d9acdec143b653b9a80_7521	ac8fed72b32d7540cf9a1b9ac12df95a_1388	197b0243bc5bc4c380ecfb8919a026b1_7613	79ccbe49faa72747a800162f6a36c0ca_1769	614e29224da4f337b8899b3142d81070_2300	d977e7edc1a56720a787e465ab4ce472_2313	e653c257947c2dd0a414de7cb159ba14_2300	31e4ba73e5ddb8c85dea419204f0df5a_356	752b3971131f3206662b5e22da3b23aa_2547	83683a6c7ca473684645e0830a47223d_368	03da1bd30b32560bef8e38ea7761d9fe_5983	c648bd7c3a222aa51bed3e3836bcf8c8_966	B9T21_06680.p01	B9T15_01190.p01	B9T14_03840.p01	B9T11_05180.p01	B9T12_04510.p01	B9T18_01250.p01	B9T13_07850.p01	F387_01188.p01	A6V30_06950.p01
J7547_09500		SWIM zinc finger family protein	26	26	1	1	2540				1436	1436	1436	B9T10_03890.p01	BMY_0613.p01	a04b031c37c06570dd644ef46d09ac8c_5614	2cf5bec40a3ef4476bf46f509f729c16_5674	102e21fe2bbcace64a7555dd0bcc9007_7538	4a9cac2c1a817d9acdec143b653b9a80_7532	ac8fed72b32d7540cf9a1b9ac12df95a_1399	197b0243bc5bc4c380ecfb8919a026b1_5955	79ccbe49faa72747a800162f6a36c0ca_1780	614e29224da4f337b8899b3142d81070_2311	d977e7edc1a56720a787e465ab4ce472_2324	e653c257947c2dd0a414de7cb159ba14_2311	31e4ba73e5ddb8c85dea419204f0df5a_345	752b3971131f3206662b5e22da3b23aa_2532	83683a6c7ca473684645e0830a47223d_357	03da1bd30b32560bef8e38ea7761d9fe_5968	c648bd7c3a222aa51bed3e3836bcf8c8_951	B9T21_06695.p01	B9T15_01175.p01	B9T14_03855.p01	B9T11_05195.p01	B9T12_04495.p01	B9T18_01235.p01	B9T13_07865.p01	F387_01199.p01	A6V30_06935.p01
B9T11_05255		FAD-dependent oxidoreductase	26	26	1	1	2554				1283	1283	1283	B9T10_03950.p01	BMY_0625.p01	a04b031c37c06570dd644ef46d09ac8c_5661	2cf5bec40a3ef4476bf46f509f729c16_5626	102e21fe2bbcace64a7555dd0bcc9007_6075	4a9cac2c1a817d9acdec143b653b9a80_6128	ac8fed72b32d7540cf9a1b9ac12df95a_1451	197b0243bc5bc4c380ecfb8919a026b1_6007	79ccbe49faa72747a800162f6a36c0ca_1828	614e29224da4f337b8899b3142d81070_6765	d977e7edc1a56720a787e465ab4ce472_7184	e653c257947c2dd0a414de7cb159ba14_7176	31e4ba73e5ddb8c85dea419204f0df5a_293	752b3971131f3206662b5e22da3b23aa_2484	83683a6c7ca473684645e0830a47223d_309	03da1bd30b32560bef8e38ea7761d9fe_5920	c648bd7c3a222aa51bed3e3836bcf8c8_899	B9T21_06755.p01	B9T15_01115.p01	B9T14_03915.p01	B9T11_05255.p01	B9T12_04435.p01	B9T18_01170.p01	B9T13_07930.p01	F387_01681.p01	A6V30_06870.p01
J7620_03115		neutral zinc metallopeptidase	26	26	1	1	2557				854	854	854	B9T10_03960.p01	BMY_0627.p01	a04b031c37c06570dd644ef46d09ac8c_5669	2cf5bec40a3ef4476bf46f509f729c16_5618	102e21fe2bbcace64a7555dd0bcc9007_6067	4a9cac2c1a817d9acdec143b653b9a80_6120	ac8fed72b32d7540cf9a1b9ac12df95a_1459	197b0243bc5bc4c380ecfb8919a026b1_6015	79ccbe49faa72747a800162f6a36c0ca_1836	614e29224da4f337b8899b3142d81070_6773	d977e7edc1a56720a787e465ab4ce472_7176	e653c257947c2dd0a414de7cb159ba14_7168	31e4ba73e5ddb8c85dea419204f0df5a_285	752b3971131f3206662b5e22da3b23aa_2476	83683a6c7ca473684645e0830a47223d_301	03da1bd30b32560bef8e38ea7761d9fe_5912	c648bd7c3a222aa51bed3e3836bcf8c8_891	B9T21_06765.p01	B9T15_01105.p01	B9T14_03925.p01	B9T11_05265.p01	B9T12_04425.p01	B9T18_01160.p01	B9T13_07940.p01	F387_01683.p01	A6V30_06860.p01
thiD		bifunctional hydroxymethylpyrimidine kinase/phosphomethylpyrimidine kinase	26	26	1	1	2562				797	797	797	B9T10_03985.p01	BMY_0632.p01	a04b031c37c06570dd644ef46d09ac8c_5689	2cf5bec40a3ef4476bf46f509f729c16_5598	102e21fe2bbcace64a7555dd0bcc9007_6047	4a9cac2c1a817d9acdec143b653b9a80_6100	ac8fed72b32d7540cf9a1b9ac12df95a_1479	197b0243bc5bc4c380ecfb8919a026b1_6035	79ccbe49faa72747a800162f6a36c0ca_1856	614e29224da4f337b8899b3142d81070_6793	d977e7edc1a56720a787e465ab4ce472_7157	e653c257947c2dd0a414de7cb159ba14_7148	31e4ba73e5ddb8c85dea419204f0df5a_265	752b3971131f3206662b5e22da3b23aa_2456	83683a6c7ca473684645e0830a47223d_281	03da1bd30b32560bef8e38ea7761d9fe_5892	c648bd7c3a222aa51bed3e3836bcf8c8_871	B9T21_06790.p01	B9T15_01080.p01	B9T14_03950.p01	B9T11_05290.p01	B9T12_04400.p01	B9T18_01135.p01	B9T13_07965.p01	F387_01688.p01	A6V30_06835.p01
B9T13_07975		YigZ family protein	26	26	1	1	2564				599	599	599	B9T10_03995.p01	BMY_0634.p01	a04b031c37c06570dd644ef46d09ac8c_5697	2cf5bec40a3ef4476bf46f509f729c16_5590	102e21fe2bbcace64a7555dd0bcc9007_6039	4a9cac2c1a817d9acdec143b653b9a80_6092	ac8fed72b32d7540cf9a1b9ac12df95a_1487	197b0243bc5bc4c380ecfb8919a026b1_6043	79ccbe49faa72747a800162f6a36c0ca_1864	614e29224da4f337b8899b3142d81070_6801	d977e7edc1a56720a787e465ab4ce472_7149	e653c257947c2dd0a414de7cb159ba14_7140	31e4ba73e5ddb8c85dea419204f0df5a_257	752b3971131f3206662b5e22da3b23aa_2448	83683a6c7ca473684645e0830a47223d_273	03da1bd30b32560bef8e38ea7761d9fe_5884	c648bd7c3a222aa51bed3e3836bcf8c8_863	B9T21_06800.p01	B9T15_01070.p01	B9T14_03960.p01	B9T11_05300.p01	B9T12_04390.p01	B9T18_01125.p01	B9T13_07975.p01	F387_01690.p01	A6V30_06825.p01
J7600_08575		UDP-N-acetylmuramoyl-tripeptide--D-alanyl-D- alanine ligase	26	26	1	1	2567				1349	1349	1349	B9T10_04005.p01	BMY_0636.p01	a04b031c37c06570dd644ef46d09ac8c_5705	2cf5bec40a3ef4476bf46f509f729c16_5582	102e21fe2bbcace64a7555dd0bcc9007_6031	4a9cac2c1a817d9acdec143b653b9a80_6084	ac8fed72b32d7540cf9a1b9ac12df95a_1495	197b0243bc5bc4c380ecfb8919a026b1_6051	79ccbe49faa72747a800162f6a36c0ca_1872	614e29224da4f337b8899b3142d81070_6809	d977e7edc1a56720a787e465ab4ce472_7141	e653c257947c2dd0a414de7cb159ba14_7132	31e4ba73e5ddb8c85dea419204f0df5a_249	752b3971131f3206662b5e22da3b23aa_2440	83683a6c7ca473684645e0830a47223d_265	03da1bd30b32560bef8e38ea7761d9fe_5876	c648bd7c3a222aa51bed3e3836bcf8c8_855	B9T21_06810.p01	B9T15_01060.p01	B9T14_03970.p01	B9T11_05310.p01	B9T12_04380.p01	B9T18_01115.p01	B9T13_07985.p01	F387_01692.p01	A6V30_06815.p01
rsmH		16S rRNA (cytosine(1402)-N(4))-methyltransferase RsmH	26	26	1	1	2571				926	926	926	B9T10_04025.p01	BMY_0640.p01	a04b031c37c06570dd644ef46d09ac8c_5721	2cf5bec40a3ef4476bf46f509f729c16_5566	102e21fe2bbcace64a7555dd0bcc9007_6015	4a9cac2c1a817d9acdec143b653b9a80_6068	ac8fed72b32d7540cf9a1b9ac12df95a_1511	197b0243bc5bc4c380ecfb8919a026b1_6067	79ccbe49faa72747a800162f6a36c0ca_1888	614e29224da4f337b8899b3142d81070_6825	d977e7edc1a56720a787e465ab4ce472_7125	e653c257947c2dd0a414de7cb159ba14_7116	31e4ba73e5ddb8c85dea419204f0df5a_233	752b3971131f3206662b5e22da3b23aa_2424	83683a6c7ca473684645e0830a47223d_249	03da1bd30b32560bef8e38ea7761d9fe_5860	c648bd7c3a222aa51bed3e3836bcf8c8_839	B9T21_06830.p01	B9T15_01040.p01	B9T14_03990.p01	B9T11_05330.p01	B9T12_04360.p01	B9T18_01095.p01	B9T13_08005.p01	F387_01696.p01	A6V30_06795.p01
J7624_07345		VOC family protein	26	26	1	1	2576				572	578	574	B9T10_04050.p01	BMY_0645.p01	a04b031c37c06570dd644ef46d09ac8c_5741	2cf5bec40a3ef4476bf46f509f729c16_5546	102e21fe2bbcace64a7555dd0bcc9007_5995	4a9cac2c1a817d9acdec143b653b9a80_6048	ac8fed72b32d7540cf9a1b9ac12df95a_1531	197b0243bc5bc4c380ecfb8919a026b1_6087	79ccbe49faa72747a800162f6a36c0ca_1908	614e29224da4f337b8899b3142d81070_6845	d977e7edc1a56720a787e465ab4ce472_7105	e653c257947c2dd0a414de7cb159ba14_7096	31e4ba73e5ddb8c85dea419204f0df5a_213	752b3971131f3206662b5e22da3b23aa_2404	83683a6c7ca473684645e0830a47223d_229	03da1bd30b32560bef8e38ea7761d9fe_5840	c648bd7c3a222aa51bed3e3836bcf8c8_819	B9T21_06855.p01	B9T15_01015.p01	B9T14_04015.p01	B9T11_05355.p01	B9T12_04335.p01	B9T18_01070.p01	B9T13_08030.p01	F387_01701.p01	A6V30_06770.p01
J7561_07465		(2Fe-2S)-binding protein	26	26	1	1	2890				521	548	546	B9T10_04245.p01	BMY_0675.p01	a04b031c37c06570dd644ef46d09ac8c_5839	2cf5bec40a3ef4476bf46f509f729c16_5449	102e21fe2bbcace64a7555dd0bcc9007_5891	4a9cac2c1a817d9acdec143b653b9a80_5943	ac8fed72b32d7540cf9a1b9ac12df95a_1629	197b0243bc5bc4c380ecfb8919a026b1_6181	79ccbe49faa72747a800162f6a36c0ca_2016	614e29224da4f337b8899b3142d81070_6955	d977e7edc1a56720a787e465ab4ce472_6996	e653c257947c2dd0a414de7cb159ba14_6986	31e4ba73e5ddb8c85dea419204f0df5a_119	752b3971131f3206662b5e22da3b23aa_2294	83683a6c7ca473684645e0830a47223d_119	03da1bd30b32560bef8e38ea7761d9fe_5744	c648bd7c3a222aa51bed3e3836bcf8c8_693	B9T21_07000.p01	B9T15_00890.p01	B9T14_04140.p01	B9T11_05480.p01	B9T12_04200.p01	B9T18_00860.p01	B9T13_08155.p01	F387_01728.p01	A6V30_05070.p01
B143_RS0109055		ABC transporter ATP-binding protein	26	26	1	1	1205				758	758	758	B9T10_00230.p01	BMY_1924.p01	a04b031c37c06570dd644ef46d09ac8c_7502	2cf5bec40a3ef4476bf46f509f729c16_7474	102e21fe2bbcace64a7555dd0bcc9007_7224	4a9cac2c1a817d9acdec143b653b9a80_7002	ac8fed72b32d7540cf9a1b9ac12df95a_7386	197b0243bc5bc4c380ecfb8919a026b1_3974	79ccbe49faa72747a800162f6a36c0ca_7057	614e29224da4f337b8899b3142d81070_7737	d977e7edc1a56720a787e465ab4ce472_7858	e653c257947c2dd0a414de7cb159ba14_7849	31e4ba73e5ddb8c85dea419204f0df5a_7068	752b3971131f3206662b5e22da3b23aa_7265	83683a6c7ca473684645e0830a47223d_7796	03da1bd30b32560bef8e38ea7761d9fe_7268	c648bd7c3a222aa51bed3e3836bcf8c8_7112	B9T21_00235.p01	B9T15_04810.p01	B9T14_00230.p01	B9T11_02515.p01	B9T12_00225.p01	B9T18_04890.p01	B9T13_00230.p01	F387_00881.p01	A6V30_01875.p01
ttrA		tetrathionate reductase subunit TtrA	26	26	1	1	2882				3005	3098	3094	B9T10_04280.p01	BMY_0682.p01	a04b031c37c06570dd644ef46d09ac8c_5867	2cf5bec40a3ef4476bf46f509f729c16_5421	102e21fe2bbcace64a7555dd0bcc9007_5863	4a9cac2c1a817d9acdec143b653b9a80_5915	ac8fed72b32d7540cf9a1b9ac12df95a_1657	197b0243bc5bc4c380ecfb8919a026b1_6208	79ccbe49faa72747a800162f6a36c0ca_2044	614e29224da4f337b8899b3142d81070_6983	d977e7edc1a56720a787e465ab4ce472_6968	e653c257947c2dd0a414de7cb159ba14_6958	31e4ba73e5ddb8c85dea419204f0df5a_91	752b3971131f3206662b5e22da3b23aa_2266	83683a6c7ca473684645e0830a47223d_91	03da1bd30b32560bef8e38ea7761d9fe_5716	c648bd7c3a222aa51bed3e3836bcf8c8_665	B9T21_07035.p01	B9T15_00855.p01	B9T14_04175.p01	B9T11_05515.p01	B9T12_04165.p01	B9T18_00825.p01	B9T13_08190.p01	F387_01735.p01	A6V30_05105.p01
pykF		pyruvate kinase PykF	26	26	1	1	2879				1316	1406	1402	B9T10_04295.p01	BMY_0685.p01	a04b031c37c06570dd644ef46d09ac8c_7793	2cf5bec40a3ef4476bf46f509f729c16_5397	102e21fe2bbcace64a7555dd0bcc9007_5851	4a9cac2c1a817d9acdec143b653b9a80_5903	ac8fed72b32d7540cf9a1b9ac12df95a_1669	197b0243bc5bc4c380ecfb8919a026b1_6220	79ccbe49faa72747a800162f6a36c0ca_2068	614e29224da4f337b8899b3142d81070_6995	d977e7edc1a56720a787e465ab4ce472_6956	e653c257947c2dd0a414de7cb159ba14_6946	31e4ba73e5ddb8c85dea419204f0df5a_79	752b3971131f3206662b5e22da3b23aa_2254	83683a6c7ca473684645e0830a47223d_79	03da1bd30b32560bef8e38ea7761d9fe_7950	c648bd7c3a222aa51bed3e3836bcf8c8_653	B9T21_07065.p01	B9T15_00825.p01	B9T14_04205.p01	B9T11_05545.p01	B9T12_04135.p01	B9T18_00810.p01	B9T13_08220.p01	F387_01741.p01	A6V30_05120.p01
F387_01767		D-amino acid dehydrogenase	26	26	1	1	2862				1238	1238	1238	B9T10_04365.p01	BMY_0700.p01	a04b031c37c06570dd644ef46d09ac8c_7849	2cf5bec40a3ef4476bf46f509f729c16_5253	102e21fe2bbcace64a7555dd0bcc9007_5729	4a9cac2c1a817d9acdec143b653b9a80_5781	ac8fed72b32d7540cf9a1b9ac12df95a_1725	197b0243bc5bc4c380ecfb8919a026b1_6274	79ccbe49faa72747a800162f6a36c0ca_2124	614e29224da4f337b8899b3142d81070_7051	d977e7edc1a56720a787e465ab4ce472_6901	e653c257947c2dd0a414de7cb159ba14_6891	31e4ba73e5ddb8c85dea419204f0df5a_23	752b3971131f3206662b5e22da3b23aa_2198	83683a6c7ca473684645e0830a47223d_23	03da1bd30b32560bef8e38ea7761d9fe_7896	c648bd7c3a222aa51bed3e3836bcf8c8_597	B9T21_07135.p01	B9T15_00755.p01	B9T14_04275.p01	B9T11_05615.p01	B9T12_04065.p01	B9T18_00740.p01	B9T13_08290.p01	F387_01767.p01	A6V30_05190.p01
ychF		redox-regulated ATPase YchF	26	26	1	1	2842				1028	1091	1088	B9T10_04410.p01	BMY_0712.p01	a04b031c37c06570dd644ef46d09ac8c_5889	2cf5bec40a3ef4476bf46f509f729c16_6137	102e21fe2bbcace64a7555dd0bcc9007_5701	4a9cac2c1a817d9acdec143b653b9a80_5737	ac8fed72b32d7540cf9a1b9ac12df95a_1769	197b0243bc5bc4c380ecfb8919a026b1_4945	79ccbe49faa72747a800162f6a36c0ca_2164	614e29224da4f337b8899b3142d81070_6310	d977e7edc1a56720a787e465ab4ce472_6432	e653c257947c2dd0a414de7cb159ba14_6419	31e4ba73e5ddb8c85dea419204f0df5a_5129	752b3971131f3206662b5e22da3b23aa_2162	83683a6c7ca473684645e0830a47223d_6254	03da1bd30b32560bef8e38ea7761d9fe_5269	c648bd7c3a222aa51bed3e3836bcf8c8_557	B9T21_07190.p01	B9T15_00700.p01	B9T14_04330.p01	B9T11_05670.p01	B9T12_04010.p01	B9T18_00695.p01	B9T13_08345.p01	F387_01677.p01	A6V30_05240.p01
carA		glutamine-hydrolyzing carbamoyl-phosphate synthase small subunit	26	26	1	1	2830				1106	1124	1123	B9T10_04455.p01	BMY_0722.p01	a04b031c37c06570dd644ef46d09ac8c_5924	2cf5bec40a3ef4476bf46f509f729c16_6101	102e21fe2bbcace64a7555dd0bcc9007_5665	4a9cac2c1a817d9acdec143b653b9a80_5701	ac8fed72b32d7540cf9a1b9ac12df95a_1805	197b0243bc5bc4c380ecfb8919a026b1_4981	79ccbe49faa72747a800162f6a36c0ca_2200	614e29224da4f337b8899b3142d81070_6274	d977e7edc1a56720a787e465ab4ce472_6396	e653c257947c2dd0a414de7cb159ba14_6383	31e4ba73e5ddb8c85dea419204f0df5a_5165	752b3971131f3206662b5e22da3b23aa_2126	83683a6c7ca473684645e0830a47223d_6290	03da1bd30b32560bef8e38ea7761d9fe_5305	c648bd7c3a222aa51bed3e3836bcf8c8_521	B9T21_07235.p01	B9T15_00655.p01	B9T14_04375.p01	B9T11_05715.p01	B9T12_03965.p01	B9T18_00650.p01	B9T13_08390.p01	F387_01668.p01	A6V30_05285.p01
aroQ		type II 3-dehydroquinate dehydratase	26	26	1	1	2818				416	470	467	B9T10_04510.p01	BMY_0734.p01	a04b031c37c06570dd644ef46d09ac8c_5964	2cf5bec40a3ef4476bf46f509f729c16_6057	102e21fe2bbcace64a7555dd0bcc9007_5621	4a9cac2c1a817d9acdec143b653b9a80_5657	ac8fed72b32d7540cf9a1b9ac12df95a_1845	197b0243bc5bc4c380ecfb8919a026b1_5024	79ccbe49faa72747a800162f6a36c0ca_2240	614e29224da4f337b8899b3142d81070_6234	d977e7edc1a56720a787e465ab4ce472_6356	e653c257947c2dd0a414de7cb159ba14_6343	31e4ba73e5ddb8c85dea419204f0df5a_5209	752b3971131f3206662b5e22da3b23aa_2086	83683a6c7ca473684645e0830a47223d_6329	03da1bd30b32560bef8e38ea7761d9fe_5345	c648bd7c3a222aa51bed3e3836bcf8c8_477	B9T21_07290.p01	B9T15_00600.p01	B9T14_04430.p01	B9T11_05770.p01	B9T12_03915.p01	B9T18_00600.p01	B9T13_08440.p01	F387_01657.p01	A6V30_05335.p01
B9T11_05800		acetyl-CoA carboxylase carboxyltransferase subunit beta	26	26	1	1	2812				746	911	904	B9T10_04540.p01	BMY_0741.p01	a04b031c37c06570dd644ef46d09ac8c_5988	2cf5bec40a3ef4476bf46f509f729c16_6033	102e21fe2bbcace64a7555dd0bcc9007_5597	4a9cac2c1a817d9acdec143b653b9a80_5633	ac8fed72b32d7540cf9a1b9ac12df95a_1869	197b0243bc5bc4c380ecfb8919a026b1_5048	79ccbe49faa72747a800162f6a36c0ca_2268	614e29224da4f337b8899b3142d81070_6210	d977e7edc1a56720a787e465ab4ce472_6332	e653c257947c2dd0a414de7cb159ba14_6319	31e4ba73e5ddb8c85dea419204f0df5a_5233	752b3971131f3206662b5e22da3b23aa_2062	83683a6c7ca473684645e0830a47223d_6353	03da1bd30b32560bef8e38ea7761d9fe_5369	c648bd7c3a222aa51bed3e3836bcf8c8_453	B9T21_07325.p01	B9T15_00570.p01	B9T14_04460.p01	B9T11_05800.p01	B9T12_03885.p01	B9T18_00570.p01	B9T13_08470.p01	F387_01651.p01	A6V30_05370.p01
J7553_02365		SPOR domain-containing protein	26	26	1	1	2810				716	734	733	B9T10_04550.p01	BMY_0743.p01	a04b031c37c06570dd644ef46d09ac8c_5996	2cf5bec40a3ef4476bf46f509f729c16_6025	102e21fe2bbcace64a7555dd0bcc9007_5589	4a9cac2c1a817d9acdec143b653b9a80_5625	ac8fed72b32d7540cf9a1b9ac12df95a_1877	197b0243bc5bc4c380ecfb8919a026b1_5056	79ccbe49faa72747a800162f6a36c0ca_2276	614e29224da4f337b8899b3142d81070_6202	d977e7edc1a56720a787e465ab4ce472_6324	e653c257947c2dd0a414de7cb159ba14_6311	31e4ba73e5ddb8c85dea419204f0df5a_5241	752b3971131f3206662b5e22da3b23aa_2054	83683a6c7ca473684645e0830a47223d_6361	03da1bd30b32560bef8e38ea7761d9fe_5377	c648bd7c3a222aa51bed3e3836bcf8c8_445	B9T21_07335.p01	B9T15_00560.p01	B9T14_04470.p01	B9T11_05810.p01	B9T12_03875.p01	B9T18_00560.p01	B9T13_08480.p01	F387_01649.p01	A6V30_05380.p01
J7554_02895		IclR family transcriptional regulator	26	26	1	1	2804				518	728	703	B9T10_04580.p01	BMY_0749.p01	a04b031c37c06570dd644ef46d09ac8c_6020	2cf5bec40a3ef4476bf46f509f729c16_6001	102e21fe2bbcace64a7555dd0bcc9007_5565	4a9cac2c1a817d9acdec143b653b9a80_5601	ac8fed72b32d7540cf9a1b9ac12df95a_1901	197b0243bc5bc4c380ecfb8919a026b1_5079	79ccbe49faa72747a800162f6a36c0ca_2300	614e29224da4f337b8899b3142d81070_6178	d977e7edc1a56720a787e465ab4ce472_6300	e653c257947c2dd0a414de7cb159ba14_6287	31e4ba73e5ddb8c85dea419204f0df5a_5265	752b3971131f3206662b5e22da3b23aa_2030	83683a6c7ca473684645e0830a47223d_6385	03da1bd30b32560bef8e38ea7761d9fe_5401	c648bd7c3a222aa51bed3e3836bcf8c8_421	B9T21_07365.p01	B9T15_00530.p01	B9T14_04500.p01	B9T11_05840.p01	B9T12_03845.p01	B9T18_00530.p01	B9T13_08510.p01	F387_01643.p01	A6V30_05410.p01
group_1031	gltS	sodium/glutamate symporter	26	26	1	1	2802				1208	1208	1208	B9T10_04590.p01	BMY_0751.p01	a04b031c37c06570dd644ef46d09ac8c_6028	2cf5bec40a3ef4476bf46f509f729c16_5993	102e21fe2bbcace64a7555dd0bcc9007_5557	4a9cac2c1a817d9acdec143b653b9a80_5593	ac8fed72b32d7540cf9a1b9ac12df95a_1909	197b0243bc5bc4c380ecfb8919a026b1_5086	79ccbe49faa72747a800162f6a36c0ca_2308	614e29224da4f337b8899b3142d81070_6170	d977e7edc1a56720a787e465ab4ce472_6292	e653c257947c2dd0a414de7cb159ba14_6279	31e4ba73e5ddb8c85dea419204f0df5a_5273	752b3971131f3206662b5e22da3b23aa_2022	83683a6c7ca473684645e0830a47223d_6393	03da1bd30b32560bef8e38ea7761d9fe_5409	c648bd7c3a222aa51bed3e3836bcf8c8_413	B9T21_07375.p01	B9T15_00520.p01	B9T14_04510.p01	B9T11_05850.p01	B9T12_03835.p01	B9T18_00520.p01	B9T13_08520.p01	F387_01641.p01	A6V30_05420.p01
hflX		GTPase HflX	26	26	1	1	2797				1241	1289	1283	B9T10_04615.p01	BMY_0756.p01	a04b031c37c06570dd644ef46d09ac8c_6048	2cf5bec40a3ef4476bf46f509f729c16_5973	102e21fe2bbcace64a7555dd0bcc9007_5538	4a9cac2c1a817d9acdec143b653b9a80_5573	ac8fed72b32d7540cf9a1b9ac12df95a_1929	197b0243bc5bc4c380ecfb8919a026b1_5106	79ccbe49faa72747a800162f6a36c0ca_2328	614e29224da4f337b8899b3142d81070_6150	d977e7edc1a56720a787e465ab4ce472_6272	e653c257947c2dd0a414de7cb159ba14_6259	31e4ba73e5ddb8c85dea419204f0df5a_5293	752b3971131f3206662b5e22da3b23aa_2002	83683a6c7ca473684645e0830a47223d_6413	03da1bd30b32560bef8e38ea7761d9fe_5429	c648bd7c3a222aa51bed3e3836bcf8c8_393	B9T21_07400.p01	B9T15_00495.p01	B9T14_04535.p01	B9T11_05875.p01	B9T12_03810.p01	B9T18_00495.p01	B9T13_08545.p01	F387_01636.p01	A6V30_05445.p01
hfq		RNA chaperone Hfq	26	26	1	1	2796				140	266	261	B9T10_04620.p01	BMY_0757.p01	a04b031c37c06570dd644ef46d09ac8c_6052	2cf5bec40a3ef4476bf46f509f729c16_5969	102e21fe2bbcace64a7555dd0bcc9007_5534	4a9cac2c1a817d9acdec143b653b9a80_5569	ac8fed72b32d7540cf9a1b9ac12df95a_1933	197b0243bc5bc4c380ecfb8919a026b1_5110	79ccbe49faa72747a800162f6a36c0ca_2332	614e29224da4f337b8899b3142d81070_6146	d977e7edc1a56720a787e465ab4ce472_6268	e653c257947c2dd0a414de7cb159ba14_6255	31e4ba73e5ddb8c85dea419204f0df5a_5297	752b3971131f3206662b5e22da3b23aa_1998	83683a6c7ca473684645e0830a47223d_6417	03da1bd30b32560bef8e38ea7761d9fe_5433	c648bd7c3a222aa51bed3e3836bcf8c8_389	B9T21_07405.p01	B9T15_00490.p01	B9T14_04540.p01	B9T11_05880.p01	B9T12_03805.p01	B9T18_00490.p01	B9T13_08550.p01	F387_01635.p01	A6V30_05450.p01
dnaA		chromosomal replication initiator protein DnaA	26	26	1	1	2767				1298	1364	1356	B9T10_04710.p01	BMY_0775.p01	a04b031c37c06570dd644ef46d09ac8c_6119	2cf5bec40a3ef4476bf46f509f729c16_5903	102e21fe2bbcace64a7555dd0bcc9007_5419	4a9cac2c1a817d9acdec143b653b9a80_5454	ac8fed72b32d7540cf9a1b9ac12df95a_2000	197b0243bc5bc4c380ecfb8919a026b1_5228	79ccbe49faa72747a800162f6a36c0ca_2399	614e29224da4f337b8899b3142d81070_6033	d977e7edc1a56720a787e465ab4ce472_6154	e653c257947c2dd0a414de7cb159ba14_6140	31e4ba73e5ddb8c85dea419204f0df5a_5403	752b3971131f3206662b5e22da3b23aa_1931	83683a6c7ca473684645e0830a47223d_6532	03da1bd30b32560bef8e38ea7761d9fe_5500	c648bd7c3a222aa51bed3e3836bcf8c8_322	B9T21_07560.p01	B9T15_00400.p01	B9T14_04625.p01	B9T11_05965.p01	B9T12_03715.p01	B9T18_00400.p01	B9T13_08635.p01	F387_01618.p01	A6V30_05535.p01
B9T12_03685		TetR/AcrR family transcriptional regulator	26	26	1	1	2761				581	614	612	B9T10_04740.p01	BMY_0782.p01	a04b031c37c06570dd644ef46d09ac8c_6143	2cf5bec40a3ef4476bf46f509f729c16_5879	102e21fe2bbcace64a7555dd0bcc9007_5397	4a9cac2c1a817d9acdec143b653b9a80_5432	ac8fed72b32d7540cf9a1b9ac12df95a_2024	197b0243bc5bc4c380ecfb8919a026b1_5252	79ccbe49faa72747a800162f6a36c0ca_2423	614e29224da4f337b8899b3142d81070_6009	d977e7edc1a56720a787e465ab4ce472_6130	e653c257947c2dd0a414de7cb159ba14_6116	31e4ba73e5ddb8c85dea419204f0df5a_5427	752b3971131f3206662b5e22da3b23aa_1907	83683a6c7ca473684645e0830a47223d_6556	03da1bd30b32560bef8e38ea7761d9fe_5524	c648bd7c3a222aa51bed3e3836bcf8c8_298	B9T21_07590.p01	B9T15_00370.p01	B9T14_04655.p01	B9T11_05995.p01	B9T12_03685.p01	B9T18_00370.p01	B9T13_08665.p01	F387_01612.p01	A6V30_05565.p01
aroB		3-dehydroquinate synthase	26	26	1	1	2759				1022	1085	1082	B9T10_04750.p01	BMY_0784.p01	a04b031c37c06570dd644ef46d09ac8c_6151	2cf5bec40a3ef4476bf46f509f729c16_5871	102e21fe2bbcace64a7555dd0bcc9007_5389	4a9cac2c1a817d9acdec143b653b9a80_5424	ac8fed72b32d7540cf9a1b9ac12df95a_2032	197b0243bc5bc4c380ecfb8919a026b1_5260	79ccbe49faa72747a800162f6a36c0ca_2431	614e29224da4f337b8899b3142d81070_6001	d977e7edc1a56720a787e465ab4ce472_6123	e653c257947c2dd0a414de7cb159ba14_6108	31e4ba73e5ddb8c85dea419204f0df5a_5435	752b3971131f3206662b5e22da3b23aa_1899	83683a6c7ca473684645e0830a47223d_6564	03da1bd30b32560bef8e38ea7761d9fe_5532	c648bd7c3a222aa51bed3e3836bcf8c8_290	B9T21_07600.p01	B9T15_00360.p01	B9T14_04665.p01	B9T11_06005.p01	B9T12_03675.p01	B9T18_00360.p01	B9T13_08675.p01	F387_01610.p01	A6V30_05575.p01
F387_01607		pilus assembly protein PilP	26	26	1	1	2755				353	593	583	B9T10_04765.p01	BMY_0787.p01	a04b031c37c06570dd644ef46d09ac8c_6163	2cf5bec40a3ef4476bf46f509f729c16_5859	102e21fe2bbcace64a7555dd0bcc9007_5377	4a9cac2c1a817d9acdec143b653b9a80_5412	ac8fed72b32d7540cf9a1b9ac12df95a_2044	197b0243bc5bc4c380ecfb8919a026b1_5272	79ccbe49faa72747a800162f6a36c0ca_2443	614e29224da4f337b8899b3142d81070_5989	d977e7edc1a56720a787e465ab4ce472_6111	e653c257947c2dd0a414de7cb159ba14_6096	31e4ba73e5ddb8c85dea419204f0df5a_5447	752b3971131f3206662b5e22da3b23aa_1887	83683a6c7ca473684645e0830a47223d_6576	03da1bd30b32560bef8e38ea7761d9fe_5544	c648bd7c3a222aa51bed3e3836bcf8c8_278	B9T21_07615.p01	B9T15_00345.p01	B9T14_04680.p01	B9T11_06020.p01	B9T12_03660.p01	B9T18_00345.p01	B9T13_08690.p01	F387_01607.p01	A6V30_05590.p01
pilM		type IV pilus assembly protein PilM	26	26	1	1	2751				971	1037	1034	B9T10_04780.p01	BMY_0791.p01	a04b031c37c06570dd644ef46d09ac8c_6175	2cf5bec40a3ef4476bf46f509f729c16_5849	102e21fe2bbcace64a7555dd0bcc9007_5365	4a9cac2c1a817d9acdec143b653b9a80_5400	ac8fed72b32d7540cf9a1b9ac12df95a_2056	197b0243bc5bc4c380ecfb8919a026b1_5284	79ccbe49faa72747a800162f6a36c0ca_2455	614e29224da4f337b8899b3142d81070_5977	d977e7edc1a56720a787e465ab4ce472_6099	e653c257947c2dd0a414de7cb159ba14_6084	31e4ba73e5ddb8c85dea419204f0df5a_5459	752b3971131f3206662b5e22da3b23aa_1875	83683a6c7ca473684645e0830a47223d_6588	03da1bd30b32560bef8e38ea7761d9fe_5556	c648bd7c3a222aa51bed3e3836bcf8c8_266	B9T21_07630.p01	B9T15_00330.p01	B9T14_04695.p01	B9T11_06035.p01	B9T12_03645.p01	B9T18_00330.p01	B9T13_08705.p01	F387_01604.p01	A6V30_05605.p01
rdgC		recombination-associated protein RdgC	26	26	1	1	2749				890	890	890	B9T10_04790.p01	BMY_0793.p01	a04b031c37c06570dd644ef46d09ac8c_6183	2cf5bec40a3ef4476bf46f509f729c16_5841	102e21fe2bbcace64a7555dd0bcc9007_5357	4a9cac2c1a817d9acdec143b653b9a80_5392	ac8fed72b32d7540cf9a1b9ac12df95a_2064	197b0243bc5bc4c380ecfb8919a026b1_5292	79ccbe49faa72747a800162f6a36c0ca_2463	614e29224da4f337b8899b3142d81070_5969	d977e7edc1a56720a787e465ab4ce472_6091	e653c257947c2dd0a414de7cb159ba14_6076	31e4ba73e5ddb8c85dea419204f0df5a_5467	752b3971131f3206662b5e22da3b23aa_1867	83683a6c7ca473684645e0830a47223d_6596	03da1bd30b32560bef8e38ea7761d9fe_5564	c648bd7c3a222aa51bed3e3836bcf8c8_258	B9T21_07640.p01	B9T15_00320.p01	B9T14_04705.p01	B9T11_06045.p01	B9T12_03635.p01	B9T18_00320.p01	B9T13_08715.p01	F387_01602.p01	A6V30_05615.p01
B9T11_06110		peptidylprolyl isomerase	26	26	1	1	2735				917	983	980	B9T10_04855.p01	BMY_0807.p01	a04b031c37c06570dd644ef46d09ac8c_6234	2cf5bec40a3ef4476bf46f509f729c16_5789	102e21fe2bbcace64a7555dd0bcc9007_5306	4a9cac2c1a817d9acdec143b653b9a80_5340	ac8fed72b32d7540cf9a1b9ac12df95a_2116	197b0243bc5bc4c380ecfb8919a026b1_5343	79ccbe49faa72747a800162f6a36c0ca_2515	614e29224da4f337b8899b3142d81070_5917	d977e7edc1a56720a787e465ab4ce472_6039	e653c257947c2dd0a414de7cb159ba14_6024	31e4ba73e5ddb8c85dea419204f0df5a_5519	752b3971131f3206662b5e22da3b23aa_1815	83683a6c7ca473684645e0830a47223d_6648	03da1bd30b32560bef8e38ea7761d9fe_5615	c648bd7c3a222aa51bed3e3836bcf8c8_206	B9T21_07705.p01	B9T15_00255.p01	B9T14_04770.p01	B9T11_06110.p01	B9T12_03570.p01	B9T18_00255.p01	B9T13_08780.p01	F387_01588.p01	A6V30_05680.p01
rsmA		16S rRNA (adenine(1518)-N(6)/adenine(1519)-N(6))- dimethyltransferase RsmA	26	26	1	1	2734				785	809	808	B9T10_04860.p01	BMY_0808.p01	a04b031c37c06570dd644ef46d09ac8c_6238	2cf5bec40a3ef4476bf46f509f729c16_5785	102e21fe2bbcace64a7555dd0bcc9007_5302	4a9cac2c1a817d9acdec143b653b9a80_5336	ac8fed72b32d7540cf9a1b9ac12df95a_2120	197b0243bc5bc4c380ecfb8919a026b1_5347	79ccbe49faa72747a800162f6a36c0ca_2519	614e29224da4f337b8899b3142d81070_5913	d977e7edc1a56720a787e465ab4ce472_6035	e653c257947c2dd0a414de7cb159ba14_6020	31e4ba73e5ddb8c85dea419204f0df5a_5523	752b3971131f3206662b5e22da3b23aa_1811	83683a6c7ca473684645e0830a47223d_6652	03da1bd30b32560bef8e38ea7761d9fe_5619	c648bd7c3a222aa51bed3e3836bcf8c8_202	B9T21_07710.p01	B9T15_00250.p01	B9T14_04775.p01	B9T11_06115.p01	B9T12_03565.p01	B9T18_00250.p01	B9T13_08785.p01	F387_01587.p01	A6V30_05685.p01
B9T10_04875		valine--tRNA ligase	26	26	1	1	2731				2642	2753	2748	B9T10_04875.p01	BMY_0811.p01	a04b031c37c06570dd644ef46d09ac8c_6250	2cf5bec40a3ef4476bf46f509f729c16_5773	102e21fe2bbcace64a7555dd0bcc9007_5290	4a9cac2c1a817d9acdec143b653b9a80_5324	ac8fed72b32d7540cf9a1b9ac12df95a_2132	197b0243bc5bc4c380ecfb8919a026b1_5359	79ccbe49faa72747a800162f6a36c0ca_2531	614e29224da4f337b8899b3142d81070_5901	d977e7edc1a56720a787e465ab4ce472_6023	e653c257947c2dd0a414de7cb159ba14_6008	31e4ba73e5ddb8c85dea419204f0df5a_5535	752b3971131f3206662b5e22da3b23aa_1799	83683a6c7ca473684645e0830a47223d_6664	03da1bd30b32560bef8e38ea7761d9fe_5631	c648bd7c3a222aa51bed3e3836bcf8c8_190	B9T21_07725.p01	B9T15_00235.p01	B9T14_04790.p01	B9T11_06130.p01	B9T12_03545.p01	B9T18_00235.p01	B9T13_08800.p01	F387_01584.p01	A6V30_05700.p01
J7600_07370		trans-2-enoyl-CoA reductase family protein	26	26	1	1	2718				839	1199	1185	B9T10_04940.p01	BMY_0825.p01	a04b031c37c06570dd644ef46d09ac8c_6299	2cf5bec40a3ef4476bf46f509f729c16_5724	102e21fe2bbcace64a7555dd0bcc9007_5241	4a9cac2c1a817d9acdec143b653b9a80_5275	ac8fed72b32d7540cf9a1b9ac12df95a_2185	197b0243bc5bc4c380ecfb8919a026b1_5408	79ccbe49faa72747a800162f6a36c0ca_2580	614e29224da4f337b8899b3142d81070_5853	d977e7edc1a56720a787e465ab4ce472_5974	e653c257947c2dd0a414de7cb159ba14_5959	31e4ba73e5ddb8c85dea419204f0df5a_5583	752b3971131f3206662b5e22da3b23aa_1750	83683a6c7ca473684645e0830a47223d_6712	03da1bd30b32560bef8e38ea7761d9fe_5680	c648bd7c3a222aa51bed3e3836bcf8c8_137	B9T21_07785.p01	B9T15_00175.p01	B9T14_04850.p01	B9T11_06190.p01	B9T12_03485.p01	B9T18_00170.p01	B9T13_08860.p01	F387_01571.p01	A6V30_05765.p01
J7561_06615		lytic transglycosylase domain-containing protein	26	26	1	1	2716				1130	1145	1130	B9T10_04950.p01	BMY_0828.p01	a04b031c37c06570dd644ef46d09ac8c_6307	2cf5bec40a3ef4476bf46f509f729c16_5716	102e21fe2bbcace64a7555dd0bcc9007_5233	4a9cac2c1a817d9acdec143b653b9a80_5267	ac8fed72b32d7540cf9a1b9ac12df95a_2193	197b0243bc5bc4c380ecfb8919a026b1_5416	79ccbe49faa72747a800162f6a36c0ca_2588	614e29224da4f337b8899b3142d81070_5845	d977e7edc1a56720a787e465ab4ce472_5966	e653c257947c2dd0a414de7cb159ba14_5951	31e4ba73e5ddb8c85dea419204f0df5a_5591	752b3971131f3206662b5e22da3b23aa_1742	83683a6c7ca473684645e0830a47223d_6720	03da1bd30b32560bef8e38ea7761d9fe_5688	c648bd7c3a222aa51bed3e3836bcf8c8_129	B9T21_07795.p01	B9T15_00165.p01	B9T14_04860.p01	B9T11_06200.p01	B9T12_03475.p01	B9T18_00160.p01	B9T13_08870.p01	F387_01569.p01	A6V30_05775.p01
ftsY		signal recognition particle-docking protein FtsY	26	26	1	1	2715				1337	1415	1412	B9T10_04955.p01	BMY_0829.p01	a04b031c37c06570dd644ef46d09ac8c_6311	2cf5bec40a3ef4476bf46f509f729c16_5712	102e21fe2bbcace64a7555dd0bcc9007_5229	4a9cac2c1a817d9acdec143b653b9a80_5263	ac8fed72b32d7540cf9a1b9ac12df95a_2197	197b0243bc5bc4c380ecfb8919a026b1_5420	79ccbe49faa72747a800162f6a36c0ca_2592	614e29224da4f337b8899b3142d81070_5841	d977e7edc1a56720a787e465ab4ce472_5962	e653c257947c2dd0a414de7cb159ba14_5947	31e4ba73e5ddb8c85dea419204f0df5a_5595	752b3971131f3206662b5e22da3b23aa_1738	83683a6c7ca473684645e0830a47223d_6724	03da1bd30b32560bef8e38ea7761d9fe_5692	c648bd7c3a222aa51bed3e3836bcf8c8_125	B9T21_07800.p01	B9T15_00160.p01	B9T14_04865.p01	B9T11_06205.p01	B9T12_03470.p01	B9T18_00155.p01	B9T13_08875.p01	F387_01568.p01	A6V30_05780.p01
mnmH		tRNA 2-selenouridine(34) synthase MnmH	26	26	1	1	2714				1109	1109	1109	B9T10_04960.p01	BMY_0830.p01	a04b031c37c06570dd644ef46d09ac8c_6315	2cf5bec40a3ef4476bf46f509f729c16_5708	102e21fe2bbcace64a7555dd0bcc9007_5225	4a9cac2c1a817d9acdec143b653b9a80_5259	ac8fed72b32d7540cf9a1b9ac12df95a_2201	197b0243bc5bc4c380ecfb8919a026b1_5424	79ccbe49faa72747a800162f6a36c0ca_2596	614e29224da4f337b8899b3142d81070_5837	d977e7edc1a56720a787e465ab4ce472_5958	e653c257947c2dd0a414de7cb159ba14_5943	31e4ba73e5ddb8c85dea419204f0df5a_5599	752b3971131f3206662b5e22da3b23aa_1734	83683a6c7ca473684645e0830a47223d_6728	03da1bd30b32560bef8e38ea7761d9fe_5696	c648bd7c3a222aa51bed3e3836bcf8c8_121	B9T21_07805.p01	B9T15_00155.p01	B9T14_04870.p01	B9T11_06210.p01	B9T12_03465.p01	B9T18_00150.p01	B9T13_08880.p01	F387_01567.p01	A6V30_05785.p01
BMY_0831		DUF4377 domain-containing protein	26	26	1	1	2713				659	659	659	B9T10_04965.p01	BMY_0831.p01	a04b031c37c06570dd644ef46d09ac8c_6319	2cf5bec40a3ef4476bf46f509f729c16_5704	102e21fe2bbcace64a7555dd0bcc9007_5221	4a9cac2c1a817d9acdec143b653b9a80_5255	ac8fed72b32d7540cf9a1b9ac12df95a_2205	197b0243bc5bc4c380ecfb8919a026b1_5428	79ccbe49faa72747a800162f6a36c0ca_2600	614e29224da4f337b8899b3142d81070_5833	d977e7edc1a56720a787e465ab4ce472_5954	e653c257947c2dd0a414de7cb159ba14_5939	31e4ba73e5ddb8c85dea419204f0df5a_5603	752b3971131f3206662b5e22da3b23aa_1730	83683a6c7ca473684645e0830a47223d_6732	03da1bd30b32560bef8e38ea7761d9fe_5700	c648bd7c3a222aa51bed3e3836bcf8c8_117	B9T21_07810.p01	B9T15_00150.p01	B9T14_04875.p01	B9T11_06215.p01	B9T12_03460.p01	B9T18_00145.p01	B9T13_08885.p01	F387_01566.p01	A6V30_05790.p01
J7607_09575		HAD hydrolase-like protein	26	26	1	1	2711				932	932	932	B9T10_04985.p01	BMY_0836.p01	a04b031c37c06570dd644ef46d09ac8c_7688	2cf5bec40a3ef4476bf46f509f729c16_7595	102e21fe2bbcace64a7555dd0bcc9007_7683	4a9cac2c1a817d9acdec143b653b9a80_7675	ac8fed72b32d7540cf9a1b9ac12df95a_7571	197b0243bc5bc4c380ecfb8919a026b1_7638	79ccbe49faa72747a800162f6a36c0ca_7394	614e29224da4f337b8899b3142d81070_7859	d977e7edc1a56720a787e465ab4ce472_7980	e653c257947c2dd0a414de7cb159ba14_7972	31e4ba73e5ddb8c85dea419204f0df5a_7601	752b3971131f3206662b5e22da3b23aa_7557	83683a6c7ca473684645e0830a47223d_6747	03da1bd30b32560bef8e38ea7761d9fe_7778	c648bd7c3a222aa51bed3e3836bcf8c8_102	B9T21_07830.p01	B9T15_00130.p01	B9T14_04895.p01	B9T11_06235.p01	B9T12_03440.p01	B9T18_00125.p01	B9T13_08905.p01	F387_01561.p01	A6V30_05815.p01
B9T13_08910		peptide chain release factor 3	26	26	1	1	2708				1517	1589	1586	B9T10_04990.p01	BMY_0837.p01	a04b031c37c06570dd644ef46d09ac8c_7692	2cf5bec40a3ef4476bf46f509f729c16_7591	102e21fe2bbcace64a7555dd0bcc9007_7679	4a9cac2c1a817d9acdec143b653b9a80_7672	ac8fed72b32d7540cf9a1b9ac12df95a_7575	197b0243bc5bc4c380ecfb8919a026b1_7642	79ccbe49faa72747a800162f6a36c0ca_7398	614e29224da4f337b8899b3142d81070_7855	d977e7edc1a56720a787e465ab4ce472_7976	e653c257947c2dd0a414de7cb159ba14_7968	31e4ba73e5ddb8c85dea419204f0df5a_7605	752b3971131f3206662b5e22da3b23aa_7553	83683a6c7ca473684645e0830a47223d_6751	03da1bd30b32560bef8e38ea7761d9fe_7782	c648bd7c3a222aa51bed3e3836bcf8c8_98	B9T21_07835.p01	B9T15_00125.p01	B9T14_04900.p01	B9T11_06240.p01	B9T12_03435.p01	B9T18_00120.p01	B9T13_08910.p01	F387_01560.p01	A6V30_05820.p01
pcnB		polynucleotide adenylyltransferase PcnB	26	26	1	1	2692				1139	1226	1222	B9T10_05060.p01	BMY_0853.p01	a04b031c37c06570dd644ef46d09ac8c_7750	2cf5bec40a3ef4476bf46f509f729c16_7532	102e21fe2bbcace64a7555dd0bcc9007_7620	4a9cac2c1a817d9acdec143b653b9a80_7612	ac8fed72b32d7540cf9a1b9ac12df95a_7635	197b0243bc5bc4c380ecfb8919a026b1_7701	79ccbe49faa72747a800162f6a36c0ca_7457	614e29224da4f337b8899b3142d81070_7796	d977e7edc1a56720a787e465ab4ce472_7917	e653c257947c2dd0a414de7cb159ba14_7908	31e4ba73e5ddb8c85dea419204f0df5a_7665	752b3971131f3206662b5e22da3b23aa_7495	83683a6c7ca473684645e0830a47223d_6810	03da1bd30b32560bef8e38ea7761d9fe_7841	c648bd7c3a222aa51bed3e3836bcf8c8_38	B9T21_07915.p01	B9T15_00055.p01	B9T14_04970.p01	B9T11_06310.p01	B9T12_03365.p01	B9T18_00050.p01	B9T13_08980.p01	F387_01545.p01	A6V30_05890.p01
B9T14_04985		FAD-dependent oxidoreductase	26	26	1	1	2689				1670	1733	1672	B9T10_05075.p01	BMY_0856.p01	a04b031c37c06570dd644ef46d09ac8c_7761	2cf5bec40a3ef4476bf46f509f729c16_7520	102e21fe2bbcace64a7555dd0bcc9007_7608	4a9cac2c1a817d9acdec143b653b9a80_7600	ac8fed72b32d7540cf9a1b9ac12df95a_7647	197b0243bc5bc4c380ecfb8919a026b1_7712	79ccbe49faa72747a800162f6a36c0ca_7469	614e29224da4f337b8899b3142d81070_7784	d977e7edc1a56720a787e465ab4ce472_7905	e653c257947c2dd0a414de7cb159ba14_7896	31e4ba73e5ddb8c85dea419204f0df5a_7677	752b3971131f3206662b5e22da3b23aa_7483	83683a6c7ca473684645e0830a47223d_6822	03da1bd30b32560bef8e38ea7761d9fe_7853	c648bd7c3a222aa51bed3e3836bcf8c8_26	B9T21_07930.p01	B9T15_00040.p01	B9T14_04985.p01	B9T11_06325.p01	B9T12_03350.p01	B9T18_00035.p01	B9T13_08995.p01	F387_01542.p01	A6V30_05905.p01
J7606_09940		aquaporin family protein	26	26	1	1	2687				791	830	828	B9T10_05085.p01	BMY_0858.p01	a04b031c37c06570dd644ef46d09ac8c_7769	2cf5bec40a3ef4476bf46f509f729c16_7512	102e21fe2bbcace64a7555dd0bcc9007_7600	4a9cac2c1a817d9acdec143b653b9a80_7592	ac8fed72b32d7540cf9a1b9ac12df95a_7655	197b0243bc5bc4c380ecfb8919a026b1_7720	79ccbe49faa72747a800162f6a36c0ca_7477	614e29224da4f337b8899b3142d81070_7776	d977e7edc1a56720a787e465ab4ce472_7897	e653c257947c2dd0a414de7cb159ba14_7888	31e4ba73e5ddb8c85dea419204f0df5a_7685	752b3971131f3206662b5e22da3b23aa_7475	83683a6c7ca473684645e0830a47223d_6830	03da1bd30b32560bef8e38ea7761d9fe_7861	c648bd7c3a222aa51bed3e3836bcf8c8_18	B9T21_07940.p01	B9T15_00030.p01	B9T14_04995.p01	B9T11_06335.p01	B9T12_03340.p01	B9T18_00025.p01	B9T13_09005.p01	F387_01540.p01	A6V30_05915.p01
J7554_05635		4'-phosphopantetheinyl transferase superfamily protein	26	26	1	1	139				677	677	677	B9T10_05125.p01	BMY_1375.p01	a04b031c37c06570dd644ef46d09ac8c_3967	2cf5bec40a3ef4476bf46f509f729c16_4005	102e21fe2bbcace64a7555dd0bcc9007_4471	4a9cac2c1a817d9acdec143b653b9a80_5237	ac8fed72b32d7540cf9a1b9ac12df95a_5983	197b0243bc5bc4c380ecfb8919a026b1_4158	79ccbe49faa72747a800162f6a36c0ca_4476	614e29224da4f337b8899b3142d81070_5172	d977e7edc1a56720a787e465ab4ce472_4531	e653c257947c2dd0a414de7cb159ba14_5271	31e4ba73e5ddb8c85dea419204f0df5a_5621	752b3971131f3206662b5e22da3b23aa_4550	83683a6c7ca473684645e0830a47223d_4841	03da1bd30b32560bef8e38ea7761d9fe_5245	c648bd7c3a222aa51bed3e3836bcf8c8_3466	B9T21_02890.p01	B9T15_05045.p01	B9T14_05030.p01	B9T11_04835.p01	B9T12_07845.p01	B9T18_07540.p01	B9T13_03620.p01	F387_01909.p01	A6V30_07390.p01
F387_01927		molybdenum cofactor biosynthesis protein MoaE	26	26	1	1	159				458	458	458	B9T10_05215.p01	BMY_1393.p01	a04b031c37c06570dd644ef46d09ac8c_3895	2cf5bec40a3ef4476bf46f509f729c16_4074	102e21fe2bbcace64a7555dd0bcc9007_4543	4a9cac2c1a817d9acdec143b653b9a80_5165	ac8fed72b32d7540cf9a1b9ac12df95a_5911	197b0243bc5bc4c380ecfb8919a026b1_4230	79ccbe49faa72747a800162f6a36c0ca_4548	614e29224da4f337b8899b3142d81070_5100	d977e7edc1a56720a787e465ab4ce472_4603	e653c257947c2dd0a414de7cb159ba14_5199	31e4ba73e5ddb8c85dea419204f0df5a_5692	752b3971131f3206662b5e22da3b23aa_4622	83683a6c7ca473684645e0830a47223d_4913	03da1bd30b32560bef8e38ea7761d9fe_5173	c648bd7c3a222aa51bed3e3836bcf8c8_3538	B9T21_02980.p01	B9T15_05135.p01	B9T14_05120.p01	B9T11_04745.p01	B9T12_07935.p01	B9T18_07450.p01	B9T13_03710.p01	F387_01927.p01	A6V30_07300.p01
atpB		F0F1 ATP synthase subunit A	26	26	1	1	166				761	815	810	B9T10_05250.p01	BMY_1400.p01	a04b031c37c06570dd644ef46d09ac8c_3867	2cf5bec40a3ef4476bf46f509f729c16_4101	102e21fe2bbcace64a7555dd0bcc9007_4571	4a9cac2c1a817d9acdec143b653b9a80_5137	ac8fed72b32d7540cf9a1b9ac12df95a_5883	197b0243bc5bc4c380ecfb8919a026b1_4258	79ccbe49faa72747a800162f6a36c0ca_4576	614e29224da4f337b8899b3142d81070_5072	d977e7edc1a56720a787e465ab4ce472_4631	e653c257947c2dd0a414de7cb159ba14_5171	31e4ba73e5ddb8c85dea419204f0df5a_5720	752b3971131f3206662b5e22da3b23aa_4650	83683a6c7ca473684645e0830a47223d_4941	03da1bd30b32560bef8e38ea7761d9fe_5145	c648bd7c3a222aa51bed3e3836bcf8c8_3566	B9T21_03015.p01	B9T15_05170.p01	B9T14_05155.p01	B9T11_04710.p01	B9T12_07970.p01	B9T18_07415.p01	B9T13_03745.p01	F387_01934.p01	A6V30_07265.p01
B9T11_04515		sodium:alanine symporter family protein	26	26	1	1	246				1244	1388	1382	B9T10_05440.p01	BMY_1442.p01	a04b031c37c06570dd644ef46d09ac8c_3716	2cf5bec40a3ef4476bf46f509f729c16_4260	102e21fe2bbcace64a7555dd0bcc9007_4729	4a9cac2c1a817d9acdec143b653b9a80_4978	ac8fed72b32d7540cf9a1b9ac12df95a_5730	197b0243bc5bc4c380ecfb8919a026b1_4457	79ccbe49faa72747a800162f6a36c0ca_4723	614e29224da4f337b8899b3142d81070_4921	d977e7edc1a56720a787e465ab4ce472_4781	e653c257947c2dd0a414de7cb159ba14_5020	31e4ba73e5ddb8c85dea419204f0df5a_5874	752b3971131f3206662b5e22da3b23aa_4804	83683a6c7ca473684645e0830a47223d_5091	03da1bd30b32560bef8e38ea7761d9fe_4996	c648bd7c3a222aa51bed3e3836bcf8c8_3721	B9T21_03210.p01	B9T15_05365.p01	B9T14_05350.p01	B9T11_04515.p01	B9T12_08165.p01	B9T18_07220.p01	B9T13_03940.p01	F387_01395.p01	A6V30_08065.p01
metG		methionine--tRNA ligase	26	26	1	1	248				2024	2099	2096	B9T10_05450.p01	BMY_1444.p01	a04b031c37c06570dd644ef46d09ac8c_3708	2cf5bec40a3ef4476bf46f509f729c16_4268	102e21fe2bbcace64a7555dd0bcc9007_4737	4a9cac2c1a817d9acdec143b653b9a80_4970	ac8fed72b32d7540cf9a1b9ac12df95a_5722	197b0243bc5bc4c380ecfb8919a026b1_4465	79ccbe49faa72747a800162f6a36c0ca_4731	614e29224da4f337b8899b3142d81070_4913	d977e7edc1a56720a787e465ab4ce472_4789	e653c257947c2dd0a414de7cb159ba14_5012	31e4ba73e5ddb8c85dea419204f0df5a_5882	752b3971131f3206662b5e22da3b23aa_4812	83683a6c7ca473684645e0830a47223d_5099	03da1bd30b32560bef8e38ea7761d9fe_4988	c648bd7c3a222aa51bed3e3836bcf8c8_3729	B9T21_03220.p01	B9T15_05375.p01	B9T14_05360.p01	B9T11_04505.p01	B9T12_08175.p01	B9T18_07210.p01	B9T13_03950.p01	F387_01397.p01	A6V30_08075.p01
ispF		2-C-methyl-D-erythritol 2,4-cyclodiphosphate synthase	26	26	1	1	249				479	479	479	B9T10_05455.p01	BMY_1445.p01	a04b031c37c06570dd644ef46d09ac8c_3704	2cf5bec40a3ef4476bf46f509f729c16_4272	102e21fe2bbcace64a7555dd0bcc9007_4741	4a9cac2c1a817d9acdec143b653b9a80_4966	ac8fed72b32d7540cf9a1b9ac12df95a_5718	197b0243bc5bc4c380ecfb8919a026b1_4468	79ccbe49faa72747a800162f6a36c0ca_4735	614e29224da4f337b8899b3142d81070_4909	d977e7edc1a56720a787e465ab4ce472_4793	e653c257947c2dd0a414de7cb159ba14_5008	31e4ba73e5ddb8c85dea419204f0df5a_5886	752b3971131f3206662b5e22da3b23aa_4816	83683a6c7ca473684645e0830a47223d_5103	03da1bd30b32560bef8e38ea7761d9fe_4984	c648bd7c3a222aa51bed3e3836bcf8c8_3733	B9T21_03225.p01	B9T15_05380.p01	B9T14_05365.p01	B9T11_04500.p01	B9T12_08180.p01	B9T18_07205.p01	B9T13_03955.p01	F387_01398.p01	A6V30_08080.p01
J7622_06470		DUF493 domain-containing protein	26	26	1	1	257				275	275	275	B9T10_05495.p01	BMY_1453.p01	a04b031c37c06570dd644ef46d09ac8c_3672	2cf5bec40a3ef4476bf46f509f729c16_4304	102e21fe2bbcace64a7555dd0bcc9007_4773	4a9cac2c1a817d9acdec143b653b9a80_4934	ac8fed72b32d7540cf9a1b9ac12df95a_5686	197b0243bc5bc4c380ecfb8919a026b1_4500	79ccbe49faa72747a800162f6a36c0ca_4767	614e29224da4f337b8899b3142d81070_4877	d977e7edc1a56720a787e465ab4ce472_4823	e653c257947c2dd0a414de7cb159ba14_4978	31e4ba73e5ddb8c85dea419204f0df5a_5918	752b3971131f3206662b5e22da3b23aa_4848	83683a6c7ca473684645e0830a47223d_5135	03da1bd30b32560bef8e38ea7761d9fe_4952	c648bd7c3a222aa51bed3e3836bcf8c8_3765	B9T21_03265.p01	B9T15_05420.p01	B9T14_05405.p01	B9T11_04460.p01	B9T12_08220.p01	B9T18_07165.p01	B9T13_03995.p01	F387_01406.p01	A6V30_08120.p01
minC		septum site-determining protein MinC	26	26	1	1	265				740	740	740	B9T10_05535.p01	BMY_1461.p01	a04b031c37c06570dd644ef46d09ac8c_3640	2cf5bec40a3ef4476bf46f509f729c16_4336	102e21fe2bbcace64a7555dd0bcc9007_4805	4a9cac2c1a817d9acdec143b653b9a80_4902	ac8fed72b32d7540cf9a1b9ac12df95a_5654	197b0243bc5bc4c380ecfb8919a026b1_4532	79ccbe49faa72747a800162f6a36c0ca_4799	614e29224da4f337b8899b3142d81070_4845	d977e7edc1a56720a787e465ab4ce472_4855	e653c257947c2dd0a414de7cb159ba14_4946	31e4ba73e5ddb8c85dea419204f0df5a_5950	752b3971131f3206662b5e22da3b23aa_4880	83683a6c7ca473684645e0830a47223d_5166	03da1bd30b32560bef8e38ea7761d9fe_4920	c648bd7c3a222aa51bed3e3836bcf8c8_3797	B9T21_03305.p01	B9T15_05460.p01	B9T14_05445.p01	B9T11_04420.p01	B9T12_08260.p01	B9T18_07125.p01	B9T13_04035.p01	F387_01414.p01	A6V30_08160.p01
B9T13_04070		hypothetical protein	26	26	1	1	272				842	842	842	B9T10_05570.p01	BMY_1468.p01	a04b031c37c06570dd644ef46d09ac8c_3612	2cf5bec40a3ef4476bf46f509f729c16_4364	102e21fe2bbcace64a7555dd0bcc9007_4833	4a9cac2c1a817d9acdec143b653b9a80_4874	ac8fed72b32d7540cf9a1b9ac12df95a_5627	197b0243bc5bc4c380ecfb8919a026b1_4560	79ccbe49faa72747a800162f6a36c0ca_4827	614e29224da4f337b8899b3142d81070_4817	d977e7edc1a56720a787e465ab4ce472_4883	e653c257947c2dd0a414de7cb159ba14_4918	31e4ba73e5ddb8c85dea419204f0df5a_5978	752b3971131f3206662b5e22da3b23aa_4908	83683a6c7ca473684645e0830a47223d_5194	03da1bd30b32560bef8e38ea7761d9fe_4892	c648bd7c3a222aa51bed3e3836bcf8c8_3825	B9T21_03340.p01	B9T15_05495.p01	B9T14_05480.p01	B9T11_04385.p01	B9T12_08295.p01	B9T18_07090.p01	B9T13_04070.p01	F387_01421.p01	A6V30_08195.p01
J7554_06080		sel1 repeat family protein	26	26	1	1	273				986	986	986	B9T10_05575.p01	BMY_1469.p01	a04b031c37c06570dd644ef46d09ac8c_3608	2cf5bec40a3ef4476bf46f509f729c16_4368	102e21fe2bbcace64a7555dd0bcc9007_4837	4a9cac2c1a817d9acdec143b653b9a80_4870	ac8fed72b32d7540cf9a1b9ac12df95a_5623	197b0243bc5bc4c380ecfb8919a026b1_4564	79ccbe49faa72747a800162f6a36c0ca_4831	614e29224da4f337b8899b3142d81070_4813	d977e7edc1a56720a787e465ab4ce472_4887	e653c257947c2dd0a414de7cb159ba14_4914	31e4ba73e5ddb8c85dea419204f0df5a_5982	752b3971131f3206662b5e22da3b23aa_4912	83683a6c7ca473684645e0830a47223d_5198	03da1bd30b32560bef8e38ea7761d9fe_4888	c648bd7c3a222aa51bed3e3836bcf8c8_3829	B9T21_03345.p01	B9T15_05500.p01	B9T14_05485.p01	B9T11_04380.p01	B9T12_08300.p01	B9T18_07085.p01	B9T13_04075.p01	F387_01422.p01	A6V30_08200.p01
coaBC		bifunctional phosphopantothenoylcysteine decarboxylase/phosphopantothenate--cysteine ligase CoaBC	26	26	1	1	3736				638	1202	1179	B9T10_05930.p01	BMY_1536.p01	a04b031c37c06570dd644ef46d09ac8c_3354	2cf5bec40a3ef4476bf46f509f729c16_4605	102e21fe2bbcace64a7555dd0bcc9007_5100	4a9cac2c1a817d9acdec143b653b9a80_4607	ac8fed72b32d7540cf9a1b9ac12df95a_6774	197b0243bc5bc4c380ecfb8919a026b1_4830	79ccbe49faa72747a800162f6a36c0ca_5146	614e29224da4f337b8899b3142d81070_4519	d977e7edc1a56720a787e465ab4ce472_5182	e653c257947c2dd0a414de7cb159ba14_4620	31e4ba73e5ddb8c85dea419204f0df5a_7334	752b3971131f3206662b5e22da3b23aa_5211	83683a6c7ca473684645e0830a47223d_5493	03da1bd30b32560bef8e38ea7761d9fe_4650	c648bd7c3a222aa51bed3e3836bcf8c8_4108	B9T21_03670.p01	B9T15_05800.p01	B9T14_05770.p01	B9T11_04085.p01	B9T12_06650.p01	B9T18_06760.p01	B9T13_04420.p01	F387_01482.p01	A6V30_08640.p01
J7547_06095		OmpA family protein	26	26	1	1	276				461	518	515	B9T10_05595.p01	BMY_1472.p01	a04b031c37c06570dd644ef46d09ac8c_3593	2cf5bec40a3ef4476bf46f509f729c16_4382	102e21fe2bbcace64a7555dd0bcc9007_4852	4a9cac2c1a817d9acdec143b653b9a80_4855	ac8fed72b32d7540cf9a1b9ac12df95a_5608	197b0243bc5bc4c380ecfb8919a026b1_4579	79ccbe49faa72747a800162f6a36c0ca_4846	614e29224da4f337b8899b3142d81070_4798	d977e7edc1a56720a787e465ab4ce472_4902	e653c257947c2dd0a414de7cb159ba14_4899	31e4ba73e5ddb8c85dea419204f0df5a_5996	752b3971131f3206662b5e22da3b23aa_4927	83683a6c7ca473684645e0830a47223d_5213	03da1bd30b32560bef8e38ea7761d9fe_4873	c648bd7c3a222aa51bed3e3836bcf8c8_3844	B9T21_03365.p01	B9T15_05520.p01	B9T14_05505.p01	B9T11_04360.p01	B9T12_08320.p01	B9T18_07065.p01	B9T13_04095.p01	F387_01425.p01	A6V30_08220.p01
pal		peptidoglycan-associated lipoprotein Pal	26	26	1	1	278				497	521	520	B9T10_05605.p01	BMY_1474.p01	a04b031c37c06570dd644ef46d09ac8c_3585	2cf5bec40a3ef4476bf46f509f729c16_4390	102e21fe2bbcace64a7555dd0bcc9007_4860	4a9cac2c1a817d9acdec143b653b9a80_4847	ac8fed72b32d7540cf9a1b9ac12df95a_5600	197b0243bc5bc4c380ecfb8919a026b1_4587	79ccbe49faa72747a800162f6a36c0ca_4854	614e29224da4f337b8899b3142d81070_4790	d977e7edc1a56720a787e465ab4ce472_4910	e653c257947c2dd0a414de7cb159ba14_4891	31e4ba73e5ddb8c85dea419204f0df5a_6003	752b3971131f3206662b5e22da3b23aa_4935	83683a6c7ca473684645e0830a47223d_5221	03da1bd30b32560bef8e38ea7761d9fe_4865	c648bd7c3a222aa51bed3e3836bcf8c8_3852	B9T21_03375.p01	B9T15_05530.p01	B9T14_05515.p01	B9T11_04350.p01	B9T12_08330.p01	B9T18_07055.p01	B9T13_04105.p01	F387_01427.p01	A6V30_08230.p01
B9T12_08340		hypoxanthine-guanine phosphoribosyltransferase	26	26	1	1	280				554	554	554	B9T10_05615.p01	BMY_1476.p01	a04b031c37c06570dd644ef46d09ac8c_3577	2cf5bec40a3ef4476bf46f509f729c16_4397	102e21fe2bbcace64a7555dd0bcc9007_4868	4a9cac2c1a817d9acdec143b653b9a80_4839	ac8fed72b32d7540cf9a1b9ac12df95a_5592	197b0243bc5bc4c380ecfb8919a026b1_4595	79ccbe49faa72747a800162f6a36c0ca_4862	614e29224da4f337b8899b3142d81070_4782	d977e7edc1a56720a787e465ab4ce472_4918	e653c257947c2dd0a414de7cb159ba14_4883	31e4ba73e5ddb8c85dea419204f0df5a_6011	752b3971131f3206662b5e22da3b23aa_4943	83683a6c7ca473684645e0830a47223d_5229	03da1bd30b32560bef8e38ea7761d9fe_4857	c648bd7c3a222aa51bed3e3836bcf8c8_3860	B9T21_03385.p01	B9T15_05540.p01	B9T14_05525.p01	B9T11_04340.p01	B9T12_08340.p01	B9T18_07045.p01	B9T13_04115.p01	F387_01429.p01	A6V30_08240.p01
B9T10_05620		glutamyl-tRNA reductase	26	26	1	1	282				1208	1277	1271	B9T10_05620.p01	BMY_1477.p01	a04b031c37c06570dd644ef46d09ac8c_3573	2cf5bec40a3ef4476bf46f509f729c16_4401	102e21fe2bbcace64a7555dd0bcc9007_4872	4a9cac2c1a817d9acdec143b653b9a80_4835	ac8fed72b32d7540cf9a1b9ac12df95a_5588	197b0243bc5bc4c380ecfb8919a026b1_4599	79ccbe49faa72747a800162f6a36c0ca_4866	614e29224da4f337b8899b3142d81070_4778	d977e7edc1a56720a787e465ab4ce472_4922	e653c257947c2dd0a414de7cb159ba14_4879	31e4ba73e5ddb8c85dea419204f0df5a_6015	752b3971131f3206662b5e22da3b23aa_4947	83683a6c7ca473684645e0830a47223d_5233	03da1bd30b32560bef8e38ea7761d9fe_4853	c648bd7c3a222aa51bed3e3836bcf8c8_3864	B9T21_03390.p01	B9T15_05545.p01	B9T14_05530.p01	B9T11_04335.p01	B9T12_08345.p01	B9T18_07040.p01	B9T13_04120.p01	F387_01430.p01	A6V30_08245.p01
orn		oligoribonuclease	26	26	1	1	288				503	542	540	B9T10_05650.p01	BMY_1483.p01	a04b031c37c06570dd644ef46d09ac8c_3549	2cf5bec40a3ef4476bf46f509f729c16_4425	102e21fe2bbcace64a7555dd0bcc9007_4896	4a9cac2c1a817d9acdec143b653b9a80_4811	ac8fed72b32d7540cf9a1b9ac12df95a_5564	197b0243bc5bc4c380ecfb8919a026b1_4623	79ccbe49faa72747a800162f6a36c0ca_4890	614e29224da4f337b8899b3142d81070_4754	d977e7edc1a56720a787e465ab4ce472_4946	e653c257947c2dd0a414de7cb159ba14_4855	31e4ba73e5ddb8c85dea419204f0df5a_6039	752b3971131f3206662b5e22da3b23aa_4971	83683a6c7ca473684645e0830a47223d_5257	03da1bd30b32560bef8e38ea7761d9fe_4829	c648bd7c3a222aa51bed3e3836bcf8c8_3888	B9T21_03420.p01	B9T15_05575.p01	B9T14_05560.p01	B9T11_04305.p01	B9T12_08375.p01	B9T18_07010.p01	B9T13_04150.p01	F387_01437.p01	A6V30_08275.p01
J7606_05905		4-hydroxy-tetrahydrodipicolinate synthase	26	26	1	1	3754				836	872	867	B9T10_05850.p01	BMY_1518.p01	a04b031c37c06570dd644ef46d09ac8c_3418	2cf5bec40a3ef4476bf46f509f729c16_4541	102e21fe2bbcace64a7555dd0bcc9007_5036	4a9cac2c1a817d9acdec143b653b9a80_4671	ac8fed72b32d7540cf9a1b9ac12df95a_6837	197b0243bc5bc4c380ecfb8919a026b1_4766	79ccbe49faa72747a800162f6a36c0ca_5082	614e29224da4f337b8899b3142d81070_4583	d977e7edc1a56720a787e465ab4ce472_5118	e653c257947c2dd0a414de7cb159ba14_4683	31e4ba73e5ddb8c85dea419204f0df5a_7271	752b3971131f3206662b5e22da3b23aa_5147	83683a6c7ca473684645e0830a47223d_5429	03da1bd30b32560bef8e38ea7761d9fe_4714	c648bd7c3a222aa51bed3e3836bcf8c8_4044	B9T21_03590.p01	B9T15_05720.p01	B9T14_05690.p01	B9T11_04165.p01	B9T12_06570.p01	B9T18_06840.p01	B9T13_04340.p01	F387_01466.p01	A6V30_08560.p01
bamC		outer membrane protein assembly factor BamC	26	26	1	1	3753				956	1046	1042	B9T10_05855.p01	BMY_1519.p01	a04b031c37c06570dd644ef46d09ac8c_3414	2cf5bec40a3ef4476bf46f509f729c16_4545	102e21fe2bbcace64a7555dd0bcc9007_5040	4a9cac2c1a817d9acdec143b653b9a80_4667	ac8fed72b32d7540cf9a1b9ac12df95a_6833	197b0243bc5bc4c380ecfb8919a026b1_4770	79ccbe49faa72747a800162f6a36c0ca_5086	614e29224da4f337b8899b3142d81070_4579	d977e7edc1a56720a787e465ab4ce472_5122	e653c257947c2dd0a414de7cb159ba14_4679	31e4ba73e5ddb8c85dea419204f0df5a_7275	752b3971131f3206662b5e22da3b23aa_5151	83683a6c7ca473684645e0830a47223d_5433	03da1bd30b32560bef8e38ea7761d9fe_4710	c648bd7c3a222aa51bed3e3836bcf8c8_4048	B9T21_03595.p01	B9T15_05725.p01	B9T14_05695.p01	B9T11_04160.p01	B9T12_06575.p01	B9T18_06835.p01	B9T13_04345.p01	F387_01467.p01	A6V30_08565.p01
B9T12_06640		phosphoglycerate kinase	26	26	1	1	3739				791	1175	1160	B9T10_05920.p01	BMY_1533.p01	a04b031c37c06570dd644ef46d09ac8c_3362	2cf5bec40a3ef4476bf46f509f729c16_4597	102e21fe2bbcace64a7555dd0bcc9007_5092	4a9cac2c1a817d9acdec143b653b9a80_4615	ac8fed72b32d7540cf9a1b9ac12df95a_6782	197b0243bc5bc4c380ecfb8919a026b1_4822	79ccbe49faa72747a800162f6a36c0ca_5138	614e29224da4f337b8899b3142d81070_4527	d977e7edc1a56720a787e465ab4ce472_5174	e653c257947c2dd0a414de7cb159ba14_4628	31e4ba73e5ddb8c85dea419204f0df5a_7326	752b3971131f3206662b5e22da3b23aa_5203	83683a6c7ca473684645e0830a47223d_5485	03da1bd30b32560bef8e38ea7761d9fe_4658	c648bd7c3a222aa51bed3e3836bcf8c8_4100	B9T21_03660.p01	B9T15_05790.p01	B9T14_05760.p01	B9T11_04095.p01	B9T12_06640.p01	B9T18_06770.p01	B9T13_04410.p01	F387_01480.p01	A6V30_08630.p01
J7600_05685		NAD(P)-dependent glycerol-3-phosphate dehydrogenase	26	26	1	1	3733				980	980	980	B9T10_05940.p01	BMY_1538.p01	a04b031c37c06570dd644ef46d09ac8c_3346	2cf5bec40a3ef4476bf46f509f729c16_4613	102e21fe2bbcace64a7555dd0bcc9007_5108	4a9cac2c1a817d9acdec143b653b9a80_4599	ac8fed72b32d7540cf9a1b9ac12df95a_6766	197b0243bc5bc4c380ecfb8919a026b1_4838	79ccbe49faa72747a800162f6a36c0ca_5154	614e29224da4f337b8899b3142d81070_4511	d977e7edc1a56720a787e465ab4ce472_5190	e653c257947c2dd0a414de7cb159ba14_4612	31e4ba73e5ddb8c85dea419204f0df5a_7341	752b3971131f3206662b5e22da3b23aa_5219	83683a6c7ca473684645e0830a47223d_5501	03da1bd30b32560bef8e38ea7761d9fe_4642	c648bd7c3a222aa51bed3e3836bcf8c8_4116	B9T21_03680.p01	B9T15_05810.p01	B9T14_05780.p01	B9T11_04075.p01	B9T12_06660.p01	B9T18_06750.p01	B9T13_04430.p01	F387_01484.p01	A6V30_08650.p01
cls		cardiolipin synthase	26	26	1	1	3725				1406	1478	1475	B9T10_05980.p01	BMY_1547.p01	a04b031c37c06570dd644ef46d09ac8c_3314	2cf5bec40a3ef4476bf46f509f729c16_4645	102e21fe2bbcace64a7555dd0bcc9007_5140	4a9cac2c1a817d9acdec143b653b9a80_4567	ac8fed72b32d7540cf9a1b9ac12df95a_6734	197b0243bc5bc4c380ecfb8919a026b1_4870	79ccbe49faa72747a800162f6a36c0ca_5185	614e29224da4f337b8899b3142d81070_4479	d977e7edc1a56720a787e465ab4ce472_5222	e653c257947c2dd0a414de7cb159ba14_4580	31e4ba73e5ddb8c85dea419204f0df5a_7373	752b3971131f3206662b5e22da3b23aa_5251	83683a6c7ca473684645e0830a47223d_5533	03da1bd30b32560bef8e38ea7761d9fe_4610	c648bd7c3a222aa51bed3e3836bcf8c8_4148	B9T21_03720.p01	B9T15_05850.p01	B9T14_05820.p01	B9T11_04035.p01	B9T12_06700.p01	B9T18_06710.p01	B9T13_04470.p01	F387_01492.p01	A6V30_08690.p01
F387_01501		nicotinamide mononucleotide transporter	26	26	1	1	3715				602	602	602	B9T10_06010.p01	BMY_1553.p01	a04b031c37c06570dd644ef46d09ac8c_3286	2cf5bec40a3ef4476bf46f509f729c16_4669	102e21fe2bbcace64a7555dd0bcc9007_5168	4a9cac2c1a817d9acdec143b653b9a80_4539	ac8fed72b32d7540cf9a1b9ac12df95a_6707	197b0243bc5bc4c380ecfb8919a026b1_4898	79ccbe49faa72747a800162f6a36c0ca_5209	614e29224da4f337b8899b3142d81070_4451	d977e7edc1a56720a787e465ab4ce472_5250	e653c257947c2dd0a414de7cb159ba14_4552	31e4ba73e5ddb8c85dea419204f0df5a_7397	752b3971131f3206662b5e22da3b23aa_5279	83683a6c7ca473684645e0830a47223d_5560	03da1bd30b32560bef8e38ea7761d9fe_4582	c648bd7c3a222aa51bed3e3836bcf8c8_4176	B9T21_03750.p01	B9T15_05885.p01	B9T14_05855.p01	B9T11_04000.p01	B9T12_06730.p01	B9T18_06680.p01	B9T13_04505.p01	F387_01501.p01	A6V30_08720.p01
B9T21_03755		hypothetical protein	26	26	1	1	3714				647	767	651	B9T10_06015.p01	BMY_1554.p01	a04b031c37c06570dd644ef46d09ac8c_3282	2cf5bec40a3ef4476bf46f509f729c16_4673	102e21fe2bbcace64a7555dd0bcc9007_5172	4a9cac2c1a817d9acdec143b653b9a80_4535	ac8fed72b32d7540cf9a1b9ac12df95a_6703	197b0243bc5bc4c380ecfb8919a026b1_4902	79ccbe49faa72747a800162f6a36c0ca_5213	614e29224da4f337b8899b3142d81070_4447	d977e7edc1a56720a787e465ab4ce472_5254	e653c257947c2dd0a414de7cb159ba14_4548	31e4ba73e5ddb8c85dea419204f0df5a_7401	752b3971131f3206662b5e22da3b23aa_5283	83683a6c7ca473684645e0830a47223d_5564	03da1bd30b32560bef8e38ea7761d9fe_4578	c648bd7c3a222aa51bed3e3836bcf8c8_4180	B9T21_03755.p01	B9T15_05890.p01	B9T14_05860.p01	B9T11_03995.p01	B9T12_06735.p01	B9T18_06675.p01	B9T13_04510.p01	F387_01502.p01	A6V30_08725.p01
J7558_04120		DUF975 family protein	26	26	1	1	3713				677	677	677	B9T10_06020.p01	BMY_1555.p01	a04b031c37c06570dd644ef46d09ac8c_3278	2cf5bec40a3ef4476bf46f509f729c16_4677	102e21fe2bbcace64a7555dd0bcc9007_5176	4a9cac2c1a817d9acdec143b653b9a80_4531	ac8fed72b32d7540cf9a1b9ac12df95a_6700	197b0243bc5bc4c380ecfb8919a026b1_4906	79ccbe49faa72747a800162f6a36c0ca_5217	614e29224da4f337b8899b3142d81070_4443	d977e7edc1a56720a787e465ab4ce472_5258	e653c257947c2dd0a414de7cb159ba14_4544	31e4ba73e5ddb8c85dea419204f0df5a_7405	752b3971131f3206662b5e22da3b23aa_5287	83683a6c7ca473684645e0830a47223d_5568	03da1bd30b32560bef8e38ea7761d9fe_4574	c648bd7c3a222aa51bed3e3836bcf8c8_4184	B9T21_03760.p01	B9T15_05895.p01	B9T14_05865.p01	B9T11_03990.p01	B9T12_06740.p01	B9T18_06670.p01	B9T13_04515.p01	F387_01503.p01	A6V30_08730.p01
J7606_05725		bile acid:sodium symporter family protein	26	26	1	1	3712				971	1052	974	B9T10_06025.p01	BMY_1556.p01	a04b031c37c06570dd644ef46d09ac8c_3274	2cf5bec40a3ef4476bf46f509f729c16_4681	102e21fe2bbcace64a7555dd0bcc9007_5180	4a9cac2c1a817d9acdec143b653b9a80_4527	ac8fed72b32d7540cf9a1b9ac12df95a_6696	197b0243bc5bc4c380ecfb8919a026b1_4910	79ccbe49faa72747a800162f6a36c0ca_5221	614e29224da4f337b8899b3142d81070_4439	d977e7edc1a56720a787e465ab4ce472_5262	e653c257947c2dd0a414de7cb159ba14_4540	31e4ba73e5ddb8c85dea419204f0df5a_7409	752b3971131f3206662b5e22da3b23aa_5291	83683a6c7ca473684645e0830a47223d_5572	03da1bd30b32560bef8e38ea7761d9fe_4570	c648bd7c3a222aa51bed3e3836bcf8c8_4188	B9T21_03765.p01	B9T15_05900.p01	B9T14_05870.p01	B9T11_03985.p01	B9T12_06745.p01	B9T18_06665.p01	B9T13_04520.p01	F387_01504.p01	A6V30_08735.p01
J7602_06655		amino acid permease	26	26	1	1	3707				1304	1355	1307	B9T10_06050.p01	BMY_1561.p01	a04b031c37c06570dd644ef46d09ac8c_3254	2cf5bec40a3ef4476bf46f509f729c16_4701	102e21fe2bbcace64a7555dd0bcc9007_5200	4a9cac2c1a817d9acdec143b653b9a80_4507	ac8fed72b32d7540cf9a1b9ac12df95a_6676	197b0243bc5bc4c380ecfb8919a026b1_4930	79ccbe49faa72747a800162f6a36c0ca_5241	614e29224da4f337b8899b3142d81070_4419	d977e7edc1a56720a787e465ab4ce472_5282	e653c257947c2dd0a414de7cb159ba14_4520	31e4ba73e5ddb8c85dea419204f0df5a_7429	752b3971131f3206662b5e22da3b23aa_5311	83683a6c7ca473684645e0830a47223d_5592	03da1bd30b32560bef8e38ea7761d9fe_4550	c648bd7c3a222aa51bed3e3836bcf8c8_4208	B9T21_03790.p01	B9T15_05925.p01	B9T14_05895.p01	B9T11_03960.p01	B9T12_06770.p01	B9T18_06640.p01	B9T13_04545.p01	F387_01509.p01	A6V30_08760.p01
selB		selenocysteine-specific translation elongation factor	26	26	1	1	3702				1793	1793	1793	B9T10_06085.p01	BMY_1568.p01	a04b031c37c06570dd644ef46d09ac8c_3228	2cf5bec40a3ef4476bf46f509f729c16_2332	102e21fe2bbcace64a7555dd0bcc9007_2886	4a9cac2c1a817d9acdec143b653b9a80_4481	ac8fed72b32d7540cf9a1b9ac12df95a_4070	197b0243bc5bc4c380ecfb8919a026b1_2378	79ccbe49faa72747a800162f6a36c0ca_3578	614e29224da4f337b8899b3142d81070_4393	d977e7edc1a56720a787e465ab4ce472_2384	e653c257947c2dd0a414de7cb159ba14_3449	31e4ba73e5ddb8c85dea419204f0df5a_3432	752b3971131f3206662b5e22da3b23aa_3682	83683a6c7ca473684645e0830a47223d_2694	03da1bd30b32560bef8e38ea7761d9fe_3785	c648bd7c3a222aa51bed3e3836bcf8c8_4234	B9T21_03825.p01	B9T15_05960.p01	B9T14_05930.p01	B9T11_03925.p01	B9T12_06805.p01	B9T18_06605.p01	B9T13_04580.p01	F387_01517.p01	A6V30_08795.p01
selA		L-seryl-tRNA(Sec) selenium transferase	26	26	1	1	3701				1343	1343	1343	B9T10_06090.p01	BMY_1569.p01	a04b031c37c06570dd644ef46d09ac8c_3224	2cf5bec40a3ef4476bf46f509f729c16_2336	102e21fe2bbcace64a7555dd0bcc9007_2890	4a9cac2c1a817d9acdec143b653b9a80_4477	ac8fed72b32d7540cf9a1b9ac12df95a_4066	197b0243bc5bc4c380ecfb8919a026b1_2382	79ccbe49faa72747a800162f6a36c0ca_3582	614e29224da4f337b8899b3142d81070_4389	d977e7edc1a56720a787e465ab4ce472_2388	e653c257947c2dd0a414de7cb159ba14_3445	31e4ba73e5ddb8c85dea419204f0df5a_3436	752b3971131f3206662b5e22da3b23aa_3686	83683a6c7ca473684645e0830a47223d_2698	03da1bd30b32560bef8e38ea7761d9fe_3781	c648bd7c3a222aa51bed3e3836bcf8c8_4238	B9T21_03830.p01	B9T15_05965.p01	B9T14_05935.p01	B9T11_03920.p01	B9T12_06810.p01	B9T18_06600.p01	B9T13_04585.p01	F387_01518.p01	A6V30_08800.p01
B9T13_04650		multidrug effflux MFS transporter	26	26	1	1	3698				1202	1235	1203	B9T10_06100.p01	BMY_1571.p01	a04b031c37c06570dd644ef46d09ac8c_3213	2cf5bec40a3ef4476bf46f509f729c16_2347	102e21fe2bbcace64a7555dd0bcc9007_2901	4a9cac2c1a817d9acdec143b653b9a80_4466	ac8fed72b32d7540cf9a1b9ac12df95a_4055	197b0243bc5bc4c380ecfb8919a026b1_2401	79ccbe49faa72747a800162f6a36c0ca_3625	614e29224da4f337b8899b3142d81070_4378	d977e7edc1a56720a787e465ab4ce472_2399	e653c257947c2dd0a414de7cb159ba14_3434	31e4ba73e5ddb8c85dea419204f0df5a_3447	752b3971131f3206662b5e22da3b23aa_3697	83683a6c7ca473684645e0830a47223d_2709	03da1bd30b32560bef8e38ea7761d9fe_3770	c648bd7c3a222aa51bed3e3836bcf8c8_4249	B9T21_03840.p01	B9T15_05975.p01	B9T14_05945.p01	B9T11_03910.p01	B9T12_06820.p01	B9T18_06590.p01	B9T13_04650.p01	F387_01526.p01	A6V30_08810.p01
rpsL		30S ribosomal protein S12	26	26	1	1	3688				212	374	367	B9T10_06135.p01	BMY_1579.p01	a04b031c37c06570dd644ef46d09ac8c_3185	2cf5bec40a3ef4476bf46f509f729c16_2375	102e21fe2bbcace64a7555dd0bcc9007_2929	4a9cac2c1a817d9acdec143b653b9a80_4438	ac8fed72b32d7540cf9a1b9ac12df95a_4027	197b0243bc5bc4c380ecfb8919a026b1_2429	79ccbe49faa72747a800162f6a36c0ca_3653	614e29224da4f337b8899b3142d81070_4350	d977e7edc1a56720a787e465ab4ce472_2427	e653c257947c2dd0a414de7cb159ba14_3406	31e4ba73e5ddb8c85dea419204f0df5a_3475	752b3971131f3206662b5e22da3b23aa_3725	83683a6c7ca473684645e0830a47223d_2737	03da1bd30b32560bef8e38ea7761d9fe_3742	c648bd7c3a222aa51bed3e3836bcf8c8_4277	B9T21_03875.p01	B9T15_06010.p01	B9T14_05980.p01	B9T11_03875.p01	B9T12_06855.p01	B9T18_06555.p01	B9T13_04685.p01	F387_01533.p01	A6V30_08845.p01
rpsG		30S ribosomal protein S7	26	26	1	1	3687				380	470	466	B9T10_06140.p01	BMY_1580.p01	a04b031c37c06570dd644ef46d09ac8c_3181	2cf5bec40a3ef4476bf46f509f729c16_2379	102e21fe2bbcace64a7555dd0bcc9007_2933	4a9cac2c1a817d9acdec143b653b9a80_4434	ac8fed72b32d7540cf9a1b9ac12df95a_4023	197b0243bc5bc4c380ecfb8919a026b1_2433	79ccbe49faa72747a800162f6a36c0ca_3657	614e29224da4f337b8899b3142d81070_4346	d977e7edc1a56720a787e465ab4ce472_2431	e653c257947c2dd0a414de7cb159ba14_3402	31e4ba73e5ddb8c85dea419204f0df5a_3479	752b3971131f3206662b5e22da3b23aa_3729	83683a6c7ca473684645e0830a47223d_2741	03da1bd30b32560bef8e38ea7761d9fe_3738	c648bd7c3a222aa51bed3e3836bcf8c8_4281	B9T21_03880.p01	B9T15_06015.p01	B9T14_05985.p01	B9T11_03870.p01	B9T12_06860.p01	B9T18_06550.p01	B9T13_04690.p01	F387_01534.p01	A6V30_08850.p01
fusA		elongation factor G	26	26	1	1	3686				1949	2096	2089	B9T10_06145.p01	BMY_1581.p01	a04b031c37c06570dd644ef46d09ac8c_3177	2cf5bec40a3ef4476bf46f509f729c16_2383	102e21fe2bbcace64a7555dd0bcc9007_2937	4a9cac2c1a817d9acdec143b653b9a80_4430	ac8fed72b32d7540cf9a1b9ac12df95a_4019	197b0243bc5bc4c380ecfb8919a026b1_2437	79ccbe49faa72747a800162f6a36c0ca_3661	614e29224da4f337b8899b3142d81070_4342	d977e7edc1a56720a787e465ab4ce472_2435	e653c257947c2dd0a414de7cb159ba14_3398	31e4ba73e5ddb8c85dea419204f0df5a_3483	752b3971131f3206662b5e22da3b23aa_3733	83683a6c7ca473684645e0830a47223d_2745	03da1bd30b32560bef8e38ea7761d9fe_3734	c648bd7c3a222aa51bed3e3836bcf8c8_4285	B9T21_03885.p01	B9T15_06020.p01	B9T14_05990.p01	B9T11_03865.p01	B9T12_06865.p01	B9T18_06545.p01	B9T13_04695.p01	F387_01535.p01	A6V30_08855.p01
rplB		50S ribosomal protein L2	26	26	1	1	3679				779	824	822	B9T10_06175.p01	BMY_1587.p01	a04b031c37c06570dd644ef46d09ac8c_3153	2cf5bec40a3ef4476bf46f509f729c16_2407	102e21fe2bbcace64a7555dd0bcc9007_2961	4a9cac2c1a817d9acdec143b653b9a80_3585	ac8fed72b32d7540cf9a1b9ac12df95a_3995	197b0243bc5bc4c380ecfb8919a026b1_2461	79ccbe49faa72747a800162f6a36c0ca_3685	614e29224da4f337b8899b3142d81070_4318	d977e7edc1a56720a787e465ab4ce472_2459	e653c257947c2dd0a414de7cb159ba14_3374	31e4ba73e5ddb8c85dea419204f0df5a_3507	752b3971131f3206662b5e22da3b23aa_3757	83683a6c7ca473684645e0830a47223d_2769	03da1bd30b32560bef8e38ea7761d9fe_3710	c648bd7c3a222aa51bed3e3836bcf8c8_4309	B9T21_03915.p01	B9T15_06050.p01	B9T14_06020.p01	B9T11_03835.p01	B9T12_06895.p01	B9T18_06515.p01	B9T13_04725.p01	F387_00830.p01	A6V30_08885.p01
rpsS		30S ribosomal protein S19	26	26	1	1	3678				227	272	270	B9T10_06180.p01	BMY_1588.p01	a04b031c37c06570dd644ef46d09ac8c_3149	2cf5bec40a3ef4476bf46f509f729c16_2411	102e21fe2bbcace64a7555dd0bcc9007_2965	4a9cac2c1a817d9acdec143b653b9a80_3589	ac8fed72b32d7540cf9a1b9ac12df95a_3991	197b0243bc5bc4c380ecfb8919a026b1_2465	79ccbe49faa72747a800162f6a36c0ca_3689	614e29224da4f337b8899b3142d81070_4314	d977e7edc1a56720a787e465ab4ce472_2463	e653c257947c2dd0a414de7cb159ba14_3370	31e4ba73e5ddb8c85dea419204f0df5a_3511	752b3971131f3206662b5e22da3b23aa_3761	83683a6c7ca473684645e0830a47223d_2773	03da1bd30b32560bef8e38ea7761d9fe_3706	c648bd7c3a222aa51bed3e3836bcf8c8_4313	B9T21_03920.p01	B9T15_06055.p01	B9T14_06025.p01	B9T11_03830.p01	B9T12_06900.p01	B9T18_06510.p01	B9T13_04730.p01	F387_00829.p01	A6V30_08890.p01
rplV		50S ribosomal protein L22	26	26	1	1	3677				311	326	325	B9T10_06185.p01	BMY_1589.p01	a04b031c37c06570dd644ef46d09ac8c_3145	2cf5bec40a3ef4476bf46f509f729c16_2415	102e21fe2bbcace64a7555dd0bcc9007_2969	4a9cac2c1a817d9acdec143b653b9a80_3593	ac8fed72b32d7540cf9a1b9ac12df95a_3987	197b0243bc5bc4c380ecfb8919a026b1_2469	79ccbe49faa72747a800162f6a36c0ca_3693	614e29224da4f337b8899b3142d81070_4310	d977e7edc1a56720a787e465ab4ce472_2467	e653c257947c2dd0a414de7cb159ba14_3366	31e4ba73e5ddb8c85dea419204f0df5a_3515	752b3971131f3206662b5e22da3b23aa_3765	83683a6c7ca473684645e0830a47223d_2777	03da1bd30b32560bef8e38ea7761d9fe_3702	c648bd7c3a222aa51bed3e3836bcf8c8_4317	B9T21_03925.p01	B9T15_06060.p01	B9T14_06030.p01	B9T11_03825.p01	B9T12_06905.p01	B9T18_06505.p01	B9T13_04735.p01	F387_00828.p01	A6V30_08895.p01
rplE		50S ribosomal protein L5	26	26	1	1	3670				491	539	537	B9T10_06220.p01	BMY_1596.p01	a04b031c37c06570dd644ef46d09ac8c_3117	2cf5bec40a3ef4476bf46f509f729c16_2443	102e21fe2bbcace64a7555dd0bcc9007_2997	4a9cac2c1a817d9acdec143b653b9a80_3621	ac8fed72b32d7540cf9a1b9ac12df95a_3959	197b0243bc5bc4c380ecfb8919a026b1_2497	79ccbe49faa72747a800162f6a36c0ca_3721	614e29224da4f337b8899b3142d81070_4282	d977e7edc1a56720a787e465ab4ce472_2495	e653c257947c2dd0a414de7cb159ba14_3338	31e4ba73e5ddb8c85dea419204f0df5a_3543	752b3971131f3206662b5e22da3b23aa_3793	83683a6c7ca473684645e0830a47223d_2805	03da1bd30b32560bef8e38ea7761d9fe_3674	c648bd7c3a222aa51bed3e3836bcf8c8_4345	B9T21_03960.p01	B9T15_06095.p01	B9T14_06065.p01	B9T11_03790.p01	B9T12_06940.p01	B9T18_06470.p01	B9T13_04770.p01	F387_00821.p01	A6V30_08930.p01
rplR		50S ribosomal protein L18	26	26	1	1	3666				239	356	351	B9T10_06240.p01	BMY_1600.p01	a04b031c37c06570dd644ef46d09ac8c_3101	2cf5bec40a3ef4476bf46f509f729c16_2459	102e21fe2bbcace64a7555dd0bcc9007_3013	4a9cac2c1a817d9acdec143b653b9a80_3637	ac8fed72b32d7540cf9a1b9ac12df95a_3943	197b0243bc5bc4c380ecfb8919a026b1_2513	79ccbe49faa72747a800162f6a36c0ca_3737	614e29224da4f337b8899b3142d81070_4266	d977e7edc1a56720a787e465ab4ce472_2511	e653c257947c2dd0a414de7cb159ba14_3322	31e4ba73e5ddb8c85dea419204f0df5a_3559	752b3971131f3206662b5e22da3b23aa_3809	83683a6c7ca473684645e0830a47223d_2821	03da1bd30b32560bef8e38ea7761d9fe_3658	c648bd7c3a222aa51bed3e3836bcf8c8_4361	B9T21_03980.p01	B9T15_06115.p01	B9T14_06085.p01	B9T11_03770.p01	B9T12_06960.p01	B9T18_06450.p01	B9T13_04790.p01	F387_00817.p01	A6V30_08950.p01
secY		preprotein translocase subunit SecY	26	26	1	1	3662				1286	1421	1415	B9T10_06260.p01	BMY_1604.p01	a04b031c37c06570dd644ef46d09ac8c_3085	2cf5bec40a3ef4476bf46f509f729c16_2475	102e21fe2bbcace64a7555dd0bcc9007_3029	4a9cac2c1a817d9acdec143b653b9a80_3653	ac8fed72b32d7540cf9a1b9ac12df95a_3927	197b0243bc5bc4c380ecfb8919a026b1_2529	79ccbe49faa72747a800162f6a36c0ca_3753	614e29224da4f337b8899b3142d81070_4250	d977e7edc1a56720a787e465ab4ce472_2527	e653c257947c2dd0a414de7cb159ba14_3306	31e4ba73e5ddb8c85dea419204f0df5a_3575	752b3971131f3206662b5e22da3b23aa_3825	83683a6c7ca473684645e0830a47223d_2837	03da1bd30b32560bef8e38ea7761d9fe_3642	c648bd7c3a222aa51bed3e3836bcf8c8_4377	B9T21_04000.p01	B9T15_06135.p01	B9T14_06105.p01	B9T11_03750.p01	B9T12_06980.p01	B9T18_06430.p01	B9T13_04810.p01	F387_00813.p01	A6V30_08970.p01
rplQ		50S ribosomal protein L17	26	26	1	1	3656				308	377	374	B9T10_06290.p01	BMY_1608.p01	a04b031c37c06570dd644ef46d09ac8c_3061	2cf5bec40a3ef4476bf46f509f729c16_2499	102e21fe2bbcace64a7555dd0bcc9007_3053	4a9cac2c1a817d9acdec143b653b9a80_3677	ac8fed72b32d7540cf9a1b9ac12df95a_3903	197b0243bc5bc4c380ecfb8919a026b1_2553	79ccbe49faa72747a800162f6a36c0ca_3777	614e29224da4f337b8899b3142d81070_4226	d977e7edc1a56720a787e465ab4ce472_2551	e653c257947c2dd0a414de7cb159ba14_3282	31e4ba73e5ddb8c85dea419204f0df5a_3599	752b3971131f3206662b5e22da3b23aa_3849	83683a6c7ca473684645e0830a47223d_2861	03da1bd30b32560bef8e38ea7761d9fe_3618	c648bd7c3a222aa51bed3e3836bcf8c8_4401	B9T21_04030.p01	B9T15_06165.p01	B9T14_06135.p01	B9T11_03720.p01	B9T12_07010.p01	B9T18_06400.p01	B9T13_04840.p01	F387_00808.p01	A6V30_08995.p01
J7554_04775		lipoprotein signal peptidase	26	26	1	1	3653				470	503	501	B9T10_06305.p01	BMY_1611.p01	a04b031c37c06570dd644ef46d09ac8c_3049	2cf5bec40a3ef4476bf46f509f729c16_2511	102e21fe2bbcace64a7555dd0bcc9007_3065	4a9cac2c1a817d9acdec143b653b9a80_3689	ac8fed72b32d7540cf9a1b9ac12df95a_3891	197b0243bc5bc4c380ecfb8919a026b1_2565	79ccbe49faa72747a800162f6a36c0ca_3789	614e29224da4f337b8899b3142d81070_4214	d977e7edc1a56720a787e465ab4ce472_2563	e653c257947c2dd0a414de7cb159ba14_3270	31e4ba73e5ddb8c85dea419204f0df5a_3611	752b3971131f3206662b5e22da3b23aa_3861	83683a6c7ca473684645e0830a47223d_2873	03da1bd30b32560bef8e38ea7761d9fe_3606	c648bd7c3a222aa51bed3e3836bcf8c8_4413	B9T21_04045.p01	B9T15_06180.p01	B9T14_06150.p01	B9T11_03705.p01	B9T12_07025.p01	B9T18_06385.p01	B9T13_04855.p01	F387_00805.p01	A6V30_09010.p01
J7561_04685		hypothetical protein	26	26	1	1	3644				275	284	275	B9T10_06355.p01	BMY_1621.p01	a04b031c37c06570dd644ef46d09ac8c_3010	2cf5bec40a3ef4476bf46f509f729c16_2550	102e21fe2bbcace64a7555dd0bcc9007_3104	4a9cac2c1a817d9acdec143b653b9a80_3728	ac8fed72b32d7540cf9a1b9ac12df95a_3852	197b0243bc5bc4c380ecfb8919a026b1_2604	79ccbe49faa72747a800162f6a36c0ca_3828	614e29224da4f337b8899b3142d81070_4175	d977e7edc1a56720a787e465ab4ce472_2602	e653c257947c2dd0a414de7cb159ba14_3231	31e4ba73e5ddb8c85dea419204f0df5a_3650	752b3971131f3206662b5e22da3b23aa_3900	83683a6c7ca473684645e0830a47223d_2912	03da1bd30b32560bef8e38ea7761d9fe_3567	c648bd7c3a222aa51bed3e3836bcf8c8_4452	B9T21_04095.p01	B9T15_06230.p01	B9T14_06200.p01	B9T11_03655.p01	B9T12_07075.p01	B9T18_06335.p01	B9T13_04905.p01	F387_00795.p01	A6V30_09060.p01
recG		ATP-dependent DNA helicase RecG	26	26	1	1	3641				1943	2036	2032	B9T10_06370.p01	BMY_1624.p01	a04b031c37c06570dd644ef46d09ac8c_2998	2cf5bec40a3ef4476bf46f509f729c16_2562	102e21fe2bbcace64a7555dd0bcc9007_3116	4a9cac2c1a817d9acdec143b653b9a80_3740	ac8fed72b32d7540cf9a1b9ac12df95a_3840	197b0243bc5bc4c380ecfb8919a026b1_2616	79ccbe49faa72747a800162f6a36c0ca_3840	614e29224da4f337b8899b3142d81070_4163	d977e7edc1a56720a787e465ab4ce472_2614	e653c257947c2dd0a414de7cb159ba14_3219	31e4ba73e5ddb8c85dea419204f0df5a_3662	752b3971131f3206662b5e22da3b23aa_3912	83683a6c7ca473684645e0830a47223d_2924	03da1bd30b32560bef8e38ea7761d9fe_3555	c648bd7c3a222aa51bed3e3836bcf8c8_4464	B9T21_04110.p01	B9T15_06245.p01	B9T14_06215.p01	B9T11_03640.p01	B9T12_07090.p01	B9T18_06320.p01	B9T13_04920.p01	F387_00792.p01	A6V30_09075.p01
J7560_03290		hypothetical protein	26	26	1	1	3601				206	206	206	B9T10_06520.p01	BMY_1656.p01	a04b031c37c06570dd644ef46d09ac8c_2882	2cf5bec40a3ef4476bf46f509f729c16_2606	102e21fe2bbcace64a7555dd0bcc9007_3232	4a9cac2c1a817d9acdec143b653b9a80_3856	ac8fed72b32d7540cf9a1b9ac12df95a_3724	197b0243bc5bc4c380ecfb8919a026b1_2732	79ccbe49faa72747a800162f6a36c0ca_3879	614e29224da4f337b8899b3142d81070_4119	d977e7edc1a56720a787e465ab4ce472_2658	e653c257947c2dd0a414de7cb159ba14_3175	31e4ba73e5ddb8c85dea419204f0df5a_3782	752b3971131f3206662b5e22da3b23aa_3956	83683a6c7ca473684645e0830a47223d_2968	03da1bd30b32560bef8e38ea7761d9fe_3435	c648bd7c3a222aa51bed3e3836bcf8c8_4504	B9T21_04260.p01	B9T15_06395.p01	B9T14_06365.p01	B9T11_03490.p01	B9T12_07145.p01	B9T18_06170.p01	B9T13_05070.p01	F387_00762.p01	A6V30_09230.p01
BMY_1658		hydrogen peroxide-inducible genes activator	26	26	1	1	3599				839	872	870	B9T10_06530.p01	BMY_1658.p01	a04b031c37c06570dd644ef46d09ac8c_2874	2cf5bec40a3ef4476bf46f509f729c16_2614	102e21fe2bbcace64a7555dd0bcc9007_3240	4a9cac2c1a817d9acdec143b653b9a80_3864	ac8fed72b32d7540cf9a1b9ac12df95a_3716	197b0243bc5bc4c380ecfb8919a026b1_2740	79ccbe49faa72747a800162f6a36c0ca_3887	614e29224da4f337b8899b3142d81070_4111	d977e7edc1a56720a787e465ab4ce472_2666	e653c257947c2dd0a414de7cb159ba14_3167	31e4ba73e5ddb8c85dea419204f0df5a_3790	752b3971131f3206662b5e22da3b23aa_3964	83683a6c7ca473684645e0830a47223d_2976	03da1bd30b32560bef8e38ea7761d9fe_3427	c648bd7c3a222aa51bed3e3836bcf8c8_4512	B9T21_04270.p01	B9T15_06405.p01	B9T14_06375.p01	B9T11_03480.p01	B9T12_07155.p01	B9T18_06160.p01	B9T13_05080.p01	F387_00760.p01	A6V30_09240.p01
B9T18_06130		LysR family transcriptional regulator	26	26	1	1	3592				902	902	902	B9T10_06560.p01	BMY_1665.p01	a04b031c37c06570dd644ef46d09ac8c_2850	2cf5bec40a3ef4476bf46f509f729c16_2639	102e21fe2bbcace64a7555dd0bcc9007_3265	4a9cac2c1a817d9acdec143b653b9a80_3889	ac8fed72b32d7540cf9a1b9ac12df95a_3692	197b0243bc5bc4c380ecfb8919a026b1_2765	79ccbe49faa72747a800162f6a36c0ca_3912	614e29224da4f337b8899b3142d81070_4087	d977e7edc1a56720a787e465ab4ce472_2691	e653c257947c2dd0a414de7cb159ba14_3143	31e4ba73e5ddb8c85dea419204f0df5a_3815	752b3971131f3206662b5e22da3b23aa_3989	83683a6c7ca473684645e0830a47223d_3001	03da1bd30b32560bef8e38ea7761d9fe_3403	c648bd7c3a222aa51bed3e3836bcf8c8_4537	B9T21_04300.p01	B9T15_06435.p01	B9T14_06405.p01	B9T11_03450.p01	B9T12_07185.p01	B9T18_06130.p01	B9T13_05110.p01	F387_00754.p01	A6V30_09270.p01
J7554_04940		riboflavin synthase	26	26	1	1	3590				623	623	623	B9T10_06570.p01	BMY_1667.p01	a04b031c37c06570dd644ef46d09ac8c_2841	2cf5bec40a3ef4476bf46f509f729c16_2647	102e21fe2bbcace64a7555dd0bcc9007_3273	4a9cac2c1a817d9acdec143b653b9a80_3897	ac8fed72b32d7540cf9a1b9ac12df95a_3683	197b0243bc5bc4c380ecfb8919a026b1_2773	79ccbe49faa72747a800162f6a36c0ca_3920	614e29224da4f337b8899b3142d81070_4078	d977e7edc1a56720a787e465ab4ce472_2699	e653c257947c2dd0a414de7cb159ba14_3134	31e4ba73e5ddb8c85dea419204f0df5a_3823	752b3971131f3206662b5e22da3b23aa_3997	83683a6c7ca473684645e0830a47223d_3009	03da1bd30b32560bef8e38ea7761d9fe_3394	c648bd7c3a222aa51bed3e3836bcf8c8_4545	B9T21_04310.p01	B9T15_06445.p01	B9T14_06415.p01	B9T11_03440.p01	B9T12_07195.p01	B9T18_06120.p01	B9T13_05120.p01	F387_00752.p01	A6V30_09280.p01
ribB		bifunctional 3,4-dihydroxy-2-butanone-4-phosphate synthase/GTP cyclohydrolase II	26	26	1	1	3589				332	1205	1171	B9T10_06575.p01	BMY_1669.p01	a04b031c37c06570dd644ef46d09ac8c_2837	2cf5bec40a3ef4476bf46f509f729c16_2651	102e21fe2bbcace64a7555dd0bcc9007_3277	4a9cac2c1a817d9acdec143b653b9a80_3901	ac8fed72b32d7540cf9a1b9ac12df95a_3679	197b0243bc5bc4c380ecfb8919a026b1_2777	79ccbe49faa72747a800162f6a36c0ca_3924	614e29224da4f337b8899b3142d81070_4074	d977e7edc1a56720a787e465ab4ce472_2703	e653c257947c2dd0a414de7cb159ba14_3130	31e4ba73e5ddb8c85dea419204f0df5a_3827	752b3971131f3206662b5e22da3b23aa_4001	83683a6c7ca473684645e0830a47223d_3013	03da1bd30b32560bef8e38ea7761d9fe_3390	c648bd7c3a222aa51bed3e3836bcf8c8_4549	B9T21_04315.p01	B9T15_06450.p01	B9T14_06420.p01	B9T11_03435.p01	B9T12_07200.p01	B9T18_06115.p01	B9T13_05125.p01	F387_00751.p01	A6V30_09285.p01
B9T12_07210		YdcF family protein	26	26	1	1	3587				560	629	626	B9T10_06585.p01	BMY_1671.p01	a04b031c37c06570dd644ef46d09ac8c_2829	2cf5bec40a3ef4476bf46f509f729c16_2659	102e21fe2bbcace64a7555dd0bcc9007_3285	4a9cac2c1a817d9acdec143b653b9a80_3909	ac8fed72b32d7540cf9a1b9ac12df95a_3671	197b0243bc5bc4c380ecfb8919a026b1_2785	79ccbe49faa72747a800162f6a36c0ca_3932	614e29224da4f337b8899b3142d81070_4066	d977e7edc1a56720a787e465ab4ce472_2711	e653c257947c2dd0a414de7cb159ba14_3122	31e4ba73e5ddb8c85dea419204f0df5a_3835	752b3971131f3206662b5e22da3b23aa_4009	83683a6c7ca473684645e0830a47223d_3021	03da1bd30b32560bef8e38ea7761d9fe_3382	c648bd7c3a222aa51bed3e3836bcf8c8_4557	B9T21_04325.p01	B9T15_06460.p01	B9T14_06430.p01	B9T11_03425.p01	B9T12_07210.p01	B9T18_06105.p01	B9T13_05135.p01	F387_00749.p01	A6V30_09295.p01
BMY_1679		formate/nitrite transporter family protein	26	26	1	1	3579				779	851	848	B9T10_06625.p01	BMY_1679.p01	a04b031c37c06570dd644ef46d09ac8c_2797	2cf5bec40a3ef4476bf46f509f729c16_2691	102e21fe2bbcace64a7555dd0bcc9007_3317	4a9cac2c1a817d9acdec143b653b9a80_3941	ac8fed72b32d7540cf9a1b9ac12df95a_3639	197b0243bc5bc4c380ecfb8919a026b1_2817	79ccbe49faa72747a800162f6a36c0ca_3964	614e29224da4f337b8899b3142d81070_4034	d977e7edc1a56720a787e465ab4ce472_2743	e653c257947c2dd0a414de7cb159ba14_3090	31e4ba73e5ddb8c85dea419204f0df5a_3867	752b3971131f3206662b5e22da3b23aa_4041	83683a6c7ca473684645e0830a47223d_3053	03da1bd30b32560bef8e38ea7761d9fe_3350	c648bd7c3a222aa51bed3e3836bcf8c8_4589	B9T21_04365.p01	B9T15_06500.p01	B9T14_06470.p01	B9T11_03385.p01	B9T12_07250.p01	B9T18_06065.p01	B9T13_05175.p01	F387_00741.p01	A6V30_09335.p01
A6V30_09355		ABC transporter permease	26	26	1	1	3575				956	1103	961	B9T10_06645.p01	BMY_1683.p01	a04b031c37c06570dd644ef46d09ac8c_2781	2cf5bec40a3ef4476bf46f509f729c16_2707	102e21fe2bbcace64a7555dd0bcc9007_3333	4a9cac2c1a817d9acdec143b653b9a80_3957	ac8fed72b32d7540cf9a1b9ac12df95a_3624	197b0243bc5bc4c380ecfb8919a026b1_2833	79ccbe49faa72747a800162f6a36c0ca_3980	614e29224da4f337b8899b3142d81070_4018	d977e7edc1a56720a787e465ab4ce472_2759	e653c257947c2dd0a414de7cb159ba14_3074	31e4ba73e5ddb8c85dea419204f0df5a_3883	752b3971131f3206662b5e22da3b23aa_4057	83683a6c7ca473684645e0830a47223d_3069	03da1bd30b32560bef8e38ea7761d9fe_3334	c648bd7c3a222aa51bed3e3836bcf8c8_4605	B9T21_04385.p01	B9T15_06520.p01	B9T14_06490.p01	B9T11_03365.p01	B9T12_07270.p01	B9T18_06045.p01	B9T13_05195.p01	F387_00737.p01	A6V30_09355.p01
B9T11_03355		QacE family quaternary ammonium compound efflux SMR transporter	26	26	1	1	3573				347	347	347	B9T10_06655.p01	BMY_1685.p01	a04b031c37c06570dd644ef46d09ac8c_2773	2cf5bec40a3ef4476bf46f509f729c16_2715	102e21fe2bbcace64a7555dd0bcc9007_3341	4a9cac2c1a817d9acdec143b653b9a80_3965	ac8fed72b32d7540cf9a1b9ac12df95a_3616	197b0243bc5bc4c380ecfb8919a026b1_2841	79ccbe49faa72747a800162f6a36c0ca_3988	614e29224da4f337b8899b3142d81070_4010	d977e7edc1a56720a787e465ab4ce472_2767	e653c257947c2dd0a414de7cb159ba14_3066	31e4ba73e5ddb8c85dea419204f0df5a_3891	752b3971131f3206662b5e22da3b23aa_4065	83683a6c7ca473684645e0830a47223d_3077	03da1bd30b32560bef8e38ea7761d9fe_3326	c648bd7c3a222aa51bed3e3836bcf8c8_4613	B9T21_04395.p01	B9T15_06530.p01	B9T14_06500.p01	B9T11_03355.p01	B9T12_07280.p01	B9T18_06035.p01	B9T13_05205.p01	F387_00735.p01	A6V30_09365.p01
J7602_03485		QacE family quaternary ammonium compound efflux SMR transporter	26	26	1	1	3572				299	335	333	B9T10_06660.p01	BMY_1686.p01	a04b031c37c06570dd644ef46d09ac8c_2769	2cf5bec40a3ef4476bf46f509f729c16_2719	102e21fe2bbcace64a7555dd0bcc9007_3345	4a9cac2c1a817d9acdec143b653b9a80_3969	ac8fed72b32d7540cf9a1b9ac12df95a_3612	197b0243bc5bc4c380ecfb8919a026b1_2845	79ccbe49faa72747a800162f6a36c0ca_3992	614e29224da4f337b8899b3142d81070_4006	d977e7edc1a56720a787e465ab4ce472_2771	e653c257947c2dd0a414de7cb159ba14_3062	31e4ba73e5ddb8c85dea419204f0df5a_3895	752b3971131f3206662b5e22da3b23aa_4069	83683a6c7ca473684645e0830a47223d_3081	03da1bd30b32560bef8e38ea7761d9fe_3322	c648bd7c3a222aa51bed3e3836bcf8c8_4617	B9T21_04400.p01	B9T15_06535.p01	B9T14_06505.p01	B9T11_03350.p01	B9T12_07285.p01	B9T18_06030.p01	B9T13_05210.p01	F387_00734.p01	A6V30_09370.p01
dnaK		molecular chaperone DnaK	26	26	1	1	3566				1877	1931	1928	B9T10_06680.p01	BMY_1690.p01	a04b031c37c06570dd644ef46d09ac8c_2749	2cf5bec40a3ef4476bf46f509f729c16_2735	102e21fe2bbcace64a7555dd0bcc9007_3361	4a9cac2c1a817d9acdec143b653b9a80_3985	ac8fed72b32d7540cf9a1b9ac12df95a_3592	197b0243bc5bc4c380ecfb8919a026b1_2859	79ccbe49faa72747a800162f6a36c0ca_4008	614e29224da4f337b8899b3142d81070_3992	d977e7edc1a56720a787e465ab4ce472_2785	e653c257947c2dd0a414de7cb159ba14_3048	31e4ba73e5ddb8c85dea419204f0df5a_3911	752b3971131f3206662b5e22da3b23aa_4085	83683a6c7ca473684645e0830a47223d_3095	03da1bd30b32560bef8e38ea7761d9fe_3302	c648bd7c3a222aa51bed3e3836bcf8c8_4633	B9T21_04420.p01	B9T15_06555.p01	B9T14_06525.p01	B9T11_03330.p01	B9T12_07305.p01	B9T18_06010.p01	B9T13_05230.p01	F387_00729.p01	A6V30_09390.p01
ccoN		cytochrome-c oxidase, cbb3-type subunit I	26	26	1	1	3558				1415	1460	1456	B9T10_06715.p01	BMY_1698.p01	a04b031c37c06570dd644ef46d09ac8c_2717	2cf5bec40a3ef4476bf46f509f729c16_2767	102e21fe2bbcace64a7555dd0bcc9007_3393	4a9cac2c1a817d9acdec143b653b9a80_4017	ac8fed72b32d7540cf9a1b9ac12df95a_3560	197b0243bc5bc4c380ecfb8919a026b1_2891	79ccbe49faa72747a800162f6a36c0ca_4040	614e29224da4f337b8899b3142d81070_3960	d977e7edc1a56720a787e465ab4ce472_2817	e653c257947c2dd0a414de7cb159ba14_3016	31e4ba73e5ddb8c85dea419204f0df5a_3943	752b3971131f3206662b5e22da3b23aa_4117	83683a6c7ca473684645e0830a47223d_3127	03da1bd30b32560bef8e38ea7761d9fe_3270	c648bd7c3a222aa51bed3e3836bcf8c8_4665	B9T21_04455.p01	B9T15_06590.p01	B9T14_06560.p01	B9T11_03295.p01	B9T12_07340.p01	B9T18_05975.p01	B9T13_05265.p01	F387_00721.p01	A6V30_09425.p01
ccoS		cbb3-type cytochrome oxidase assembly protein CcoS	26	26	1	1	3550				170	206	204	B9T10_06750.p01	BMY_1706.p01	a04b031c37c06570dd644ef46d09ac8c_2689	2cf5bec40a3ef4476bf46f509f729c16_2795	102e21fe2bbcace64a7555dd0bcc9007_3421	4a9cac2c1a817d9acdec143b653b9a80_4045	ac8fed72b32d7540cf9a1b9ac12df95a_3532	197b0243bc5bc4c380ecfb8919a026b1_2919	79ccbe49faa72747a800162f6a36c0ca_4068	614e29224da4f337b8899b3142d81070_3932	d977e7edc1a56720a787e465ab4ce472_2845	e653c257947c2dd0a414de7cb159ba14_2988	31e4ba73e5ddb8c85dea419204f0df5a_3971	752b3971131f3206662b5e22da3b23aa_4145	83683a6c7ca473684645e0830a47223d_3155	03da1bd30b32560bef8e38ea7761d9fe_3242	c648bd7c3a222aa51bed3e3836bcf8c8_4693	B9T21_04490.p01	B9T15_06625.p01	B9T14_06595.p01	B9T11_03260.p01	B9T12_07375.p01	B9T18_05940.p01	B9T13_05300.p01	F387_00714.p01	A6V30_09460.p01
gatA		Asp-tRNA(Asn)/Glu-tRNA(Gln) amidotransferase subunit GatA	26	26	1	1	3548				1382	1445	1442	B9T10_06760.p01	BMY_1708.p01	a04b031c37c06570dd644ef46d09ac8c_2681	2cf5bec40a3ef4476bf46f509f729c16_2803	102e21fe2bbcace64a7555dd0bcc9007_3429	4a9cac2c1a817d9acdec143b653b9a80_4053	ac8fed72b32d7540cf9a1b9ac12df95a_3524	197b0243bc5bc4c380ecfb8919a026b1_2927	79ccbe49faa72747a800162f6a36c0ca_4076	614e29224da4f337b8899b3142d81070_3924	d977e7edc1a56720a787e465ab4ce472_2853	e653c257947c2dd0a414de7cb159ba14_2980	31e4ba73e5ddb8c85dea419204f0df5a_3979	752b3971131f3206662b5e22da3b23aa_4153	83683a6c7ca473684645e0830a47223d_3163	03da1bd30b32560bef8e38ea7761d9fe_3234	c648bd7c3a222aa51bed3e3836bcf8c8_4701	B9T21_04500.p01	B9T15_06635.p01	B9T14_06605.p01	B9T11_03250.p01	B9T12_07385.p01	B9T18_05930.p01	B9T13_05310.p01	F387_00712.p01	A6V30_09470.p01
B9T13_05385		MFS transporter	26	26	1	1	3533				1316	1355	1353	B9T10_06820.p01	BMY_1720.p01	a04b031c37c06570dd644ef46d09ac8c_2620	2cf5bec40a3ef4476bf46f509f729c16_2852	102e21fe2bbcace64a7555dd0bcc9007_3490	4a9cac2c1a817d9acdec143b653b9a80_4114	ac8fed72b32d7540cf9a1b9ac12df95a_3463	197b0243bc5bc4c380ecfb8919a026b1_2976	79ccbe49faa72747a800162f6a36c0ca_4124	614e29224da4f337b8899b3142d81070_3875	d977e7edc1a56720a787e465ab4ce472_2902	e653c257947c2dd0a414de7cb159ba14_2931	31e4ba73e5ddb8c85dea419204f0df5a_4028	752b3971131f3206662b5e22da3b23aa_4214	83683a6c7ca473684645e0830a47223d_3212	03da1bd30b32560bef8e38ea7761d9fe_3173	c648bd7c3a222aa51bed3e3836bcf8c8_4762	B9T21_04575.p01	B9T15_06710.p01	B9T14_06680.p01	B9T11_03175.p01	B9T12_07445.p01	B9T18_05870.p01	B9T13_05385.p01	F387_00697.p01	A6V30_09530.p01
J7553_04320		peptidoglycan DD-metalloendopeptidase family protein	26	26	1	1	3522				671	698	696	B9T10_06865.p01	BMY_1729.p01	a04b031c37c06570dd644ef46d09ac8c_2584	2cf5bec40a3ef4476bf46f509f729c16_2888	102e21fe2bbcace64a7555dd0bcc9007_3526	4a9cac2c1a817d9acdec143b653b9a80_4150	ac8fed72b32d7540cf9a1b9ac12df95a_3427	197b0243bc5bc4c380ecfb8919a026b1_3012	79ccbe49faa72747a800162f6a36c0ca_4160	614e29224da4f337b8899b3142d81070_3839	d977e7edc1a56720a787e465ab4ce472_2938	e653c257947c2dd0a414de7cb159ba14_2895	31e4ba73e5ddb8c85dea419204f0df5a_4064	752b3971131f3206662b5e22da3b23aa_4250	83683a6c7ca473684645e0830a47223d_3248	03da1bd30b32560bef8e38ea7761d9fe_3137	c648bd7c3a222aa51bed3e3836bcf8c8_4798	B9T21_04620.p01	B9T15_06755.p01	B9T14_06725.p01	B9T11_03130.p01	B9T12_07490.p01	B9T18_05825.p01	B9T13_05430.p01	F387_00688.p01	A6V30_09575.p01
J7560_04655		thioredoxin fold domain-containing protein	26	26	1	1	1358				503	542	540	B9T10_00895.p01	BMY_2064.p01	a04b031c37c06570dd644ef46d09ac8c_4776	2cf5bec40a3ef4476bf46f509f729c16_3699	102e21fe2bbcace64a7555dd0bcc9007_3952	4a9cac2c1a817d9acdec143b653b9a80_1948	ac8fed72b32d7540cf9a1b9ac12df95a_4975	197b0243bc5bc4c380ecfb8919a026b1_3455	79ccbe49faa72747a800162f6a36c0ca_5389	614e29224da4f337b8899b3142d81070_5684	d977e7edc1a56720a787e465ab4ce472_5806	e653c257947c2dd0a414de7cb159ba14_5790	31e4ba73e5ddb8c85dea419204f0df5a_4534	752b3971131f3206662b5e22da3b23aa_5814	83683a6c7ca473684645e0830a47223d_5740	03da1bd30b32560bef8e38ea7761d9fe_4040	c648bd7c3a222aa51bed3e3836bcf8c8_3100	B9T21_00890.p01	B9T15_04130.p01	B9T14_00910.p01	B9T11_01835.p01	B9T12_00905.p01	B9T18_04200.p01	B9T13_00910.p01	F387_01015.p01	A6V30_02525.p01
B9T15_06780		inorganic phosphate transporter	26	26	1	1	3517				1397	1466	1463	B9T10_06890.p01	BMY_1734.p01	a04b031c37c06570dd644ef46d09ac8c_2564	2cf5bec40a3ef4476bf46f509f729c16_2908	102e21fe2bbcace64a7555dd0bcc9007_3546	4a9cac2c1a817d9acdec143b653b9a80_4170	ac8fed72b32d7540cf9a1b9ac12df95a_3407	197b0243bc5bc4c380ecfb8919a026b1_3032	79ccbe49faa72747a800162f6a36c0ca_4180	614e29224da4f337b8899b3142d81070_3819	d977e7edc1a56720a787e465ab4ce472_2958	e653c257947c2dd0a414de7cb159ba14_2875	31e4ba73e5ddb8c85dea419204f0df5a_4084	752b3971131f3206662b5e22da3b23aa_4270	83683a6c7ca473684645e0830a47223d_3268	03da1bd30b32560bef8e38ea7761d9fe_3117	c648bd7c3a222aa51bed3e3836bcf8c8_4818	B9T21_04645.p01	B9T15_06780.p01	B9T14_06750.p01	B9T11_03105.p01	B9T12_07515.p01	B9T18_05800.p01	B9T13_05455.p01	F387_00683.p01	A6V30_09600.p01
B9T21_04650		L-threonylcarbamoyladenylate synthase	26	26	1	1	3516				254	560	548	B9T10_06895.p01	BMY_1736.p01	a04b031c37c06570dd644ef46d09ac8c_2560	2cf5bec40a3ef4476bf46f509f729c16_2912	102e21fe2bbcace64a7555dd0bcc9007_3550	4a9cac2c1a817d9acdec143b653b9a80_4174	ac8fed72b32d7540cf9a1b9ac12df95a_3403	197b0243bc5bc4c380ecfb8919a026b1_3036	79ccbe49faa72747a800162f6a36c0ca_4184	614e29224da4f337b8899b3142d81070_3815	d977e7edc1a56720a787e465ab4ce472_2962	e653c257947c2dd0a414de7cb159ba14_2871	31e4ba73e5ddb8c85dea419204f0df5a_4088	752b3971131f3206662b5e22da3b23aa_4274	83683a6c7ca473684645e0830a47223d_3272	03da1bd30b32560bef8e38ea7761d9fe_3113	c648bd7c3a222aa51bed3e3836bcf8c8_4822	B9T21_04650.p01	B9T15_06785.p01	B9T14_06755.p01	B9T11_03100.p01	B9T12_07520.p01	B9T18_05795.p01	B9T13_05460.p01	F387_00682.p01	A6V30_09605.p01
J7554_05275		PAS domain-containing protein	26	26	1	1	3515				482	515	513	B9T10_06900.p01	BMY_1737.p01	a04b031c37c06570dd644ef46d09ac8c_2556	2cf5bec40a3ef4476bf46f509f729c16_2916	102e21fe2bbcace64a7555dd0bcc9007_3554	4a9cac2c1a817d9acdec143b653b9a80_4178	ac8fed72b32d7540cf9a1b9ac12df95a_3399	197b0243bc5bc4c380ecfb8919a026b1_3040	79ccbe49faa72747a800162f6a36c0ca_4188	614e29224da4f337b8899b3142d81070_3811	d977e7edc1a56720a787e465ab4ce472_2966	e653c257947c2dd0a414de7cb159ba14_2867	31e4ba73e5ddb8c85dea419204f0df5a_4092	752b3971131f3206662b5e22da3b23aa_4278	83683a6c7ca473684645e0830a47223d_3276	03da1bd30b32560bef8e38ea7761d9fe_3109	c648bd7c3a222aa51bed3e3836bcf8c8_4826	B9T21_04655.p01	B9T15_06790.p01	B9T14_06760.p01	B9T11_03095.p01	B9T12_07525.p01	B9T18_05790.p01	B9T13_05465.p01	F387_00681.p01	A6V30_09610.p01
alaS		alanine--tRNA ligase	26	26	1	1	3512				2483	2606	2601	B9T10_06915.p01	BMY_1740.p01	a04b031c37c06570dd644ef46d09ac8c_2544	2cf5bec40a3ef4476bf46f509f729c16_2928	102e21fe2bbcace64a7555dd0bcc9007_3566	4a9cac2c1a817d9acdec143b653b9a80_4190	ac8fed72b32d7540cf9a1b9ac12df95a_3387	197b0243bc5bc4c380ecfb8919a026b1_3052	79ccbe49faa72747a800162f6a36c0ca_4200	614e29224da4f337b8899b3142d81070_3799	d977e7edc1a56720a787e465ab4ce472_2978	e653c257947c2dd0a414de7cb159ba14_2855	31e4ba73e5ddb8c85dea419204f0df5a_4104	752b3971131f3206662b5e22da3b23aa_4290	83683a6c7ca473684645e0830a47223d_3288	03da1bd30b32560bef8e38ea7761d9fe_3097	c648bd7c3a222aa51bed3e3836bcf8c8_4838	B9T21_04670.p01	B9T15_06805.p01	B9T14_06775.p01	B9T11_03080.p01	B9T12_07540.p01	B9T18_05775.p01	B9T13_05480.p01	F387_00678.p01	A6V30_09625.p01
leuC		3-isopropylmalate dehydratase large subunit	26	26	1	1	3510				1358	1400	1398	B9T10_06925.p01	BMY_1742.p01	a04b031c37c06570dd644ef46d09ac8c_2536	2cf5bec40a3ef4476bf46f509f729c16_2936	102e21fe2bbcace64a7555dd0bcc9007_3574	4a9cac2c1a817d9acdec143b653b9a80_4198	ac8fed72b32d7540cf9a1b9ac12df95a_3379	197b0243bc5bc4c380ecfb8919a026b1_3060	79ccbe49faa72747a800162f6a36c0ca_4208	614e29224da4f337b8899b3142d81070_3791	d977e7edc1a56720a787e465ab4ce472_2986	e653c257947c2dd0a414de7cb159ba14_2847	31e4ba73e5ddb8c85dea419204f0df5a_4112	752b3971131f3206662b5e22da3b23aa_4298	83683a6c7ca473684645e0830a47223d_3296	03da1bd30b32560bef8e38ea7761d9fe_3089	c648bd7c3a222aa51bed3e3836bcf8c8_4846	B9T21_04680.p01	B9T15_06815.p01	B9T14_06785.p01	B9T11_03070.p01	B9T12_07550.p01	B9T18_05765.p01	B9T13_05490.p01	F387_00676.p01	A6V30_09635.p01
fabB		beta-ketoacyl-ACP synthase I	26	26	1	1	3496				1106	1220	1215	B9T10_06995.p01	BMY_1757.p01	a04b031c37c06570dd644ef46d09ac8c_2480	2cf5bec40a3ef4476bf46f509f729c16_2992	102e21fe2bbcace64a7555dd0bcc9007_3630	4a9cac2c1a817d9acdec143b653b9a80_4254	ac8fed72b32d7540cf9a1b9ac12df95a_3324	197b0243bc5bc4c380ecfb8919a026b1_3116	79ccbe49faa72747a800162f6a36c0ca_4264	614e29224da4f337b8899b3142d81070_3735	d977e7edc1a56720a787e465ab4ce472_3042	e653c257947c2dd0a414de7cb159ba14_2791	31e4ba73e5ddb8c85dea419204f0df5a_4168	752b3971131f3206662b5e22da3b23aa_4354	83683a6c7ca473684645e0830a47223d_3352	03da1bd30b32560bef8e38ea7761d9fe_3033	c648bd7c3a222aa51bed3e3836bcf8c8_4902	B9T21_04750.p01	B9T15_06885.p01	B9T14_06855.p01	B9T11_03000.p01	B9T12_07620.p01	B9T18_05695.p01	B9T13_05560.p01	F387_00662.p01	A6V30_09705.p01
ruvB		Holliday junction branch migration DNA helicase RuvB	26	26	1	1	3485				986	1007	998	B9T10_07040.p01	BMY_1768.p01	a04b031c37c06570dd644ef46d09ac8c_2444	2cf5bec40a3ef4476bf46f509f729c16_3028	102e21fe2bbcace64a7555dd0bcc9007_3666	4a9cac2c1a817d9acdec143b653b9a80_4290	ac8fed72b32d7540cf9a1b9ac12df95a_3288	197b0243bc5bc4c380ecfb8919a026b1_3152	79ccbe49faa72747a800162f6a36c0ca_4300	614e29224da4f337b8899b3142d81070_3699	d977e7edc1a56720a787e465ab4ce472_3078	e653c257947c2dd0a414de7cb159ba14_2755	31e4ba73e5ddb8c85dea419204f0df5a_4204	752b3971131f3206662b5e22da3b23aa_4390	83683a6c7ca473684645e0830a47223d_3388	03da1bd30b32560bef8e38ea7761d9fe_2997	c648bd7c3a222aa51bed3e3836bcf8c8_4938	B9T21_04795.p01	B9T15_06930.p01	B9T14_06900.p01	B9T11_02955.p01	B9T12_07665.p01	B9T18_05650.p01	B9T13_05605.p01	F387_00653.p01	A6V30_09750.p01
nfo		deoxyribonuclease IV	26	26	1	1	3481				851	872	851	B9T10_07055.p01	BMY_1770.p01	a04b031c37c06570dd644ef46d09ac8c_2432	2cf5bec40a3ef4476bf46f509f729c16_3040	102e21fe2bbcace64a7555dd0bcc9007_3678	4a9cac2c1a817d9acdec143b653b9a80_4302	ac8fed72b32d7540cf9a1b9ac12df95a_3276	197b0243bc5bc4c380ecfb8919a026b1_3164	79ccbe49faa72747a800162f6a36c0ca_4312	614e29224da4f337b8899b3142d81070_3687	d977e7edc1a56720a787e465ab4ce472_3090	e653c257947c2dd0a414de7cb159ba14_2743	31e4ba73e5ddb8c85dea419204f0df5a_4216	752b3971131f3206662b5e22da3b23aa_4402	83683a6c7ca473684645e0830a47223d_3400	03da1bd30b32560bef8e38ea7761d9fe_2985	c648bd7c3a222aa51bed3e3836bcf8c8_4950	B9T21_04810.p01	B9T15_06945.p01	B9T14_06915.p01	B9T11_02940.p01	B9T12_07680.p01	B9T18_05635.p01	B9T13_05620.p01	F387_00650.p01	A6V30_09765.p01
gshB		glutathione synthase	26	26	1	1	3477				941	968	966	B9T10_07075.p01	BMY_1774.p01	a04b031c37c06570dd644ef46d09ac8c_2416	2cf5bec40a3ef4476bf46f509f729c16_3056	102e21fe2bbcace64a7555dd0bcc9007_3694	4a9cac2c1a817d9acdec143b653b9a80_4318	ac8fed72b32d7540cf9a1b9ac12df95a_3260	197b0243bc5bc4c380ecfb8919a026b1_3180	79ccbe49faa72747a800162f6a36c0ca_4328	614e29224da4f337b8899b3142d81070_3671	d977e7edc1a56720a787e465ab4ce472_3106	e653c257947c2dd0a414de7cb159ba14_2727	31e4ba73e5ddb8c85dea419204f0df5a_4232	752b3971131f3206662b5e22da3b23aa_4418	83683a6c7ca473684645e0830a47223d_3416	03da1bd30b32560bef8e38ea7761d9fe_2969	c648bd7c3a222aa51bed3e3836bcf8c8_4966	B9T21_04830.p01	B9T15_06965.p01	B9T14_06935.p01	B9T11_02920.p01	B9T12_07700.p01	B9T18_05615.p01	B9T13_05640.p01	F387_00646.p01	A6V30_09785.p01
J7554_05455		16S rRNA (uracil(1498)-N(3))-methyltransferase	26	26	1	1	3476				737	737	737	B9T10_07080.p01	BMY_1775.p01	a04b031c37c06570dd644ef46d09ac8c_2412	2cf5bec40a3ef4476bf46f509f729c16_3060	102e21fe2bbcace64a7555dd0bcc9007_3698	4a9cac2c1a817d9acdec143b653b9a80_4322	ac8fed72b32d7540cf9a1b9ac12df95a_3256	197b0243bc5bc4c380ecfb8919a026b1_3184	79ccbe49faa72747a800162f6a36c0ca_4332	614e29224da4f337b8899b3142d81070_3667	d977e7edc1a56720a787e465ab4ce472_3110	e653c257947c2dd0a414de7cb159ba14_2723	31e4ba73e5ddb8c85dea419204f0df5a_4236	752b3971131f3206662b5e22da3b23aa_4422	83683a6c7ca473684645e0830a47223d_3420	03da1bd30b32560bef8e38ea7761d9fe_2965	c648bd7c3a222aa51bed3e3836bcf8c8_4970	B9T21_04835.p01	B9T15_06970.p01	B9T14_06940.p01	B9T11_02915.p01	B9T12_07705.p01	B9T18_05610.p01	B9T13_05645.p01	F387_00645.p01	A6V30_09790.p01
rpoN		RNA polymerase factor sigma-54	26	26	1	1	3468				1397	1457	1452	B9T10_07120.p01	BMY_1783.p01	a04b031c37c06570dd644ef46d09ac8c_2380	2cf5bec40a3ef4476bf46f509f729c16_3092	102e21fe2bbcace64a7555dd0bcc9007_3730	4a9cac2c1a817d9acdec143b653b9a80_4354	ac8fed72b32d7540cf9a1b9ac12df95a_3224	197b0243bc5bc4c380ecfb8919a026b1_3216	79ccbe49faa72747a800162f6a36c0ca_4364	614e29224da4f337b8899b3142d81070_3635	d977e7edc1a56720a787e465ab4ce472_3142	e653c257947c2dd0a414de7cb159ba14_2691	31e4ba73e5ddb8c85dea419204f0df5a_4268	752b3971131f3206662b5e22da3b23aa_4454	83683a6c7ca473684645e0830a47223d_3452	03da1bd30b32560bef8e38ea7761d9fe_2933	c648bd7c3a222aa51bed3e3836bcf8c8_5002	B9T21_04875.p01	B9T15_07010.p01	B9T14_06980.p01	B9T11_02875.p01	B9T12_07745.p01	B9T18_05570.p01	B9T13_05685.p01	F387_00637.p01	A6V30_09830.p01
plsY		glycerol-3-phosphate 1-O-acyltransferase PlsY	26	26	1	1	3467				602	620	619	B9T10_07125.p01	BMY_1784.p01	a04b031c37c06570dd644ef46d09ac8c_2376	2cf5bec40a3ef4476bf46f509f729c16_3096	102e21fe2bbcace64a7555dd0bcc9007_3734	4a9cac2c1a817d9acdec143b653b9a80_4358	ac8fed72b32d7540cf9a1b9ac12df95a_3220	197b0243bc5bc4c380ecfb8919a026b1_3220	79ccbe49faa72747a800162f6a36c0ca_4368	614e29224da4f337b8899b3142d81070_3631	d977e7edc1a56720a787e465ab4ce472_3146	e653c257947c2dd0a414de7cb159ba14_2687	31e4ba73e5ddb8c85dea419204f0df5a_4272	752b3971131f3206662b5e22da3b23aa_4458	83683a6c7ca473684645e0830a47223d_3456	03da1bd30b32560bef8e38ea7761d9fe_2929	c648bd7c3a222aa51bed3e3836bcf8c8_5006	B9T21_04880.p01	B9T15_07015.p01	B9T14_06985.p01	B9T11_02870.p01	B9T12_07750.p01	B9T18_05565.p01	B9T13_05690.p01	F387_00636.p01	A6V30_09835.p01
B9T21_04910		DUF1090 domain-containing protein	26	26	1	1	3461				434	434	434	B9T10_07155.p01	BMY_1790.p01	a04b031c37c06570dd644ef46d09ac8c_2352	2cf5bec40a3ef4476bf46f509f729c16_3120	102e21fe2bbcace64a7555dd0bcc9007_3758	4a9cac2c1a817d9acdec143b653b9a80_4382	ac8fed72b32d7540cf9a1b9ac12df95a_3196	197b0243bc5bc4c380ecfb8919a026b1_3244	79ccbe49faa72747a800162f6a36c0ca_4392	614e29224da4f337b8899b3142d81070_3607	d977e7edc1a56720a787e465ab4ce472_3170	e653c257947c2dd0a414de7cb159ba14_2663	31e4ba73e5ddb8c85dea419204f0df5a_4296	752b3971131f3206662b5e22da3b23aa_4482	83683a6c7ca473684645e0830a47223d_3480	03da1bd30b32560bef8e38ea7761d9fe_2905	c648bd7c3a222aa51bed3e3836bcf8c8_5030	B9T21_04910.p01	B9T15_07045.p01	B9T14_07015.p01	B9T11_02840.p01	B9T12_07780.p01	B9T18_05535.p01	B9T13_05720.p01	F387_00630.p01	A6V30_09865.p01
uvrD		DNA helicase II	26	26	1	1	3460				2183	2237	2186	B9T10_07160.p01	BMY_1791.p01	a04b031c37c06570dd644ef46d09ac8c_2348	2cf5bec40a3ef4476bf46f509f729c16_3124	102e21fe2bbcace64a7555dd0bcc9007_3762	4a9cac2c1a817d9acdec143b653b9a80_4386	ac8fed72b32d7540cf9a1b9ac12df95a_3192	197b0243bc5bc4c380ecfb8919a026b1_3248	79ccbe49faa72747a800162f6a36c0ca_4396	614e29224da4f337b8899b3142d81070_3603	d977e7edc1a56720a787e465ab4ce472_3174	e653c257947c2dd0a414de7cb159ba14_2659	31e4ba73e5ddb8c85dea419204f0df5a_4300	752b3971131f3206662b5e22da3b23aa_4486	83683a6c7ca473684645e0830a47223d_3484	03da1bd30b32560bef8e38ea7761d9fe_2901	c648bd7c3a222aa51bed3e3836bcf8c8_5034	B9T21_04915.p01	B9T15_07050.p01	B9T14_07020.p01	B9T11_02835.p01	B9T12_07785.p01	B9T18_05530.p01	B9T13_05725.p01	F387_00629.p01	A6V30_09870.p01
B9T18_05500		tetratricopeptide repeat protein	26	26	1	1	3454				617	617	617	B9T10_07190.p01	BMY_1797.p01	a04b031c37c06570dd644ef46d09ac8c_2324	2cf5bec40a3ef4476bf46f509f729c16_3148	102e21fe2bbcace64a7555dd0bcc9007_3786	4a9cac2c1a817d9acdec143b653b9a80_4410	ac8fed72b32d7540cf9a1b9ac12df95a_3168	197b0243bc5bc4c380ecfb8919a026b1_3272	79ccbe49faa72747a800162f6a36c0ca_4420	614e29224da4f337b8899b3142d81070_3579	d977e7edc1a56720a787e465ab4ce472_3198	e653c257947c2dd0a414de7cb159ba14_2635	31e4ba73e5ddb8c85dea419204f0df5a_4324	752b3971131f3206662b5e22da3b23aa_4510	83683a6c7ca473684645e0830a47223d_3508	03da1bd30b32560bef8e38ea7761d9fe_2877	c648bd7c3a222aa51bed3e3836bcf8c8_5058	B9T21_04945.p01	B9T15_07080.p01	B9T14_07050.p01	B9T11_02805.p01	B9T12_07815.p01	B9T18_05500.p01	B9T13_05755.p01	F387_00623.p01	A6V30_09900.p01
A6V30_07720		DUF481 domain-containing protein	26	26	1	1	479				1004	1040	1038	B9T10_07345.p01	BMY_1808.p01	a04b031c37c06570dd644ef46d09ac8c_7235	2cf5bec40a3ef4476bf46f509f729c16_7298	102e21fe2bbcace64a7555dd0bcc9007_7181	4a9cac2c1a817d9acdec143b653b9a80_7768	ac8fed72b32d7540cf9a1b9ac12df95a_7139	197b0243bc5bc4c380ecfb8919a026b1_7267	79ccbe49faa72747a800162f6a36c0ca_7253	614e29224da4f337b8899b3142d81070_3535	d977e7edc1a56720a787e465ab4ce472_3242	e653c257947c2dd0a414de7cb159ba14_2591	31e4ba73e5ddb8c85dea419204f0df5a_7570	752b3971131f3206662b5e22da3b23aa_6869	83683a6c7ca473684645e0830a47223d_3552	03da1bd30b32560bef8e38ea7761d9fe_7222	c648bd7c3a222aa51bed3e3836bcf8c8_7299	B9T21_09330.p01	B9T15_07185.p01	B9T14_07155.p01	B9T11_09905.p01	B9T12_09610.p01	B9T18_05415.p01	B9T13_05845.p01	F387_01900.p01	A6V30_07720.p01
B9T18_05390		acyloxyacyl hydrolase	26	26	1	1	474				485	497	496	B9T10_07370.p01	BMY_1813.p01	a04b031c37c06570dd644ef46d09ac8c_7215	2cf5bec40a3ef4476bf46f509f729c16_7278	102e21fe2bbcace64a7555dd0bcc9007_7161	4a9cac2c1a817d9acdec143b653b9a80_7181	ac8fed72b32d7540cf9a1b9ac12df95a_7119	197b0243bc5bc4c380ecfb8919a026b1_7247	79ccbe49faa72747a800162f6a36c0ca_7272	614e29224da4f337b8899b3142d81070_3515	d977e7edc1a56720a787e465ab4ce472_3262	e653c257947c2dd0a414de7cb159ba14_2571	31e4ba73e5ddb8c85dea419204f0df5a_7551	752b3971131f3206662b5e22da3b23aa_6849	83683a6c7ca473684645e0830a47223d_3572	03da1bd30b32560bef8e38ea7761d9fe_7202	c648bd7c3a222aa51bed3e3836bcf8c8_7319	B9T21_09355.p01	B9T15_07210.p01	B9T14_07180.p01	B9T11_09880.p01	B9T12_09585.p01	B9T18_05390.p01	B9T13_05870.p01	F387_01895.p01	A6V30_07695.p01
B9T13_05890		hypothetical protein	26	26	1	1	470				449	449	449	B9T10_07390.p01	BMY_1817.p01	a04b031c37c06570dd644ef46d09ac8c_7199	2cf5bec40a3ef4476bf46f509f729c16_7262	102e21fe2bbcace64a7555dd0bcc9007_7145	4a9cac2c1a817d9acdec143b653b9a80_7197	ac8fed72b32d7540cf9a1b9ac12df95a_7104	197b0243bc5bc4c380ecfb8919a026b1_7231	79ccbe49faa72747a800162f6a36c0ca_7288	614e29224da4f337b8899b3142d81070_3499	d977e7edc1a56720a787e465ab4ce472_3278	e653c257947c2dd0a414de7cb159ba14_2555	31e4ba73e5ddb8c85dea419204f0df5a_7535	752b3971131f3206662b5e22da3b23aa_6833	83683a6c7ca473684645e0830a47223d_3588	03da1bd30b32560bef8e38ea7761d9fe_7186	c648bd7c3a222aa51bed3e3836bcf8c8_7335	B9T21_09375.p01	B9T15_07230.p01	B9T14_07200.p01	B9T11_09860.p01	B9T12_09565.p01	B9T18_05370.p01	B9T13_05890.p01	F387_01891.p01	A6V30_07675.p01
murD		UDP-N-acetylmuramoyl-L-alanine--D-glutamate ligase	26	26	1	1	469				1376	1376	1376	B9T10_07395.p01	BMY_1818.p01	a04b031c37c06570dd644ef46d09ac8c_7195	2cf5bec40a3ef4476bf46f509f729c16_7258	102e21fe2bbcace64a7555dd0bcc9007_7141	4a9cac2c1a817d9acdec143b653b9a80_7201	ac8fed72b32d7540cf9a1b9ac12df95a_7101	197b0243bc5bc4c380ecfb8919a026b1_7227	79ccbe49faa72747a800162f6a36c0ca_7292	614e29224da4f337b8899b3142d81070_3495	d977e7edc1a56720a787e465ab4ce472_3282	e653c257947c2dd0a414de7cb159ba14_2551	31e4ba73e5ddb8c85dea419204f0df5a_7531	752b3971131f3206662b5e22da3b23aa_6829	83683a6c7ca473684645e0830a47223d_3592	03da1bd30b32560bef8e38ea7761d9fe_7182	c648bd7c3a222aa51bed3e3836bcf8c8_7339	B9T21_09380.p01	B9T15_07235.p01	B9T14_07205.p01	B9T11_09855.p01	B9T12_09560.p01	B9T18_05365.p01	B9T13_05895.p01	F387_01890.p01	A6V30_07670.p01
ftsZ		cell division protein FtsZ	26	26	1	1	462				1028	1124	1120	B9T10_07430.p01	BMY_1826.p01	a04b031c37c06570dd644ef46d09ac8c_7167	2cf5bec40a3ef4476bf46f509f729c16_7230	102e21fe2bbcace64a7555dd0bcc9007_7113	4a9cac2c1a817d9acdec143b653b9a80_7229	ac8fed72b32d7540cf9a1b9ac12df95a_7073	197b0243bc5bc4c380ecfb8919a026b1_7199	79ccbe49faa72747a800162f6a36c0ca_7320	614e29224da4f337b8899b3142d81070_3467	d977e7edc1a56720a787e465ab4ce472_3310	e653c257947c2dd0a414de7cb159ba14_2523	31e4ba73e5ddb8c85dea419204f0df5a_7503	752b3971131f3206662b5e22da3b23aa_6801	83683a6c7ca473684645e0830a47223d_3620	03da1bd30b32560bef8e38ea7761d9fe_7154	c648bd7c3a222aa51bed3e3836bcf8c8_7366	B9T21_09415.p01	B9T15_07270.p01	B9T14_07240.p01	B9T11_09820.p01	B9T12_09525.p01	B9T18_05330.p01	B9T13_05930.p01	F387_01883.p01	A6V30_07635.p01
ruvA		Holliday junction branch migration protein RuvA	26	26	1	1	450				596	596	596	B9T10_07485.p01	BMY_1837.p01	a04b031c37c06570dd644ef46d09ac8c_7123	2cf5bec40a3ef4476bf46f509f729c16_7186	102e21fe2bbcace64a7555dd0bcc9007_7070	4a9cac2c1a817d9acdec143b653b9a80_7272	ac8fed72b32d7540cf9a1b9ac12df95a_7029	197b0243bc5bc4c380ecfb8919a026b1_7155	79ccbe49faa72747a800162f6a36c0ca_7363	614e29224da4f337b8899b3142d81070_3423	d977e7edc1a56720a787e465ab4ce472_3354	e653c257947c2dd0a414de7cb159ba14_2479	31e4ba73e5ddb8c85dea419204f0df5a_7459	752b3971131f3206662b5e22da3b23aa_6757	83683a6c7ca473684645e0830a47223d_3664	03da1bd30b32560bef8e38ea7761d9fe_7110	c648bd7c3a222aa51bed3e3836bcf8c8_7409	B9T21_09470.p01	B9T15_07325.p01	B9T14_07295.p01	B9T11_09765.p01	B9T12_09470.p01	B9T18_05275.p01	B9T13_05985.p01	F387_01872.p01	A6V30_07580.p01
B143_RS0109450		ATP-dependent zinc protease	26	26	1	1	449				521	557	555	B9T10_07490.p01	BMY_1838.p01	a04b031c37c06570dd644ef46d09ac8c_7119	2cf5bec40a3ef4476bf46f509f729c16_7182	102e21fe2bbcace64a7555dd0bcc9007_7066	4a9cac2c1a817d9acdec143b653b9a80_7276	ac8fed72b32d7540cf9a1b9ac12df95a_7025	197b0243bc5bc4c380ecfb8919a026b1_7151	79ccbe49faa72747a800162f6a36c0ca_7367	614e29224da4f337b8899b3142d81070_3419	d977e7edc1a56720a787e465ab4ce472_3358	e653c257947c2dd0a414de7cb159ba14_2475	31e4ba73e5ddb8c85dea419204f0df5a_7455	752b3971131f3206662b5e22da3b23aa_6753	83683a6c7ca473684645e0830a47223d_3668	03da1bd30b32560bef8e38ea7761d9fe_7106	c648bd7c3a222aa51bed3e3836bcf8c8_7413	B9T21_09475.p01	B9T15_07330.p01	B9T14_07300.p01	B9T11_09760.p01	B9T12_09465.p01	B9T18_05270.p01	B9T13_05990.p01	F387_01871.p01	A6V30_07575.p01
B9T21_09515		MFS transporter	26	26	1	1	445				1409	1451	1410	B9T10_07530.p01	BMY_1846.p01	a04b031c37c06570dd644ef46d09ac8c_7091	2cf5bec40a3ef4476bf46f509f729c16_7154	102e21fe2bbcace64a7555dd0bcc9007_7038	4a9cac2c1a817d9acdec143b653b9a80_7303	ac8fed72b32d7540cf9a1b9ac12df95a_6997	197b0243bc5bc4c380ecfb8919a026b1_7124	79ccbe49faa72747a800162f6a36c0ca_7605	614e29224da4f337b8899b3142d81070_7955	d977e7edc1a56720a787e465ab4ce472_3386	e653c257947c2dd0a414de7cb159ba14_2447	31e4ba73e5ddb8c85dea419204f0df5a_7789	752b3971131f3206662b5e22da3b23aa_6726	83683a6c7ca473684645e0830a47223d_3696	03da1bd30b32560bef8e38ea7761d9fe_7078	c648bd7c3a222aa51bed3e3836bcf8c8_7441	B9T21_09515.p01	B9T15_07370.p01	B9T14_07340.p01	B9T11_09720.p01	B9T12_09425.p01	B9T18_05230.p01	B9T13_06030.p01	F387_01863.p01	A6V30_07535.p01
B9T14_07375		thiol:disulfide interchange protein DsbA/DsbL	26	26	1	1	438				659	674	668	B9T10_07565.p01	BMY_1853.p01	a04b031c37c06570dd644ef46d09ac8c_7063	2cf5bec40a3ef4476bf46f509f729c16_7127	102e21fe2bbcace64a7555dd0bcc9007_7011	4a9cac2c1a817d9acdec143b653b9a80_7331	ac8fed72b32d7540cf9a1b9ac12df95a_6969	197b0243bc5bc4c380ecfb8919a026b1_7096	79ccbe49faa72747a800162f6a36c0ca_7633	614e29224da4f337b8899b3142d81070_7927	d977e7edc1a56720a787e465ab4ce472_3414	e653c257947c2dd0a414de7cb159ba14_2419	31e4ba73e5ddb8c85dea419204f0df5a_7761	752b3971131f3206662b5e22da3b23aa_6698	83683a6c7ca473684645e0830a47223d_3724	03da1bd30b32560bef8e38ea7761d9fe_7050	c648bd7c3a222aa51bed3e3836bcf8c8_7469	B9T21_09550.p01	B9T15_07405.p01	B9T14_07375.p01	B9T11_09685.p01	B9T12_09390.p01	B9T18_05195.p01	B9T13_06065.p01	F387_01856.p01	A6V30_07500.p01
dnaQ		DNA polymerase III subunit epsilon	26	26	1	1	434				680	680	680	B9T10_07585.p01	BMY_1857.p01	a04b031c37c06570dd644ef46d09ac8c_7047	2cf5bec40a3ef4476bf46f509f729c16_7111	102e21fe2bbcace64a7555dd0bcc9007_6995	4a9cac2c1a817d9acdec143b653b9a80_7347	ac8fed72b32d7540cf9a1b9ac12df95a_6954	197b0243bc5bc4c380ecfb8919a026b1_7080	79ccbe49faa72747a800162f6a36c0ca_7649	614e29224da4f337b8899b3142d81070_7911	d977e7edc1a56720a787e465ab4ce472_3430	e653c257947c2dd0a414de7cb159ba14_2403	31e4ba73e5ddb8c85dea419204f0df5a_7745	752b3971131f3206662b5e22da3b23aa_6682	83683a6c7ca473684645e0830a47223d_3740	03da1bd30b32560bef8e38ea7761d9fe_7034	c648bd7c3a222aa51bed3e3836bcf8c8_7485	B9T21_09570.p01	B9T15_07425.p01	B9T14_07395.p01	B9T11_09665.p01	B9T12_09370.p01	B9T18_05175.p01	B9T13_06085.p01	F387_01852.p01	A6V30_07480.p01
B9T12_09340		hypothetical protein	26	26	1	1	428				1529	1589	1586	B9T10_07615.p01	BMY_1863.p01	a04b031c37c06570dd644ef46d09ac8c_7023	2cf5bec40a3ef4476bf46f509f729c16_7088	102e21fe2bbcace64a7555dd0bcc9007_6972	4a9cac2c1a817d9acdec143b653b9a80_7371	ac8fed72b32d7540cf9a1b9ac12df95a_6931	197b0243bc5bc4c380ecfb8919a026b1_7056	79ccbe49faa72747a800162f6a36c0ca_7673	614e29224da4f337b8899b3142d81070_7887	d977e7edc1a56720a787e465ab4ce472_3454	e653c257947c2dd0a414de7cb159ba14_2379	31e4ba73e5ddb8c85dea419204f0df5a_7721	752b3971131f3206662b5e22da3b23aa_6659	83683a6c7ca473684645e0830a47223d_3764	03da1bd30b32560bef8e38ea7761d9fe_7012	c648bd7c3a222aa51bed3e3836bcf8c8_7509	B9T21_09600.p01	B9T15_07455.p01	B9T14_07425.p01	B9T11_09635.p01	B9T12_09340.p01	B9T18_05145.p01	B9T13_06115.p01	F387_01846.p01	A6V30_07450.p01
J7602_04365		VOC family protein	26	26	1	1	425				407	425	424	B9T10_07630.p01	BMY_1866.p01	a04b031c37c06570dd644ef46d09ac8c_7011	2cf5bec40a3ef4476bf46f509f729c16_7076	102e21fe2bbcace64a7555dd0bcc9007_6960	4a9cac2c1a817d9acdec143b653b9a80_7382	ac8fed72b32d7540cf9a1b9ac12df95a_6920	197b0243bc5bc4c380ecfb8919a026b1_7044	79ccbe49faa72747a800162f6a36c0ca_7685	614e29224da4f337b8899b3142d81070_7875	d977e7edc1a56720a787e465ab4ce472_3466	e653c257947c2dd0a414de7cb159ba14_2367	31e4ba73e5ddb8c85dea419204f0df5a_7709	752b3971131f3206662b5e22da3b23aa_6647	83683a6c7ca473684645e0830a47223d_3776	03da1bd30b32560bef8e38ea7761d9fe_7000	c648bd7c3a222aa51bed3e3836bcf8c8_7521	B9T21_09615.p01	B9T15_07470.p01	B9T14_07440.p01	B9T11_09620.p01	B9T12_09325.p01	B9T18_05130.p01	B9T13_06130.p01	F387_01843.p01	A6V30_07435.p01
B9T18_07570		ABC transporter permease	26	26	1	1	755				1160	1184	1183	B9T10_07660.p01	BMY_1198.p01	a04b031c37c06570dd644ef46d09ac8c_2264	2cf5bec40a3ef4476bf46f509f729c16_1308	102e21fe2bbcace64a7555dd0bcc9007_1804	4a9cac2c1a817d9acdec143b653b9a80_6423	ac8fed72b32d7540cf9a1b9ac12df95a_2227	197b0243bc5bc4c380ecfb8919a026b1_2351	79ccbe49faa72747a800162f6a36c0ca_2622	614e29224da4f337b8899b3142d81070_3392	d977e7edc1a56720a787e465ab4ce472_4515	e653c257947c2dd0a414de7cb159ba14_4498	31e4ba73e5ddb8c85dea419204f0df5a_3405	752b3971131f3206662b5e22da3b23aa_2660	83683a6c7ca473684645e0830a47223d_3800	03da1bd30b32560bef8e38ea7761d9fe_1876	c648bd7c3a222aa51bed3e3836bcf8c8_6306	B9T21_05025.p01	B9T15_07500.p01	B9T14_07470.p01	B9T11_10065.p01	B9T12_04910.p01	B9T18_07570.p01	B9T13_06165.p01	F387_01775.p01	A6V30_00025.p01
lhgO		L-2-hydroxyglutarate oxidase	26	26	1	1	759				1169	1214	1212	B9T10_07675.p01	BMY_1195.p01	a04b031c37c06570dd644ef46d09ac8c_2252	2cf5bec40a3ef4476bf46f509f729c16_1320	102e21fe2bbcace64a7555dd0bcc9007_1816	4a9cac2c1a817d9acdec143b653b9a80_6411	ac8fed72b32d7540cf9a1b9ac12df95a_2239	197b0243bc5bc4c380ecfb8919a026b1_2339	79ccbe49faa72747a800162f6a36c0ca_2634	614e29224da4f337b8899b3142d81070_3380	d977e7edc1a56720a787e465ab4ce472_4503	e653c257947c2dd0a414de7cb159ba14_4486	31e4ba73e5ddb8c85dea419204f0df5a_3393	752b3971131f3206662b5e22da3b23aa_2672	83683a6c7ca473684645e0830a47223d_3812	03da1bd30b32560bef8e38ea7761d9fe_1888	c648bd7c3a222aa51bed3e3836bcf8c8_6294	B9T21_05040.p01	B9T15_07515.p01	B9T14_07485.p01	B9T11_10050.p01	B9T12_04925.p01	B9T18_07585.p01	B9T13_06180.p01	F387_01778.p01	A6V30_00040.p01
cadR		Cd(II)/Pb(II)-responsive transcriptional regulator	26	26	1	1	767				428	428	428	B9T10_07710.p01	BMY_1185.p01	a04b031c37c06570dd644ef46d09ac8c_2224	2cf5bec40a3ef4476bf46f509f729c16_1348	102e21fe2bbcace64a7555dd0bcc9007_1844	4a9cac2c1a817d9acdec143b653b9a80_6383	ac8fed72b32d7540cf9a1b9ac12df95a_2267	197b0243bc5bc4c380ecfb8919a026b1_2311	79ccbe49faa72747a800162f6a36c0ca_2662	614e29224da4f337b8899b3142d81070_3352	d977e7edc1a56720a787e465ab4ce472_4475	e653c257947c2dd0a414de7cb159ba14_4458	31e4ba73e5ddb8c85dea419204f0df5a_3365	752b3971131f3206662b5e22da3b23aa_2700	83683a6c7ca473684645e0830a47223d_3840	03da1bd30b32560bef8e38ea7761d9fe_1916	c648bd7c3a222aa51bed3e3836bcf8c8_6266	B9T21_05075.p01	B9T15_07550.p01	B9T14_07520.p01	B9T11_10015.p01	B9T12_04960.p01	B9T18_07620.p01	B9T13_06215.p01	F387_01786.p01	A6V30_00075.p01
csiD		carbon starvation induced protein CsiD	26	26	1	1	768				917	917	917	B9T10_07715.p01	BMY_1184.p01	a04b031c37c06570dd644ef46d09ac8c_2220	2cf5bec40a3ef4476bf46f509f729c16_1352	102e21fe2bbcace64a7555dd0bcc9007_1848	4a9cac2c1a817d9acdec143b653b9a80_6379	ac8fed72b32d7540cf9a1b9ac12df95a_2271	197b0243bc5bc4c380ecfb8919a026b1_2307	79ccbe49faa72747a800162f6a36c0ca_2666	614e29224da4f337b8899b3142d81070_3348	d977e7edc1a56720a787e465ab4ce472_4471	e653c257947c2dd0a414de7cb159ba14_4454	31e4ba73e5ddb8c85dea419204f0df5a_3361	752b3971131f3206662b5e22da3b23aa_2704	83683a6c7ca473684645e0830a47223d_3844	03da1bd30b32560bef8e38ea7761d9fe_1920	c648bd7c3a222aa51bed3e3836bcf8c8_6262	B9T21_05080.p01	B9T15_07555.p01	B9T14_07525.p01	B9T11_10010.p01	B9T12_04965.p01	B9T18_07625.p01	B9T13_06220.p01	F387_01787.p01	A6V30_00080.p01
J7553_02930		mechanosensitive ion channel family protein	26	26	1	1	785				962	1016	1012	B9T10_07790.p01	BMY_1171.p01	a04b031c37c06570dd644ef46d09ac8c_2155	2cf5bec40a3ef4476bf46f509f729c16_1413	102e21fe2bbcace64a7555dd0bcc9007_1901	4a9cac2c1a817d9acdec143b653b9a80_6326	ac8fed72b32d7540cf9a1b9ac12df95a_2328	197b0243bc5bc4c380ecfb8919a026b1_2246	79ccbe49faa72747a800162f6a36c0ca_2719	614e29224da4f337b8899b3142d81070_3295	d977e7edc1a56720a787e465ab4ce472_4418	e653c257947c2dd0a414de7cb159ba14_4401	31e4ba73e5ddb8c85dea419204f0df5a_3300	752b3971131f3206662b5e22da3b23aa_2769	83683a6c7ca473684645e0830a47223d_3897	03da1bd30b32560bef8e38ea7761d9fe_1985	c648bd7c3a222aa51bed3e3836bcf8c8_6209	B9T21_05160.p01	B9T15_07620.p01	B9T14_07590.p01	B9T11_09945.p01	B9T12_05030.p01	B9T18_07690.p01	B9T13_06285.p01	F387_01800.p01	A6V30_00150.p01
B9T10_07795		PTS sugar transporter subunit IIC	26	26	1	1	786				962	1016	1013	B9T10_07795.p01	BMY_1170.p01	a04b031c37c06570dd644ef46d09ac8c_2151	2cf5bec40a3ef4476bf46f509f729c16_1417	102e21fe2bbcace64a7555dd0bcc9007_1905	4a9cac2c1a817d9acdec143b653b9a80_6322	ac8fed72b32d7540cf9a1b9ac12df95a_2332	197b0243bc5bc4c380ecfb8919a026b1_2242	79ccbe49faa72747a800162f6a36c0ca_2723	614e29224da4f337b8899b3142d81070_3291	d977e7edc1a56720a787e465ab4ce472_4414	e653c257947c2dd0a414de7cb159ba14_4397	31e4ba73e5ddb8c85dea419204f0df5a_3296	752b3971131f3206662b5e22da3b23aa_2773	83683a6c7ca473684645e0830a47223d_3901	03da1bd30b32560bef8e38ea7761d9fe_1989	c648bd7c3a222aa51bed3e3836bcf8c8_6205	B9T21_05165.p01	B9T15_07625.p01	B9T14_07595.p01	B9T11_09940.p01	B9T12_05035.p01	B9T18_07695.p01	B9T13_06290.p01	F387_01801.p01	A6V30_00155.p01
B9T11_07695		amidohydrolase	26	26	1	1	852				1631	1631	1631	B9T10_07955.p01	BMY_1148.p01	a04b031c37c06570dd644ef46d09ac8c_2120	2cf5bec40a3ef4476bf46f509f729c16_1524	102e21fe2bbcace64a7555dd0bcc9007_2060	4a9cac2c1a817d9acdec143b653b9a80_6168	ac8fed72b32d7540cf9a1b9ac12df95a_2363	197b0243bc5bc4c380ecfb8919a026b1_2163	79ccbe49faa72747a800162f6a36c0ca_2758	614e29224da4f337b8899b3142d81070_3162	d977e7edc1a56720a787e465ab4ce472_4285	e653c257947c2dd0a414de7cb159ba14_4268	31e4ba73e5ddb8c85dea419204f0df5a_3173	752b3971131f3206662b5e22da3b23aa_2868	83683a6c7ca473684645e0830a47223d_4030	03da1bd30b32560bef8e38ea7761d9fe_2060	c648bd7c3a222aa51bed3e3836bcf8c8_6170	B9T21_05210.p01	B9T15_07740.p01	B9T14_07710.p01	B9T11_07695.p01	B9T12_05120.p01	B9T18_07790.p01	B9T13_06405.p01	F387_01830.p01	A6V30_00290.p01
B9T14_07720		hypothetical protein	26	26	1	1	854				308	308	308	B9T10_07965.p01	BMY_1146.p01	a04b031c37c06570dd644ef46d09ac8c_2112	2cf5bec40a3ef4476bf46f509f729c16_1532	102e21fe2bbcace64a7555dd0bcc9007_2068	4a9cac2c1a817d9acdec143b653b9a80_6160	ac8fed72b32d7540cf9a1b9ac12df95a_2371	197b0243bc5bc4c380ecfb8919a026b1_2155	79ccbe49faa72747a800162f6a36c0ca_2766	614e29224da4f337b8899b3142d81070_3154	d977e7edc1a56720a787e465ab4ce472_4277	e653c257947c2dd0a414de7cb159ba14_4260	31e4ba73e5ddb8c85dea419204f0df5a_3165	752b3971131f3206662b5e22da3b23aa_2876	83683a6c7ca473684645e0830a47223d_4038	03da1bd30b32560bef8e38ea7761d9fe_2068	c648bd7c3a222aa51bed3e3836bcf8c8_6162	B9T21_05220.p01	B9T15_07750.p01	B9T14_07720.p01	B9T11_07685.p01	B9T12_05130.p01	B9T18_07800.p01	B9T13_06415.p01	F387_01832.p01	A6V30_00300.p01
nusG		transcription termination/antitermination protein NusG	26	26	1	1	861				479	527	525	B9T10_08015.p01	BMY_1136.p01	a04b031c37c06570dd644ef46d09ac8c_2076	2cf5bec40a3ef4476bf46f509f729c16_1568	102e21fe2bbcace64a7555dd0bcc9007_2104	4a9cac2c1a817d9acdec143b653b9a80_2475	ac8fed72b32d7540cf9a1b9ac12df95a_2407	197b0243bc5bc4c380ecfb8919a026b1_2119	79ccbe49faa72747a800162f6a36c0ca_2802	614e29224da4f337b8899b3142d81070_3118	d977e7edc1a56720a787e465ab4ce472_4241	e653c257947c2dd0a414de7cb159ba14_4224	31e4ba73e5ddb8c85dea419204f0df5a_3129	752b3971131f3206662b5e22da3b23aa_2912	83683a6c7ca473684645e0830a47223d_4074	03da1bd30b32560bef8e38ea7761d9fe_2104	c648bd7c3a222aa51bed3e3836bcf8c8_6126	B9T21_05270.p01	B9T15_07800.p01	B9T14_07770.p01	B9T11_07635.p01	B9T12_05180.p01	B9T18_07850.p01	B9T13_06465.p01	F387_00606.p01	A6V30_00350.p01
rplK		50S ribosomal protein L11	26	26	1	1	862				326	431	426	B9T10_08020.p01	BMY_1135.p01	a04b031c37c06570dd644ef46d09ac8c_2072	2cf5bec40a3ef4476bf46f509f729c16_1572	102e21fe2bbcace64a7555dd0bcc9007_2108	4a9cac2c1a817d9acdec143b653b9a80_2479	ac8fed72b32d7540cf9a1b9ac12df95a_2411	197b0243bc5bc4c380ecfb8919a026b1_2115	79ccbe49faa72747a800162f6a36c0ca_2806	614e29224da4f337b8899b3142d81070_3114	d977e7edc1a56720a787e465ab4ce472_4237	e653c257947c2dd0a414de7cb159ba14_4220	31e4ba73e5ddb8c85dea419204f0df5a_3125	752b3971131f3206662b5e22da3b23aa_2916	83683a6c7ca473684645e0830a47223d_4078	03da1bd30b32560bef8e38ea7761d9fe_2108	c648bd7c3a222aa51bed3e3836bcf8c8_6122	B9T21_05275.p01	B9T15_07805.p01	B9T14_07775.p01	B9T11_07630.p01	B9T12_05185.p01	B9T18_07855.p01	B9T13_06470.p01	F387_00605.p01	A6V30_00355.p01
rplL		50S ribosomal protein L7/L12	26	26	1	1	865				356	368	367	B9T10_08035.p01	BMY_1132.p01	a04b031c37c06570dd644ef46d09ac8c_2060	2cf5bec40a3ef4476bf46f509f729c16_1584	102e21fe2bbcace64a7555dd0bcc9007_2120	4a9cac2c1a817d9acdec143b653b9a80_2491	ac8fed72b32d7540cf9a1b9ac12df95a_2423	197b0243bc5bc4c380ecfb8919a026b1_2103	79ccbe49faa72747a800162f6a36c0ca_2818	614e29224da4f337b8899b3142d81070_3102	d977e7edc1a56720a787e465ab4ce472_4225	e653c257947c2dd0a414de7cb159ba14_4208	31e4ba73e5ddb8c85dea419204f0df5a_3113	752b3971131f3206662b5e22da3b23aa_2928	83683a6c7ca473684645e0830a47223d_4090	03da1bd30b32560bef8e38ea7761d9fe_2120	c648bd7c3a222aa51bed3e3836bcf8c8_6110	B9T21_05290.p01	B9T15_07820.p01	B9T14_07790.p01	B9T11_07615.p01	B9T12_05200.p01	B9T18_07870.p01	B9T13_06485.p01	F387_00602.p01	A6V30_00370.p01
J7607_03830		MipA/OmpV family protein	26	26	1	1	885				698	737	735	B9T10_08125.p01	BMY_1113.p01	a04b031c37c06570dd644ef46d09ac8c_1984	2cf5bec40a3ef4476bf46f509f729c16_1660	102e21fe2bbcace64a7555dd0bcc9007_2196	4a9cac2c1a817d9acdec143b653b9a80_2567	ac8fed72b32d7540cf9a1b9ac12df95a_2499	197b0243bc5bc4c380ecfb8919a026b1_2027	79ccbe49faa72747a800162f6a36c0ca_2894	614e29224da4f337b8899b3142d81070_3026	d977e7edc1a56720a787e465ab4ce472_4149	e653c257947c2dd0a414de7cb159ba14_4132	31e4ba73e5ddb8c85dea419204f0df5a_3037	752b3971131f3206662b5e22da3b23aa_3004	83683a6c7ca473684645e0830a47223d_4166	03da1bd30b32560bef8e38ea7761d9fe_2196	c648bd7c3a222aa51bed3e3836bcf8c8_6034	B9T21_05380.p01	B9T15_07910.p01	B9T14_07880.p01	B9T11_07525.p01	B9T12_05290.p01	B9T18_07960.p01	B9T13_06575.p01	F387_00583.p01	A6V30_00460.p01
J7558_02455		ABC transporter substrate-binding protein	26	26	1	1	893				854	854	854	B9T10_08165.p01	BMY_1104.p01	a04b031c37c06570dd644ef46d09ac8c_1952	2cf5bec40a3ef4476bf46f509f729c16_1692	102e21fe2bbcace64a7555dd0bcc9007_2228	4a9cac2c1a817d9acdec143b653b9a80_2599	ac8fed72b32d7540cf9a1b9ac12df95a_2531	197b0243bc5bc4c380ecfb8919a026b1_1995	79ccbe49faa72747a800162f6a36c0ca_2926	614e29224da4f337b8899b3142d81070_2994	d977e7edc1a56720a787e465ab4ce472_4117	e653c257947c2dd0a414de7cb159ba14_4100	31e4ba73e5ddb8c85dea419204f0df5a_3005	752b3971131f3206662b5e22da3b23aa_3036	83683a6c7ca473684645e0830a47223d_4198	03da1bd30b32560bef8e38ea7761d9fe_2228	c648bd7c3a222aa51bed3e3836bcf8c8_6006	B9T21_05420.p01	B9T15_07950.p01	B9T14_07920.p01	B9T11_07485.p01	B9T12_05330.p01	B9T18_08000.p01	B9T13_06615.p01	F387_00575.p01	A6V30_00495.p01
A6V30_00555		FAD-dependent monooxygenase	26	26	1	1	906				1169	1169	1169	B9T10_08225.p01	BMY_1091.p01	a04b031c37c06570dd644ef46d09ac8c_1904	2cf5bec40a3ef4476bf46f509f729c16_1740	102e21fe2bbcace64a7555dd0bcc9007_2276	4a9cac2c1a817d9acdec143b653b9a80_2647	ac8fed72b32d7540cf9a1b9ac12df95a_2579	197b0243bc5bc4c380ecfb8919a026b1_1947	79ccbe49faa72747a800162f6a36c0ca_2974	614e29224da4f337b8899b3142d81070_2946	d977e7edc1a56720a787e465ab4ce472_4069	e653c257947c2dd0a414de7cb159ba14_4052	31e4ba73e5ddb8c85dea419204f0df5a_2957	752b3971131f3206662b5e22da3b23aa_3084	83683a6c7ca473684645e0830a47223d_4246	03da1bd30b32560bef8e38ea7761d9fe_2276	c648bd7c3a222aa51bed3e3836bcf8c8_5958	B9T21_05480.p01	B9T15_08010.p01	B9T14_07980.p01	B9T11_07425.p01	B9T12_05390.p01	B9T18_08060.p01	B9T13_06675.p01	F387_00563.p01	A6V30_00555.p01
J7624_02870		hypothetical protein	26	26	1	1	908				338	338	338	B9T10_08235.p01	BMY_1089.p01	a04b031c37c06570dd644ef46d09ac8c_1896	2cf5bec40a3ef4476bf46f509f729c16_1748	102e21fe2bbcace64a7555dd0bcc9007_2284	4a9cac2c1a817d9acdec143b653b9a80_2655	ac8fed72b32d7540cf9a1b9ac12df95a_2587	197b0243bc5bc4c380ecfb8919a026b1_1939	79ccbe49faa72747a800162f6a36c0ca_2982	614e29224da4f337b8899b3142d81070_2938	d977e7edc1a56720a787e465ab4ce472_4061	e653c257947c2dd0a414de7cb159ba14_4044	31e4ba73e5ddb8c85dea419204f0df5a_2949	752b3971131f3206662b5e22da3b23aa_3092	83683a6c7ca473684645e0830a47223d_4254	03da1bd30b32560bef8e38ea7761d9fe_2284	c648bd7c3a222aa51bed3e3836bcf8c8_5950	B9T21_05490.p01	B9T15_08020.p01	B9T14_07990.p01	B9T11_07415.p01	B9T12_05400.p01	B9T18_08070.p01	B9T13_06685.p01	F387_00561.p01	A6V30_00565.p01
B9T11_07405		HIT domain-containing protein	26	26	1	1	910				410	410	410	B9T10_08245.p01	BMY_1087.p01	a04b031c37c06570dd644ef46d09ac8c_1888	2cf5bec40a3ef4476bf46f509f729c16_1756	102e21fe2bbcace64a7555dd0bcc9007_2292	4a9cac2c1a817d9acdec143b653b9a80_2663	ac8fed72b32d7540cf9a1b9ac12df95a_2595	197b0243bc5bc4c380ecfb8919a026b1_1931	79ccbe49faa72747a800162f6a36c0ca_2990	614e29224da4f337b8899b3142d81070_2930	d977e7edc1a56720a787e465ab4ce472_4053	e653c257947c2dd0a414de7cb159ba14_4036	31e4ba73e5ddb8c85dea419204f0df5a_2941	752b3971131f3206662b5e22da3b23aa_3100	83683a6c7ca473684645e0830a47223d_4262	03da1bd30b32560bef8e38ea7761d9fe_2292	c648bd7c3a222aa51bed3e3836bcf8c8_5942	B9T21_05500.p01	B9T15_08030.p01	B9T14_08000.p01	B9T11_07405.p01	B9T12_05410.p01	B9T18_08080.p01	B9T13_06695.p01	F387_00559.p01	A6V30_00575.p01
J7600_08775		response regulator transcription factor	26	26	1	1	2886				587	596	587	B9T10_04260.p01	BMY_0678.p01	a04b031c37c06570dd644ef46d09ac8c_5851	2cf5bec40a3ef4476bf46f509f729c16_5437	102e21fe2bbcace64a7555dd0bcc9007_5879	4a9cac2c1a817d9acdec143b653b9a80_5931	ac8fed72b32d7540cf9a1b9ac12df95a_1641	197b0243bc5bc4c380ecfb8919a026b1_6193	79ccbe49faa72747a800162f6a36c0ca_2028	614e29224da4f337b8899b3142d81070_6967	d977e7edc1a56720a787e465ab4ce472_6984	e653c257947c2dd0a414de7cb159ba14_6974	31e4ba73e5ddb8c85dea419204f0df5a_107	752b3971131f3206662b5e22da3b23aa_2282	83683a6c7ca473684645e0830a47223d_107	03da1bd30b32560bef8e38ea7761d9fe_5732	c648bd7c3a222aa51bed3e3836bcf8c8_681	B9T21_07015.p01	B9T15_00875.p01	B9T14_04155.p01	B9T11_05495.p01	B9T12_04185.p01	B9T18_00845.p01	B9T13_08170.p01	F387_01731.p01	A6V30_05085.p01
rpmF		50S ribosomal protein L32	26	26	1	1	915				152	194	192	B9T10_08270.p01	BMY_1082.p01	a04b031c37c06570dd644ef46d09ac8c_1868	2cf5bec40a3ef4476bf46f509f729c16_1776	102e21fe2bbcace64a7555dd0bcc9007_2312	4a9cac2c1a817d9acdec143b653b9a80_2683	ac8fed72b32d7540cf9a1b9ac12df95a_2615	197b0243bc5bc4c380ecfb8919a026b1_1911	79ccbe49faa72747a800162f6a36c0ca_3010	614e29224da4f337b8899b3142d81070_2910	d977e7edc1a56720a787e465ab4ce472_4033	e653c257947c2dd0a414de7cb159ba14_4016	31e4ba73e5ddb8c85dea419204f0df5a_2921	752b3971131f3206662b5e22da3b23aa_3120	83683a6c7ca473684645e0830a47223d_4282	03da1bd30b32560bef8e38ea7761d9fe_2312	c648bd7c3a222aa51bed3e3836bcf8c8_5922	B9T21_05525.p01	B9T15_08055.p01	B9T14_08025.p01	B9T11_07380.p01	B9T12_05435.p01	B9T18_08105.p01	B9T13_06720.p01	F387_00554.p01	A6V30_00600.p01
plsX		phosphate acyltransferase PlsX	26	26	1	1	916				1019	1055	1053	B9T10_08275.p01	BMY_1081.p01	a04b031c37c06570dd644ef46d09ac8c_1864	2cf5bec40a3ef4476bf46f509f729c16_1780	102e21fe2bbcace64a7555dd0bcc9007_2316	4a9cac2c1a817d9acdec143b653b9a80_2687	ac8fed72b32d7540cf9a1b9ac12df95a_2619	197b0243bc5bc4c380ecfb8919a026b1_1907	79ccbe49faa72747a800162f6a36c0ca_3014	614e29224da4f337b8899b3142d81070_2906	d977e7edc1a56720a787e465ab4ce472_4029	e653c257947c2dd0a414de7cb159ba14_4012	31e4ba73e5ddb8c85dea419204f0df5a_2917	752b3971131f3206662b5e22da3b23aa_3124	83683a6c7ca473684645e0830a47223d_4286	03da1bd30b32560bef8e38ea7761d9fe_2316	c648bd7c3a222aa51bed3e3836bcf8c8_5918	B9T21_05530.p01	B9T15_08060.p01	B9T14_08030.p01	B9T11_07375.p01	B9T12_05440.p01	B9T18_08110.p01	B9T13_06725.p01	F387_00553.p01	A6V30_00605.p01
J7606_05050		ketoacyl-ACP synthase III	26	26	1	1	917				908	953	951	B9T10_08280.p01	BMY_1080.p01	a04b031c37c06570dd644ef46d09ac8c_1860	2cf5bec40a3ef4476bf46f509f729c16_1784	102e21fe2bbcace64a7555dd0bcc9007_2320	4a9cac2c1a817d9acdec143b653b9a80_2691	ac8fed72b32d7540cf9a1b9ac12df95a_2623	197b0243bc5bc4c380ecfb8919a026b1_1903	79ccbe49faa72747a800162f6a36c0ca_3018	614e29224da4f337b8899b3142d81070_2902	d977e7edc1a56720a787e465ab4ce472_4025	e653c257947c2dd0a414de7cb159ba14_4008	31e4ba73e5ddb8c85dea419204f0df5a_2913	752b3971131f3206662b5e22da3b23aa_3128	83683a6c7ca473684645e0830a47223d_4290	03da1bd30b32560bef8e38ea7761d9fe_2320	c648bd7c3a222aa51bed3e3836bcf8c8_5914	B9T21_05535.p01	B9T15_08065.p01	B9T14_08035.p01	B9T11_07370.p01	B9T12_05445.p01	B9T18_08115.p01	B9T13_06730.p01	F387_00552.p01	A6V30_00610.p01
J7602_05035		Slp family lipoprotein	26	26	1	1	924				515	515	515	B9T10_08315.p01	BMY_1073.p01	a04b031c37c06570dd644ef46d09ac8c_1832	2cf5bec40a3ef4476bf46f509f729c16_1812	102e21fe2bbcace64a7555dd0bcc9007_2348	4a9cac2c1a817d9acdec143b653b9a80_2719	ac8fed72b32d7540cf9a1b9ac12df95a_2651	197b0243bc5bc4c380ecfb8919a026b1_1875	79ccbe49faa72747a800162f6a36c0ca_3046	614e29224da4f337b8899b3142d81070_2874	d977e7edc1a56720a787e465ab4ce472_3997	e653c257947c2dd0a414de7cb159ba14_3980	31e4ba73e5ddb8c85dea419204f0df5a_2885	752b3971131f3206662b5e22da3b23aa_3156	83683a6c7ca473684645e0830a47223d_4318	03da1bd30b32560bef8e38ea7761d9fe_2348	c648bd7c3a222aa51bed3e3836bcf8c8_5886	B9T21_05570.p01	B9T15_08100.p01	B9T14_08070.p01	B9T11_07335.p01	B9T12_05480.p01	B9T18_08150.p01	B9T13_06765.p01	F387_00545.p01	A6V30_00645.p01
J7607_03585		CBS domain-containing protein	26	26	1	1	935				746	845	841	B9T10_08370.p01	BMY_1062.p01	a04b031c37c06570dd644ef46d09ac8c_1788	2cf5bec40a3ef4476bf46f509f729c16_1856	102e21fe2bbcace64a7555dd0bcc9007_2392	4a9cac2c1a817d9acdec143b653b9a80_2763	ac8fed72b32d7540cf9a1b9ac12df95a_2695	197b0243bc5bc4c380ecfb8919a026b1_1831	79ccbe49faa72747a800162f6a36c0ca_3090	614e29224da4f337b8899b3142d81070_2830	d977e7edc1a56720a787e465ab4ce472_3953	e653c257947c2dd0a414de7cb159ba14_3936	31e4ba73e5ddb8c85dea419204f0df5a_2841	752b3971131f3206662b5e22da3b23aa_3200	83683a6c7ca473684645e0830a47223d_4362	03da1bd30b32560bef8e38ea7761d9fe_2392	c648bd7c3a222aa51bed3e3836bcf8c8_5842	B9T21_05625.p01	B9T15_08155.p01	B9T14_08125.p01	B9T11_07280.p01	B9T12_05535.p01	B9T18_08205.p01	B9T13_06820.p01	F387_00534.p01	A6V30_00700.p01
tolQ		protein TolQ	26	26	1	1	937				671	707	705	B9T10_08385.p01	BMY_1059.p01	a04b031c37c06570dd644ef46d09ac8c_1777	2cf5bec40a3ef4476bf46f509f729c16_1867	102e21fe2bbcace64a7555dd0bcc9007_2403	4a9cac2c1a817d9acdec143b653b9a80_2774	ac8fed72b32d7540cf9a1b9ac12df95a_2706	197b0243bc5bc4c380ecfb8919a026b1_1820	79ccbe49faa72747a800162f6a36c0ca_3101	614e29224da4f337b8899b3142d81070_2819	d977e7edc1a56720a787e465ab4ce472_3942	e653c257947c2dd0a414de7cb159ba14_3925	31e4ba73e5ddb8c85dea419204f0df5a_2830	752b3971131f3206662b5e22da3b23aa_3211	83683a6c7ca473684645e0830a47223d_4373	03da1bd30b32560bef8e38ea7761d9fe_2403	c648bd7c3a222aa51bed3e3836bcf8c8_5831	B9T21_05640.p01	B9T15_08170.p01	B9T14_08140.p01	B9T11_07265.p01	B9T12_05550.p01	B9T18_08220.p01	B9T13_06835.p01	F387_00531.p01	A6V30_00715.p01
rph		ribonuclease PH	26	26	1	1	944				683	713	709	B9T10_08415.p01	BMY_1053.p01	a04b031c37c06570dd644ef46d09ac8c_1754	2cf5bec40a3ef4476bf46f509f729c16_1890	102e21fe2bbcace64a7555dd0bcc9007_2426	4a9cac2c1a817d9acdec143b653b9a80_2797	ac8fed72b32d7540cf9a1b9ac12df95a_2729	197b0243bc5bc4c380ecfb8919a026b1_1797	79ccbe49faa72747a800162f6a36c0ca_3124	614e29224da4f337b8899b3142d81070_2796	d977e7edc1a56720a787e465ab4ce472_3919	e653c257947c2dd0a414de7cb159ba14_3902	31e4ba73e5ddb8c85dea419204f0df5a_2807	752b3971131f3206662b5e22da3b23aa_3234	83683a6c7ca473684645e0830a47223d_4396	03da1bd30b32560bef8e38ea7761d9fe_2426	c648bd7c3a222aa51bed3e3836bcf8c8_5808	B9T21_05670.p01	B9T15_08200.p01	B9T14_08170.p01	B9T11_07235.p01	B9T12_05580.p01	B9T18_08250.p01	B9T13_06865.p01	F387_00525.p01	A6V30_00745.p01
J7622_05580		hypothetical protein	26	26	1	1	951				653	653	653	B9T10_08455.p01	BMY_1045.p01	a04b031c37c06570dd644ef46d09ac8c_1723	2cf5bec40a3ef4476bf46f509f729c16_1921	102e21fe2bbcace64a7555dd0bcc9007_2457	4a9cac2c1a817d9acdec143b653b9a80_2828	ac8fed72b32d7540cf9a1b9ac12df95a_2760	197b0243bc5bc4c380ecfb8919a026b1_1766	79ccbe49faa72747a800162f6a36c0ca_3155	614e29224da4f337b8899b3142d81070_2765	d977e7edc1a56720a787e465ab4ce472_3888	e653c257947c2dd0a414de7cb159ba14_3871	31e4ba73e5ddb8c85dea419204f0df5a_2776	752b3971131f3206662b5e22da3b23aa_3265	83683a6c7ca473684645e0830a47223d_4427	03da1bd30b32560bef8e38ea7761d9fe_2457	c648bd7c3a222aa51bed3e3836bcf8c8_5777	B9T21_05710.p01	B9T15_08240.p01	B9T14_08210.p01	B9T11_07195.p01	B9T12_05620.p01	B9T18_08290.p01	B9T13_06905.p01	F387_00517.p01	A6V30_00785.p01
B9T18_08345		Rrf2 family transcriptional regulator	26	26	1	1	962				440	614	446	B9T10_08510.p01	BMY_1034.p01	a04b031c37c06570dd644ef46d09ac8c_1679	2cf5bec40a3ef4476bf46f509f729c16_1963	102e21fe2bbcace64a7555dd0bcc9007_2501	4a9cac2c1a817d9acdec143b653b9a80_2872	ac8fed72b32d7540cf9a1b9ac12df95a_2804	197b0243bc5bc4c380ecfb8919a026b1_1722	79ccbe49faa72747a800162f6a36c0ca_3197	614e29224da4f337b8899b3142d81070_2721	d977e7edc1a56720a787e465ab4ce472_3844	e653c257947c2dd0a414de7cb159ba14_3827	31e4ba73e5ddb8c85dea419204f0df5a_2732	752b3971131f3206662b5e22da3b23aa_3309	83683a6c7ca473684645e0830a47223d_4471	03da1bd30b32560bef8e38ea7761d9fe_2501	c648bd7c3a222aa51bed3e3836bcf8c8_5733	B9T21_05765.p01	B9T15_08295.p01	B9T14_08265.p01	B9T11_07140.p01	B9T12_05675.p01	B9T18_08345.p01	B9T13_06960.p01	F387_00506.p01	A6V30_00840.p01
F387_00501		transporter substrate-binding domain-containing protein	26	26	1	1	967				830	830	830	B9T10_08535.p01	BMY_1029.p01	a04b031c37c06570dd644ef46d09ac8c_1659	2cf5bec40a3ef4476bf46f509f729c16_1983	102e21fe2bbcace64a7555dd0bcc9007_2521	4a9cac2c1a817d9acdec143b653b9a80_2892	ac8fed72b32d7540cf9a1b9ac12df95a_2824	197b0243bc5bc4c380ecfb8919a026b1_1702	79ccbe49faa72747a800162f6a36c0ca_3217	614e29224da4f337b8899b3142d81070_2701	d977e7edc1a56720a787e465ab4ce472_3824	e653c257947c2dd0a414de7cb159ba14_3807	31e4ba73e5ddb8c85dea419204f0df5a_2712	752b3971131f3206662b5e22da3b23aa_3329	83683a6c7ca473684645e0830a47223d_4491	03da1bd30b32560bef8e38ea7761d9fe_2521	c648bd7c3a222aa51bed3e3836bcf8c8_5713	B9T21_05790.p01	B9T15_08320.p01	B9T14_08290.p01	B9T11_07115.p01	B9T12_05700.p01	B9T18_08370.p01	B9T13_06985.p01	F387_00501.p01	A6V30_00865.p01
J7561_03635		hypothetical protein	26	26	1	1	968				527	581	529	B9T10_08540.p01	BMY_1028.p01	a04b031c37c06570dd644ef46d09ac8c_1655	2cf5bec40a3ef4476bf46f509f729c16_1987	102e21fe2bbcace64a7555dd0bcc9007_2525	4a9cac2c1a817d9acdec143b653b9a80_2896	ac8fed72b32d7540cf9a1b9ac12df95a_2828	197b0243bc5bc4c380ecfb8919a026b1_1698	79ccbe49faa72747a800162f6a36c0ca_3221	614e29224da4f337b8899b3142d81070_2697	d977e7edc1a56720a787e465ab4ce472_3820	e653c257947c2dd0a414de7cb159ba14_3803	31e4ba73e5ddb8c85dea419204f0df5a_2708	752b3971131f3206662b5e22da3b23aa_3333	83683a6c7ca473684645e0830a47223d_4495	03da1bd30b32560bef8e38ea7761d9fe_2525	c648bd7c3a222aa51bed3e3836bcf8c8_5709	B9T21_05795.p01	B9T15_08325.p01	B9T14_08295.p01	B9T11_07110.p01	B9T12_05705.p01	B9T18_08375.p01	B9T13_06990.p01	F387_00500.p01	A6V30_00870.p01
J7561_03640		NAD(P)/FAD-dependent oxidoreductase	26	26	1	1	969				1196	1196	1196	B9T10_08545.p01	BMY_1027.p01	a04b031c37c06570dd644ef46d09ac8c_1651	2cf5bec40a3ef4476bf46f509f729c16_1991	102e21fe2bbcace64a7555dd0bcc9007_2529	4a9cac2c1a817d9acdec143b653b9a80_2900	ac8fed72b32d7540cf9a1b9ac12df95a_2832	197b0243bc5bc4c380ecfb8919a026b1_1694	79ccbe49faa72747a800162f6a36c0ca_3225	614e29224da4f337b8899b3142d81070_2693	d977e7edc1a56720a787e465ab4ce472_3816	e653c257947c2dd0a414de7cb159ba14_3799	31e4ba73e5ddb8c85dea419204f0df5a_2704	752b3971131f3206662b5e22da3b23aa_3337	83683a6c7ca473684645e0830a47223d_4499	03da1bd30b32560bef8e38ea7761d9fe_2529	c648bd7c3a222aa51bed3e3836bcf8c8_5705	B9T21_05800.p01	B9T15_08330.p01	B9T14_08300.p01	B9T11_07105.p01	B9T12_05710.p01	B9T18_08380.p01	B9T13_06995.p01	F387_00499.p01	A6V30_00875.p01
B9T21_05805		aspartate 1-decarboxylase	26	26	1	1	970				389	389	389	B9T10_08550.p01	BMY_1026.p01	a04b031c37c06570dd644ef46d09ac8c_1647	2cf5bec40a3ef4476bf46f509f729c16_1996	102e21fe2bbcace64a7555dd0bcc9007_2534	4a9cac2c1a817d9acdec143b653b9a80_2905	ac8fed72b32d7540cf9a1b9ac12df95a_2837	197b0243bc5bc4c380ecfb8919a026b1_1690	79ccbe49faa72747a800162f6a36c0ca_3230	614e29224da4f337b8899b3142d81070_2689	d977e7edc1a56720a787e465ab4ce472_3812	e653c257947c2dd0a414de7cb159ba14_3795	31e4ba73e5ddb8c85dea419204f0df5a_2700	752b3971131f3206662b5e22da3b23aa_3342	83683a6c7ca473684645e0830a47223d_4504	03da1bd30b32560bef8e38ea7761d9fe_2534	c648bd7c3a222aa51bed3e3836bcf8c8_5701	B9T21_05805.p01	B9T15_08335.p01	B9T14_08305.p01	B9T11_07100.p01	B9T12_05715.p01	B9T18_08385.p01	B9T13_07000.p01	F387_00498.p01	A6V30_00880.p01
B9T15_08360		linear amide C-N hydrolase	26	26	1	1	975				1079	1193	1083	B9T10_08575.p01	BMY_1021.p01	a04b031c37c06570dd644ef46d09ac8c_1626	2cf5bec40a3ef4476bf46f509f729c16_2016	102e21fe2bbcace64a7555dd0bcc9007_2554	4a9cac2c1a817d9acdec143b653b9a80_2925	ac8fed72b32d7540cf9a1b9ac12df95a_2857	197b0243bc5bc4c380ecfb8919a026b1_1669	79ccbe49faa72747a800162f6a36c0ca_3250	614e29224da4f337b8899b3142d81070_2668	d977e7edc1a56720a787e465ab4ce472_3791	e653c257947c2dd0a414de7cb159ba14_3774	31e4ba73e5ddb8c85dea419204f0df5a_2679	752b3971131f3206662b5e22da3b23aa_3362	83683a6c7ca473684645e0830a47223d_4524	03da1bd30b32560bef8e38ea7761d9fe_2554	c648bd7c3a222aa51bed3e3836bcf8c8_5680	B9T21_05830.p01	B9T15_08360.p01	B9T14_08330.p01	B9T11_07075.p01	B9T12_05740.p01	B9T18_08410.p01	B9T13_07025.p01	F387_00493.p01	A6V30_00905.p01
B9T12_05745		hypothetical protein	26	26	1	1	976				734	770	768	B9T10_08580.p01	BMY_1020.p01	a04b031c37c06570dd644ef46d09ac8c_1622	2cf5bec40a3ef4476bf46f509f729c16_2020	102e21fe2bbcace64a7555dd0bcc9007_2558	4a9cac2c1a817d9acdec143b653b9a80_2929	ac8fed72b32d7540cf9a1b9ac12df95a_2861	197b0243bc5bc4c380ecfb8919a026b1_1665	79ccbe49faa72747a800162f6a36c0ca_3254	614e29224da4f337b8899b3142d81070_2664	d977e7edc1a56720a787e465ab4ce472_3787	e653c257947c2dd0a414de7cb159ba14_3770	31e4ba73e5ddb8c85dea419204f0df5a_2675	752b3971131f3206662b5e22da3b23aa_3366	83683a6c7ca473684645e0830a47223d_4528	03da1bd30b32560bef8e38ea7761d9fe_2558	c648bd7c3a222aa51bed3e3836bcf8c8_5676	B9T21_05835.p01	B9T15_08365.p01	B9T14_08335.p01	B9T11_07070.p01	B9T12_05745.p01	B9T18_08415.p01	B9T13_07030.p01	F387_00492.p01	A6V30_00910.p01
B9T18_08505		cytochrome c-type biogenesis protein CcmH	26	26	1	1	997				428	458	456	B9T10_08665.p01	BMY_1000.p01	a04b031c37c06570dd644ef46d09ac8c_1558	2cf5bec40a3ef4476bf46f509f729c16_2084	102e21fe2bbcace64a7555dd0bcc9007_2626	4a9cac2c1a817d9acdec143b653b9a80_2997	ac8fed72b32d7540cf9a1b9ac12df95a_2925	197b0243bc5bc4c380ecfb8919a026b1_1601	79ccbe49faa72747a800162f6a36c0ca_3322	614e29224da4f337b8899b3142d81070_2600	d977e7edc1a56720a787e465ab4ce472_3723	e653c257947c2dd0a414de7cb159ba14_3706	31e4ba73e5ddb8c85dea419204f0df5a_2611	752b3971131f3206662b5e22da3b23aa_3434	83683a6c7ca473684645e0830a47223d_4592	03da1bd30b32560bef8e38ea7761d9fe_2622	c648bd7c3a222aa51bed3e3836bcf8c8_5612	B9T21_05915.p01	B9T15_08445.p01	B9T14_08415.p01	B9T11_06990.p01	B9T12_05825.p01	B9T18_08505.p01	B9T13_07110.p01	F387_00471.p01	A6V30_00995.p01
J7607_03240		hypothetical protein	26	26	1	1	1008				527	527	527	B9T10_08720.p01	BMY_0990.p01	a04b031c37c06570dd644ef46d09ac8c_1514	2cf5bec40a3ef4476bf46f509f729c16_2128	102e21fe2bbcace64a7555dd0bcc9007_2670	4a9cac2c1a817d9acdec143b653b9a80_3041	ac8fed72b32d7540cf9a1b9ac12df95a_2969	197b0243bc5bc4c380ecfb8919a026b1_1557	79ccbe49faa72747a800162f6a36c0ca_3366	614e29224da4f337b8899b3142d81070_2556	d977e7edc1a56720a787e465ab4ce472_3679	e653c257947c2dd0a414de7cb159ba14_3662	31e4ba73e5ddb8c85dea419204f0df5a_2567	752b3971131f3206662b5e22da3b23aa_3478	83683a6c7ca473684645e0830a47223d_4636	03da1bd30b32560bef8e38ea7761d9fe_2666	c648bd7c3a222aa51bed3e3836bcf8c8_5568	B9T21_05970.p01	B9T15_08500.p01	B9T14_08470.p01	B9T11_06935.p01	B9T12_05880.p01	B9T18_08560.p01	B9T13_07165.p01	F387_00460.p01	A6V30_01045.p01
B9T13_07700		M48 family metallopeptidase	26	26	1	1	1133				563	581	565	B9T10_09270.p01	BMY_0877.p01	a04b031c37c06570dd644ef46d09ac8c_6761	2cf5bec40a3ef4476bf46f509f729c16_7030	102e21fe2bbcace64a7555dd0bcc9007_6321	4a9cac2c1a817d9acdec143b653b9a80_3481	ac8fed72b32d7540cf9a1b9ac12df95a_6626	197b0243bc5bc4c380ecfb8919a026b1_6552	79ccbe49faa72747a800162f6a36c0ca_6751	614e29224da4f337b8899b3142d81070_7110	d977e7edc1a56720a787e465ab4ce472_7228	e653c257947c2dd0a414de7cb159ba14_7220	31e4ba73e5ddb8c85dea419204f0df5a_6590	752b3971131f3206662b5e22da3b23aa_6599	83683a6c7ca473684645e0830a47223d_7520	03da1bd30b32560bef8e38ea7761d9fe_6952	c648bd7c3a222aa51bed3e3836bcf8c8_5148	B9T21_06540.p01	B9T15_09035.p01	B9T14_09005.p01	B9T11_06400.p01	B9T12_06430.p01	B9T18_09095.p01	B9T13_07700.p01	F387_00354.p01	A6V30_01575.p01
yhbY		RNA-binding protein	26	26	1	1	1009				293	302	301	B9T10_08725.p01	BMY_0989.p01	a04b031c37c06570dd644ef46d09ac8c_1510	2cf5bec40a3ef4476bf46f509f729c16_2132	102e21fe2bbcace64a7555dd0bcc9007_2674	4a9cac2c1a817d9acdec143b653b9a80_3045	ac8fed72b32d7540cf9a1b9ac12df95a_2973	197b0243bc5bc4c380ecfb8919a026b1_1553	79ccbe49faa72747a800162f6a36c0ca_3370	614e29224da4f337b8899b3142d81070_2552	d977e7edc1a56720a787e465ab4ce472_3675	e653c257947c2dd0a414de7cb159ba14_3658	31e4ba73e5ddb8c85dea419204f0df5a_2563	752b3971131f3206662b5e22da3b23aa_3482	83683a6c7ca473684645e0830a47223d_4640	03da1bd30b32560bef8e38ea7761d9fe_2670	c648bd7c3a222aa51bed3e3836bcf8c8_5564	B9T21_05975.p01	B9T15_08505.p01	B9T14_08475.p01	B9T11_06930.p01	B9T12_05885.p01	B9T18_08565.p01	B9T13_07170.p01	F387_00459.p01	A6V30_01050.p01
B9T10_08755		LysE family translocator	26	26	1	1	1015				587	617	615	B9T10_08755.p01	BMY_0983.p01	a04b031c37c06570dd644ef46d09ac8c_1486	2cf5bec40a3ef4476bf46f509f729c16_2156	102e21fe2bbcace64a7555dd0bcc9007_2698	4a9cac2c1a817d9acdec143b653b9a80_3069	ac8fed72b32d7540cf9a1b9ac12df95a_2997	197b0243bc5bc4c380ecfb8919a026b1_1529	79ccbe49faa72747a800162f6a36c0ca_3394	614e29224da4f337b8899b3142d81070_2528	d977e7edc1a56720a787e465ab4ce472_3651	e653c257947c2dd0a414de7cb159ba14_3634	31e4ba73e5ddb8c85dea419204f0df5a_2539	752b3971131f3206662b5e22da3b23aa_3506	83683a6c7ca473684645e0830a47223d_4664	03da1bd30b32560bef8e38ea7761d9fe_2694	c648bd7c3a222aa51bed3e3836bcf8c8_5544	B9T21_06005.p01	B9T15_08535.p01	B9T14_08505.p01	B9T11_06900.p01	B9T12_05915.p01	B9T18_08595.p01	B9T13_07200.p01	F387_00453.p01	A6V30_01080.p01
F387_00445		MtnX-like HAD-IB family phosphatase	26	26	1	1	1026				653	653	653	B9T10_08810.p01	BMY_0972.p01	a04b031c37c06570dd644ef46d09ac8c_1454	2cf5bec40a3ef4476bf46f509f729c16_2188	102e21fe2bbcace64a7555dd0bcc9007_2742	4a9cac2c1a817d9acdec143b653b9a80_3113	ac8fed72b32d7540cf9a1b9ac12df95a_3029	197b0243bc5bc4c380ecfb8919a026b1_1489	79ccbe49faa72747a800162f6a36c0ca_3434	614e29224da4f337b8899b3142d81070_2484	d977e7edc1a56720a787e465ab4ce472_3607	e653c257947c2dd0a414de7cb159ba14_3590	31e4ba73e5ddb8c85dea419204f0df5a_2499	752b3971131f3206662b5e22da3b23aa_3538	83683a6c7ca473684645e0830a47223d_4708	03da1bd30b32560bef8e38ea7761d9fe_2726	c648bd7c3a222aa51bed3e3836bcf8c8_5512	B9T21_06055.p01	B9T15_08575.p01	B9T14_08545.p01	B9T11_06860.p01	B9T12_05970.p01	B9T18_08635.p01	B9T13_07240.p01	F387_00445.p01	A6V30_01120.p01
B9T15_08615		hypothetical protein	26	26	1	1	1035				596	596	596	B9T10_08850.p01	BMY_0963.p01	a04b031c37c06570dd644ef46d09ac8c_1422	2cf5bec40a3ef4476bf46f509f729c16_2220	102e21fe2bbcace64a7555dd0bcc9007_2774	4a9cac2c1a817d9acdec143b653b9a80_3145	ac8fed72b32d7540cf9a1b9ac12df95a_3061	197b0243bc5bc4c380ecfb8919a026b1_1457	79ccbe49faa72747a800162f6a36c0ca_3466	614e29224da4f337b8899b3142d81070_2452	d977e7edc1a56720a787e465ab4ce472_3575	e653c257947c2dd0a414de7cb159ba14_3558	31e4ba73e5ddb8c85dea419204f0df5a_2467	752b3971131f3206662b5e22da3b23aa_3570	83683a6c7ca473684645e0830a47223d_4740	03da1bd30b32560bef8e38ea7761d9fe_2758	c648bd7c3a222aa51bed3e3836bcf8c8_5480	B9T21_06095.p01	B9T15_08615.p01	B9T14_08585.p01	B9T11_06820.p01	B9T12_06010.p01	B9T18_08675.p01	B9T13_07280.p01	F387_00437.p01	A6V30_01160.p01
infC		translation initiation factor IF-3	26	26	1	1	1038				461	539	530	B9T10_08865.p01	BMY_0960.p01	a04b031c37c06570dd644ef46d09ac8c_1410	2cf5bec40a3ef4476bf46f509f729c16_2232	102e21fe2bbcace64a7555dd0bcc9007_2786	4a9cac2c1a817d9acdec143b653b9a80_3157	ac8fed72b32d7540cf9a1b9ac12df95a_3073	197b0243bc5bc4c380ecfb8919a026b1_1445	79ccbe49faa72747a800162f6a36c0ca_3478	614e29224da4f337b8899b3142d81070_2440	d977e7edc1a56720a787e465ab4ce472_3563	e653c257947c2dd0a414de7cb159ba14_3546	31e4ba73e5ddb8c85dea419204f0df5a_2455	752b3971131f3206662b5e22da3b23aa_3582	83683a6c7ca473684645e0830a47223d_4752	03da1bd30b32560bef8e38ea7761d9fe_2770	c648bd7c3a222aa51bed3e3836bcf8c8_5468	B9T21_06110.p01	B9T15_08630.p01	B9T14_08600.p01	B9T11_06805.p01	B9T12_06025.p01	B9T18_08690.p01	B9T13_07295.p01	F387_00434.p01	A6V30_01175.p01
J7600_03015		inositol-phosphate phosphatase	26	26	1	1	1050				770	812	771	B9T10_08925.p01	BMY_0948.p01	a04b031c37c06570dd644ef46d09ac8c_1362	2cf5bec40a3ef4476bf46f509f729c16_2280	102e21fe2bbcace64a7555dd0bcc9007_2834	4a9cac2c1a817d9acdec143b653b9a80_3205	ac8fed72b32d7540cf9a1b9ac12df95a_3119	197b0243bc5bc4c380ecfb8919a026b1_1397	79ccbe49faa72747a800162f6a36c0ca_3526	614e29224da4f337b8899b3142d81070_2392	d977e7edc1a56720a787e465ab4ce472_3515	e653c257947c2dd0a414de7cb159ba14_3498	31e4ba73e5ddb8c85dea419204f0df5a_2407	752b3971131f3206662b5e22da3b23aa_3630	83683a6c7ca473684645e0830a47223d_4800	03da1bd30b32560bef8e38ea7761d9fe_2818	c648bd7c3a222aa51bed3e3836bcf8c8_5420	B9T21_06170.p01	B9T15_08690.p01	B9T14_08660.p01	B9T11_06745.p01	B9T12_06085.p01	B9T18_08750.p01	B9T13_07355.p01	F387_00423.p01	A6V30_01230.p01
B9T15_08695		murein L,D-transpeptidase	26	26	1	1	1051				653	680	678	B9T10_08930.p01	BMY_0947.p01	a04b031c37c06570dd644ef46d09ac8c_1358	2cf5bec40a3ef4476bf46f509f729c16_2284	102e21fe2bbcace64a7555dd0bcc9007_2838	4a9cac2c1a817d9acdec143b653b9a80_3209	ac8fed72b32d7540cf9a1b9ac12df95a_3123	197b0243bc5bc4c380ecfb8919a026b1_1393	79ccbe49faa72747a800162f6a36c0ca_3530	614e29224da4f337b8899b3142d81070_2388	d977e7edc1a56720a787e465ab4ce472_3511	e653c257947c2dd0a414de7cb159ba14_3494	31e4ba73e5ddb8c85dea419204f0df5a_2403	752b3971131f3206662b5e22da3b23aa_3634	83683a6c7ca473684645e0830a47223d_4804	03da1bd30b32560bef8e38ea7761d9fe_2822	c648bd7c3a222aa51bed3e3836bcf8c8_5416	B9T21_06175.p01	B9T15_08695.p01	B9T14_08665.p01	B9T11_06740.p01	B9T12_06090.p01	B9T18_08755.p01	B9T13_07360.p01	F387_00422.p01	A6V30_01235.p01
J7547_08750		tRNA(Met) cytidine acetyltransferase	26	26	1	1	3124				1736	1736	1736	B9T10_09590.p01	BMY_1263.p01	a04b031c37c06570dd644ef46d09ac8c_7266	2cf5bec40a3ef4476bf46f509f729c16_6787	102e21fe2bbcace64a7555dd0bcc9007_6948	4a9cac2c1a817d9acdec143b653b9a80_6975	ac8fed72b32d7540cf9a1b9ac12df95a_7359	197b0243bc5bc4c380ecfb8919a026b1_6298	79ccbe49faa72747a800162f6a36c0ca_6299	614e29224da4f337b8899b3142d81070_7350	d977e7edc1a56720a787e465ab4ce472_7684	e653c257947c2dd0a414de7cb159ba14_7675	31e4ba73e5ddb8c85dea419204f0df5a_6832	752b3971131f3206662b5e22da3b23aa_6879	83683a6c7ca473684645e0830a47223d_7559	03da1bd30b32560bef8e38ea7761d9fe_6499	c648bd7c3a222aa51bed3e3836bcf8c8_6715	B9T21_08460.p01	B9T15_09590.p01	B9T14_09560.p01	B9T11_09100.p01	B9T12_08695.p01	B9T18_09685.p01	B9T13_09535.p01	F387_01265.p01	A6V30_06430.p01
J7624_03560		DsrE family protein	26	26	1	1	1053				365	365	365	B9T10_08945.p01	BMY_0944.p01	a04b031c37c06570dd644ef46d09ac8c_1347	2cf5bec40a3ef4476bf46f509f729c16_2295	102e21fe2bbcace64a7555dd0bcc9007_2849	4a9cac2c1a817d9acdec143b653b9a80_3220	ac8fed72b32d7540cf9a1b9ac12df95a_3134	197b0243bc5bc4c380ecfb8919a026b1_1382	79ccbe49faa72747a800162f6a36c0ca_3541	614e29224da4f337b8899b3142d81070_2377	d977e7edc1a56720a787e465ab4ce472_3500	e653c257947c2dd0a414de7cb159ba14_3483	31e4ba73e5ddb8c85dea419204f0df5a_2392	752b3971131f3206662b5e22da3b23aa_3645	83683a6c7ca473684645e0830a47223d_4815	03da1bd30b32560bef8e38ea7761d9fe_2833	c648bd7c3a222aa51bed3e3836bcf8c8_5405	B9T21_06190.p01	B9T15_08710.p01	B9T14_08680.p01	B9T11_06725.p01	B9T12_06105.p01	B9T18_08770.p01	B9T13_07375.p01	F387_00419.p01	A6V30_01250.p01
B143_RS0106865		YajD family HNH nuclease	26	26	1	1	1056				326	362	341	B9T10_08960.p01	BMY_0941.p01	a04b031c37c06570dd644ef46d09ac8c_1335	2cf5bec40a3ef4476bf46f509f729c16_2307	102e21fe2bbcace64a7555dd0bcc9007_2861	4a9cac2c1a817d9acdec143b653b9a80_3232	ac8fed72b32d7540cf9a1b9ac12df95a_3146	197b0243bc5bc4c380ecfb8919a026b1_1370	79ccbe49faa72747a800162f6a36c0ca_3553	614e29224da4f337b8899b3142d81070_2365	d977e7edc1a56720a787e465ab4ce472_3488	e653c257947c2dd0a414de7cb159ba14_3471	31e4ba73e5ddb8c85dea419204f0df5a_2380	752b3971131f3206662b5e22da3b23aa_3657	83683a6c7ca473684645e0830a47223d_4827	03da1bd30b32560bef8e38ea7761d9fe_2845	c648bd7c3a222aa51bed3e3836bcf8c8_5393	B9T21_06205.p01	B9T15_08725.p01	B9T14_08695.p01	B9T11_06710.p01	B9T12_06120.p01	B9T18_08785.p01	B9T13_07390.p01	F387_00416.p01	A6V30_01265.p01
dnaB		replicative DNA helicase	26	26	1	1	1066				1379	1433	1381	B9T10_09020.p01	BMY_0928.p01	a04b031c37c06570dd644ef46d09ac8c_6963	2cf5bec40a3ef4476bf46f509f729c16_6826	102e21fe2bbcace64a7555dd0bcc9007_6119	4a9cac2c1a817d9acdec143b653b9a80_3278	ac8fed72b32d7540cf9a1b9ac12df95a_6420	197b0243bc5bc4c380ecfb8919a026b1_6753	79ccbe49faa72747a800162f6a36c0ca_6550	614e29224da4f337b8899b3142d81070_7310	d977e7edc1a56720a787e465ab4ce472_7430	e653c257947c2dd0a414de7cb159ba14_7423	31e4ba73e5ddb8c85dea419204f0df5a_6792	752b3971131f3206662b5e22da3b23aa_6388	83683a6c7ca473684645e0830a47223d_7319	03da1bd30b32560bef8e38ea7761d9fe_6751	c648bd7c3a222aa51bed3e3836bcf8c8_5347	B9T21_06265.p01	B9T15_08785.p01	B9T14_08755.p01	B9T11_06650.p01	B9T12_06180.p01	B9T18_08845.p01	B9T13_07450.p01	F387_00404.p01	A6V30_01325.p01
J7558_08750		NUDIX domain-containing protein	26	26	1	1	1069				602	602	602	B9T10_09035.p01	BMY_0925.p01	a04b031c37c06570dd644ef46d09ac8c_6951	2cf5bec40a3ef4476bf46f509f729c16_6838	102e21fe2bbcace64a7555dd0bcc9007_6131	4a9cac2c1a817d9acdec143b653b9a80_3290	ac8fed72b32d7540cf9a1b9ac12df95a_6432	197b0243bc5bc4c380ecfb8919a026b1_6741	79ccbe49faa72747a800162f6a36c0ca_6562	614e29224da4f337b8899b3142d81070_7298	d977e7edc1a56720a787e465ab4ce472_7418	e653c257947c2dd0a414de7cb159ba14_7411	31e4ba73e5ddb8c85dea419204f0df5a_6780	752b3971131f3206662b5e22da3b23aa_6400	83683a6c7ca473684645e0830a47223d_7331	03da1bd30b32560bef8e38ea7761d9fe_6763	c648bd7c3a222aa51bed3e3836bcf8c8_5335	B9T21_06280.p01	B9T15_08800.p01	B9T14_08770.p01	B9T11_06635.p01	B9T12_06195.p01	B9T18_08860.p01	B9T13_07465.p01	F387_00401.p01	A6V30_01340.p01
ybeY		rRNA maturation RNase YbeY	26	26	1	1	1077				467	467	467	B9T10_09075.p01	BMY_0917.p01	a04b031c37c06570dd644ef46d09ac8c_6919	2cf5bec40a3ef4476bf46f509f729c16_6870	102e21fe2bbcace64a7555dd0bcc9007_6163	4a9cac2c1a817d9acdec143b653b9a80_3322	ac8fed72b32d7540cf9a1b9ac12df95a_6463	197b0243bc5bc4c380ecfb8919a026b1_6710	79ccbe49faa72747a800162f6a36c0ca_6594	614e29224da4f337b8899b3142d81070_7267	d977e7edc1a56720a787e465ab4ce472_7386	e653c257947c2dd0a414de7cb159ba14_7379	31e4ba73e5ddb8c85dea419204f0df5a_6748	752b3971131f3206662b5e22da3b23aa_6432	83683a6c7ca473684645e0830a47223d_7361	03da1bd30b32560bef8e38ea7761d9fe_6795	c648bd7c3a222aa51bed3e3836bcf8c8_5303	B9T21_06320.p01	B9T15_08840.p01	B9T14_08810.p01	B9T11_06595.p01	B9T12_06235.p01	B9T18_08900.p01	B9T13_07505.p01	F387_00393.p01	A6V30_01380.p01
pilB		type IV-A pilus assembly ATPase PilB	26	26	1	1	1079				1691	1754	1693	B9T10_09085.p01	BMY_0915.p01	a04b031c37c06570dd644ef46d09ac8c_6911	2cf5bec40a3ef4476bf46f509f729c16_6878	102e21fe2bbcace64a7555dd0bcc9007_6171	4a9cac2c1a817d9acdec143b653b9a80_3330	ac8fed72b32d7540cf9a1b9ac12df95a_6471	197b0243bc5bc4c380ecfb8919a026b1_6702	79ccbe49faa72747a800162f6a36c0ca_6602	614e29224da4f337b8899b3142d81070_7259	d977e7edc1a56720a787e465ab4ce472_7378	e653c257947c2dd0a414de7cb159ba14_7371	31e4ba73e5ddb8c85dea419204f0df5a_6740	752b3971131f3206662b5e22da3b23aa_6440	83683a6c7ca473684645e0830a47223d_7369	03da1bd30b32560bef8e38ea7761d9fe_6803	c648bd7c3a222aa51bed3e3836bcf8c8_5295	B9T21_06330.p01	B9T15_08850.p01	B9T14_08820.p01	B9T11_06585.p01	B9T12_06245.p01	B9T18_08910.p01	B9T13_07515.p01	F387_00391.p01	A6V30_01390.p01
B9T15_08910		rod shape-determining protein	26	26	1	1	1092				926	1046	1036	B9T10_09145.p01	BMY_0902.p01	a04b031c37c06570dd644ef46d09ac8c_6863	2cf5bec40a3ef4476bf46f509f729c16_6926	102e21fe2bbcace64a7555dd0bcc9007_6219	4a9cac2c1a817d9acdec143b653b9a80_3378	ac8fed72b32d7540cf9a1b9ac12df95a_6519	197b0243bc5bc4c380ecfb8919a026b1_6654	79ccbe49faa72747a800162f6a36c0ca_6649	614e29224da4f337b8899b3142d81070_7211	d977e7edc1a56720a787e465ab4ce472_7330	e653c257947c2dd0a414de7cb159ba14_7323	31e4ba73e5ddb8c85dea419204f0df5a_6692	752b3971131f3206662b5e22da3b23aa_6488	83683a6c7ca473684645e0830a47223d_7417	03da1bd30b32560bef8e38ea7761d9fe_6850	c648bd7c3a222aa51bed3e3836bcf8c8_5247	B9T21_06390.p01	B9T15_08910.p01	B9T14_08880.p01	B9T11_06525.p01	B9T12_06305.p01	B9T18_08970.p01	B9T13_07575.p01	F387_00379.p01	A6V30_01450.p01
secG		preprotein translocase subunit SecG	26	26	1	1	1094				287	347	344	B9T10_09155.p01	BMY_0900.p01	a04b031c37c06570dd644ef46d09ac8c_6855	2cf5bec40a3ef4476bf46f509f729c16_6934	102e21fe2bbcace64a7555dd0bcc9007_6227	4a9cac2c1a817d9acdec143b653b9a80_3386	ac8fed72b32d7540cf9a1b9ac12df95a_6527	197b0243bc5bc4c380ecfb8919a026b1_6646	79ccbe49faa72747a800162f6a36c0ca_6657	614e29224da4f337b8899b3142d81070_7203	d977e7edc1a56720a787e465ab4ce472_7322	e653c257947c2dd0a414de7cb159ba14_7315	31e4ba73e5ddb8c85dea419204f0df5a_6684	752b3971131f3206662b5e22da3b23aa_6496	83683a6c7ca473684645e0830a47223d_7425	03da1bd30b32560bef8e38ea7761d9fe_6858	c648bd7c3a222aa51bed3e3836bcf8c8_5239	B9T21_06400.p01	B9T15_08920.p01	B9T14_08890.p01	B9T11_06515.p01	B9T12_06315.p01	B9T18_08980.p01	B9T13_07585.p01	F387_00377.p01	A6V30_01460.p01
J7607_08400		A24 family peptidase	26	26	1	1	1096				929	929	929	B9T10_09170.p01	BMY_0897.p01	a04b031c37c06570dd644ef46d09ac8c_6844	2cf5bec40a3ef4476bf46f509f729c16_6945	102e21fe2bbcace64a7555dd0bcc9007_6238	4a9cac2c1a817d9acdec143b653b9a80_3397	ac8fed72b32d7540cf9a1b9ac12df95a_6538	197b0243bc5bc4c380ecfb8919a026b1_6635	79ccbe49faa72747a800162f6a36c0ca_6667	614e29224da4f337b8899b3142d81070_7193	d977e7edc1a56720a787e465ab4ce472_7311	e653c257947c2dd0a414de7cb159ba14_7304	31e4ba73e5ddb8c85dea419204f0df5a_6673	752b3971131f3206662b5e22da3b23aa_6507	83683a6c7ca473684645e0830a47223d_7436	03da1bd30b32560bef8e38ea7761d9fe_6869	c648bd7c3a222aa51bed3e3836bcf8c8_5228	B9T21_06415.p01	B9T15_08935.p01	B9T14_08905.p01	B9T11_06500.p01	B9T12_06330.p01	B9T18_08995.p01	B9T13_07600.p01	F387_00374.p01	A6V30_01475.p01
acpP		acyl carrier protein	26	26	1	1	1100				203	239	236	B9T10_09190.p01	BMY_0893.p01	a04b031c37c06570dd644ef46d09ac8c_6829	2cf5bec40a3ef4476bf46f509f729c16_6960	102e21fe2bbcace64a7555dd0bcc9007_6254	4a9cac2c1a817d9acdec143b653b9a80_3413	ac8fed72b32d7540cf9a1b9ac12df95a_6554	197b0243bc5bc4c380ecfb8919a026b1_6619	79ccbe49faa72747a800162f6a36c0ca_6683	614e29224da4f337b8899b3142d81070_7177	d977e7edc1a56720a787e465ab4ce472_7295	e653c257947c2dd0a414de7cb159ba14_7288	31e4ba73e5ddb8c85dea419204f0df5a_6657	752b3971131f3206662b5e22da3b23aa_6523	83683a6c7ca473684645e0830a47223d_7452	03da1bd30b32560bef8e38ea7761d9fe_6885	c648bd7c3a222aa51bed3e3836bcf8c8_5212	B9T21_06435.p01	B9T15_08955.p01	B9T14_08925.p01	B9T11_06480.p01	B9T12_06350.p01	B9T18_09015.p01	B9T13_07620.p01	F387_00370.p01	A6V30_01495.p01
J7602_09120		glutathione S-transferase N-terminal domain-containing protein	26	26	1	1	1131				368	371	370	B9T10_09260.p01	BMY_0879.p01	a04b031c37c06570dd644ef46d09ac8c_6769	2cf5bec40a3ef4476bf46f509f729c16_7022	102e21fe2bbcace64a7555dd0bcc9007_6313	4a9cac2c1a817d9acdec143b653b9a80_3473	ac8fed72b32d7540cf9a1b9ac12df95a_6618	197b0243bc5bc4c380ecfb8919a026b1_6560	79ccbe49faa72747a800162f6a36c0ca_6743	614e29224da4f337b8899b3142d81070_7118	d977e7edc1a56720a787e465ab4ce472_7236	e653c257947c2dd0a414de7cb159ba14_7228	31e4ba73e5ddb8c85dea419204f0df5a_6598	752b3971131f3206662b5e22da3b23aa_6591	83683a6c7ca473684645e0830a47223d_7512	03da1bd30b32560bef8e38ea7761d9fe_6944	c648bd7c3a222aa51bed3e3836bcf8c8_5156	B9T21_06530.p01	B9T15_09025.p01	B9T14_08995.p01	B9T11_06410.p01	B9T12_06420.p01	B9T18_09085.p01	B9T13_07690.p01	F387_00356.p01	A6V30_01565.p01
F387_00351		hypothetical protein	26	26	1	1	1136				158	221	218	B9T10_09285.p01	BMY_0874.p01	a04b031c37c06570dd644ef46d09ac8c_6749	2cf5bec40a3ef4476bf46f509f729c16_7042	102e21fe2bbcace64a7555dd0bcc9007_6333	4a9cac2c1a817d9acdec143b653b9a80_3493	ac8fed72b32d7540cf9a1b9ac12df95a_6641	197b0243bc5bc4c380ecfb8919a026b1_6540	79ccbe49faa72747a800162f6a36c0ca_6763	614e29224da4f337b8899b3142d81070_7098	d977e7edc1a56720a787e465ab4ce472_7216	e653c257947c2dd0a414de7cb159ba14_7208	31e4ba73e5ddb8c85dea419204f0df5a_6578	752b3971131f3206662b5e22da3b23aa_6611	83683a6c7ca473684645e0830a47223d_7532	03da1bd30b32560bef8e38ea7761d9fe_6964	c648bd7c3a222aa51bed3e3836bcf8c8_5132	B9T21_06560.p01	B9T15_09050.p01	B9T14_09020.p01	B9T11_06385.p01	B9T12_06445.p01	B9T18_09110.p01	B9T13_07715.p01	F387_00351.p01	A6V30_01590.p01
hemJ		protoporphyrinogen oxidase HemJ	26	26	1	1	1137				434	467	435	B9T10_09290.p01	BMY_0873.p01	a04b031c37c06570dd644ef46d09ac8c_6745	2cf5bec40a3ef4476bf46f509f729c16_7046	102e21fe2bbcace64a7555dd0bcc9007_6337	4a9cac2c1a817d9acdec143b653b9a80_3497	ac8fed72b32d7540cf9a1b9ac12df95a_6645	197b0243bc5bc4c380ecfb8919a026b1_6536	79ccbe49faa72747a800162f6a36c0ca_6767	614e29224da4f337b8899b3142d81070_7094	d977e7edc1a56720a787e465ab4ce472_7212	e653c257947c2dd0a414de7cb159ba14_7204	31e4ba73e5ddb8c85dea419204f0df5a_6574	752b3971131f3206662b5e22da3b23aa_6615	83683a6c7ca473684645e0830a47223d_7536	03da1bd30b32560bef8e38ea7761d9fe_6968	c648bd7c3a222aa51bed3e3836bcf8c8_5128	B9T21_06565.p01	B9T15_09055.p01	B9T14_09025.p01	B9T11_06380.p01	B9T12_06450.p01	B9T18_09115.p01	B9T13_07720.p01	F387_00350.p01	A6V30_01595.p01
ispG		flavodoxin-dependent (E)-4-hydroxy-3-methylbut-2-enyl-diphosphate synthase	26	26	1	1	1138				1136	1217	1213	B9T10_09295.p01	BMY_0872.p01	a04b031c37c06570dd644ef46d09ac8c_6741	2cf5bec40a3ef4476bf46f509f729c16_7050	102e21fe2bbcace64a7555dd0bcc9007_6341	4a9cac2c1a817d9acdec143b653b9a80_3501	ac8fed72b32d7540cf9a1b9ac12df95a_6649	197b0243bc5bc4c380ecfb8919a026b1_6532	79ccbe49faa72747a800162f6a36c0ca_6771	614e29224da4f337b8899b3142d81070_7090	d977e7edc1a56720a787e465ab4ce472_7208	e653c257947c2dd0a414de7cb159ba14_7200	31e4ba73e5ddb8c85dea419204f0df5a_6570	752b3971131f3206662b5e22da3b23aa_6619	83683a6c7ca473684645e0830a47223d_7539	03da1bd30b32560bef8e38ea7761d9fe_6972	c648bd7c3a222aa51bed3e3836bcf8c8_5124	B9T21_06570.p01	B9T15_09060.p01	B9T14_09030.p01	B9T11_06375.p01	B9T12_06455.p01	B9T18_09120.p01	B9T13_07725.p01	F387_00349.p01	A6V30_01600.p01
trmB		tRNA (guanosine(46)-N7)-methyltransferase TrmB	26	26	1	1	1139				665	692	690	B9T10_09300.p01	BMY_0871.p01	a04b031c37c06570dd644ef46d09ac8c_6737	2cf5bec40a3ef4476bf46f509f729c16_7054	102e21fe2bbcace64a7555dd0bcc9007_6345	4a9cac2c1a817d9acdec143b653b9a80_3505	ac8fed72b32d7540cf9a1b9ac12df95a_6653	197b0243bc5bc4c380ecfb8919a026b1_6528	79ccbe49faa72747a800162f6a36c0ca_6775	614e29224da4f337b8899b3142d81070_7086	d977e7edc1a56720a787e465ab4ce472_7204	e653c257947c2dd0a414de7cb159ba14_7196	31e4ba73e5ddb8c85dea419204f0df5a_6566	752b3971131f3206662b5e22da3b23aa_6623	83683a6c7ca473684645e0830a47223d_7543	03da1bd30b32560bef8e38ea7761d9fe_6976	c648bd7c3a222aa51bed3e3836bcf8c8_5120	B9T21_06575.p01	B9T15_09065.p01	B9T14_09035.p01	B9T11_06370.p01	B9T12_06460.p01	B9T18_09125.p01	B9T13_07730.p01	F387_00348.p01	A6V30_01605.p01
J7561_08505		folate-binding protein YgfZ	26	26	1	1	3069				674	677	676	B9T10_09325.p01	BMY_1207.p01	a04b031c37c06570dd644ef46d09ac8c_7471	2cf5bec40a3ef4476bf46f509f729c16_6577	102e21fe2bbcace64a7555dd0bcc9007_6734	4a9cac2c1a817d9acdec143b653b9a80_6763	ac8fed72b32d7540cf9a1b9ac12df95a_7156	197b0243bc5bc4c380ecfb8919a026b1_6508	79ccbe49faa72747a800162f6a36c0ca_6506	614e29224da4f337b8899b3142d81070_7553	d977e7edc1a56720a787e465ab4ce472_7478	e653c257947c2dd0a414de7cb159ba14_7470	31e4ba73e5ddb8c85dea419204f0df5a_7037	752b3971131f3206662b5e22da3b23aa_7083	83683a6c7ca473684645e0830a47223d_7765	03da1bd30b32560bef8e38ea7761d9fe_6708	c648bd7c3a222aa51bed3e3836bcf8c8_6921	B9T21_08735.p01	B9T15_09855.p01	B9T14_09825.p01	B9T11_08835.p01	B9T12_08960.p01	B9T18_09955.p01	B9T13_09805.p01	F387_01212.p01	A6V30_06705.p01
B9T12_08950		SDR family NAD(P)-dependent oxidoreductase	26	26	1	1	3071				749	749	749	B9T10_09335.p01	BMY_1209.p01	a04b031c37c06570dd644ef46d09ac8c_7463	2cf5bec40a3ef4476bf46f509f729c16_6585	102e21fe2bbcace64a7555dd0bcc9007_6742	4a9cac2c1a817d9acdec143b653b9a80_6771	ac8fed72b32d7540cf9a1b9ac12df95a_7164	197b0243bc5bc4c380ecfb8919a026b1_6500	79ccbe49faa72747a800162f6a36c0ca_6498	614e29224da4f337b8899b3142d81070_7545	d977e7edc1a56720a787e465ab4ce472_7486	e653c257947c2dd0a414de7cb159ba14_7478	31e4ba73e5ddb8c85dea419204f0df5a_7029	752b3971131f3206662b5e22da3b23aa_7075	83683a6c7ca473684645e0830a47223d_7757	03da1bd30b32560bef8e38ea7761d9fe_6700	c648bd7c3a222aa51bed3e3836bcf8c8_6913	B9T21_08725.p01	B9T15_09845.p01	B9T14_09815.p01	B9T11_08845.p01	B9T12_08950.p01	B9T18_09945.p01	B9T13_09795.p01	F387_01214.p01	A6V30_06695.p01
J7600_09495		glyoxylate/hydroxypyruvate reductase A	26	26	1	1	3074				932	932	932	B9T10_09350.p01	BMY_1212.p01	a04b031c37c06570dd644ef46d09ac8c_7451	2cf5bec40a3ef4476bf46f509f729c16_6597	102e21fe2bbcace64a7555dd0bcc9007_6754	4a9cac2c1a817d9acdec143b653b9a80_6783	ac8fed72b32d7540cf9a1b9ac12df95a_7176	197b0243bc5bc4c380ecfb8919a026b1_6488	79ccbe49faa72747a800162f6a36c0ca_6486	614e29224da4f337b8899b3142d81070_7533	d977e7edc1a56720a787e465ab4ce472_7498	e653c257947c2dd0a414de7cb159ba14_7490	31e4ba73e5ddb8c85dea419204f0df5a_7017	752b3971131f3206662b5e22da3b23aa_7064	83683a6c7ca473684645e0830a47223d_7745	03da1bd30b32560bef8e38ea7761d9fe_6688	c648bd7c3a222aa51bed3e3836bcf8c8_6901	B9T21_08710.p01	B9T15_09830.p01	B9T14_09800.p01	B9T11_08860.p01	B9T12_08935.p01	B9T18_09930.p01	B9T13_09780.p01	F387_01217.p01	A6V30_06680.p01
B9T11_08880		hypothetical protein	26	26	1	1	3078				842	842	842	B9T10_09370.p01	BMY_1216.p01	a04b031c37c06570dd644ef46d09ac8c_7435	2cf5bec40a3ef4476bf46f509f729c16_6613	102e21fe2bbcace64a7555dd0bcc9007_6770	4a9cac2c1a817d9acdec143b653b9a80_6799	ac8fed72b32d7540cf9a1b9ac12df95a_7192	197b0243bc5bc4c380ecfb8919a026b1_6472	79ccbe49faa72747a800162f6a36c0ca_6470	614e29224da4f337b8899b3142d81070_7517	d977e7edc1a56720a787e465ab4ce472_7514	e653c257947c2dd0a414de7cb159ba14_7506	31e4ba73e5ddb8c85dea419204f0df5a_7001	752b3971131f3206662b5e22da3b23aa_7048	83683a6c7ca473684645e0830a47223d_7729	03da1bd30b32560bef8e38ea7761d9fe_6672	c648bd7c3a222aa51bed3e3836bcf8c8_6885	B9T21_08690.p01	B9T15_09810.p01	B9T14_09780.p01	B9T11_08880.p01	B9T12_08915.p01	B9T18_09910.p01	B9T13_09760.p01	F387_01221.p01	A6V30_06660.p01
mfd		transcription-repair coupling factor	26	26	1	1	3079				3368	3368	3368	B9T10_09375.p01	BMY_1217.p01	a04b031c37c06570dd644ef46d09ac8c_7431	2cf5bec40a3ef4476bf46f509f729c16_6617	102e21fe2bbcace64a7555dd0bcc9007_6774	4a9cac2c1a817d9acdec143b653b9a80_6803	ac8fed72b32d7540cf9a1b9ac12df95a_7196	197b0243bc5bc4c380ecfb8919a026b1_6468	79ccbe49faa72747a800162f6a36c0ca_6466	614e29224da4f337b8899b3142d81070_7513	d977e7edc1a56720a787e465ab4ce472_7518	e653c257947c2dd0a414de7cb159ba14_7509	31e4ba73e5ddb8c85dea419204f0df5a_6997	752b3971131f3206662b5e22da3b23aa_7044	83683a6c7ca473684645e0830a47223d_7725	03da1bd30b32560bef8e38ea7761d9fe_6668	c648bd7c3a222aa51bed3e3836bcf8c8_6881	B9T21_08685.p01	B9T15_09805.p01	B9T14_09775.p01	B9T11_08885.p01	B9T12_08910.p01	B9T18_09905.p01	B9T13_09755.p01	F387_01222.p01	A6V30_06655.p01
sufB		Fe-S cluster assembly protein SufB	26	26	1	1	3084				1376	1448	1445	B9T10_09400.p01	BMY_1223.p01	a04b031c37c06570dd644ef46d09ac8c_7415	2cf5bec40a3ef4476bf46f509f729c16_6637	102e21fe2bbcace64a7555dd0bcc9007_6794	4a9cac2c1a817d9acdec143b653b9a80_6823	ac8fed72b32d7540cf9a1b9ac12df95a_7212	197b0243bc5bc4c380ecfb8919a026b1_6448	79ccbe49faa72747a800162f6a36c0ca_6448	614e29224da4f337b8899b3142d81070_7497	d977e7edc1a56720a787e465ab4ce472_7534	e653c257947c2dd0a414de7cb159ba14_7525	31e4ba73e5ddb8c85dea419204f0df5a_6981	752b3971131f3206662b5e22da3b23aa_7028	83683a6c7ca473684645e0830a47223d_7709	03da1bd30b32560bef8e38ea7761d9fe_6648	c648bd7c3a222aa51bed3e3836bcf8c8_6861	B9T21_08650.p01	B9T15_09785.p01	B9T14_09755.p01	B9T11_08910.p01	B9T12_08885.p01	B9T18_09880.p01	B9T13_09725.p01	F387_01227.p01	A6V30_06625.p01
J7558_09310		DUF421 domain-containing protein	26	26	1	1	3093				500	689	681	B9T10_09435.p01	BMY_1230.p01	a04b031c37c06570dd644ef46d09ac8c_7387	2cf5bec40a3ef4476bf46f509f729c16_6665	102e21fe2bbcace64a7555dd0bcc9007_6826	4a9cac2c1a817d9acdec143b653b9a80_6855	ac8fed72b32d7540cf9a1b9ac12df95a_7240	197b0243bc5bc4c380ecfb8919a026b1_6420	79ccbe49faa72747a800162f6a36c0ca_6420	614e29224da4f337b8899b3142d81070_7470	d977e7edc1a56720a787e465ab4ce472_7562	e653c257947c2dd0a414de7cb159ba14_7553	31e4ba73e5ddb8c85dea419204f0df5a_6953	752b3971131f3206662b5e22da3b23aa_7000	83683a6c7ca473684645e0830a47223d_7681	03da1bd30b32560bef8e38ea7761d9fe_6620	c648bd7c3a222aa51bed3e3836bcf8c8_6833	B9T21_08615.p01	B9T15_09745.p01	B9T14_09715.p01	B9T11_08945.p01	B9T12_08850.p01	B9T18_09840.p01	B9T13_09690.p01	F387_01235.p01	A6V30_06585.p01
J7606_09525		rhodanese-like domain-containing protein	26	26	1	1	3095				422	431	430	B9T10_09445.p01	BMY_1232.p01	a04b031c37c06570dd644ef46d09ac8c_7379	2cf5bec40a3ef4476bf46f509f729c16_6673	102e21fe2bbcace64a7555dd0bcc9007_6834	4a9cac2c1a817d9acdec143b653b9a80_6863	ac8fed72b32d7540cf9a1b9ac12df95a_7248	197b0243bc5bc4c380ecfb8919a026b1_6412	79ccbe49faa72747a800162f6a36c0ca_6412	614e29224da4f337b8899b3142d81070_7462	d977e7edc1a56720a787e465ab4ce472_7570	e653c257947c2dd0a414de7cb159ba14_7561	31e4ba73e5ddb8c85dea419204f0df5a_6945	752b3971131f3206662b5e22da3b23aa_6992	83683a6c7ca473684645e0830a47223d_7673	03da1bd30b32560bef8e38ea7761d9fe_6612	c648bd7c3a222aa51bed3e3836bcf8c8_6825	B9T21_08605.p01	B9T15_09735.p01	B9T14_09705.p01	B9T11_08955.p01	B9T12_08840.p01	B9T18_09830.p01	B9T13_09680.p01	F387_01237.p01	A6V30_06575.p01
grxC		glutaredoxin 3	26	26	1	1	3096				239	251	250	B9T10_09450.p01	BMY_1233.p01	a04b031c37c06570dd644ef46d09ac8c_7375	2cf5bec40a3ef4476bf46f509f729c16_6677	102e21fe2bbcace64a7555dd0bcc9007_6838	4a9cac2c1a817d9acdec143b653b9a80_6867	ac8fed72b32d7540cf9a1b9ac12df95a_7252	197b0243bc5bc4c380ecfb8919a026b1_6408	79ccbe49faa72747a800162f6a36c0ca_6408	614e29224da4f337b8899b3142d81070_7458	d977e7edc1a56720a787e465ab4ce472_7574	e653c257947c2dd0a414de7cb159ba14_7565	31e4ba73e5ddb8c85dea419204f0df5a_6941	752b3971131f3206662b5e22da3b23aa_6988	83683a6c7ca473684645e0830a47223d_7669	03da1bd30b32560bef8e38ea7761d9fe_6608	c648bd7c3a222aa51bed3e3836bcf8c8_6821	B9T21_08600.p01	B9T15_09730.p01	B9T14_09700.p01	B9T11_08960.p01	B9T12_08835.p01	B9T18_09825.p01	B9T13_09675.p01	F387_01238.p01	A6V30_06570.p01
holA		DNA polymerase III subunit delta	26	26	1	1	3098				941	1031	1027	B9T10_09460.p01	BMY_1235.p01	a04b031c37c06570dd644ef46d09ac8c_7367	2cf5bec40a3ef4476bf46f509f729c16_6685	102e21fe2bbcace64a7555dd0bcc9007_6846	4a9cac2c1a817d9acdec143b653b9a80_6875	ac8fed72b32d7540cf9a1b9ac12df95a_7260	197b0243bc5bc4c380ecfb8919a026b1_6400	79ccbe49faa72747a800162f6a36c0ca_6400	614e29224da4f337b8899b3142d81070_7451	d977e7edc1a56720a787e465ab4ce472_7582	e653c257947c2dd0a414de7cb159ba14_7573	31e4ba73e5ddb8c85dea419204f0df5a_6933	752b3971131f3206662b5e22da3b23aa_6980	83683a6c7ca473684645e0830a47223d_7661	03da1bd30b32560bef8e38ea7761d9fe_6600	c648bd7c3a222aa51bed3e3836bcf8c8_6813	B9T21_08590.p01	B9T15_09720.p01	B9T14_09690.p01	B9T11_08970.p01	B9T12_08825.p01	B9T18_09815.p01	B9T13_09665.p01	F387_01240.p01	A6V30_06560.p01
J7553_09200		citrate synthase	26	26	1	1	3108				1166	1277	1272	B9T10_09500.p01	BMY_1245.p01	a04b031c37c06570dd644ef46d09ac8c_7335	2cf5bec40a3ef4476bf46f509f729c16_6717	102e21fe2bbcace64a7555dd0bcc9007_6878	4a9cac2c1a817d9acdec143b653b9a80_6907	ac8fed72b32d7540cf9a1b9ac12df95a_7290	197b0243bc5bc4c380ecfb8919a026b1_6368	79ccbe49faa72747a800162f6a36c0ca_6368	614e29224da4f337b8899b3142d81070_7419	d977e7edc1a56720a787e465ab4ce472_7614	e653c257947c2dd0a414de7cb159ba14_7605	31e4ba73e5ddb8c85dea419204f0df5a_6901	752b3971131f3206662b5e22da3b23aa_6948	83683a6c7ca473684645e0830a47223d_7629	03da1bd30b32560bef8e38ea7761d9fe_6568	c648bd7c3a222aa51bed3e3836bcf8c8_6781	B9T21_08550.p01	B9T15_09680.p01	B9T14_09650.p01	B9T11_09010.p01	B9T12_08785.p01	B9T18_09775.p01	B9T13_09625.p01	F387_01247.p01	A6V30_06520.p01
pyrB		aspartate carbamoyltransferase	26	26	1	1	3109				953	1019	1016	B9T10_09505.p01	BMY_1246.p01	a04b031c37c06570dd644ef46d09ac8c_7331	2cf5bec40a3ef4476bf46f509f729c16_6721	102e21fe2bbcace64a7555dd0bcc9007_6882	4a9cac2c1a817d9acdec143b653b9a80_6911	ac8fed72b32d7540cf9a1b9ac12df95a_7294	197b0243bc5bc4c380ecfb8919a026b1_6364	79ccbe49faa72747a800162f6a36c0ca_6364	614e29224da4f337b8899b3142d81070_7415	d977e7edc1a56720a787e465ab4ce472_7618	e653c257947c2dd0a414de7cb159ba14_7609	31e4ba73e5ddb8c85dea419204f0df5a_6897	752b3971131f3206662b5e22da3b23aa_6944	83683a6c7ca473684645e0830a47223d_7625	03da1bd30b32560bef8e38ea7761d9fe_6564	c648bd7c3a222aa51bed3e3836bcf8c8_6777	B9T21_08545.p01	B9T15_09675.p01	B9T14_09645.p01	B9T11_09015.p01	B9T12_08780.p01	B9T18_09770.p01	B9T13_09620.p01	F387_01248.p01	A6V30_06515.p01
rimP		ribosome maturation factor RimP	26	26	1	1	3117				458	512	509	B9T10_09545.p01	BMY_1254.p01	a04b031c37c06570dd644ef46d09ac8c_7299	2cf5bec40a3ef4476bf46f509f729c16_6753	102e21fe2bbcace64a7555dd0bcc9007_6914	4a9cac2c1a817d9acdec143b653b9a80_6941	ac8fed72b32d7540cf9a1b9ac12df95a_7326	197b0243bc5bc4c380ecfb8919a026b1_6332	79ccbe49faa72747a800162f6a36c0ca_6333	614e29224da4f337b8899b3142d81070_7383	d977e7edc1a56720a787e465ab4ce472_7650	e653c257947c2dd0a414de7cb159ba14_7641	31e4ba73e5ddb8c85dea419204f0df5a_6865	752b3971131f3206662b5e22da3b23aa_6913	83683a6c7ca473684645e0830a47223d_7593	03da1bd30b32560bef8e38ea7761d9fe_6533	c648bd7c3a222aa51bed3e3836bcf8c8_6749	B9T21_08505.p01	B9T15_09635.p01	B9T14_09605.p01	B9T11_09055.p01	B9T12_08740.p01	B9T18_09730.p01	B9T13_09580.p01	F387_01256.p01	A6V30_06475.p01
B143_RS0108565		endonuclease/exonuclease/phosphatase family protein	26	26	1	1	3123				821	869	822	B9T10_09580.p01	BMY_1261.p01	a04b031c37c06570dd644ef46d09ac8c_7273	2cf5bec40a3ef4476bf46f509f729c16_6780	102e21fe2bbcace64a7555dd0bcc9007_6941	4a9cac2c1a817d9acdec143b653b9a80_6968	ac8fed72b32d7540cf9a1b9ac12df95a_7352	197b0243bc5bc4c380ecfb8919a026b1_6305	79ccbe49faa72747a800162f6a36c0ca_6306	614e29224da4f337b8899b3142d81070_7357	d977e7edc1a56720a787e465ab4ce472_7677	e653c257947c2dd0a414de7cb159ba14_7668	31e4ba73e5ddb8c85dea419204f0df5a_6839	752b3971131f3206662b5e22da3b23aa_6886	83683a6c7ca473684645e0830a47223d_7566	03da1bd30b32560bef8e38ea7761d9fe_6506	c648bd7c3a222aa51bed3e3836bcf8c8_6722	B9T21_08470.p01	B9T15_09600.p01	B9T14_09570.p01	B9T11_09090.p01	B9T12_08705.p01	B9T18_09695.p01	B9T13_09545.p01	F387_01263.p01	A6V30_06440.p01
folK		2-amino-4-hydroxy-6- hydroxymethyldihydropteridine diphosphokinase	26	26	1	1	3132				488	488	488	B9T10_09640.p01	BMY_1273.p01	a04b031c37c06570dd644ef46d09ac8c_6687	2cf5bec40a3ef4476bf46f509f729c16_6203	102e21fe2bbcace64a7555dd0bcc9007_7434	4a9cac2c1a817d9acdec143b653b9a80_7427	ac8fed72b32d7540cf9a1b9ac12df95a_6025	197b0243bc5bc4c380ecfb8919a026b1_7446	79ccbe49faa72747a800162f6a36c0ca_6261	614e29224da4f337b8899b3142d81070_6724	d977e7edc1a56720a787e465ab4ce472_6474	e653c257947c2dd0a414de7cb159ba14_6461	31e4ba73e5ddb8c85dea419204f0df5a_6516	752b3971131f3206662b5e22da3b23aa_6315	83683a6c7ca473684645e0830a47223d_7245	03da1bd30b32560bef8e38ea7761d9fe_6461	c648bd7c3a222aa51bed3e3836bcf8c8_6677	B9T21_08410.p01	B9T15_09540.p01	B9T14_09510.p01	B9T11_09150.p01	B9T12_08645.p01	B9T18_09640.p01	B9T13_09485.p01	F387_01274.p01	A6V30_06385.p01
A6V30_06350		GNAT family N-acetyltransferase	26	26	1	1	3139				527	527	527	B9T10_09675.p01	BMY_1280.p01	a04b031c37c06570dd644ef46d09ac8c_6659	2cf5bec40a3ef4476bf46f509f729c16_6231	102e21fe2bbcace64a7555dd0bcc9007_7462	4a9cac2c1a817d9acdec143b653b9a80_7455	ac8fed72b32d7540cf9a1b9ac12df95a_6053	197b0243bc5bc4c380ecfb8919a026b1_7418	79ccbe49faa72747a800162f6a36c0ca_6234	614e29224da4f337b8899b3142d81070_6696	d977e7edc1a56720a787e465ab4ce472_6502	e653c257947c2dd0a414de7cb159ba14_6489	31e4ba73e5ddb8c85dea419204f0df5a_6488	752b3971131f3206662b5e22da3b23aa_6287	83683a6c7ca473684645e0830a47223d_7217	03da1bd30b32560bef8e38ea7761d9fe_6433	c648bd7c3a222aa51bed3e3836bcf8c8_6650	B9T21_08375.p01	B9T15_09505.p01	B9T14_09475.p01	B9T11_09185.p01	B9T12_08610.p01	B9T18_09605.p01	B9T13_09450.p01	F387_01281.p01	A6V30_06350.p01
J7554_07785		multidrug efflux SMR transporter	26	26	1	1	3152				359	359	359	B9T10_09725.p01	BMY_1293.p01	a04b031c37c06570dd644ef46d09ac8c_6619	2cf5bec40a3ef4476bf46f509f729c16_6270	102e21fe2bbcace64a7555dd0bcc9007_6413	4a9cac2c1a817d9acdec143b653b9a80_6443	ac8fed72b32d7540cf9a1b9ac12df95a_6093	197b0243bc5bc4c380ecfb8919a026b1_7378	79ccbe49faa72747a800162f6a36c0ca_6194	614e29224da4f337b8899b3142d81070_6656	d977e7edc1a56720a787e465ab4ce472_6542	e653c257947c2dd0a414de7cb159ba14_6529	31e4ba73e5ddb8c85dea419204f0df5a_6448	752b3971131f3206662b5e22da3b23aa_6247	83683a6c7ca473684645e0830a47223d_7178	03da1bd30b32560bef8e38ea7761d9fe_6393	c648bd7c3a222aa51bed3e3836bcf8c8_6612	B9T21_08325.p01	B9T15_09455.p01	B9T14_09425.p01	B9T11_09235.p01	B9T12_08560.p01	B9T18_09555.p01	B9T13_09400.p01	F387_01291.p01	A6V30_06300.p01
fnr		fumarate/nitrate reduction transcriptional regulator Fnr	26	26	1	1	3153				533	707	693	B9T10_09730.p01	BMY_1294.p01	a04b031c37c06570dd644ef46d09ac8c_6615	2cf5bec40a3ef4476bf46f509f729c16_6275	102e21fe2bbcace64a7555dd0bcc9007_6418	4a9cac2c1a817d9acdec143b653b9a80_6448	ac8fed72b32d7540cf9a1b9ac12df95a_6098	197b0243bc5bc4c380ecfb8919a026b1_7374	79ccbe49faa72747a800162f6a36c0ca_6190	614e29224da4f337b8899b3142d81070_6652	d977e7edc1a56720a787e465ab4ce472_6547	e653c257947c2dd0a414de7cb159ba14_6534	31e4ba73e5ddb8c85dea419204f0df5a_6444	752b3971131f3206662b5e22da3b23aa_6243	83683a6c7ca473684645e0830a47223d_7174	03da1bd30b32560bef8e38ea7761d9fe_6389	c648bd7c3a222aa51bed3e3836bcf8c8_6608	B9T21_08320.p01	B9T15_09450.p01	B9T14_09420.p01	B9T11_09240.p01	B9T12_08555.p01	B9T18_09550.p01	B9T13_09395.p01	F387_01292.p01	A6V30_06295.p01
thiM		hydroxyethylthiazole kinase	26	26	1	1	3154				782	782	782	B9T10_09735.p01	BMY_1295.p01	a04b031c37c06570dd644ef46d09ac8c_6611	2cf5bec40a3ef4476bf46f509f729c16_6279	102e21fe2bbcace64a7555dd0bcc9007_6422	4a9cac2c1a817d9acdec143b653b9a80_6452	ac8fed72b32d7540cf9a1b9ac12df95a_6102	197b0243bc5bc4c380ecfb8919a026b1_7370	79ccbe49faa72747a800162f6a36c0ca_6186	614e29224da4f337b8899b3142d81070_6648	d977e7edc1a56720a787e465ab4ce472_6551	e653c257947c2dd0a414de7cb159ba14_6538	31e4ba73e5ddb8c85dea419204f0df5a_6440	752b3971131f3206662b5e22da3b23aa_6239	83683a6c7ca473684645e0830a47223d_7170	03da1bd30b32560bef8e38ea7761d9fe_6385	c648bd7c3a222aa51bed3e3836bcf8c8_6604	B9T21_08315.p01	B9T15_09445.p01	B9T14_09415.p01	B9T11_09245.p01	B9T12_08550.p01	B9T18_09545.p01	B9T13_09390.p01	F387_01293.p01	A6V30_06290.p01
B9T12_08540		thiamine phosphate synthase	26	26	1	1	3156				650	650	650	B9T10_09745.p01	BMY_1297.p01	a04b031c37c06570dd644ef46d09ac8c_6602	2cf5bec40a3ef4476bf46f509f729c16_6287	102e21fe2bbcace64a7555dd0bcc9007_6430	4a9cac2c1a817d9acdec143b653b9a80_6460	ac8fed72b32d7540cf9a1b9ac12df95a_6110	197b0243bc5bc4c380ecfb8919a026b1_7361	79ccbe49faa72747a800162f6a36c0ca_6177	614e29224da4f337b8899b3142d81070_6639	d977e7edc1a56720a787e465ab4ce472_6559	e653c257947c2dd0a414de7cb159ba14_6546	31e4ba73e5ddb8c85dea419204f0df5a_6431	752b3971131f3206662b5e22da3b23aa_6230	83683a6c7ca473684645e0830a47223d_7161	03da1bd30b32560bef8e38ea7761d9fe_6376	c648bd7c3a222aa51bed3e3836bcf8c8_6595	B9T21_08305.p01	B9T15_09435.p01	B9T14_09405.p01	B9T11_09255.p01	B9T12_08540.p01	B9T18_09535.p01	B9T13_09380.p01	F387_01295.p01	A6V30_06280.p01
J7620_07825		UDP-2,3-diacylglucosamine diphosphatase	26	26	1	1	3158				764	782	781	B9T10_09755.p01	BMY_1299.p01	a04b031c37c06570dd644ef46d09ac8c_6594	2cf5bec40a3ef4476bf46f509f729c16_6295	102e21fe2bbcace64a7555dd0bcc9007_6438	4a9cac2c1a817d9acdec143b653b9a80_6468	ac8fed72b32d7540cf9a1b9ac12df95a_6118	197b0243bc5bc4c380ecfb8919a026b1_7353	79ccbe49faa72747a800162f6a36c0ca_6169	614e29224da4f337b8899b3142d81070_6631	d977e7edc1a56720a787e465ab4ce472_6567	e653c257947c2dd0a414de7cb159ba14_6554	31e4ba73e5ddb8c85dea419204f0df5a_6423	752b3971131f3206662b5e22da3b23aa_6222	83683a6c7ca473684645e0830a47223d_7153	03da1bd30b32560bef8e38ea7761d9fe_6368	c648bd7c3a222aa51bed3e3836bcf8c8_6587	B9T21_08295.p01	B9T15_09425.p01	B9T14_09395.p01	B9T11_09265.p01	B9T12_08530.p01	B9T18_09525.p01	B9T13_09370.p01	F387_01297.p01	A6V30_06270.p01
J7552_08735		DUF4124 domain-containing protein	26	26	1	1	3037				428	449	447	B9T10_09915.p01	BMY_1331.p01	a04b031c37c06570dd644ef46d09ac8c_6467	2cf5bec40a3ef4476bf46f509f729c16_6422	102e21fe2bbcace64a7555dd0bcc9007_6590	4a9cac2c1a817d9acdec143b653b9a80_6619	ac8fed72b32d7540cf9a1b9ac12df95a_6246	197b0243bc5bc4c380ecfb8919a026b1_6936	79ccbe49faa72747a800162f6a36c0ca_6041	614e29224da4f337b8899b3142d81070_6464	d977e7edc1a56720a787e465ab4ce472_6733	e653c257947c2dd0a414de7cb159ba14_6722	31e4ba73e5ddb8c85dea419204f0df5a_6295	752b3971131f3206662b5e22da3b23aa_6094	83683a6c7ca473684645e0830a47223d_6988	03da1bd30b32560bef8e38ea7761d9fe_6241	c648bd7c3a222aa51bed3e3836bcf8c8_6460	B9T21_08135.p01	B9T15_09265.p01	B9T14_09235.p01	B9T11_09425.p01	B9T12_09140.p01	B9T18_09315.p01	B9T13_09210.p01	F387_01329.p01	A6V30_06110.p01
ndhC		NADH-quinone oxidoreductase subunit A	26	26	1	1	3035				353	503	404	B9T10_09925.p01	BMY_1333.p01	a04b031c37c06570dd644ef46d09ac8c_6459	2cf5bec40a3ef4476bf46f509f729c16_6430	102e21fe2bbcace64a7555dd0bcc9007_6598	4a9cac2c1a817d9acdec143b653b9a80_6627	ac8fed72b32d7540cf9a1b9ac12df95a_6254	197b0243bc5bc4c380ecfb8919a026b1_6928	79ccbe49faa72747a800162f6a36c0ca_6033	614e29224da4f337b8899b3142d81070_6456	d977e7edc1a56720a787e465ab4ce472_6741	e653c257947c2dd0a414de7cb159ba14_6730	31e4ba73e5ddb8c85dea419204f0df5a_6287	752b3971131f3206662b5e22da3b23aa_6086	83683a6c7ca473684645e0830a47223d_6980	03da1bd30b32560bef8e38ea7761d9fe_6234	c648bd7c3a222aa51bed3e3836bcf8c8_6453	B9T21_08125.p01	B9T15_09255.p01	B9T14_09225.p01	B9T11_09435.p01	B9T12_09150.p01	B9T18_09305.p01	B9T13_09200.p01	F387_01331.p01	A6V30_06100.p01
B9T10_09930		NADH-quinone oxidoreductase subunit B	26	26	1	1	3034				485	506	485	B9T10_09930.p01	BMY_1334.p01	a04b031c37c06570dd644ef46d09ac8c_6455	2cf5bec40a3ef4476bf46f509f729c16_6434	102e21fe2bbcace64a7555dd0bcc9007_6602	4a9cac2c1a817d9acdec143b653b9a80_6631	ac8fed72b32d7540cf9a1b9ac12df95a_6258	197b0243bc5bc4c380ecfb8919a026b1_6924	79ccbe49faa72747a800162f6a36c0ca_6029	614e29224da4f337b8899b3142d81070_6452	d977e7edc1a56720a787e465ab4ce472_6745	e653c257947c2dd0a414de7cb159ba14_6733	31e4ba73e5ddb8c85dea419204f0df5a_6283	752b3971131f3206662b5e22da3b23aa_6082	83683a6c7ca473684645e0830a47223d_6976	03da1bd30b32560bef8e38ea7761d9fe_6230	c648bd7c3a222aa51bed3e3836bcf8c8_6449	B9T21_08120.p01	B9T15_09250.p01	B9T14_09220.p01	B9T11_09440.p01	B9T12_09155.p01	B9T18_09300.p01	B9T13_09195.p01	F387_01332.p01	A6V30_06095.p01
nuoH		NADH-quinone oxidoreductase subunit NuoH	26	26	1	1	3027				1037	1043	1039	B9T10_09960.p01	BMY_1341.p01	a04b031c37c06570dd644ef46d09ac8c_6431	2cf5bec40a3ef4476bf46f509f729c16_6458	102e21fe2bbcace64a7555dd0bcc9007_6626	4a9cac2c1a817d9acdec143b653b9a80_6655	ac8fed72b32d7540cf9a1b9ac12df95a_6281	197b0243bc5bc4c380ecfb8919a026b1_6900	79ccbe49faa72747a800162f6a36c0ca_6005	614e29224da4f337b8899b3142d81070_6428	d977e7edc1a56720a787e465ab4ce472_6769	e653c257947c2dd0a414de7cb159ba14_6757	31e4ba73e5ddb8c85dea419204f0df5a_6259	752b3971131f3206662b5e22da3b23aa_6058	83683a6c7ca473684645e0830a47223d_6953	03da1bd30b32560bef8e38ea7761d9fe_6206	c648bd7c3a222aa51bed3e3836bcf8c8_6425	B9T21_08090.p01	B9T15_09220.p01	B9T14_09190.p01	B9T11_09470.p01	B9T12_09185.p01	B9T18_09270.p01	B9T13_09165.p01	F387_01338.p01	A6V30_06065.p01
B9T10_00215		ABC transporter substrate-binding protein	26	26	1	1	1201				857	857	857	B9T10_00215.p01	BMY_1921.p01	a04b031c37c06570dd644ef46d09ac8c_7514	2cf5bec40a3ef4476bf46f509f729c16_7462	102e21fe2bbcace64a7555dd0bcc9007_7236	4a9cac2c1a817d9acdec143b653b9a80_7014	ac8fed72b32d7540cf9a1b9ac12df95a_7396	197b0243bc5bc4c380ecfb8919a026b1_3986	79ccbe49faa72747a800162f6a36c0ca_7069	614e29224da4f337b8899b3142d81070_7725	d977e7edc1a56720a787e465ab4ce472_7846	e653c257947c2dd0a414de7cb159ba14_7837	31e4ba73e5ddb8c85dea419204f0df5a_7080	752b3971131f3206662b5e22da3b23aa_7253	83683a6c7ca473684645e0830a47223d_7807	03da1bd30b32560bef8e38ea7761d9fe_7280	c648bd7c3a222aa51bed3e3836bcf8c8_7100	B9T21_00220.p01	B9T15_04825.p01	B9T14_00215.p01	B9T11_02530.p01	B9T12_00210.p01	B9T18_04905.p01	B9T13_00215.p01	F387_00878.p01	A6V30_01860.p01
queG		tRNA epoxyqueuosine(34) reductase QueG	26	26	1	1	3009				1046	1070	1069	B9T10_10040.p01	BMY_1359.p01	a04b031c37c06570dd644ef46d09ac8c_6369	2cf5bec40a3ef4476bf46f509f729c16_6533	102e21fe2bbcace64a7555dd0bcc9007_6690	4a9cac2c1a817d9acdec143b653b9a80_6719	ac8fed72b32d7540cf9a1b9ac12df95a_6344	197b0243bc5bc4c380ecfb8919a026b1_6828	79ccbe49faa72747a800162f6a36c0ca_5941	614e29224da4f337b8899b3142d81070_6356	d977e7edc1a56720a787e465ab4ce472_6841	e653c257947c2dd0a414de7cb159ba14_6829	31e4ba73e5ddb8c85dea419204f0df5a_6195	752b3971131f3206662b5e22da3b23aa_5987	83683a6c7ca473684645e0830a47223d_6881	03da1bd30b32560bef8e38ea7761d9fe_6142	c648bd7c3a222aa51bed3e3836bcf8c8_6361	B9T21_08010.p01	B9T15_09130.p01	B9T14_09100.p01	B9T11_09560.p01	B9T12_09265.p01	B9T18_09190.p01	B9T13_09075.p01	F387_01356.p01	A6V30_05985.p01
B9T13_00225		iron ABC transporter permease	26	26	1	1	1203				935	974	972	B9T10_00225.p01	BMY_1923.p01	a04b031c37c06570dd644ef46d09ac8c_7506	2cf5bec40a3ef4476bf46f509f729c16_7470	102e21fe2bbcace64a7555dd0bcc9007_7228	4a9cac2c1a817d9acdec143b653b9a80_7006	ac8fed72b32d7540cf9a1b9ac12df95a_7389	197b0243bc5bc4c380ecfb8919a026b1_3978	79ccbe49faa72747a800162f6a36c0ca_7061	614e29224da4f337b8899b3142d81070_7733	d977e7edc1a56720a787e465ab4ce472_7854	e653c257947c2dd0a414de7cb159ba14_7845	31e4ba73e5ddb8c85dea419204f0df5a_7072	752b3971131f3206662b5e22da3b23aa_7261	83683a6c7ca473684645e0830a47223d_7800	03da1bd30b32560bef8e38ea7761d9fe_7272	c648bd7c3a222aa51bed3e3836bcf8c8_7108	B9T21_00230.p01	B9T15_04815.p01	B9T14_00225.p01	B9T11_02520.p01	B9T12_00220.p01	B9T18_04895.p01	B9T13_00225.p01	F387_00880.p01	A6V30_01870.p01
J7607_00420		hypothetical protein	26	26	1	1	2543				2309	2312	2310	B9T10_03905.p01	BMY_0616.p01	a04b031c37c06570dd644ef46d09ac8c_5626	2cf5bec40a3ef4476bf46f509f729c16_5662	102e21fe2bbcace64a7555dd0bcc9007_7526	4a9cac2c1a817d9acdec143b653b9a80_7544	ac8fed72b32d7540cf9a1b9ac12df95a_1411	197b0243bc5bc4c380ecfb8919a026b1_5967	79ccbe49faa72747a800162f6a36c0ca_1792	614e29224da4f337b8899b3142d81070_2323	d977e7edc1a56720a787e465ab4ce472_2336	e653c257947c2dd0a414de7cb159ba14_2323	31e4ba73e5ddb8c85dea419204f0df5a_333	752b3971131f3206662b5e22da3b23aa_2520	83683a6c7ca473684645e0830a47223d_345	03da1bd30b32560bef8e38ea7761d9fe_5956	c648bd7c3a222aa51bed3e3836bcf8c8_939	B9T21_06710.p01	B9T15_01160.p01	B9T14_03870.p01	B9T11_05210.p01	B9T12_04480.p01	B9T18_01220.p01	B9T13_07880.p01	F387_01202.p01	A6V30_06920.p01
cyoE		heme o synthase	26	26	1	1	2577				851	860	851	B9T10_04055.p01	BMY_0646.p01	a04b031c37c06570dd644ef46d09ac8c_5745	2cf5bec40a3ef4476bf46f509f729c16_5542	102e21fe2bbcace64a7555dd0bcc9007_5991	4a9cac2c1a817d9acdec143b653b9a80_6044	ac8fed72b32d7540cf9a1b9ac12df95a_1535	197b0243bc5bc4c380ecfb8919a026b1_6091	79ccbe49faa72747a800162f6a36c0ca_1912	614e29224da4f337b8899b3142d81070_6849	d977e7edc1a56720a787e465ab4ce472_7101	e653c257947c2dd0a414de7cb159ba14_7092	31e4ba73e5ddb8c85dea419204f0df5a_209	752b3971131f3206662b5e22da3b23aa_2400	83683a6c7ca473684645e0830a47223d_225	03da1bd30b32560bef8e38ea7761d9fe_5836	c648bd7c3a222aa51bed3e3836bcf8c8_815	B9T21_06860.p01	B9T15_01010.p01	B9T14_04020.p01	B9T11_05360.p01	B9T12_04330.p01	B9T18_01065.p01	B9T13_08035.p01	F387_01702.p01	A6V30_06765.p01
mutT		8-oxo-dGTP diphosphatase MutT	26	26	1	1	2878				413	416	413	B9T10_04300.p01	BMY_0686.p01	a04b031c37c06570dd644ef46d09ac8c_7797	2cf5bec40a3ef4476bf46f509f729c16_5393	102e21fe2bbcace64a7555dd0bcc9007_5847	4a9cac2c1a817d9acdec143b653b9a80_5899	ac8fed72b32d7540cf9a1b9ac12df95a_1673	197b0243bc5bc4c380ecfb8919a026b1_6224	79ccbe49faa72747a800162f6a36c0ca_2072	614e29224da4f337b8899b3142d81070_6999	d977e7edc1a56720a787e465ab4ce472_6952	e653c257947c2dd0a414de7cb159ba14_6942	31e4ba73e5ddb8c85dea419204f0df5a_75	752b3971131f3206662b5e22da3b23aa_2250	83683a6c7ca473684645e0830a47223d_75	03da1bd30b32560bef8e38ea7761d9fe_7947	c648bd7c3a222aa51bed3e3836bcf8c8_649	B9T21_07070.p01	B9T15_00820.p01	B9T14_04210.p01	B9T11_05550.p01	B9T12_04130.p01	B9T18_00805.p01	B9T13_08225.p01	F387_01742.p01	A6V30_05125.p01
J7602_07670		phosphoglycolate phosphatase	26	26	1	1	2748				674	677	674	B9T10_04795.p01	BMY_0794.p01	a04b031c37c06570dd644ef46d09ac8c_6187	2cf5bec40a3ef4476bf46f509f729c16_5837	102e21fe2bbcace64a7555dd0bcc9007_5353	4a9cac2c1a817d9acdec143b653b9a80_5388	ac8fed72b32d7540cf9a1b9ac12df95a_2068	197b0243bc5bc4c380ecfb8919a026b1_5296	79ccbe49faa72747a800162f6a36c0ca_2467	614e29224da4f337b8899b3142d81070_5965	d977e7edc1a56720a787e465ab4ce472_6087	e653c257947c2dd0a414de7cb159ba14_6072	31e4ba73e5ddb8c85dea419204f0df5a_5471	752b3971131f3206662b5e22da3b23aa_1863	83683a6c7ca473684645e0830a47223d_6600	03da1bd30b32560bef8e38ea7761d9fe_5568	c648bd7c3a222aa51bed3e3836bcf8c8_254	B9T21_07645.p01	B9T15_00315.p01	B9T14_04710.p01	B9T11_06050.p01	B9T12_03630.p01	B9T18_00315.p01	B9T13_08720.p01	F387_01601.p01	A6V30_05620.p01
J7554_03205		DMT family protein	26	26	1	1	2726				353	374	354	B9T10_04900.p01	BMY_0816.p01	a04b031c37c06570dd644ef46d09ac8c_6267	2cf5bec40a3ef4476bf46f509f729c16_5756	102e21fe2bbcace64a7555dd0bcc9007_5273	4a9cac2c1a817d9acdec143b653b9a80_5307	ac8fed72b32d7540cf9a1b9ac12df95a_2153	197b0243bc5bc4c380ecfb8919a026b1_5376	79ccbe49faa72747a800162f6a36c0ca_2548	614e29224da4f337b8899b3142d81070_5884	d977e7edc1a56720a787e465ab4ce472_6006	e653c257947c2dd0a414de7cb159ba14_5991	31e4ba73e5ddb8c85dea419204f0df5a_5552	752b3971131f3206662b5e22da3b23aa_1782	83683a6c7ca473684645e0830a47223d_6680	03da1bd30b32560bef8e38ea7761d9fe_5648	c648bd7c3a222aa51bed3e3836bcf8c8_169	B9T21_07745.p01	B9T15_00215.p01	B9T14_04810.p01	B9T11_06150.p01	B9T12_03525.p01	B9T18_00210.p01	B9T13_08820.p01	F387_01579.p01	A6V30_05725.p01
tal		transaldolase	26	26	1	1	2717				1085	1091	1085	B9T10_04945.p01	BMY_0827.p01	a04b031c37c06570dd644ef46d09ac8c_6303	2cf5bec40a3ef4476bf46f509f729c16_5720	102e21fe2bbcace64a7555dd0bcc9007_5237	4a9cac2c1a817d9acdec143b653b9a80_5271	ac8fed72b32d7540cf9a1b9ac12df95a_2189	197b0243bc5bc4c380ecfb8919a026b1_5412	79ccbe49faa72747a800162f6a36c0ca_2584	614e29224da4f337b8899b3142d81070_5849	d977e7edc1a56720a787e465ab4ce472_5970	e653c257947c2dd0a414de7cb159ba14_5955	31e4ba73e5ddb8c85dea419204f0df5a_5587	752b3971131f3206662b5e22da3b23aa_1746	83683a6c7ca473684645e0830a47223d_6716	03da1bd30b32560bef8e38ea7761d9fe_5684	c648bd7c3a222aa51bed3e3836bcf8c8_133	B9T21_07790.p01	B9T15_00170.p01	B9T14_04855.p01	B9T11_06195.p01	B9T12_03480.p01	B9T18_00165.p01	B9T13_08865.p01	F387_01570.p01	A6V30_05770.p01
J7560_02750		two-component sensor histidine kinase	26	26	1	1	1024				1337	1355	1337	B9T10_08800.p01	BMY_0974.p01	a04b031c37c06570dd644ef46d09ac8c_1462	2cf5bec40a3ef4476bf46f509f729c16_2180	102e21fe2bbcace64a7555dd0bcc9007_2734	4a9cac2c1a817d9acdec143b653b9a80_3105	ac8fed72b32d7540cf9a1b9ac12df95a_3021	197b0243bc5bc4c380ecfb8919a026b1_1497	79ccbe49faa72747a800162f6a36c0ca_3426	614e29224da4f337b8899b3142d81070_2492	d977e7edc1a56720a787e465ab4ce472_3615	e653c257947c2dd0a414de7cb159ba14_3598	31e4ba73e5ddb8c85dea419204f0df5a_2507	752b3971131f3206662b5e22da3b23aa_3530	83683a6c7ca473684645e0830a47223d_4700	03da1bd30b32560bef8e38ea7761d9fe_2718	c648bd7c3a222aa51bed3e3836bcf8c8_5520	B9T21_06045.p01	B9T15_08565.p01	B9T14_08535.p01	B9T11_06870.p01	B9T12_05960.p01	B9T18_08625.p01	B9T13_07230.p01	F387_00447.p01	A6V30_01110.p01
ftsH		ATP-dependent zinc metalloprotease FtsH	26	26	1	1	1013				1817	1877	1848	B9T10_08745.p01	BMY_0985.p01	a04b031c37c06570dd644ef46d09ac8c_1494	2cf5bec40a3ef4476bf46f509f729c16_2148	102e21fe2bbcace64a7555dd0bcc9007_2690	4a9cac2c1a817d9acdec143b653b9a80_3061	ac8fed72b32d7540cf9a1b9ac12df95a_2989	197b0243bc5bc4c380ecfb8919a026b1_1537	79ccbe49faa72747a800162f6a36c0ca_3386	614e29224da4f337b8899b3142d81070_2536	d977e7edc1a56720a787e465ab4ce472_3659	e653c257947c2dd0a414de7cb159ba14_3642	31e4ba73e5ddb8c85dea419204f0df5a_2547	752b3971131f3206662b5e22da3b23aa_3498	83683a6c7ca473684645e0830a47223d_4656	03da1bd30b32560bef8e38ea7761d9fe_2686	c648bd7c3a222aa51bed3e3836bcf8c8_5552	B9T21_05995.p01	B9T15_08525.p01	B9T14_08495.p01	B9T11_06910.p01	B9T12_05905.p01	B9T18_08585.p01	B9T13_07190.p01	F387_00455.p01	A6V30_01070.p01
cysZ		sulfate transporter CysZ	26	26	1	1	883				758	767	758	B9T10_08120.p01	BMY_1114.p01	a04b031c37c06570dd644ef46d09ac8c_1988	2cf5bec40a3ef4476bf46f509f729c16_1656	102e21fe2bbcace64a7555dd0bcc9007_2192	4a9cac2c1a817d9acdec143b653b9a80_2563	ac8fed72b32d7540cf9a1b9ac12df95a_2495	197b0243bc5bc4c380ecfb8919a026b1_2031	79ccbe49faa72747a800162f6a36c0ca_2890	614e29224da4f337b8899b3142d81070_3030	d977e7edc1a56720a787e465ab4ce472_4153	e653c257947c2dd0a414de7cb159ba14_4136	31e4ba73e5ddb8c85dea419204f0df5a_3041	752b3971131f3206662b5e22da3b23aa_3000	83683a6c7ca473684645e0830a47223d_4162	03da1bd30b32560bef8e38ea7761d9fe_2192	c648bd7c3a222aa51bed3e3836bcf8c8_6038	B9T21_05375.p01	B9T15_07905.p01	B9T14_07875.p01	B9T11_07530.p01	B9T12_05285.p01	B9T18_07955.p01	B9T13_06570.p01	F387_00584.p01	A6V30_00455.p01
J7600_05955		membrane integrity-associated transporter subunit PqiC	26	26	1	1	295				581	590	586	B9T10_05685.p01	BMY_1490.p01	a04b031c37c06570dd644ef46d09ac8c_3521	2cf5bec40a3ef4476bf46f509f729c16_4453	102e21fe2bbcace64a7555dd0bcc9007_4924	4a9cac2c1a817d9acdec143b653b9a80_4783	ac8fed72b32d7540cf9a1b9ac12df95a_5536	197b0243bc5bc4c380ecfb8919a026b1_4651	79ccbe49faa72747a800162f6a36c0ca_4918	614e29224da4f337b8899b3142d81070_4727	d977e7edc1a56720a787e465ab4ce472_4974	e653c257947c2dd0a414de7cb159ba14_4827	31e4ba73e5ddb8c85dea419204f0df5a_6067	752b3971131f3206662b5e22da3b23aa_4999	83683a6c7ca473684645e0830a47223d_5285	03da1bd30b32560bef8e38ea7761d9fe_4802	c648bd7c3a222aa51bed3e3836bcf8c8_3916	B9T21_03455.p01	B9T15_05610.p01	B9T14_05595.p01	B9T11_04270.p01	B9T12_08410.p01	B9T18_06975.p01	B9T13_04185.p01	F387_01444.p01	A6V30_08310.p01
odhB		2-oxoglutarate dehydrogenase complex dihydrolipoyllysine-residue succinyltransferase	26	26	1	1	3597				1181	1223	1206	B9T10_06540.p01	BMY_1660.p01	a04b031c37c06570dd644ef46d09ac8c_2866	2cf5bec40a3ef4476bf46f509f729c16_2622	102e21fe2bbcace64a7555dd0bcc9007_3248	4a9cac2c1a817d9acdec143b653b9a80_3872	ac8fed72b32d7540cf9a1b9ac12df95a_3708	197b0243bc5bc4c380ecfb8919a026b1_2748	79ccbe49faa72747a800162f6a36c0ca_3895	614e29224da4f337b8899b3142d81070_4103	d977e7edc1a56720a787e465ab4ce472_2674	e653c257947c2dd0a414de7cb159ba14_3159	31e4ba73e5ddb8c85dea419204f0df5a_3798	752b3971131f3206662b5e22da3b23aa_3972	83683a6c7ca473684645e0830a47223d_2984	03da1bd30b32560bef8e38ea7761d9fe_3419	c648bd7c3a222aa51bed3e3836bcf8c8_4520	B9T21_04280.p01	B9T15_06415.p01	B9T14_06385.p01	B9T11_03470.p01	B9T12_07165.p01	B9T18_06150.p01	B9T13_05090.p01	F387_00758.p01	A6V30_09250.p01
rlmN		23S rRNA (adenine(2503)-C(2))-methyltransferase RlmN	26	26	1	1	3458				1055	1115	1102	B9T10_07170.p01	BMY_1793.p01	a04b031c37c06570dd644ef46d09ac8c_2340	2cf5bec40a3ef4476bf46f509f729c16_3132	102e21fe2bbcace64a7555dd0bcc9007_3770	4a9cac2c1a817d9acdec143b653b9a80_4394	ac8fed72b32d7540cf9a1b9ac12df95a_3184	197b0243bc5bc4c380ecfb8919a026b1_3256	79ccbe49faa72747a800162f6a36c0ca_4404	614e29224da4f337b8899b3142d81070_3595	d977e7edc1a56720a787e465ab4ce472_3182	e653c257947c2dd0a414de7cb159ba14_2651	31e4ba73e5ddb8c85dea419204f0df5a_4308	752b3971131f3206662b5e22da3b23aa_4494	83683a6c7ca473684645e0830a47223d_3492	03da1bd30b32560bef8e38ea7761d9fe_2893	c648bd7c3a222aa51bed3e3836bcf8c8_5042	B9T21_04925.p01	B9T15_07060.p01	B9T14_07030.p01	B9T11_02825.p01	B9T12_07795.p01	B9T18_05520.p01	B9T13_05735.p01	F387_00627.p01	A6V30_09880.p01
murG		undecaprenyldiphospho-muramoylpentapeptide beta-N-acetylglucosaminyltransferase	26	26	1	1	467				1046	1076	1072	B9T10_07405.p01	BMY_1821.p01	a04b031c37c06570dd644ef46d09ac8c_7187	2cf5bec40a3ef4476bf46f509f729c16_7250	102e21fe2bbcace64a7555dd0bcc9007_7133	4a9cac2c1a817d9acdec143b653b9a80_7209	ac8fed72b32d7540cf9a1b9ac12df95a_7093	197b0243bc5bc4c380ecfb8919a026b1_7219	79ccbe49faa72747a800162f6a36c0ca_7300	614e29224da4f337b8899b3142d81070_3487	d977e7edc1a56720a787e465ab4ce472_3290	e653c257947c2dd0a414de7cb159ba14_2543	31e4ba73e5ddb8c85dea419204f0df5a_7523	752b3971131f3206662b5e22da3b23aa_6821	83683a6c7ca473684645e0830a47223d_3600	03da1bd30b32560bef8e38ea7761d9fe_7174	c648bd7c3a222aa51bed3e3836bcf8c8_7347	B9T21_09390.p01	B9T15_07245.p01	B9T14_07215.p01	B9T11_09845.p01	B9T12_09550.p01	B9T18_05355.p01	B9T13_05905.p01	F387_01888.p01	A6V30_07660.p01
hisD		histidinol dehydrogenase	26	26	1	1	1186				1295	1298	1295	B9T10_00140.p01	BMY_1906.p01	a04b031c37c06570dd644ef46d09ac8c_7577	2cf5bec40a3ef4476bf46f509f729c16_7402	102e21fe2bbcace64a7555dd0bcc9007_7296	4a9cac2c1a817d9acdec143b653b9a80_7074	ac8fed72b32d7540cf9a1b9ac12df95a_7460	197b0243bc5bc4c380ecfb8919a026b1_4050	79ccbe49faa72747a800162f6a36c0ca_7131	614e29224da4f337b8899b3142d81070_7665	d977e7edc1a56720a787e465ab4ce472_7786	e653c257947c2dd0a414de7cb159ba14_7778	31e4ba73e5ddb8c85dea419204f0df5a_7143	752b3971131f3206662b5e22da3b23aa_7193	83683a6c7ca473684645e0830a47223d_7867	03da1bd30b32560bef8e38ea7761d9fe_7343	c648bd7c3a222aa51bed3e3836bcf8c8_7036	B9T21_00140.p01	B9T15_04900.p01	B9T14_00140.p01	B9T11_02605.p01	B9T12_00135.p01	B9T18_04980.p01	B9T13_00140.p01	F387_00863.p01	A6V30_01780.p01
B9T13_00195		TAXI family TRAP transporter solute-binding subunit	26	26	1	1	1197				986	1010	996	B9T10_00195.p01	BMY_1917.p01	a04b031c37c06570dd644ef46d09ac8c_7530	2cf5bec40a3ef4476bf46f509f729c16_7446	102e21fe2bbcace64a7555dd0bcc9007_7252	4a9cac2c1a817d9acdec143b653b9a80_7030	ac8fed72b32d7540cf9a1b9ac12df95a_7412	197b0243bc5bc4c380ecfb8919a026b1_4002	79ccbe49faa72747a800162f6a36c0ca_7085	614e29224da4f337b8899b3142d81070_7709	d977e7edc1a56720a787e465ab4ce472_7830	e653c257947c2dd0a414de7cb159ba14_7821	31e4ba73e5ddb8c85dea419204f0df5a_7096	752b3971131f3206662b5e22da3b23aa_7237	83683a6c7ca473684645e0830a47223d_7823	03da1bd30b32560bef8e38ea7761d9fe_7296	c648bd7c3a222aa51bed3e3836bcf8c8_7084	B9T21_00200.p01	B9T15_04845.p01	B9T14_00195.p01	B9T11_02550.p01	B9T12_00190.p01	B9T18_04925.p01	B9T13_00195.p01	F387_00874.p01	A6V30_01840.p01
dprA		DNA-processing protein DprA	26	26	1	1	1366				1121	1127	1121	B9T10_00930.p01	BMY_2073.p01	a04b031c37c06570dd644ef46d09ac8c_4748	2cf5bec40a3ef4476bf46f509f729c16_3727	102e21fe2bbcace64a7555dd0bcc9007_3924	4a9cac2c1a817d9acdec143b653b9a80_1920	ac8fed72b32d7540cf9a1b9ac12df95a_4947	197b0243bc5bc4c380ecfb8919a026b1_3427	79ccbe49faa72747a800162f6a36c0ca_5361	614e29224da4f337b8899b3142d81070_5712	d977e7edc1a56720a787e465ab4ce472_5834	e653c257947c2dd0a414de7cb159ba14_5818	31e4ba73e5ddb8c85dea419204f0df5a_4506	752b3971131f3206662b5e22da3b23aa_5842	83683a6c7ca473684645e0830a47223d_5712	03da1bd30b32560bef8e38ea7761d9fe_4012	c648bd7c3a222aa51bed3e3836bcf8c8_3072	B9T21_00925.p01	B9T15_04095.p01	B9T14_00945.p01	B9T11_01800.p01	B9T12_00940.p01	B9T18_04165.p01	B9T13_00945.p01	F387_01022.p01	A6V30_02560.p01
J7620_06690		U32 family peptidase	26	26	1	1	3706				1919	1922	1920	B9T10_06055.p01	BMY_1562.p01	a04b031c37c06570dd644ef46d09ac8c_3250	2cf5bec40a3ef4476bf46f509f729c16_4705	102e21fe2bbcace64a7555dd0bcc9007_5204	4a9cac2c1a817d9acdec143b653b9a80_4503	ac8fed72b32d7540cf9a1b9ac12df95a_6672	197b0243bc5bc4c380ecfb8919a026b1_4934	79ccbe49faa72747a800162f6a36c0ca_5245	614e29224da4f337b8899b3142d81070_4415	d977e7edc1a56720a787e465ab4ce472_5286	e653c257947c2dd0a414de7cb159ba14_4516	31e4ba73e5ddb8c85dea419204f0df5a_7433	752b3971131f3206662b5e22da3b23aa_5315	83683a6c7ca473684645e0830a47223d_5596	03da1bd30b32560bef8e38ea7761d9fe_4546	c648bd7c3a222aa51bed3e3836bcf8c8_4212	B9T21_03795.p01	B9T15_05930.p01	B9T14_05900.p01	B9T11_03955.p01	B9T12_06775.p01	B9T18_06635.p01	B9T13_04550.p01	F387_01510.p01	A6V30_08765.p01
J7554_07160		RnfABCDGE type electron transport complex subunit B	26	26	1	1	1278				632	641	632	B9T10_00520.p01	BMY_1985.p01	a04b031c37c06570dd644ef46d09ac8c_5075	2cf5bec40a3ef4476bf46f509f729c16_3398	102e21fe2bbcace64a7555dd0bcc9007_4273	4a9cac2c1a817d9acdec143b653b9a80_2270	ac8fed72b32d7540cf9a1b9ac12df95a_5280	197b0243bc5bc4c380ecfb8919a026b1_3757	79ccbe49faa72747a800162f6a36c0ca_5693	614e29224da4f337b8899b3142d81070_5364	d977e7edc1a56720a787e465ab4ce472_5485	e653c257947c2dd0a414de7cb159ba14_5468	31e4ba73e5ddb8c85dea419204f0df5a_4931	752b3971131f3206662b5e22da3b23aa_5512	83683a6c7ca473684645e0830a47223d_6062	03da1bd30b32560bef8e38ea7761d9fe_4341	c648bd7c3a222aa51bed3e3836bcf8c8_3402	B9T21_00515.p01	B9T15_04530.p01	B9T14_00510.p01	B9T11_02235.p01	B9T12_00530.p01	B9T18_04585.p01	B9T13_00510.p01	F387_00939.p01	A6V30_02150.p01
J7620_02540		Smr/MutS family protein	26	26	1	1	2801				596	602	597	B9T10_04595.p01	BMY_0752.p01	a04b031c37c06570dd644ef46d09ac8c_6032	2cf5bec40a3ef4476bf46f509f729c16_5989	102e21fe2bbcace64a7555dd0bcc9007_5553	4a9cac2c1a817d9acdec143b653b9a80_5589	ac8fed72b32d7540cf9a1b9ac12df95a_1913	197b0243bc5bc4c380ecfb8919a026b1_5090	79ccbe49faa72747a800162f6a36c0ca_2312	614e29224da4f337b8899b3142d81070_6166	d977e7edc1a56720a787e465ab4ce472_6288	e653c257947c2dd0a414de7cb159ba14_6275	31e4ba73e5ddb8c85dea419204f0df5a_5277	752b3971131f3206662b5e22da3b23aa_2018	83683a6c7ca473684645e0830a47223d_6397	03da1bd30b32560bef8e38ea7761d9fe_5413	c648bd7c3a222aa51bed3e3836bcf8c8_409	B9T21_07380.p01	B9T15_00515.p01	B9T14_04515.p01	B9T11_05855.p01	B9T12_03830.p01	B9T18_00515.p01	B9T13_08525.p01	F387_01640.p01	A6V30_05425.p01
J7624_08375		SUF system Fe-S cluster assembly regulator	26	26	1	1	3083				452	455	452	B9T10_09395.p01	BMY_1222.p01	a04b031c37c06570dd644ef46d09ac8c_7419	2cf5bec40a3ef4476bf46f509f729c16_6633	102e21fe2bbcace64a7555dd0bcc9007_6790	4a9cac2c1a817d9acdec143b653b9a80_6819	ac8fed72b32d7540cf9a1b9ac12df95a_7208	197b0243bc5bc4c380ecfb8919a026b1_6452	79ccbe49faa72747a800162f6a36c0ca_6452	614e29224da4f337b8899b3142d81070_7501	d977e7edc1a56720a787e465ab4ce472_7530	e653c257947c2dd0a414de7cb159ba14_7521	31e4ba73e5ddb8c85dea419204f0df5a_6985	752b3971131f3206662b5e22da3b23aa_7032	83683a6c7ca473684645e0830a47223d_7713	03da1bd30b32560bef8e38ea7761d9fe_6652	c648bd7c3a222aa51bed3e3836bcf8c8_6865	B9T21_08655.p01	B9T15_09790.p01	B9T14_09760.p01	B9T11_08905.p01	B9T12_08890.p01	B9T18_09885.p01	B9T13_09730.p01	F387_01226.p01	A6V30_06630.p01
group_1403	thiD	bifunctional hydroxymethylpyrimidine kinase/phosphomethylpyrimidine kinase	26	26	1	1	3155				809	815	809	B9T10_09740.p01	BMY_1296.p01	a04b031c37c06570dd644ef46d09ac8c_6606	2cf5bec40a3ef4476bf46f509f729c16_6283	102e21fe2bbcace64a7555dd0bcc9007_6426	4a9cac2c1a817d9acdec143b653b9a80_6456	ac8fed72b32d7540cf9a1b9ac12df95a_6106	197b0243bc5bc4c380ecfb8919a026b1_7365	79ccbe49faa72747a800162f6a36c0ca_6181	614e29224da4f337b8899b3142d81070_6643	d977e7edc1a56720a787e465ab4ce472_6555	e653c257947c2dd0a414de7cb159ba14_6542	31e4ba73e5ddb8c85dea419204f0df5a_6435	752b3971131f3206662b5e22da3b23aa_6234	83683a6c7ca473684645e0830a47223d_7165	03da1bd30b32560bef8e38ea7761d9fe_6380	c648bd7c3a222aa51bed3e3836bcf8c8_6599	B9T21_08310.p01	B9T15_09440.p01	B9T14_09410.p01	B9T11_09250.p01	B9T12_08545.p01	B9T18_09540.p01	B9T13_09385.p01	F387_01294.p01	A6V30_06285.p01
hutG		formimidoylglutamase	26	26	1	1	2803				935	935	935	B9T10_04585.p01	BMY_0750.p01	a04b031c37c06570dd644ef46d09ac8c_6024	2cf5bec40a3ef4476bf46f509f729c16_5997	102e21fe2bbcace64a7555dd0bcc9007_5561	4a9cac2c1a817d9acdec143b653b9a80_5597	ac8fed72b32d7540cf9a1b9ac12df95a_1905	197b0243bc5bc4c380ecfb8919a026b1_5082	79ccbe49faa72747a800162f6a36c0ca_2304	614e29224da4f337b8899b3142d81070_6174	d977e7edc1a56720a787e465ab4ce472_6296	e653c257947c2dd0a414de7cb159ba14_6283	31e4ba73e5ddb8c85dea419204f0df5a_5269	752b3971131f3206662b5e22da3b23aa_2026	83683a6c7ca473684645e0830a47223d_6389	03da1bd30b32560bef8e38ea7761d9fe_5405	c648bd7c3a222aa51bed3e3836bcf8c8_417	B9T21_07370.p01	B9T15_00525.p01	B9T14_04505.p01	B9T11_05845.p01	B9T12_03840.p01	B9T18_00525.p01	B9T13_08515.p01	F387_01642.p01	A6V30_05415.p01
J7600_09870		ABC transporter ATP-binding protein	26	26	1	1	2701				686	686	686	B9T10_05020.p01	BMY_0844.p01	a04b031c37c06570dd644ef46d09ac8c_7716	2cf5bec40a3ef4476bf46f509f729c16_7567	102e21fe2bbcace64a7555dd0bcc9007_7655	4a9cac2c1a817d9acdec143b653b9a80_7648	ac8fed72b32d7540cf9a1b9ac12df95a_7599	197b0243bc5bc4c380ecfb8919a026b1_7666	79ccbe49faa72747a800162f6a36c0ca_7422	614e29224da4f337b8899b3142d81070_7831	d977e7edc1a56720a787e465ab4ce472_7952	e653c257947c2dd0a414de7cb159ba14_7944	31e4ba73e5ddb8c85dea419204f0df5a_7629	752b3971131f3206662b5e22da3b23aa_7529	83683a6c7ca473684645e0830a47223d_6775	03da1bd30b32560bef8e38ea7761d9fe_7805	c648bd7c3a222aa51bed3e3836bcf8c8_74	B9T21_07875.p01	B9T15_00095.p01	B9T14_04930.p01	B9T11_06270.p01	B9T12_03405.p01	B9T18_00090.p01	B9T13_08940.p01	F387_01554.p01	A6V30_05850.p01
J7547_05620		cob(I)yrinic acid a,c-diamide adenosyltransferase	26	26	1	1	140				557	557	557	B9T10_05130.p01	BMY_1376.p01	a04b031c37c06570dd644ef46d09ac8c_3963	2cf5bec40a3ef4476bf46f509f729c16_4009	102e21fe2bbcace64a7555dd0bcc9007_4475	4a9cac2c1a817d9acdec143b653b9a80_5233	ac8fed72b32d7540cf9a1b9ac12df95a_5979	197b0243bc5bc4c380ecfb8919a026b1_4162	79ccbe49faa72747a800162f6a36c0ca_4480	614e29224da4f337b8899b3142d81070_5168	d977e7edc1a56720a787e465ab4ce472_4535	e653c257947c2dd0a414de7cb159ba14_5267	31e4ba73e5ddb8c85dea419204f0df5a_5625	752b3971131f3206662b5e22da3b23aa_4554	83683a6c7ca473684645e0830a47223d_4845	03da1bd30b32560bef8e38ea7761d9fe_5241	c648bd7c3a222aa51bed3e3836bcf8c8_3470	B9T21_02895.p01	B9T15_05050.p01	B9T14_05035.p01	B9T11_04830.p01	B9T12_07850.p01	B9T18_07535.p01	B9T13_03625.p01	F387_01910.p01	A6V30_07385.p01
J7607_07415		2-C-methyl-D-erythritol 4-phosphate cytidylyltransferase	26	26	1	1	250				698	698	698	B9T10_05460.p01	BMY_1446.p01	a04b031c37c06570dd644ef46d09ac8c_3700	2cf5bec40a3ef4476bf46f509f729c16_4276	102e21fe2bbcace64a7555dd0bcc9007_4745	4a9cac2c1a817d9acdec143b653b9a80_4962	ac8fed72b32d7540cf9a1b9ac12df95a_5714	197b0243bc5bc4c380ecfb8919a026b1_4472	79ccbe49faa72747a800162f6a36c0ca_4739	614e29224da4f337b8899b3142d81070_4905	d977e7edc1a56720a787e465ab4ce472_4797	e653c257947c2dd0a414de7cb159ba14_5004	31e4ba73e5ddb8c85dea419204f0df5a_5890	752b3971131f3206662b5e22da3b23aa_4820	83683a6c7ca473684645e0830a47223d_5107	03da1bd30b32560bef8e38ea7761d9fe_4980	c648bd7c3a222aa51bed3e3836bcf8c8_3737	B9T21_03230.p01	B9T15_05385.p01	B9T14_05370.p01	B9T11_04495.p01	B9T12_08185.p01	B9T18_07200.p01	B9T13_03960.p01	F387_01399.p01	A6V30_08085.p01
B9T15_05585		thermonuclease family protein	26	26	1	1	290				530	620	535	B9T10_05660.p01	BMY_1485.p01	a04b031c37c06570dd644ef46d09ac8c_3541	2cf5bec40a3ef4476bf46f509f729c16_4433	102e21fe2bbcace64a7555dd0bcc9007_4904	4a9cac2c1a817d9acdec143b653b9a80_4803	ac8fed72b32d7540cf9a1b9ac12df95a_5556	197b0243bc5bc4c380ecfb8919a026b1_4631	79ccbe49faa72747a800162f6a36c0ca_4898	614e29224da4f337b8899b3142d81070_4746	d977e7edc1a56720a787e465ab4ce472_4954	e653c257947c2dd0a414de7cb159ba14_4847	31e4ba73e5ddb8c85dea419204f0df5a_6047	752b3971131f3206662b5e22da3b23aa_4979	83683a6c7ca473684645e0830a47223d_5265	03da1bd30b32560bef8e38ea7761d9fe_4821	c648bd7c3a222aa51bed3e3836bcf8c8_3896	B9T21_03430.p01	B9T15_05585.p01	B9T14_05570.p01	B9T11_04295.p01	B9T12_08385.p01	B9T18_07000.p01	B9T13_04160.p01	F387_01439.p01	A6V30_08285.p01
dinB		DNA polymerase IV	26	26	1	1	3696				1028	1061	1050	B9T10_06110.p01	BMY_1573.p01	a04b031c37c06570dd644ef46d09ac8c_3205	2cf5bec40a3ef4476bf46f509f729c16_2355	102e21fe2bbcace64a7555dd0bcc9007_2909	4a9cac2c1a817d9acdec143b653b9a80_4458	ac8fed72b32d7540cf9a1b9ac12df95a_4047	197b0243bc5bc4c380ecfb8919a026b1_2409	79ccbe49faa72747a800162f6a36c0ca_3633	614e29224da4f337b8899b3142d81070_4370	d977e7edc1a56720a787e465ab4ce472_2407	e653c257947c2dd0a414de7cb159ba14_3426	31e4ba73e5ddb8c85dea419204f0df5a_3455	752b3971131f3206662b5e22da3b23aa_3705	83683a6c7ca473684645e0830a47223d_2717	03da1bd30b32560bef8e38ea7761d9fe_3762	c648bd7c3a222aa51bed3e3836bcf8c8_4257	B9T21_03850.p01	B9T15_05985.p01	B9T14_05955.p01	B9T11_03900.p01	B9T12_06830.p01	B9T18_06580.p01	B9T13_04660.p01	F387_01528.p01	A6V30_08820.p01
B9T12_06845		hypothetical protein	26	26	1	1	3691				1028	1028	1028	B9T10_06125.p01	BMY_1577.p01	a04b031c37c06570dd644ef46d09ac8c_3193	2cf5bec40a3ef4476bf46f509f729c16_2367	102e21fe2bbcace64a7555dd0bcc9007_2921	4a9cac2c1a817d9acdec143b653b9a80_4446	ac8fed72b32d7540cf9a1b9ac12df95a_4035	197b0243bc5bc4c380ecfb8919a026b1_2421	79ccbe49faa72747a800162f6a36c0ca_3645	614e29224da4f337b8899b3142d81070_4358	d977e7edc1a56720a787e465ab4ce472_2419	e653c257947c2dd0a414de7cb159ba14_3414	31e4ba73e5ddb8c85dea419204f0df5a_3467	752b3971131f3206662b5e22da3b23aa_3717	83683a6c7ca473684645e0830a47223d_2729	03da1bd30b32560bef8e38ea7761d9fe_3750	c648bd7c3a222aa51bed3e3836bcf8c8_4269	B9T21_03865.p01	B9T15_06000.p01	B9T14_05970.p01	B9T11_03885.p01	B9T12_06845.p01	B9T18_06565.p01	B9T13_04675.p01	F387_01531.p01	A6V30_08835.p01
J7547_03925		phosphatidylinositol kinase	26	26	1	1	3640				398	398	398	B9T10_06375.p01	BMY_1625.p01	a04b031c37c06570dd644ef46d09ac8c_2994	2cf5bec40a3ef4476bf46f509f729c16_2566	102e21fe2bbcace64a7555dd0bcc9007_3120	4a9cac2c1a817d9acdec143b653b9a80_3744	ac8fed72b32d7540cf9a1b9ac12df95a_3836	197b0243bc5bc4c380ecfb8919a026b1_2620	79ccbe49faa72747a800162f6a36c0ca_3844	614e29224da4f337b8899b3142d81070_4159	d977e7edc1a56720a787e465ab4ce472_2618	e653c257947c2dd0a414de7cb159ba14_3215	31e4ba73e5ddb8c85dea419204f0df5a_3666	752b3971131f3206662b5e22da3b23aa_3916	83683a6c7ca473684645e0830a47223d_2928	03da1bd30b32560bef8e38ea7761d9fe_3551	c648bd7c3a222aa51bed3e3836bcf8c8_4468	B9T21_04115.p01	B9T15_06250.p01	B9T14_06220.p01	B9T11_03635.p01	B9T12_07095.p01	B9T18_06315.p01	B9T13_04925.p01	F387_00791.p01	A6V30_09080.p01
A6V30_09775		HAD-IA family hydrolase	26	26	1	1	3479				674	674	674	B9T10_07065.p01	BMY_1772.p01	a04b031c37c06570dd644ef46d09ac8c_2424	2cf5bec40a3ef4476bf46f509f729c16_3048	102e21fe2bbcace64a7555dd0bcc9007_3686	4a9cac2c1a817d9acdec143b653b9a80_4310	ac8fed72b32d7540cf9a1b9ac12df95a_3268	197b0243bc5bc4c380ecfb8919a026b1_3172	79ccbe49faa72747a800162f6a36c0ca_4320	614e29224da4f337b8899b3142d81070_3679	d977e7edc1a56720a787e465ab4ce472_3098	e653c257947c2dd0a414de7cb159ba14_2735	31e4ba73e5ddb8c85dea419204f0df5a_4224	752b3971131f3206662b5e22da3b23aa_4410	83683a6c7ca473684645e0830a47223d_3408	03da1bd30b32560bef8e38ea7761d9fe_2977	c648bd7c3a222aa51bed3e3836bcf8c8_4958	B9T21_04820.p01	B9T15_06955.p01	B9T14_06925.p01	B9T11_02930.p01	B9T12_07690.p01	B9T18_05625.p01	B9T13_05630.p01	F387_00648.p01	A6V30_09775.p01
J7553_03795		sel1 repeat family protein	26	26	1	1	1021				1451	1454	1452	B9T10_08775.p01	BMY_0979.p01	a04b031c37c06570dd644ef46d09ac8c_1470	2cf5bec40a3ef4476bf46f509f729c16_2172	102e21fe2bbcace64a7555dd0bcc9007_2714	4a9cac2c1a817d9acdec143b653b9a80_3085	ac8fed72b32d7540cf9a1b9ac12df95a_3013	197b0243bc5bc4c380ecfb8919a026b1_1513	79ccbe49faa72747a800162f6a36c0ca_3410	614e29224da4f337b8899b3142d81070_2512	d977e7edc1a56720a787e465ab4ce472_3635	e653c257947c2dd0a414de7cb159ba14_3618	31e4ba73e5ddb8c85dea419204f0df5a_2523	752b3971131f3206662b5e22da3b23aa_3522	83683a6c7ca473684645e0830a47223d_4680	03da1bd30b32560bef8e38ea7761d9fe_2710	c648bd7c3a222aa51bed3e3836bcf8c8_5528	B9T21_06025.p01	B9T15_08555.p01	B9T14_08525.p01	B9T11_06880.p01	B9T12_05935.p01	B9T18_08615.p01	B9T13_07220.p01	F387_00449.p01	A6V30_01100.p01
F387_00395		glycosyltransferase	26	26	1	1	1075				1007	1007	1007	B9T10_09065.p01	BMY_0919.p01	a04b031c37c06570dd644ef46d09ac8c_6927	2cf5bec40a3ef4476bf46f509f729c16_6862	102e21fe2bbcace64a7555dd0bcc9007_6155	4a9cac2c1a817d9acdec143b653b9a80_3314	ac8fed72b32d7540cf9a1b9ac12df95a_6456	197b0243bc5bc4c380ecfb8919a026b1_6718	79ccbe49faa72747a800162f6a36c0ca_6586	614e29224da4f337b8899b3142d81070_7275	d977e7edc1a56720a787e465ab4ce472_7394	e653c257947c2dd0a414de7cb159ba14_7387	31e4ba73e5ddb8c85dea419204f0df5a_6756	752b3971131f3206662b5e22da3b23aa_6424	83683a6c7ca473684645e0830a47223d_7354	03da1bd30b32560bef8e38ea7761d9fe_6787	c648bd7c3a222aa51bed3e3836bcf8c8_5311	B9T21_06310.p01	B9T15_08830.p01	B9T14_08800.p01	B9T11_06605.p01	B9T12_06225.p01	B9T18_08890.p01	B9T13_07495.p01	F387_00395.p01	A6V30_01370.p01
J7600_08320		ferric reductase-like transmembrane domain-containing protein	26	26	1	1	3164				1214	1310	1306	B9T10_09785.p01	BMY_1305.p01	a04b031c37c06570dd644ef46d09ac8c_6570	2cf5bec40a3ef4476bf46f509f729c16_6319	102e21fe2bbcace64a7555dd0bcc9007_6462	4a9cac2c1a817d9acdec143b653b9a80_6491	ac8fed72b32d7540cf9a1b9ac12df95a_6142	197b0243bc5bc4c380ecfb8919a026b1_7329	79ccbe49faa72747a800162f6a36c0ca_6145	614e29224da4f337b8899b3142d81070_6608	d977e7edc1a56720a787e465ab4ce472_6591	e653c257947c2dd0a414de7cb159ba14_6578	31e4ba73e5ddb8c85dea419204f0df5a_6399	752b3971131f3206662b5e22da3b23aa_6198	83683a6c7ca473684645e0830a47223d_7130	03da1bd30b32560bef8e38ea7761d9fe_6344	c648bd7c3a222aa51bed3e3836bcf8c8_6563	B9T21_08265.p01	B9T15_09395.p01	B9T14_09365.p01	B9T11_09295.p01	B9T12_08500.p01	B9T18_09495.p01	B9T13_09340.p01	F387_01303.p01	A6V30_06240.p01
B9T11_02505		hypothetical protein	26	26	1	1	1208				521	521	521	B9T10_00240.p01	BMY_1926.p01	a04b031c37c06570dd644ef46d09ac8c_7494	2cf5bec40a3ef4476bf46f509f729c16_7481	102e21fe2bbcace64a7555dd0bcc9007_7216	4a9cac2c1a817d9acdec143b653b9a80_6994	ac8fed72b32d7540cf9a1b9ac12df95a_7378	197b0243bc5bc4c380ecfb8919a026b1_3966	79ccbe49faa72747a800162f6a36c0ca_7049	614e29224da4f337b8899b3142d81070_7745	d977e7edc1a56720a787e465ab4ce472_7866	e653c257947c2dd0a414de7cb159ba14_7857	31e4ba73e5ddb8c85dea419204f0df5a_7060	752b3971131f3206662b5e22da3b23aa_7273	83683a6c7ca473684645e0830a47223d_7788	03da1bd30b32560bef8e38ea7761d9fe_7260	c648bd7c3a222aa51bed3e3836bcf8c8_7120	B9T21_00245.p01	B9T15_04800.p01	B9T14_00240.p01	B9T11_02505.p01	B9T12_00235.p01	B9T18_04880.p01	B9T13_00240.p01	F387_00883.p01	A6V30_01885.p01
J7600_06780		GspH/FimT family pseudopilin	26	26	1	1	1283				554	554	554	B9T10_00545.p01	BMY_1989.p01	a04b031c37c06570dd644ef46d09ac8c_5055	2cf5bec40a3ef4476bf46f509f729c16_3418	102e21fe2bbcace64a7555dd0bcc9007_4253	4a9cac2c1a817d9acdec143b653b9a80_2250	ac8fed72b32d7540cf9a1b9ac12df95a_5260	197b0243bc5bc4c380ecfb8919a026b1_3737	79ccbe49faa72747a800162f6a36c0ca_5673	614e29224da4f337b8899b3142d81070_5383	d977e7edc1a56720a787e465ab4ce472_5505	e653c257947c2dd0a414de7cb159ba14_5488	31e4ba73e5ddb8c85dea419204f0df5a_4911	752b3971131f3206662b5e22da3b23aa_5532	83683a6c7ca473684645e0830a47223d_6042	03da1bd30b32560bef8e38ea7761d9fe_4321	c648bd7c3a222aa51bed3e3836bcf8c8_3382	B9T21_00540.p01	B9T15_04505.p01	B9T14_00535.p01	B9T11_02210.p01	B9T12_00555.p01	B9T18_04560.p01	B9T13_00535.p01	F387_00944.p01	A6V30_02175.p01
B9T14_00650		AAA family ATPase	26	26	1	1	1302				3248	3248	3248	B9T10_00640.p01	BMY_2013.p01	a04b031c37c06570dd644ef46d09ac8c_4979	2cf5bec40a3ef4476bf46f509f729c16_3494	102e21fe2bbcace64a7555dd0bcc9007_4161	4a9cac2c1a817d9acdec143b653b9a80_2158	ac8fed72b32d7540cf9a1b9ac12df95a_5185	197b0243bc5bc4c380ecfb8919a026b1_3661	79ccbe49faa72747a800162f6a36c0ca_5599	614e29224da4f337b8899b3142d81070_5475	d977e7edc1a56720a787e465ab4ce472_5597	e653c257947c2dd0a414de7cb159ba14_5580	31e4ba73e5ddb8c85dea419204f0df5a_4740	752b3971131f3206662b5e22da3b23aa_5608	83683a6c7ca473684645e0830a47223d_5950	03da1bd30b32560bef8e38ea7761d9fe_4245	c648bd7c3a222aa51bed3e3836bcf8c8_3306	B9T21_00635.p01	B9T15_04390.p01	B9T14_00650.p01	B9T11_02095.p01	B9T12_00650.p01	B9T18_04465.p01	B9T13_00650.p01	F387_00963.p01	A6V30_02270.p01
B9T15_00365		SPOR domain-containing protein	26	26	1	1	2760				1097	1229	1141	B9T10_04745.p01	BMY_0783.p01	a04b031c37c06570dd644ef46d09ac8c_6147	2cf5bec40a3ef4476bf46f509f729c16_5875	102e21fe2bbcace64a7555dd0bcc9007_5393	4a9cac2c1a817d9acdec143b653b9a80_5428	ac8fed72b32d7540cf9a1b9ac12df95a_2028	197b0243bc5bc4c380ecfb8919a026b1_5256	79ccbe49faa72747a800162f6a36c0ca_2427	614e29224da4f337b8899b3142d81070_6005	d977e7edc1a56720a787e465ab4ce472_6126	e653c257947c2dd0a414de7cb159ba14_6112	31e4ba73e5ddb8c85dea419204f0df5a_5431	752b3971131f3206662b5e22da3b23aa_1903	83683a6c7ca473684645e0830a47223d_6560	03da1bd30b32560bef8e38ea7761d9fe_5528	c648bd7c3a222aa51bed3e3836bcf8c8_294	B9T21_07595.p01	B9T15_00365.p01	B9T14_04660.p01	B9T11_06000.p01	B9T12_03680.p01	B9T18_00365.p01	B9T13_08670.p01	F387_01611.p01	A6V30_05570.p01
J7622_08605		alpha/beta hydrolase	26	26	1	1	2686				797	833	831	B9T10_05090.p01	BMY_0859.p01	a04b031c37c06570dd644ef46d09ac8c_7773	2cf5bec40a3ef4476bf46f509f729c16_7508	102e21fe2bbcace64a7555dd0bcc9007_7596	4a9cac2c1a817d9acdec143b653b9a80_7588	ac8fed72b32d7540cf9a1b9ac12df95a_7659	197b0243bc5bc4c380ecfb8919a026b1_7724	79ccbe49faa72747a800162f6a36c0ca_7481	614e29224da4f337b8899b3142d81070_7772	d977e7edc1a56720a787e465ab4ce472_7893	e653c257947c2dd0a414de7cb159ba14_7884	31e4ba73e5ddb8c85dea419204f0df5a_7689	752b3971131f3206662b5e22da3b23aa_7471	83683a6c7ca473684645e0830a47223d_6834	03da1bd30b32560bef8e38ea7761d9fe_7865	c648bd7c3a222aa51bed3e3836bcf8c8_14	B9T21_07945.p01	B9T15_00025.p01	B9T14_05000.p01	B9T11_06340.p01	B9T12_03335.p01	B9T18_00020.p01	B9T13_09010.p01	F387_01539.p01	A6V30_05920.p01
J7606_06080		DUF4743 domain-containing protein	26	26	1	1	296				890	890	890	B9T10_05690.p01	BMY_1491.p01	a04b031c37c06570dd644ef46d09ac8c_3517	2cf5bec40a3ef4476bf46f509f729c16_4457	102e21fe2bbcace64a7555dd0bcc9007_4928	4a9cac2c1a817d9acdec143b653b9a80_4779	ac8fed72b32d7540cf9a1b9ac12df95a_5532	197b0243bc5bc4c380ecfb8919a026b1_4655	79ccbe49faa72747a800162f6a36c0ca_4922	614e29224da4f337b8899b3142d81070_4723	d977e7edc1a56720a787e465ab4ce472_4978	e653c257947c2dd0a414de7cb159ba14_4823	31e4ba73e5ddb8c85dea419204f0df5a_6071	752b3971131f3206662b5e22da3b23aa_5003	83683a6c7ca473684645e0830a47223d_5289	03da1bd30b32560bef8e38ea7761d9fe_4798	c648bd7c3a222aa51bed3e3836bcf8c8_3920	B9T21_03460.p01	B9T15_05615.p01	B9T14_05600.p01	B9T11_04265.p01	B9T12_08415.p01	B9T18_06970.p01	B9T13_04190.p01	F387_01445.p01	A6V30_08315.p01
B9T12_06670		alpha/beta hydrolase	26	26	1	1	3731				659	659	659	B9T10_05950.p01	BMY_1540.p01	a04b031c37c06570dd644ef46d09ac8c_3338	2cf5bec40a3ef4476bf46f509f729c16_4621	102e21fe2bbcace64a7555dd0bcc9007_5116	4a9cac2c1a817d9acdec143b653b9a80_4591	ac8fed72b32d7540cf9a1b9ac12df95a_6758	197b0243bc5bc4c380ecfb8919a026b1_4846	79ccbe49faa72747a800162f6a36c0ca_5162	614e29224da4f337b8899b3142d81070_4503	d977e7edc1a56720a787e465ab4ce472_5198	e653c257947c2dd0a414de7cb159ba14_4604	31e4ba73e5ddb8c85dea419204f0df5a_7349	752b3971131f3206662b5e22da3b23aa_5227	83683a6c7ca473684645e0830a47223d_5509	03da1bd30b32560bef8e38ea7761d9fe_4634	c648bd7c3a222aa51bed3e3836bcf8c8_4124	B9T21_03690.p01	B9T15_05820.p01	B9T14_05790.p01	B9T11_04065.p01	B9T12_06670.p01	B9T18_06740.p01	B9T13_04440.p01	F387_01486.p01	A6V30_08660.p01
J7561_05715		hypothetical protein	26	26	1	1	3721				245	245	245	B9T10_06000.p01	BMY_1551.p01	a04b031c37c06570dd644ef46d09ac8c_3298	2cf5bec40a3ef4476bf46f509f729c16_4661	102e21fe2bbcace64a7555dd0bcc9007_5156	4a9cac2c1a817d9acdec143b653b9a80_4551	ac8fed72b32d7540cf9a1b9ac12df95a_6719	197b0243bc5bc4c380ecfb8919a026b1_4886	79ccbe49faa72747a800162f6a36c0ca_5201	614e29224da4f337b8899b3142d81070_4463	d977e7edc1a56720a787e465ab4ce472_5238	e653c257947c2dd0a414de7cb159ba14_4564	31e4ba73e5ddb8c85dea419204f0df5a_7389	752b3971131f3206662b5e22da3b23aa_5267	83683a6c7ca473684645e0830a47223d_5548	03da1bd30b32560bef8e38ea7761d9fe_4594	c648bd7c3a222aa51bed3e3836bcf8c8_4164	B9T21_03740.p01	B9T15_05870.p01	B9T14_05840.p01	B9T11_04015.p01	B9T12_06720.p01	B9T18_06690.p01	B9T13_04490.p01	F387_01496.p01	A6V30_08710.p01
fdhD		formate dehydrogenase accessory sulfurtransferase FdhD	26	26	1	1	3689				752	776	775	B9T10_06130.p01	BMY_1578.p01	a04b031c37c06570dd644ef46d09ac8c_3189	2cf5bec40a3ef4476bf46f509f729c16_2371	102e21fe2bbcace64a7555dd0bcc9007_2925	4a9cac2c1a817d9acdec143b653b9a80_4442	ac8fed72b32d7540cf9a1b9ac12df95a_4031	197b0243bc5bc4c380ecfb8919a026b1_2425	79ccbe49faa72747a800162f6a36c0ca_3649	614e29224da4f337b8899b3142d81070_4354	d977e7edc1a56720a787e465ab4ce472_2423	e653c257947c2dd0a414de7cb159ba14_3410	31e4ba73e5ddb8c85dea419204f0df5a_3471	752b3971131f3206662b5e22da3b23aa_3721	83683a6c7ca473684645e0830a47223d_2733	03da1bd30b32560bef8e38ea7761d9fe_3746	c648bd7c3a222aa51bed3e3836bcf8c8_4273	B9T21_03870.p01	B9T15_06005.p01	B9T14_05975.p01	B9T11_03880.p01	B9T12_06850.p01	B9T18_06560.p01	B9T13_04680.p01	F387_01532.p01	A6V30_08840.p01
J7552_03435		HAD family phosphatase	26	26	1	1	3602				713	713	713	B9T10_06515.p01	BMY_1655.p01	a04b031c37c06570dd644ef46d09ac8c_2886	2cf5bec40a3ef4476bf46f509f729c16_2602	102e21fe2bbcace64a7555dd0bcc9007_3228	4a9cac2c1a817d9acdec143b653b9a80_3852	ac8fed72b32d7540cf9a1b9ac12df95a_3728	197b0243bc5bc4c380ecfb8919a026b1_2728	79ccbe49faa72747a800162f6a36c0ca_3875	614e29224da4f337b8899b3142d81070_4123	d977e7edc1a56720a787e465ab4ce472_2654	e653c257947c2dd0a414de7cb159ba14_3179	31e4ba73e5ddb8c85dea419204f0df5a_3778	752b3971131f3206662b5e22da3b23aa_3952	83683a6c7ca473684645e0830a47223d_2964	03da1bd30b32560bef8e38ea7761d9fe_3439	c648bd7c3a222aa51bed3e3836bcf8c8_4500	B9T21_04255.p01	B9T15_06390.p01	B9T14_06360.p01	B9T11_03495.p01	B9T12_07140.p01	B9T18_06175.p01	B9T13_05065.p01	F387_00763.p01	A6V30_09225.p01
J7602_03415		hypothetical protein	26	26	1	1	3586				146	188	183	B9T10_06590.p01	BMY_1672.p01	a04b031c37c06570dd644ef46d09ac8c_2825	2cf5bec40a3ef4476bf46f509f729c16_2663	102e21fe2bbcace64a7555dd0bcc9007_3289	4a9cac2c1a817d9acdec143b653b9a80_3913	ac8fed72b32d7540cf9a1b9ac12df95a_3667	197b0243bc5bc4c380ecfb8919a026b1_2789	79ccbe49faa72747a800162f6a36c0ca_3936	614e29224da4f337b8899b3142d81070_4062	d977e7edc1a56720a787e465ab4ce472_2715	e653c257947c2dd0a414de7cb159ba14_3118	31e4ba73e5ddb8c85dea419204f0df5a_3839	752b3971131f3206662b5e22da3b23aa_4013	83683a6c7ca473684645e0830a47223d_3025	03da1bd30b32560bef8e38ea7761d9fe_3378	c648bd7c3a222aa51bed3e3836bcf8c8_4561	B9T21_04330.p01	B9T15_06465.p01	B9T14_06435.p01	B9T11_03420.p01	B9T12_07215.p01	B9T18_06100.p01	B9T13_05140.p01	F387_00748.p01	A6V30_09300.p01
queD		6-carboxytetrahydropterin synthase QueD	26	26	1	1	3542				425	425	425	B9T10_06790.p01	BMY_1714.p01	a04b031c37c06570dd644ef46d09ac8c_2656	2cf5bec40a3ef4476bf46f509f729c16_2828	102e21fe2bbcace64a7555dd0bcc9007_3454	4a9cac2c1a817d9acdec143b653b9a80_4078	ac8fed72b32d7540cf9a1b9ac12df95a_3499	197b0243bc5bc4c380ecfb8919a026b1_2952	79ccbe49faa72747a800162f6a36c0ca_4101	614e29224da4f337b8899b3142d81070_3899	d977e7edc1a56720a787e465ab4ce472_2878	e653c257947c2dd0a414de7cb159ba14_2955	31e4ba73e5ddb8c85dea419204f0df5a_4004	752b3971131f3206662b5e22da3b23aa_4178	83683a6c7ca473684645e0830a47223d_3188	03da1bd30b32560bef8e38ea7761d9fe_3209	c648bd7c3a222aa51bed3e3836bcf8c8_4726	B9T21_04530.p01	B9T15_06665.p01	B9T14_06635.p01	B9T11_03220.p01	B9T12_07415.p01	B9T18_05900.p01	B9T13_05340.p01	F387_00706.p01	A6V30_09500.p01
xseA		exodeoxyribonuclease VII large subunit	26	26	1	1	3464				1271	1298	1272	B9T10_07140.p01	BMY_1787.p01	a04b031c37c06570dd644ef46d09ac8c_2364	2cf5bec40a3ef4476bf46f509f729c16_3108	102e21fe2bbcace64a7555dd0bcc9007_3746	4a9cac2c1a817d9acdec143b653b9a80_4370	ac8fed72b32d7540cf9a1b9ac12df95a_3208	197b0243bc5bc4c380ecfb8919a026b1_3232	79ccbe49faa72747a800162f6a36c0ca_4380	614e29224da4f337b8899b3142d81070_3619	d977e7edc1a56720a787e465ab4ce472_3158	e653c257947c2dd0a414de7cb159ba14_2675	31e4ba73e5ddb8c85dea419204f0df5a_4284	752b3971131f3206662b5e22da3b23aa_4470	83683a6c7ca473684645e0830a47223d_3468	03da1bd30b32560bef8e38ea7761d9fe_2917	c648bd7c3a222aa51bed3e3836bcf8c8_5018	B9T21_04895.p01	B9T15_07030.p01	B9T14_07000.p01	B9T11_02855.p01	B9T12_07765.p01	B9T18_05550.p01	B9T13_05705.p01	F387_00633.p01	A6V30_09850.p01
B9T18_05255		CCA tRNA nucleotidyltransferase	26	26	1	1	446				1139	1151	1139	B9T10_07505.p01	BMY_1841.p01	a04b031c37c06570dd644ef46d09ac8c_7107	2cf5bec40a3ef4476bf46f509f729c16_7170	102e21fe2bbcace64a7555dd0bcc9007_7054	4a9cac2c1a817d9acdec143b653b9a80_7288	ac8fed72b32d7540cf9a1b9ac12df95a_7013	197b0243bc5bc4c380ecfb8919a026b1_7140	79ccbe49faa72747a800162f6a36c0ca_7379	614e29224da4f337b8899b3142d81070_3407	d977e7edc1a56720a787e465ab4ce472_3370	e653c257947c2dd0a414de7cb159ba14_2463	31e4ba73e5ddb8c85dea419204f0df5a_7443	752b3971131f3206662b5e22da3b23aa_6741	83683a6c7ca473684645e0830a47223d_3680	03da1bd30b32560bef8e38ea7761d9fe_7094	c648bd7c3a222aa51bed3e3836bcf8c8_7425	B9T21_09490.p01	B9T15_07345.p01	B9T14_07315.p01	B9T11_09745.p01	B9T12_09450.p01	B9T18_05255.p01	B9T13_06005.p01	F387_01868.p01	A6V30_07560.p01
J7553_03345		DUF1294 domain-containing protein	26	26	1	1	925				464	485	464	B9T10_08320.p01	BMY_1072.p01	a04b031c37c06570dd644ef46d09ac8c_1828	2cf5bec40a3ef4476bf46f509f729c16_1816	102e21fe2bbcace64a7555dd0bcc9007_2352	4a9cac2c1a817d9acdec143b653b9a80_2723	ac8fed72b32d7540cf9a1b9ac12df95a_2655	197b0243bc5bc4c380ecfb8919a026b1_1871	79ccbe49faa72747a800162f6a36c0ca_3050	614e29224da4f337b8899b3142d81070_2870	d977e7edc1a56720a787e465ab4ce472_3993	e653c257947c2dd0a414de7cb159ba14_3976	31e4ba73e5ddb8c85dea419204f0df5a_2881	752b3971131f3206662b5e22da3b23aa_3160	83683a6c7ca473684645e0830a47223d_4322	03da1bd30b32560bef8e38ea7761d9fe_2352	c648bd7c3a222aa51bed3e3836bcf8c8_5882	B9T21_05575.p01	B9T15_08105.p01	B9T14_08075.p01	B9T11_07330.p01	B9T12_05485.p01	B9T18_08155.p01	B9T13_06770.p01	F387_00544.p01	A6V30_00650.p01
B143_RS0108540		asparaginase	26	26	1	1	3125				947	947	947	B9T10_09605.p01	BMY_1266.p01	a04b031c37c06570dd644ef46d09ac8c_6715	2cf5bec40a3ef4476bf46f509f729c16_6175	102e21fe2bbcace64a7555dd0bcc9007_7406	4a9cac2c1a817d9acdec143b653b9a80_7400	ac8fed72b32d7540cf9a1b9ac12df95a_5997	197b0243bc5bc4c380ecfb8919a026b1_7474	79ccbe49faa72747a800162f6a36c0ca_6289	614e29224da4f337b8899b3142d81070_6751	d977e7edc1a56720a787e465ab4ce472_6446	e653c257947c2dd0a414de7cb159ba14_6433	31e4ba73e5ddb8c85dea419204f0df5a_6544	752b3971131f3206662b5e22da3b23aa_6342	83683a6c7ca473684645e0830a47223d_7273	03da1bd30b32560bef8e38ea7761d9fe_6489	c648bd7c3a222aa51bed3e3836bcf8c8_6705	B9T21_08445.p01	B9T15_09575.p01	B9T14_09545.p01	B9T11_09115.p01	B9T12_08680.p01	B9T18_09670.p01	B9T13_09520.p01	F387_01268.p01	A6V30_06415.p01
J7547_03415		hypothetical protein	26	26	1	1	1023				803	809	806	B9T10_08780.p01	BMY_0978.p01	a04b031c37c06570dd644ef46d09ac8c_1466	2cf5bec40a3ef4476bf46f509f729c16_2176	102e21fe2bbcace64a7555dd0bcc9007_2718	4a9cac2c1a817d9acdec143b653b9a80_3089	ac8fed72b32d7540cf9a1b9ac12df95a_3017	197b0243bc5bc4c380ecfb8919a026b1_1501	79ccbe49faa72747a800162f6a36c0ca_3422	614e29224da4f337b8899b3142d81070_2508	d977e7edc1a56720a787e465ab4ce472_3631	e653c257947c2dd0a414de7cb159ba14_3614	31e4ba73e5ddb8c85dea419204f0df5a_2511	752b3971131f3206662b5e22da3b23aa_3526	83683a6c7ca473684645e0830a47223d_4684	03da1bd30b32560bef8e38ea7761d9fe_2714	c648bd7c3a222aa51bed3e3836bcf8c8_5524	B9T21_06040.p01	B9T15_08560.p01	B9T14_08530.p01	B9T11_06875.p01	B9T12_05940.p01	B9T18_08620.p01	B9T13_07225.p01	F387_00448.p01	A6V30_01105.p01
B9T13_00100		MliC family protein	26	26	1	1	1177				347	347	347	B9T10_00100.p01	BMY_1897.p01	a04b031c37c06570dd644ef46d09ac8c_7608	2cf5bec40a3ef4476bf46f509f729c16_7374	102e21fe2bbcace64a7555dd0bcc9007_7328	4a9cac2c1a817d9acdec143b653b9a80_7105	ac8fed72b32d7540cf9a1b9ac12df95a_7491	197b0243bc5bc4c380ecfb8919a026b1_4078	79ccbe49faa72747a800162f6a36c0ca_7161	614e29224da4f337b8899b3142d81070_7633	d977e7edc1a56720a787e465ab4ce472_7755	e653c257947c2dd0a414de7cb159ba14_7747	31e4ba73e5ddb8c85dea419204f0df5a_7175	752b3971131f3206662b5e22da3b23aa_7161	83683a6c7ca473684645e0830a47223d_7898	03da1bd30b32560bef8e38ea7761d9fe_7375	c648bd7c3a222aa51bed3e3836bcf8c8_7004	B9T21_00100.p01	B9T15_04940.p01	B9T14_00100.p01	B9T11_02645.p01	B9T12_00095.p01	B9T18_05020.p01	B9T13_00100.p01	F387_00855.p01	A6V30_01740.p01
J7600_07280		acyl-CoA dehydrogenase family protein	26	26	1	1	1385				1178	1178	1178	B9T10_01020.p01	BMY_2093.p01	a04b031c37c06570dd644ef46d09ac8c_4676	2cf5bec40a3ef4476bf46f509f729c16_3799	102e21fe2bbcace64a7555dd0bcc9007_3854	4a9cac2c1a817d9acdec143b653b9a80_1848	ac8fed72b32d7540cf9a1b9ac12df95a_4875	197b0243bc5bc4c380ecfb8919a026b1_3355	79ccbe49faa72747a800162f6a36c0ca_5289	614e29224da4f337b8899b3142d81070_5784	d977e7edc1a56720a787e465ab4ce472_5906	e653c257947c2dd0a414de7cb159ba14_5890	31e4ba73e5ddb8c85dea419204f0df5a_4434	752b3971131f3206662b5e22da3b23aa_5914	83683a6c7ca473684645e0830a47223d_5640	03da1bd30b32560bef8e38ea7761d9fe_3940	c648bd7c3a222aa51bed3e3836bcf8c8_3000	B9T21_01015.p01	B9T15_04005.p01	B9T14_01035.p01	B9T11_01710.p01	B9T12_01030.p01	B9T18_04075.p01	B9T13_01035.p01	F387_01040.p01	A6V30_02650.p01
J7602_02950		single-stranded DNA-binding protein	26	26	1	1	2546				311	311	311	B9T10_03915.p01	BMY_0618.p01	a04b031c37c06570dd644ef46d09ac8c_5634	2cf5bec40a3ef4476bf46f509f729c16_5654	102e21fe2bbcace64a7555dd0bcc9007_7518	4a9cac2c1a817d9acdec143b653b9a80_7552	ac8fed72b32d7540cf9a1b9ac12df95a_1419	197b0243bc5bc4c380ecfb8919a026b1_5975	79ccbe49faa72747a800162f6a36c0ca_1800	614e29224da4f337b8899b3142d81070_2331	d977e7edc1a56720a787e465ab4ce472_2344	e653c257947c2dd0a414de7cb159ba14_2331	31e4ba73e5ddb8c85dea419204f0df5a_325	752b3971131f3206662b5e22da3b23aa_2512	83683a6c7ca473684645e0830a47223d_337	03da1bd30b32560bef8e38ea7761d9fe_5948	c648bd7c3a222aa51bed3e3836bcf8c8_931	B9T21_06720.p01	B9T15_01150.p01	B9T14_03880.p01	B9T11_05220.p01	B9T12_04470.p01	B9T18_01210.p01	B9T13_07890.p01	F387_01204.p01	A6V30_06910.p01
J7558_07105		hypothetical protein	26	26	1	1	2550				284	284	284	B9T10_03935.p01	BMY_0622.p01	a04b031c37c06570dd644ef46d09ac8c_5650	2cf5bec40a3ef4476bf46f509f729c16_5638	102e21fe2bbcace64a7555dd0bcc9007_7502	4a9cac2c1a817d9acdec143b653b9a80_7568	ac8fed72b32d7540cf9a1b9ac12df95a_1435	197b0243bc5bc4c380ecfb8919a026b1_5991	79ccbe49faa72747a800162f6a36c0ca_1816	614e29224da4f337b8899b3142d81070_2347	d977e7edc1a56720a787e465ab4ce472_2360	e653c257947c2dd0a414de7cb159ba14_2347	31e4ba73e5ddb8c85dea419204f0df5a_309	752b3971131f3206662b5e22da3b23aa_2496	83683a6c7ca473684645e0830a47223d_321	03da1bd30b32560bef8e38ea7761d9fe_5932	c648bd7c3a222aa51bed3e3836bcf8c8_915	B9T21_06740.p01	B9T15_01130.p01	B9T14_03900.p01	B9T11_05240.p01	B9T12_04450.p01	B9T18_01190.p01	B9T13_07910.p01	F387_01208.p01	A6V30_06890.p01
J7553_02065		XdhC family protein	26	26	1	1	2888				977	977	977	B9T10_04255.p01	BMY_0677.p01	a04b031c37c06570dd644ef46d09ac8c_5847	2cf5bec40a3ef4476bf46f509f729c16_5441	102e21fe2bbcace64a7555dd0bcc9007_5883	4a9cac2c1a817d9acdec143b653b9a80_5935	ac8fed72b32d7540cf9a1b9ac12df95a_1637	197b0243bc5bc4c380ecfb8919a026b1_6189	79ccbe49faa72747a800162f6a36c0ca_2024	614e29224da4f337b8899b3142d81070_6963	d977e7edc1a56720a787e465ab4ce472_6988	e653c257947c2dd0a414de7cb159ba14_6978	31e4ba73e5ddb8c85dea419204f0df5a_111	752b3971131f3206662b5e22da3b23aa_2286	83683a6c7ca473684645e0830a47223d_111	03da1bd30b32560bef8e38ea7761d9fe_5736	c648bd7c3a222aa51bed3e3836bcf8c8_685	B9T21_07010.p01	B9T15_00880.p01	B9T14_04150.p01	B9T11_05490.p01	B9T12_04190.p01	B9T18_00850.p01	B9T13_08165.p01	F387_01730.p01	A6V30_05080.p01
folC		bifunctional tetrahydrofolate synthase/dihydrofolate synthase	26	26	1	1	2811				1277	1277	1277	B9T10_04545.p01	BMY_0742.p01	a04b031c37c06570dd644ef46d09ac8c_5992	2cf5bec40a3ef4476bf46f509f729c16_6029	102e21fe2bbcace64a7555dd0bcc9007_5593	4a9cac2c1a817d9acdec143b653b9a80_5629	ac8fed72b32d7540cf9a1b9ac12df95a_1873	197b0243bc5bc4c380ecfb8919a026b1_5052	79ccbe49faa72747a800162f6a36c0ca_2272	614e29224da4f337b8899b3142d81070_6206	d977e7edc1a56720a787e465ab4ce472_6328	e653c257947c2dd0a414de7cb159ba14_6315	31e4ba73e5ddb8c85dea419204f0df5a_5237	752b3971131f3206662b5e22da3b23aa_2058	83683a6c7ca473684645e0830a47223d_6357	03da1bd30b32560bef8e38ea7761d9fe_5373	c648bd7c3a222aa51bed3e3836bcf8c8_449	B9T21_07330.p01	B9T15_00565.p01	B9T14_04465.p01	B9T11_05805.p01	B9T12_03880.p01	B9T18_00565.p01	B9T13_08475.p01	F387_01650.p01	A6V30_05375.p01
J7607_09690		SEC-C domain-containing protein	26	26	1	1	2685				290	392	380	B9T10_05095.p01	BMY_0860.p01	a04b031c37c06570dd644ef46d09ac8c_7777	2cf5bec40a3ef4476bf46f509f729c16_7504	102e21fe2bbcace64a7555dd0bcc9007_7592	4a9cac2c1a817d9acdec143b653b9a80_7584	ac8fed72b32d7540cf9a1b9ac12df95a_7663	197b0243bc5bc4c380ecfb8919a026b1_7728	79ccbe49faa72747a800162f6a36c0ca_7485	614e29224da4f337b8899b3142d81070_7768	d977e7edc1a56720a787e465ab4ce472_7889	e653c257947c2dd0a414de7cb159ba14_7880	31e4ba73e5ddb8c85dea419204f0df5a_7693	752b3971131f3206662b5e22da3b23aa_7467	83683a6c7ca473684645e0830a47223d_6838	03da1bd30b32560bef8e38ea7761d9fe_7869	c648bd7c3a222aa51bed3e3836bcf8c8_10	B9T21_07950.p01	B9T15_00020.p01	B9T14_05005.p01	B9T11_06345.p01	B9T12_03330.p01	B9T18_00015.p01	B9T13_09015.p01	F387_01538.p01	A6V30_05925.p01
ung		uracil-DNA glycosylase	26	26	1	1	299				665	686	680	B9T10_05700.p01	BMY_1493.p01	a04b031c37c06570dd644ef46d09ac8c_3509	2cf5bec40a3ef4476bf46f509f729c16_4465	102e21fe2bbcace64a7555dd0bcc9007_4936	4a9cac2c1a817d9acdec143b653b9a80_4771	ac8fed72b32d7540cf9a1b9ac12df95a_5525	197b0243bc5bc4c380ecfb8919a026b1_4663	79ccbe49faa72747a800162f6a36c0ca_4930	614e29224da4f337b8899b3142d81070_4715	d977e7edc1a56720a787e465ab4ce472_4986	e653c257947c2dd0a414de7cb159ba14_4815	31e4ba73e5ddb8c85dea419204f0df5a_6079	752b3971131f3206662b5e22da3b23aa_5011	83683a6c7ca473684645e0830a47223d_5297	03da1bd30b32560bef8e38ea7761d9fe_4790	c648bd7c3a222aa51bed3e3836bcf8c8_3928	B9T21_03470.p01	B9T15_05625.p01	B9T14_05610.p01	B9T11_04255.p01	B9T12_08425.p01	B9T18_06960.p01	B9T13_04200.p01	F387_01447.p01	A6V30_08325.p01
ribD		bifunctional diaminohydroxyphosphoribosylaminopyrimidine deaminase/5-amino-6-(5-phosphoribosylamino)uracil reductase RibD	26	26	1	1	3591				1106	1106	1106	B9T10_06565.p01	BMY_1666.p01	a04b031c37c06570dd644ef46d09ac8c_2846	2cf5bec40a3ef4476bf46f509f729c16_2643	102e21fe2bbcace64a7555dd0bcc9007_3269	4a9cac2c1a817d9acdec143b653b9a80_3893	ac8fed72b32d7540cf9a1b9ac12df95a_3688	197b0243bc5bc4c380ecfb8919a026b1_2769	79ccbe49faa72747a800162f6a36c0ca_3916	614e29224da4f337b8899b3142d81070_4083	d977e7edc1a56720a787e465ab4ce472_2695	e653c257947c2dd0a414de7cb159ba14_3139	31e4ba73e5ddb8c85dea419204f0df5a_3819	752b3971131f3206662b5e22da3b23aa_3993	83683a6c7ca473684645e0830a47223d_3005	03da1bd30b32560bef8e38ea7761d9fe_3399	c648bd7c3a222aa51bed3e3836bcf8c8_4541	B9T21_04305.p01	B9T15_06440.p01	B9T14_06410.p01	B9T11_03445.p01	B9T12_07190.p01	B9T18_06125.p01	B9T13_05115.p01	F387_00753.p01	A6V30_09275.p01
queE		7-carboxy-7-deazaguanine synthase QueE	26	26	1	1	3541				692	707	706	B9T10_06795.p01	BMY_1715.p01	a04b031c37c06570dd644ef46d09ac8c_2652	2cf5bec40a3ef4476bf46f509f729c16_2832	102e21fe2bbcace64a7555dd0bcc9007_3458	4a9cac2c1a817d9acdec143b653b9a80_4082	ac8fed72b32d7540cf9a1b9ac12df95a_3495	197b0243bc5bc4c380ecfb8919a026b1_2956	79ccbe49faa72747a800162f6a36c0ca_4104	614e29224da4f337b8899b3142d81070_3895	d977e7edc1a56720a787e465ab4ce472_2882	e653c257947c2dd0a414de7cb159ba14_2951	31e4ba73e5ddb8c85dea419204f0df5a_4008	752b3971131f3206662b5e22da3b23aa_4182	83683a6c7ca473684645e0830a47223d_3192	03da1bd30b32560bef8e38ea7761d9fe_3205	c648bd7c3a222aa51bed3e3836bcf8c8_4730	B9T21_04535.p01	B9T15_06670.p01	B9T14_06640.p01	B9T11_03215.p01	B9T12_07420.p01	B9T18_05895.p01	B9T13_05345.p01	F387_00705.p01	A6V30_09505.p01
A6V30_00160		alpha/beta fold hydrolase	26	26	1	1	787				671	731	673	B9T10_07800.p01	BMY_1169.p01	a04b031c37c06570dd644ef46d09ac8c_2147	2cf5bec40a3ef4476bf46f509f729c16_1421	102e21fe2bbcace64a7555dd0bcc9007_1909	4a9cac2c1a817d9acdec143b653b9a80_6318	ac8fed72b32d7540cf9a1b9ac12df95a_2336	197b0243bc5bc4c380ecfb8919a026b1_2238	79ccbe49faa72747a800162f6a36c0ca_2727	614e29224da4f337b8899b3142d81070_3287	d977e7edc1a56720a787e465ab4ce472_4410	e653c257947c2dd0a414de7cb159ba14_4393	31e4ba73e5ddb8c85dea419204f0df5a_3292	752b3971131f3206662b5e22da3b23aa_2777	83683a6c7ca473684645e0830a47223d_3905	03da1bd30b32560bef8e38ea7761d9fe_1993	c648bd7c3a222aa51bed3e3836bcf8c8_6201	B9T21_05170.p01	B9T15_07630.p01	B9T14_07600.p01	B9T11_09935.p01	B9T12_05040.p01	B9T18_07700.p01	B9T13_06295.p01	F387_01802.p01	A6V30_00160.p01
J7558_02510		oxidoreductase	26	26	1	1	881				983	983	983	B9T10_08110.p01	BMY_1116.p01	a04b031c37c06570dd644ef46d09ac8c_1996	2cf5bec40a3ef4476bf46f509f729c16_1648	102e21fe2bbcace64a7555dd0bcc9007_2184	4a9cac2c1a817d9acdec143b653b9a80_2555	ac8fed72b32d7540cf9a1b9ac12df95a_2487	197b0243bc5bc4c380ecfb8919a026b1_2039	79ccbe49faa72747a800162f6a36c0ca_2882	614e29224da4f337b8899b3142d81070_3038	d977e7edc1a56720a787e465ab4ce472_4161	e653c257947c2dd0a414de7cb159ba14_4144	31e4ba73e5ddb8c85dea419204f0df5a_3049	752b3971131f3206662b5e22da3b23aa_2992	83683a6c7ca473684645e0830a47223d_4154	03da1bd30b32560bef8e38ea7761d9fe_2184	c648bd7c3a222aa51bed3e3836bcf8c8_6046	B9T21_05365.p01	B9T15_07895.p01	B9T14_07865.p01	B9T11_07540.p01	B9T12_05275.p01	B9T18_07945.p01	B9T13_06560.p01	F387_00586.p01	A6V30_00445.p01
holB		DNA polymerase III subunit delta'	26	26	1	1	1115				941	941	941	B9T10_09210.p01	BMY_0889.p01	a04b031c37c06570dd644ef46d09ac8c_6813	2cf5bec40a3ef4476bf46f509f729c16_6976	102e21fe2bbcace64a7555dd0bcc9007_6270	4a9cac2c1a817d9acdec143b653b9a80_3429	ac8fed72b32d7540cf9a1b9ac12df95a_6570	197b0243bc5bc4c380ecfb8919a026b1_6603	79ccbe49faa72747a800162f6a36c0ca_6699	614e29224da4f337b8899b3142d81070_7161	d977e7edc1a56720a787e465ab4ce472_7280	e653c257947c2dd0a414de7cb159ba14_7272	31e4ba73e5ddb8c85dea419204f0df5a_6642	752b3971131f3206662b5e22da3b23aa_6539	83683a6c7ca473684645e0830a47223d_7468	03da1bd30b32560bef8e38ea7761d9fe_6900	c648bd7c3a222aa51bed3e3836bcf8c8_5196	B9T21_06455.p01	B9T15_08975.p01	B9T14_08945.p01	B9T11_06460.p01	B9T12_06370.p01	B9T18_09035.p01	B9T13_07640.p01	F387_00366.p01	A6V30_01515.p01
pbpC		penicillin-binding protein 1C	26	26	1	1	3144				1313	2195	2155	B9T10_09685.p01	BMY_1285.p01	a04b031c37c06570dd644ef46d09ac8c_6651	2cf5bec40a3ef4476bf46f509f729c16_6238	102e21fe2bbcace64a7555dd0bcc9007_7470	4a9cac2c1a817d9acdec143b653b9a80_7463	ac8fed72b32d7540cf9a1b9ac12df95a_6061	197b0243bc5bc4c380ecfb8919a026b1_7410	79ccbe49faa72747a800162f6a36c0ca_6226	614e29224da4f337b8899b3142d81070_6688	d977e7edc1a56720a787e465ab4ce472_6510	e653c257947c2dd0a414de7cb159ba14_6497	31e4ba73e5ddb8c85dea419204f0df5a_6480	752b3971131f3206662b5e22da3b23aa_6279	83683a6c7ca473684645e0830a47223d_7209	03da1bd30b32560bef8e38ea7761d9fe_6425	c648bd7c3a222aa51bed3e3836bcf8c8_6642	B9T21_08365.p01	B9T15_09495.p01	B9T14_09465.p01	B9T11_09195.p01	B9T12_08600.p01	B9T18_09595.p01	B9T13_09440.p01	F387_01283.p01	A6V30_06340.p01
rsmD		16S rRNA (guanine(966)-N(2))-methyltransferase RsmD	26	26	1	1	3045				566	605	596	B9T10_09875.p01	BMY_1323.p01	a04b031c37c06570dd644ef46d09ac8c_6499	2cf5bec40a3ef4476bf46f509f729c16_6391	102e21fe2bbcace64a7555dd0bcc9007_6559	4a9cac2c1a817d9acdec143b653b9a80_6587	ac8fed72b32d7540cf9a1b9ac12df95a_6214	197b0243bc5bc4c380ecfb8919a026b1_6968	79ccbe49faa72747a800162f6a36c0ca_6073	614e29224da4f337b8899b3142d81070_6496	d977e7edc1a56720a787e465ab4ce472_6701	e653c257947c2dd0a414de7cb159ba14_6690	31e4ba73e5ddb8c85dea419204f0df5a_6327	752b3971131f3206662b5e22da3b23aa_6126	83683a6c7ca473684645e0830a47223d_7020	03da1bd30b32560bef8e38ea7761d9fe_6272	c648bd7c3a222aa51bed3e3836bcf8c8_6491	B9T21_08175.p01	B9T15_09305.p01	B9T14_09275.p01	B9T11_09385.p01	B9T12_09100.p01	B9T18_09355.p01	B9T13_09250.p01	F387_01321.p01	A6V30_06150.p01
B143_RS0108135		aminodeoxychorismate/anthranilate synthase component II	26	26	1	1	3017				578	590	585	B9T10_10010.p01	BMY_1351.p01	a04b031c37c06570dd644ef46d09ac8c_6392	2cf5bec40a3ef4476bf46f509f729c16_6497	102e21fe2bbcace64a7555dd0bcc9007_6666	4a9cac2c1a817d9acdec143b653b9a80_6695	ac8fed72b32d7540cf9a1b9ac12df95a_6321	197b0243bc5bc4c380ecfb8919a026b1_6860	79ccbe49faa72747a800162f6a36c0ca_5965	614e29224da4f337b8899b3142d81070_6388	d977e7edc1a56720a787e465ab4ce472_6809	e653c257947c2dd0a414de7cb159ba14_6797	31e4ba73e5ddb8c85dea419204f0df5a_6219	752b3971131f3206662b5e22da3b23aa_6018	83683a6c7ca473684645e0830a47223d_6913	03da1bd30b32560bef8e38ea7761d9fe_6166	c648bd7c3a222aa51bed3e3836bcf8c8_6385	B9T21_08040.p01	B9T15_09170.p01	B9T14_09140.p01	B9T11_09520.p01	B9T12_09235.p01	B9T18_09220.p01	B9T13_09115.p01	F387_01348.p01	A6V30_06015.p01
F387_01009		M15 family metallopeptidase	26	26	1	1	1352				692	698	692	B9T10_00865.p01	BMY_2058.p01	a04b031c37c06570dd644ef46d09ac8c_4800	2cf5bec40a3ef4476bf46f509f729c16_3676	102e21fe2bbcace64a7555dd0bcc9007_3976	4a9cac2c1a817d9acdec143b653b9a80_1972	ac8fed72b32d7540cf9a1b9ac12df95a_4999	197b0243bc5bc4c380ecfb8919a026b1_3479	79ccbe49faa72747a800162f6a36c0ca_5413	614e29224da4f337b8899b3142d81070_5660	d977e7edc1a56720a787e465ab4ce472_5782	e653c257947c2dd0a414de7cb159ba14_5766	31e4ba73e5ddb8c85dea419204f0df5a_4558	752b3971131f3206662b5e22da3b23aa_5790	83683a6c7ca473684645e0830a47223d_5764	03da1bd30b32560bef8e38ea7761d9fe_4064	c648bd7c3a222aa51bed3e3836bcf8c8_3124	B9T21_00860.p01	B9T15_04160.p01	B9T14_00880.p01	B9T11_01865.p01	B9T12_00875.p01	B9T18_04230.p01	B9T13_00880.p01	F387_01009.p01	A6V30_02495.p01
recC		exodeoxyribonuclease V subunit gamma	26	26	1	1	1160				1808	3398	3336	B9T10_00020.p01	BMY_1879.p01	a04b031c37c06570dd644ef46d09ac8c_7672	2cf5bec40a3ef4476bf46f509f729c16_7314	102e21fe2bbcace64a7555dd0bcc9007_7388	4a9cac2c1a817d9acdec143b653b9a80_7165	ac8fed72b32d7540cf9a1b9ac12df95a_7555	197b0243bc5bc4c380ecfb8919a026b1_4142	79ccbe49faa72747a800162f6a36c0ca_7219	614e29224da4f337b8899b3142d81070_7573	d977e7edc1a56720a787e465ab4ce472_7696	e653c257947c2dd0a414de7cb159ba14_7687	31e4ba73e5ddb8c85dea419204f0df5a_7235	752b3971131f3206662b5e22da3b23aa_7099	83683a6c7ca473684645e0830a47223d_7958	03da1bd30b32560bef8e38ea7761d9fe_7439	c648bd7c3a222aa51bed3e3836bcf8c8_6940	B9T21_00020.p01	B9T15_05015.p01	B9T14_00025.p01	B9T11_02720.p01	B9T12_00020.p01	B9T18_05100.p01	B9T13_00025.p01	F387_00839.p01	A6V30_01660.p01
A6V30_01665		anthranilate synthase component 1	26	26	1	1	1161				1499	1688	1558	B9T10_00025.p01	BMY_1881.p01	a04b031c37c06570dd644ef46d09ac8c_7668	2cf5bec40a3ef4476bf46f509f729c16_7318	102e21fe2bbcace64a7555dd0bcc9007_7384	4a9cac2c1a817d9acdec143b653b9a80_7161	ac8fed72b32d7540cf9a1b9ac12df95a_7551	197b0243bc5bc4c380ecfb8919a026b1_4138	79ccbe49faa72747a800162f6a36c0ca_7216	614e29224da4f337b8899b3142d81070_7577	d977e7edc1a56720a787e465ab4ce472_7700	e653c257947c2dd0a414de7cb159ba14_7691	31e4ba73e5ddb8c85dea419204f0df5a_7231	752b3971131f3206662b5e22da3b23aa_7103	83683a6c7ca473684645e0830a47223d_7954	03da1bd30b32560bef8e38ea7761d9fe_7435	c648bd7c3a222aa51bed3e3836bcf8c8_6944	B9T21_00025.p01	B9T15_05010.p01	B9T14_00030.p01	B9T11_02715.p01	B9T12_00025.p01	B9T18_05095.p01	B9T13_00030.p01	F387_00840.p01	A6V30_01665.p01
rpsN		30S ribosomal protein S14	26	26	1	1	3669				305	305	305	B9T10_06225.p01	BMY_1597.p01	a04b031c37c06570dd644ef46d09ac8c_3113	2cf5bec40a3ef4476bf46f509f729c16_2447	102e21fe2bbcace64a7555dd0bcc9007_3001	4a9cac2c1a817d9acdec143b653b9a80_3625	ac8fed72b32d7540cf9a1b9ac12df95a_3955	197b0243bc5bc4c380ecfb8919a026b1_2501	79ccbe49faa72747a800162f6a36c0ca_3725	614e29224da4f337b8899b3142d81070_4278	d977e7edc1a56720a787e465ab4ce472_2499	e653c257947c2dd0a414de7cb159ba14_3334	31e4ba73e5ddb8c85dea419204f0df5a_3547	752b3971131f3206662b5e22da3b23aa_3797	83683a6c7ca473684645e0830a47223d_2809	03da1bd30b32560bef8e38ea7761d9fe_3670	c648bd7c3a222aa51bed3e3836bcf8c8_4349	B9T21_03965.p01	B9T15_06100.p01	B9T14_06070.p01	B9T11_03785.p01	B9T12_06945.p01	B9T18_06465.p01	B9T13_04775.p01	F387_00820.p01	A6V30_08935.p01
rpmA		50S ribosomal protein L27	26	26	1	1	3710				260	260	260	B9T10_06035.p01	BMY_1558.p01	a04b031c37c06570dd644ef46d09ac8c_3266	2cf5bec40a3ef4476bf46f509f729c16_4689	102e21fe2bbcace64a7555dd0bcc9007_5188	4a9cac2c1a817d9acdec143b653b9a80_4519	ac8fed72b32d7540cf9a1b9ac12df95a_6688	197b0243bc5bc4c380ecfb8919a026b1_4918	79ccbe49faa72747a800162f6a36c0ca_5229	614e29224da4f337b8899b3142d81070_4431	d977e7edc1a56720a787e465ab4ce472_5270	e653c257947c2dd0a414de7cb159ba14_4532	31e4ba73e5ddb8c85dea419204f0df5a_7417	752b3971131f3206662b5e22da3b23aa_5299	83683a6c7ca473684645e0830a47223d_5580	03da1bd30b32560bef8e38ea7761d9fe_4562	c648bd7c3a222aa51bed3e3836bcf8c8_4196	B9T21_03775.p01	B9T15_05910.p01	B9T14_05880.p01	B9T11_03975.p01	B9T12_06755.p01	B9T18_06655.p01	B9T13_04530.p01	F387_01506.p01	A6V30_08745.p01
B9T11_04105		roadblock/LC7 domain-containing protein	26	26	1	1	3742				362	362	362	B9T10_05910.p01	BMY_1530.p01	a04b031c37c06570dd644ef46d09ac8c_3370	2cf5bec40a3ef4476bf46f509f729c16_4589	102e21fe2bbcace64a7555dd0bcc9007_5084	4a9cac2c1a817d9acdec143b653b9a80_4623	ac8fed72b32d7540cf9a1b9ac12df95a_6790	197b0243bc5bc4c380ecfb8919a026b1_4814	79ccbe49faa72747a800162f6a36c0ca_5130	614e29224da4f337b8899b3142d81070_4535	d977e7edc1a56720a787e465ab4ce472_5166	e653c257947c2dd0a414de7cb159ba14_4636	31e4ba73e5ddb8c85dea419204f0df5a_7318	752b3971131f3206662b5e22da3b23aa_5195	83683a6c7ca473684645e0830a47223d_5477	03da1bd30b32560bef8e38ea7761d9fe_4666	c648bd7c3a222aa51bed3e3836bcf8c8_4092	B9T21_03650.p01	B9T15_05780.p01	B9T14_05750.p01	B9T11_04105.p01	B9T12_06630.p01	B9T18_06780.p01	B9T13_04400.p01	F387_01478.p01	A6V30_08620.p01
J7561_05055		cbb3-type cytochrome c oxidase subunit 3	26	26	1	1	3556				266	266	266	B9T10_06725.p01	BMY_1700.p01	a04b031c37c06570dd644ef46d09ac8c_2709	2cf5bec40a3ef4476bf46f509f729c16_2775	102e21fe2bbcace64a7555dd0bcc9007_3401	4a9cac2c1a817d9acdec143b653b9a80_4025	ac8fed72b32d7540cf9a1b9ac12df95a_3552	197b0243bc5bc4c380ecfb8919a026b1_2899	79ccbe49faa72747a800162f6a36c0ca_4048	614e29224da4f337b8899b3142d81070_3952	d977e7edc1a56720a787e465ab4ce472_2825	e653c257947c2dd0a414de7cb159ba14_3008	31e4ba73e5ddb8c85dea419204f0df5a_3951	752b3971131f3206662b5e22da3b23aa_4125	83683a6c7ca473684645e0830a47223d_3135	03da1bd30b32560bef8e38ea7761d9fe_3262	c648bd7c3a222aa51bed3e3836bcf8c8_4673	B9T21_04465.p01	B9T15_06600.p01	B9T14_06570.p01	B9T11_03285.p01	B9T12_07350.p01	B9T18_05965.p01	B9T13_05275.p01	F387_00719.p01	A6V30_09435.p01
J7547_09375		cold-shock protein	26	26	1	1	3133				203	203	203	B9T10_09645.p01	BMY_1274.p01	a04b031c37c06570dd644ef46d09ac8c_6683	2cf5bec40a3ef4476bf46f509f729c16_6207	102e21fe2bbcace64a7555dd0bcc9007_7438	4a9cac2c1a817d9acdec143b653b9a80_7431	ac8fed72b32d7540cf9a1b9ac12df95a_6029	197b0243bc5bc4c380ecfb8919a026b1_7442	79ccbe49faa72747a800162f6a36c0ca_6257	614e29224da4f337b8899b3142d81070_6720	d977e7edc1a56720a787e465ab4ce472_6478	e653c257947c2dd0a414de7cb159ba14_6465	31e4ba73e5ddb8c85dea419204f0df5a_6512	752b3971131f3206662b5e22da3b23aa_6311	83683a6c7ca473684645e0830a47223d_7241	03da1bd30b32560bef8e38ea7761d9fe_6457	c648bd7c3a222aa51bed3e3836bcf8c8_6673	B9T21_08405.p01	B9T15_09535.p01	B9T14_09505.p01	B9T11_09155.p01	B9T12_08640.p01	B9T18_09635.p01	B9T13_09480.p01	F387_01275.p01	A6V30_06380.p01
J7558_07895		CopY/TcrY family copper transport repressor	26	26	1	1	2724				446	446	446	B9T10_04910.p01	BMY_0818.p01	a04b031c37c06570dd644ef46d09ac8c_6275	2cf5bec40a3ef4476bf46f509f729c16_5748	102e21fe2bbcace64a7555dd0bcc9007_5265	4a9cac2c1a817d9acdec143b653b9a80_5299	ac8fed72b32d7540cf9a1b9ac12df95a_2161	197b0243bc5bc4c380ecfb8919a026b1_5384	79ccbe49faa72747a800162f6a36c0ca_2556	614e29224da4f337b8899b3142d81070_5877	d977e7edc1a56720a787e465ab4ce472_5998	e653c257947c2dd0a414de7cb159ba14_5983	31e4ba73e5ddb8c85dea419204f0df5a_5559	752b3971131f3206662b5e22da3b23aa_1774	83683a6c7ca473684645e0830a47223d_6688	03da1bd30b32560bef8e38ea7761d9fe_5656	c648bd7c3a222aa51bed3e3836bcf8c8_161	B9T21_07755.p01	B9T15_00205.p01	B9T14_04820.p01	B9T11_06160.p01	B9T12_03515.p01	B9T18_00200.p01	B9T13_08830.p01	F387_01577.p01	A6V30_05735.p01
ruvC		crossover junction endodeoxyribonuclease RuvC	26	26	1	1	451				482	482	482	B9T10_07480.p01	BMY_1836.p01	a04b031c37c06570dd644ef46d09ac8c_7127	2cf5bec40a3ef4476bf46f509f729c16_7190	102e21fe2bbcace64a7555dd0bcc9007_7074	4a9cac2c1a817d9acdec143b653b9a80_7269	ac8fed72b32d7540cf9a1b9ac12df95a_7033	197b0243bc5bc4c380ecfb8919a026b1_7159	79ccbe49faa72747a800162f6a36c0ca_7360	614e29224da4f337b8899b3142d81070_3427	d977e7edc1a56720a787e465ab4ce472_3350	e653c257947c2dd0a414de7cb159ba14_2483	31e4ba73e5ddb8c85dea419204f0df5a_7463	752b3971131f3206662b5e22da3b23aa_6761	83683a6c7ca473684645e0830a47223d_3660	03da1bd30b32560bef8e38ea7761d9fe_7114	c648bd7c3a222aa51bed3e3836bcf8c8_7405	B9T21_09465.p01	B9T15_07320.p01	B9T14_07290.p01	B9T11_09770.p01	B9T12_09475.p01	B9T18_05280.p01	B9T13_05980.p01	F387_01873.p01	A6V30_07585.p01
hisA		1-(5-phosphoribosyl)-5-[(5- phosphoribosylamino)methylideneamino]imidazole-4- carboxamide isomerase	26	26	1	1	1183				734	734	734	B9T10_00125.p01	BMY_1903.p01	a04b031c37c06570dd644ef46d09ac8c_7589	2cf5bec40a3ef4476bf46f509f729c16_7390	102e21fe2bbcace64a7555dd0bcc9007_7308	4a9cac2c1a817d9acdec143b653b9a80_7086	ac8fed72b32d7540cf9a1b9ac12df95a_7472	197b0243bc5bc4c380ecfb8919a026b1_4062	79ccbe49faa72747a800162f6a36c0ca_7143	614e29224da4f337b8899b3142d81070_7653	d977e7edc1a56720a787e465ab4ce472_7774	e653c257947c2dd0a414de7cb159ba14_7766	31e4ba73e5ddb8c85dea419204f0df5a_7155	752b3971131f3206662b5e22da3b23aa_7181	83683a6c7ca473684645e0830a47223d_7879	03da1bd30b32560bef8e38ea7761d9fe_7355	c648bd7c3a222aa51bed3e3836bcf8c8_7024	B9T21_00125.p01	B9T15_04915.p01	B9T14_00125.p01	B9T11_02620.p01	B9T12_00120.p01	B9T18_04995.p01	B9T13_00125.p01	F387_00860.p01	A6V30_01765.p01
rplD		50S ribosomal protein L4	26	26	1	1	3681				605	605	605	B9T10_06165.p01	BMY_1585.p01	a04b031c37c06570dd644ef46d09ac8c_3161	2cf5bec40a3ef4476bf46f509f729c16_2399	102e21fe2bbcace64a7555dd0bcc9007_2953	4a9cac2c1a817d9acdec143b653b9a80_3577	ac8fed72b32d7540cf9a1b9ac12df95a_4003	197b0243bc5bc4c380ecfb8919a026b1_2453	79ccbe49faa72747a800162f6a36c0ca_3677	614e29224da4f337b8899b3142d81070_4326	d977e7edc1a56720a787e465ab4ce472_2451	e653c257947c2dd0a414de7cb159ba14_3382	31e4ba73e5ddb8c85dea419204f0df5a_3499	752b3971131f3206662b5e22da3b23aa_3749	83683a6c7ca473684645e0830a47223d_2761	03da1bd30b32560bef8e38ea7761d9fe_3718	c648bd7c3a222aa51bed3e3836bcf8c8_4301	B9T21_03905.p01	B9T15_06040.p01	B9T14_06010.p01	B9T11_03845.p01	B9T12_06885.p01	B9T18_06525.p01	B9T13_04715.p01	F387_00832.p01	A6V30_08875.p01
J7622_09205		NAD(P) transhydrogenase subunit alpha	26	26	1	1	1063				281	281	281	B9T10_09005.p01	BMY_0931.p01	a04b031c37c06570dd644ef46d09ac8c_6975	2cf5bec40a3ef4476bf46f509f729c16_6814	102e21fe2bbcace64a7555dd0bcc9007_6107	4a9cac2c1a817d9acdec143b653b9a80_3266	ac8fed72b32d7540cf9a1b9ac12df95a_6408	197b0243bc5bc4c380ecfb8919a026b1_6765	79ccbe49faa72747a800162f6a36c0ca_6538	614e29224da4f337b8899b3142d81070_7322	d977e7edc1a56720a787e465ab4ce472_7442	e653c257947c2dd0a414de7cb159ba14_7434	31e4ba73e5ddb8c85dea419204f0df5a_6804	752b3971131f3206662b5e22da3b23aa_6376	83683a6c7ca473684645e0830a47223d_7307	03da1bd30b32560bef8e38ea7761d9fe_6739	c648bd7c3a222aa51bed3e3836bcf8c8_5359	B9T21_06250.p01	B9T15_08770.p01	B9T14_08740.p01	B9T11_06665.p01	B9T12_06165.p01	B9T18_08830.p01	B9T13_07435.p01	F387_00407.p01	A6V30_01310.p01
B9T14_06830		type IV pilus twitching motility protein PilT	26	26	1	1	3501				1037	1037	1037	B9T10_06970.p01	BMY_1752.p01	a04b031c37c06570dd644ef46d09ac8c_2500	2cf5bec40a3ef4476bf46f509f729c16_2972	102e21fe2bbcace64a7555dd0bcc9007_3610	4a9cac2c1a817d9acdec143b653b9a80_4234	ac8fed72b32d7540cf9a1b9ac12df95a_3344	197b0243bc5bc4c380ecfb8919a026b1_3096	79ccbe49faa72747a800162f6a36c0ca_4244	614e29224da4f337b8899b3142d81070_3755	d977e7edc1a56720a787e465ab4ce472_3022	e653c257947c2dd0a414de7cb159ba14_2811	31e4ba73e5ddb8c85dea419204f0df5a_4148	752b3971131f3206662b5e22da3b23aa_4334	83683a6c7ca473684645e0830a47223d_3332	03da1bd30b32560bef8e38ea7761d9fe_3053	c648bd7c3a222aa51bed3e3836bcf8c8_4882	B9T21_04725.p01	B9T15_06860.p01	B9T14_06830.p01	B9T11_03025.p01	B9T12_07595.p01	B9T18_05720.p01	B9T13_05535.p01	F387_00667.p01	A6V30_09680.p01
rpsP		30S ribosomal protein S16	26	26	1	1	460				251	251	251	B9T10_07440.p01	BMY_1828.p01	a04b031c37c06570dd644ef46d09ac8c_7159	2cf5bec40a3ef4476bf46f509f729c16_7222	102e21fe2bbcace64a7555dd0bcc9007_7105	4a9cac2c1a817d9acdec143b653b9a80_7237	ac8fed72b32d7540cf9a1b9ac12df95a_7065	197b0243bc5bc4c380ecfb8919a026b1_7191	79ccbe49faa72747a800162f6a36c0ca_7328	614e29224da4f337b8899b3142d81070_3459	d977e7edc1a56720a787e465ab4ce472_3318	e653c257947c2dd0a414de7cb159ba14_2515	31e4ba73e5ddb8c85dea419204f0df5a_7495	752b3971131f3206662b5e22da3b23aa_6793	83683a6c7ca473684645e0830a47223d_3628	03da1bd30b32560bef8e38ea7761d9fe_7146	c648bd7c3a222aa51bed3e3836bcf8c8_7374	B9T21_09425.p01	B9T15_07280.p01	B9T14_07250.p01	B9T11_09810.p01	B9T12_09515.p01	B9T18_05320.p01	B9T13_05940.p01	F387_01881.p01	A6V30_07625.p01
rplA		50S ribosomal protein L1	26	26	1	1	863				692	692	692	B9T10_08025.p01	BMY_1134.p01	a04b031c37c06570dd644ef46d09ac8c_2068	2cf5bec40a3ef4476bf46f509f729c16_1576	102e21fe2bbcace64a7555dd0bcc9007_2112	4a9cac2c1a817d9acdec143b653b9a80_2483	ac8fed72b32d7540cf9a1b9ac12df95a_2415	197b0243bc5bc4c380ecfb8919a026b1_2111	79ccbe49faa72747a800162f6a36c0ca_2810	614e29224da4f337b8899b3142d81070_3110	d977e7edc1a56720a787e465ab4ce472_4233	e653c257947c2dd0a414de7cb159ba14_4216	31e4ba73e5ddb8c85dea419204f0df5a_3121	752b3971131f3206662b5e22da3b23aa_2920	83683a6c7ca473684645e0830a47223d_4082	03da1bd30b32560bef8e38ea7761d9fe_2112	c648bd7c3a222aa51bed3e3836bcf8c8_6118	B9T21_05280.p01	B9T15_07810.p01	B9T14_07780.p01	B9T11_07625.p01	B9T12_05190.p01	B9T18_07860.p01	B9T13_06475.p01	F387_00604.p01	A6V30_00360.p01
rho		transcription termination factor Rho	26	26	1	1	3106				1256	1256	1256	B9T10_09490.p01	BMY_1243.p01	a04b031c37c06570dd644ef46d09ac8c_7343	2cf5bec40a3ef4476bf46f509f729c16_6709	102e21fe2bbcace64a7555dd0bcc9007_6870	4a9cac2c1a817d9acdec143b653b9a80_6899	ac8fed72b32d7540cf9a1b9ac12df95a_7282	197b0243bc5bc4c380ecfb8919a026b1_6376	79ccbe49faa72747a800162f6a36c0ca_6376	614e29224da4f337b8899b3142d81070_7427	d977e7edc1a56720a787e465ab4ce472_7606	e653c257947c2dd0a414de7cb159ba14_7597	31e4ba73e5ddb8c85dea419204f0df5a_6909	752b3971131f3206662b5e22da3b23aa_6956	83683a6c7ca473684645e0830a47223d_7637	03da1bd30b32560bef8e38ea7761d9fe_6576	c648bd7c3a222aa51bed3e3836bcf8c8_6789	B9T21_08560.p01	B9T15_09690.p01	B9T14_09660.p01	B9T11_09000.p01	B9T12_08795.p01	B9T18_09785.p01	B9T13_09635.p01	F387_01245.p01	A6V30_06530.p01
rpsQ		30S ribosomal protein S17	26	26	1	1	3673				266	266	266	B9T10_06205.p01	BMY_1593.p01	a04b031c37c06570dd644ef46d09ac8c_3129	2cf5bec40a3ef4476bf46f509f729c16_2431	102e21fe2bbcace64a7555dd0bcc9007_2985	4a9cac2c1a817d9acdec143b653b9a80_3609	ac8fed72b32d7540cf9a1b9ac12df95a_3971	197b0243bc5bc4c380ecfb8919a026b1_2485	79ccbe49faa72747a800162f6a36c0ca_3709	614e29224da4f337b8899b3142d81070_4294	d977e7edc1a56720a787e465ab4ce472_2483	e653c257947c2dd0a414de7cb159ba14_3350	31e4ba73e5ddb8c85dea419204f0df5a_3531	752b3971131f3206662b5e22da3b23aa_3781	83683a6c7ca473684645e0830a47223d_2793	03da1bd30b32560bef8e38ea7761d9fe_3686	c648bd7c3a222aa51bed3e3836bcf8c8_4333	B9T21_03945.p01	B9T15_06080.p01	B9T14_06050.p01	B9T11_03805.p01	B9T12_06925.p01	B9T18_06485.p01	B9T13_04755.p01	F387_00824.p01	A6V30_08915.p01
B9T18_08850		DUF882 domain-containing protein	26	26	1	1	1067				656	656	656	B9T10_09025.p01	BMY_0927.p01	a04b031c37c06570dd644ef46d09ac8c_6959	2cf5bec40a3ef4476bf46f509f729c16_6830	102e21fe2bbcace64a7555dd0bcc9007_6123	4a9cac2c1a817d9acdec143b653b9a80_3282	ac8fed72b32d7540cf9a1b9ac12df95a_6424	197b0243bc5bc4c380ecfb8919a026b1_6749	79ccbe49faa72747a800162f6a36c0ca_6554	614e29224da4f337b8899b3142d81070_7306	d977e7edc1a56720a787e465ab4ce472_7426	e653c257947c2dd0a414de7cb159ba14_7419	31e4ba73e5ddb8c85dea419204f0df5a_6788	752b3971131f3206662b5e22da3b23aa_6392	83683a6c7ca473684645e0830a47223d_7323	03da1bd30b32560bef8e38ea7761d9fe_6755	c648bd7c3a222aa51bed3e3836bcf8c8_5343	B9T21_06270.p01	B9T15_08790.p01	B9T14_08760.p01	B9T11_06645.p01	B9T12_06185.p01	B9T18_08850.p01	B9T13_07455.p01	F387_00403.p01	A6V30_01330.p01
B9T21_00780		methylglyoxal synthase	26	26	1	1	1331				395	395	395	B9T10_00785.p01	BMY_2042.p01	a04b031c37c06570dd644ef46d09ac8c_4865	2cf5bec40a3ef4476bf46f509f729c16_3610	102e21fe2bbcace64a7555dd0bcc9007_4046	4a9cac2c1a817d9acdec143b653b9a80_2042	ac8fed72b32d7540cf9a1b9ac12df95a_5069	197b0243bc5bc4c380ecfb8919a026b1_3545	79ccbe49faa72747a800162f6a36c0ca_5483	614e29224da4f337b8899b3142d81070_5590	d977e7edc1a56720a787e465ab4ce472_5712	e653c257947c2dd0a414de7cb159ba14_5696	31e4ba73e5ddb8c85dea419204f0df5a_4624	752b3971131f3206662b5e22da3b23aa_5724	83683a6c7ca473684645e0830a47223d_5834	03da1bd30b32560bef8e38ea7761d9fe_4130	c648bd7c3a222aa51bed3e3836bcf8c8_3190	B9T21_00780.p01	B9T15_04245.p01	B9T14_00795.p01	B9T11_01950.p01	B9T12_00795.p01	B9T18_04320.p01	B9T13_00795.p01	F387_00992.p01	A6V30_02415.p01
dksA		RNA polymerase-binding protein DksA	26	26	1	1	1211				431	431	431	B9T10_00255.p01	BMY_1929.p01	a04b031c37c06570dd644ef46d09ac8c_7482	2cf5bec40a3ef4476bf46f509f729c16_7493	102e21fe2bbcace64a7555dd0bcc9007_7204	4a9cac2c1a817d9acdec143b653b9a80_6982	ac8fed72b32d7540cf9a1b9ac12df95a_7366	197b0243bc5bc4c380ecfb8919a026b1_3954	79ccbe49faa72747a800162f6a36c0ca_7037	614e29224da4f337b8899b3142d81070_7757	d977e7edc1a56720a787e465ab4ce472_7878	e653c257947c2dd0a414de7cb159ba14_7869	31e4ba73e5ddb8c85dea419204f0df5a_7048	752b3971131f3206662b5e22da3b23aa_7285	83683a6c7ca473684645e0830a47223d_7776	03da1bd30b32560bef8e38ea7761d9fe_7249	c648bd7c3a222aa51bed3e3836bcf8c8_7132	B9T21_00260.p01	B9T15_04785.p01	B9T14_00255.p01	B9T11_02490.p01	B9T12_00250.p01	B9T18_04865.p01	B9T13_00255.p01	F387_00886.p01	A6V30_01900.p01
hisC		histidinol-phosphate transaminase	26	26	1	1	1185				1040	1040	1040	B9T10_00135.p01	BMY_1905.p01	a04b031c37c06570dd644ef46d09ac8c_7581	2cf5bec40a3ef4476bf46f509f729c16_7398	102e21fe2bbcace64a7555dd0bcc9007_7300	4a9cac2c1a817d9acdec143b653b9a80_7078	ac8fed72b32d7540cf9a1b9ac12df95a_7464	197b0243bc5bc4c380ecfb8919a026b1_4054	79ccbe49faa72747a800162f6a36c0ca_7135	614e29224da4f337b8899b3142d81070_7661	d977e7edc1a56720a787e465ab4ce472_7782	e653c257947c2dd0a414de7cb159ba14_7774	31e4ba73e5ddb8c85dea419204f0df5a_7147	752b3971131f3206662b5e22da3b23aa_7189	83683a6c7ca473684645e0830a47223d_7871	03da1bd30b32560bef8e38ea7761d9fe_7347	c648bd7c3a222aa51bed3e3836bcf8c8_7032	B9T21_00135.p01	B9T15_04905.p01	B9T14_00135.p01	B9T11_02610.p01	B9T12_00130.p01	B9T18_04985.p01	B9T13_00135.p01	F387_00862.p01	A6V30_01775.p01
J7600_09995		cytochrome c4	26	26	1	1	439				887	887	887	B9T10_07560.p01	BMY_1852.p01	a04b031c37c06570dd644ef46d09ac8c_7067	2cf5bec40a3ef4476bf46f509f729c16_7131	102e21fe2bbcace64a7555dd0bcc9007_7015	4a9cac2c1a817d9acdec143b653b9a80_7327	ac8fed72b32d7540cf9a1b9ac12df95a_6973	197b0243bc5bc4c380ecfb8919a026b1_7100	79ccbe49faa72747a800162f6a36c0ca_7629	614e29224da4f337b8899b3142d81070_7931	d977e7edc1a56720a787e465ab4ce472_3410	e653c257947c2dd0a414de7cb159ba14_2423	31e4ba73e5ddb8c85dea419204f0df5a_7765	752b3971131f3206662b5e22da3b23aa_6702	83683a6c7ca473684645e0830a47223d_3720	03da1bd30b32560bef8e38ea7761d9fe_7054	c648bd7c3a222aa51bed3e3836bcf8c8_7465	B9T21_09545.p01	B9T15_07400.p01	B9T14_07370.p01	B9T11_09690.p01	B9T12_09395.p01	B9T18_05200.p01	B9T13_06060.p01	F387_01857.p01	A6V30_07505.p01
yidD		membrane protein insertion efficiency factor YidD	26	26	1	1	2792				209	209	209	B9T10_04640.p01	BMY_0761.p01	a04b031c37c06570dd644ef46d09ac8c_6068	2cf5bec40a3ef4476bf46f509f729c16_5953	102e21fe2bbcace64a7555dd0bcc9007_5518	4a9cac2c1a817d9acdec143b653b9a80_5553	ac8fed72b32d7540cf9a1b9ac12df95a_1949	197b0243bc5bc4c380ecfb8919a026b1_5126	79ccbe49faa72747a800162f6a36c0ca_2348	614e29224da4f337b8899b3142d81070_6130	d977e7edc1a56720a787e465ab4ce472_6252	e653c257947c2dd0a414de7cb159ba14_6239	31e4ba73e5ddb8c85dea419204f0df5a_5313	752b3971131f3206662b5e22da3b23aa_1982	83683a6c7ca473684645e0830a47223d_6433	03da1bd30b32560bef8e38ea7761d9fe_5449	c648bd7c3a222aa51bed3e3836bcf8c8_373	B9T21_07425.p01	B9T15_00470.p01	B9T14_04560.p01	B9T11_05900.p01	B9T12_03785.p01	B9T18_00470.p01	B9T13_08570.p01	F387_01631.p01	A6V30_05470.p01
rpsE		30S ribosomal protein S5	26	26	1	1	3665				515	515	515	B9T10_06245.p01	BMY_1601.p01	a04b031c37c06570dd644ef46d09ac8c_3097	2cf5bec40a3ef4476bf46f509f729c16_2463	102e21fe2bbcace64a7555dd0bcc9007_3017	4a9cac2c1a817d9acdec143b653b9a80_3641	ac8fed72b32d7540cf9a1b9ac12df95a_3939	197b0243bc5bc4c380ecfb8919a026b1_2517	79ccbe49faa72747a800162f6a36c0ca_3741	614e29224da4f337b8899b3142d81070_4262	d977e7edc1a56720a787e465ab4ce472_2515	e653c257947c2dd0a414de7cb159ba14_3318	31e4ba73e5ddb8c85dea419204f0df5a_3563	752b3971131f3206662b5e22da3b23aa_3813	83683a6c7ca473684645e0830a47223d_2825	03da1bd30b32560bef8e38ea7761d9fe_3654	c648bd7c3a222aa51bed3e3836bcf8c8_4365	B9T21_03985.p01	B9T15_06120.p01	B9T14_06090.p01	B9T11_03765.p01	B9T12_06965.p01	B9T18_06445.p01	B9T13_04795.p01	F387_00816.p01	A6V30_08955.p01
rplF		50S ribosomal protein L6	26	26	1	1	3667				536	536	536	B9T10_06235.p01	BMY_1599.p01	a04b031c37c06570dd644ef46d09ac8c_3105	2cf5bec40a3ef4476bf46f509f729c16_2455	102e21fe2bbcace64a7555dd0bcc9007_3009	4a9cac2c1a817d9acdec143b653b9a80_3633	ac8fed72b32d7540cf9a1b9ac12df95a_3947	197b0243bc5bc4c380ecfb8919a026b1_2509	79ccbe49faa72747a800162f6a36c0ca_3733	614e29224da4f337b8899b3142d81070_4270	d977e7edc1a56720a787e465ab4ce472_2507	e653c257947c2dd0a414de7cb159ba14_3326	31e4ba73e5ddb8c85dea419204f0df5a_3555	752b3971131f3206662b5e22da3b23aa_3805	83683a6c7ca473684645e0830a47223d_2817	03da1bd30b32560bef8e38ea7761d9fe_3662	c648bd7c3a222aa51bed3e3836bcf8c8_4357	B9T21_03975.p01	B9T15_06110.p01	B9T14_06080.p01	B9T11_03775.p01	B9T12_06955.p01	B9T18_06455.p01	B9T13_04785.p01	F387_00818.p01	A6V30_08945.p01
B9T21_08235		response regulator	26	26	1	1	3057				359	359	359	B9T10_09815.p01	BMY_1311.p01	a04b031c37c06570dd644ef46d09ac8c_6546	2cf5bec40a3ef4476bf46f509f729c16_6343	102e21fe2bbcace64a7555dd0bcc9007_6512	4a9cac2c1a817d9acdec143b653b9a80_6541	ac8fed72b32d7540cf9a1b9ac12df95a_6166	197b0243bc5bc4c380ecfb8919a026b1_7016	79ccbe49faa72747a800162f6a36c0ca_6121	614e29224da4f337b8899b3142d81070_6544	d977e7edc1a56720a787e465ab4ce472_6654	e653c257947c2dd0a414de7cb159ba14_6642	31e4ba73e5ddb8c85dea419204f0df5a_6375	752b3971131f3206662b5e22da3b23aa_6174	83683a6c7ca473684645e0830a47223d_7068	03da1bd30b32560bef8e38ea7761d9fe_6320	c648bd7c3a222aa51bed3e3836bcf8c8_6539	B9T21_08235.p01	B9T15_09365.p01	B9T14_09335.p01	B9T11_09325.p01	B9T12_09040.p01	B9T18_09415.p01	B9T13_09310.p01	F387_01309.p01	A6V30_06210.p01
J7553_07145		peroxiredoxin	26	26	1	1	260				575	575	575	B9T10_05510.p01	BMY_1456.p01	a04b031c37c06570dd644ef46d09ac8c_3660	2cf5bec40a3ef4476bf46f509f729c16_4316	102e21fe2bbcace64a7555dd0bcc9007_4785	4a9cac2c1a817d9acdec143b653b9a80_4922	ac8fed72b32d7540cf9a1b9ac12df95a_5674	197b0243bc5bc4c380ecfb8919a026b1_4512	79ccbe49faa72747a800162f6a36c0ca_4779	614e29224da4f337b8899b3142d81070_4865	d977e7edc1a56720a787e465ab4ce472_4835	e653c257947c2dd0a414de7cb159ba14_4966	31e4ba73e5ddb8c85dea419204f0df5a_5930	752b3971131f3206662b5e22da3b23aa_4860	83683a6c7ca473684645e0830a47223d_5146	03da1bd30b32560bef8e38ea7761d9fe_4940	c648bd7c3a222aa51bed3e3836bcf8c8_3777	B9T21_03280.p01	B9T15_05435.p01	B9T14_05420.p01	B9T11_04445.p01	B9T12_08235.p01	B9T18_07150.p01	B9T13_04010.p01	F387_01409.p01	A6V30_08135.p01
J7553_08565		hypothetical protein	26	26	1	1	3744				530	530	530	B9T10_05900.p01	BMY_1528.p01	a04b031c37c06570dd644ef46d09ac8c_3378	2cf5bec40a3ef4476bf46f509f729c16_4581	102e21fe2bbcace64a7555dd0bcc9007_5076	4a9cac2c1a817d9acdec143b653b9a80_4631	ac8fed72b32d7540cf9a1b9ac12df95a_6798	197b0243bc5bc4c380ecfb8919a026b1_4806	79ccbe49faa72747a800162f6a36c0ca_5122	614e29224da4f337b8899b3142d81070_4543	d977e7edc1a56720a787e465ab4ce472_5158	e653c257947c2dd0a414de7cb159ba14_4643	31e4ba73e5ddb8c85dea419204f0df5a_7310	752b3971131f3206662b5e22da3b23aa_5187	83683a6c7ca473684645e0830a47223d_5469	03da1bd30b32560bef8e38ea7761d9fe_4674	c648bd7c3a222aa51bed3e3836bcf8c8_4084	B9T21_03640.p01	B9T15_05770.p01	B9T14_05740.p01	B9T11_04115.p01	B9T12_06620.p01	B9T18_06790.p01	B9T13_04390.p01	F387_01476.p01	A6V30_08610.p01
rpoA		DNA-directed RNA polymerase subunit alpha	26	26	1	1	3657				998	998	998	B9T10_06285.p01	BMY_1607.p01	a04b031c37c06570dd644ef46d09ac8c_3065	2cf5bec40a3ef4476bf46f509f729c16_2495	102e21fe2bbcace64a7555dd0bcc9007_3049	4a9cac2c1a817d9acdec143b653b9a80_3673	ac8fed72b32d7540cf9a1b9ac12df95a_3907	197b0243bc5bc4c380ecfb8919a026b1_2549	79ccbe49faa72747a800162f6a36c0ca_3773	614e29224da4f337b8899b3142d81070_4230	d977e7edc1a56720a787e465ab4ce472_2547	e653c257947c2dd0a414de7cb159ba14_3286	31e4ba73e5ddb8c85dea419204f0df5a_3595	752b3971131f3206662b5e22da3b23aa_3845	83683a6c7ca473684645e0830a47223d_2857	03da1bd30b32560bef8e38ea7761d9fe_3622	c648bd7c3a222aa51bed3e3836bcf8c8_4397	B9T21_04025.p01	B9T15_06160.p01	B9T14_06130.p01	B9T11_03725.p01	B9T12_07005.p01	B9T18_06405.p01	B9T13_04835.p01	F387_00809.p01	A6V30_08990.p01
rplS		50S ribosomal protein L19	26	26	1	1	1071				356	356	356	B9T10_09045.p01	BMY_0923.p01	a04b031c37c06570dd644ef46d09ac8c_6943	2cf5bec40a3ef4476bf46f509f729c16_6846	102e21fe2bbcace64a7555dd0bcc9007_6139	4a9cac2c1a817d9acdec143b653b9a80_3298	ac8fed72b32d7540cf9a1b9ac12df95a_6440	197b0243bc5bc4c380ecfb8919a026b1_6733	79ccbe49faa72747a800162f6a36c0ca_6570	614e29224da4f337b8899b3142d81070_7290	d977e7edc1a56720a787e465ab4ce472_7410	e653c257947c2dd0a414de7cb159ba14_7403	31e4ba73e5ddb8c85dea419204f0df5a_6772	752b3971131f3206662b5e22da3b23aa_6408	83683a6c7ca473684645e0830a47223d_7338	03da1bd30b32560bef8e38ea7761d9fe_6771	c648bd7c3a222aa51bed3e3836bcf8c8_5327	B9T21_06290.p01	B9T15_08810.p01	B9T14_08780.p01	B9T11_06625.p01	B9T12_06205.p01	B9T18_08870.p01	B9T13_07475.p01	F387_00399.p01	A6V30_01350.p01
B143_RS0107190		LysR family transcriptional regulator	26	26	1	1	986				914	914	914	B9T10_08610.p01	BMY_1012.p01	a04b031c37c06570dd644ef46d09ac8c_1598	2cf5bec40a3ef4476bf46f509f729c16_2044	102e21fe2bbcace64a7555dd0bcc9007_2586	4a9cac2c1a817d9acdec143b653b9a80_2957	ac8fed72b32d7540cf9a1b9ac12df95a_2885	197b0243bc5bc4c380ecfb8919a026b1_1641	79ccbe49faa72747a800162f6a36c0ca_3282	614e29224da4f337b8899b3142d81070_2640	d977e7edc1a56720a787e465ab4ce472_3763	e653c257947c2dd0a414de7cb159ba14_3746	31e4ba73e5ddb8c85dea419204f0df5a_2651	752b3971131f3206662b5e22da3b23aa_3394	83683a6c7ca473684645e0830a47223d_4552	03da1bd30b32560bef8e38ea7761d9fe_2582	c648bd7c3a222aa51bed3e3836bcf8c8_5652	B9T21_05865.p01	B9T15_08395.p01	B9T14_08365.p01	B9T11_07040.p01	B9T12_05775.p01	B9T18_08450.p01	B9T13_07060.p01	F387_00482.p01	A6V30_00940.p01
mraZ		division/cell wall cluster transcriptional repressor MraZ	26	26	1	1	1228				497	497	497	B9T10_00365.p01	BMY_1952.p01	a04b031c37c06570dd644ef46d09ac8c_5191	2cf5bec40a3ef4476bf46f509f729c16_3273	102e21fe2bbcace64a7555dd0bcc9007_4390	4a9cac2c1a817d9acdec143b653b9a80_2387	ac8fed72b32d7540cf9a1b9ac12df95a_5397	197b0243bc5bc4c380ecfb8919a026b1_3874	79ccbe49faa72747a800162f6a36c0ca_5834	614e29224da4f337b8899b3142d81070_5247	d977e7edc1a56720a787e465ab4ce472_5368	e653c257947c2dd0a414de7cb159ba14_5351	31e4ba73e5ddb8c85dea419204f0df5a_5048	752b3971131f3206662b5e22da3b23aa_5395	83683a6c7ca473684645e0830a47223d_6179	03da1bd30b32560bef8e38ea7761d9fe_4466	c648bd7c3a222aa51bed3e3836bcf8c8_7212	B9T21_00370.p01	B9T15_04675.p01	B9T14_00365.p01	B9T11_02380.p01	B9T12_00355.p01	B9T18_04760.p01	B9T13_00365.p01	F387_00908.p01	A6V30_02005.p01
rplP		50S ribosomal protein L16	26	26	1	1	3675				413	413	413	B9T10_06195.p01	BMY_1591.p01	a04b031c37c06570dd644ef46d09ac8c_3137	2cf5bec40a3ef4476bf46f509f729c16_2423	102e21fe2bbcace64a7555dd0bcc9007_2977	4a9cac2c1a817d9acdec143b653b9a80_3601	ac8fed72b32d7540cf9a1b9ac12df95a_3979	197b0243bc5bc4c380ecfb8919a026b1_2477	79ccbe49faa72747a800162f6a36c0ca_3701	614e29224da4f337b8899b3142d81070_4302	d977e7edc1a56720a787e465ab4ce472_2475	e653c257947c2dd0a414de7cb159ba14_3358	31e4ba73e5ddb8c85dea419204f0df5a_3523	752b3971131f3206662b5e22da3b23aa_3773	83683a6c7ca473684645e0830a47223d_2785	03da1bd30b32560bef8e38ea7761d9fe_3694	c648bd7c3a222aa51bed3e3836bcf8c8_4325	B9T21_03935.p01	B9T15_06070.p01	B9T14_06040.p01	B9T11_03815.p01	B9T12_06915.p01	B9T18_06495.p01	B9T13_04745.p01	F387_00826.p01	A6V30_08905.p01
mlaE		lipid asymmetry maintenance ABC transporter permease subunit MlaE	26	26	1	1	1217				776	776	776	B9T10_00305.p01	BMY_1940.p01	a04b031c37c06570dd644ef46d09ac8c_5235	2cf5bec40a3ef4476bf46f509f729c16_3229	102e21fe2bbcace64a7555dd0bcc9007_4434	4a9cac2c1a817d9acdec143b653b9a80_2431	ac8fed72b32d7540cf9a1b9ac12df95a_5441	197b0243bc5bc4c380ecfb8919a026b1_3918	79ccbe49faa72747a800162f6a36c0ca_5878	614e29224da4f337b8899b3142d81070_5203	d977e7edc1a56720a787e465ab4ce472_5324	e653c257947c2dd0a414de7cb159ba14_5307	31e4ba73e5ddb8c85dea419204f0df5a_5092	752b3971131f3206662b5e22da3b23aa_5351	83683a6c7ca473684645e0830a47223d_6223	03da1bd30b32560bef8e38ea7761d9fe_4510	c648bd7c3a222aa51bed3e3836bcf8c8_7168	B9T21_00310.p01	B9T15_04735.p01	B9T14_00305.p01	B9T11_02440.p01	B9T12_00300.p01	B9T18_04815.p01	B9T13_00305.p01	F387_00896.p01	A6V30_01950.p01
accC		acetyl-CoA carboxylase biotin carboxylase subunit	26	26	1	1	2816				1346	1346	1346	B9T10_04520.p01	BMY_0736.p01	a04b031c37c06570dd644ef46d09ac8c_5972	2cf5bec40a3ef4476bf46f509f729c16_6049	102e21fe2bbcace64a7555dd0bcc9007_5613	4a9cac2c1a817d9acdec143b653b9a80_5649	ac8fed72b32d7540cf9a1b9ac12df95a_1853	197b0243bc5bc4c380ecfb8919a026b1_5032	79ccbe49faa72747a800162f6a36c0ca_2248	614e29224da4f337b8899b3142d81070_6226	d977e7edc1a56720a787e465ab4ce472_6348	e653c257947c2dd0a414de7cb159ba14_6335	31e4ba73e5ddb8c85dea419204f0df5a_5217	752b3971131f3206662b5e22da3b23aa_2078	83683a6c7ca473684645e0830a47223d_6337	03da1bd30b32560bef8e38ea7761d9fe_5353	c648bd7c3a222aa51bed3e3836bcf8c8_469	B9T21_07300.p01	B9T15_00590.p01	B9T14_04440.p01	B9T11_05780.p01	B9T12_03905.p01	B9T18_00590.p01	B9T13_08450.p01	F387_01655.p01	A6V30_05345.p01
rpsC		30S ribosomal protein S3	26	26	1	1	3676				689	689	689	B9T10_06190.p01	BMY_1590.p01	a04b031c37c06570dd644ef46d09ac8c_3141	2cf5bec40a3ef4476bf46f509f729c16_2419	102e21fe2bbcace64a7555dd0bcc9007_2973	4a9cac2c1a817d9acdec143b653b9a80_3597	ac8fed72b32d7540cf9a1b9ac12df95a_3983	197b0243bc5bc4c380ecfb8919a026b1_2473	79ccbe49faa72747a800162f6a36c0ca_3697	614e29224da4f337b8899b3142d81070_4306	d977e7edc1a56720a787e465ab4ce472_2471	e653c257947c2dd0a414de7cb159ba14_3362	31e4ba73e5ddb8c85dea419204f0df5a_3519	752b3971131f3206662b5e22da3b23aa_3769	83683a6c7ca473684645e0830a47223d_2781	03da1bd30b32560bef8e38ea7761d9fe_3698	c648bd7c3a222aa51bed3e3836bcf8c8_4321	B9T21_03930.p01	B9T15_06065.p01	B9T14_06035.p01	B9T11_03820.p01	B9T12_06910.p01	B9T18_06500.p01	B9T13_04740.p01	F387_00827.p01	A6V30_08900.p01
pckA		phosphoenolpyruvate carboxykinase (ATP)	26	26	1	1	1083				1613	1613	1613	B9T10_09105.p01	BMY_0911.p01	a04b031c37c06570dd644ef46d09ac8c_6895	2cf5bec40a3ef4476bf46f509f729c16_6894	102e21fe2bbcace64a7555dd0bcc9007_6187	4a9cac2c1a817d9acdec143b653b9a80_3346	ac8fed72b32d7540cf9a1b9ac12df95a_6487	197b0243bc5bc4c380ecfb8919a026b1_6686	79ccbe49faa72747a800162f6a36c0ca_6618	614e29224da4f337b8899b3142d81070_7243	d977e7edc1a56720a787e465ab4ce472_7362	e653c257947c2dd0a414de7cb159ba14_7355	31e4ba73e5ddb8c85dea419204f0df5a_6724	752b3971131f3206662b5e22da3b23aa_6456	83683a6c7ca473684645e0830a47223d_7385	03da1bd30b32560bef8e38ea7761d9fe_6818	c648bd7c3a222aa51bed3e3836bcf8c8_5279	B9T21_06350.p01	B9T15_08870.p01	B9T14_08840.p01	B9T11_06565.p01	B9T12_06265.p01	B9T18_08930.p01	B9T13_07535.p01	F387_00387.p01	A6V30_01410.p01
rplO		50S ribosomal protein L15	26	26	1	1	3663				434	434	434	B9T10_06255.p01	BMY_1603.p01	a04b031c37c06570dd644ef46d09ac8c_3089	2cf5bec40a3ef4476bf46f509f729c16_2471	102e21fe2bbcace64a7555dd0bcc9007_3025	4a9cac2c1a817d9acdec143b653b9a80_3649	ac8fed72b32d7540cf9a1b9ac12df95a_3931	197b0243bc5bc4c380ecfb8919a026b1_2525	79ccbe49faa72747a800162f6a36c0ca_3749	614e29224da4f337b8899b3142d81070_4254	d977e7edc1a56720a787e465ab4ce472_2523	e653c257947c2dd0a414de7cb159ba14_3310	31e4ba73e5ddb8c85dea419204f0df5a_3571	752b3971131f3206662b5e22da3b23aa_3821	83683a6c7ca473684645e0830a47223d_2833	03da1bd30b32560bef8e38ea7761d9fe_3646	c648bd7c3a222aa51bed3e3836bcf8c8_4373	B9T21_03995.p01	B9T15_06130.p01	B9T14_06100.p01	B9T11_03755.p01	B9T12_06975.p01	B9T18_06435.p01	B9T13_04805.p01	F387_00814.p01	A6V30_08965.p01
J7558_06300		YfhL family 4Fe-4S dicluster ferredoxin	26	26	1	1	1293				251	251	251	B9T10_00595.p01	BMY_1999.p01	a04b031c37c06570dd644ef46d09ac8c_5015	2cf5bec40a3ef4476bf46f509f729c16_3458	102e21fe2bbcace64a7555dd0bcc9007_4213	4a9cac2c1a817d9acdec143b653b9a80_2210	ac8fed72b32d7540cf9a1b9ac12df95a_5220	197b0243bc5bc4c380ecfb8919a026b1_3697	79ccbe49faa72747a800162f6a36c0ca_5635	614e29224da4f337b8899b3142d81070_5423	d977e7edc1a56720a787e465ab4ce472_5545	e653c257947c2dd0a414de7cb159ba14_5528	31e4ba73e5ddb8c85dea419204f0df5a_4872	752b3971131f3206662b5e22da3b23aa_5572	83683a6c7ca473684645e0830a47223d_6002	03da1bd30b32560bef8e38ea7761d9fe_4281	c648bd7c3a222aa51bed3e3836bcf8c8_3342	B9T21_00590.p01	B9T15_04455.p01	B9T14_00585.p01	B9T11_02160.p01	B9T12_00605.p01	B9T18_04510.p01	B9T13_00585.p01	F387_00954.p01	A6V30_02225.p01
nuoK		NADH-quinone oxidoreductase subunit NuoK	26	26	1	1	3024				332	332	332	B9T10_09975.p01	BMY_1344.p01	a04b031c37c06570dd644ef46d09ac8c_6419	2cf5bec40a3ef4476bf46f509f729c16_6470	102e21fe2bbcace64a7555dd0bcc9007_6638	4a9cac2c1a817d9acdec143b653b9a80_6667	ac8fed72b32d7540cf9a1b9ac12df95a_6293	197b0243bc5bc4c380ecfb8919a026b1_6888	79ccbe49faa72747a800162f6a36c0ca_5993	614e29224da4f337b8899b3142d81070_6416	d977e7edc1a56720a787e465ab4ce472_6781	e653c257947c2dd0a414de7cb159ba14_6769	31e4ba73e5ddb8c85dea419204f0df5a_6247	752b3971131f3206662b5e22da3b23aa_6046	83683a6c7ca473684645e0830a47223d_6941	03da1bd30b32560bef8e38ea7761d9fe_6194	c648bd7c3a222aa51bed3e3836bcf8c8_6413	B9T21_08075.p01	B9T15_09205.p01	B9T14_09175.p01	B9T11_09485.p01	B9T12_09200.p01	B9T18_09255.p01	B9T13_09150.p01	F387_01341.p01	A6V30_06050.p01
metC		cystathionine beta-lyase	26	26	1	1	1250				527	1151	1127	B9T10_00440.p01	BMY_1967.p01	a04b031c37c06570dd644ef46d09ac8c_5131	2cf5bec40a3ef4476bf46f509f729c16_3333	102e21fe2bbcace64a7555dd0bcc9007_4330	4a9cac2c1a817d9acdec143b653b9a80_2327	ac8fed72b32d7540cf9a1b9ac12df95a_5337	197b0243bc5bc4c380ecfb8919a026b1_3814	79ccbe49faa72747a800162f6a36c0ca_5774	614e29224da4f337b8899b3142d81070_5307	d977e7edc1a56720a787e465ab4ce472_5428	e653c257947c2dd0a414de7cb159ba14_5411	31e4ba73e5ddb8c85dea419204f0df5a_4988	752b3971131f3206662b5e22da3b23aa_5455	83683a6c7ca473684645e0830a47223d_6119	03da1bd30b32560bef8e38ea7761d9fe_4406	c648bd7c3a222aa51bed3e3836bcf8c8_7272	B9T21_00445.p01	B9T15_04600.p01	B9T14_00440.p01	B9T11_02305.p01	B9T12_00430.p01	B9T18_04685.p01	B9T13_00440.p01	F387_00925.p01	A6V30_02080.p01
rpmG		50S ribosomal protein L33	26	26	1	1	3503				167	167	167	B9T10_06960.p01	BMY_1750.p01	a04b031c37c06570dd644ef46d09ac8c_2508	2cf5bec40a3ef4476bf46f509f729c16_2964	102e21fe2bbcace64a7555dd0bcc9007_3602	4a9cac2c1a817d9acdec143b653b9a80_4226	ac8fed72b32d7540cf9a1b9ac12df95a_3352	197b0243bc5bc4c380ecfb8919a026b1_3088	79ccbe49faa72747a800162f6a36c0ca_4236	614e29224da4f337b8899b3142d81070_3763	d977e7edc1a56720a787e465ab4ce472_3014	e653c257947c2dd0a414de7cb159ba14_2819	31e4ba73e5ddb8c85dea419204f0df5a_4140	752b3971131f3206662b5e22da3b23aa_4326	83683a6c7ca473684645e0830a47223d_3324	03da1bd30b32560bef8e38ea7761d9fe_3061	c648bd7c3a222aa51bed3e3836bcf8c8_4874	B9T21_04715.p01	B9T15_06850.p01	B9T14_06820.p01	B9T11_03035.p01	B9T12_07585.p01	B9T18_05730.p01	B9T13_05525.p01	F387_00669.p01	A6V30_09670.p01
B9T10_09945		NAD(P)H-dependent oxidoreductase subunit E	26	26	1	1	3031				515	515	515	B9T10_09945.p01	BMY_1338.p01	a04b031c37c06570dd644ef46d09ac8c_6443	2cf5bec40a3ef4476bf46f509f729c16_6446	102e21fe2bbcace64a7555dd0bcc9007_6614	4a9cac2c1a817d9acdec143b653b9a80_6643	ac8fed72b32d7540cf9a1b9ac12df95a_6270	197b0243bc5bc4c380ecfb8919a026b1_6912	79ccbe49faa72747a800162f6a36c0ca_6017	614e29224da4f337b8899b3142d81070_6440	d977e7edc1a56720a787e465ab4ce472_6757	e653c257947c2dd0a414de7cb159ba14_6745	31e4ba73e5ddb8c85dea419204f0df5a_6271	752b3971131f3206662b5e22da3b23aa_6070	83683a6c7ca473684645e0830a47223d_6964	03da1bd30b32560bef8e38ea7761d9fe_6218	c648bd7c3a222aa51bed3e3836bcf8c8_6437	B9T21_08105.p01	B9T15_09235.p01	B9T14_09205.p01	B9T11_09455.p01	B9T12_09170.p01	B9T18_09285.p01	B9T13_09180.p01	F387_01335.p01	A6V30_06080.p01
J7554_09665		BolA/IbaG family iron-sulfur metabolism protein	26	26	1	1	432				251	251	251	B9T10_07595.p01	BMY_1859.p01	a04b031c37c06570dd644ef46d09ac8c_7039	2cf5bec40a3ef4476bf46f509f729c16_7103	102e21fe2bbcace64a7555dd0bcc9007_6988	4a9cac2c1a817d9acdec143b653b9a80_7355	ac8fed72b32d7540cf9a1b9ac12df95a_6946	197b0243bc5bc4c380ecfb8919a026b1_7072	79ccbe49faa72747a800162f6a36c0ca_7657	614e29224da4f337b8899b3142d81070_7903	d977e7edc1a56720a787e465ab4ce472_3438	e653c257947c2dd0a414de7cb159ba14_2395	31e4ba73e5ddb8c85dea419204f0df5a_7737	752b3971131f3206662b5e22da3b23aa_6674	83683a6c7ca473684645e0830a47223d_3748	03da1bd30b32560bef8e38ea7761d9fe_7028	c648bd7c3a222aa51bed3e3836bcf8c8_7493	B9T21_09580.p01	B9T15_07435.p01	B9T14_07405.p01	B9T11_09655.p01	B9T12_09360.p01	B9T18_05165.p01	B9T13_06095.p01	F387_01850.p01	A6V30_07470.p01
J7606_05810		hypothetical protein	26	26	1	1	3732				179	179	179	B9T10_05945.p01	BMY_1539.p01	a04b031c37c06570dd644ef46d09ac8c_3342	2cf5bec40a3ef4476bf46f509f729c16_4617	102e21fe2bbcace64a7555dd0bcc9007_5112	4a9cac2c1a817d9acdec143b653b9a80_4595	ac8fed72b32d7540cf9a1b9ac12df95a_6762	197b0243bc5bc4c380ecfb8919a026b1_4842	79ccbe49faa72747a800162f6a36c0ca_5158	614e29224da4f337b8899b3142d81070_4507	d977e7edc1a56720a787e465ab4ce472_5194	e653c257947c2dd0a414de7cb159ba14_4608	31e4ba73e5ddb8c85dea419204f0df5a_7345	752b3971131f3206662b5e22da3b23aa_5223	83683a6c7ca473684645e0830a47223d_5505	03da1bd30b32560bef8e38ea7761d9fe_4638	c648bd7c3a222aa51bed3e3836bcf8c8_4120	B9T21_03685.p01	B9T15_05815.p01	B9T14_05785.p01	B9T11_04070.p01	B9T12_06665.p01	B9T18_06745.p01	B9T13_04435.p01	F387_01485.p01	A6V30_08655.p01
rpsM		30S ribosomal protein S13	26	26	1	1	3660				356	356	356	B9T10_06270.p01	BMY_1605.p01	a04b031c37c06570dd644ef46d09ac8c_3077	2cf5bec40a3ef4476bf46f509f729c16_2483	102e21fe2bbcace64a7555dd0bcc9007_3037	4a9cac2c1a817d9acdec143b653b9a80_3661	ac8fed72b32d7540cf9a1b9ac12df95a_3919	197b0243bc5bc4c380ecfb8919a026b1_2537	79ccbe49faa72747a800162f6a36c0ca_3761	614e29224da4f337b8899b3142d81070_4242	d977e7edc1a56720a787e465ab4ce472_2535	e653c257947c2dd0a414de7cb159ba14_3298	31e4ba73e5ddb8c85dea419204f0df5a_3583	752b3971131f3206662b5e22da3b23aa_3833	83683a6c7ca473684645e0830a47223d_2845	03da1bd30b32560bef8e38ea7761d9fe_3634	c648bd7c3a222aa51bed3e3836bcf8c8_4385	B9T21_04010.p01	B9T15_06145.p01	B9T14_06115.p01	B9T11_03740.p01	B9T12_06990.p01	B9T18_06420.p01	B9T13_04820.p01	F387_00812.p01	A6V30_08975.p01
gatC		Asp-tRNA(Asn)/Glu-tRNA(Gln) amidotransferase subunit GatC	26	26	1	1	3549				290	290	290	B9T10_06755.p01	BMY_1707.p01	a04b031c37c06570dd644ef46d09ac8c_2685	2cf5bec40a3ef4476bf46f509f729c16_2799	102e21fe2bbcace64a7555dd0bcc9007_3425	4a9cac2c1a817d9acdec143b653b9a80_4049	ac8fed72b32d7540cf9a1b9ac12df95a_3528	197b0243bc5bc4c380ecfb8919a026b1_2923	79ccbe49faa72747a800162f6a36c0ca_4072	614e29224da4f337b8899b3142d81070_3928	d977e7edc1a56720a787e465ab4ce472_2849	e653c257947c2dd0a414de7cb159ba14_2984	31e4ba73e5ddb8c85dea419204f0df5a_3975	752b3971131f3206662b5e22da3b23aa_4149	83683a6c7ca473684645e0830a47223d_3159	03da1bd30b32560bef8e38ea7761d9fe_3238	c648bd7c3a222aa51bed3e3836bcf8c8_4697	B9T21_04495.p01	B9T15_06630.p01	B9T14_06600.p01	B9T11_03255.p01	B9T12_07380.p01	B9T18_05935.p01	B9T13_05305.p01	F387_00713.p01	A6V30_09465.p01
fbaA		class II fructose-bisphosphate aldolase	26	26	1	1	3077				1076	1076	1076	B9T10_09365.p01	BMY_1215.p01	a04b031c37c06570dd644ef46d09ac8c_7439	2cf5bec40a3ef4476bf46f509f729c16_6609	102e21fe2bbcace64a7555dd0bcc9007_6766	4a9cac2c1a817d9acdec143b653b9a80_6795	ac8fed72b32d7540cf9a1b9ac12df95a_7188	197b0243bc5bc4c380ecfb8919a026b1_6476	79ccbe49faa72747a800162f6a36c0ca_6474	614e29224da4f337b8899b3142d81070_7521	d977e7edc1a56720a787e465ab4ce472_7510	e653c257947c2dd0a414de7cb159ba14_7502	31e4ba73e5ddb8c85dea419204f0df5a_7005	752b3971131f3206662b5e22da3b23aa_7052	83683a6c7ca473684645e0830a47223d_7733	03da1bd30b32560bef8e38ea7761d9fe_6676	c648bd7c3a222aa51bed3e3836bcf8c8_6889	B9T21_08695.p01	B9T15_09815.p01	B9T14_09785.p01	B9T11_08875.p01	B9T12_08920.p01	B9T18_09915.p01	B9T13_09765.p01	F387_01220.p01	A6V30_06665.p01
rpsJ		30S ribosomal protein S10	26	26	1	1	3684				311	311	311	B9T10_06155.p01	BMY_1583.p01	a04b031c37c06570dd644ef46d09ac8c_3169	2cf5bec40a3ef4476bf46f509f729c16_2391	102e21fe2bbcace64a7555dd0bcc9007_2945	4a9cac2c1a817d9acdec143b653b9a80_3569	ac8fed72b32d7540cf9a1b9ac12df95a_4011	197b0243bc5bc4c380ecfb8919a026b1_2445	79ccbe49faa72747a800162f6a36c0ca_3669	614e29224da4f337b8899b3142d81070_4334	d977e7edc1a56720a787e465ab4ce472_2443	e653c257947c2dd0a414de7cb159ba14_3390	31e4ba73e5ddb8c85dea419204f0df5a_3491	752b3971131f3206662b5e22da3b23aa_3741	83683a6c7ca473684645e0830a47223d_2753	03da1bd30b32560bef8e38ea7761d9fe_3726	c648bd7c3a222aa51bed3e3836bcf8c8_4293	B9T21_03895.p01	B9T15_06030.p01	B9T14_06000.p01	B9T11_03855.p01	B9T12_06875.p01	B9T18_06535.p01	B9T13_04705.p01	F387_00834.p01	A6V30_08865.p01
J7554_08155		hypothetical protein	26	26	1	1	3075				260	260	260	B9T10_09355.p01	BMY_1213.p01	a04b031c37c06570dd644ef46d09ac8c_7447	2cf5bec40a3ef4476bf46f509f729c16_6601	102e21fe2bbcace64a7555dd0bcc9007_6758	4a9cac2c1a817d9acdec143b653b9a80_6787	ac8fed72b32d7540cf9a1b9ac12df95a_7180	197b0243bc5bc4c380ecfb8919a026b1_6484	79ccbe49faa72747a800162f6a36c0ca_6482	614e29224da4f337b8899b3142d81070_7529	d977e7edc1a56720a787e465ab4ce472_7502	e653c257947c2dd0a414de7cb159ba14_7494	31e4ba73e5ddb8c85dea419204f0df5a_7013	752b3971131f3206662b5e22da3b23aa_7060	83683a6c7ca473684645e0830a47223d_7741	03da1bd30b32560bef8e38ea7761d9fe_6684	c648bd7c3a222aa51bed3e3836bcf8c8_6897	B9T21_08705.p01	B9T15_09825.p01	B9T14_09795.p01	B9T11_08865.p01	B9T12_08930.p01	B9T18_09925.p01	B9T13_09775.p01	F387_01218.p01	A6V30_06675.p01
rplT		50S ribosomal protein L20	26	26	1	1	1040				356	356	356	B9T10_08875.p01	BMY_0958.p01	a04b031c37c06570dd644ef46d09ac8c_1402	2cf5bec40a3ef4476bf46f509f729c16_2240	102e21fe2bbcace64a7555dd0bcc9007_2794	4a9cac2c1a817d9acdec143b653b9a80_3165	ac8fed72b32d7540cf9a1b9ac12df95a_3081	197b0243bc5bc4c380ecfb8919a026b1_1437	79ccbe49faa72747a800162f6a36c0ca_3486	614e29224da4f337b8899b3142d81070_2432	d977e7edc1a56720a787e465ab4ce472_3555	e653c257947c2dd0a414de7cb159ba14_3538	31e4ba73e5ddb8c85dea419204f0df5a_2447	752b3971131f3206662b5e22da3b23aa_3590	83683a6c7ca473684645e0830a47223d_4760	03da1bd30b32560bef8e38ea7761d9fe_2778	c648bd7c3a222aa51bed3e3836bcf8c8_5460	B9T21_06120.p01	B9T15_08640.p01	B9T14_08610.p01	B9T11_06795.p01	B9T12_06035.p01	B9T18_08700.p01	B9T13_07305.p01	F387_00433.p01	A6V30_01180.p01
rplC		50S ribosomal protein L3	26	26	1	1	3682				644	644	644	B9T10_06160.p01	BMY_1584.p01	a04b031c37c06570dd644ef46d09ac8c_3165	2cf5bec40a3ef4476bf46f509f729c16_2395	102e21fe2bbcace64a7555dd0bcc9007_2949	4a9cac2c1a817d9acdec143b653b9a80_3573	ac8fed72b32d7540cf9a1b9ac12df95a_4007	197b0243bc5bc4c380ecfb8919a026b1_2449	79ccbe49faa72747a800162f6a36c0ca_3673	614e29224da4f337b8899b3142d81070_4330	d977e7edc1a56720a787e465ab4ce472_2447	e653c257947c2dd0a414de7cb159ba14_3386	31e4ba73e5ddb8c85dea419204f0df5a_3495	752b3971131f3206662b5e22da3b23aa_3745	83683a6c7ca473684645e0830a47223d_2757	03da1bd30b32560bef8e38ea7761d9fe_3722	c648bd7c3a222aa51bed3e3836bcf8c8_4297	B9T21_03900.p01	B9T15_06035.p01	B9T14_06005.p01	B9T11_03850.p01	B9T12_06880.p01	B9T18_06530.p01	B9T13_04710.p01	F387_00833.p01	A6V30_08870.p01
B9T21_04135		succinate dehydrogenase flavoprotein subunit	26	26	1	1	3636				1802	1802	1802	B9T10_06395.p01	BMY_1630.p01	a04b031c37c06570dd644ef46d09ac8c_2982	2cf5bec40a3ef4476bf46f509f729c16_2582	102e21fe2bbcace64a7555dd0bcc9007_3132	4a9cac2c1a817d9acdec143b653b9a80_3756	ac8fed72b32d7540cf9a1b9ac12df95a_3824	197b0243bc5bc4c380ecfb8919a026b1_2632	79ccbe49faa72747a800162f6a36c0ca_3856	614e29224da4f337b8899b3142d81070_4143	d977e7edc1a56720a787e465ab4ce472_2634	e653c257947c2dd0a414de7cb159ba14_3199	31e4ba73e5ddb8c85dea419204f0df5a_3682	752b3971131f3206662b5e22da3b23aa_3932	83683a6c7ca473684645e0830a47223d_2944	03da1bd30b32560bef8e38ea7761d9fe_3535	c648bd7c3a222aa51bed3e3836bcf8c8_4480	B9T21_04135.p01	B9T15_06270.p01	B9T14_06240.p01	B9T11_03615.p01	B9T12_07115.p01	B9T18_06300.p01	B9T13_04945.p01	F387_00787.p01	A6V30_09100.p01
rplX		50S ribosomal protein L24	26	26	1	1	3671				341	341	341	B9T10_06215.p01	BMY_1595.p01	a04b031c37c06570dd644ef46d09ac8c_3121	2cf5bec40a3ef4476bf46f509f729c16_2439	102e21fe2bbcace64a7555dd0bcc9007_2993	4a9cac2c1a817d9acdec143b653b9a80_3617	ac8fed72b32d7540cf9a1b9ac12df95a_3963	197b0243bc5bc4c380ecfb8919a026b1_2493	79ccbe49faa72747a800162f6a36c0ca_3717	614e29224da4f337b8899b3142d81070_4286	d977e7edc1a56720a787e465ab4ce472_2491	e653c257947c2dd0a414de7cb159ba14_3342	31e4ba73e5ddb8c85dea419204f0df5a_3539	752b3971131f3206662b5e22da3b23aa_3789	83683a6c7ca473684645e0830a47223d_2801	03da1bd30b32560bef8e38ea7761d9fe_3678	c648bd7c3a222aa51bed3e3836bcf8c8_4341	B9T21_03955.p01	B9T15_06090.p01	B9T14_06060.p01	B9T11_03795.p01	B9T12_06935.p01	B9T18_06475.p01	B9T13_04765.p01	F387_00822.p01	A6V30_08925.p01
J7607_03075		integration host factor subunit alpha	26	26	1	1	1043				302	302	302	B9T10_08890.p01	BMY_0955.p01	a04b031c37c06570dd644ef46d09ac8c_1390	2cf5bec40a3ef4476bf46f509f729c16_2252	102e21fe2bbcace64a7555dd0bcc9007_2806	4a9cac2c1a817d9acdec143b653b9a80_3177	ac8fed72b32d7540cf9a1b9ac12df95a_3093	197b0243bc5bc4c380ecfb8919a026b1_1425	79ccbe49faa72747a800162f6a36c0ca_3498	614e29224da4f337b8899b3142d81070_2420	d977e7edc1a56720a787e465ab4ce472_3543	e653c257947c2dd0a414de7cb159ba14_3526	31e4ba73e5ddb8c85dea419204f0df5a_2435	752b3971131f3206662b5e22da3b23aa_3602	83683a6c7ca473684645e0830a47223d_4772	03da1bd30b32560bef8e38ea7761d9fe_2790	c648bd7c3a222aa51bed3e3836bcf8c8_5448	B9T21_06135.p01	B9T15_08655.p01	B9T14_08625.p01	B9T11_06780.p01	B9T12_06050.p01	B9T18_08715.p01	B9T13_07320.p01	F387_00430.p01	A6V30_01195.p01
J7624_05215		ABC transporter permease subunit	26	26	1	1	1325				659	659	659	B9T10_00755.p01	BMY_2036.p01	a04b031c37c06570dd644ef46d09ac8c_4889	2cf5bec40a3ef4476bf46f509f729c16_3586	102e21fe2bbcace64a7555dd0bcc9007_4070	4a9cac2c1a817d9acdec143b653b9a80_2066	ac8fed72b32d7540cf9a1b9ac12df95a_5093	197b0243bc5bc4c380ecfb8919a026b1_3569	79ccbe49faa72747a800162f6a36c0ca_5507	614e29224da4f337b8899b3142d81070_5567	d977e7edc1a56720a787e465ab4ce472_5688	e653c257947c2dd0a414de7cb159ba14_5672	31e4ba73e5ddb8c85dea419204f0df5a_4648	752b3971131f3206662b5e22da3b23aa_5700	83683a6c7ca473684645e0830a47223d_5858	03da1bd30b32560bef8e38ea7761d9fe_4154	c648bd7c3a222aa51bed3e3836bcf8c8_3214	B9T21_00750.p01	B9T15_04275.p01	B9T14_00765.p01	B9T11_01980.p01	B9T12_00765.p01	B9T18_04350.p01	B9T13_00765.p01	F387_00986.p01	A6V30_02385.p01
mreD		rod shape-determining protein MreD	26	26	1	1	1090				482	482	482	B9T10_09135.p01	BMY_0904.p01	a04b031c37c06570dd644ef46d09ac8c_6871	2cf5bec40a3ef4476bf46f509f729c16_6918	102e21fe2bbcace64a7555dd0bcc9007_6211	4a9cac2c1a817d9acdec143b653b9a80_3370	ac8fed72b32d7540cf9a1b9ac12df95a_6511	197b0243bc5bc4c380ecfb8919a026b1_6662	79ccbe49faa72747a800162f6a36c0ca_6641	614e29224da4f337b8899b3142d81070_7219	d977e7edc1a56720a787e465ab4ce472_7338	e653c257947c2dd0a414de7cb159ba14_7331	31e4ba73e5ddb8c85dea419204f0df5a_6700	752b3971131f3206662b5e22da3b23aa_6480	83683a6c7ca473684645e0830a47223d_7409	03da1bd30b32560bef8e38ea7761d9fe_6842	c648bd7c3a222aa51bed3e3836bcf8c8_5255	B9T21_06380.p01	B9T15_08900.p01	B9T14_08870.p01	B9T11_06535.p01	B9T12_06295.p01	B9T18_08960.p01	B9T13_07565.p01	F387_00381.p01	A6V30_01440.p01
rplU		50S ribosomal protein L21	26	26	1	1	3711				314	314	314	B9T10_06030.p01	BMY_1557.p01	a04b031c37c06570dd644ef46d09ac8c_3270	2cf5bec40a3ef4476bf46f509f729c16_4685	102e21fe2bbcace64a7555dd0bcc9007_5184	4a9cac2c1a817d9acdec143b653b9a80_4523	ac8fed72b32d7540cf9a1b9ac12df95a_6692	197b0243bc5bc4c380ecfb8919a026b1_4914	79ccbe49faa72747a800162f6a36c0ca_5225	614e29224da4f337b8899b3142d81070_4435	d977e7edc1a56720a787e465ab4ce472_5266	e653c257947c2dd0a414de7cb159ba14_4536	31e4ba73e5ddb8c85dea419204f0df5a_7413	752b3971131f3206662b5e22da3b23aa_5295	83683a6c7ca473684645e0830a47223d_5576	03da1bd30b32560bef8e38ea7761d9fe_4566	c648bd7c3a222aa51bed3e3836bcf8c8_4192	B9T21_03770.p01	B9T15_05905.p01	B9T14_05875.p01	B9T11_03980.p01	B9T12_06750.p01	B9T18_06660.p01	B9T13_04525.p01	F387_01505.p01	A6V30_08740.p01
J7620_03720		invasion associated locus B family protein	26	26	1	1	871				641	641	641	B9T10_08065.p01	BMY_1126.p01	a04b031c37c06570dd644ef46d09ac8c_2036	2cf5bec40a3ef4476bf46f509f729c16_1608	102e21fe2bbcace64a7555dd0bcc9007_2144	4a9cac2c1a817d9acdec143b653b9a80_2515	ac8fed72b32d7540cf9a1b9ac12df95a_2447	197b0243bc5bc4c380ecfb8919a026b1_2079	79ccbe49faa72747a800162f6a36c0ca_2842	614e29224da4f337b8899b3142d81070_3078	d977e7edc1a56720a787e465ab4ce472_4201	e653c257947c2dd0a414de7cb159ba14_4184	31e4ba73e5ddb8c85dea419204f0df5a_3089	752b3971131f3206662b5e22da3b23aa_2952	83683a6c7ca473684645e0830a47223d_4114	03da1bd30b32560bef8e38ea7761d9fe_2144	c648bd7c3a222aa51bed3e3836bcf8c8_6086	B9T21_05320.p01	B9T15_07850.p01	B9T14_07820.p01	B9T11_07585.p01	B9T12_05230.p01	B9T18_07900.p01	B9T13_06515.p01	F387_00596.p01	A6V30_00400.p01
B9T15_04555		TatD family hydrolase	26	26	1	1	1273				773	773	773	B9T10_00495.p01	BMY_1980.p01	a04b031c37c06570dd644ef46d09ac8c_5095	2cf5bec40a3ef4476bf46f509f729c16_3378	102e21fe2bbcace64a7555dd0bcc9007_4293	4a9cac2c1a817d9acdec143b653b9a80_2290	ac8fed72b32d7540cf9a1b9ac12df95a_5300	197b0243bc5bc4c380ecfb8919a026b1_3777	79ccbe49faa72747a800162f6a36c0ca_5713	614e29224da4f337b8899b3142d81070_5344	d977e7edc1a56720a787e465ab4ce472_5465	e653c257947c2dd0a414de7cb159ba14_5448	31e4ba73e5ddb8c85dea419204f0df5a_4951	752b3971131f3206662b5e22da3b23aa_5492	83683a6c7ca473684645e0830a47223d_6082	03da1bd30b32560bef8e38ea7761d9fe_4361	c648bd7c3a222aa51bed3e3836bcf8c8_3422	B9T21_00490.p01	B9T15_04555.p01	B9T14_00485.p01	B9T11_02260.p01	B9T12_00505.p01	B9T18_04610.p01	B9T13_00485.p01	F387_00934.p01	A6V30_02125.p01
rpsO		30S ribosomal protein S15	26	26	1	1	878				266	266	266	B9T10_08100.p01	BMY_1119.p01	a04b031c37c06570dd644ef46d09ac8c_2008	2cf5bec40a3ef4476bf46f509f729c16_1636	102e21fe2bbcace64a7555dd0bcc9007_2172	4a9cac2c1a817d9acdec143b653b9a80_2543	ac8fed72b32d7540cf9a1b9ac12df95a_2475	197b0243bc5bc4c380ecfb8919a026b1_2051	79ccbe49faa72747a800162f6a36c0ca_2870	614e29224da4f337b8899b3142d81070_3050	d977e7edc1a56720a787e465ab4ce472_4173	e653c257947c2dd0a414de7cb159ba14_4156	31e4ba73e5ddb8c85dea419204f0df5a_3061	752b3971131f3206662b5e22da3b23aa_2980	83683a6c7ca473684645e0830a47223d_4142	03da1bd30b32560bef8e38ea7761d9fe_2172	c648bd7c3a222aa51bed3e3836bcf8c8_6058	B9T21_05355.p01	B9T15_07885.p01	B9T14_07855.p01	B9T11_07550.p01	B9T12_05265.p01	B9T18_07935.p01	B9T13_06550.p01	F387_00589.p01	A6V30_00435.p01
J7602_07765		ATP-binding cassette domain-containing protein	26	26	1	1	2769				779	779	779	B9T10_04700.p01	BMY_0773.p01	a04b031c37c06570dd644ef46d09ac8c_6111	2cf5bec40a3ef4476bf46f509f729c16_5911	102e21fe2bbcace64a7555dd0bcc9007_5427	4a9cac2c1a817d9acdec143b653b9a80_5462	ac8fed72b32d7540cf9a1b9ac12df95a_1992	197b0243bc5bc4c380ecfb8919a026b1_5220	79ccbe49faa72747a800162f6a36c0ca_2391	614e29224da4f337b8899b3142d81070_6041	d977e7edc1a56720a787e465ab4ce472_6162	e653c257947c2dd0a414de7cb159ba14_6148	31e4ba73e5ddb8c85dea419204f0df5a_5395	752b3971131f3206662b5e22da3b23aa_1939	83683a6c7ca473684645e0830a47223d_6524	03da1bd30b32560bef8e38ea7761d9fe_5492	c648bd7c3a222aa51bed3e3836bcf8c8_330	B9T21_07550.p01	B9T15_00410.p01	B9T14_04615.p01	B9T11_05955.p01	B9T12_03725.p01	B9T18_00410.p01	B9T13_08625.p01	F387_01620.p01	A6V30_05525.p01
fabA		3-hydroxyacyl-[acyl-carrier-protein] dehydratase FabA	26	26	1	1	3495				515	515	515	B9T10_07000.p01	BMY_1758.p01	a04b031c37c06570dd644ef46d09ac8c_2476	2cf5bec40a3ef4476bf46f509f729c16_2996	102e21fe2bbcace64a7555dd0bcc9007_3634	4a9cac2c1a817d9acdec143b653b9a80_4258	ac8fed72b32d7540cf9a1b9ac12df95a_3320	197b0243bc5bc4c380ecfb8919a026b1_3120	79ccbe49faa72747a800162f6a36c0ca_4268	614e29224da4f337b8899b3142d81070_3731	d977e7edc1a56720a787e465ab4ce472_3046	e653c257947c2dd0a414de7cb159ba14_2787	31e4ba73e5ddb8c85dea419204f0df5a_4172	752b3971131f3206662b5e22da3b23aa_4358	83683a6c7ca473684645e0830a47223d_3356	03da1bd30b32560bef8e38ea7761d9fe_3029	c648bd7c3a222aa51bed3e3836bcf8c8_4906	B9T21_04755.p01	B9T15_06890.p01	B9T14_06860.p01	B9T11_02995.p01	B9T12_07625.p01	B9T18_05690.p01	B9T13_05565.p01	F387_00661.p01	A6V30_09710.p01
rpsD		30S ribosomal protein S4	26	26	1	1	3658				623	623	623	B9T10_06280.p01	BMY_1606.p01	a04b031c37c06570dd644ef46d09ac8c_3069	2cf5bec40a3ef4476bf46f509f729c16_2491	102e21fe2bbcace64a7555dd0bcc9007_3045	4a9cac2c1a817d9acdec143b653b9a80_3669	ac8fed72b32d7540cf9a1b9ac12df95a_3911	197b0243bc5bc4c380ecfb8919a026b1_2545	79ccbe49faa72747a800162f6a36c0ca_3769	614e29224da4f337b8899b3142d81070_4234	d977e7edc1a56720a787e465ab4ce472_2543	e653c257947c2dd0a414de7cb159ba14_3290	31e4ba73e5ddb8c85dea419204f0df5a_3591	752b3971131f3206662b5e22da3b23aa_3841	83683a6c7ca473684645e0830a47223d_2853	03da1bd30b32560bef8e38ea7761d9fe_3626	c648bd7c3a222aa51bed3e3836bcf8c8_4393	B9T21_04020.p01	B9T15_06155.p01	B9T14_06125.p01	B9T11_03730.p01	B9T12_07000.p01	B9T18_06410.p01	B9T13_04830.p01	F387_00810.p01	A6V30_08985.p01
B9T10_08265		DUF177 domain-containing protein	26	26	1	1	914				401	401	401	B9T10_08265.p01	BMY_1083.p01	a04b031c37c06570dd644ef46d09ac8c_1872	2cf5bec40a3ef4476bf46f509f729c16_1772	102e21fe2bbcace64a7555dd0bcc9007_2308	4a9cac2c1a817d9acdec143b653b9a80_2679	ac8fed72b32d7540cf9a1b9ac12df95a_2611	197b0243bc5bc4c380ecfb8919a026b1_1915	79ccbe49faa72747a800162f6a36c0ca_3006	614e29224da4f337b8899b3142d81070_2914	d977e7edc1a56720a787e465ab4ce472_4037	e653c257947c2dd0a414de7cb159ba14_4020	31e4ba73e5ddb8c85dea419204f0df5a_2925	752b3971131f3206662b5e22da3b23aa_3116	83683a6c7ca473684645e0830a47223d_4278	03da1bd30b32560bef8e38ea7761d9fe_2308	c648bd7c3a222aa51bed3e3836bcf8c8_5926	B9T21_05520.p01	B9T15_08050.p01	B9T14_08020.p01	B9T11_07385.p01	B9T12_05430.p01	B9T18_08100.p01	B9T13_06715.p01	F387_00555.p01	A6V30_00595.p01
ndk		nucleoside-diphosphate kinase	26	26	1	1	3459				440	440	440	B9T10_07165.p01	BMY_1792.p01	a04b031c37c06570dd644ef46d09ac8c_2344	2cf5bec40a3ef4476bf46f509f729c16_3128	102e21fe2bbcace64a7555dd0bcc9007_3766	4a9cac2c1a817d9acdec143b653b9a80_4390	ac8fed72b32d7540cf9a1b9ac12df95a_3188	197b0243bc5bc4c380ecfb8919a026b1_3252	79ccbe49faa72747a800162f6a36c0ca_4400	614e29224da4f337b8899b3142d81070_3599	d977e7edc1a56720a787e465ab4ce472_3178	e653c257947c2dd0a414de7cb159ba14_2655	31e4ba73e5ddb8c85dea419204f0df5a_4304	752b3971131f3206662b5e22da3b23aa_4490	83683a6c7ca473684645e0830a47223d_3488	03da1bd30b32560bef8e38ea7761d9fe_2897	c648bd7c3a222aa51bed3e3836bcf8c8_5038	B9T21_04920.p01	B9T15_07055.p01	B9T14_07025.p01	B9T11_02830.p01	B9T12_07790.p01	B9T18_05525.p01	B9T13_05730.p01	F387_00628.p01	A6V30_09875.p01
B143_RS0104805		universal stress protein	26	26	1	1	251				437	437	437	B9T10_05465.p01	BMY_1447.p01	a04b031c37c06570dd644ef46d09ac8c_3696	2cf5bec40a3ef4476bf46f509f729c16_4280	102e21fe2bbcace64a7555dd0bcc9007_4749	4a9cac2c1a817d9acdec143b653b9a80_4958	ac8fed72b32d7540cf9a1b9ac12df95a_5710	197b0243bc5bc4c380ecfb8919a026b1_4476	79ccbe49faa72747a800162f6a36c0ca_4743	614e29224da4f337b8899b3142d81070_4901	d977e7edc1a56720a787e465ab4ce472_4801	e653c257947c2dd0a414de7cb159ba14_5000	31e4ba73e5ddb8c85dea419204f0df5a_5894	752b3971131f3206662b5e22da3b23aa_4824	83683a6c7ca473684645e0830a47223d_5111	03da1bd30b32560bef8e38ea7761d9fe_4976	c648bd7c3a222aa51bed3e3836bcf8c8_3741	B9T21_03235.p01	B9T15_05390.p01	B9T14_05375.p01	B9T11_04490.p01	B9T12_08190.p01	B9T18_07195.p01	B9T13_03965.p01	F387_01400.p01	A6V30_08090.p01
rpsI		30S ribosomal protein S9	26	26	1	1	2691				392	392	392	B9T10_05065.p01	BMY_0854.p01	a04b031c37c06570dd644ef46d09ac8c_7753	2cf5bec40a3ef4476bf46f509f729c16_7528	102e21fe2bbcace64a7555dd0bcc9007_7616	4a9cac2c1a817d9acdec143b653b9a80_7608	ac8fed72b32d7540cf9a1b9ac12df95a_7639	197b0243bc5bc4c380ecfb8919a026b1_7705	79ccbe49faa72747a800162f6a36c0ca_7461	614e29224da4f337b8899b3142d81070_7792	d977e7edc1a56720a787e465ab4ce472_7913	e653c257947c2dd0a414de7cb159ba14_7904	31e4ba73e5ddb8c85dea419204f0df5a_7669	752b3971131f3206662b5e22da3b23aa_7491	83683a6c7ca473684645e0830a47223d_6814	03da1bd30b32560bef8e38ea7761d9fe_7845	c648bd7c3a222aa51bed3e3836bcf8c8_34	B9T21_07920.p01	B9T15_00050.p01	B9T14_04975.p01	B9T11_06315.p01	B9T12_03360.p01	B9T18_00045.p01	B9T13_08985.p01	F387_01544.p01	A6V30_05895.p01
B9T12_09335		hypothetical protein	26	26	1	1	427				191	191	191	B9T10_07620.p01	BMY_1864.p01	a04b031c37c06570dd644ef46d09ac8c_7019	2cf5bec40a3ef4476bf46f509f729c16_7084	102e21fe2bbcace64a7555dd0bcc9007_6968	4a9cac2c1a817d9acdec143b653b9a80_7375	ac8fed72b32d7540cf9a1b9ac12df95a_6928	197b0243bc5bc4c380ecfb8919a026b1_7052	79ccbe49faa72747a800162f6a36c0ca_7677	614e29224da4f337b8899b3142d81070_7883	d977e7edc1a56720a787e465ab4ce472_3458	e653c257947c2dd0a414de7cb159ba14_2375	31e4ba73e5ddb8c85dea419204f0df5a_7717	752b3971131f3206662b5e22da3b23aa_6655	83683a6c7ca473684645e0830a47223d_3768	03da1bd30b32560bef8e38ea7761d9fe_7008	c648bd7c3a222aa51bed3e3836bcf8c8_7513	B9T21_09605.p01	B9T15_07460.p01	B9T14_07430.p01	B9T11_09630.p01	B9T12_09335.p01	B9T18_05140.p01	B9T13_06120.p01	F387_01845.p01	A6V30_07445.p01
ccoP		cytochrome-c oxidase, cbb3-type subunit III	26	26	1	1	3555				941	941	941	B9T10_06730.p01	BMY_1701.p01	a04b031c37c06570dd644ef46d09ac8c_2705	2cf5bec40a3ef4476bf46f509f729c16_2779	102e21fe2bbcace64a7555dd0bcc9007_3405	4a9cac2c1a817d9acdec143b653b9a80_4029	ac8fed72b32d7540cf9a1b9ac12df95a_3548	197b0243bc5bc4c380ecfb8919a026b1_2903	79ccbe49faa72747a800162f6a36c0ca_4052	614e29224da4f337b8899b3142d81070_3948	d977e7edc1a56720a787e465ab4ce472_2829	e653c257947c2dd0a414de7cb159ba14_3004	31e4ba73e5ddb8c85dea419204f0df5a_3955	752b3971131f3206662b5e22da3b23aa_4129	83683a6c7ca473684645e0830a47223d_3139	03da1bd30b32560bef8e38ea7761d9fe_3258	c648bd7c3a222aa51bed3e3836bcf8c8_4677	B9T21_04470.p01	B9T15_06605.p01	B9T14_06575.p01	B9T11_03280.p01	B9T12_07355.p01	B9T18_05960.p01	B9T13_05280.p01	F387_00718.p01	A6V30_09440.p01
B9T13_00850		SAM-dependent methyltransferase	26	26	1	1	1344				1184	1184	1184	B9T10_00835.p01	BMY_2052.p01	a04b031c37c06570dd644ef46d09ac8c_4823	2cf5bec40a3ef4476bf46f509f729c16_3652	102e21fe2bbcace64a7555dd0bcc9007_4000	4a9cac2c1a817d9acdec143b653b9a80_1996	ac8fed72b32d7540cf9a1b9ac12df95a_5023	197b0243bc5bc4c380ecfb8919a026b1_3503	79ccbe49faa72747a800162f6a36c0ca_5437	614e29224da4f337b8899b3142d81070_5636	d977e7edc1a56720a787e465ab4ce472_5758	e653c257947c2dd0a414de7cb159ba14_5742	31e4ba73e5ddb8c85dea419204f0df5a_4582	752b3971131f3206662b5e22da3b23aa_5766	83683a6c7ca473684645e0830a47223d_5788	03da1bd30b32560bef8e38ea7761d9fe_4088	c648bd7c3a222aa51bed3e3836bcf8c8_3148	B9T21_00830.p01	B9T15_04190.p01	B9T14_00850.p01	B9T11_01895.p01	B9T12_00845.p01	B9T18_04270.p01	B9T13_00850.p01	F387_01003.p01	A6V30_02465.p01
J7602_07585		DUF2059 domain-containing protein	26	26	1	1	2730				422	422	422	B9T10_04880.p01	BMY_0812.p01	a04b031c37c06570dd644ef46d09ac8c_6254	2cf5bec40a3ef4476bf46f509f729c16_5769	102e21fe2bbcace64a7555dd0bcc9007_5286	4a9cac2c1a817d9acdec143b653b9a80_5320	ac8fed72b32d7540cf9a1b9ac12df95a_2136	197b0243bc5bc4c380ecfb8919a026b1_5363	79ccbe49faa72747a800162f6a36c0ca_2535	614e29224da4f337b8899b3142d81070_5897	d977e7edc1a56720a787e465ab4ce472_6019	e653c257947c2dd0a414de7cb159ba14_6004	31e4ba73e5ddb8c85dea419204f0df5a_5539	752b3971131f3206662b5e22da3b23aa_1795	83683a6c7ca473684645e0830a47223d_6667	03da1bd30b32560bef8e38ea7761d9fe_5635	c648bd7c3a222aa51bed3e3836bcf8c8_186	B9T21_07730.p01	B9T15_00230.p01	B9T14_04795.p01	B9T11_06135.p01	B9T12_03540.p01	B9T18_00230.p01	B9T13_08805.p01	F387_01583.p01	A6V30_05705.p01
rplN		50S ribosomal protein L14	26	26	1	1	3672				368	368	368	B9T10_06210.p01	BMY_1594.p01	a04b031c37c06570dd644ef46d09ac8c_3125	2cf5bec40a3ef4476bf46f509f729c16_2435	102e21fe2bbcace64a7555dd0bcc9007_2989	4a9cac2c1a817d9acdec143b653b9a80_3613	ac8fed72b32d7540cf9a1b9ac12df95a_3967	197b0243bc5bc4c380ecfb8919a026b1_2489	79ccbe49faa72747a800162f6a36c0ca_3713	614e29224da4f337b8899b3142d81070_4290	d977e7edc1a56720a787e465ab4ce472_2487	e653c257947c2dd0a414de7cb159ba14_3346	31e4ba73e5ddb8c85dea419204f0df5a_3535	752b3971131f3206662b5e22da3b23aa_3785	83683a6c7ca473684645e0830a47223d_2797	03da1bd30b32560bef8e38ea7761d9fe_3682	c648bd7c3a222aa51bed3e3836bcf8c8_4337	B9T21_03950.p01	B9T15_06085.p01	B9T14_06055.p01	B9T11_03800.p01	B9T12_06930.p01	B9T18_06480.p01	B9T13_04760.p01	F387_00823.p01	A6V30_08920.p01
J7624_08710		HU family DNA-binding protein	26	26	1	1	1122				296	296	296	B9T10_09230.p01	BMY_0885.p01	a04b031c37c06570dd644ef46d09ac8c_6797	2cf5bec40a3ef4476bf46f509f729c16_7000	102e21fe2bbcace64a7555dd0bcc9007_6289	4a9cac2c1a817d9acdec143b653b9a80_3449	ac8fed72b32d7540cf9a1b9ac12df95a_6594	197b0243bc5bc4c380ecfb8919a026b1_6583	79ccbe49faa72747a800162f6a36c0ca_6719	614e29224da4f337b8899b3142d81070_7141	d977e7edc1a56720a787e465ab4ce472_7260	e653c257947c2dd0a414de7cb159ba14_7252	31e4ba73e5ddb8c85dea419204f0df5a_6622	752b3971131f3206662b5e22da3b23aa_6567	83683a6c7ca473684645e0830a47223d_7488	03da1bd30b32560bef8e38ea7761d9fe_6916	c648bd7c3a222aa51bed3e3836bcf8c8_5180	B9T21_06485.p01	B9T15_08995.p01	B9T14_08965.p01	B9T11_06440.p01	B9T12_06390.p01	B9T18_09055.p01	B9T13_07660.p01	F387_00362.p01	A6V30_01535.p01
rpoZ		DNA-directed RNA polymerase subunit omega	26	26	1	1	873				260	260	260	B9T10_08075.p01	BMY_1124.p01	a04b031c37c06570dd644ef46d09ac8c_2028	2cf5bec40a3ef4476bf46f509f729c16_1616	102e21fe2bbcace64a7555dd0bcc9007_2152	4a9cac2c1a817d9acdec143b653b9a80_2523	ac8fed72b32d7540cf9a1b9ac12df95a_2455	197b0243bc5bc4c380ecfb8919a026b1_2071	79ccbe49faa72747a800162f6a36c0ca_2850	614e29224da4f337b8899b3142d81070_3070	d977e7edc1a56720a787e465ab4ce472_4193	e653c257947c2dd0a414de7cb159ba14_4176	31e4ba73e5ddb8c85dea419204f0df5a_3081	752b3971131f3206662b5e22da3b23aa_2960	83683a6c7ca473684645e0830a47223d_4122	03da1bd30b32560bef8e38ea7761d9fe_2152	c648bd7c3a222aa51bed3e3836bcf8c8_6078	B9T21_05330.p01	B9T15_07860.p01	B9T14_07830.p01	B9T11_07575.p01	B9T12_05240.p01	B9T18_07910.p01	B9T13_06525.p01	F387_00594.p01	A6V30_00410.p01
rplJ		50S ribosomal protein L10	26	26	1	1	864				503	503	503	B9T10_08030.p01	BMY_1133.p01	a04b031c37c06570dd644ef46d09ac8c_2064	2cf5bec40a3ef4476bf46f509f729c16_1580	102e21fe2bbcace64a7555dd0bcc9007_2116	4a9cac2c1a817d9acdec143b653b9a80_2487	ac8fed72b32d7540cf9a1b9ac12df95a_2419	197b0243bc5bc4c380ecfb8919a026b1_2107	79ccbe49faa72747a800162f6a36c0ca_2814	614e29224da4f337b8899b3142d81070_3106	d977e7edc1a56720a787e465ab4ce472_4229	e653c257947c2dd0a414de7cb159ba14_4212	31e4ba73e5ddb8c85dea419204f0df5a_3117	752b3971131f3206662b5e22da3b23aa_2924	83683a6c7ca473684645e0830a47223d_4086	03da1bd30b32560bef8e38ea7761d9fe_2116	c648bd7c3a222aa51bed3e3836bcf8c8_6114	B9T21_05285.p01	B9T15_07815.p01	B9T14_07785.p01	B9T11_07620.p01	B9T12_05195.p01	B9T18_07865.p01	B9T13_06480.p01	F387_00603.p01	A6V30_00365.p01
mreC		rod shape-determining protein MreC	26	26	1	1	1091				878	878	878	B9T10_09140.p01	BMY_0903.p01	a04b031c37c06570dd644ef46d09ac8c_6867	2cf5bec40a3ef4476bf46f509f729c16_6922	102e21fe2bbcace64a7555dd0bcc9007_6215	4a9cac2c1a817d9acdec143b653b9a80_3374	ac8fed72b32d7540cf9a1b9ac12df95a_6515	197b0243bc5bc4c380ecfb8919a026b1_6658	79ccbe49faa72747a800162f6a36c0ca_6645	614e29224da4f337b8899b3142d81070_7215	d977e7edc1a56720a787e465ab4ce472_7334	e653c257947c2dd0a414de7cb159ba14_7327	31e4ba73e5ddb8c85dea419204f0df5a_6696	752b3971131f3206662b5e22da3b23aa_6484	83683a6c7ca473684645e0830a47223d_7413	03da1bd30b32560bef8e38ea7761d9fe_6846	c648bd7c3a222aa51bed3e3836bcf8c8_5251	B9T21_06385.p01	B9T15_08905.p01	B9T14_08875.p01	B9T11_06530.p01	B9T12_06300.p01	B9T18_08965.p01	B9T13_07570.p01	F387_00380.p01	A6V30_01445.p01
infA		translation initiation factor IF-1	26	26	1	1	943				218	218	218	B9T10_08410.p01	BMY_1054.p01	a04b031c37c06570dd644ef46d09ac8c_1758	2cf5bec40a3ef4476bf46f509f729c16_1886	102e21fe2bbcace64a7555dd0bcc9007_2422	4a9cac2c1a817d9acdec143b653b9a80_2793	ac8fed72b32d7540cf9a1b9ac12df95a_2725	197b0243bc5bc4c380ecfb8919a026b1_1801	79ccbe49faa72747a800162f6a36c0ca_3120	614e29224da4f337b8899b3142d81070_2800	d977e7edc1a56720a787e465ab4ce472_3923	e653c257947c2dd0a414de7cb159ba14_3906	31e4ba73e5ddb8c85dea419204f0df5a_2811	752b3971131f3206662b5e22da3b23aa_3230	83683a6c7ca473684645e0830a47223d_4392	03da1bd30b32560bef8e38ea7761d9fe_2422	c648bd7c3a222aa51bed3e3836bcf8c8_5812	B9T21_05665.p01	B9T15_08195.p01	B9T14_08165.p01	B9T11_07240.p01	B9T12_05575.p01	B9T18_08245.p01	B9T13_06860.p01	F387_00526.p01	A6V30_00740.p01
J7624_06175		peptidylprolyl isomerase	26	26	1	1	266				485	485	485	B9T10_05540.p01	BMY_1462.p01	a04b031c37c06570dd644ef46d09ac8c_3636	2cf5bec40a3ef4476bf46f509f729c16_4340	102e21fe2bbcace64a7555dd0bcc9007_4809	4a9cac2c1a817d9acdec143b653b9a80_4898	ac8fed72b32d7540cf9a1b9ac12df95a_5650	197b0243bc5bc4c380ecfb8919a026b1_4536	79ccbe49faa72747a800162f6a36c0ca_4803	614e29224da4f337b8899b3142d81070_4841	d977e7edc1a56720a787e465ab4ce472_4859	e653c257947c2dd0a414de7cb159ba14_4942	31e4ba73e5ddb8c85dea419204f0df5a_5954	752b3971131f3206662b5e22da3b23aa_4884	83683a6c7ca473684645e0830a47223d_5170	03da1bd30b32560bef8e38ea7761d9fe_4916	c648bd7c3a222aa51bed3e3836bcf8c8_3801	B9T21_03310.p01	B9T15_05465.p01	B9T14_05450.p01	B9T11_04415.p01	B9T12_08265.p01	B9T18_07120.p01	B9T13_04040.p01	F387_01415.p01	A6V30_08165.p01
rpmD		50S ribosomal protein L30	26	26	1	1	3664				179	179	179	B9T10_06250.p01	BMY_1602.p01	a04b031c37c06570dd644ef46d09ac8c_3093	2cf5bec40a3ef4476bf46f509f729c16_2467	102e21fe2bbcace64a7555dd0bcc9007_3021	4a9cac2c1a817d9acdec143b653b9a80_3645	ac8fed72b32d7540cf9a1b9ac12df95a_3935	197b0243bc5bc4c380ecfb8919a026b1_2521	79ccbe49faa72747a800162f6a36c0ca_3745	614e29224da4f337b8899b3142d81070_4258	d977e7edc1a56720a787e465ab4ce472_2519	e653c257947c2dd0a414de7cb159ba14_3314	31e4ba73e5ddb8c85dea419204f0df5a_3567	752b3971131f3206662b5e22da3b23aa_3817	83683a6c7ca473684645e0830a47223d_2829	03da1bd30b32560bef8e38ea7761d9fe_3650	c648bd7c3a222aa51bed3e3836bcf8c8_4369	B9T21_03990.p01	B9T15_06125.p01	B9T14_06095.p01	B9T11_03760.p01	B9T12_06970.p01	B9T18_06440.p01	B9T13_04800.p01	F387_00815.p01	A6V30_08960.p01
nth		endonuclease III	26	26	1	1	1277				632	632	632	B9T10_00515.p01	BMY_1984.p01	a04b031c37c06570dd644ef46d09ac8c_5079	2cf5bec40a3ef4476bf46f509f729c16_3394	102e21fe2bbcace64a7555dd0bcc9007_4277	4a9cac2c1a817d9acdec143b653b9a80_2274	ac8fed72b32d7540cf9a1b9ac12df95a_5284	197b0243bc5bc4c380ecfb8919a026b1_3761	79ccbe49faa72747a800162f6a36c0ca_5697	614e29224da4f337b8899b3142d81070_5360	d977e7edc1a56720a787e465ab4ce472_5481	e653c257947c2dd0a414de7cb159ba14_5464	31e4ba73e5ddb8c85dea419204f0df5a_4935	752b3971131f3206662b5e22da3b23aa_5508	83683a6c7ca473684645e0830a47223d_6066	03da1bd30b32560bef8e38ea7761d9fe_4345	c648bd7c3a222aa51bed3e3836bcf8c8_3406	B9T21_00510.p01	B9T15_04535.p01	B9T14_00505.p01	B9T11_02240.p01	B9T12_00525.p01	B9T18_04590.p01	B9T13_00505.p01	F387_00938.p01	A6V30_02145.p01
BMY_2071		methylated-DNA--[protein]-cysteine S-methyltransferase	26	26	1	1	1364				476	497	496	B9T10_00920.p01	BMY_2071.p01	a04b031c37c06570dd644ef46d09ac8c_4756	2cf5bec40a3ef4476bf46f509f729c16_3719	102e21fe2bbcace64a7555dd0bcc9007_3932	4a9cac2c1a817d9acdec143b653b9a80_1928	ac8fed72b32d7540cf9a1b9ac12df95a_4955	197b0243bc5bc4c380ecfb8919a026b1_3435	79ccbe49faa72747a800162f6a36c0ca_5369	614e29224da4f337b8899b3142d81070_5704	d977e7edc1a56720a787e465ab4ce472_5826	e653c257947c2dd0a414de7cb159ba14_5810	31e4ba73e5ddb8c85dea419204f0df5a_4514	752b3971131f3206662b5e22da3b23aa_5834	83683a6c7ca473684645e0830a47223d_5720	03da1bd30b32560bef8e38ea7761d9fe_4020	c648bd7c3a222aa51bed3e3836bcf8c8_3080	B9T21_00915.p01	B9T15_04105.p01	B9T14_00935.p01	B9T11_01810.p01	B9T12_00930.p01	B9T18_04175.p01	B9T13_00935.p01	F387_01020.p01	A6V30_02550.p01
trxA		thioredoxin	26	26	1	1	1341				323	326	324	B9T10_00820.p01	BMY_2049.p01	a04b031c37c06570dd644ef46d09ac8c_4835	2cf5bec40a3ef4476bf46f509f729c16_3640	102e21fe2bbcace64a7555dd0bcc9007_4012	4a9cac2c1a817d9acdec143b653b9a80_2008	ac8fed72b32d7540cf9a1b9ac12df95a_5035	197b0243bc5bc4c380ecfb8919a026b1_3515	79ccbe49faa72747a800162f6a36c0ca_5449	614e29224da4f337b8899b3142d81070_5624	d977e7edc1a56720a787e465ab4ce472_5746	e653c257947c2dd0a414de7cb159ba14_5730	31e4ba73e5ddb8c85dea419204f0df5a_4594	752b3971131f3206662b5e22da3b23aa_5754	83683a6c7ca473684645e0830a47223d_5800	03da1bd30b32560bef8e38ea7761d9fe_4100	c648bd7c3a222aa51bed3e3836bcf8c8_3160	B9T21_00815.p01	B9T15_04205.p01	B9T14_00835.p01	B9T11_01910.p01	B9T12_00830.p01	B9T18_04285.p01	B9T13_00835.p01	F387_01000.p01	A6V30_02450.p01
rsmG		16S rRNA (guanine(527)-N(7))-methyltransferase RsmG	26	26	1	1	162				629	629	629	B9T10_05230.p01	BMY_1396.p01	a04b031c37c06570dd644ef46d09ac8c_3883	2cf5bec40a3ef4476bf46f509f729c16_4085	102e21fe2bbcace64a7555dd0bcc9007_4555	4a9cac2c1a817d9acdec143b653b9a80_5153	ac8fed72b32d7540cf9a1b9ac12df95a_5899	197b0243bc5bc4c380ecfb8919a026b1_4242	79ccbe49faa72747a800162f6a36c0ca_4560	614e29224da4f337b8899b3142d81070_5088	d977e7edc1a56720a787e465ab4ce472_4615	e653c257947c2dd0a414de7cb159ba14_5187	31e4ba73e5ddb8c85dea419204f0df5a_5704	752b3971131f3206662b5e22da3b23aa_4634	83683a6c7ca473684645e0830a47223d_4925	03da1bd30b32560bef8e38ea7761d9fe_5161	c648bd7c3a222aa51bed3e3836bcf8c8_3550	B9T21_02995.p01	B9T15_05150.p01	B9T14_05135.p01	B9T11_04730.p01	B9T12_07950.p01	B9T18_07435.p01	B9T13_03725.p01	F387_01930.p01	A6V30_07285.p01
nusB		transcription antitermination factor NusB	26	26	1	1	868				431	431	431	B9T10_08050.p01	BMY_1129.p01	a04b031c37c06570dd644ef46d09ac8c_2048	2cf5bec40a3ef4476bf46f509f729c16_1596	102e21fe2bbcace64a7555dd0bcc9007_2132	4a9cac2c1a817d9acdec143b653b9a80_2503	ac8fed72b32d7540cf9a1b9ac12df95a_2435	197b0243bc5bc4c380ecfb8919a026b1_2091	79ccbe49faa72747a800162f6a36c0ca_2830	614e29224da4f337b8899b3142d81070_3090	d977e7edc1a56720a787e465ab4ce472_4213	e653c257947c2dd0a414de7cb159ba14_4196	31e4ba73e5ddb8c85dea419204f0df5a_3101	752b3971131f3206662b5e22da3b23aa_2940	83683a6c7ca473684645e0830a47223d_4102	03da1bd30b32560bef8e38ea7761d9fe_2132	c648bd7c3a222aa51bed3e3836bcf8c8_6098	B9T21_05305.p01	B9T15_07835.p01	B9T14_07805.p01	B9T11_07600.p01	B9T12_05215.p01	B9T18_07885.p01	B9T13_06500.p01	F387_00599.p01	A6V30_00385.p01
J7561_07015		adenylosuccinate synthase	26	26	1	1	2800				1298	1298	1298	B9T10_04600.p01	BMY_0753.p01	a04b031c37c06570dd644ef46d09ac8c_6036	2cf5bec40a3ef4476bf46f509f729c16_5985	102e21fe2bbcace64a7555dd0bcc9007_5550	4a9cac2c1a817d9acdec143b653b9a80_5585	ac8fed72b32d7540cf9a1b9ac12df95a_1917	197b0243bc5bc4c380ecfb8919a026b1_5094	79ccbe49faa72747a800162f6a36c0ca_2316	614e29224da4f337b8899b3142d81070_6162	d977e7edc1a56720a787e465ab4ce472_6284	e653c257947c2dd0a414de7cb159ba14_6271	31e4ba73e5ddb8c85dea419204f0df5a_5281	752b3971131f3206662b5e22da3b23aa_2014	83683a6c7ca473684645e0830a47223d_6401	03da1bd30b32560bef8e38ea7761d9fe_5417	c648bd7c3a222aa51bed3e3836bcf8c8_405	B9T21_07385.p01	B9T15_00510.p01	B9T14_04520.p01	B9T11_05860.p01	B9T12_03825.p01	B9T18_00510.p01	B9T13_08530.p01	F387_01639.p01	A6V30_05430.p01
J7558_01820		EamA family transporter	26	26	1	1	1028				359	359	359	B9T10_08820.p01	BMY_0970.p01	a04b031c37c06570dd644ef46d09ac8c_1446	2cf5bec40a3ef4476bf46f509f729c16_2196	102e21fe2bbcace64a7555dd0bcc9007_2750	4a9cac2c1a817d9acdec143b653b9a80_3121	ac8fed72b32d7540cf9a1b9ac12df95a_3037	197b0243bc5bc4c380ecfb8919a026b1_1481	79ccbe49faa72747a800162f6a36c0ca_3442	614e29224da4f337b8899b3142d81070_2476	d977e7edc1a56720a787e465ab4ce472_3599	e653c257947c2dd0a414de7cb159ba14_3582	31e4ba73e5ddb8c85dea419204f0df5a_2491	752b3971131f3206662b5e22da3b23aa_3546	83683a6c7ca473684645e0830a47223d_4716	03da1bd30b32560bef8e38ea7761d9fe_2734	c648bd7c3a222aa51bed3e3836bcf8c8_5504	B9T21_06065.p01	B9T15_08585.p01	B9T14_08555.p01	B9T11_06850.p01	B9T12_05980.p01	B9T18_08645.p01	B9T13_07250.p01	F387_00443.p01	A6V30_01130.p01
J7554_03120		serine protease	26	26	1	1	2745				1382	1382	1382	B9T10_04810.p01	BMY_0797.p01	a04b031c37c06570dd644ef46d09ac8c_6199	2cf5bec40a3ef4476bf46f509f729c16_5825	102e21fe2bbcace64a7555dd0bcc9007_5341	4a9cac2c1a817d9acdec143b653b9a80_5376	ac8fed72b32d7540cf9a1b9ac12df95a_2080	197b0243bc5bc4c380ecfb8919a026b1_5308	79ccbe49faa72747a800162f6a36c0ca_2479	614e29224da4f337b8899b3142d81070_5953	d977e7edc1a56720a787e465ab4ce472_6075	e653c257947c2dd0a414de7cb159ba14_6060	31e4ba73e5ddb8c85dea419204f0df5a_5483	752b3971131f3206662b5e22da3b23aa_1851	83683a6c7ca473684645e0830a47223d_6612	03da1bd30b32560bef8e38ea7761d9fe_5580	c648bd7c3a222aa51bed3e3836bcf8c8_242	B9T21_07660.p01	B9T15_00300.p01	B9T14_04725.p01	B9T11_06065.p01	B9T12_03615.p01	B9T18_00300.p01	B9T13_08735.p01	F387_01598.p01	A6V30_05635.p01
B9T18_07920		CHASE2 domain-containing protein	26	26	1	1	875				2339	2339	2339	B9T10_08085.p01	BMY_1122.p01	a04b031c37c06570dd644ef46d09ac8c_2020	2cf5bec40a3ef4476bf46f509f729c16_1624	102e21fe2bbcace64a7555dd0bcc9007_2160	4a9cac2c1a817d9acdec143b653b9a80_2531	ac8fed72b32d7540cf9a1b9ac12df95a_2463	197b0243bc5bc4c380ecfb8919a026b1_2063	79ccbe49faa72747a800162f6a36c0ca_2858	614e29224da4f337b8899b3142d81070_3062	d977e7edc1a56720a787e465ab4ce472_4185	e653c257947c2dd0a414de7cb159ba14_4168	31e4ba73e5ddb8c85dea419204f0df5a_3073	752b3971131f3206662b5e22da3b23aa_2968	83683a6c7ca473684645e0830a47223d_4130	03da1bd30b32560bef8e38ea7761d9fe_2160	c648bd7c3a222aa51bed3e3836bcf8c8_6070	B9T21_05340.p01	B9T15_07870.p01	B9T14_07840.p01	B9T11_07565.p01	B9T12_05250.p01	B9T18_07920.p01	B9T13_06535.p01	F387_00592.p01	A6V30_00420.p01
ccoG		cytochrome c oxidase accessory protein CcoG	26	26	1	1	3554				1409	1409	1409	B9T10_06735.p01	BMY_1702.p01	a04b031c37c06570dd644ef46d09ac8c_2701	2cf5bec40a3ef4476bf46f509f729c16_2783	102e21fe2bbcace64a7555dd0bcc9007_3409	4a9cac2c1a817d9acdec143b653b9a80_4033	ac8fed72b32d7540cf9a1b9ac12df95a_3544	197b0243bc5bc4c380ecfb8919a026b1_2907	79ccbe49faa72747a800162f6a36c0ca_4056	614e29224da4f337b8899b3142d81070_3944	d977e7edc1a56720a787e465ab4ce472_2833	e653c257947c2dd0a414de7cb159ba14_3000	31e4ba73e5ddb8c85dea419204f0df5a_3959	752b3971131f3206662b5e22da3b23aa_4133	83683a6c7ca473684645e0830a47223d_3143	03da1bd30b32560bef8e38ea7761d9fe_3254	c648bd7c3a222aa51bed3e3836bcf8c8_4681	B9T21_04475.p01	B9T15_06610.p01	B9T14_06580.p01	B9T11_03275.p01	B9T12_07360.p01	B9T18_05955.p01	B9T13_05285.p01	F387_00717.p01	A6V30_09445.p01
pyrF		orotidine-5'-phosphate decarboxylase	26	26	1	1	431				698	698	698	B9T10_07600.p01	BMY_1860.p01	a04b031c37c06570dd644ef46d09ac8c_7035	2cf5bec40a3ef4476bf46f509f729c16_7099	102e21fe2bbcace64a7555dd0bcc9007_6984	4a9cac2c1a817d9acdec143b653b9a80_7359	ac8fed72b32d7540cf9a1b9ac12df95a_6942	197b0243bc5bc4c380ecfb8919a026b1_7068	79ccbe49faa72747a800162f6a36c0ca_7661	614e29224da4f337b8899b3142d81070_7899	d977e7edc1a56720a787e465ab4ce472_3442	e653c257947c2dd0a414de7cb159ba14_2391	31e4ba73e5ddb8c85dea419204f0df5a_7733	752b3971131f3206662b5e22da3b23aa_6670	83683a6c7ca473684645e0830a47223d_3752	03da1bd30b32560bef8e38ea7761d9fe_7024	c648bd7c3a222aa51bed3e3836bcf8c8_7497	B9T21_09585.p01	B9T15_07440.p01	B9T14_07410.p01	B9T11_09650.p01	B9T12_09355.p01	B9T18_05160.p01	B9T13_06100.p01	F387_01849.p01	A6V30_07465.p01
J7547_03060		DUF489 family protein	26	26	1	1	946				614	614	614	B9T10_08425.p01	BMY_1051.p01	a04b031c37c06570dd644ef46d09ac8c_1746	2cf5bec40a3ef4476bf46f509f729c16_1898	102e21fe2bbcace64a7555dd0bcc9007_2434	4a9cac2c1a817d9acdec143b653b9a80_2805	ac8fed72b32d7540cf9a1b9ac12df95a_2737	197b0243bc5bc4c380ecfb8919a026b1_1789	79ccbe49faa72747a800162f6a36c0ca_3132	614e29224da4f337b8899b3142d81070_2788	d977e7edc1a56720a787e465ab4ce472_3911	e653c257947c2dd0a414de7cb159ba14_3894	31e4ba73e5ddb8c85dea419204f0df5a_2799	752b3971131f3206662b5e22da3b23aa_3242	83683a6c7ca473684645e0830a47223d_4404	03da1bd30b32560bef8e38ea7761d9fe_2434	c648bd7c3a222aa51bed3e3836bcf8c8_5800	B9T21_05680.p01	B9T15_08210.p01	B9T14_08180.p01	B9T11_07225.p01	B9T12_05590.p01	B9T18_08260.p01	B9T13_06875.p01	F387_00523.p01	A6V30_00755.p01
B9T15_07000		HAMP domain-containing protein	26	26	1	1	3470				1391	1391	1391	B9T10_07110.p01	BMY_1781.p01	a04b031c37c06570dd644ef46d09ac8c_2388	2cf5bec40a3ef4476bf46f509f729c16_3084	102e21fe2bbcace64a7555dd0bcc9007_3722	4a9cac2c1a817d9acdec143b653b9a80_4346	ac8fed72b32d7540cf9a1b9ac12df95a_3232	197b0243bc5bc4c380ecfb8919a026b1_3208	79ccbe49faa72747a800162f6a36c0ca_4356	614e29224da4f337b8899b3142d81070_3643	d977e7edc1a56720a787e465ab4ce472_3134	e653c257947c2dd0a414de7cb159ba14_2699	31e4ba73e5ddb8c85dea419204f0df5a_4260	752b3971131f3206662b5e22da3b23aa_4446	83683a6c7ca473684645e0830a47223d_3444	03da1bd30b32560bef8e38ea7761d9fe_2941	c648bd7c3a222aa51bed3e3836bcf8c8_4994	B9T21_04865.p01	B9T15_07000.p01	B9T14_06970.p01	B9T11_02885.p01	B9T12_07735.p01	B9T18_05580.p01	B9T13_05675.p01	F387_00639.p01	A6V30_09820.p01
J7624_08560		PhoH family protein	26	26	1	1	1078				962	962	962	B9T10_09080.p01	BMY_0916.p01	a04b031c37c06570dd644ef46d09ac8c_6915	2cf5bec40a3ef4476bf46f509f729c16_6874	102e21fe2bbcace64a7555dd0bcc9007_6167	4a9cac2c1a817d9acdec143b653b9a80_3326	ac8fed72b32d7540cf9a1b9ac12df95a_6467	197b0243bc5bc4c380ecfb8919a026b1_6706	79ccbe49faa72747a800162f6a36c0ca_6598	614e29224da4f337b8899b3142d81070_7263	d977e7edc1a56720a787e465ab4ce472_7382	e653c257947c2dd0a414de7cb159ba14_7375	31e4ba73e5ddb8c85dea419204f0df5a_6744	752b3971131f3206662b5e22da3b23aa_6436	83683a6c7ca473684645e0830a47223d_7365	03da1bd30b32560bef8e38ea7761d9fe_6799	c648bd7c3a222aa51bed3e3836bcf8c8_5299	B9T21_06325.p01	B9T15_08845.p01	B9T14_08815.p01	B9T11_06590.p01	B9T12_06240.p01	B9T18_08905.p01	B9T13_07510.p01	F387_00392.p01	A6V30_01385.p01
B9T13_06790		anion permease	26	26	1	1	929				1805	1805	1805	B9T10_08340.p01	BMY_1068.p01	a04b031c37c06570dd644ef46d09ac8c_1812	2cf5bec40a3ef4476bf46f509f729c16_1832	102e21fe2bbcace64a7555dd0bcc9007_2368	4a9cac2c1a817d9acdec143b653b9a80_2739	ac8fed72b32d7540cf9a1b9ac12df95a_2671	197b0243bc5bc4c380ecfb8919a026b1_1855	79ccbe49faa72747a800162f6a36c0ca_3066	614e29224da4f337b8899b3142d81070_2854	d977e7edc1a56720a787e465ab4ce472_3977	e653c257947c2dd0a414de7cb159ba14_3960	31e4ba73e5ddb8c85dea419204f0df5a_2865	752b3971131f3206662b5e22da3b23aa_3176	83683a6c7ca473684645e0830a47223d_4338	03da1bd30b32560bef8e38ea7761d9fe_2368	c648bd7c3a222aa51bed3e3836bcf8c8_5866	B9T21_05595.p01	B9T15_08125.p01	B9T14_08095.p01	B9T11_07310.p01	B9T12_05505.p01	B9T18_08175.p01	B9T13_06790.p01	F387_00540.p01	A6V30_00670.p01
J7622_06170		response regulator	26	26	1	1	155				371	371	371	B9T10_05195.p01	BMY_1389.p01	a04b031c37c06570dd644ef46d09ac8c_3911	2cf5bec40a3ef4476bf46f509f729c16_4058	102e21fe2bbcace64a7555dd0bcc9007_4527	4a9cac2c1a817d9acdec143b653b9a80_5181	ac8fed72b32d7540cf9a1b9ac12df95a_5927	197b0243bc5bc4c380ecfb8919a026b1_4214	79ccbe49faa72747a800162f6a36c0ca_4532	614e29224da4f337b8899b3142d81070_5116	d977e7edc1a56720a787e465ab4ce472_4587	e653c257947c2dd0a414de7cb159ba14_5215	31e4ba73e5ddb8c85dea419204f0df5a_5676	752b3971131f3206662b5e22da3b23aa_4606	83683a6c7ca473684645e0830a47223d_4897	03da1bd30b32560bef8e38ea7761d9fe_5189	c648bd7c3a222aa51bed3e3836bcf8c8_3522	B9T21_02960.p01	B9T15_05115.p01	B9T14_05100.p01	B9T11_04765.p01	B9T12_07915.p01	B9T18_07470.p01	B9T13_03690.p01	F387_01923.p01	A6V30_07320.p01
J7554_07490		N-acetylglutaminylglutamine amidotransferase	26	26	1	1	3014				1781	1781	1781	B9T10_10020.p01	BMY_1355.p01	a04b031c37c06570dd644ef46d09ac8c_6384	2cf5bec40a3ef4476bf46f509f729c16_6513	102e21fe2bbcace64a7555dd0bcc9007_6674	4a9cac2c1a817d9acdec143b653b9a80_6703	ac8fed72b32d7540cf9a1b9ac12df95a_6329	197b0243bc5bc4c380ecfb8919a026b1_6844	79ccbe49faa72747a800162f6a36c0ca_5957	614e29224da4f337b8899b3142d81070_6372	d977e7edc1a56720a787e465ab4ce472_6825	e653c257947c2dd0a414de7cb159ba14_6813	31e4ba73e5ddb8c85dea419204f0df5a_6211	752b3971131f3206662b5e22da3b23aa_6002	83683a6c7ca473684645e0830a47223d_6897	03da1bd30b32560bef8e38ea7761d9fe_6158	c648bd7c3a222aa51bed3e3836bcf8c8_6377	B9T21_08030.p01	B9T15_09150.p01	B9T14_09120.p01	B9T11_09540.p01	B9T12_09245.p01	B9T18_09210.p01	B9T13_09095.p01	F387_01352.p01	A6V30_06005.p01
B9T12_05685		ABC transporter permease subunit	26	26	1	1	964				662	662	662	B9T10_08520.p01	BMY_1032.p01	a04b031c37c06570dd644ef46d09ac8c_1671	2cf5bec40a3ef4476bf46f509f729c16_1971	102e21fe2bbcace64a7555dd0bcc9007_2509	4a9cac2c1a817d9acdec143b653b9a80_2880	ac8fed72b32d7540cf9a1b9ac12df95a_2812	197b0243bc5bc4c380ecfb8919a026b1_1714	79ccbe49faa72747a800162f6a36c0ca_3205	614e29224da4f337b8899b3142d81070_2713	d977e7edc1a56720a787e465ab4ce472_3836	e653c257947c2dd0a414de7cb159ba14_3819	31e4ba73e5ddb8c85dea419204f0df5a_2724	752b3971131f3206662b5e22da3b23aa_3317	83683a6c7ca473684645e0830a47223d_4479	03da1bd30b32560bef8e38ea7761d9fe_2509	c648bd7c3a222aa51bed3e3836bcf8c8_5725	B9T21_05775.p01	B9T15_08305.p01	B9T14_08275.p01	B9T11_07130.p01	B9T12_05685.p01	B9T18_08355.p01	B9T13_06970.p01	F387_00504.p01	A6V30_00850.p01
J7560_09075		UUP1 family membrane protein	26	26	1	1	448				1574	1574	1574	B9T10_07495.p01	BMY_1839.p01	a04b031c37c06570dd644ef46d09ac8c_7115	2cf5bec40a3ef4476bf46f509f729c16_7178	102e21fe2bbcace64a7555dd0bcc9007_7062	4a9cac2c1a817d9acdec143b653b9a80_7280	ac8fed72b32d7540cf9a1b9ac12df95a_7021	197b0243bc5bc4c380ecfb8919a026b1_7147	79ccbe49faa72747a800162f6a36c0ca_7371	614e29224da4f337b8899b3142d81070_3415	d977e7edc1a56720a787e465ab4ce472_3362	e653c257947c2dd0a414de7cb159ba14_2471	31e4ba73e5ddb8c85dea419204f0df5a_7451	752b3971131f3206662b5e22da3b23aa_6749	83683a6c7ca473684645e0830a47223d_3672	03da1bd30b32560bef8e38ea7761d9fe_7102	c648bd7c3a222aa51bed3e3836bcf8c8_7417	B9T21_09480.p01	B9T15_07335.p01	B9T14_07305.p01	B9T11_09755.p01	B9T12_09460.p01	B9T18_05265.p01	B9T13_05995.p01	F387_01870.p01	A6V30_07570.p01
F387_01691		phospho-N-acetylmuramoyl-pentapeptide- transferase	26	26	1	1	2565				1082	1082	1082	B9T10_04000.p01	BMY_0635.p01	a04b031c37c06570dd644ef46d09ac8c_5701	2cf5bec40a3ef4476bf46f509f729c16_5586	102e21fe2bbcace64a7555dd0bcc9007_6035	4a9cac2c1a817d9acdec143b653b9a80_6088	ac8fed72b32d7540cf9a1b9ac12df95a_1491	197b0243bc5bc4c380ecfb8919a026b1_6047	79ccbe49faa72747a800162f6a36c0ca_1868	614e29224da4f337b8899b3142d81070_6805	d977e7edc1a56720a787e465ab4ce472_7145	e653c257947c2dd0a414de7cb159ba14_7136	31e4ba73e5ddb8c85dea419204f0df5a_253	752b3971131f3206662b5e22da3b23aa_2444	83683a6c7ca473684645e0830a47223d_269	03da1bd30b32560bef8e38ea7761d9fe_5880	c648bd7c3a222aa51bed3e3836bcf8c8_859	B9T21_06805.p01	B9T15_01065.p01	B9T14_03965.p01	B9T11_05305.p01	B9T12_04385.p01	B9T18_01120.p01	B9T13_07980.p01	F387_01691.p01	A6V30_06820.p01
mscL		large conductance mechanosensitive channel protein MscL	26	26	1	1	1303				431	431	431	B9T10_00645.p01	BMY_2014.p01	a04b031c37c06570dd644ef46d09ac8c_4975	2cf5bec40a3ef4476bf46f509f729c16_3498	102e21fe2bbcace64a7555dd0bcc9007_4157	4a9cac2c1a817d9acdec143b653b9a80_2154	ac8fed72b32d7540cf9a1b9ac12df95a_5181	197b0243bc5bc4c380ecfb8919a026b1_3657	79ccbe49faa72747a800162f6a36c0ca_5595	614e29224da4f337b8899b3142d81070_5479	d977e7edc1a56720a787e465ab4ce472_5601	e653c257947c2dd0a414de7cb159ba14_5584	31e4ba73e5ddb8c85dea419204f0df5a_4736	752b3971131f3206662b5e22da3b23aa_5612	83683a6c7ca473684645e0830a47223d_5946	03da1bd30b32560bef8e38ea7761d9fe_4241	c648bd7c3a222aa51bed3e3836bcf8c8_3302	B9T21_00640.p01	B9T15_04385.p01	B9T14_00655.p01	B9T11_02090.p01	B9T12_00655.p01	B9T18_04460.p01	B9T13_00655.p01	F387_00964.p01	A6V30_02275.p01
B9T14_09000		tRNA-(ms[2]io[6]A)-hydroxylase	26	26	1	1	1132				611	611	611	B9T10_09265.p01	BMY_0878.p01	a04b031c37c06570dd644ef46d09ac8c_6765	2cf5bec40a3ef4476bf46f509f729c16_7026	102e21fe2bbcace64a7555dd0bcc9007_6317	4a9cac2c1a817d9acdec143b653b9a80_3477	ac8fed72b32d7540cf9a1b9ac12df95a_6622	197b0243bc5bc4c380ecfb8919a026b1_6556	79ccbe49faa72747a800162f6a36c0ca_6747	614e29224da4f337b8899b3142d81070_7114	d977e7edc1a56720a787e465ab4ce472_7232	e653c257947c2dd0a414de7cb159ba14_7224	31e4ba73e5ddb8c85dea419204f0df5a_6594	752b3971131f3206662b5e22da3b23aa_6595	83683a6c7ca473684645e0830a47223d_7516	03da1bd30b32560bef8e38ea7761d9fe_6948	c648bd7c3a222aa51bed3e3836bcf8c8_5152	B9T21_06535.p01	B9T15_09030.p01	B9T14_09000.p01	B9T11_06405.p01	B9T12_06425.p01	B9T18_09090.p01	B9T13_07695.p01	F387_00355.p01	A6V30_01570.p01
A6V30_09515		AzlD domain-containing protein	26	26	1	1	3539				335	338	337	B9T10_06805.p01	BMY_1717.p01	a04b031c37c06570dd644ef46d09ac8c_2644	2cf5bec40a3ef4476bf46f509f729c16_2840	102e21fe2bbcace64a7555dd0bcc9007_3466	4a9cac2c1a817d9acdec143b653b9a80_4090	ac8fed72b32d7540cf9a1b9ac12df95a_3487	197b0243bc5bc4c380ecfb8919a026b1_2964	79ccbe49faa72747a800162f6a36c0ca_4112	614e29224da4f337b8899b3142d81070_3887	d977e7edc1a56720a787e465ab4ce472_2890	e653c257947c2dd0a414de7cb159ba14_2943	31e4ba73e5ddb8c85dea419204f0df5a_4016	752b3971131f3206662b5e22da3b23aa_4190	83683a6c7ca473684645e0830a47223d_3200	03da1bd30b32560bef8e38ea7761d9fe_3197	c648bd7c3a222aa51bed3e3836bcf8c8_4738	B9T21_04545.p01	B9T15_06680.p01	B9T14_06650.p01	B9T11_03205.p01	B9T12_07430.p01	B9T18_05885.p01	B9T13_05355.p01	F387_00703.p01	A6V30_09515.p01
J7561_09455		MacB family efflux pump subunit	26	26	1	1	2520				1958	1958	1958	B9T10_03850.p01	BMY_0605.p01	a04b031c37c06570dd644ef46d09ac8c_5579	2cf5bec40a3ef4476bf46f509f729c16_4749	102e21fe2bbcace64a7555dd0bcc9007_7569	4a9cac2c1a817d9acdec143b653b9a80_7501	ac8fed72b32d7540cf9a1b9ac12df95a_1368	197b0243bc5bc4c380ecfb8919a026b1_7593	79ccbe49faa72747a800162f6a36c0ca_1749	614e29224da4f337b8899b3142d81070_2280	d977e7edc1a56720a787e465ab4ce472_2293	e653c257947c2dd0a414de7cb159ba14_2280	31e4ba73e5ddb8c85dea419204f0df5a_376	752b3971131f3206662b5e22da3b23aa_2567	83683a6c7ca473684645e0830a47223d_388	03da1bd30b32560bef8e38ea7761d9fe_6003	c648bd7c3a222aa51bed3e3836bcf8c8_986	B9T21_06655.p01	B9T15_01215.p01	B9T14_03815.p01	B9T11_05155.p01	B9T12_04535.p01	B9T18_01275.p01	B9T13_07825.p01	F387_01183.p01	A6V30_06975.p01
B143_RS0104980		TIGR00730 family Rossman fold protein	26	26	1	1	287				602	602	602	B9T10_05645.p01	BMY_1482.p01	a04b031c37c06570dd644ef46d09ac8c_3553	2cf5bec40a3ef4476bf46f509f729c16_4421	102e21fe2bbcace64a7555dd0bcc9007_4892	4a9cac2c1a817d9acdec143b653b9a80_4815	ac8fed72b32d7540cf9a1b9ac12df95a_5568	197b0243bc5bc4c380ecfb8919a026b1_4619	79ccbe49faa72747a800162f6a36c0ca_4886	614e29224da4f337b8899b3142d81070_4758	d977e7edc1a56720a787e465ab4ce472_4942	e653c257947c2dd0a414de7cb159ba14_4859	31e4ba73e5ddb8c85dea419204f0df5a_6035	752b3971131f3206662b5e22da3b23aa_4967	83683a6c7ca473684645e0830a47223d_5253	03da1bd30b32560bef8e38ea7761d9fe_4833	c648bd7c3a222aa51bed3e3836bcf8c8_3884	B9T21_03415.p01	B9T15_05570.p01	B9T14_05555.p01	B9T11_04310.p01	B9T12_08370.p01	B9T18_07015.p01	B9T13_04145.p01	F387_01436.p01	A6V30_08270.p01
pssA		CDP-diacylglycerol--serine O-phosphatidyltransferase	26	26	1	1	1162				836	836	836	B9T10_00030.p01	BMY_1882.p01	a04b031c37c06570dd644ef46d09ac8c_7664	2cf5bec40a3ef4476bf46f509f729c16_7322	102e21fe2bbcace64a7555dd0bcc9007_7380	4a9cac2c1a817d9acdec143b653b9a80_7157	ac8fed72b32d7540cf9a1b9ac12df95a_7547	197b0243bc5bc4c380ecfb8919a026b1_4134	79ccbe49faa72747a800162f6a36c0ca_7212	614e29224da4f337b8899b3142d81070_7581	d977e7edc1a56720a787e465ab4ce472_7704	e653c257947c2dd0a414de7cb159ba14_7695	31e4ba73e5ddb8c85dea419204f0df5a_7227	752b3971131f3206662b5e22da3b23aa_7107	83683a6c7ca473684645e0830a47223d_7950	03da1bd30b32560bef8e38ea7761d9fe_7431	c648bd7c3a222aa51bed3e3836bcf8c8_6948	B9T21_00030.p01	B9T15_05005.p01	B9T14_00035.p01	B9T11_02710.p01	B9T12_00030.p01	B9T18_05090.p01	B9T13_00035.p01	F387_00841.p01	A6V30_01670.p01
glyS		glycine--tRNA ligase subunit beta	26	26	1	1	3048				2072	2072	2072	B9T10_09860.p01	BMY_1320.p01	a04b031c37c06570dd644ef46d09ac8c_6511	2cf5bec40a3ef4476bf46f509f729c16_6379	102e21fe2bbcace64a7555dd0bcc9007_6548	4a9cac2c1a817d9acdec143b653b9a80_6575	ac8fed72b32d7540cf9a1b9ac12df95a_6202	197b0243bc5bc4c380ecfb8919a026b1_6980	79ccbe49faa72747a800162f6a36c0ca_6085	614e29224da4f337b8899b3142d81070_6508	d977e7edc1a56720a787e465ab4ce472_6689	e653c257947c2dd0a414de7cb159ba14_6678	31e4ba73e5ddb8c85dea419204f0df5a_6339	752b3971131f3206662b5e22da3b23aa_6138	83683a6c7ca473684645e0830a47223d_7032	03da1bd30b32560bef8e38ea7761d9fe_6284	c648bd7c3a222aa51bed3e3836bcf8c8_6503	B9T21_08190.p01	B9T15_09320.p01	B9T14_09290.p01	B9T11_09370.p01	B9T12_09085.p01	B9T18_09370.p01	B9T13_09265.p01	F387_01318.p01	A6V30_06165.p01
serS		serine--tRNA ligase	26	26	1	1	1294				1271	1271	1271	B9T10_00600.p01	BMY_2000.p01	a04b031c37c06570dd644ef46d09ac8c_5011	2cf5bec40a3ef4476bf46f509f729c16_3462	102e21fe2bbcace64a7555dd0bcc9007_4209	4a9cac2c1a817d9acdec143b653b9a80_2206	ac8fed72b32d7540cf9a1b9ac12df95a_5216	197b0243bc5bc4c380ecfb8919a026b1_3693	79ccbe49faa72747a800162f6a36c0ca_5631	614e29224da4f337b8899b3142d81070_5427	d977e7edc1a56720a787e465ab4ce472_5549	e653c257947c2dd0a414de7cb159ba14_5532	31e4ba73e5ddb8c85dea419204f0df5a_4868	752b3971131f3206662b5e22da3b23aa_5576	83683a6c7ca473684645e0830a47223d_5998	03da1bd30b32560bef8e38ea7761d9fe_4277	c648bd7c3a222aa51bed3e3836bcf8c8_3338	B9T21_00595.p01	B9T15_04450.p01	B9T14_00590.p01	B9T11_02155.p01	B9T12_00610.p01	B9T18_04505.p01	B9T13_00590.p01	F387_00955.p01	A6V30_02230.p01
bfr		bacterioferritin	26	26	1	1	887				464	464	464	B9T10_08135.p01	BMY_1110.p01	a04b031c37c06570dd644ef46d09ac8c_1976	2cf5bec40a3ef4476bf46f509f729c16_1668	102e21fe2bbcace64a7555dd0bcc9007_2204	4a9cac2c1a817d9acdec143b653b9a80_2575	ac8fed72b32d7540cf9a1b9ac12df95a_2507	197b0243bc5bc4c380ecfb8919a026b1_2019	79ccbe49faa72747a800162f6a36c0ca_2902	614e29224da4f337b8899b3142d81070_3018	d977e7edc1a56720a787e465ab4ce472_4141	e653c257947c2dd0a414de7cb159ba14_4124	31e4ba73e5ddb8c85dea419204f0df5a_3029	752b3971131f3206662b5e22da3b23aa_3012	83683a6c7ca473684645e0830a47223d_4174	03da1bd30b32560bef8e38ea7761d9fe_2204	c648bd7c3a222aa51bed3e3836bcf8c8_6030	B9T21_05390.p01	B9T15_07920.p01	B9T14_07890.p01	B9T11_07515.p01	B9T12_05300.p01	B9T18_07970.p01	B9T13_06585.p01	F387_00581.p01	A6V30_00465.p01
J7560_08165		NADH-quinone oxidoreductase subunit J	26	26	1	1	3025				665	665	665	B9T10_09970.p01	BMY_1343.p01	a04b031c37c06570dd644ef46d09ac8c_6423	2cf5bec40a3ef4476bf46f509f729c16_6466	102e21fe2bbcace64a7555dd0bcc9007_6634	4a9cac2c1a817d9acdec143b653b9a80_6663	ac8fed72b32d7540cf9a1b9ac12df95a_6289	197b0243bc5bc4c380ecfb8919a026b1_6892	79ccbe49faa72747a800162f6a36c0ca_5997	614e29224da4f337b8899b3142d81070_6420	d977e7edc1a56720a787e465ab4ce472_6777	e653c257947c2dd0a414de7cb159ba14_6765	31e4ba73e5ddb8c85dea419204f0df5a_6251	752b3971131f3206662b5e22da3b23aa_6050	83683a6c7ca473684645e0830a47223d_6945	03da1bd30b32560bef8e38ea7761d9fe_6198	c648bd7c3a222aa51bed3e3836bcf8c8_6417	B9T21_08080.p01	B9T15_09210.p01	B9T14_09180.p01	B9T11_09480.p01	B9T12_09195.p01	B9T18_09260.p01	B9T13_09155.p01	F387_01340.p01	A6V30_06055.p01
B9T14_00550		ABC transporter permease	26	26	1	1	1286				806	812	806	B9T10_00560.p01	BMY_1992.p01	a04b031c37c06570dd644ef46d09ac8c_5043	2cf5bec40a3ef4476bf46f509f729c16_3430	102e21fe2bbcace64a7555dd0bcc9007_4241	4a9cac2c1a817d9acdec143b653b9a80_2238	ac8fed72b32d7540cf9a1b9ac12df95a_5248	197b0243bc5bc4c380ecfb8919a026b1_3725	79ccbe49faa72747a800162f6a36c0ca_5661	614e29224da4f337b8899b3142d81070_5395	d977e7edc1a56720a787e465ab4ce472_5517	e653c257947c2dd0a414de7cb159ba14_5500	31e4ba73e5ddb8c85dea419204f0df5a_4899	752b3971131f3206662b5e22da3b23aa_5544	83683a6c7ca473684645e0830a47223d_6030	03da1bd30b32560bef8e38ea7761d9fe_4309	c648bd7c3a222aa51bed3e3836bcf8c8_3370	B9T21_00555.p01	B9T15_04490.p01	B9T14_00550.p01	B9T11_02195.p01	B9T12_00570.p01	B9T18_04545.p01	B9T13_00550.p01	F387_00947.p01	A6V30_02190.p01
J7561_05520		hypothetical protein	26	26	1	1	3457				731	731	731	B9T10_07175.p01	BMY_1794.p01	a04b031c37c06570dd644ef46d09ac8c_2336	2cf5bec40a3ef4476bf46f509f729c16_3136	102e21fe2bbcace64a7555dd0bcc9007_3774	4a9cac2c1a817d9acdec143b653b9a80_4398	ac8fed72b32d7540cf9a1b9ac12df95a_3180	197b0243bc5bc4c380ecfb8919a026b1_3260	79ccbe49faa72747a800162f6a36c0ca_4408	614e29224da4f337b8899b3142d81070_3591	d977e7edc1a56720a787e465ab4ce472_3186	e653c257947c2dd0a414de7cb159ba14_2647	31e4ba73e5ddb8c85dea419204f0df5a_4312	752b3971131f3206662b5e22da3b23aa_4498	83683a6c7ca473684645e0830a47223d_3496	03da1bd30b32560bef8e38ea7761d9fe_2889	c648bd7c3a222aa51bed3e3836bcf8c8_5046	B9T21_04930.p01	B9T15_07065.p01	B9T14_07035.p01	B9T11_02820.p01	B9T12_07800.p01	B9T18_05515.p01	B9T13_05740.p01	F387_00626.p01	A6V30_09885.p01
J7602_07575		AEC family transporter	26	26	1	1	2728				947	947	947	B9T10_04890.p01	BMY_0814.p01	a04b031c37c06570dd644ef46d09ac8c_6263	2cf5bec40a3ef4476bf46f509f729c16_5761	102e21fe2bbcace64a7555dd0bcc9007_5278	4a9cac2c1a817d9acdec143b653b9a80_5312	ac8fed72b32d7540cf9a1b9ac12df95a_2145	197b0243bc5bc4c380ecfb8919a026b1_5372	79ccbe49faa72747a800162f6a36c0ca_2544	614e29224da4f337b8899b3142d81070_5889	d977e7edc1a56720a787e465ab4ce472_6011	e653c257947c2dd0a414de7cb159ba14_5996	31e4ba73e5ddb8c85dea419204f0df5a_5548	752b3971131f3206662b5e22da3b23aa_1787	83683a6c7ca473684645e0830a47223d_6676	03da1bd30b32560bef8e38ea7761d9fe_5644	c648bd7c3a222aa51bed3e3836bcf8c8_178	B9T21_07740.p01	B9T15_00220.p01	B9T14_04805.p01	B9T11_06145.p01	B9T12_03530.p01	B9T18_00220.p01	B9T13_08815.p01	F387_01581.p01	A6V30_05715.p01
J7622_05450		type III pantothenate kinase	26	26	1	1	926				743	743	743	B9T10_08325.p01	BMY_1071.p01	a04b031c37c06570dd644ef46d09ac8c_1824	2cf5bec40a3ef4476bf46f509f729c16_1820	102e21fe2bbcace64a7555dd0bcc9007_2356	4a9cac2c1a817d9acdec143b653b9a80_2727	ac8fed72b32d7540cf9a1b9ac12df95a_2659	197b0243bc5bc4c380ecfb8919a026b1_1867	79ccbe49faa72747a800162f6a36c0ca_3054	614e29224da4f337b8899b3142d81070_2866	d977e7edc1a56720a787e465ab4ce472_3989	e653c257947c2dd0a414de7cb159ba14_3972	31e4ba73e5ddb8c85dea419204f0df5a_2877	752b3971131f3206662b5e22da3b23aa_3164	83683a6c7ca473684645e0830a47223d_4326	03da1bd30b32560bef8e38ea7761d9fe_2356	c648bd7c3a222aa51bed3e3836bcf8c8_5878	B9T21_05580.p01	B9T15_08110.p01	B9T14_08080.p01	B9T11_07325.p01	B9T12_05490.p01	B9T18_08160.p01	B9T13_06775.p01	F387_00543.p01	A6V30_00655.p01
J7552_08755		uroporphyrinogen decarboxylase	26	26	1	1	3041				1058	1058	1058	B9T10_09895.p01	BMY_1327.p01	a04b031c37c06570dd644ef46d09ac8c_6483	2cf5bec40a3ef4476bf46f509f729c16_6406	102e21fe2bbcace64a7555dd0bcc9007_6575	4a9cac2c1a817d9acdec143b653b9a80_6603	ac8fed72b32d7540cf9a1b9ac12df95a_6230	197b0243bc5bc4c380ecfb8919a026b1_6952	79ccbe49faa72747a800162f6a36c0ca_6057	614e29224da4f337b8899b3142d81070_6480	d977e7edc1a56720a787e465ab4ce472_6717	e653c257947c2dd0a414de7cb159ba14_6706	31e4ba73e5ddb8c85dea419204f0df5a_6311	752b3971131f3206662b5e22da3b23aa_6110	83683a6c7ca473684645e0830a47223d_7004	03da1bd30b32560bef8e38ea7761d9fe_6257	c648bd7c3a222aa51bed3e3836bcf8c8_6476	B9T21_08155.p01	B9T15_09285.p01	B9T14_09255.p01	B9T11_09405.p01	B9T12_09120.p01	B9T18_09335.p01	B9T13_09230.p01	F387_01325.p01	A6V30_06130.p01
J7552_01920		NCS2 family permease	26	26	1	1	1016				1301	1301	1301	B9T10_08760.p01	BMY_0982.p01	a04b031c37c06570dd644ef46d09ac8c_1482	2cf5bec40a3ef4476bf46f509f729c16_2160	102e21fe2bbcace64a7555dd0bcc9007_2702	4a9cac2c1a817d9acdec143b653b9a80_3073	ac8fed72b32d7540cf9a1b9ac12df95a_3001	197b0243bc5bc4c380ecfb8919a026b1_1525	79ccbe49faa72747a800162f6a36c0ca_3398	614e29224da4f337b8899b3142d81070_2524	d977e7edc1a56720a787e465ab4ce472_3647	e653c257947c2dd0a414de7cb159ba14_3630	31e4ba73e5ddb8c85dea419204f0df5a_2535	752b3971131f3206662b5e22da3b23aa_3510	83683a6c7ca473684645e0830a47223d_4668	03da1bd30b32560bef8e38ea7761d9fe_2698	c648bd7c3a222aa51bed3e3836bcf8c8_5540	B9T21_06010.p01	B9T15_08540.p01	B9T14_08510.p01	B9T11_06895.p01	B9T12_05920.p01	B9T18_08600.p01	B9T13_07205.p01	F387_00452.p01	A6V30_01085.p01
J7558_03500		iron chelate uptake ABC transporter family permease subunit	26	26	1	1	3576				947	947	947	B9T10_06640.p01	BMY_1682.p01	a04b031c37c06570dd644ef46d09ac8c_2785	2cf5bec40a3ef4476bf46f509f729c16_2703	102e21fe2bbcace64a7555dd0bcc9007_3329	4a9cac2c1a817d9acdec143b653b9a80_3953	ac8fed72b32d7540cf9a1b9ac12df95a_3627	197b0243bc5bc4c380ecfb8919a026b1_2829	79ccbe49faa72747a800162f6a36c0ca_3976	614e29224da4f337b8899b3142d81070_4022	d977e7edc1a56720a787e465ab4ce472_2755	e653c257947c2dd0a414de7cb159ba14_3078	31e4ba73e5ddb8c85dea419204f0df5a_3879	752b3971131f3206662b5e22da3b23aa_4053	83683a6c7ca473684645e0830a47223d_3065	03da1bd30b32560bef8e38ea7761d9fe_3338	c648bd7c3a222aa51bed3e3836bcf8c8_4601	B9T21_04380.p01	B9T15_06515.p01	B9T14_06485.p01	B9T11_03370.p01	B9T12_07265.p01	B9T18_06050.p01	B9T13_05190.p01	F387_00738.p01	A6V30_09350.p01
group_3199	ccsA	cytochrome c biogenesis protein CcsA	26	26	1	1	1002				740	740	740	B9T10_08690.p01	BMY_0996.p01	a04b031c37c06570dd644ef46d09ac8c_1538	2cf5bec40a3ef4476bf46f509f729c16_2104	102e21fe2bbcace64a7555dd0bcc9007_2646	4a9cac2c1a817d9acdec143b653b9a80_3017	ac8fed72b32d7540cf9a1b9ac12df95a_2945	197b0243bc5bc4c380ecfb8919a026b1_1581	79ccbe49faa72747a800162f6a36c0ca_3342	614e29224da4f337b8899b3142d81070_2580	d977e7edc1a56720a787e465ab4ce472_3703	e653c257947c2dd0a414de7cb159ba14_3686	31e4ba73e5ddb8c85dea419204f0df5a_2591	752b3971131f3206662b5e22da3b23aa_3454	83683a6c7ca473684645e0830a47223d_4612	03da1bd30b32560bef8e38ea7761d9fe_2642	c648bd7c3a222aa51bed3e3836bcf8c8_5592	B9T21_05940.p01	B9T15_08470.p01	B9T14_08440.p01	B9T11_06965.p01	B9T12_05850.p01	B9T18_08530.p01	B9T13_07135.p01	F387_00466.p01	A6V30_01015.p01
J7560_05325		class I SAM-dependent methyltransferase	26	26	1	1	236				704	704	704	B9T10_05410.p01	BMY_1434.p01	a04b031c37c06570dd644ef46d09ac8c_3744	2cf5bec40a3ef4476bf46f509f729c16_4228	102e21fe2bbcace64a7555dd0bcc9007_4697	4a9cac2c1a817d9acdec143b653b9a80_5010	ac8fed72b32d7540cf9a1b9ac12df95a_5757	197b0243bc5bc4c380ecfb8919a026b1_4429	79ccbe49faa72747a800162f6a36c0ca_4699	614e29224da4f337b8899b3142d81070_4949	d977e7edc1a56720a787e465ab4ce472_4753	e653c257947c2dd0a414de7cb159ba14_5048	31e4ba73e5ddb8c85dea419204f0df5a_5846	752b3971131f3206662b5e22da3b23aa_4776	83683a6c7ca473684645e0830a47223d_5064	03da1bd30b32560bef8e38ea7761d9fe_5023	c648bd7c3a222aa51bed3e3836bcf8c8_3689	B9T21_03175.p01	B9T15_05330.p01	B9T14_05315.p01	B9T11_04550.p01	B9T12_08130.p01	B9T18_07255.p01	B9T13_03905.p01	F387_01387.p01	A6V30_08035.p01
pnp		polyribonucleotide nucleotidyltransferase	26	26	1	1	879				2099	2099	2099	B9T10_08105.p01	BMY_1118.p01	a04b031c37c06570dd644ef46d09ac8c_2004	2cf5bec40a3ef4476bf46f509f729c16_1640	102e21fe2bbcace64a7555dd0bcc9007_2176	4a9cac2c1a817d9acdec143b653b9a80_2547	ac8fed72b32d7540cf9a1b9ac12df95a_2479	197b0243bc5bc4c380ecfb8919a026b1_2047	79ccbe49faa72747a800162f6a36c0ca_2874	614e29224da4f337b8899b3142d81070_3046	d977e7edc1a56720a787e465ab4ce472_4169	e653c257947c2dd0a414de7cb159ba14_4152	31e4ba73e5ddb8c85dea419204f0df5a_3057	752b3971131f3206662b5e22da3b23aa_2984	83683a6c7ca473684645e0830a47223d_4146	03da1bd30b32560bef8e38ea7761d9fe_2176	c648bd7c3a222aa51bed3e3836bcf8c8_6054	B9T21_05360.p01	B9T15_07890.p01	B9T14_07860.p01	B9T11_07545.p01	B9T12_05270.p01	B9T18_07940.p01	B9T13_06555.p01	F387_00588.p01	A6V30_00440.p01
gyrA		DNA gyrase subunit A	26	26	1	1	896				2609	2609	2609	B9T10_08180.p01	BMY_1101.p01	a04b031c37c06570dd644ef46d09ac8c_1940	2cf5bec40a3ef4476bf46f509f729c16_1704	102e21fe2bbcace64a7555dd0bcc9007_2240	4a9cac2c1a817d9acdec143b653b9a80_2611	ac8fed72b32d7540cf9a1b9ac12df95a_2543	197b0243bc5bc4c380ecfb8919a026b1_1983	79ccbe49faa72747a800162f6a36c0ca_2938	614e29224da4f337b8899b3142d81070_2982	d977e7edc1a56720a787e465ab4ce472_4105	e653c257947c2dd0a414de7cb159ba14_4088	31e4ba73e5ddb8c85dea419204f0df5a_2993	752b3971131f3206662b5e22da3b23aa_3048	83683a6c7ca473684645e0830a47223d_4210	03da1bd30b32560bef8e38ea7761d9fe_2240	c648bd7c3a222aa51bed3e3836bcf8c8_5994	B9T21_05435.p01	B9T15_07965.p01	B9T14_07935.p01	B9T11_07470.p01	B9T12_05345.p01	B9T18_08015.p01	B9T13_06630.p01	F387_00572.p01	A6V30_00510.p01
ettA		energy-dependent translational throttle protein EttA	26	26	1	1	3004				1667	1667	1667	B9T10_10065.p01	BMY_1364.p01	a04b031c37c06570dd644ef46d09ac8c_6349	2cf5bec40a3ef4476bf46f509f729c16_6553	102e21fe2bbcace64a7555dd0bcc9007_6710	4a9cac2c1a817d9acdec143b653b9a80_6739	ac8fed72b32d7540cf9a1b9ac12df95a_6364	197b0243bc5bc4c380ecfb8919a026b1_6808	79ccbe49faa72747a800162f6a36c0ca_5921	614e29224da4f337b8899b3142d81070_6337	d977e7edc1a56720a787e465ab4ce472_6861	e653c257947c2dd0a414de7cb159ba14_6849	31e4ba73e5ddb8c85dea419204f0df5a_6175	752b3971131f3206662b5e22da3b23aa_5967	83683a6c7ca473684645e0830a47223d_6861	03da1bd30b32560bef8e38ea7761d9fe_6122	c648bd7c3a222aa51bed3e3836bcf8c8_6341	B9T21_07985.p01	B9T15_09105.p01	B9T14_09075.p01	B9T11_09585.p01	B9T12_09290.p01	B9T18_09165.p01	B9T13_09050.p01	F387_01361.p01	A6V30_05960.p01
J7552_08965		Glu/Leu/Phe/Val dehydrogenase	26	26	1	1	444				1289	1289	1289	B9T10_07535.p01	BMY_1847.p01	a04b031c37c06570dd644ef46d09ac8c_7087	2cf5bec40a3ef4476bf46f509f729c16_7150	102e21fe2bbcace64a7555dd0bcc9007_7034	4a9cac2c1a817d9acdec143b653b9a80_7307	ac8fed72b32d7540cf9a1b9ac12df95a_6993	197b0243bc5bc4c380ecfb8919a026b1_7120	79ccbe49faa72747a800162f6a36c0ca_7609	614e29224da4f337b8899b3142d81070_7951	d977e7edc1a56720a787e465ab4ce472_3390	e653c257947c2dd0a414de7cb159ba14_2443	31e4ba73e5ddb8c85dea419204f0df5a_7785	752b3971131f3206662b5e22da3b23aa_6722	83683a6c7ca473684645e0830a47223d_3700	03da1bd30b32560bef8e38ea7761d9fe_7074	c648bd7c3a222aa51bed3e3836bcf8c8_7445	B9T21_09520.p01	B9T15_07375.p01	B9T14_07345.p01	B9T11_09715.p01	B9T12_09420.p01	B9T18_05225.p01	B9T13_06035.p01	F387_01862.p01	A6V30_07530.p01
J7553_02905		DASS family sodium-coupled anion symporter	26	26	1	1	779				1478	1478	1478	B9T10_07765.p01	BMY_1176.p01	a04b031c37c06570dd644ef46d09ac8c_2175	2cf5bec40a3ef4476bf46f509f729c16_1393	102e21fe2bbcace64a7555dd0bcc9007_1881	4a9cac2c1a817d9acdec143b653b9a80_6346	ac8fed72b32d7540cf9a1b9ac12df95a_2308	197b0243bc5bc4c380ecfb8919a026b1_2266	79ccbe49faa72747a800162f6a36c0ca_2699	614e29224da4f337b8899b3142d81070_3315	d977e7edc1a56720a787e465ab4ce472_4438	e653c257947c2dd0a414de7cb159ba14_4421	31e4ba73e5ddb8c85dea419204f0df5a_3320	752b3971131f3206662b5e22da3b23aa_2749	83683a6c7ca473684645e0830a47223d_3877	03da1bd30b32560bef8e38ea7761d9fe_1965	c648bd7c3a222aa51bed3e3836bcf8c8_6229	B9T21_05130.p01	B9T15_07595.p01	B9T14_07565.p01	B9T11_09970.p01	B9T12_05005.p01	B9T18_07665.p01	B9T13_06260.p01	F387_01795.p01	A6V30_00125.p01
proP		glycine betaine/L-proline transporter ProP	26	26	1	1	1176				1496	1496	1496	B9T10_00095.p01	BMY_1896.p01	a04b031c37c06570dd644ef46d09ac8c_7612	2cf5bec40a3ef4476bf46f509f729c16_7370	102e21fe2bbcace64a7555dd0bcc9007_7332	4a9cac2c1a817d9acdec143b653b9a80_7109	ac8fed72b32d7540cf9a1b9ac12df95a_7495	197b0243bc5bc4c380ecfb8919a026b1_4082	79ccbe49faa72747a800162f6a36c0ca_7165	614e29224da4f337b8899b3142d81070_7629	d977e7edc1a56720a787e465ab4ce472_7751	e653c257947c2dd0a414de7cb159ba14_7743	31e4ba73e5ddb8c85dea419204f0df5a_7179	752b3971131f3206662b5e22da3b23aa_7157	83683a6c7ca473684645e0830a47223d_7902	03da1bd30b32560bef8e38ea7761d9fe_7379	c648bd7c3a222aa51bed3e3836bcf8c8_7000	B9T21_00095.p01	B9T15_04945.p01	B9T14_00095.p01	B9T11_02650.p01	B9T12_00090.p01	B9T18_05025.p01	B9T13_00095.p01	F387_00854.p01	A6V30_01735.p01
rpoH		RNA polymerase sigma factor RpoH	26	26	1	1	3520				866	866	866	B9T10_06875.p01	BMY_1731.p01	a04b031c37c06570dd644ef46d09ac8c_2576	2cf5bec40a3ef4476bf46f509f729c16_2896	102e21fe2bbcace64a7555dd0bcc9007_3534	4a9cac2c1a817d9acdec143b653b9a80_4158	ac8fed72b32d7540cf9a1b9ac12df95a_3419	197b0243bc5bc4c380ecfb8919a026b1_3020	79ccbe49faa72747a800162f6a36c0ca_4168	614e29224da4f337b8899b3142d81070_3831	d977e7edc1a56720a787e465ab4ce472_2946	e653c257947c2dd0a414de7cb159ba14_2887	31e4ba73e5ddb8c85dea419204f0df5a_4072	752b3971131f3206662b5e22da3b23aa_4258	83683a6c7ca473684645e0830a47223d_3256	03da1bd30b32560bef8e38ea7761d9fe_3129	c648bd7c3a222aa51bed3e3836bcf8c8_4806	B9T21_04630.p01	B9T15_06765.p01	B9T14_06735.p01	B9T11_03120.p01	B9T12_07500.p01	B9T18_05815.p01	B9T13_05440.p01	F387_00686.p01	A6V30_09585.p01
rlmE		23S rRNA (uridine(2552)-2'-O)-methyltransferase RlmE	26	26	1	1	1012				635	635	635	B9T10_08740.p01	BMY_0986.p01	a04b031c37c06570dd644ef46d09ac8c_1498	2cf5bec40a3ef4476bf46f509f729c16_2144	102e21fe2bbcace64a7555dd0bcc9007_2686	4a9cac2c1a817d9acdec143b653b9a80_3057	ac8fed72b32d7540cf9a1b9ac12df95a_2985	197b0243bc5bc4c380ecfb8919a026b1_1541	79ccbe49faa72747a800162f6a36c0ca_3382	614e29224da4f337b8899b3142d81070_2540	d977e7edc1a56720a787e465ab4ce472_3663	e653c257947c2dd0a414de7cb159ba14_3646	31e4ba73e5ddb8c85dea419204f0df5a_2551	752b3971131f3206662b5e22da3b23aa_3494	83683a6c7ca473684645e0830a47223d_4652	03da1bd30b32560bef8e38ea7761d9fe_2682	c648bd7c3a222aa51bed3e3836bcf8c8_5556	B9T21_05990.p01	B9T15_08520.p01	B9T14_08490.p01	B9T11_06915.p01	B9T12_05900.p01	B9T18_08580.p01	B9T13_07185.p01	F387_00456.p01	A6V30_01065.p01
BMY_1040		hypothetical protein	26	26	1	1	956				716	716	716	B9T10_08480.p01	BMY_1040.p01	a04b031c37c06570dd644ef46d09ac8c_1703	2cf5bec40a3ef4476bf46f509f729c16_1941	102e21fe2bbcace64a7555dd0bcc9007_2477	4a9cac2c1a817d9acdec143b653b9a80_2848	ac8fed72b32d7540cf9a1b9ac12df95a_2780	197b0243bc5bc4c380ecfb8919a026b1_1746	79ccbe49faa72747a800162f6a36c0ca_3175	614e29224da4f337b8899b3142d81070_2745	d977e7edc1a56720a787e465ab4ce472_3868	e653c257947c2dd0a414de7cb159ba14_3851	31e4ba73e5ddb8c85dea419204f0df5a_2756	752b3971131f3206662b5e22da3b23aa_3285	83683a6c7ca473684645e0830a47223d_4447	03da1bd30b32560bef8e38ea7761d9fe_2477	c648bd7c3a222aa51bed3e3836bcf8c8_5757	B9T21_05735.p01	B9T15_08265.p01	B9T14_08235.p01	B9T11_07170.p01	B9T12_05645.p01	B9T18_08315.p01	B9T13_06930.p01	F387_00512.p01	A6V30_00810.p01
A6V30_09825		response regulator transcription factor	26	26	1	1	3469				680	680	680	B9T10_07115.p01	BMY_1782.p01	a04b031c37c06570dd644ef46d09ac8c_2384	2cf5bec40a3ef4476bf46f509f729c16_3088	102e21fe2bbcace64a7555dd0bcc9007_3726	4a9cac2c1a817d9acdec143b653b9a80_4350	ac8fed72b32d7540cf9a1b9ac12df95a_3228	197b0243bc5bc4c380ecfb8919a026b1_3212	79ccbe49faa72747a800162f6a36c0ca_4360	614e29224da4f337b8899b3142d81070_3639	d977e7edc1a56720a787e465ab4ce472_3138	e653c257947c2dd0a414de7cb159ba14_2695	31e4ba73e5ddb8c85dea419204f0df5a_4264	752b3971131f3206662b5e22da3b23aa_4450	83683a6c7ca473684645e0830a47223d_3448	03da1bd30b32560bef8e38ea7761d9fe_2937	c648bd7c3a222aa51bed3e3836bcf8c8_4998	B9T21_04870.p01	B9T15_07005.p01	B9T14_06975.p01	B9T11_02880.p01	B9T12_07740.p01	B9T18_05575.p01	B9T13_05680.p01	F387_00638.p01	A6V30_09825.p01
J7602_05275		bifunctional (p)ppGpp synthetase/guanosine-3',5'-bis(diphosphate) 3'-pyrophosphohydrolase	26	26	1	1	874				2198	2216	2198	B9T10_08080.p01	BMY_1123.p01	a04b031c37c06570dd644ef46d09ac8c_2024	2cf5bec40a3ef4476bf46f509f729c16_1620	102e21fe2bbcace64a7555dd0bcc9007_2156	4a9cac2c1a817d9acdec143b653b9a80_2527	ac8fed72b32d7540cf9a1b9ac12df95a_2459	197b0243bc5bc4c380ecfb8919a026b1_2067	79ccbe49faa72747a800162f6a36c0ca_2854	614e29224da4f337b8899b3142d81070_3066	d977e7edc1a56720a787e465ab4ce472_4189	e653c257947c2dd0a414de7cb159ba14_4172	31e4ba73e5ddb8c85dea419204f0df5a_3077	752b3971131f3206662b5e22da3b23aa_2964	83683a6c7ca473684645e0830a47223d_4126	03da1bd30b32560bef8e38ea7761d9fe_2156	c648bd7c3a222aa51bed3e3836bcf8c8_6074	B9T21_05335.p01	B9T15_07865.p01	B9T14_07835.p01	B9T11_07570.p01	B9T12_05245.p01	B9T18_07915.p01	B9T13_06530.p01	F387_00593.p01	A6V30_00415.p01
J7547_05405		Bax inhibitor-1 family protein	26	26	1	1	1270				701	701	701	B9T10_00480.p01	BMY_1977.p01	a04b031c37c06570dd644ef46d09ac8c_5107	2cf5bec40a3ef4476bf46f509f729c16_3366	102e21fe2bbcace64a7555dd0bcc9007_4305	4a9cac2c1a817d9acdec143b653b9a80_2302	ac8fed72b32d7540cf9a1b9ac12df95a_5312	197b0243bc5bc4c380ecfb8919a026b1_3789	79ccbe49faa72747a800162f6a36c0ca_5725	614e29224da4f337b8899b3142d81070_5332	d977e7edc1a56720a787e465ab4ce472_5453	e653c257947c2dd0a414de7cb159ba14_5436	31e4ba73e5ddb8c85dea419204f0df5a_4963	752b3971131f3206662b5e22da3b23aa_5480	83683a6c7ca473684645e0830a47223d_6094	03da1bd30b32560bef8e38ea7761d9fe_4373	c648bd7c3a222aa51bed3e3836bcf8c8_3434	B9T21_00475.p01	B9T15_04570.p01	B9T14_00470.p01	B9T11_02275.p01	B9T12_00490.p01	B9T18_04625.p01	B9T13_00470.p01	F387_00931.p01	A6V30_02110.p01
J7554_03690		iron ABC transporter permease	26	26	1	1	894				968	968	968	B9T10_08170.p01	BMY_1103.p01	a04b031c37c06570dd644ef46d09ac8c_1948	2cf5bec40a3ef4476bf46f509f729c16_1696	102e21fe2bbcace64a7555dd0bcc9007_2232	4a9cac2c1a817d9acdec143b653b9a80_2603	ac8fed72b32d7540cf9a1b9ac12df95a_2535	197b0243bc5bc4c380ecfb8919a026b1_1991	79ccbe49faa72747a800162f6a36c0ca_2930	614e29224da4f337b8899b3142d81070_2990	d977e7edc1a56720a787e465ab4ce472_4113	e653c257947c2dd0a414de7cb159ba14_4096	31e4ba73e5ddb8c85dea419204f0df5a_3001	752b3971131f3206662b5e22da3b23aa_3040	83683a6c7ca473684645e0830a47223d_4202	03da1bd30b32560bef8e38ea7761d9fe_2232	c648bd7c3a222aa51bed3e3836bcf8c8_6002	B9T21_05425.p01	B9T15_07955.p01	B9T14_07925.p01	B9T11_07480.p01	B9T12_05335.p01	B9T18_08005.p01	B9T13_06620.p01	F387_00574.p01	A6V30_00500.p01
B9T11_03390		hypothetical protein	26	26	1	1	3580				602	602	602	B9T10_06620.p01	BMY_1678.p01	a04b031c37c06570dd644ef46d09ac8c_2801	2cf5bec40a3ef4476bf46f509f729c16_2687	102e21fe2bbcace64a7555dd0bcc9007_3313	4a9cac2c1a817d9acdec143b653b9a80_3937	ac8fed72b32d7540cf9a1b9ac12df95a_3643	197b0243bc5bc4c380ecfb8919a026b1_2813	79ccbe49faa72747a800162f6a36c0ca_3960	614e29224da4f337b8899b3142d81070_4038	d977e7edc1a56720a787e465ab4ce472_2739	e653c257947c2dd0a414de7cb159ba14_3094	31e4ba73e5ddb8c85dea419204f0df5a_3863	752b3971131f3206662b5e22da3b23aa_4037	83683a6c7ca473684645e0830a47223d_3049	03da1bd30b32560bef8e38ea7761d9fe_3354	c648bd7c3a222aa51bed3e3836bcf8c8_4585	B9T21_04360.p01	B9T15_06495.p01	B9T14_06465.p01	B9T11_03390.p01	B9T12_07245.p01	B9T18_06070.p01	B9T13_05170.p01	F387_00742.p01	A6V30_09330.p01
B9T21_04700		MetQ/NlpA family ABC transporter substrate-binding protein	26	26	1	1	3506				773	773	773	B9T10_06945.p01	BMY_1747.p01	a04b031c37c06570dd644ef46d09ac8c_2520	2cf5bec40a3ef4476bf46f509f729c16_2952	102e21fe2bbcace64a7555dd0bcc9007_3590	4a9cac2c1a817d9acdec143b653b9a80_4214	ac8fed72b32d7540cf9a1b9ac12df95a_3363	197b0243bc5bc4c380ecfb8919a026b1_3076	79ccbe49faa72747a800162f6a36c0ca_4224	614e29224da4f337b8899b3142d81070_3775	d977e7edc1a56720a787e465ab4ce472_3002	e653c257947c2dd0a414de7cb159ba14_2831	31e4ba73e5ddb8c85dea419204f0df5a_4128	752b3971131f3206662b5e22da3b23aa_4314	83683a6c7ca473684645e0830a47223d_3312	03da1bd30b32560bef8e38ea7761d9fe_3073	c648bd7c3a222aa51bed3e3836bcf8c8_4862	B9T21_04700.p01	B9T15_06835.p01	B9T14_06805.p01	B9T11_03050.p01	B9T12_07570.p01	B9T18_05745.p01	B9T13_05510.p01	F387_00672.p01	A6V30_09655.p01
B9T15_07480		AI-2E family transporter	26	26	1	1	423				1175	1175	1175	B9T10_07640.p01	BMY_1868.p01	a04b031c37c06570dd644ef46d09ac8c_7003	2cf5bec40a3ef4476bf46f509f729c16_7069	102e21fe2bbcace64a7555dd0bcc9007_6952	4a9cac2c1a817d9acdec143b653b9a80_7390	ac8fed72b32d7540cf9a1b9ac12df95a_6912	197b0243bc5bc4c380ecfb8919a026b1_7036	79ccbe49faa72747a800162f6a36c0ca_7693	614e29224da4f337b8899b3142d81070_7867	d977e7edc1a56720a787e465ab4ce472_3474	e653c257947c2dd0a414de7cb159ba14_2359	31e4ba73e5ddb8c85dea419204f0df5a_7701	752b3971131f3206662b5e22da3b23aa_6639	83683a6c7ca473684645e0830a47223d_3784	03da1bd30b32560bef8e38ea7761d9fe_6992	c648bd7c3a222aa51bed3e3836bcf8c8_7529	B9T21_09625.p01	B9T15_07480.p01	B9T14_07450.p01	B9T11_09610.p01	B9T12_09315.p01	B9T18_05120.p01	B9T13_06140.p01	F387_01841.p01	A6V30_07425.p01
J7606_05245		cupin domain-containing protein	26	26	1	1	876				1217	1217	1217	B9T10_08090.p01	BMY_1121.p01	a04b031c37c06570dd644ef46d09ac8c_2016	2cf5bec40a3ef4476bf46f509f729c16_1628	102e21fe2bbcace64a7555dd0bcc9007_2164	4a9cac2c1a817d9acdec143b653b9a80_2535	ac8fed72b32d7540cf9a1b9ac12df95a_2467	197b0243bc5bc4c380ecfb8919a026b1_2059	79ccbe49faa72747a800162f6a36c0ca_2862	614e29224da4f337b8899b3142d81070_3058	d977e7edc1a56720a787e465ab4ce472_4181	e653c257947c2dd0a414de7cb159ba14_4164	31e4ba73e5ddb8c85dea419204f0df5a_3069	752b3971131f3206662b5e22da3b23aa_2972	83683a6c7ca473684645e0830a47223d_4134	03da1bd30b32560bef8e38ea7761d9fe_2164	c648bd7c3a222aa51bed3e3836bcf8c8_6066	B9T21_05345.p01	B9T15_07875.p01	B9T14_07845.p01	B9T11_07560.p01	B9T12_05255.p01	B9T18_07925.p01	B9T13_06540.p01	F387_00591.p01	A6V30_00425.p01
J7561_05215		NADP-dependent malic enzyme	26	26	1	1	3521				2321	2321	2321	B9T10_06870.p01	BMY_1730.p01	a04b031c37c06570dd644ef46d09ac8c_2580	2cf5bec40a3ef4476bf46f509f729c16_2892	102e21fe2bbcace64a7555dd0bcc9007_3530	4a9cac2c1a817d9acdec143b653b9a80_4154	ac8fed72b32d7540cf9a1b9ac12df95a_3423	197b0243bc5bc4c380ecfb8919a026b1_3016	79ccbe49faa72747a800162f6a36c0ca_4164	614e29224da4f337b8899b3142d81070_3835	d977e7edc1a56720a787e465ab4ce472_2942	e653c257947c2dd0a414de7cb159ba14_2891	31e4ba73e5ddb8c85dea419204f0df5a_4068	752b3971131f3206662b5e22da3b23aa_4254	83683a6c7ca473684645e0830a47223d_3252	03da1bd30b32560bef8e38ea7761d9fe_3133	c648bd7c3a222aa51bed3e3836bcf8c8_4802	B9T21_04625.p01	B9T15_06760.p01	B9T14_06730.p01	B9T11_03125.p01	B9T12_07495.p01	B9T18_05820.p01	B9T13_05435.p01	F387_00687.p01	A6V30_09580.p01
grpE		nucleotide exchange factor GrpE	26	26	1	1	426				569	569	569	B9T10_07625.p01	BMY_1865.p01	a04b031c37c06570dd644ef46d09ac8c_7015	2cf5bec40a3ef4476bf46f509f729c16_7080	102e21fe2bbcace64a7555dd0bcc9007_6964	4a9cac2c1a817d9acdec143b653b9a80_7378	ac8fed72b32d7540cf9a1b9ac12df95a_6924	197b0243bc5bc4c380ecfb8919a026b1_7048	79ccbe49faa72747a800162f6a36c0ca_7681	614e29224da4f337b8899b3142d81070_7879	d977e7edc1a56720a787e465ab4ce472_3462	e653c257947c2dd0a414de7cb159ba14_2371	31e4ba73e5ddb8c85dea419204f0df5a_7713	752b3971131f3206662b5e22da3b23aa_6651	83683a6c7ca473684645e0830a47223d_3772	03da1bd30b32560bef8e38ea7761d9fe_7004	c648bd7c3a222aa51bed3e3836bcf8c8_7517	B9T21_09610.p01	B9T15_07465.p01	B9T14_07435.p01	B9T11_09625.p01	B9T12_09330.p01	B9T18_05135.p01	B9T13_06125.p01	F387_01844.p01	A6V30_07440.p01
J7602_08630		ABC transporter permease	26	26	1	1	3007				1130	1130	1130	B9T10_10050.p01	BMY_1361.p01	a04b031c37c06570dd644ef46d09ac8c_6361	2cf5bec40a3ef4476bf46f509f729c16_6541	102e21fe2bbcace64a7555dd0bcc9007_6698	4a9cac2c1a817d9acdec143b653b9a80_6727	ac8fed72b32d7540cf9a1b9ac12df95a_6352	197b0243bc5bc4c380ecfb8919a026b1_6820	79ccbe49faa72747a800162f6a36c0ca_5933	614e29224da4f337b8899b3142d81070_6349	d977e7edc1a56720a787e465ab4ce472_6849	e653c257947c2dd0a414de7cb159ba14_6837	31e4ba73e5ddb8c85dea419204f0df5a_6187	752b3971131f3206662b5e22da3b23aa_5979	83683a6c7ca473684645e0830a47223d_6873	03da1bd30b32560bef8e38ea7761d9fe_6134	c648bd7c3a222aa51bed3e3836bcf8c8_6353	B9T21_08000.p01	B9T15_09120.p01	B9T14_09090.p01	B9T11_09570.p01	B9T12_09275.p01	B9T18_09180.p01	B9T13_09065.p01	F387_01358.p01	A6V30_05975.p01
J7561_08135		peptidyl-prolyl cis-trans isomerase	26	26	1	1	3159				500	500	500	B9T10_09760.p01	BMY_1300.p01	a04b031c37c06570dd644ef46d09ac8c_6590	2cf5bec40a3ef4476bf46f509f729c16_6299	102e21fe2bbcace64a7555dd0bcc9007_6442	4a9cac2c1a817d9acdec143b653b9a80_6472	ac8fed72b32d7540cf9a1b9ac12df95a_6122	197b0243bc5bc4c380ecfb8919a026b1_7349	79ccbe49faa72747a800162f6a36c0ca_6165	614e29224da4f337b8899b3142d81070_6628	d977e7edc1a56720a787e465ab4ce472_6571	e653c257947c2dd0a414de7cb159ba14_6558	31e4ba73e5ddb8c85dea419204f0df5a_6419	752b3971131f3206662b5e22da3b23aa_6218	83683a6c7ca473684645e0830a47223d_7150	03da1bd30b32560bef8e38ea7761d9fe_6364	c648bd7c3a222aa51bed3e3836bcf8c8_6583	B9T21_08290.p01	B9T15_09420.p01	B9T14_09390.p01	B9T11_09270.p01	B9T12_08525.p01	B9T18_09520.p01	B9T13_09365.p01	F387_01298.p01	A6V30_06265.p01
J7600_04280		ABC transporter permease	26	26	1	1	754				1196	1196	1196	B9T10_07655.p01	BMY_1199.p01	a04b031c37c06570dd644ef46d09ac8c_2268	2cf5bec40a3ef4476bf46f509f729c16_1304	102e21fe2bbcace64a7555dd0bcc9007_1800	4a9cac2c1a817d9acdec143b653b9a80_6427	ac8fed72b32d7540cf9a1b9ac12df95a_2223	197b0243bc5bc4c380ecfb8919a026b1_2355	79ccbe49faa72747a800162f6a36c0ca_2618	614e29224da4f337b8899b3142d81070_3396	d977e7edc1a56720a787e465ab4ce472_4519	e653c257947c2dd0a414de7cb159ba14_4502	31e4ba73e5ddb8c85dea419204f0df5a_3409	752b3971131f3206662b5e22da3b23aa_2656	83683a6c7ca473684645e0830a47223d_3796	03da1bd30b32560bef8e38ea7761d9fe_1872	c648bd7c3a222aa51bed3e3836bcf8c8_6310	B9T21_05020.p01	B9T15_07495.p01	B9T14_07465.p01	B9T11_10070.p01	B9T12_04905.p01	B9T18_07565.p01	B9T13_06160.p01	F387_01774.p01	A6V30_00020.p01
carB		carbamoyl-phosphate synthase large subunit	26	26	1	1	2831				3218	3218	3218	B9T10_04450.p01	BMY_0721.p01	a04b031c37c06570dd644ef46d09ac8c_5920	2cf5bec40a3ef4476bf46f509f729c16_6105	102e21fe2bbcace64a7555dd0bcc9007_5669	4a9cac2c1a817d9acdec143b653b9a80_5705	ac8fed72b32d7540cf9a1b9ac12df95a_1801	197b0243bc5bc4c380ecfb8919a026b1_4977	79ccbe49faa72747a800162f6a36c0ca_2196	614e29224da4f337b8899b3142d81070_6278	d977e7edc1a56720a787e465ab4ce472_6400	e653c257947c2dd0a414de7cb159ba14_6387	31e4ba73e5ddb8c85dea419204f0df5a_5161	752b3971131f3206662b5e22da3b23aa_2130	83683a6c7ca473684645e0830a47223d_6286	03da1bd30b32560bef8e38ea7761d9fe_5301	c648bd7c3a222aa51bed3e3836bcf8c8_525	B9T21_07230.p01	B9T15_00660.p01	B9T14_04370.p01	B9T11_05710.p01	B9T12_03970.p01	B9T18_00655.p01	B9T13_08385.p01	F387_01669.p01	A6V30_05280.p01
grxD		Grx4 family monothiol glutaredoxin	26	26	1	1	2871				332	332	332	B9T10_04335.p01	BMY_0693.p01	a04b031c37c06570dd644ef46d09ac8c_7825	2cf5bec40a3ef4476bf46f509f729c16_5365	102e21fe2bbcace64a7555dd0bcc9007_5819	4a9cac2c1a817d9acdec143b653b9a80_5871	ac8fed72b32d7540cf9a1b9ac12df95a_1701	197b0243bc5bc4c380ecfb8919a026b1_6252	79ccbe49faa72747a800162f6a36c0ca_2100	614e29224da4f337b8899b3142d81070_7027	d977e7edc1a56720a787e465ab4ce472_6924	e653c257947c2dd0a414de7cb159ba14_6915	31e4ba73e5ddb8c85dea419204f0df5a_47	752b3971131f3206662b5e22da3b23aa_2222	83683a6c7ca473684645e0830a47223d_47	03da1bd30b32560bef8e38ea7761d9fe_7919	c648bd7c3a222aa51bed3e3836bcf8c8_621	B9T21_07105.p01	B9T15_00785.p01	B9T14_04245.p01	B9T11_05585.p01	B9T12_04095.p01	B9T18_00770.p01	B9T13_08260.p01	F387_01749.p01	A6V30_05160.p01
argB		acetylglutamate kinase	26	26	1	1	954				896	896	896	B9T10_08470.p01	BMY_1042.p01	a04b031c37c06570dd644ef46d09ac8c_1711	2cf5bec40a3ef4476bf46f509f729c16_1933	102e21fe2bbcace64a7555dd0bcc9007_2469	4a9cac2c1a817d9acdec143b653b9a80_2840	ac8fed72b32d7540cf9a1b9ac12df95a_2772	197b0243bc5bc4c380ecfb8919a026b1_1754	79ccbe49faa72747a800162f6a36c0ca_3167	614e29224da4f337b8899b3142d81070_2753	d977e7edc1a56720a787e465ab4ce472_3876	e653c257947c2dd0a414de7cb159ba14_3859	31e4ba73e5ddb8c85dea419204f0df5a_2764	752b3971131f3206662b5e22da3b23aa_3277	83683a6c7ca473684645e0830a47223d_4439	03da1bd30b32560bef8e38ea7761d9fe_2469	c648bd7c3a222aa51bed3e3836bcf8c8_5765	B9T21_05725.p01	B9T15_08255.p01	B9T14_08225.p01	B9T11_07180.p01	B9T12_05635.p01	B9T18_08305.p01	B9T13_06920.p01	F387_00514.p01	A6V30_00800.p01
groL		chaperonin GroEL	26	26	1	1	764				1631	1640	1639	B9T10_07695.p01	BMY_1189.p01	a04b031c37c06570dd644ef46d09ac8c_2236	2cf5bec40a3ef4476bf46f509f729c16_1336	102e21fe2bbcace64a7555dd0bcc9007_1832	4a9cac2c1a817d9acdec143b653b9a80_6395	ac8fed72b32d7540cf9a1b9ac12df95a_2255	197b0243bc5bc4c380ecfb8919a026b1_2323	79ccbe49faa72747a800162f6a36c0ca_2650	614e29224da4f337b8899b3142d81070_3364	d977e7edc1a56720a787e465ab4ce472_4487	e653c257947c2dd0a414de7cb159ba14_4470	31e4ba73e5ddb8c85dea419204f0df5a_3377	752b3971131f3206662b5e22da3b23aa_2688	83683a6c7ca473684645e0830a47223d_3828	03da1bd30b32560bef8e38ea7761d9fe_1904	c648bd7c3a222aa51bed3e3836bcf8c8_6278	B9T21_05060.p01	B9T15_07535.p01	B9T14_07505.p01	B9T11_10030.p01	B9T12_04945.p01	B9T18_07605.p01	B9T13_06200.p01	F387_01783.p01	A6V30_00060.p01
rplM		50S ribosomal protein L13	26	26	1	1	2690				428	428	428	B9T10_05070.p01	BMY_0855.p01	a04b031c37c06570dd644ef46d09ac8c_7757	2cf5bec40a3ef4476bf46f509f729c16_7524	102e21fe2bbcace64a7555dd0bcc9007_7612	4a9cac2c1a817d9acdec143b653b9a80_7604	ac8fed72b32d7540cf9a1b9ac12df95a_7643	197b0243bc5bc4c380ecfb8919a026b1_7709	79ccbe49faa72747a800162f6a36c0ca_7465	614e29224da4f337b8899b3142d81070_7788	d977e7edc1a56720a787e465ab4ce472_7909	e653c257947c2dd0a414de7cb159ba14_7900	31e4ba73e5ddb8c85dea419204f0df5a_7673	752b3971131f3206662b5e22da3b23aa_7487	83683a6c7ca473684645e0830a47223d_6818	03da1bd30b32560bef8e38ea7761d9fe_7849	c648bd7c3a222aa51bed3e3836bcf8c8_30	B9T21_07925.p01	B9T15_00045.p01	B9T14_04980.p01	B9T11_06320.p01	B9T12_03355.p01	B9T18_00040.p01	B9T13_08990.p01	F387_01543.p01	A6V30_05900.p01
J7600_04620		lysophospholipid acyltransferase family protein	26	26	1	1	3475				917	917	917	B9T10_07085.p01	BMY_1776.p01	a04b031c37c06570dd644ef46d09ac8c_2408	2cf5bec40a3ef4476bf46f509f729c16_3064	102e21fe2bbcace64a7555dd0bcc9007_3702	4a9cac2c1a817d9acdec143b653b9a80_4326	ac8fed72b32d7540cf9a1b9ac12df95a_3252	197b0243bc5bc4c380ecfb8919a026b1_3188	79ccbe49faa72747a800162f6a36c0ca_4336	614e29224da4f337b8899b3142d81070_3663	d977e7edc1a56720a787e465ab4ce472_3114	e653c257947c2dd0a414de7cb159ba14_2719	31e4ba73e5ddb8c85dea419204f0df5a_4240	752b3971131f3206662b5e22da3b23aa_4426	83683a6c7ca473684645e0830a47223d_3424	03da1bd30b32560bef8e38ea7761d9fe_2961	c648bd7c3a222aa51bed3e3836bcf8c8_4974	B9T21_04840.p01	B9T15_06975.p01	B9T14_06945.p01	B9T11_02910.p01	B9T12_07710.p01	B9T18_05605.p01	B9T13_05650.p01	F387_00644.p01	A6V30_09795.p01
gyrB		DNA topoisomerase (ATP-hydrolyzing) subunit B	26	26	1	1	3210				2408	2408	2408	B9T10_09800.p01	BMY_1308.p01	a04b031c37c06570dd644ef46d09ac8c_6558	2cf5bec40a3ef4476bf46f509f729c16_6331	102e21fe2bbcace64a7555dd0bcc9007_6500	4a9cac2c1a817d9acdec143b653b9a80_6529	ac8fed72b32d7540cf9a1b9ac12df95a_6154	197b0243bc5bc4c380ecfb8919a026b1_7028	79ccbe49faa72747a800162f6a36c0ca_6133	614e29224da4f337b8899b3142d81070_6556	d977e7edc1a56720a787e465ab4ce472_6642	e653c257947c2dd0a414de7cb159ba14_6630	31e4ba73e5ddb8c85dea419204f0df5a_6387	752b3971131f3206662b5e22da3b23aa_6186	83683a6c7ca473684645e0830a47223d_7080	03da1bd30b32560bef8e38ea7761d9fe_6332	c648bd7c3a222aa51bed3e3836bcf8c8_6551	B9T21_08250.p01	B9T15_09380.p01	B9T14_09350.p01	B9T11_09310.p01	B9T12_09025.p01	B9T18_09430.p01	B9T13_09325.p01	F387_01306.p01	A6V30_06225.p01
rluA		bifunctional tRNA pseudouridine(32) synthase/23S rRNA pseudouridine(746) synthase RluA	26	26	1	1	2826				659	659	659	B9T10_04475.p01	BMY_0726.p01	a04b031c37c06570dd644ef46d09ac8c_5936	2cf5bec40a3ef4476bf46f509f729c16_6085	102e21fe2bbcace64a7555dd0bcc9007_5649	4a9cac2c1a817d9acdec143b653b9a80_5685	ac8fed72b32d7540cf9a1b9ac12df95a_1817	197b0243bc5bc4c380ecfb8919a026b1_4996	79ccbe49faa72747a800162f6a36c0ca_2212	614e29224da4f337b8899b3142d81070_6262	d977e7edc1a56720a787e465ab4ce472_6384	e653c257947c2dd0a414de7cb159ba14_6371	31e4ba73e5ddb8c85dea419204f0df5a_5181	752b3971131f3206662b5e22da3b23aa_2114	83683a6c7ca473684645e0830a47223d_6301	03da1bd30b32560bef8e38ea7761d9fe_5317	c648bd7c3a222aa51bed3e3836bcf8c8_505	B9T21_07255.p01	B9T15_00635.p01	B9T14_04395.p01	B9T11_05735.p01	B9T12_03950.p01	B9T18_00635.p01	B9T13_08405.p01	F387_01664.p01	A6V30_05300.p01
B9T13_00890		RNA-binding transcriptional accessory protein	26	26	1	1	1354				2261	2261	2261	B9T10_00875.p01	BMY_2060.p01	a04b031c37c06570dd644ef46d09ac8c_4792	2cf5bec40a3ef4476bf46f509f729c16_3684	102e21fe2bbcace64a7555dd0bcc9007_3968	4a9cac2c1a817d9acdec143b653b9a80_1964	ac8fed72b32d7540cf9a1b9ac12df95a_4991	197b0243bc5bc4c380ecfb8919a026b1_3471	79ccbe49faa72747a800162f6a36c0ca_5405	614e29224da4f337b8899b3142d81070_5668	d977e7edc1a56720a787e465ab4ce472_5790	e653c257947c2dd0a414de7cb159ba14_5774	31e4ba73e5ddb8c85dea419204f0df5a_4550	752b3971131f3206662b5e22da3b23aa_5798	83683a6c7ca473684645e0830a47223d_5756	03da1bd30b32560bef8e38ea7761d9fe_4056	c648bd7c3a222aa51bed3e3836bcf8c8_3116	B9T21_00870.p01	B9T15_04150.p01	B9T14_00890.p01	B9T11_01855.p01	B9T12_00885.p01	B9T18_04220.p01	B9T13_00890.p01	F387_01011.p01	A6V30_02505.p01
J7624_06535		Hpt domain-containing protein	26	26	1	1	152				4886	4886	4886	B9T10_05180.p01	BMY_1386.p01	a04b031c37c06570dd644ef46d09ac8c_3923	2cf5bec40a3ef4476bf46f509f729c16_4048	102e21fe2bbcace64a7555dd0bcc9007_4515	4a9cac2c1a817d9acdec143b653b9a80_5193	ac8fed72b32d7540cf9a1b9ac12df95a_5939	197b0243bc5bc4c380ecfb8919a026b1_4202	79ccbe49faa72747a800162f6a36c0ca_4520	614e29224da4f337b8899b3142d81070_5128	d977e7edc1a56720a787e465ab4ce472_4575	e653c257947c2dd0a414de7cb159ba14_5227	31e4ba73e5ddb8c85dea419204f0df5a_5664	752b3971131f3206662b5e22da3b23aa_4594	83683a6c7ca473684645e0830a47223d_4885	03da1bd30b32560bef8e38ea7761d9fe_5201	c648bd7c3a222aa51bed3e3836bcf8c8_3510	B9T21_02945.p01	B9T15_05100.p01	B9T14_05085.p01	B9T11_04780.p01	B9T12_07900.p01	B9T18_07485.p01	B9T13_03675.p01	F387_01920.p01	A6V30_07335.p01
ddpX		D-alanyl-D-alanine dipeptidase	26	26	1	1	2929				557	557	557	B9T10_04175.p01	BMY_0660.p01	a04b031c37c06570dd644ef46d09ac8c_5784	2cf5bec40a3ef4476bf46f509f729c16_5503	102e21fe2bbcace64a7555dd0bcc9007_5944	4a9cac2c1a817d9acdec143b653b9a80_5998	ac8fed72b32d7540cf9a1b9ac12df95a_1574	197b0243bc5bc4c380ecfb8919a026b1_6126	79ccbe49faa72747a800162f6a36c0ca_1961	614e29224da4f337b8899b3142d81070_6900	d977e7edc1a56720a787e465ab4ce472_7051	e653c257947c2dd0a414de7cb159ba14_7041	31e4ba73e5ddb8c85dea419204f0df5a_174	752b3971131f3206662b5e22da3b23aa_2349	83683a6c7ca473684645e0830a47223d_174	03da1bd30b32560bef8e38ea7761d9fe_5798	c648bd7c3a222aa51bed3e3836bcf8c8_748	B9T21_06930.p01	B9T15_00960.p01	B9T14_04070.p01	B9T11_05410.p01	B9T12_04270.p01	B9T18_00930.p01	B9T13_08085.p01	F387_01714.p01	A6V30_05000.p01
B9T10_07970		superoxide dismutase	26	26	1	1	855				614	614	614	B9T10_07970.p01	BMY_1145.p01	a04b031c37c06570dd644ef46d09ac8c_2108	2cf5bec40a3ef4476bf46f509f729c16_1536	102e21fe2bbcace64a7555dd0bcc9007_2072	4a9cac2c1a817d9acdec143b653b9a80_6156	ac8fed72b32d7540cf9a1b9ac12df95a_2375	197b0243bc5bc4c380ecfb8919a026b1_2151	79ccbe49faa72747a800162f6a36c0ca_2770	614e29224da4f337b8899b3142d81070_3150	d977e7edc1a56720a787e465ab4ce472_4273	e653c257947c2dd0a414de7cb159ba14_4256	31e4ba73e5ddb8c85dea419204f0df5a_3161	752b3971131f3206662b5e22da3b23aa_2880	83683a6c7ca473684645e0830a47223d_4042	03da1bd30b32560bef8e38ea7761d9fe_2072	c648bd7c3a222aa51bed3e3836bcf8c8_6158	B9T21_05225.p01	B9T15_07755.p01	B9T14_07725.p01	B9T11_07680.p01	B9T12_05135.p01	B9T18_07805.p01	B9T13_06420.p01	F387_01833.p01	A6V30_00305.p01
atpG		F0F1 ATP synthase subunit gamma	26	26	1	1	175				911	911	911	B9T10_05275.p01	BMY_1405.p01	a04b031c37c06570dd644ef46d09ac8c_3847	2cf5bec40a3ef4476bf46f509f729c16_4121	102e21fe2bbcace64a7555dd0bcc9007_4591	4a9cac2c1a817d9acdec143b653b9a80_5117	ac8fed72b32d7540cf9a1b9ac12df95a_5863	197b0243bc5bc4c380ecfb8919a026b1_4278	79ccbe49faa72747a800162f6a36c0ca_4596	614e29224da4f337b8899b3142d81070_5052	d977e7edc1a56720a787e465ab4ce472_4651	e653c257947c2dd0a414de7cb159ba14_5151	31e4ba73e5ddb8c85dea419204f0df5a_5740	752b3971131f3206662b5e22da3b23aa_4670	83683a6c7ca473684645e0830a47223d_4961	03da1bd30b32560bef8e38ea7761d9fe_5125	c648bd7c3a222aa51bed3e3836bcf8c8_3586	B9T21_03040.p01	B9T15_05195.p01	B9T14_05180.p01	B9T11_04685.p01	B9T12_07995.p01	B9T18_07390.p01	B9T13_03770.p01	F387_01939.p01	A6V30_07240.p01
B143_RS0107210		hypothetical protein	26	26	1	1	984				1094	1094	1094	B9T10_08600.p01	BMY_1014.p01	a04b031c37c06570dd644ef46d09ac8c_1606	2cf5bec40a3ef4476bf46f509f729c16_2036	102e21fe2bbcace64a7555dd0bcc9007_2574	4a9cac2c1a817d9acdec143b653b9a80_2945	ac8fed72b32d7540cf9a1b9ac12df95a_2877	197b0243bc5bc4c380ecfb8919a026b1_1649	79ccbe49faa72747a800162f6a36c0ca_3270	614e29224da4f337b8899b3142d81070_2648	d977e7edc1a56720a787e465ab4ce472_3771	e653c257947c2dd0a414de7cb159ba14_3754	31e4ba73e5ddb8c85dea419204f0df5a_2659	752b3971131f3206662b5e22da3b23aa_3382	83683a6c7ca473684645e0830a47223d_4544	03da1bd30b32560bef8e38ea7761d9fe_2574	c648bd7c3a222aa51bed3e3836bcf8c8_5660	B9T21_05855.p01	B9T15_08385.p01	B9T14_08355.p01	B9T11_07050.p01	B9T12_05765.p01	B9T18_08435.p01	B9T13_07050.p01	F387_00486.p01	A6V30_00930.p01
trpD		anthranilate phosphoribosyltransferase	26	26	1	1	1240				1007	1007	1007	B9T10_00400.p01	BMY_1959.p01	a04b031c37c06570dd644ef46d09ac8c_5163	2cf5bec40a3ef4476bf46f509f729c16_3301	102e21fe2bbcace64a7555dd0bcc9007_4362	4a9cac2c1a817d9acdec143b653b9a80_2359	ac8fed72b32d7540cf9a1b9ac12df95a_5369	197b0243bc5bc4c380ecfb8919a026b1_3846	79ccbe49faa72747a800162f6a36c0ca_5806	614e29224da4f337b8899b3142d81070_5275	d977e7edc1a56720a787e465ab4ce472_5396	e653c257947c2dd0a414de7cb159ba14_5379	31e4ba73e5ddb8c85dea419204f0df5a_5020	752b3971131f3206662b5e22da3b23aa_5423	83683a6c7ca473684645e0830a47223d_6151	03da1bd30b32560bef8e38ea7761d9fe_4438	c648bd7c3a222aa51bed3e3836bcf8c8_7240	B9T21_00405.p01	B9T15_04640.p01	B9T14_00400.p01	B9T11_02345.p01	B9T12_00390.p01	B9T18_04725.p01	B9T13_00400.p01	F387_00916.p01	A6V30_02040.p01
putP		sodium/proline symporter PutP	26	26	1	1	1076				1562	1562	1562	B9T10_09070.p01	BMY_0918.p01	a04b031c37c06570dd644ef46d09ac8c_6923	2cf5bec40a3ef4476bf46f509f729c16_6866	102e21fe2bbcace64a7555dd0bcc9007_6159	4a9cac2c1a817d9acdec143b653b9a80_3318	ac8fed72b32d7540cf9a1b9ac12df95a_6460	197b0243bc5bc4c380ecfb8919a026b1_6714	79ccbe49faa72747a800162f6a36c0ca_6590	614e29224da4f337b8899b3142d81070_7271	d977e7edc1a56720a787e465ab4ce472_7390	e653c257947c2dd0a414de7cb159ba14_7383	31e4ba73e5ddb8c85dea419204f0df5a_6752	752b3971131f3206662b5e22da3b23aa_6428	83683a6c7ca473684645e0830a47223d_7358	03da1bd30b32560bef8e38ea7761d9fe_6791	c648bd7c3a222aa51bed3e3836bcf8c8_5307	B9T21_06315.p01	B9T15_08835.p01	B9T14_08805.p01	B9T11_06600.p01	B9T12_06230.p01	B9T18_08895.p01	B9T13_07500.p01	F387_00394.p01	A6V30_01375.p01
J7561_08755		hypothetical protein	26	26	1	1	3120				311	311	311	B9T10_09565.p01	BMY_1258.p01	a04b031c37c06570dd644ef46d09ac8c_7285	2cf5bec40a3ef4476bf46f509f729c16_6768	102e21fe2bbcace64a7555dd0bcc9007_6929	4a9cac2c1a817d9acdec143b653b9a80_6956	ac8fed72b32d7540cf9a1b9ac12df95a_7340	197b0243bc5bc4c380ecfb8919a026b1_6317	79ccbe49faa72747a800162f6a36c0ca_6318	614e29224da4f337b8899b3142d81070_7368	d977e7edc1a56720a787e465ab4ce472_7665	e653c257947c2dd0a414de7cb159ba14_7656	31e4ba73e5ddb8c85dea419204f0df5a_6851	752b3971131f3206662b5e22da3b23aa_6898	83683a6c7ca473684645e0830a47223d_7578	03da1bd30b32560bef8e38ea7761d9fe_6518	c648bd7c3a222aa51bed3e3836bcf8c8_6734	B9T21_08485.p01	B9T15_09615.p01	B9T14_09585.p01	B9T11_09075.p01	B9T12_08720.p01	B9T18_09710.p01	B9T13_09560.p01	F387_01260.p01	A6V30_06455.p01
glyA		serine hydroxymethyltransferase	26	26	1	1	2835				1250	1250	1250	B9T10_04435.p01	BMY_0717.p01	a04b031c37c06570dd644ef46d09ac8c_5909	2cf5bec40a3ef4476bf46f509f729c16_6117	102e21fe2bbcace64a7555dd0bcc9007_5681	4a9cac2c1a817d9acdec143b653b9a80_5717	ac8fed72b32d7540cf9a1b9ac12df95a_1789	197b0243bc5bc4c380ecfb8919a026b1_4965	79ccbe49faa72747a800162f6a36c0ca_2184	614e29224da4f337b8899b3142d81070_6290	d977e7edc1a56720a787e465ab4ce472_6412	e653c257947c2dd0a414de7cb159ba14_6399	31e4ba73e5ddb8c85dea419204f0df5a_5149	752b3971131f3206662b5e22da3b23aa_2142	83683a6c7ca473684645e0830a47223d_6274	03da1bd30b32560bef8e38ea7761d9fe_5289	c648bd7c3a222aa51bed3e3836bcf8c8_537	B9T21_07215.p01	B9T15_00675.p01	B9T14_04355.p01	B9T11_05695.p01	B9T12_03985.p01	B9T18_00670.p01	B9T13_08370.p01	F387_01672.p01	A6V30_05265.p01
J7560_02155		MarC family NAAT transporter	26	26	1	1	897				659	665	664	B9T10_08185.p01	BMY_1100.p01	a04b031c37c06570dd644ef46d09ac8c_1936	2cf5bec40a3ef4476bf46f509f729c16_1708	102e21fe2bbcace64a7555dd0bcc9007_2244	4a9cac2c1a817d9acdec143b653b9a80_2615	ac8fed72b32d7540cf9a1b9ac12df95a_2547	197b0243bc5bc4c380ecfb8919a026b1_1979	79ccbe49faa72747a800162f6a36c0ca_2942	614e29224da4f337b8899b3142d81070_2978	d977e7edc1a56720a787e465ab4ce472_4101	e653c257947c2dd0a414de7cb159ba14_4084	31e4ba73e5ddb8c85dea419204f0df5a_2989	752b3971131f3206662b5e22da3b23aa_3052	83683a6c7ca473684645e0830a47223d_4214	03da1bd30b32560bef8e38ea7761d9fe_2244	c648bd7c3a222aa51bed3e3836bcf8c8_5990	B9T21_05440.p01	B9T15_07970.p01	B9T14_07940.p01	B9T11_07465.p01	B9T12_05350.p01	B9T18_08020.p01	B9T13_06635.p01	F387_00571.p01	A6V30_00515.p01
F387_00511		adenylate kinase	26	26	1	1	957				542	542	542	B9T10_08485.p01	BMY_1039.p01	a04b031c37c06570dd644ef46d09ac8c_1699	2cf5bec40a3ef4476bf46f509f729c16_1945	102e21fe2bbcace64a7555dd0bcc9007_2481	4a9cac2c1a817d9acdec143b653b9a80_2852	ac8fed72b32d7540cf9a1b9ac12df95a_2784	197b0243bc5bc4c380ecfb8919a026b1_1742	79ccbe49faa72747a800162f6a36c0ca_3179	614e29224da4f337b8899b3142d81070_2741	d977e7edc1a56720a787e465ab4ce472_3864	e653c257947c2dd0a414de7cb159ba14_3847	31e4ba73e5ddb8c85dea419204f0df5a_2752	752b3971131f3206662b5e22da3b23aa_3289	83683a6c7ca473684645e0830a47223d_4451	03da1bd30b32560bef8e38ea7761d9fe_2481	c648bd7c3a222aa51bed3e3836bcf8c8_5753	B9T21_05740.p01	B9T15_08270.p01	B9T14_08240.p01	B9T11_07165.p01	B9T12_05650.p01	B9T18_08320.p01	B9T13_06935.p01	F387_00511.p01	A6V30_00815.p01
clpB		ATP-dependent chaperone ClpB	26	26	1	1	3134				2603	2603	2603	B9T10_09650.p01	BMY_1275.p01	a04b031c37c06570dd644ef46d09ac8c_6679	2cf5bec40a3ef4476bf46f509f729c16_6211	102e21fe2bbcace64a7555dd0bcc9007_7442	4a9cac2c1a817d9acdec143b653b9a80_7435	ac8fed72b32d7540cf9a1b9ac12df95a_6033	197b0243bc5bc4c380ecfb8919a026b1_7438	79ccbe49faa72747a800162f6a36c0ca_6253	614e29224da4f337b8899b3142d81070_6716	d977e7edc1a56720a787e465ab4ce472_6482	e653c257947c2dd0a414de7cb159ba14_6469	31e4ba73e5ddb8c85dea419204f0df5a_6508	752b3971131f3206662b5e22da3b23aa_6307	83683a6c7ca473684645e0830a47223d_7237	03da1bd30b32560bef8e38ea7761d9fe_6453	c648bd7c3a222aa51bed3e3836bcf8c8_6669	B9T21_08400.p01	B9T15_09530.p01	B9T14_09500.p01	B9T11_09160.p01	B9T12_08635.p01	B9T18_09630.p01	B9T13_09475.p01	F387_01276.p01	A6V30_06375.p01
B143_RS0106355		pseudouridine synthase	26	26	1	1	3471				1040	1040	1040	B9T10_07105.p01	BMY_1780.p01	a04b031c37c06570dd644ef46d09ac8c_2392	2cf5bec40a3ef4476bf46f509f729c16_3080	102e21fe2bbcace64a7555dd0bcc9007_3718	4a9cac2c1a817d9acdec143b653b9a80_4342	ac8fed72b32d7540cf9a1b9ac12df95a_3236	197b0243bc5bc4c380ecfb8919a026b1_3204	79ccbe49faa72747a800162f6a36c0ca_4352	614e29224da4f337b8899b3142d81070_3647	d977e7edc1a56720a787e465ab4ce472_3130	e653c257947c2dd0a414de7cb159ba14_2703	31e4ba73e5ddb8c85dea419204f0df5a_4256	752b3971131f3206662b5e22da3b23aa_4442	83683a6c7ca473684645e0830a47223d_3440	03da1bd30b32560bef8e38ea7761d9fe_2945	c648bd7c3a222aa51bed3e3836bcf8c8_4990	B9T21_04860.p01	B9T15_06995.p01	B9T14_06965.p01	B9T11_02890.p01	B9T12_07730.p01	B9T18_05585.p01	B9T13_05670.p01	F387_00640.p01	A6V30_09815.p01
J7620_05925		HlyD family efflux transporter periplasmic adaptor subunit	26	26	1	1	218				1223	1223	1223	B9T10_05320.p01	BMY_1416.p01	a04b031c37c06570dd644ef46d09ac8c_3812	2cf5bec40a3ef4476bf46f509f729c16_4156	102e21fe2bbcace64a7555dd0bcc9007_4625	4a9cac2c1a817d9acdec143b653b9a80_5082	ac8fed72b32d7540cf9a1b9ac12df95a_5829	197b0243bc5bc4c380ecfb8919a026b1_4313	79ccbe49faa72747a800162f6a36c0ca_4631	614e29224da4f337b8899b3142d81070_5017	d977e7edc1a56720a787e465ab4ce472_4685	e653c257947c2dd0a414de7cb159ba14_5116	31e4ba73e5ddb8c85dea419204f0df5a_5775	752b3971131f3206662b5e22da3b23aa_4705	83683a6c7ca473684645e0830a47223d_4996	03da1bd30b32560bef8e38ea7761d9fe_5090	c648bd7c3a222aa51bed3e3836bcf8c8_3621	B9T21_03085.p01	B9T15_05240.p01	B9T14_05225.p01	B9T11_04640.p01	B9T12_08040.p01	B9T18_07345.p01	B9T13_03815.p01	F387_01369.p01	A6V30_07950.p01
pheS		phenylalanine--tRNA ligase subunit alpha	26	26	1	1	1041				1013	1019	1016	B9T10_08880.p01	BMY_0957.p01	a04b031c37c06570dd644ef46d09ac8c_1398	2cf5bec40a3ef4476bf46f509f729c16_2244	102e21fe2bbcace64a7555dd0bcc9007_2798	4a9cac2c1a817d9acdec143b653b9a80_3169	ac8fed72b32d7540cf9a1b9ac12df95a_3085	197b0243bc5bc4c380ecfb8919a026b1_1433	79ccbe49faa72747a800162f6a36c0ca_3490	614e29224da4f337b8899b3142d81070_2428	d977e7edc1a56720a787e465ab4ce472_3551	e653c257947c2dd0a414de7cb159ba14_3534	31e4ba73e5ddb8c85dea419204f0df5a_2443	752b3971131f3206662b5e22da3b23aa_3594	83683a6c7ca473684645e0830a47223d_4764	03da1bd30b32560bef8e38ea7761d9fe_2782	c648bd7c3a222aa51bed3e3836bcf8c8_5456	B9T21_06125.p01	B9T15_08645.p01	B9T14_08615.p01	B9T11_06790.p01	B9T12_06040.p01	B9T18_08705.p01	B9T13_07310.p01	F387_00432.p01	A6V30_01185.p01
B9T14_00760		ABC transporter permease subunit	26	26	1	1	1324				686	686	686	B9T10_00750.p01	BMY_2035.p01	a04b031c37c06570dd644ef46d09ac8c_4893	2cf5bec40a3ef4476bf46f509f729c16_3582	102e21fe2bbcace64a7555dd0bcc9007_4074	4a9cac2c1a817d9acdec143b653b9a80_2070	ac8fed72b32d7540cf9a1b9ac12df95a_5097	197b0243bc5bc4c380ecfb8919a026b1_3573	79ccbe49faa72747a800162f6a36c0ca_5511	614e29224da4f337b8899b3142d81070_5563	d977e7edc1a56720a787e465ab4ce472_5684	e653c257947c2dd0a414de7cb159ba14_5668	31e4ba73e5ddb8c85dea419204f0df5a_4652	752b3971131f3206662b5e22da3b23aa_5696	83683a6c7ca473684645e0830a47223d_5862	03da1bd30b32560bef8e38ea7761d9fe_4158	c648bd7c3a222aa51bed3e3836bcf8c8_3218	B9T21_00745.p01	B9T15_04280.p01	B9T14_00760.p01	B9T11_01985.p01	B9T12_00760.p01	B9T18_04355.p01	B9T13_00760.p01	F387_00985.p01	A6V30_02380.p01
J7602_07160		transporter substrate-binding domain-containing protein	26	26	1	1	1323				737	737	737	B9T10_00745.p01	BMY_2034.p01	a04b031c37c06570dd644ef46d09ac8c_4897	2cf5bec40a3ef4476bf46f509f729c16_3578	102e21fe2bbcace64a7555dd0bcc9007_4078	4a9cac2c1a817d9acdec143b653b9a80_2074	ac8fed72b32d7540cf9a1b9ac12df95a_5101	197b0243bc5bc4c380ecfb8919a026b1_3577	79ccbe49faa72747a800162f6a36c0ca_5515	614e29224da4f337b8899b3142d81070_5559	d977e7edc1a56720a787e465ab4ce472_5680	e653c257947c2dd0a414de7cb159ba14_5664	31e4ba73e5ddb8c85dea419204f0df5a_4656	752b3971131f3206662b5e22da3b23aa_5692	83683a6c7ca473684645e0830a47223d_5866	03da1bd30b32560bef8e38ea7761d9fe_4162	c648bd7c3a222aa51bed3e3836bcf8c8_3222	B9T21_00740.p01	B9T15_04285.p01	B9T14_00755.p01	B9T11_01990.p01	B9T12_00755.p01	B9T18_04360.p01	B9T13_00755.p01	F387_00984.p01	A6V30_02375.p01
thrS		threonine--tRNA ligase	26	26	1	1	1037				1916	1916	1916	B9T10_08860.p01	BMY_0961.p01	a04b031c37c06570dd644ef46d09ac8c_1414	2cf5bec40a3ef4476bf46f509f729c16_2228	102e21fe2bbcace64a7555dd0bcc9007_2782	4a9cac2c1a817d9acdec143b653b9a80_3153	ac8fed72b32d7540cf9a1b9ac12df95a_3069	197b0243bc5bc4c380ecfb8919a026b1_1449	79ccbe49faa72747a800162f6a36c0ca_3474	614e29224da4f337b8899b3142d81070_2444	d977e7edc1a56720a787e465ab4ce472_3567	e653c257947c2dd0a414de7cb159ba14_3550	31e4ba73e5ddb8c85dea419204f0df5a_2459	752b3971131f3206662b5e22da3b23aa_3578	83683a6c7ca473684645e0830a47223d_4748	03da1bd30b32560bef8e38ea7761d9fe_2766	c648bd7c3a222aa51bed3e3836bcf8c8_5472	B9T21_06105.p01	B9T15_08625.p01	B9T14_08595.p01	B9T11_06810.p01	B9T12_06020.p01	B9T18_08685.p01	B9T13_07290.p01	F387_00435.p01	A6V30_01170.p01
J7600_05075		ATP-binding cassette domain-containing protein	26	26	1	1	3577				752	758	757	B9T10_06635.p01	BMY_1681.p01	a04b031c37c06570dd644ef46d09ac8c_2789	2cf5bec40a3ef4476bf46f509f729c16_2699	102e21fe2bbcace64a7555dd0bcc9007_3325	4a9cac2c1a817d9acdec143b653b9a80_3949	ac8fed72b32d7540cf9a1b9ac12df95a_3631	197b0243bc5bc4c380ecfb8919a026b1_2825	79ccbe49faa72747a800162f6a36c0ca_3972	614e29224da4f337b8899b3142d81070_4026	d977e7edc1a56720a787e465ab4ce472_2751	e653c257947c2dd0a414de7cb159ba14_3082	31e4ba73e5ddb8c85dea419204f0df5a_3875	752b3971131f3206662b5e22da3b23aa_4049	83683a6c7ca473684645e0830a47223d_3061	03da1bd30b32560bef8e38ea7761d9fe_3342	c648bd7c3a222aa51bed3e3836bcf8c8_4597	B9T21_04375.p01	B9T15_06510.p01	B9T14_06480.p01	B9T11_03375.p01	B9T12_07260.p01	B9T18_06055.p01	B9T13_05185.p01	F387_00739.p01	A6V30_09345.p01
J7620_08445		threonine synthase	26	26	1	1	442				1400	1412	1400	B9T10_07545.p01	BMY_1849.p01	a04b031c37c06570dd644ef46d09ac8c_7079	2cf5bec40a3ef4476bf46f509f729c16_7142	102e21fe2bbcace64a7555dd0bcc9007_7026	4a9cac2c1a817d9acdec143b653b9a80_7315	ac8fed72b32d7540cf9a1b9ac12df95a_6985	197b0243bc5bc4c380ecfb8919a026b1_7112	79ccbe49faa72747a800162f6a36c0ca_7617	614e29224da4f337b8899b3142d81070_7943	d977e7edc1a56720a787e465ab4ce472_3398	e653c257947c2dd0a414de7cb159ba14_2435	31e4ba73e5ddb8c85dea419204f0df5a_7777	752b3971131f3206662b5e22da3b23aa_6714	83683a6c7ca473684645e0830a47223d_3708	03da1bd30b32560bef8e38ea7761d9fe_7066	c648bd7c3a222aa51bed3e3836bcf8c8_7453	B9T21_09530.p01	B9T15_07385.p01	B9T14_07355.p01	B9T11_09705.p01	B9T12_09410.p01	B9T18_05215.p01	B9T13_06045.p01	F387_01860.p01	A6V30_07520.p01
raiA		ribosome-associated translation inhibitor RaiA	26	26	1	1	471				341	341	341	B9T10_07385.p01	BMY_1816.p01	a04b031c37c06570dd644ef46d09ac8c_7203	2cf5bec40a3ef4476bf46f509f729c16_7266	102e21fe2bbcace64a7555dd0bcc9007_7149	4a9cac2c1a817d9acdec143b653b9a80_7193	ac8fed72b32d7540cf9a1b9ac12df95a_7107	197b0243bc5bc4c380ecfb8919a026b1_7235	79ccbe49faa72747a800162f6a36c0ca_7284	614e29224da4f337b8899b3142d81070_3503	d977e7edc1a56720a787e465ab4ce472_3274	e653c257947c2dd0a414de7cb159ba14_2559	31e4ba73e5ddb8c85dea419204f0df5a_7539	752b3971131f3206662b5e22da3b23aa_6837	83683a6c7ca473684645e0830a47223d_3584	03da1bd30b32560bef8e38ea7761d9fe_7190	c648bd7c3a222aa51bed3e3836bcf8c8_7331	B9T21_09370.p01	B9T15_07225.p01	B9T14_07195.p01	B9T11_09865.p01	B9T12_09570.p01	B9T18_05375.p01	B9T13_05885.p01	F387_01892.p01	A6V30_07680.p01
lptB		LPS export ABC transporter ATP-binding protein	26	26	1	1	270				722	722	722	B9T10_05560.p01	BMY_1466.p01	a04b031c37c06570dd644ef46d09ac8c_3620	2cf5bec40a3ef4476bf46f509f729c16_4356	102e21fe2bbcace64a7555dd0bcc9007_4825	4a9cac2c1a817d9acdec143b653b9a80_4882	ac8fed72b32d7540cf9a1b9ac12df95a_5635	197b0243bc5bc4c380ecfb8919a026b1_4552	79ccbe49faa72747a800162f6a36c0ca_4819	614e29224da4f337b8899b3142d81070_4825	d977e7edc1a56720a787e465ab4ce472_4875	e653c257947c2dd0a414de7cb159ba14_4926	31e4ba73e5ddb8c85dea419204f0df5a_5970	752b3971131f3206662b5e22da3b23aa_4900	83683a6c7ca473684645e0830a47223d_5186	03da1bd30b32560bef8e38ea7761d9fe_4900	c648bd7c3a222aa51bed3e3836bcf8c8_3817	B9T21_03330.p01	B9T15_05485.p01	B9T14_05470.p01	B9T11_04395.p01	B9T12_08285.p01	B9T18_07100.p01	B9T13_04060.p01	F387_01419.p01	A6V30_08185.p01
rpiA		ribose-5-phosphate isomerase RpiA	26	26	1	1	267				659	659	659	B9T10_05545.p01	BMY_1463.p01	a04b031c37c06570dd644ef46d09ac8c_3632	2cf5bec40a3ef4476bf46f509f729c16_4344	102e21fe2bbcace64a7555dd0bcc9007_4813	4a9cac2c1a817d9acdec143b653b9a80_4894	ac8fed72b32d7540cf9a1b9ac12df95a_5646	197b0243bc5bc4c380ecfb8919a026b1_4540	79ccbe49faa72747a800162f6a36c0ca_4807	614e29224da4f337b8899b3142d81070_4837	d977e7edc1a56720a787e465ab4ce472_4863	e653c257947c2dd0a414de7cb159ba14_4938	31e4ba73e5ddb8c85dea419204f0df5a_5958	752b3971131f3206662b5e22da3b23aa_4888	83683a6c7ca473684645e0830a47223d_5174	03da1bd30b32560bef8e38ea7761d9fe_4912	c648bd7c3a222aa51bed3e3836bcf8c8_3805	B9T21_03315.p01	B9T15_05470.p01	B9T14_05455.p01	B9T11_04410.p01	B9T12_08270.p01	B9T18_07115.p01	B9T13_04045.p01	F387_01416.p01	A6V30_08170.p01
cyoD		cytochrome o ubiquinol oxidase subunit IV	26	26	1	1	2578				326	326	326	B9T10_04060.p01	BMY_0647.p01	a04b031c37c06570dd644ef46d09ac8c_5749	2cf5bec40a3ef4476bf46f509f729c16_5538	102e21fe2bbcace64a7555dd0bcc9007_5987	4a9cac2c1a817d9acdec143b653b9a80_6040	ac8fed72b32d7540cf9a1b9ac12df95a_1539	197b0243bc5bc4c380ecfb8919a026b1_6095	79ccbe49faa72747a800162f6a36c0ca_1916	614e29224da4f337b8899b3142d81070_6853	d977e7edc1a56720a787e465ab4ce472_7098	e653c257947c2dd0a414de7cb159ba14_7088	31e4ba73e5ddb8c85dea419204f0df5a_205	752b3971131f3206662b5e22da3b23aa_2396	83683a6c7ca473684645e0830a47223d_221	03da1bd30b32560bef8e38ea7761d9fe_5832	c648bd7c3a222aa51bed3e3836bcf8c8_811	B9T21_06865.p01	B9T15_01005.p01	B9T14_04025.p01	B9T11_05365.p01	B9T12_04325.p01	B9T18_01060.p01	B9T13_08040.p01	F387_01703.p01	A6V30_06760.p01
J7560_08765		type II secretion system F family protein	26	26	1	1	1095				1217	1217	1217	B9T10_09165.p01	BMY_0898.p01	a04b031c37c06570dd644ef46d09ac8c_6848	2cf5bec40a3ef4476bf46f509f729c16_6941	102e21fe2bbcace64a7555dd0bcc9007_6234	4a9cac2c1a817d9acdec143b653b9a80_3393	ac8fed72b32d7540cf9a1b9ac12df95a_6534	197b0243bc5bc4c380ecfb8919a026b1_6639	79ccbe49faa72747a800162f6a36c0ca_6664	614e29224da4f337b8899b3142d81070_7197	d977e7edc1a56720a787e465ab4ce472_7315	e653c257947c2dd0a414de7cb159ba14_7308	31e4ba73e5ddb8c85dea419204f0df5a_6677	752b3971131f3206662b5e22da3b23aa_6503	83683a6c7ca473684645e0830a47223d_7432	03da1bd30b32560bef8e38ea7761d9fe_6865	c648bd7c3a222aa51bed3e3836bcf8c8_5232	B9T21_06410.p01	B9T15_08930.p01	B9T14_08900.p01	B9T11_06505.p01	B9T12_06325.p01	B9T18_08990.p01	B9T13_07595.p01	F387_00375.p01	A6V30_01470.p01
hemL		glutamate-1-semialdehyde 2,1-aminomutase	26	26	1	1	3499				1283	1283	1283	B9T10_06980.p01	BMY_1754.p01	a04b031c37c06570dd644ef46d09ac8c_2492	2cf5bec40a3ef4476bf46f509f729c16_2980	102e21fe2bbcace64a7555dd0bcc9007_3618	4a9cac2c1a817d9acdec143b653b9a80_4242	ac8fed72b32d7540cf9a1b9ac12df95a_3336	197b0243bc5bc4c380ecfb8919a026b1_3104	79ccbe49faa72747a800162f6a36c0ca_4252	614e29224da4f337b8899b3142d81070_3747	d977e7edc1a56720a787e465ab4ce472_3030	e653c257947c2dd0a414de7cb159ba14_2803	31e4ba73e5ddb8c85dea419204f0df5a_4156	752b3971131f3206662b5e22da3b23aa_4342	83683a6c7ca473684645e0830a47223d_3340	03da1bd30b32560bef8e38ea7761d9fe_3045	c648bd7c3a222aa51bed3e3836bcf8c8_4890	B9T21_04735.p01	B9T15_06870.p01	B9T14_06840.p01	B9T11_03015.p01	B9T12_07605.p01	B9T18_05710.p01	B9T13_05545.p01	F387_00665.p01	A6V30_09690.p01
rng		ribonuclease G	26	26	1	1	3738				1523	1529	1523	B9T10_05925.p01	BMY_1534.p01	a04b031c37c06570dd644ef46d09ac8c_3358	2cf5bec40a3ef4476bf46f509f729c16_4601	102e21fe2bbcace64a7555dd0bcc9007_5096	4a9cac2c1a817d9acdec143b653b9a80_4611	ac8fed72b32d7540cf9a1b9ac12df95a_6778	197b0243bc5bc4c380ecfb8919a026b1_4826	79ccbe49faa72747a800162f6a36c0ca_5142	614e29224da4f337b8899b3142d81070_4523	d977e7edc1a56720a787e465ab4ce472_5178	e653c257947c2dd0a414de7cb159ba14_4624	31e4ba73e5ddb8c85dea419204f0df5a_7330	752b3971131f3206662b5e22da3b23aa_5207	83683a6c7ca473684645e0830a47223d_5489	03da1bd30b32560bef8e38ea7761d9fe_4654	c648bd7c3a222aa51bed3e3836bcf8c8_4104	B9T21_03665.p01	B9T15_05795.p01	B9T14_05765.p01	B9T11_04090.p01	B9T12_06645.p01	B9T18_06765.p01	B9T13_04415.p01	F387_01481.p01	A6V30_08635.p01
J7547_08960		UDP-3-O-acyl-N-acetylglucosamine deacetylase	26	26	1	1	461				926	926	926	B9T10_07435.p01	BMY_1827.p01	a04b031c37c06570dd644ef46d09ac8c_7163	2cf5bec40a3ef4476bf46f509f729c16_7226	102e21fe2bbcace64a7555dd0bcc9007_7109	4a9cac2c1a817d9acdec143b653b9a80_7233	ac8fed72b32d7540cf9a1b9ac12df95a_7069	197b0243bc5bc4c380ecfb8919a026b1_7195	79ccbe49faa72747a800162f6a36c0ca_7324	614e29224da4f337b8899b3142d81070_3463	d977e7edc1a56720a787e465ab4ce472_3314	e653c257947c2dd0a414de7cb159ba14_2519	31e4ba73e5ddb8c85dea419204f0df5a_7499	752b3971131f3206662b5e22da3b23aa_6797	83683a6c7ca473684645e0830a47223d_3624	03da1bd30b32560bef8e38ea7761d9fe_7150	c648bd7c3a222aa51bed3e3836bcf8c8_7370	B9T21_09420.p01	B9T15_07275.p01	B9T14_07245.p01	B9T11_09815.p01	B9T12_09520.p01	B9T18_05325.p01	B9T13_05935.p01	F387_01882.p01	A6V30_07630.p01
map		type I methionyl aminopeptidase	26	26	1	1	905				767	767	767	B9T10_08220.p01	BMY_1092.p01	a04b031c37c06570dd644ef46d09ac8c_1908	2cf5bec40a3ef4476bf46f509f729c16_1736	102e21fe2bbcace64a7555dd0bcc9007_2272	4a9cac2c1a817d9acdec143b653b9a80_2643	ac8fed72b32d7540cf9a1b9ac12df95a_2575	197b0243bc5bc4c380ecfb8919a026b1_1951	79ccbe49faa72747a800162f6a36c0ca_2970	614e29224da4f337b8899b3142d81070_2950	d977e7edc1a56720a787e465ab4ce472_4073	e653c257947c2dd0a414de7cb159ba14_4056	31e4ba73e5ddb8c85dea419204f0df5a_2961	752b3971131f3206662b5e22da3b23aa_3080	83683a6c7ca473684645e0830a47223d_4242	03da1bd30b32560bef8e38ea7761d9fe_2272	c648bd7c3a222aa51bed3e3836bcf8c8_5962	B9T21_05475.p01	B9T15_08005.p01	B9T14_07975.p01	B9T11_07430.p01	B9T12_05385.p01	B9T18_08055.p01	B9T13_06670.p01	F387_00564.p01	A6V30_00550.p01
mnmE		tRNA uridine-5-carboxymethylaminomethyl(34) synthesis GTPase MnmE	26	26	1	1	2794				1325	1328	1325	B9T10_04630.p01	BMY_0759.p01	a04b031c37c06570dd644ef46d09ac8c_6060	2cf5bec40a3ef4476bf46f509f729c16_5961	102e21fe2bbcace64a7555dd0bcc9007_5526	4a9cac2c1a817d9acdec143b653b9a80_5561	ac8fed72b32d7540cf9a1b9ac12df95a_1941	197b0243bc5bc4c380ecfb8919a026b1_5118	79ccbe49faa72747a800162f6a36c0ca_2340	614e29224da4f337b8899b3142d81070_6138	d977e7edc1a56720a787e465ab4ce472_6260	e653c257947c2dd0a414de7cb159ba14_6247	31e4ba73e5ddb8c85dea419204f0df5a_5305	752b3971131f3206662b5e22da3b23aa_1990	83683a6c7ca473684645e0830a47223d_6425	03da1bd30b32560bef8e38ea7761d9fe_5441	c648bd7c3a222aa51bed3e3836bcf8c8_381	B9T21_07415.p01	B9T15_00480.p01	B9T14_04550.p01	B9T11_05890.p01	B9T12_03795.p01	B9T18_00480.p01	B9T13_08560.p01	F387_01633.p01	A6V30_05460.p01
serA		phosphoglycerate dehydrogenase	26	26	1	1	441				1226	1226	1226	B9T10_07550.p01	BMY_1850.p01	a04b031c37c06570dd644ef46d09ac8c_7075	2cf5bec40a3ef4476bf46f509f729c16_7138	102e21fe2bbcace64a7555dd0bcc9007_7022	4a9cac2c1a817d9acdec143b653b9a80_7319	ac8fed72b32d7540cf9a1b9ac12df95a_6981	197b0243bc5bc4c380ecfb8919a026b1_7108	79ccbe49faa72747a800162f6a36c0ca_7621	614e29224da4f337b8899b3142d81070_7939	d977e7edc1a56720a787e465ab4ce472_3402	e653c257947c2dd0a414de7cb159ba14_2431	31e4ba73e5ddb8c85dea419204f0df5a_7773	752b3971131f3206662b5e22da3b23aa_6710	83683a6c7ca473684645e0830a47223d_3712	03da1bd30b32560bef8e38ea7761d9fe_7062	c648bd7c3a222aa51bed3e3836bcf8c8_7457	B9T21_09535.p01	B9T15_07390.p01	B9T14_07360.p01	B9T11_09700.p01	B9T12_09405.p01	B9T18_05210.p01	B9T13_06050.p01	F387_01859.p01	A6V30_07515.p01
infB		translation initiation factor IF-2	26	26	1	1	3115				2693	2696	2693	B9T10_09535.p01	BMY_1252.p01	a04b031c37c06570dd644ef46d09ac8c_7307	2cf5bec40a3ef4476bf46f509f729c16_6745	102e21fe2bbcace64a7555dd0bcc9007_6906	4a9cac2c1a817d9acdec143b653b9a80_6935	ac8fed72b32d7540cf9a1b9ac12df95a_7318	197b0243bc5bc4c380ecfb8919a026b1_6340	79ccbe49faa72747a800162f6a36c0ca_6341	614e29224da4f337b8899b3142d81070_7391	d977e7edc1a56720a787e465ab4ce472_7642	e653c257947c2dd0a414de7cb159ba14_7633	31e4ba73e5ddb8c85dea419204f0df5a_6873	752b3971131f3206662b5e22da3b23aa_6920	83683a6c7ca473684645e0830a47223d_7601	03da1bd30b32560bef8e38ea7761d9fe_6541	c648bd7c3a222aa51bed3e3836bcf8c8_6757	B9T21_08515.p01	B9T15_09645.p01	B9T14_09615.p01	B9T11_09045.p01	B9T12_08750.p01	B9T18_09740.p01	B9T13_09590.p01	F387_01254.p01	A6V30_06485.p01
J7554_05880		pirin family protein	26	26	1	1	229				767	767	767	B9T10_05375.p01	BMY_1427.p01	a04b031c37c06570dd644ef46d09ac8c_3772	2cf5bec40a3ef4476bf46f509f729c16_4200	102e21fe2bbcace64a7555dd0bcc9007_4669	4a9cac2c1a817d9acdec143b653b9a80_5038	ac8fed72b32d7540cf9a1b9ac12df95a_5785	197b0243bc5bc4c380ecfb8919a026b1_4357	79ccbe49faa72747a800162f6a36c0ca_4671	614e29224da4f337b8899b3142d81070_4977	d977e7edc1a56720a787e465ab4ce472_4725	e653c257947c2dd0a414de7cb159ba14_5076	31e4ba73e5ddb8c85dea419204f0df5a_5819	752b3971131f3206662b5e22da3b23aa_4748	83683a6c7ca473684645e0830a47223d_5036	03da1bd30b32560bef8e38ea7761d9fe_5050	c648bd7c3a222aa51bed3e3836bcf8c8_3661	B9T21_03140.p01	B9T15_05295.p01	B9T14_05280.p01	B9T11_04585.p01	B9T12_08095.p01	B9T18_07290.p01	B9T13_03870.p01	F387_01380.p01	A6V30_08000.p01
hrpA		ATP-dependent RNA helicase HrpA	26	26	1	1	1123				3971	3971	3971	B9T10_09235.p01	BMY_0884.p01	a04b031c37c06570dd644ef46d09ac8c_6793	2cf5bec40a3ef4476bf46f509f729c16_7004	102e21fe2bbcace64a7555dd0bcc9007_6293	4a9cac2c1a817d9acdec143b653b9a80_3453	ac8fed72b32d7540cf9a1b9ac12df95a_6598	197b0243bc5bc4c380ecfb8919a026b1_6580	79ccbe49faa72747a800162f6a36c0ca_6723	614e29224da4f337b8899b3142d81070_7138	d977e7edc1a56720a787e465ab4ce472_7256	e653c257947c2dd0a414de7cb159ba14_7248	31e4ba73e5ddb8c85dea419204f0df5a_6618	752b3971131f3206662b5e22da3b23aa_6571	83683a6c7ca473684645e0830a47223d_7492	03da1bd30b32560bef8e38ea7761d9fe_6920	c648bd7c3a222aa51bed3e3836bcf8c8_5176	B9T21_06490.p01	B9T15_09000.p01	B9T14_08970.p01	B9T11_06435.p01	B9T12_06395.p01	B9T18_09060.p01	B9T13_07665.p01	F387_00361.p01	A6V30_01540.p01
J7554_04320		winged helix-turn-helix domain-containing protein	26	26	1	1	1025				680	680	680	B9T10_08805.p01	BMY_0973.p01	a04b031c37c06570dd644ef46d09ac8c_1458	2cf5bec40a3ef4476bf46f509f729c16_2184	102e21fe2bbcace64a7555dd0bcc9007_2738	4a9cac2c1a817d9acdec143b653b9a80_3109	ac8fed72b32d7540cf9a1b9ac12df95a_3025	197b0243bc5bc4c380ecfb8919a026b1_1493	79ccbe49faa72747a800162f6a36c0ca_3430	614e29224da4f337b8899b3142d81070_2488	d977e7edc1a56720a787e465ab4ce472_3611	e653c257947c2dd0a414de7cb159ba14_3594	31e4ba73e5ddb8c85dea419204f0df5a_2503	752b3971131f3206662b5e22da3b23aa_3534	83683a6c7ca473684645e0830a47223d_4704	03da1bd30b32560bef8e38ea7761d9fe_2722	c648bd7c3a222aa51bed3e3836bcf8c8_5516	B9T21_06050.p01	B9T15_08570.p01	B9T14_08540.p01	B9T11_06865.p01	B9T12_05965.p01	B9T18_08630.p01	B9T13_07235.p01	F387_00446.p01	A6V30_01115.p01
thiC		phosphomethylpyrimidine synthase ThiC	26	26	1	1	971				1775	1787	1775	B9T10_08555.p01	BMY_1025.p01	a04b031c37c06570dd644ef46d09ac8c_1643	2cf5bec40a3ef4476bf46f509f729c16_2000	102e21fe2bbcace64a7555dd0bcc9007_2538	4a9cac2c1a817d9acdec143b653b9a80_2909	ac8fed72b32d7540cf9a1b9ac12df95a_2841	197b0243bc5bc4c380ecfb8919a026b1_1686	79ccbe49faa72747a800162f6a36c0ca_3234	614e29224da4f337b8899b3142d81070_2685	d977e7edc1a56720a787e465ab4ce472_3808	e653c257947c2dd0a414de7cb159ba14_3791	31e4ba73e5ddb8c85dea419204f0df5a_2696	752b3971131f3206662b5e22da3b23aa_3346	83683a6c7ca473684645e0830a47223d_4508	03da1bd30b32560bef8e38ea7761d9fe_2538	c648bd7c3a222aa51bed3e3836bcf8c8_5697	B9T21_05810.p01	B9T15_08340.p01	B9T14_08310.p01	B9T11_07095.p01	B9T12_05720.p01	B9T18_08390.p01	B9T13_07005.p01	F387_00497.p01	A6V30_00885.p01
asd		aspartate-semialdehyde dehydrogenase	26	26	1	1	3651				1109	1109	1109	B9T10_06315.p01	BMY_1613.p01	a04b031c37c06570dd644ef46d09ac8c_3041	2cf5bec40a3ef4476bf46f509f729c16_2519	102e21fe2bbcace64a7555dd0bcc9007_3073	4a9cac2c1a817d9acdec143b653b9a80_3697	ac8fed72b32d7540cf9a1b9ac12df95a_3883	197b0243bc5bc4c380ecfb8919a026b1_2573	79ccbe49faa72747a800162f6a36c0ca_3797	614e29224da4f337b8899b3142d81070_4206	d977e7edc1a56720a787e465ab4ce472_2571	e653c257947c2dd0a414de7cb159ba14_3262	31e4ba73e5ddb8c85dea419204f0df5a_3619	752b3971131f3206662b5e22da3b23aa_3869	83683a6c7ca473684645e0830a47223d_2881	03da1bd30b32560bef8e38ea7761d9fe_3598	c648bd7c3a222aa51bed3e3836bcf8c8_4421	B9T21_04055.p01	B9T15_06190.p01	B9T14_06160.p01	B9T11_03695.p01	B9T12_07035.p01	B9T18_06375.p01	B9T13_04865.p01	F387_00803.p01	A6V30_09020.p01
J7602_04405		TetR/AcrR family transcriptional regulator	26	26	1	1	1054				605	605	605	B9T10_08950.p01	BMY_0943.p01	a04b031c37c06570dd644ef46d09ac8c_1343	2cf5bec40a3ef4476bf46f509f729c16_2299	102e21fe2bbcace64a7555dd0bcc9007_2853	4a9cac2c1a817d9acdec143b653b9a80_3224	ac8fed72b32d7540cf9a1b9ac12df95a_3138	197b0243bc5bc4c380ecfb8919a026b1_1378	79ccbe49faa72747a800162f6a36c0ca_3545	614e29224da4f337b8899b3142d81070_2373	d977e7edc1a56720a787e465ab4ce472_3496	e653c257947c2dd0a414de7cb159ba14_3479	31e4ba73e5ddb8c85dea419204f0df5a_2388	752b3971131f3206662b5e22da3b23aa_3649	83683a6c7ca473684645e0830a47223d_4819	03da1bd30b32560bef8e38ea7761d9fe_2837	c648bd7c3a222aa51bed3e3836bcf8c8_5401	B9T21_06195.p01	B9T15_08715.p01	B9T14_08685.p01	B9T11_06720.p01	B9T12_06110.p01	B9T18_08775.p01	B9T13_07380.p01	F387_00418.p01	A6V30_01255.p01
J7602_08525		NADH-quinone oxidoreductase subunit G	26	26	1	1	3028				2300	2300	2300	B9T10_09955.p01	BMY_1340.p01	a04b031c37c06570dd644ef46d09ac8c_6435	2cf5bec40a3ef4476bf46f509f729c16_6454	102e21fe2bbcace64a7555dd0bcc9007_6622	4a9cac2c1a817d9acdec143b653b9a80_6651	ac8fed72b32d7540cf9a1b9ac12df95a_6278	197b0243bc5bc4c380ecfb8919a026b1_6904	79ccbe49faa72747a800162f6a36c0ca_6009	614e29224da4f337b8899b3142d81070_6432	d977e7edc1a56720a787e465ab4ce472_6765	e653c257947c2dd0a414de7cb159ba14_6753	31e4ba73e5ddb8c85dea419204f0df5a_6263	752b3971131f3206662b5e22da3b23aa_6062	83683a6c7ca473684645e0830a47223d_6956	03da1bd30b32560bef8e38ea7761d9fe_6210	c648bd7c3a222aa51bed3e3836bcf8c8_6429	B9T21_08095.p01	B9T15_09225.p01	B9T14_09195.p01	B9T11_09465.p01	B9T12_09180.p01	B9T18_09275.p01	B9T13_09170.p01	F387_01337.p01	A6V30_06070.p01
B9T14_06585		FixH family protein	26	26	1	1	3553				821	821	821	B9T10_06740.p01	BMY_1703.p01	a04b031c37c06570dd644ef46d09ac8c_2697	2cf5bec40a3ef4476bf46f509f729c16_2787	102e21fe2bbcace64a7555dd0bcc9007_3413	4a9cac2c1a817d9acdec143b653b9a80_4037	ac8fed72b32d7540cf9a1b9ac12df95a_3540	197b0243bc5bc4c380ecfb8919a026b1_2911	79ccbe49faa72747a800162f6a36c0ca_4060	614e29224da4f337b8899b3142d81070_3940	d977e7edc1a56720a787e465ab4ce472_2837	e653c257947c2dd0a414de7cb159ba14_2996	31e4ba73e5ddb8c85dea419204f0df5a_3963	752b3971131f3206662b5e22da3b23aa_4137	83683a6c7ca473684645e0830a47223d_3147	03da1bd30b32560bef8e38ea7761d9fe_3250	c648bd7c3a222aa51bed3e3836bcf8c8_4685	B9T21_04480.p01	B9T15_06615.p01	B9T14_06585.p01	B9T11_03270.p01	B9T12_07365.p01	B9T18_05950.p01	B9T13_05290.p01	F387_00716.p01	A6V30_09450.p01
B9T10_05905		hypothetical protein	26	26	1	1	3743				650	650	650	B9T10_05905.p01	BMY_1529.p01	a04b031c37c06570dd644ef46d09ac8c_3374	2cf5bec40a3ef4476bf46f509f729c16_4585	102e21fe2bbcace64a7555dd0bcc9007_5080	4a9cac2c1a817d9acdec143b653b9a80_4627	ac8fed72b32d7540cf9a1b9ac12df95a_6794	197b0243bc5bc4c380ecfb8919a026b1_4810	79ccbe49faa72747a800162f6a36c0ca_5126	614e29224da4f337b8899b3142d81070_4539	d977e7edc1a56720a787e465ab4ce472_5162	e653c257947c2dd0a414de7cb159ba14_4640	31e4ba73e5ddb8c85dea419204f0df5a_7314	752b3971131f3206662b5e22da3b23aa_5191	83683a6c7ca473684645e0830a47223d_5473	03da1bd30b32560bef8e38ea7761d9fe_4670	c648bd7c3a222aa51bed3e3836bcf8c8_4088	B9T21_03645.p01	B9T15_05775.p01	B9T14_05745.p01	B9T11_04110.p01	B9T12_06625.p01	B9T18_06785.p01	B9T13_04395.p01	F387_01477.p01	A6V30_08615.p01
leuD		3-isopropylmalate dehydratase small subunit	26	26	1	1	3511				665	665	665	B9T10_06920.p01	BMY_1741.p01	a04b031c37c06570dd644ef46d09ac8c_2540	2cf5bec40a3ef4476bf46f509f729c16_2932	102e21fe2bbcace64a7555dd0bcc9007_3570	4a9cac2c1a817d9acdec143b653b9a80_4194	ac8fed72b32d7540cf9a1b9ac12df95a_3383	197b0243bc5bc4c380ecfb8919a026b1_3056	79ccbe49faa72747a800162f6a36c0ca_4204	614e29224da4f337b8899b3142d81070_3795	d977e7edc1a56720a787e465ab4ce472_2982	e653c257947c2dd0a414de7cb159ba14_2851	31e4ba73e5ddb8c85dea419204f0df5a_4108	752b3971131f3206662b5e22da3b23aa_4294	83683a6c7ca473684645e0830a47223d_3292	03da1bd30b32560bef8e38ea7761d9fe_3093	c648bd7c3a222aa51bed3e3836bcf8c8_4842	B9T21_04675.p01	B9T15_06810.p01	B9T14_06780.p01	B9T11_03075.p01	B9T12_07545.p01	B9T18_05770.p01	B9T13_05485.p01	F387_00677.p01	A6V30_09630.p01
J7600_02950		lactate dehydrogenase	26	26	1	1	2549				1001	1001	1001	B9T10_03930.p01	BMY_0621.p01	a04b031c37c06570dd644ef46d09ac8c_5646	2cf5bec40a3ef4476bf46f509f729c16_5642	102e21fe2bbcace64a7555dd0bcc9007_7506	4a9cac2c1a817d9acdec143b653b9a80_7564	ac8fed72b32d7540cf9a1b9ac12df95a_1431	197b0243bc5bc4c380ecfb8919a026b1_5987	79ccbe49faa72747a800162f6a36c0ca_1812	614e29224da4f337b8899b3142d81070_2343	d977e7edc1a56720a787e465ab4ce472_2356	e653c257947c2dd0a414de7cb159ba14_2343	31e4ba73e5ddb8c85dea419204f0df5a_313	752b3971131f3206662b5e22da3b23aa_2500	83683a6c7ca473684645e0830a47223d_325	03da1bd30b32560bef8e38ea7761d9fe_5936	c648bd7c3a222aa51bed3e3836bcf8c8_919	B9T21_06735.p01	B9T15_01135.p01	B9T14_03895.p01	B9T11_05235.p01	B9T12_04455.p01	B9T18_01195.p01	B9T13_07905.p01	F387_01207.p01	A6V30_06895.p01
glpK		glycerol kinase GlpK	26	26	1	1	2688				1499	1499	1499	B9T10_05080.p01	BMY_0857.p01	a04b031c37c06570dd644ef46d09ac8c_7765	2cf5bec40a3ef4476bf46f509f729c16_7516	102e21fe2bbcace64a7555dd0bcc9007_7604	4a9cac2c1a817d9acdec143b653b9a80_7596	ac8fed72b32d7540cf9a1b9ac12df95a_7651	197b0243bc5bc4c380ecfb8919a026b1_7716	79ccbe49faa72747a800162f6a36c0ca_7473	614e29224da4f337b8899b3142d81070_7780	d977e7edc1a56720a787e465ab4ce472_7901	e653c257947c2dd0a414de7cb159ba14_7892	31e4ba73e5ddb8c85dea419204f0df5a_7681	752b3971131f3206662b5e22da3b23aa_7479	83683a6c7ca473684645e0830a47223d_6826	03da1bd30b32560bef8e38ea7761d9fe_7857	c648bd7c3a222aa51bed3e3836bcf8c8_22	B9T21_07935.p01	B9T15_00035.p01	B9T14_04990.p01	B9T11_06330.p01	B9T12_03345.p01	B9T18_00030.p01	B9T13_09000.p01	F387_01541.p01	A6V30_05910.p01
potA		polyamine ABC transporter ATP-binding protein	26	26	1	1	1288				1142	1142	1142	B9T10_00570.p01	BMY_1994.p01	a04b031c37c06570dd644ef46d09ac8c_5035	2cf5bec40a3ef4476bf46f509f729c16_3438	102e21fe2bbcace64a7555dd0bcc9007_4233	4a9cac2c1a817d9acdec143b653b9a80_2230	ac8fed72b32d7540cf9a1b9ac12df95a_5240	197b0243bc5bc4c380ecfb8919a026b1_3717	79ccbe49faa72747a800162f6a36c0ca_5653	614e29224da4f337b8899b3142d81070_5403	d977e7edc1a56720a787e465ab4ce472_5525	e653c257947c2dd0a414de7cb159ba14_5508	31e4ba73e5ddb8c85dea419204f0df5a_4891	752b3971131f3206662b5e22da3b23aa_5552	83683a6c7ca473684645e0830a47223d_6022	03da1bd30b32560bef8e38ea7761d9fe_4301	c648bd7c3a222aa51bed3e3836bcf8c8_3362	B9T21_00565.p01	B9T15_04480.p01	B9T14_00560.p01	B9T11_02185.p01	B9T12_00580.p01	B9T18_04535.p01	B9T13_00560.p01	F387_00949.p01	A6V30_02200.p01
pstB		phosphate ABC transporter ATP-binding protein PstB	26	26	1	1	225				770	770	770	B9T10_05355.p01	BMY_1423.p01	a04b031c37c06570dd644ef46d09ac8c_3784	2cf5bec40a3ef4476bf46f509f729c16_4184	102e21fe2bbcace64a7555dd0bcc9007_4653	4a9cac2c1a817d9acdec143b653b9a80_5054	ac8fed72b32d7540cf9a1b9ac12df95a_5801	197b0243bc5bc4c380ecfb8919a026b1_4341	79ccbe49faa72747a800162f6a36c0ca_4659	614e29224da4f337b8899b3142d81070_4989	d977e7edc1a56720a787e465ab4ce472_4713	e653c257947c2dd0a414de7cb159ba14_5088	31e4ba73e5ddb8c85dea419204f0df5a_5803	752b3971131f3206662b5e22da3b23aa_4732	83683a6c7ca473684645e0830a47223d_5024	03da1bd30b32560bef8e38ea7761d9fe_5062	c648bd7c3a222aa51bed3e3836bcf8c8_3649	B9T21_03120.p01	B9T15_05275.p01	B9T14_05260.p01	B9T11_04605.p01	B9T12_08075.p01	B9T18_07310.p01	B9T13_03850.p01	F387_01376.p01	A6V30_07985.p01
J7561_08280		1-acyl-sn-glycerol-3-phosphate acyltransferase	26	26	1	1	3046				725	725	725	B9T10_09870.p01	BMY_1322.p01	a04b031c37c06570dd644ef46d09ac8c_6503	2cf5bec40a3ef4476bf46f509f729c16_6387	102e21fe2bbcace64a7555dd0bcc9007_6555	4a9cac2c1a817d9acdec143b653b9a80_6583	ac8fed72b32d7540cf9a1b9ac12df95a_6210	197b0243bc5bc4c380ecfb8919a026b1_6972	79ccbe49faa72747a800162f6a36c0ca_6077	614e29224da4f337b8899b3142d81070_6500	d977e7edc1a56720a787e465ab4ce472_6697	e653c257947c2dd0a414de7cb159ba14_6686	31e4ba73e5ddb8c85dea419204f0df5a_6331	752b3971131f3206662b5e22da3b23aa_6130	83683a6c7ca473684645e0830a47223d_7024	03da1bd30b32560bef8e38ea7761d9fe_6276	c648bd7c3a222aa51bed3e3836bcf8c8_6495	B9T21_08180.p01	B9T15_09310.p01	B9T14_09280.p01	B9T11_09380.p01	B9T12_09095.p01	B9T18_09360.p01	B9T13_09255.p01	F387_01320.p01	A6V30_06155.p01
recN		DNA repair protein RecN	26	26	1	1	1268				1664	1664	1664	B9T10_00470.p01	BMY_1975.p01	a04b031c37c06570dd644ef46d09ac8c_5115	2cf5bec40a3ef4476bf46f509f729c16_3358	102e21fe2bbcace64a7555dd0bcc9007_4313	4a9cac2c1a817d9acdec143b653b9a80_2310	ac8fed72b32d7540cf9a1b9ac12df95a_5320	197b0243bc5bc4c380ecfb8919a026b1_3797	79ccbe49faa72747a800162f6a36c0ca_5733	614e29224da4f337b8899b3142d81070_5324	d977e7edc1a56720a787e465ab4ce472_5445	e653c257947c2dd0a414de7cb159ba14_5428	31e4ba73e5ddb8c85dea419204f0df5a_4971	752b3971131f3206662b5e22da3b23aa_5472	83683a6c7ca473684645e0830a47223d_6102	03da1bd30b32560bef8e38ea7761d9fe_4381	c648bd7c3a222aa51bed3e3836bcf8c8_3442	B9T21_00465.p01	B9T15_04580.p01	B9T14_00460.p01	B9T11_02285.p01	B9T12_00480.p01	B9T18_04635.p01	B9T13_00460.p01	F387_00929.p01	A6V30_02100.p01
J7606_05680		efflux RND transporter periplasmic adaptor subunit	26	26	1	1	753				986	986	986	B9T10_07650.p01	BMY_1200.p01	a04b031c37c06570dd644ef46d09ac8c_2272	2cf5bec40a3ef4476bf46f509f729c16_1300	102e21fe2bbcace64a7555dd0bcc9007_1796	4a9cac2c1a817d9acdec143b653b9a80_6431	ac8fed72b32d7540cf9a1b9ac12df95a_2219	197b0243bc5bc4c380ecfb8919a026b1_2359	79ccbe49faa72747a800162f6a36c0ca_2614	614e29224da4f337b8899b3142d81070_3400	d977e7edc1a56720a787e465ab4ce472_4523	e653c257947c2dd0a414de7cb159ba14_4506	31e4ba73e5ddb8c85dea419204f0df5a_3413	752b3971131f3206662b5e22da3b23aa_2652	83683a6c7ca473684645e0830a47223d_3792	03da1bd30b32560bef8e38ea7761d9fe_1868	c648bd7c3a222aa51bed3e3836bcf8c8_6314	B9T21_05015.p01	B9T15_07490.p01	B9T14_07460.p01	B9T11_10075.p01	B9T12_04900.p01	B9T18_07560.p01	B9T13_06155.p01	F387_01773.p01	A6V30_00015.p01
J7607_03800		cytochrome c	26	26	1	1	891				1361	1361	1361	B9T10_08155.p01	BMY_1106.p01	a04b031c37c06570dd644ef46d09ac8c_1960	2cf5bec40a3ef4476bf46f509f729c16_1684	102e21fe2bbcace64a7555dd0bcc9007_2220	4a9cac2c1a817d9acdec143b653b9a80_2591	ac8fed72b32d7540cf9a1b9ac12df95a_2523	197b0243bc5bc4c380ecfb8919a026b1_2003	79ccbe49faa72747a800162f6a36c0ca_2918	614e29224da4f337b8899b3142d81070_3002	d977e7edc1a56720a787e465ab4ce472_4125	e653c257947c2dd0a414de7cb159ba14_4108	31e4ba73e5ddb8c85dea419204f0df5a_3013	752b3971131f3206662b5e22da3b23aa_3028	83683a6c7ca473684645e0830a47223d_4190	03da1bd30b32560bef8e38ea7761d9fe_2220	c648bd7c3a222aa51bed3e3836bcf8c8_6014	B9T21_05410.p01	B9T15_07940.p01	B9T14_07910.p01	B9T11_07495.p01	B9T12_05320.p01	B9T18_07990.p01	B9T13_06605.p01	F387_00577.p01	A6V30_00485.p01
J7547_04475		zinc-dependent alcohol dehydrogenase family protein	26	26	1	1	3513				1082	1082	1082	B9T10_06910.p01	BMY_1739.p01	a04b031c37c06570dd644ef46d09ac8c_2548	2cf5bec40a3ef4476bf46f509f729c16_2924	102e21fe2bbcace64a7555dd0bcc9007_3562	4a9cac2c1a817d9acdec143b653b9a80_4186	ac8fed72b32d7540cf9a1b9ac12df95a_3391	197b0243bc5bc4c380ecfb8919a026b1_3048	79ccbe49faa72747a800162f6a36c0ca_4196	614e29224da4f337b8899b3142d81070_3803	d977e7edc1a56720a787e465ab4ce472_2974	e653c257947c2dd0a414de7cb159ba14_2859	31e4ba73e5ddb8c85dea419204f0df5a_4100	752b3971131f3206662b5e22da3b23aa_4286	83683a6c7ca473684645e0830a47223d_3284	03da1bd30b32560bef8e38ea7761d9fe_3101	c648bd7c3a222aa51bed3e3836bcf8c8_4834	B9T21_04665.p01	B9T15_06800.p01	B9T14_06770.p01	B9T11_03085.p01	B9T12_07535.p01	B9T18_05780.p01	B9T13_05475.p01	F387_00679.p01	A6V30_09620.p01
atpE		F0F1 ATP synthase subunit C	26	26	1	1	167				233	233	233	B9T10_05255.p01	BMY_1401.p01	a04b031c37c06570dd644ef46d09ac8c_3863	2cf5bec40a3ef4476bf46f509f729c16_4105	102e21fe2bbcace64a7555dd0bcc9007_4575	4a9cac2c1a817d9acdec143b653b9a80_5133	ac8fed72b32d7540cf9a1b9ac12df95a_5879	197b0243bc5bc4c380ecfb8919a026b1_4262	79ccbe49faa72747a800162f6a36c0ca_4580	614e29224da4f337b8899b3142d81070_5068	d977e7edc1a56720a787e465ab4ce472_4635	e653c257947c2dd0a414de7cb159ba14_5167	31e4ba73e5ddb8c85dea419204f0df5a_5724	752b3971131f3206662b5e22da3b23aa_4654	83683a6c7ca473684645e0830a47223d_4945	03da1bd30b32560bef8e38ea7761d9fe_5141	c648bd7c3a222aa51bed3e3836bcf8c8_3570	B9T21_03020.p01	B9T15_05175.p01	B9T14_05160.p01	B9T11_04705.p01	B9T12_07975.p01	B9T18_07410.p01	B9T13_03750.p01	F387_01935.p01	A6V30_07260.p01
[truncated: 1,138 more rows]
