# Supplementary material for: Comparative Genomic Analysis of the Human Pathogen Wohlfahrtiimonas Chitiniclastica Provides Insight Into the Identification of Antimicrobial Resistance Genotypes and Potential Virulence Traits
Source: Front Cell Infect Microbiol. 2022 Jul 7;12:912427. doi: 10.3389/fcimb.2022.912427 (PMC9301364; doi:10.3389/fcimb.2022.912427)
Supplement: Supplementary file 5 [file Table_5.xlsx]

## Sheet: S05_Accessory_Genome
Gene	Non-unique Gene name	Annotation	No. isolates	No. sequences	Avg sequences per isolate	Genome Fragment	Order within Fragment	Accessory Fragment	Accessory Order with Fragment	QC	Min group size nuc	Max group size nuc	Avg group size nuc	ATCC_51249	BM-Y	DSM_100374	DSM_100375	DSM_100676	DSM_100917	DSM_105708	DSM_105712	DSM_105838	DSM_105839	DSM_105984	DSM_106597	DSM_108045	DSM_108048	DSM_110179	DSM_110473	DSM_18708T	F6512	F6513	F6514	F6515	F6516	F9188	G9145	SH04.gff3	Strain_20
BMY_0330		(deoxy)nucleoside triphosphate pyrophosphohydrolase	24	24	1	1	1824	1	1339		395	398	395	B9T10_02180.p01	BMY_0330.p01	a04b031c37c06570dd644ef46d09ac8c_442	2cf5bec40a3ef4476bf46f509f729c16_420		4a9cac2c1a817d9acdec143b653b9a80_920	ac8fed72b32d7540cf9a1b9ac12df95a_878	197b0243bc5bc4c380ecfb8919a026b1_885	79ccbe49faa72747a800162f6a36c0ca_842	614e29224da4f337b8899b3142d81070_876	d977e7edc1a56720a787e465ab4ce472_889	e653c257947c2dd0a414de7cb159ba14_876	31e4ba73e5ddb8c85dea419204f0df5a_1499	752b3971131f3206662b5e22da3b23aa_846	83683a6c7ca473684645e0830a47223d_1792	03da1bd30b32560bef8e38ea7761d9fe_984	c648bd7c3a222aa51bed3e3836bcf8c8_2048	B9T21_02170.p01	B9T15_02535.p01	B9T14_02500.p01	B9T11_00555.p01		B9T18_02910.p01	B9T13_02240.p01	F387_00229.p01	A6V30_03795.p01
B143_RS0107890		(p)ppGpp synthetase	5	5	1	1	789	171	1		1085	1085	1085					102e21fe2bbcace64a7555dd0bcc9007_1921	4a9cac2c1a817d9acdec143b653b9a80_6306			79ccbe49faa72747a800162f6a36c0ca_2739								c648bd7c3a222aa51bed3e3836bcf8c8_6189	B9T21_05185.p01
F387_00098		(R,R)-butanediol dehydrogenase	2	2	1	1	629	1	156		479	1049	764		BMY_0186.p01																							F387_00098.p01
A6V30_07855		16S rRNA methyltransferase G	1	1	1	1	200	3	25		629	629	629																										A6V30_07855.p01
F387_00766		1-acyl-sn-glycerol-3-phosphate acyltransferase	16	16	1	1	3606	2	4		788	788	788	B9T10_06500.p01	BMY_1651.p01	a04b031c37c06570dd644ef46d09ac8c_2898		102e21fe2bbcace64a7555dd0bcc9007_3216	4a9cac2c1a817d9acdec143b653b9a80_3840	ac8fed72b32d7540cf9a1b9ac12df95a_3740	197b0243bc5bc4c380ecfb8919a026b1_2716					31e4ba73e5ddb8c85dea419204f0df5a_3766			03da1bd30b32560bef8e38ea7761d9fe_3451			B9T15_06375.p01	B9T14_06345.p01	B9T11_03510.p01		B9T18_06190.p01	B9T13_05050.p01	F387_00766.p01	A6V30_09210.p01
J7622_02890		2,3-butanediol dehydrogenase	24	24	1	1	1618	1	1482		587	1049	1029	B9T10_01550.p01	BMY_0187.p01	a04b031c37c06570dd644ef46d09ac8c_947	2cf5bec40a3ef4476bf46f509f729c16_925		4a9cac2c1a817d9acdec143b653b9a80_1425	ac8fed72b32d7540cf9a1b9ac12df95a_373	197b0243bc5bc4c380ecfb8919a026b1_382	79ccbe49faa72747a800162f6a36c0ca_1347	614e29224da4f337b8899b3142d81070_373	d977e7edc1a56720a787e465ab4ce472_386	e653c257947c2dd0a414de7cb159ba14_373	31e4ba73e5ddb8c85dea419204f0df5a_2004	752b3971131f3206662b5e22da3b23aa_1353	83683a6c7ca473684645e0830a47223d_2295	03da1bd30b32560bef8e38ea7761d9fe_1489	c648bd7c3a222aa51bed3e3836bcf8c8_2585	B9T21_01540.p01	B9T15_03170.p01	B9T14_01870.p01	B9T11_01190.p01	B9T12_01560.p01	B9T18_03545.p01	B9T13_01555.p01		A6V30_03165.p01
BMY_2135		2-hydroxyacid dehydrogenase	1	1	1	1	2921	1	396		1004	1004	1004		BMY_2135.p01
leuA		2-isopropylmalate synthase	15	15	1	1	2776	4	1		134	1682	1578	B9T10_04660.p01	BMY_0765.p01	a04b031c37c06570dd644ef46d09ac8c_6084	2cf5bec40a3ef4476bf46f509f729c16_5938			ac8fed72b32d7540cf9a1b9ac12df95a_1965		79ccbe49faa72747a800162f6a36c0ca_2364					752b3971131f3206662b5e22da3b23aa_1966		03da1bd30b32560bef8e38ea7761d9fe_5465	c648bd7c3a222aa51bed3e3836bcf8c8_357		B9T15_00450.p01	B9T14_04580.p01	B9T11_05920.p01	B9T12_03765.p01	B9T18_00450.p01	B9T13_08590.p01
group_643	leuA	2-isopropylmalate synthase	12	12	1	1	2788	4	12		1550	1682	1671		BMY_0764.p01			102e21fe2bbcace64a7555dd0bcc9007_5502	4a9cac2c1a817d9acdec143b653b9a80_5537		197b0243bc5bc4c380ecfb8919a026b1_5142		614e29224da4f337b8899b3142d81070_6114	d977e7edc1a56720a787e465ab4ce472_6236	e653c257947c2dd0a414de7cb159ba14_6223	31e4ba73e5ddb8c85dea419204f0df5a_5329		83683a6c7ca473684645e0830a47223d_6449			B9T21_07445.p01							F387_01628.p01	A6V30_05485.p01
hpaH		2-oxo-hepta-3-ene-1,7-dioic acid hydratase	1	1	1	1	666	7	8		803	803	803													31e4ba73e5ddb8c85dea419204f0df5a_4816
hpaD		3,4-dihydroxyphenylacetate 2,3-dioxygenase	1	1	1	1	664	7	6		851	851	851													31e4ba73e5ddb8c85dea419204f0df5a_4824
B9T11_06070		30S ribosomal protein S21	1	1	1	1	2742	165	1		257	257	257																					B9T11_06070.p01
J7624_09750		3'-5' exonuclease	1	1	1	1	544	1	100		539	539	539																03da1bd30b32560bef8e38ea7761d9fe_7734
B9T18_01330		3'-5' exoribonuclease	7	7	1	1	1489	1	932		590	590	590			a04b031c37c06570dd644ef46d09ac8c_4019				ac8fed72b32d7540cf9a1b9ac12df95a_1327							752b3971131f3206662b5e22da3b23aa_2608		03da1bd30b32560bef8e38ea7761d9fe_6048					B9T11_07980.p01		B9T18_01330.p01	B9T13_03000.p01
J7607_00555		3'-5' exoribonuclease	1	1	1	1	1425	1	1864		608	608	608													31e4ba73e5ddb8c85dea419204f0df5a_437
group_1401	kdsA	3-deoxy-8-phosphooctulonate synthase	6	6	1	1	2660	4	32		839	839	839								197b0243bc5bc4c380ecfb8919a026b1_5170		614e29224da4f337b8899b3142d81070_6090	d977e7edc1a56720a787e465ab4ce472_6213	e653c257947c2dd0a414de7cb159ba14_6199			83683a6c7ca473684645e0830a47223d_6473			B9T21_07490.p01
group_1425	kdsB	3-deoxy-manno-octulosonate cytidylyltransferase	5	5	1	1	2653	4	5		731	740	732										614e29224da4f337b8899b3142d81070_6094	d977e7edc1a56720a787e465ab4ce472_6217	e653c257947c2dd0a414de7cb159ba14_6203			83683a6c7ca473684645e0830a47223d_6469			B9T21_07485.p01
B9T21_04605		3-methyl-2-oxobutanoate hydroxymethyltransferase	1	1	1	1	3526	14	1		791	791	791																		B9T21_04605.p01
group_1751	fabG	3-oxoacyl-ACP reductase	17	17	1	1	3628	2	20		719	719	719	B9T10_06430.p01	BMY_1637.p01	a04b031c37c06570dd644ef46d09ac8c_2954		102e21fe2bbcace64a7555dd0bcc9007_3160	4a9cac2c1a817d9acdec143b653b9a80_3784	ac8fed72b32d7540cf9a1b9ac12df95a_3796	197b0243bc5bc4c380ecfb8919a026b1_2660					31e4ba73e5ddb8c85dea419204f0df5a_3710			03da1bd30b32560bef8e38ea7761d9fe_3507		B9T21_04170.p01	B9T15_06305.p01	B9T14_06275.p01	B9T11_03580.p01		B9T18_06260.p01	B9T13_04980.p01	F387_00780.p01	A6V30_09140.p01
group_1889	fabG	3-oxoacyl-ACP reductase FabG	13	13	1	1	2828	291	1		755	758	755	B9T10_04465.p01	BMY_0724.p01		2cf5bec40a3ef4476bf46f509f729c16_6093	102e21fe2bbcace64a7555dd0bcc9007_5657	4a9cac2c1a817d9acdec143b653b9a80_5693		197b0243bc5bc4c380ecfb8919a026b1_4988					31e4ba73e5ddb8c85dea419204f0df5a_5173				c648bd7c3a222aa51bed3e3836bcf8c8_513	B9T21_07245.p01	B9T15_00645.p01	B9T14_04385.p01	B9T11_05725.p01				F387_01666.p01
BMY_1191		4-aminobutyrate transaminase	1	1	1	1	752	257	1		986	986	986		BMY_1191.p01
group_1858	gabT	4-aminobutyrate--2-oxoglutarate transaminase	20	20	1	1	1881	1	1182		1292	1292	1292		BMY_0389.p01	a04b031c37c06570dd644ef46d09ac8c_231	2cf5bec40a3ef4476bf46f509f729c16_209		4a9cac2c1a817d9acdec143b653b9a80_709	ac8fed72b32d7540cf9a1b9ac12df95a_1089	197b0243bc5bc4c380ecfb8919a026b1_1096	79ccbe49faa72747a800162f6a36c0ca_631	614e29224da4f337b8899b3142d81070_1091	d977e7edc1a56720a787e465ab4ce472_1104	e653c257947c2dd0a414de7cb159ba14_1091	31e4ba73e5ddb8c85dea419204f0df5a_1288	752b3971131f3206662b5e22da3b23aa_635	83683a6c7ca473684645e0830a47223d_1577	03da1bd30b32560bef8e38ea7761d9fe_773	c648bd7c3a222aa51bed3e3836bcf8c8_1683		B9T15_02090.p01		B9T11_00290.p01		B9T18_02645.p01		F387_00283.p01	A6V30_04065.p01
hpaI		4-hydroxy-2-oxoheptanedioate aldolase	1	1	1	1	667	7	9		818	818	818													31e4ba73e5ddb8c85dea419204f0df5a_4812
A6V30_07760		4-hydroxybenzoate octaprenyltransferase	1	1	1	1	181	3	36		914	914	914																										A6V30_07760.p01
J7624_04375		4-hydroxybenzoyl-CoA thioesterase	16	16	1	1	3616	2	29		437	437	437	B9T10_06460.p01	BMY_1643.p01	a04b031c37c06570dd644ef46d09ac8c_2930		102e21fe2bbcace64a7555dd0bcc9007_3184	4a9cac2c1a817d9acdec143b653b9a80_3808	ac8fed72b32d7540cf9a1b9ac12df95a_3772	197b0243bc5bc4c380ecfb8919a026b1_2684					31e4ba73e5ddb8c85dea419204f0df5a_3734			03da1bd30b32560bef8e38ea7761d9fe_3483			B9T15_06335.p01	B9T14_06305.p01	B9T11_03550.p01		B9T18_06230.p01	B9T13_05010.p01	F387_00774.p01	A6V30_09170.p01
B9T21_04200		4-hydroxybenzoyl-CoA thioesterase	1	1	1	1	3622	2	23		443	443	443																		B9T21_04200.p01
hpaA		4-hydroxyphenylacetate catabolism regulatory protein HpaA	1	1	1	1	672	7	14		905	905	905													31e4ba73e5ddb8c85dea419204f0df5a_4792
B9T12_03285		4-hydroxy-tetrahydrodipicolinate synthase	1	1	1	1	1976	1	1257		863	863	863																						B9T12_03285.p01
A6V30_07750		4-phosphopantetheinyl transferase	1	1	1	1	179	3	34		677	677	677																										A6V30_07750.p01
rpmH		50S ribosomal protein L34	23	23	1	1	2790	143	1		134	134	134	B9T10_04650.p01		a04b031c37c06570dd644ef46d09ac8c_6076	2cf5bec40a3ef4476bf46f509f729c16_5945	102e21fe2bbcace64a7555dd0bcc9007_5510	4a9cac2c1a817d9acdec143b653b9a80_5545	ac8fed72b32d7540cf9a1b9ac12df95a_1957	197b0243bc5bc4c380ecfb8919a026b1_5134	79ccbe49faa72747a800162f6a36c0ca_2356	614e29224da4f337b8899b3142d81070_6122	d977e7edc1a56720a787e465ab4ce472_6244	e653c257947c2dd0a414de7cb159ba14_6231	31e4ba73e5ddb8c85dea419204f0df5a_5321	752b3971131f3206662b5e22da3b23aa_1974	83683a6c7ca473684645e0830a47223d_6441	03da1bd30b32560bef8e38ea7761d9fe_5457	c648bd7c3a222aa51bed3e3836bcf8c8_365	B9T21_07435.p01	B9T15_00460.p01	B9T14_04570.p01	B9T11_05910.p01	B9T12_03775.p01	B9T18_00460.p01	B9T13_08580.p01
rpmI		50S ribosomal protein L35	24	24	1	1	1039	230	1		197	197	197	B9T10_08870.p01	BMY_0959.p01	a04b031c37c06570dd644ef46d09ac8c_1406	2cf5bec40a3ef4476bf46f509f729c16_2236	102e21fe2bbcace64a7555dd0bcc9007_2790	4a9cac2c1a817d9acdec143b653b9a80_3161	ac8fed72b32d7540cf9a1b9ac12df95a_3077	197b0243bc5bc4c380ecfb8919a026b1_1441	79ccbe49faa72747a800162f6a36c0ca_3482	614e29224da4f337b8899b3142d81070_2436	d977e7edc1a56720a787e465ab4ce472_3559	e653c257947c2dd0a414de7cb159ba14_3542	31e4ba73e5ddb8c85dea419204f0df5a_2451	752b3971131f3206662b5e22da3b23aa_3586	83683a6c7ca473684645e0830a47223d_4756	03da1bd30b32560bef8e38ea7761d9fe_2774	c648bd7c3a222aa51bed3e3836bcf8c8_5464	B9T21_06115.p01	B9T15_08635.p01	B9T14_08605.p01	B9T11_06800.p01	B9T12_06030.p01	B9T18_08695.p01	B9T13_07300.p01
rpmJ		50S ribosomal protein L36	23	23	1	1	3661	162	1		113	113	113	B9T10_06265.p01		a04b031c37c06570dd644ef46d09ac8c_3081	2cf5bec40a3ef4476bf46f509f729c16_2479	102e21fe2bbcace64a7555dd0bcc9007_3033	4a9cac2c1a817d9acdec143b653b9a80_3657	ac8fed72b32d7540cf9a1b9ac12df95a_3923	197b0243bc5bc4c380ecfb8919a026b1_2533	79ccbe49faa72747a800162f6a36c0ca_3757	614e29224da4f337b8899b3142d81070_4246	d977e7edc1a56720a787e465ab4ce472_2531	e653c257947c2dd0a414de7cb159ba14_3302	31e4ba73e5ddb8c85dea419204f0df5a_3579	752b3971131f3206662b5e22da3b23aa_3829	83683a6c7ca473684645e0830a47223d_2841	03da1bd30b32560bef8e38ea7761d9fe_3638	c648bd7c3a222aa51bed3e3836bcf8c8_4381	B9T21_04005.p01	B9T15_06140.p01	B9T14_06110.p01	B9T11_03745.p01	B9T12_06985.p01	B9T18_06425.p01	B9T13_04815.p01
J7607_06065		5-carboxymethyl-2-hydroxymuconate Delta-isomerase	1	1	1	1	665	7	7		383	383	383													31e4ba73e5ddb8c85dea419204f0df5a_4820
hpaE		5-carboxymethyl-2-hydroxymuconate semialdehyde dehydrogenase	1	1	1	1	684	7	5		1460	1460	1460													31e4ba73e5ddb8c85dea419204f0df5a_4828
J7624_06125		5-formyltetrahydrofolate cyclo-ligase	22	22	1	1	275	222	1		548	593	554	B9T10_05590.p01	BMY_1471.p01	a04b031c37c06570dd644ef46d09ac8c_3597	2cf5bec40a3ef4476bf46f509f729c16_4379	102e21fe2bbcace64a7555dd0bcc9007_4848	4a9cac2c1a817d9acdec143b653b9a80_4859	ac8fed72b32d7540cf9a1b9ac12df95a_5612	197b0243bc5bc4c380ecfb8919a026b1_4575	79ccbe49faa72747a800162f6a36c0ca_4842	614e29224da4f337b8899b3142d81070_4802	d977e7edc1a56720a787e465ab4ce472_4898	e653c257947c2dd0a414de7cb159ba14_4903	31e4ba73e5ddb8c85dea419204f0df5a_5992	752b3971131f3206662b5e22da3b23aa_4923	83683a6c7ca473684645e0830a47223d_5209	03da1bd30b32560bef8e38ea7761d9fe_4877		B9T21_03360.p01				B9T12_08315.p01	B9T18_07070.p01	B9T13_04090.p01	F387_01424.p01	A6V30_08215.p01
B9T14_05500		5-formyltetrahydrofolate cyclo-ligase	4	4	1	1	109	208	1		548	548	548																	c648bd7c3a222aa51bed3e3836bcf8c8_3840		B9T15_05515.p01	B9T14_05500.p01	B9T11_04365.p01
J7552_00995		7-cyano-7-deazaguanine/7-aminomethyl-7- deazaguanine transporter	24	24	1	1	1727	1	1365		674	674	674	B9T10_02065.p01	BMY_0300.p01	a04b031c37c06570dd644ef46d09ac8c_535	2cf5bec40a3ef4476bf46f509f729c16_513		4a9cac2c1a817d9acdec143b653b9a80_1013	ac8fed72b32d7540cf9a1b9ac12df95a_786	197b0243bc5bc4c380ecfb8919a026b1_795	79ccbe49faa72747a800162f6a36c0ca_935	614e29224da4f337b8899b3142d81070_786	d977e7edc1a56720a787e465ab4ce472_799	e653c257947c2dd0a414de7cb159ba14_786	31e4ba73e5ddb8c85dea419204f0df5a_1594	752b3971131f3206662b5e22da3b23aa_939	83683a6c7ca473684645e0830a47223d_1883	03da1bd30b32560bef8e38ea7761d9fe_1077	c648bd7c3a222aa51bed3e3836bcf8c8_2141	B9T21_02055.p01	B9T15_02655.p01	B9T14_02385.p01	B9T11_00675.p01	B9T12_02075.p01	B9T18_03030.p01	B9T13_02125.p01	F387_00204.p01
J7622_04985		AAA family ATPase	11	11	1	1	724	1	256		2159	2159	2159				2cf5bec40a3ef4476bf46f509f729c16_1473	102e21fe2bbcace64a7555dd0bcc9007_1965	4a9cac2c1a817d9acdec143b653b9a80_6262				614e29224da4f337b8899b3142d81070_3233	d977e7edc1a56720a787e465ab4ce472_4356	e653c257947c2dd0a414de7cb159ba14_4339		752b3971131f3206662b5e22da3b23aa_2829	83683a6c7ca473684645e0830a47223d_3959				B9T15_07695.p01	B9T14_07665.p01				B9T13_06360.p01
F387_02051		AAA family ATPase	9	9	1	1	2239	1	729		167	635	349		BMY_2159.p01		2cf5bec40a3ef4476bf46f509f729c16_7773				197b0243bc5bc4c380ecfb8919a026b1_7856					31e4ba73e5ddb8c85dea419204f0df5a_7934					B9T21_09635.p01	B9T15_09935.p01	B9T14_09905.p01			B9T18_10135.p01		F387_02051.p01
J7547_09965		AAA family ATPase	7	7	1	1	2222	1	877		635	635	635					102e21fe2bbcace64a7555dd0bcc9007_7886	4a9cac2c1a817d9acdec143b653b9a80_7874		197b0243bc5bc4c380ecfb8919a026b1_7775	79ccbe49faa72747a800162f6a36c0ca_7580					752b3971131f3206662b5e22da3b23aa_7745							B9T11_10145.p01					A6V30_10075.p01
J7600_02480		AAA family ATPase	6	6	1	1	2197	1	1847		1322	1322	1322			a04b031c37c06570dd644ef46d09ac8c_5272							614e29224da4f337b8899b3142d81070_1971	d977e7edc1a56720a787e465ab4ce472_1984	e653c257947c2dd0a414de7cb159ba14_1971			83683a6c7ca473684645e0830a47223d_697			B9T21_09840.p01
J7547_09955		AAA family ATPase	6	6	1	1	2963	1	450		635	635	635					102e21fe2bbcace64a7555dd0bcc9007_7878	4a9cac2c1a817d9acdec143b653b9a80_7882		197b0243bc5bc4c380ecfb8919a026b1_7767						752b3971131f3206662b5e22da3b23aa_7753										B9T13_10220.p01		A6V30_10085.p01
J7606_02255		AAA family ATPase	4	4	1	1	548	1	198		1253	1253	1253										614e29224da4f337b8899b3142d81070_1791	d977e7edc1a56720a787e465ab4ce472_1804	e653c257947c2dd0a414de7cb159ba14_1791			83683a6c7ca473684645e0830a47223d_877
J7622_05025		AAA family ATPase	4	4	1	1	816	1	229		1535	1535	1535										614e29224da4f337b8899b3142d81070_3201	d977e7edc1a56720a787e465ab4ce472_4324	e653c257947c2dd0a414de7cb159ba14_4307			83683a6c7ca473684645e0830a47223d_3991
J7622_08960		AAA family ATPase	4	4	1	1	3190	37	5		1514	1514	1514										614e29224da4f337b8899b3142d81070_6592	d977e7edc1a56720a787e465ab4ce472_6607	e653c257947c2dd0a414de7cb159ba14_6594			83683a6c7ca473684645e0830a47223d_7114
J7547_09750		AAA family ATPase	2	2	1	1	395	1	374		3839	3839	3839					102e21fe2bbcace64a7555dd0bcc9007_7729	4a9cac2c1a817d9acdec143b653b9a80_7709
J7558_06690		AAA family ATPase	1	1	1	1	1414	1	1627		1679	1679	1679			a04b031c37c06570dd644ef46d09ac8c_5324
J7560_06740		AAA family ATPase	1	1	1	1	2611	6	10		1703	1703	1703				2cf5bec40a3ef4476bf46f509f729c16_5339
J7552_01695		AAA family ATPase	1	1	1	1	3372	1	923		1079	1079	1079								197b0243bc5bc4c380ecfb8919a026b1_1348
J7552_07435		AAA family ATPase	1	1	1	1	2304	1	1652		254	254	254								197b0243bc5bc4c380ecfb8919a026b1_5911
J7554_09555		AAA family ATPase	1	1	1	1	2939	1	442		635	635	635									79ccbe49faa72747a800162f6a36c0ca_7572
J7554_09765		AAA family ATPase	1	1	1	1	2480	1	349		1967	1967	1967									79ccbe49faa72747a800162f6a36c0ca_7736
J7560_09650		AAA family ATPase	1	1	1	1	506	1	308		1211	1211	1211				2cf5bec40a3ef4476bf46f509f729c16_7635
A6V30_07825		ABC transporter	1	1	1	1	194	3	31		749	749	749																										A6V30_07825.p01
J7552_06510		ABC transporter ATP-binding protein	9	9	1	1	2669	4	30		641	659	657					102e21fe2bbcace64a7555dd0bcc9007_5470	4a9cac2c1a817d9acdec143b653b9a80_5505		197b0243bc5bc4c380ecfb8919a026b1_5178		614e29224da4f337b8899b3142d81070_6083	d977e7edc1a56720a787e465ab4ce472_6205	e653c257947c2dd0a414de7cb159ba14_6191	31e4ba73e5ddb8c85dea419204f0df5a_5352		83683a6c7ca473684645e0830a47223d_6481			B9T21_07500.p01
B9T12_02710		ABC transporter ATP-binding protein	6	6	1	1	1942	1	1122		1733	1733	1733			a04b031c37c06570dd644ef46d09ac8c_19					197b0243bc5bc4c380ecfb8919a026b1_1308					31e4ba73e5ddb8c85dea419204f0df5a_1080			03da1bd30b32560bef8e38ea7761d9fe_561						B9T12_02710.p01			F387_00340.p01
F387_00339		ABC transporter ATP-binding protein	6	6	1	1	1941	1	1123		1739	1751	1749			a04b031c37c06570dd644ef46d09ac8c_23					197b0243bc5bc4c380ecfb8919a026b1_1304					31e4ba73e5ddb8c85dea419204f0df5a_1084			03da1bd30b32560bef8e38ea7761d9fe_565						B9T12_02705.p01			F387_00339.p01
J7620_09800		ABC transporter ATP-binding protein	3	3	1	1	2958	1	445		764	764	764								197b0243bc5bc4c380ecfb8919a026b1_7747						752b3971131f3206662b5e22da3b23aa_7773										B9T13_10250.p01
J7554_07240		ABC transporter ATP-binding protein	3	3	1	1	1262	5	11		806	806	806									79ccbe49faa72747a800162f6a36c0ca_5758													B9T12_00450.p01	B9T18_04665.p01
J7607_01560		ABC transporter permease	24	24	1	1	1899	1	1163		740	788	775	B9T10_02695.p01	BMY_0405.p01	a04b031c37c06570dd644ef46d09ac8c_175	2cf5bec40a3ef4476bf46f509f729c16_153		4a9cac2c1a817d9acdec143b653b9a80_653	ac8fed72b32d7540cf9a1b9ac12df95a_1145	197b0243bc5bc4c380ecfb8919a026b1_1152	79ccbe49faa72747a800162f6a36c0ca_575	614e29224da4f337b8899b3142d81070_1147	d977e7edc1a56720a787e465ab4ce472_1160	e653c257947c2dd0a414de7cb159ba14_1147	31e4ba73e5ddb8c85dea419204f0df5a_1232	752b3971131f3206662b5e22da3b23aa_579	83683a6c7ca473684645e0830a47223d_1521	03da1bd30b32560bef8e38ea7761d9fe_717		B9T21_02500.p01	B9T15_02020.p01	B9T14_03010.p01	B9T11_00220.p01	B9T12_02510.p01	B9T18_02575.p01	B9T13_02570.p01	F387_00300.p01	A6V30_04135.p01
B9T21_07510		ABC transporter permease	9	9	1	1	2672	4	21		1118	1121	1118					102e21fe2bbcace64a7555dd0bcc9007_5458	4a9cac2c1a817d9acdec143b653b9a80_5493		197b0243bc5bc4c380ecfb8919a026b1_5190		614e29224da4f337b8899b3142d81070_6072	d977e7edc1a56720a787e465ab4ce472_6193	e653c257947c2dd0a414de7cb159ba14_6179	31e4ba73e5ddb8c85dea419204f0df5a_5364		83683a6c7ca473684645e0830a47223d_6493			B9T21_07510.p01
J7600_07655		ABC transporter permease	8	8	1	1	2670	4	23		788	788	788					102e21fe2bbcace64a7555dd0bcc9007_5466	4a9cac2c1a817d9acdec143b653b9a80_5501		197b0243bc5bc4c380ecfb8919a026b1_5182		614e29224da4f337b8899b3142d81070_6079	d977e7edc1a56720a787e465ab4ce472_6201	e653c257947c2dd0a414de7cb159ba14_6187	31e4ba73e5ddb8c85dea419204f0df5a_5356		83683a6c7ca473684645e0830a47223d_6485
B9T18_04675		ABC transporter permease	3	3	1	1	1252	5	9		746	746	746									79ccbe49faa72747a800162f6a36c0ca_5766													B9T12_00440.p01	B9T18_04675.p01
B143_RS09660		ABC transporter permease	1	1	1	1	567	1	1164		776	776	776																	c648bd7c3a222aa51bed3e3836bcf8c8_1627
B9T21_07870		ABC transporter permease	1	1	1	1	2683	108	1		2495	2495	2495																		B9T21_07870.p01
B9T13_10260		ABC transporter substrate-binding protein	4	4	1	1	2956	1	443		779	1016	956								197b0243bc5bc4c380ecfb8919a026b1_7739						752b3971131f3206662b5e22da3b23aa_7781						B9T14_10095.p01				B9T13_10260.p01
B9T18_04670		ABC transporter substrate-binding protein	3	3	1	1	1251	5	10		1172	1172	1172									79ccbe49faa72747a800162f6a36c0ca_5762													B9T12_00445.p01	B9T18_04670.p01
J7620_04155		AbgT family transporter	24	24	1	1	959	239	1		1502	1502	1502	B9T10_08495.p01	BMY_1037.p01	a04b031c37c06570dd644ef46d09ac8c_1691		102e21fe2bbcace64a7555dd0bcc9007_2489	4a9cac2c1a817d9acdec143b653b9a80_2860	ac8fed72b32d7540cf9a1b9ac12df95a_2792	197b0243bc5bc4c380ecfb8919a026b1_1734		614e29224da4f337b8899b3142d81070_2733	d977e7edc1a56720a787e465ab4ce472_3856	e653c257947c2dd0a414de7cb159ba14_3839	31e4ba73e5ddb8c85dea419204f0df5a_2744	752b3971131f3206662b5e22da3b23aa_3297	83683a6c7ca473684645e0830a47223d_4459	03da1bd30b32560bef8e38ea7761d9fe_2489	c648bd7c3a222aa51bed3e3836bcf8c8_5745	B9T21_05750.p01	B9T15_08280.p01	B9T14_08250.p01	B9T11_07155.p01	B9T12_05660.p01	B9T18_08330.p01	B9T13_06945.p01	F387_00509.p01	A6V30_00825.p01
J7558_03470		AbgT family transporter	19	19	1	1	3570	51	3		1511	1571	1564	B9T10_06670.p01	BMY_1688.p01	a04b031c37c06570dd644ef46d09ac8c_2761	2cf5bec40a3ef4476bf46f509f729c16_2727	102e21fe2bbcace64a7555dd0bcc9007_3353	4a9cac2c1a817d9acdec143b653b9a80_3977	ac8fed72b32d7540cf9a1b9ac12df95a_3604		79ccbe49faa72747a800162f6a36c0ca_4000				31e4ba73e5ddb8c85dea419204f0df5a_3903	752b3971131f3206662b5e22da3b23aa_4077		03da1bd30b32560bef8e38ea7761d9fe_3314	c648bd7c3a222aa51bed3e3836bcf8c8_4625	B9T21_04410.p01	B9T15_06545.p01	B9T14_06515.p01	B9T11_03340.p01	B9T12_07295.p01		B9T13_05220.p01	F387_00732.p01
J7553_02880		Abi family protein	5	5	1	1	774	250	1		929	929	929			a04b031c37c06570dd644ef46d09ac8c_2196				ac8fed72b32d7540cf9a1b9ac12df95a_2288							752b3971131f3206662b5e22da3b23aa_2729		03da1bd30b32560bef8e38ea7761d9fe_1945										A6V30_00100.p01
J7547_08045		AbiV family abortive infection protein	2	2	1	1	1142	33	10		638	638	638					102e21fe2bbcace64a7555dd0bcc9007_6395	4a9cac2c1a817d9acdec143b653b9a80_3555
A6V30_08430		acetyltransferase	2	2	1	1	30	1	576		632	632	632														752b3971131f3206662b5e22da3b23aa_5083												A6V30_08430.p01
BMY_0430		Aconitate hydratase 1	2	2	1	1	1921	1	187		1958	2687	2322		BMY_0430.p01																							F387_00322.p01
acnA		aconitate hydratase AcnA	24	24	1	1	1920	1	1143		716	2687	2604	B9T10_02805.p01	BMY_0429.p01	a04b031c37c06570dd644ef46d09ac8c_91	2cf5bec40a3ef4476bf46f509f729c16_69		4a9cac2c1a817d9acdec143b653b9a80_569	ac8fed72b32d7540cf9a1b9ac12df95a_1229	197b0243bc5bc4c380ecfb8919a026b1_1236	79ccbe49faa72747a800162f6a36c0ca_491	614e29224da4f337b8899b3142d81070_1231	d977e7edc1a56720a787e465ab4ce472_1244	e653c257947c2dd0a414de7cb159ba14_1231	31e4ba73e5ddb8c85dea419204f0df5a_1148	752b3971131f3206662b5e22da3b23aa_495	83683a6c7ca473684645e0830a47223d_1437	03da1bd30b32560bef8e38ea7761d9fe_633	c648bd7c3a222aa51bed3e3836bcf8c8_1543	B9T21_02610.p01	B9T15_01910.p01	B9T14_03120.p01	B9T11_00110.p01	B9T12_02620.p01	B9T18_02465.p01	B9T13_02680.p01		A6V30_04245.p01
arsB		ACR3 family arsenite efflux transporter	6	6	1	1	2031	1	457		1034	1034	1034				2cf5bec40a3ef4476bf46f509f729c16_7721				197b0243bc5bc4c380ecfb8919a026b1_7820	79ccbe49faa72747a800162f6a36c0ca_7560									B9T21_09730.p01	B9T15_09980.p01	B9T14_09950.p01
BMY_1650		acyl carrier protein	17	17	1	1	3609	2	7		260	260	260	B9T10_06495.p01	BMY_1650.p01	a04b031c37c06570dd644ef46d09ac8c_2902		102e21fe2bbcace64a7555dd0bcc9007_3212	4a9cac2c1a817d9acdec143b653b9a80_3836	ac8fed72b32d7540cf9a1b9ac12df95a_3744	197b0243bc5bc4c380ecfb8919a026b1_2712					31e4ba73e5ddb8c85dea419204f0df5a_3762			03da1bd30b32560bef8e38ea7761d9fe_3455		B9T21_04235.p01	B9T15_06370.p01	B9T14_06340.p01	B9T11_03515.p01		B9T18_06195.p01	B9T13_05045.p01	F387_00767.p01	A6V30_09205.p01
B9T15_06365		acyl carrier protein	17	17	1	1	3610	2	13		245	245	245	B9T10_06490.p01	BMY_1649.p01	a04b031c37c06570dd644ef46d09ac8c_2906		102e21fe2bbcace64a7555dd0bcc9007_3208	4a9cac2c1a817d9acdec143b653b9a80_3832	ac8fed72b32d7540cf9a1b9ac12df95a_3748	197b0243bc5bc4c380ecfb8919a026b1_2708					31e4ba73e5ddb8c85dea419204f0df5a_3758			03da1bd30b32560bef8e38ea7761d9fe_3459		B9T21_04230.p01	B9T15_06365.p01	B9T14_06335.p01	B9T11_03520.p01		B9T18_06200.p01	B9T13_05040.p01	F387_00768.p01	A6V30_09200.p01
B9T12_00460		acyl-CoA dehydrogenase	3	3	1	1	1264	5	13		1094	1094	1094									79ccbe49faa72747a800162f6a36c0ca_5750													B9T12_00460.p01	B9T18_04655.p01
J7547_06215		acylneuraminate cytidylyltransferase family protein	10	10	1	1	319	1	675		674	737	680					102e21fe2bbcace64a7555dd0bcc9007_4948	4a9cac2c1a817d9acdec143b653b9a80_4759	ac8fed72b32d7540cf9a1b9ac12df95a_5513	197b0243bc5bc4c380ecfb8919a026b1_4703	79ccbe49faa72747a800162f6a36c0ca_4942				31e4ba73e5ddb8c85dea419204f0df5a_6119	752b3971131f3206662b5e22da3b23aa_5023			c648bd7c3a222aa51bed3e3836bcf8c8_3940	B9T21_03485.p01								A6V30_08340.p01
B143_RS0102155		acyltransferase	6	6	1	1	1879	1	1180		998	998	998										614e29224da4f337b8899b3142d81070_1083	d977e7edc1a56720a787e465ab4ce472_1096	e653c257947c2dd0a414de7cb159ba14_1083			83683a6c7ca473684645e0830a47223d_1585		c648bd7c3a222aa51bed3e3836bcf8c8_1691									A6V30_04055.p01
J7602_07845		acyltransferase	4	4	1	1	2780	4	4		596	596	596										614e29224da4f337b8899b3142d81070_6102	d977e7edc1a56720a787e465ab4ce472_6225	e653c257947c2dd0a414de7cb159ba14_6211			83683a6c7ca473684645e0830a47223d_6461
B143_RS0105095		acyltransferase	1	1	1	1	107	1	626		566	566	566																	c648bd7c3a222aa51bed3e3836bcf8c8_3976
B9T10_04115		addiction module protein	1	1	1	1	2256	1	719		1076	1076	1076	B9T10_04115.p01
B9T13_10395		addiction module toxin RelE	7	7	1	1	2984	1	821		257	275	267		BMY_2129.p01			102e21fe2bbcace64a7555dd0bcc9007_7850	4a9cac2c1a817d9acdec143b653b9a80_7956			79ccbe49faa72747a800162f6a36c0ca_7513									B9T21_09695.p01					B9T18_10095.p01	B9T13_10395.p01
B9T15_09880		addiction module toxin RelE	6	6	1	1	2050	1	845		260	260	260					102e21fe2bbcace64a7555dd0bcc9007_7922	4a9cac2c1a817d9acdec143b653b9a80_7928			79ccbe49faa72747a800162f6a36c0ca_7493										B9T15_09880.p01	B9T14_09850.p01						A6V30_10040.p01
B9T18_10070		addiction module toxin RelE	4	4	1	1	2127	1	504		260	260	260			a04b031c37c06570dd644ef46d09ac8c_7933																				B9T18_10070.p01	B9T13_10330.p01	F387_01967.p01
J7552_09855		addiction module toxin RelE	4	4	1	1	2034	1	515		227	281	263								197b0243bc5bc4c380ecfb8919a026b1_7804										B9T21_09750.p01							F387_02044.p01	A6V30_10190.p01
B9T11_10195		addiction module toxin RelE	3	3	1	1	2138	1	492		215	266	249																					B9T11_10195.p01				F387_01958.p01	A6V30_10235.p01
B9T18_10075		addiction module toxin RelE	1	1	1	1	2125	1	503		266	266	266																							B9T18_10075.p01
B9T13_10335		addiction module toxin RelE	1	1	1	1	2126	1	498		266	266	266																								B9T13_10335.p01
A6V30_10295		addiction module toxin RelE	1	1	1	1	2103	1	811		266	266	266																										A6V30_10295.p01
J7620_09825		adhesin	1	1	1	1	2952	1	741		974	974	974														752b3971131f3206662b5e22da3b23aa_7791
J7607_06450		AIDA repeat-containing protein	24	24	1	1	2844	41	7		3111	5531	4469	B9T10_04405.p01	BMY_0711.p01	a04b031c37c06570dd644ef46d09ac8c_5885	2cf5bec40a3ef4476bf46f509f729c16_6141	102e21fe2bbcace64a7555dd0bcc9007_5705		ac8fed72b32d7540cf9a1b9ac12df95a_1765	197b0243bc5bc4c380ecfb8919a026b1_4941	79ccbe49faa72747a800162f6a36c0ca_2160	614e29224da4f337b8899b3142d81070_6314	d977e7edc1a56720a787e465ab4ce472_6436	e653c257947c2dd0a414de7cb159ba14_6423	31e4ba73e5ddb8c85dea419204f0df5a_5125	752b3971131f3206662b5e22da3b23aa_2166	83683a6c7ca473684645e0830a47223d_6250	03da1bd30b32560bef8e38ea7761d9fe_5265	c648bd7c3a222aa51bed3e3836bcf8c8_561	B9T21_07185.p01	B9T15_00705.p01	B9T14_04325.p01	B9T11_05665.p01	B9T12_04015.p01	B9T18_00700.p01	B9T13_08340.p01		A6V30_05235.p01
J7554_02590		alcohol dehydrogenase	9	9	1	1	2604	23	3		1328	1328	1328				2cf5bec40a3ef4476bf46f509f729c16_5409					79ccbe49faa72747a800162f6a36c0ca_2056									B9T21_07050.p01	B9T15_00840.p01	B9T14_04190.p01	B9T11_05530.p01	B9T12_04150.p01		B9T13_08205.p01	F387_01738.p01
J7622_08700		aldehyde dehydrogenase family protein	13	13	1	1	2996	40	2		1445	1445	1445		BMY_1352.p01		2cf5bec40a3ef4476bf46f509f729c16_6501				197b0243bc5bc4c380ecfb8919a026b1_6856		614e29224da4f337b8899b3142d81070_6384	d977e7edc1a56720a787e465ab4ce472_6813	e653c257947c2dd0a414de7cb159ba14_6801		752b3971131f3206662b5e22da3b23aa_6014	83683a6c7ca473684645e0830a47223d_6909				B9T15_09165.p01	B9T14_09135.p01	B9T11_09525.p01			B9T13_09110.p01	F387_01349.p01
J7607_06015		aldehyde dehydrogenase family protein	1	1	1	1	675	7	17		1493	1493	1493													31e4ba73e5ddb8c85dea419204f0df5a_4780
J7554_07225		alkylhydroperoxidase	3	3	1	1	1265	5	14		548	548	548									79ccbe49faa72747a800162f6a36c0ca_5746													B9T12_00465.p01	B9T18_04650.p01
A6V30_07765		alkylphosphonate utilization protein	1	1	1	1	182	3	37		326	326	326																										A6V30_07765.p01
J7553_06095		AlpA family phage regulatory protein	6	6	1	1	1513	1	1583		281	281	281				2cf5bec40a3ef4476bf46f509f729c16_3839			ac8fed72b32d7540cf9a1b9ac12df95a_4839							752b3971131f3206662b5e22da3b23aa_7570		03da1bd30b32560bef8e38ea7761d9fe_3900			B9T15_03960.p01	B9T14_01080.p01
J7552_01700		AlpA family phage regulatory protein	1	1	1	1	3371	1	922		266	266	266								197b0243bc5bc4c380ecfb8919a026b1_1352
J7552_09465		AlpA family phage regulatory protein	1	1	1	1	2022	1	1681		239	239	239								197b0243bc5bc4c380ecfb8919a026b1_7510
B9T13_10150		alpha/beta fold putative hydrolase EstX	1	1	1	1	2232	1	526		1097	1097	1097																								B9T13_10150.p01
B9T21_04555		amino acid permease	13	13	1	1	3537	12	1		1469	1469	1469			a04b031c37c06570dd644ef46d09ac8c_2636		102e21fe2bbcace64a7555dd0bcc9007_3474	4a9cac2c1a817d9acdec143b653b9a80_4098	ac8fed72b32d7540cf9a1b9ac12df95a_3479							752b3971131f3206662b5e22da3b23aa_4198		03da1bd30b32560bef8e38ea7761d9fe_3189	c648bd7c3a222aa51bed3e3836bcf8c8_4746	B9T21_04555.p01	B9T15_06690.p01	B9T14_06660.p01	B9T11_03195.p01			B9T13_05365.p01	F387_00701.p01
B9T12_05945		amino acid permease	9	9	1	1	1022	32	1		1196	1268	1260	B9T10_08785.p01	BMY_0977.p01			102e21fe2bbcace64a7555dd0bcc9007_2722	4a9cac2c1a817d9acdec143b653b9a80_3093				614e29224da4f337b8899b3142d81070_2504	d977e7edc1a56720a787e465ab4ce472_3627	e653c257947c2dd0a414de7cb159ba14_3610			83683a6c7ca473684645e0830a47223d_4688							B9T12_05945.p01
J7547_03425		amino acid permease	9	9	1	1	713	32	3		1445	1496	1490	B9T10_08790.p01	BMY_0976.p01			102e21fe2bbcace64a7555dd0bcc9007_2726	4a9cac2c1a817d9acdec143b653b9a80_3097				614e29224da4f337b8899b3142d81070_2500	d977e7edc1a56720a787e465ab4ce472_3623	e653c257947c2dd0a414de7cb159ba14_3606			83683a6c7ca473684645e0830a47223d_4692							B9T12_05950.p01
B9T18_01020		amino acid permease	2	2	1	1	2927	1	703		1457	1457	1457									79ccbe49faa72747a800162f6a36c0ca_1948														B9T18_01020.p01
J7553_02215		amino acid permease	1	1	1	1	2644	41	1		1466	1466	1466							ac8fed72b32d7540cf9a1b9ac12df95a_1757
B9T18_10040		amino acid-binding protein	2	2	1	1	2969	1	429		386	386	386																							B9T18_10040.p01	B9T13_10280.p01
BMY_2147		aminoglycoside N-acetyltransferase AAC(6')-Ia	1	1	1	1	2908	1	419		584	584	584		BMY_2147.p01
BMY_2146		aminoglycoside nucleotidyltransferase ANT(2'')-Ia	1	1	1	1	2909	1	418		533	533	533		BMY_2146.p01
B9T13_10170		aminoglycoside O-phosphotransferase APH(3')-Ia	2	2	1	1	2228	1	525		815	815	815																							B9T18_10175.p01	B9T13_10170.p01
B9T18_10160		aminoglycoside O-phosphotransferase APH(3'')-Ib	4	4	1	1	2234	1	530		803	803	803																			B9T15_10100.p01	B9T14_10070.p01			B9T18_10160.p01	B9T13_10145.p01
B9T15_10095		aminoglycoside O-phosphotransferase APH(6)-Id	3	3	1	1	2230	1	529		836	836	836																			B9T15_10095.p01	B9T14_10065.p01			B9T18_10165.p01
J7620_06395		aminotransferase	2	2	1	1	31	1	575		1178	1178	1178														752b3971131f3206662b5e22da3b23aa_5079												A6V30_08425.p01
A6V30_08475		aminotransferase	1	1	1	1	2248	1	585		1118	1118	1118																										A6V30_08475.p01
J7560_07185		ankyrin repeat domain-containing protein	2	2	1	1	2535	48	4		2462	2774	2618				2cf5bec40a3ef4476bf46f509f729c16_5690				197b0243bc5bc4c380ecfb8919a026b1_5939
J7624_09490		antA/AntB antirepressor family protein	1	1	1	1	2422	1	1766		860	860	860																03da1bd30b32560bef8e38ea7761d9fe_7527
B9T13_10275		antibiotic biosynthesis monooxygenase	2	2	1	1	2971	1	430		320	320	320																							B9T18_10035.p01	B9T13_10275.p01
J7607_05995		APC family permease	1	1	1	1	679	7	21		1433	1433	1433													31e4ba73e5ddb8c85dea419204f0df5a_4764
B9T12_03300		AraC family transcriptional regulator	1	1	1	1	1973	1	1260		785	785	785																						B9T12_03300.p01
J7554_02445		arginine:agmatine antiporter	2	2	1	1	2591	1	704		1508	1508	1508									79ccbe49faa72747a800162f6a36c0ca_1944														B9T18_01025.p01
B9T21_06230		arsenate reductase	1	1	1	1	711	232	1		368	368	368																		B9T21_06230.p01
arsC		arsenate reductase (glutaredoxin)	6	6	1	1	3257	1	454		413	413	413				2cf5bec40a3ef4476bf46f509f729c16_7709				197b0243bc5bc4c380ecfb8919a026b1_7832	79ccbe49faa72747a800162f6a36c0ca_7549									B9T21_09715.p01	B9T15_09965.p01	B9T14_09935.p01
arsA		arsenical pump-driving ATPase	6	6	1	1	2030	1	456		1751	1751	1751				2cf5bec40a3ef4476bf46f509f729c16_7717				197b0243bc5bc4c380ecfb8919a026b1_7824	79ccbe49faa72747a800162f6a36c0ca_7556									B9T21_09725.p01	B9T15_09975.p01	B9T14_09945.p01
arsD		arsenical resistance operon transcriptional repressor ArsD	6	6	1	1	2029	1	455		347	350	348				2cf5bec40a3ef4476bf46f509f729c16_7713				197b0243bc5bc4c380ecfb8919a026b1_7828	79ccbe49faa72747a800162f6a36c0ca_7553									B9T21_09720.p01	B9T15_09970.p01	B9T14_09940.p01
asnB		asparagine synthase (glutamine-hydrolyzing)	5	5	1	1	4	1	538		1892	1892	1892									79ccbe49faa72747a800162f6a36c0ca_5030	614e29224da4f337b8899b3142d81070_4639	d977e7edc1a56720a787e465ab4ce472_5062	e653c257947c2dd0a414de7cb159ba14_4739			83683a6c7ca473684645e0830a47223d_5373
A6V30_08460		asparagine synthetase B	1	1	1	1	2245	1	582		1895	1895	1895																										A6V30_08460.p01
B9T13_01970		assembly protein	2	2	1	1	614	1	1391		977	977	977																	c648bd7c3a222aa51bed3e3836bcf8c8_2261							B9T13_01970.p01
J7561_07830		ATP/GTP-binding protein	4	4	1	1	809	1	322		1532	1532	1532					102e21fe2bbcace64a7555dd0bcc9007_2001	4a9cac2c1a817d9acdec143b653b9a80_6226															B9T11_07755.p01		B9T18_07745.p01
B9T10_07900		ATPase	2	2	1	1	814	1	294		1541	1589	1565	B9T10_07900.p01																						B9T18_07735.p01
J7560_01880		ATP-binding cassette domain-containing protein	1	1	1	1	841	1	265		2114	2114	2114				2cf5bec40a3ef4476bf46f509f729c16_1495
J7552_02895		ATP-binding protein	8	8	1	1	769	42	1		1754	1883	1786	B9T10_07725.p01		a04b031c37c06570dd644ef46d09ac8c_2212	2cf5bec40a3ef4476bf46f509f729c16_1360				197b0243bc5bc4c380ecfb8919a026b1_2299					31e4ba73e5ddb8c85dea419204f0df5a_3353	752b3971131f3206662b5e22da3b23aa_2712		03da1bd30b32560bef8e38ea7761d9fe_1928		B9T21_05090.p01
BMY_0184		ATP-binding protein	5	5	1	1	1616	1	155		1241	1241	1241	B9T10_01540.p01	BMY_0184.p01	a04b031c37c06570dd644ef46d09ac8c_955	2cf5bec40a3ef4476bf46f509f729c16_933												03da1bd30b32560bef8e38ea7761d9fe_1497
B9T18_03670		ATP-binding protein	4	4	1	1	1587	1	152		1871	1871	1871			a04b031c37c06570dd644ef46d09ac8c_1055													03da1bd30b32560bef8e38ea7761d9fe_1597							B9T18_03670.p01		F387_00073.p01
J7552_01900		ATP-binding protein	4	4	1	1	1020	52	3		1211	1211	1211								197b0243bc5bc4c380ecfb8919a026b1_1509	79ccbe49faa72747a800162f6a36c0ca_3414				31e4ba73e5ddb8c85dea419204f0df5a_2519					B9T21_06030.p01
J7553_06055		ATP-binding protein	2	2	1	1	1505	1	128		779	779	779							ac8fed72b32d7540cf9a1b9ac12df95a_4806		79ccbe49faa72747a800162f6a36c0ca_6985
J7607_00760		ATP-binding protein	1	1	1	1	2487	1	1772		1892	1892	1892													31e4ba73e5ddb8c85dea419204f0df5a_600
J7624_09745		ATP-binding protein	1	1	1	1	543	1	101		896	896	896																03da1bd30b32560bef8e38ea7761d9fe_7730
J7561_09705		ATP-dependent Clp protease ATP-binding subunit	2	2	1	1	398	1	377		1850	1850	1850					102e21fe2bbcace64a7555dd0bcc9007_7741	4a9cac2c1a817d9acdec143b653b9a80_7698
J7560_06745		ATP-dependent helicase	1	1	1	1	2612	6	9		1610	1610	1610				2cf5bec40a3ef4476bf46f509f729c16_5343
J7554_09770		ATP-dependent helicase	1	1	1	1	2479	1	348		1652	1652	1652									79ccbe49faa72747a800162f6a36c0ca_7740
B9T14_01405		autotransporter outer membrane beta-barrel domain-containing protein	23	23	1	1	1517	1	1579		2417	4313	3931	B9T10_01075.p01		a04b031c37c06570dd644ef46d09ac8c_7979	2cf5bec40a3ef4476bf46f509f729c16_7665	102e21fe2bbcace64a7555dd0bcc9007_3805	4a9cac2c1a817d9acdec143b653b9a80_1799	ac8fed72b32d7540cf9a1b9ac12df95a_3	197b0243bc5bc4c380ecfb8919a026b1_12	79ccbe49faa72747a800162f6a36c0ca_1721	614e29224da4f337b8899b3142d81070_7971	d977e7edc1a56720a787e465ab4ce472_12	e653c257947c2dd0a414de7cb159ba14_8013	31e4ba73e5ddb8c85dea419204f0df5a_4385	752b3971131f3206662b5e22da3b23aa_7295	83683a6c7ca473684645e0830a47223d_2669	03da1bd30b32560bef8e38ea7761d9fe_7768	c648bd7c3a222aa51bed3e3836bcf8c8_2955	B9T21_01075.p01	B9T15_03635.p01	B9T14_01405.p01	B9T11_01655.p01	B9T12_01090.p01	B9T18_04015.p01	B9T13_01090.p01
B9T15_02620		autotransporter outer membrane beta-barrel domain-containing protein	17	17	1	1	1736	1	1357		1115	3884	3671						4a9cac2c1a817d9acdec143b653b9a80_984	ac8fed72b32d7540cf9a1b9ac12df95a_814		79ccbe49faa72747a800162f6a36c0ca_906	614e29224da4f337b8899b3142d81070_814	d977e7edc1a56720a787e465ab4ce472_827	e653c257947c2dd0a414de7cb159ba14_814	31e4ba73e5ddb8c85dea419204f0df5a_1565	752b3971131f3206662b5e22da3b23aa_910	83683a6c7ca473684645e0830a47223d_1854		c648bd7c3a222aa51bed3e3836bcf8c8_2112	B9T21_02090.p01	B9T15_02620.p01	B9T14_02420.p01	B9T11_00640.p01	B9T12_02110.p01		B9T13_02160.p01		A6V30_03710.p01
J7607_01345		autotransporter outer membrane beta-barrel domain-containing protein	3	3	1	1	3378	1	929		5768	12803	9731			a04b031c37c06570dd644ef46d09ac8c_3					197b0243bc5bc4c380ecfb8919a026b1_1324					31e4ba73e5ddb8c85dea419204f0df5a_1064
J7547_09850		autotransporter outer membrane beta-barrel domain-containing protein	3	3	1	1	2645	41	3		1754	5099	2957					102e21fe2bbcace64a7555dd0bcc9007_7801	4a9cac2c1a817d9acdec143b653b9a80_5741							31e4ba73e5ddb8c85dea419204f0df5a_7910
J7553_01820		autotransporter outer membrane beta-barrel domain-containing protein	1	1	1	1	2266	44	1		7253	7253	7253							ac8fed72b32d7540cf9a1b9ac12df95a_1443
A6V30_07775		bacterioferritin	1	1	1	1	184	3	39		209	209	209																										A6V30_07775.p01
F387_01498		Bactoprenol glucosyl transferase	1	1	1	1	3719	25	2		926	926	926																									F387_01498.p01
F387_01497		Bactoprenol-linked glucose translocase-like protein	1	1	1	1	3720	25	1		344	344	344																									F387_01497.p01
J7554_02700		BapA prefix-like domain-containing protein	1	1	1	1	2641	29	3		5078	5078	5078									79ccbe49faa72747a800162f6a36c0ca_2144
J7620_02740		BapA prefix-like domain-containing protein	1	1	1	1	2855	29	2		4832	4832	4832														752b3971131f3206662b5e22da3b23aa_2178
J7600_02760		baseplate J/gp47 family protein	13	13	1	1	578	1	1316		896	896	896	B9T10_02285.p01		a04b031c37c06570dd644ef46d09ac8c_5495							614e29224da4f337b8899b3142d81070_2195	d977e7edc1a56720a787e465ab4ce472_2208	e653c257947c2dd0a414de7cb159ba14_2195			83683a6c7ca473684645e0830a47223d_473	03da1bd30b32560bef8e38ea7761d9fe_7630	c648bd7c3a222aa51bed3e3836bcf8c8_1960		B9T15_02435.p01	B9T14_02600.p01	B9T11_08690.p01		B9T18_01645.p01			A6V30_07090.p01
J7602_01645		BCCT family transporter	10	10	1	1	552	1	1112		1541	1544	1541	B9T10_02885.p01					4a9cac2c1a817d9acdec143b653b9a80_505				614e29224da4f337b8899b3142d81070_1293	d977e7edc1a56720a787e465ab4ce472_1306	e653c257947c2dd0a414de7cb159ba14_1293			83683a6c7ca473684645e0830a47223d_1375		c648bd7c3a222aa51bed3e3836bcf8c8_1479	B9T21_02690.p01					B9T18_02400.p01			A6V30_04310.p01
J7607_06035		Bcr/CflA family multidrug efflux MFS transporter	1	1	1	1	671	7	13		1199	1199	1199													31e4ba73e5ddb8c85dea419204f0df5a_4796
A6V30_09150		beta-ketoacyl-[acyl-carrier-protein] synthase II	17	17	1	1	3626	2	22		1187	1187	1187	B9T10_06440.p01	BMY_1639.p01	a04b031c37c06570dd644ef46d09ac8c_2946		102e21fe2bbcace64a7555dd0bcc9007_3168	4a9cac2c1a817d9acdec143b653b9a80_3792	ac8fed72b32d7540cf9a1b9ac12df95a_3788	197b0243bc5bc4c380ecfb8919a026b1_2668					31e4ba73e5ddb8c85dea419204f0df5a_3718			03da1bd30b32560bef8e38ea7761d9fe_3499		B9T21_04180.p01	B9T15_06315.p01	B9T14_06285.p01	B9T11_03570.p01		B9T18_06250.p01	B9T13_04990.p01	F387_00778.p01	A6V30_09150.p01
B9T18_06265		beta-ketoacyl-ACP synthase II	17	17	1	1	3629	2	19		1226	1226	1226	B9T10_06425.p01	BMY_1636.p01	a04b031c37c06570dd644ef46d09ac8c_2958		102e21fe2bbcace64a7555dd0bcc9007_3156	4a9cac2c1a817d9acdec143b653b9a80_3780	ac8fed72b32d7540cf9a1b9ac12df95a_3800	197b0243bc5bc4c380ecfb8919a026b1_2656					31e4ba73e5ddb8c85dea419204f0df5a_3706			03da1bd30b32560bef8e38ea7761d9fe_3511		B9T21_04165.p01	B9T15_06300.p01	B9T14_06270.p01	B9T11_03585.p01		B9T18_06265.p01	B9T13_04975.p01	F387_00781.p01	A6V30_09135.p01
J7606_01185		bifunctional 2',3'-cyclic-nucleotide 2'-phosphodiesterase/3'-nucleotidase	24	24	1	1	1843	1	1221		1184	1826	1799	B9T10_02450.p01	BMY_0351.p01	a04b031c37c06570dd644ef46d09ac8c_375	2cf5bec40a3ef4476bf46f509f729c16_353		4a9cac2c1a817d9acdec143b653b9a80_853	ac8fed72b32d7540cf9a1b9ac12df95a_945	197b0243bc5bc4c380ecfb8919a026b1_952	79ccbe49faa72747a800162f6a36c0ca_775	614e29224da4f337b8899b3142d81070_943	d977e7edc1a56720a787e465ab4ce472_956	e653c257947c2dd0a414de7cb159ba14_943	31e4ba73e5ddb8c85dea419204f0df5a_1432	752b3971131f3206662b5e22da3b23aa_779	83683a6c7ca473684645e0830a47223d_1725	03da1bd30b32560bef8e38ea7761d9fe_917		B9T21_02255.p01	B9T15_02270.p01	B9T14_02765.p01	B9T11_00470.p01	B9T12_02265.p01	B9T18_02825.p01	B9T13_02325.p01	F387_00246.p01	A6V30_03880.p01
BMY_1668		bifunctional 3,4-dihydroxy-2-butanone 4-phosphate synthase/GTP cyclohydrolase II	1	1	1	1	385	246	1		875	875	875		BMY_1668.p01
A6V30_07790		bifunctional heptose 7-phosphate kinase/heptose 1-phosphate adenyltransferase	1	1	1	1	187	3	42		1412	1412	1412																										A6V30_07790.p01
group_2236	trpCF	bifunctional indole-3-glycerol-phosphate synthase TrpC/phosphoribosylanthranilate isomerase TrpF	1	1	1	1	1242	263	1		1373	1373	1373							ac8fed72b32d7540cf9a1b9ac12df95a_5365
BMY_0350		bifunctional metallophosphatase/5'-nucleotidase	1	1	1	1	1840	1	181		395	395	395		BMY_0350.p01
BMY_0349		bifunctional metallophosphatase/5'-nucleotidase	1	1	1	1	1841	1	180		251	251	251		BMY_0349.p01
J7602_04960		biopolymer transporter ExbD	16	16	1	1	720	30	2		431	431	431	B9T10_08390.p01		a04b031c37c06570dd644ef46d09ac8c_1773		102e21fe2bbcace64a7555dd0bcc9007_2407	4a9cac2c1a817d9acdec143b653b9a80_2778			79ccbe49faa72747a800162f6a36c0ca_3105	614e29224da4f337b8899b3142d81070_2815	d977e7edc1a56720a787e465ab4ce472_3938	e653c257947c2dd0a414de7cb159ba14_3921			83683a6c7ca473684645e0830a47223d_4377		c648bd7c3a222aa51bed3e3836bcf8c8_5827	B9T21_05645.p01	B9T15_08175.p01	B9T14_08145.p01	B9T11_07260.p01			B9T13_06840.p01		A6V30_00720.p01
J7553_03415		biopolymer transporter ExbD	10	10	1	1	939	36	3		440	443	440		BMY_1058.p01		2cf5bec40a3ef4476bf46f509f729c16_1871			ac8fed72b32d7540cf9a1b9ac12df95a_2710	197b0243bc5bc4c380ecfb8919a026b1_1816					31e4ba73e5ddb8c85dea419204f0df5a_2826	752b3971131f3206662b5e22da3b23aa_3215		03da1bd30b32560bef8e38ea7761d9fe_2407						B9T12_05555.p01	B9T18_08225.p01		F387_00530.p01
J7620_09280		C40 family peptidase	11	11	1	1	2399	1	27		707	707	707	B9T10_03580.p01		a04b031c37c06570dd644ef46d09ac8c_4547				ac8fed72b32d7540cf9a1b9ac12df95a_4160			614e29224da4f337b8899b3142d81070_1851	d977e7edc1a56720a787e465ab4ce472_1864	e653c257947c2dd0a414de7cb159ba14_1851		752b3971131f3206662b5e22da3b23aa_7368	83683a6c7ca473684645e0830a47223d_817			B9T21_02820.p01			B9T11_04870.p01	B9T12_04835.p01
J7553_09805		C40 family peptidase	6	6	1	1	2428	1	1752		698	698	698							ac8fed72b32d7540cf9a1b9ac12df95a_7765		79ccbe49faa72747a800162f6a36c0ca_6849							03da1bd30b32560bef8e38ea7761d9fe_7539					B9T11_07780.p01		B9T18_01535.p01	B9T13_02795.p01
J7607_00770		C40 family peptidase	1	1	1	1	2489	1	951		422	422	422													31e4ba73e5ddb8c85dea419204f0df5a_608
B9T13_09865		cadherin domain-containing protein	3	3	1	1	515	1	213		4637	6497	5430				2cf5bec40a3ef4476bf46f509f729c16_7603												03da1bd30b32560bef8e38ea7761d9fe_7678								B9T13_09865.p01
J7547_07175		cadherin domain-containing protein	1	1	1	1	2856	273	1		4541	4541	4541					102e21fe2bbcace64a7555dd0bcc9007_5709
J7558_07390		cadherin-like domain-containing protein	6	6	1	1	2639	29	4		520	6263	2274	B9T10_04390.p01		a04b031c37c06570dd644ef46d09ac8c_5873		102e21fe2bbcace64a7555dd0bcc9007_7817	4a9cac2c1a817d9acdec143b653b9a80_5757										03da1bd30b32560bef8e38ea7761d9fe_5253							B9T18_00715.p01
J7600_10120		cadherin-like domain-containing protein	1	1	1	40	1	124	1	Investigate	493	493	493										614e29224da4f337b8899b3142d81070_8024
J7624_10190		cadherin-like domain-containing protein	1	1	1	17	1	93	1	Investigate	415	415	415																03da1bd30b32560bef8e38ea7761d9fe_8072
J7624_10200		cadherin-like domain-containing protein	1	1	1	27	1	119	1	Investigate	325	325	325																03da1bd30b32560bef8e38ea7761d9fe_8080
J7600_07640		capsular biosynthesis protein	9	9	1	1	2673	4	20		1211	1295	1220					102e21fe2bbcace64a7555dd0bcc9007_5454	4a9cac2c1a817d9acdec143b653b9a80_5489		197b0243bc5bc4c380ecfb8919a026b1_5194		614e29224da4f337b8899b3142d81070_6068	d977e7edc1a56720a787e465ab4ce472_6189	e653c257947c2dd0a414de7cb159ba14_6175	31e4ba73e5ddb8c85dea419204f0df5a_5368		83683a6c7ca473684645e0830a47223d_6497			B9T21_07515.p01
B9T10_05790		capsular biosynthesis protein	3	3	1	1	37	1	560		1127	1127	1127	B9T10_05790.p01													752b3971131f3206662b5e22da3b23aa_5099										B9T13_04280.p01
J7606_07830		capsular polysaccharide biosynthesis protein	5	5	1	1	2781	4	8		1109	1112	1109										614e29224da4f337b8899b3142d81070_6106	d977e7edc1a56720a787e465ab4ce472_6229	e653c257947c2dd0a414de7cb159ba14_6215			83683a6c7ca473684645e0830a47223d_6457			B9T21_07460.p01
J7600_07695		capsular polysaccharide biosynthesis protein	5	5	1	1	2782	4	9		2036	2036	2036										614e29224da4f337b8899b3142d81070_6110	d977e7edc1a56720a787e465ab4ce472_6232	e653c257947c2dd0a414de7cb159ba14_6219			83683a6c7ca473684645e0830a47223d_6453			B9T21_07455.p01
J7547_06910		capsular polysaccharide biosynthesis protein	2	2	1	1	2787	4	13		2036	2036	2036					102e21fe2bbcace64a7555dd0bcc9007_5498	4a9cac2c1a817d9acdec143b653b9a80_5533
J7552_06470		capsular polysaccharide biosynthesis protein	1	1	1	1	2654	4	11		2018	2018	2018								197b0243bc5bc4c380ecfb8919a026b1_5146
J7607_06710		capsular polysaccharide biosynthesis protein	1	1	1	1	2778	4	25		2036	2036	2036													31e4ba73e5ddb8c85dea419204f0df5a_5333
A6V30_08500		carboxylate--amine ligase	1	1	1	1	2242	1	693		1061	1061	1061																										A6V30_08500.p01
nadC		carboxylating nicotinate-nucleotide diphosphorylase	18	18	1	1	1934	1	1130		854	857	856	B9T10_02855.p01	BMY_0445.p01	a04b031c37c06570dd644ef46d09ac8c_51	2cf5bec40a3ef4476bf46f509f729c16_29		4a9cac2c1a817d9acdec143b653b9a80_529	ac8fed72b32d7540cf9a1b9ac12df95a_1269	197b0243bc5bc4c380ecfb8919a026b1_1276		614e29224da4f337b8899b3142d81070_1271	d977e7edc1a56720a787e465ab4ce472_1284	e653c257947c2dd0a414de7cb159ba14_1271	31e4ba73e5ddb8c85dea419204f0df5a_1108	752b3971131f3206662b5e22da3b23aa_455	83683a6c7ca473684645e0830a47223d_1397	03da1bd30b32560bef8e38ea7761d9fe_593	c648bd7c3a222aa51bed3e3836bcf8c8_1503	B9T21_02660.p01				B9T12_02670.p01			F387_00332.p01
B9T18_01560		carboxypeptidase regulatory-like domain-containing protein	2	2	1	1	2436	1	1743		779	779	779							ac8fed72b32d7540cf9a1b9ac12df95a_7785																B9T18_01560.p01
J7620_09255		carboxypeptidase regulatory-like domain-containing protein	1	1	1	1	2310	1	79		779	779	779														752b3971131f3206662b5e22da3b23aa_7348
J7560_01690		cation-translocating P-type ATPase	9	9	1	1	751	86	1		1247	2177	2073	B9T10_07705.p01	BMY_1187.p01	a04b031c37c06570dd644ef46d09ac8c_2228	2cf5bec40a3ef4476bf46f509f729c16_1344				197b0243bc5bc4c380ecfb8919a026b1_2315					31e4ba73e5ddb8c85dea419204f0df5a_3369	752b3971131f3206662b5e22da3b23aa_2696		03da1bd30b32560bef8e38ea7761d9fe_1912		B9T21_05070.p01
J7607_06725		CDP-glycerol glycerophosphotransferase family protein	1	1	1	1	2664	4	28		3737	3737	3737													31e4ba73e5ddb8c85dea419204f0df5a_5344
BMY_1820		cell division protein FtsW	1	1	1	1	421	154	1		986	986	986		BMY_1820.p01
B9T21_06500		cell envelope biogenesis protein OmpA	1	1	1	1	1125	64	2		713	713	713																		B9T21_06500.p01
tolA		cell envelope integrity protein TolA	16	16	1	1	941	30	1		1079	1127	1082	B9T10_08395.p01		a04b031c37c06570dd644ef46d09ac8c_1769		102e21fe2bbcace64a7555dd0bcc9007_2411	4a9cac2c1a817d9acdec143b653b9a80_2782			79ccbe49faa72747a800162f6a36c0ca_3109	614e29224da4f337b8899b3142d81070_2811	d977e7edc1a56720a787e465ab4ce472_3934	e653c257947c2dd0a414de7cb159ba14_3917			83683a6c7ca473684645e0830a47223d_4381		c648bd7c3a222aa51bed3e3836bcf8c8_5823	B9T21_05650.p01	B9T15_08180.p01	B9T14_08150.p01	B9T11_07255.p01			B9T13_06845.p01		A6V30_00725.p01
group_1292	tolA	cell envelope integrity protein TolA	9	9	1	1	940	36	2		1061	1085	1082		BMY_1057.p01					ac8fed72b32d7540cf9a1b9ac12df95a_2714	197b0243bc5bc4c380ecfb8919a026b1_1812					31e4ba73e5ddb8c85dea419204f0df5a_2822	752b3971131f3206662b5e22da3b23aa_3219		03da1bd30b32560bef8e38ea7761d9fe_2411						B9T12_05560.p01	B9T18_08230.p01		F387_00529.p01
B9T13_04595		cell filamentation protein Fic	1	1	1	1	370	34	10		1154	1154	1154																								B9T13_04595.p01
capV		cGAMP-activated phospholipase CapV	1	1	1	1	2628	6	19		1064	1064	1064				2cf5bec40a3ef4476bf46f509f729c16_5301
A6V30_07860		chromosome partitioning protein	1	1	1	1	201	3	24		773	773	773																										A6V30_07860.p01
J7607_10065		chromosome partitioning protein ParB	2	2	1	4	1	62	1	Investigate	191	191	191				2cf5bec40a3ef4476bf46f509f729c16_7886									31e4ba73e5ddb8c85dea419204f0df5a_7977
BMY_1398		chromosome partitioning protein ParB	1	1	1	1	132	74	2		869	869	869		BMY_1398.p01
A6V30_07865		chromosome partitioning protein ParB	1	1	1	1	202	3	23		896	896	896																										A6V30_07865.p01
BMY_0158		chromosome segregation protein SMC	1	1	1	1	633	1	1508		128	128	128		BMY_0158.p01
B9T21_05155		citrate transporter	1	1	1	1	783	153	1		1322	1322	1322																		B9T21_05155.p01
BMY_2145		class A extended-spectrum beta-lactamase VEB-1	1	1	1	1	2910	1	417		899	899	899		BMY_2145.p01
J7547_08030		class I SAM-dependent DNA methyltransferase	2	2	1	1	1145	33	7		2759	2759	2759					102e21fe2bbcace64a7555dd0bcc9007_6383	4a9cac2c1a817d9acdec143b653b9a80_3543
B9T21_05195		class I SAM-dependent methyltransferase	7	7	1	1	792	1	298		590	590	590			a04b031c37c06570dd644ef46d09ac8c_2131				ac8fed72b32d7540cf9a1b9ac12df95a_2352		79ccbe49faa72747a800162f6a36c0ca_2747							03da1bd30b32560bef8e38ea7761d9fe_2009	c648bd7c3a222aa51bed3e3836bcf8c8_6181	B9T21_05195.p01					B9T18_07720.p01
J7552_05890		class I SAM-dependent methyltransferase	2	2	1	1	315	1	690		752	752	752								197b0243bc5bc4c380ecfb8919a026b1_4687					31e4ba73e5ddb8c85dea419204f0df5a_6103
J7607_00695		Clp protease ClpP	9	9	1	1	2342	1	1786		809	809	809			a04b031c37c06570dd644ef46d09ac8c_7893				ac8fed72b32d7540cf9a1b9ac12df95a_7698		79ccbe49faa72747a800162f6a36c0ca_6912				31e4ba73e5ddb8c85dea419204f0df5a_548	752b3971131f3206662b5e22da3b23aa_7701		03da1bd30b32560bef8e38ea7761d9fe_7471					B9T11_07860.p01		B9T18_01455.p01	B9T13_02875.p01
A6V30_07755		cobalamin adenosyltransferase	1	1	1	1	180	3	35		557	557	557																										A6V30_07755.p01
J7553_08695		Coenzyme F420 hydrogenase/dehydrogenase, beta subunit C-terminal domain	1	1	1	1	325	1	631		1391	1391	1391							ac8fed72b32d7540cf9a1b9ac12df95a_6901
J7622_00735		Com family DNA-binding transcriptional regulator	8	8	1	1	1816	1	1265		149	149	149			a04b031c37c06570dd644ef46d09ac8c_5395							614e29224da4f337b8899b3142d81070_2087	d977e7edc1a56720a787e465ab4ce472_2100	e653c257947c2dd0a414de7cb159ba14_2087			83683a6c7ca473684645e0830a47223d_581	03da1bd30b32560bef8e38ea7761d9fe_59					B9T11_08580.p01		B9T18_01750.p01
B9T15_03835		Com family DNA-binding transcriptional regulator	7	7	1	1	2325	1	1815		131	131	131			a04b031c37c06570dd644ef46d09ac8c_8020				ac8fed72b32d7540cf9a1b9ac12df95a_7912							752b3971131f3206662b5e22da3b23aa_7942		03da1bd30b32560bef8e38ea7761d9fe_8036		B9T21_09915.p01	B9T15_03835.p01	B9T14_01205.p01
J7602_02470		Com family DNA-binding transcriptional regulator	6	6	1	1	2364	1	1829		131	131	131										614e29224da4f337b8899b3142d81070_1951	d977e7edc1a56720a787e465ab4ce472_1964	e653c257947c2dd0a414de7cb159ba14_1951			83683a6c7ca473684645e0830a47223d_717			B9T21_09970.p01						B9T13_09935.p01
BMY_1431		competence protein ComM	2	2	1	1	122	31	2		707	1493	1100		BMY_1431.p01						197b0243bc5bc4c380ecfb8919a026b1_4373
B9T11_10190		CopG family transcriptional regulator	4	4	1	1	3254	1	491		224	224	224							ac8fed72b32d7540cf9a1b9ac12df95a_7827														B9T11_10190.p01				F387_01959.p01	A6V30_10230.p01
J7552_09860		CopG family transcriptional regulator	4	4	1	1	2035	1	471		57	224	182								197b0243bc5bc4c380ecfb8919a026b1_7808										B9T21_09745.p01							F387_02039.p01	A6V30_10185.p01
A6V30_10335		CopG family transcriptional regulator	3	3	1	1	2124	1	819		224	224	224		BMY_2131.p01																					B9T18_10080.p01			A6V30_10335.p01
A6V30_10260		CopG family transcriptional regulator	1	1	1	1	2133	1	485		224	224	224																										A6V30_10260.p01
A6V30_10290		CopG family transcriptional regulator	1	1	1	1	2102	1	810		224	224	224																										A6V30_10290.p01
BMY_2185		CopG family transcriptional regulator	1	1	1	1	2114	1	771		224	224	224		BMY_2185.p01
B9T13_10340		CopG family transcriptional regulator	1	1	1	1	2122	1	497		224	224	224																								B9T13_10340.p01
J7561_08030		copper-translocating P-type ATPase	18	18	1	1	766	86	2		932	2177	2107		BMY_1186.p01			102e21fe2bbcace64a7555dd0bcc9007_1840	4a9cac2c1a817d9acdec143b653b9a80_6387	ac8fed72b32d7540cf9a1b9ac12df95a_2263		79ccbe49faa72747a800162f6a36c0ca_2658	614e29224da4f337b8899b3142d81070_3356	d977e7edc1a56720a787e465ab4ce472_4479	e653c257947c2dd0a414de7cb159ba14_4462			83683a6c7ca473684645e0830a47223d_3836		c648bd7c3a222aa51bed3e3836bcf8c8_6270		B9T15_07545.p01	B9T14_07515.p01	B9T11_10020.p01	B9T12_04955.p01	B9T18_07615.p01	B9T13_06210.p01	F387_01785.p01	A6V30_00070.p01
J7600_02245		CPBP family intramembrane metalloprotease	16	16	1	1	3410	1	347		521	758	712	B9T10_03495.p01	BMY_0016.p01	a04b031c37c06570dd644ef46d09ac8c_4499	2cf5bec40a3ef4476bf46f509f729c16_7685			ac8fed72b32d7540cf9a1b9ac12df95a_4104			614e29224da4f337b8899b3142d81070_1783	d977e7edc1a56720a787e465ab4ce472_1796	e653c257947c2dd0a414de7cb159ba14_1783		752b3971131f3206662b5e22da3b23aa_7316	83683a6c7ca473684645e0830a47223d_885	03da1bd30b32560bef8e38ea7761d9fe_7748		B9T21_02750.p01	B9T15_03660.p01	B9T14_01380.p01	B9T11_08780.p01			B9T13_03590.p01
B9T13_01060		CRISPR-associated endonuclease Cas3''	3	3	1	1	656	1	136		2957	2963	2959																					B9T11_01685.p01			B9T13_01060.p01	F387_01045.p01
J7558_09710		c-type cytochrome	15	15	1	1	2705	11	3		605	926	904		BMY_0840.p01	a04b031c37c06570dd644ef46d09ac8c_7704	2cf5bec40a3ef4476bf46f509f729c16_7579	102e21fe2bbcace64a7555dd0bcc9007_7667	4a9cac2c1a817d9acdec143b653b9a80_7660	ac8fed72b32d7540cf9a1b9ac12df95a_7587			614e29224da4f337b8899b3142d81070_7843	d977e7edc1a56720a787e465ab4ce472_7964	e653c257947c2dd0a414de7cb159ba14_7956	31e4ba73e5ddb8c85dea419204f0df5a_7617		83683a6c7ca473684645e0830a47223d_6763	03da1bd30b32560bef8e38ea7761d9fe_7793	c648bd7c3a222aa51bed3e3836bcf8c8_86	B9T21_07855.p01							F387_01557.p01
BMY_1968		cystathionine beta-lyase	1	1	1	1	1253	245	1		605	605	605		BMY_1968.p01
J7620_03530		cysteine desulfurase	18	18	1	1	742	1	244		1052	1136	1131	B9T10_07830.p01	BMY_1162.p01		2cf5bec40a3ef4476bf46f509f729c16_1449	102e21fe2bbcace64a7555dd0bcc9007_1941	4a9cac2c1a817d9acdec143b653b9a80_6286		197b0243bc5bc4c380ecfb8919a026b1_2210		614e29224da4f337b8899b3142d81070_3257	d977e7edc1a56720a787e465ab4ce472_4380	e653c257947c2dd0a414de7cb159ba14_4363	31e4ba73e5ddb8c85dea419204f0df5a_3256	752b3971131f3206662b5e22da3b23aa_2805	83683a6c7ca473684645e0830a47223d_3935				B9T15_07665.p01	B9T14_07635.p01		B9T12_05070.p01		B9T13_06330.p01	F387_01809.p01	A6V30_00195.p01
B143_RS0104625		cytochrome b/b6 domain-containing protein	1	1	1	1	125	3	7		722	722	722																	c648bd7c3a222aa51bed3e3836bcf8c8_3602
A6V30_05835		cytochrome C	12	12	1	1	2703	11	5		356	926	878	B9T10_05005.p01	BMY_0841.p01						197b0243bc5bc4c380ecfb8919a026b1_7654	79ccbe49faa72747a800162f6a36c0ca_7410					752b3971131f3206662b5e22da3b23aa_7541					B9T15_00110.p01	B9T14_04915.p01	B9T11_06255.p01	B9T12_03420.p01	B9T18_00105.p01	B9T13_08925.p01		A6V30_05835.p01
B143_RS0100875		cytochrome c	1	1	1	1	2887	210	1		1244	1244	1244																	c648bd7c3a222aa51bed3e3836bcf8c8_689
J7553_01390		cytochrome ubiquinol oxidase subunit I	24	24	1	1	1887	1	1176		1322	1322	1322	B9T10_02650.p01	BMY_0394.p01	a04b031c37c06570dd644ef46d09ac8c_211	2cf5bec40a3ef4476bf46f509f729c16_189		4a9cac2c1a817d9acdec143b653b9a80_689	ac8fed72b32d7540cf9a1b9ac12df95a_1109	197b0243bc5bc4c380ecfb8919a026b1_1116	79ccbe49faa72747a800162f6a36c0ca_611	614e29224da4f337b8899b3142d81070_1111	d977e7edc1a56720a787e465ab4ce472_1124	e653c257947c2dd0a414de7cb159ba14_1111	31e4ba73e5ddb8c85dea419204f0df5a_1268	752b3971131f3206662b5e22da3b23aa_615	83683a6c7ca473684645e0830a47223d_1557	03da1bd30b32560bef8e38ea7761d9fe_753	c648bd7c3a222aa51bed3e3836bcf8c8_1663	B9T21_02455.p01	B9T15_02065.p01	B9T14_02965.p01		B9T12_02465.p01	B9T18_02620.p01	B9T13_02525.p01	F387_00291.p01	A6V30_04090.p01
B9T11_10110		dCTP deaminase	1	1	1	1	2218	1	873		524	524	524																					B9T11_10110.p01
BMY_2192		DDE domain-containing protein	1	1	1	1	2112	1	822		248	248	248		BMY_2192.p01
B143_RS0106465		DDE-type integrase/transposase/recombinase	17	17	1	1	3449	1	370		2099	2102	2101	B9T10_07215.p01		a04b031c37c06570dd644ef46d09ac8c_2304	2cf5bec40a3ef4476bf46f509f729c16_3168	102e21fe2bbcace64a7555dd0bcc9007_7778	4a9cac2c1a817d9acdec143b653b9a80_7790		197b0243bc5bc4c380ecfb8919a026b1_3292	79ccbe49faa72747a800162f6a36c0ca_4440				31e4ba73e5ddb8c85dea419204f0df5a_4346				c648bd7c3a222aa51bed3e3836bcf8c8_5078	B9T21_04970.p01	B9T15_07105.p01	B9T14_07075.p01	B9T11_02780.p01		B9T18_05475.p01	B9T13_05780.p01	F387_00618.p01	A6V30_09945.p01
A6V30_10030		DDE-type integrase/transposase/recombinase	4	4	1	1	2052	1	847		127	686	315						4a9cac2c1a817d9acdec143b653b9a80_7850							31e4ba73e5ddb8c85dea419204f0df5a_7878											B9T13_10365.p01		A6V30_10030.p01
J7606_08330		DDE-type integrase/transposase/recombinase	4	4	1	1	3195	37	10		1922	1922	1922										614e29224da4f337b8899b3142d81070_6572	d977e7edc1a56720a787e465ab4ce472_6627	e653c257947c2dd0a414de7cb159ba14_6614			83683a6c7ca473684645e0830a47223d_7094
B9T10_04160		DDE-type integrase/transposase/recombinase	2	2	1	1	3245	1	858		314	686	500	B9T10_04160.p01					4a9cac2c1a817d9acdec143b653b9a80_7854
J7552_05505		DDE-type integrase/transposase/recombinase	1	1	1	1	120	31	4		1904	1904	1904								197b0243bc5bc4c380ecfb8919a026b1_4381
J7554_09590		DDE-type integrase/transposase/recombinase	1	1	1	1	2212	1	746		194	194	194									79ccbe49faa72747a800162f6a36c0ca_7598
J7553_10135		DDE-type integrase/transposase/recombinase	1	1	1	28	1	104	1	Investigate	302	302	302							ac8fed72b32d7540cf9a1b9ac12df95a_8011
A6V30_03790		DEAD/DEAH box helicase	20	20	1	1	1752	1	1341		1391	2942	2864	B9T10_02175.p01	BMY_0327.p01	a04b031c37c06570dd644ef46d09ac8c_446	2cf5bec40a3ef4476bf46f509f729c16_424		4a9cac2c1a817d9acdec143b653b9a80_924	ac8fed72b32d7540cf9a1b9ac12df95a_874	197b0243bc5bc4c380ecfb8919a026b1_881	79ccbe49faa72747a800162f6a36c0ca_846				31e4ba73e5ddb8c85dea419204f0df5a_1503	752b3971131f3206662b5e22da3b23aa_850		03da1bd30b32560bef8e38ea7761d9fe_988	c648bd7c3a222aa51bed3e3836bcf8c8_2052	B9T21_02165.p01	B9T15_02540.p01	B9T14_02495.p01	B9T11_00560.p01		B9T18_02915.p01	B9T13_02235.p01	F387_00228.p01	A6V30_03790.p01
J7602_02235		DEAD/DEAH box helicase	14	14	1	1	2507	1	979		3086	3086	3086	B9T10_03470.p01		a04b031c37c06570dd644ef46d09ac8c_4479						79ccbe49faa72747a800162f6a36c0ca_7724	614e29224da4f337b8899b3142d81070_1763	d977e7edc1a56720a787e465ab4ce472_1776	e653c257947c2dd0a414de7cb159ba14_1763			83683a6c7ca473684645e0830a47223d_905	03da1bd30b32560bef8e38ea7761d9fe_95			B9T15_01270.p01	B9T14_03760.p01	B9T11_08545.p01		B9T18_01795.p01	B9T13_03565.p01		A6V30_04945.p01
B9T15_10005		DEAD/DEAH box helicase	5	5	1	1	2064	1	853		3245	3245	3245								197b0243bc5bc4c380ecfb8919a026b1_7794										B9T21_09765.p01	B9T15_10005.p01	B9T14_09975.p01			B9T18_09990.p01
J7558_09145		DEAD/DEAH box helicase	1	1	1	1	419	1	390		2081	2081	2081			a04b031c37c06570dd644ef46d09ac8c_7259
J7552_09435		DEAD/DEAH box helicase	1	1	1	1	2447	1	1667		2471	2471	2471								197b0243bc5bc4c380ecfb8919a026b1_7487
B9T13_10100		DEAD/DEAH box helicase	1	1	1	1	493	1	112		3098	3098	3098																								B9T13_10100.p01
B9T13_06370		DEAD/DEAH box helicase family protein	11	11	1	1	845	1	258		2222	2222	2222				2cf5bec40a3ef4476bf46f509f729c16_1481	102e21fe2bbcace64a7555dd0bcc9007_1973	4a9cac2c1a817d9acdec143b653b9a80_6254				614e29224da4f337b8899b3142d81070_3225	d977e7edc1a56720a787e465ab4ce472_4348	e653c257947c2dd0a414de7cb159ba14_4331		752b3971131f3206662b5e22da3b23aa_2837	83683a6c7ca473684645e0830a47223d_3967				B9T15_07705.p01	B9T14_07675.p01				B9T13_06370.p01
J7547_08035		DEAD/DEAH box helicase family protein	2	2	1	1	1144	33	8		2150	2150	2150					102e21fe2bbcace64a7555dd0bcc9007_6387	4a9cac2c1a817d9acdec143b653b9a80_3547
J7560_06750		DEAD/DEAH box helicase family protein	1	1	1	1	2613	6	8		2375	2375	2375				2cf5bec40a3ef4476bf46f509f729c16_5347
J7553_09990		DEAD/DEAH box helicase family protein	1	1	1	1	2321	1	1809		1901	1901	1901							ac8fed72b32d7540cf9a1b9ac12df95a_7905
BMY_0017		death-on-curing protein	1	1	1	1	3409	1	201		149	149	149		BMY_0017.p01
BMY_0059		death-on-curing protein	1	1	1	1	1460	1	1613		149	149	149		BMY_0059.p01
BMY_0062		death-on-curing protein	1	1	1	1	1457	1	1610		149	149	149		BMY_0062.p01
B9T13_10105		death-on-curing protein	1	1	1	1	492	1	111		434	434	434																								B9T13_10105.p01
J7606_07045		DedA family protein	19	19	1	1	1304	299	1		410	410	410	B9T10_00650.p01	BMY_2015.p01		2cf5bec40a3ef4476bf46f509f729c16_3502	102e21fe2bbcace64a7555dd0bcc9007_4153	4a9cac2c1a817d9acdec143b653b9a80_2150	ac8fed72b32d7540cf9a1b9ac12df95a_5177	197b0243bc5bc4c380ecfb8919a026b1_3653	79ccbe49faa72747a800162f6a36c0ca_5591	614e29224da4f337b8899b3142d81070_5483	d977e7edc1a56720a787e465ab4ce472_5605	e653c257947c2dd0a414de7cb159ba14_5588	31e4ba73e5ddb8c85dea419204f0df5a_4732	752b3971131f3206662b5e22da3b23aa_5616	83683a6c7ca473684645e0830a47223d_5942			B9T21_00645.p01				B9T12_00660.p01	B9T18_04455.p01		F387_00965.p01	A6V30_02280.p01
J7606_06000		DegT/DnrJ/EryC1/StrS family aminotransferase	5	5	1	1	22	1	543		1154	1154	1154									79ccbe49faa72747a800162f6a36c0ca_5010	614e29224da4f337b8899b3142d81070_4659	d977e7edc1a56720a787e465ab4ce472_5042	e653c257947c2dd0a414de7cb159ba14_4759			83683a6c7ca473684645e0830a47223d_5353
J7600_05830		DegT/DnrJ/EryC1/StrS family aminotransferase	5	5	1	1	7	1	593		1088	1088	1088									79ccbe49faa72747a800162f6a36c0ca_5042	614e29224da4f337b8899b3142d81070_4627	d977e7edc1a56720a787e465ab4ce472_5074	e653c257947c2dd0a414de7cb159ba14_4727			83683a6c7ca473684645e0830a47223d_5385
BMY_1499		DegT/DnrJ/EryC1/StrS family aminotransferase	5	5	1	1	316	1	689		1115	1124	1118		BMY_1499.p01	a04b031c37c06570dd644ef46d09ac8c_3486					197b0243bc5bc4c380ecfb8919a026b1_4691					31e4ba73e5ddb8c85dea419204f0df5a_6107										B9T18_06930.p01
B9T11_10115		deoxycytidine deaminase	1	1	1	1	2219	1	874		500	500	500																					B9T11_10115.p01
BMY_1436		dethiobiotin synthase	1	1	1	1	238	138	1		314	314	314		BMY_1436.p01
J7607_04060		DGQHR domain-containing protein	1	1	1	1	730	1	224		1028	1028	1028													31e4ba73e5ddb8c85dea419204f0df5a_3216
B143_RS0101005		dicarboxylate/amino acid:cation symporter	2	2	1	1	2595	1	699		1223	1223	1223																	c648bd7c3a222aa51bed3e3836bcf8c8_783	B9T21_06900.p01
B9T14_03145		DMT family transporter	24	24	1	1	1928	1	1136		581	902	888	B9T10_02830.p01	BMY_0440.p01	a04b031c37c06570dd644ef46d09ac8c_71	2cf5bec40a3ef4476bf46f509f729c16_49		4a9cac2c1a817d9acdec143b653b9a80_549	ac8fed72b32d7540cf9a1b9ac12df95a_1249	197b0243bc5bc4c380ecfb8919a026b1_1256	79ccbe49faa72747a800162f6a36c0ca_471	614e29224da4f337b8899b3142d81070_1251	d977e7edc1a56720a787e465ab4ce472_1264	e653c257947c2dd0a414de7cb159ba14_1251	31e4ba73e5ddb8c85dea419204f0df5a_1128	752b3971131f3206662b5e22da3b23aa_475	83683a6c7ca473684645e0830a47223d_1417	03da1bd30b32560bef8e38ea7761d9fe_613		B9T21_02635.p01	B9T15_01885.p01	B9T14_03145.p01	B9T11_00085.p01	B9T12_02645.p01	B9T18_02440.p01	B9T13_02705.p01	F387_00327.p01	A6V30_04270.p01
B143_RS0101945		DMT family transporter	1	1	1	1	1929	1	1137		914	914	914																	c648bd7c3a222aa51bed3e3836bcf8c8_1523
B9T11_08820		DNA (cytosine-5-)-methyltransferase	1	1	1	1	3399	1	333		1220	1220	1220																					B9T11_08820.p01
J7558_06695		DNA adenine methylase	1	1	1	1	1415	1	1628		824	824	824			a04b031c37c06570dd644ef46d09ac8c_5328
J7624_10165		DNA adenine methylase	1	1	1	36	1	117	1	Investigate	466	466	466																03da1bd30b32560bef8e38ea7761d9fe_8052
J7624_10170		DNA adenine methylase	1	1	1	33	1	107	1	Investigate	466	466	466																03da1bd30b32560bef8e38ea7761d9fe_8056
J7558_10110		DNA adenine methylase	1	1	1	1	2324	1	1813		559	559	559			a04b031c37c06570dd644ef46d09ac8c_8016
A6V30_10215		DNA adenine methylase	1	1	1	1	2070	1	472		863	863	863																										A6V30_10215.p01
A6V30_10320		DNA adenine methylase	1	1	1	1	2108	1	816		863	863	863																										A6V30_10320.p01
J7558_06635		DNA cytosine methyltransferase	6	6	1	1	2195	1	1845		1271	1271	1271			a04b031c37c06570dd644ef46d09ac8c_5280							614e29224da4f337b8899b3142d81070_1979	d977e7edc1a56720a787e465ab4ce472_1992	e653c257947c2dd0a414de7cb159ba14_1979			83683a6c7ca473684645e0830a47223d_689			B9T21_09830.p01
J7624_02530		DNA cytosine methyltransferase	1	1	1	1	795	1	300		1568	1568	1568																03da1bd30b32560bef8e38ea7761d9fe_2017
BMY_0379		DNA internalization-related competence protein ComEC/Rec2	1	1	1	1	1870	1	1192		710	710	710		BMY_0379.p01
BMY_0862		DNA ligase	2	2	1	1	698	57	2		461	848	654		BMY_0862.p01																			B9T11_06350.p01
J7552_09825		DNA methyltransferase	5	5	1	1	2980	1	522		1547	1547	1547								197b0243bc5bc4c380ecfb8919a026b1_7783										B9T21_09780.p01	B9T15_10020.p01	B9T14_09990.p01			B9T18_10005.p01
BMY_0024		DNA methyltransferase	1	1	1	1	3393	1	48		2069	2069	2069		BMY_0024.p01
BMY_0524		DNA mismatch repair protein MutS	1	1	1	1	3297	1	1039		524	524	524		BMY_0524.p01
A6V30_07785		DNA recombination/repair protein RecA	1	1	1	1	186	3	41		1052	1052	1052																										A6V30_07785.p01
BMY_2133		DNA replication protein	1	1	1	1	2917	1	399		1211	1211	1211		BMY_2133.p01
BMY_2189		DNA replication protein	1	1	1	1	2118	1	824		698	698	698		BMY_2189.p01
BMY_2188		DNA replication protein	1	1	1	1	2117	1	768		350	350	350		BMY_2188.p01
J7547_02765		DNA-3-methyladenine glycosylase I	24	24	1	1	886	88	2		572	572	572	B9T10_08130.p01	BMY_1111.p01	a04b031c37c06570dd644ef46d09ac8c_1980	2cf5bec40a3ef4476bf46f509f729c16_1664	102e21fe2bbcace64a7555dd0bcc9007_2200	4a9cac2c1a817d9acdec143b653b9a80_2571	ac8fed72b32d7540cf9a1b9ac12df95a_2503	197b0243bc5bc4c380ecfb8919a026b1_2023	79ccbe49faa72747a800162f6a36c0ca_2898	614e29224da4f337b8899b3142d81070_3022	d977e7edc1a56720a787e465ab4ce472_4145	e653c257947c2dd0a414de7cb159ba14_4128	31e4ba73e5ddb8c85dea419204f0df5a_3033	752b3971131f3206662b5e22da3b23aa_3008	83683a6c7ca473684645e0830a47223d_4170	03da1bd30b32560bef8e38ea7761d9fe_2200		B9T21_05385.p01	B9T15_07915.p01	B9T14_07885.p01	B9T11_07520.p01	B9T12_05295.p01	B9T18_07965.p01	B9T13_06580.p01	F387_00582.p01
J7622_01085		DNA-binding protein	13	13	1	1	512	1	220		1013	1013	1013	B9T10_03525.p01			2cf5bec40a3ef4476bf46f509f729c16_7623	102e21fe2bbcace64a7555dd0bcc9007_2013	4a9cac2c1a817d9acdec143b653b9a80_6214				614e29224da4f337b8899b3142d81070_1807	d977e7edc1a56720a787e465ab4ce472_1820	e653c257947c2dd0a414de7cb159ba14_1807			83683a6c7ca473684645e0830a47223d_861	03da1bd30b32560bef8e38ea7761d9fe_7698			B9T15_03680.p01	B9T14_01360.p01	B9T11_07740.p01			B9T13_09820.p01
B9T13_10110		DNA-binding protein	1	1	1	1	491	1	110		1010	1010	1010																								B9T13_10110.p01
F387_01955		DNA-invertase from lambdoid prophage e14	1	1	1	1	2083	1	484		602	602	602																									F387_01955.p01
J7553_04655		DoxX family protein	14	14	1	1	3593	136	1		413	413	413				2cf5bec40a3ef4476bf46f509f729c16_2634			ac8fed72b32d7540cf9a1b9ac12df95a_3696		79ccbe49faa72747a800162f6a36c0ca_3907	614e29224da4f337b8899b3142d81070_4091	d977e7edc1a56720a787e465ab4ce472_2686	e653c257947c2dd0a414de7cb159ba14_3147	31e4ba73e5ddb8c85dea419204f0df5a_3810		83683a6c7ca473684645e0830a47223d_2996		c648bd7c3a222aa51bed3e3836bcf8c8_4532		B9T15_06430.p01	B9T14_06400.p01	B9T11_03455.p01		B9T18_06135.p01	B9T13_05105.p01
B9T21_04295		DoxX family protein	12	12	1	1	384	69	1		413	413	413	B9T10_06555.p01	BMY_1664.p01	a04b031c37c06570dd644ef46d09ac8c_2854		102e21fe2bbcace64a7555dd0bcc9007_3260	4a9cac2c1a817d9acdec143b653b9a80_3884		197b0243bc5bc4c380ecfb8919a026b1_2760						752b3971131f3206662b5e22da3b23aa_3984		03da1bd30b32560bef8e38ea7761d9fe_3407		B9T21_04295.p01				B9T12_07180.p01			F387_00755.p01	A6V30_09265.p01
J7560_06160		DsrE family protein	24	24	1	1	3275	1	1016		278	335	332	B9T10_03355.p01	BMY_0547.p01	a04b031c37c06570dd644ef46d09ac8c_4379	2cf5bec40a3ef4476bf46f509f729c16_4884		4a9cac2c1a817d9acdec143b653b9a80_127	ac8fed72b32d7540cf9a1b9ac12df95a_4700	197b0243bc5bc4c380ecfb8919a026b1_5796	79ccbe49faa72747a800162f6a36c0ca_83	614e29224da4f337b8899b3142d81070_1675	d977e7edc1a56720a787e465ab4ce472_1688	e653c257947c2dd0a414de7cb159ba14_1675	31e4ba73e5ddb8c85dea419204f0df5a_710	752b3971131f3206662b5e22da3b23aa_71	83683a6c7ca473684645e0830a47223d_993	03da1bd30b32560bef8e38ea7761d9fe_195		B9T21_08865.p01	B9T15_01385.p01	B9T14_03645.p01	B9T11_08430.p01	B9T12_03170.p01	B9T18_01920.p01	B9T13_03450.p01	F387_01135.p01	A6V30_04780.p01
B143_RS0101400		DsrE family protein	1	1	1	1	1949	1	939		335	335	335																	c648bd7c3a222aa51bed3e3836bcf8c8_1097
rffA		dTDP-4-amino-4,6-dideoxygalactose transaminase	1	1	1	1	106	1	625		1136	1136	1136																	c648bd7c3a222aa51bed3e3836bcf8c8_3980
rfbB		dTDP-glucose 4,6-dehydratase	6	6	1	1	309	1	620		1058	1058	1058		BMY_1496.p01	a04b031c37c06570dd644ef46d09ac8c_3502					197b0243bc5bc4c380ecfb8919a026b1_4671					31e4ba73e5ddb8c85dea419204f0df5a_6087				c648bd7c3a222aa51bed3e3836bcf8c8_3968						B9T18_06950.p01
A6V30_08515		dTDP-glucose 4,6-dehydratase	1	1	1	1	101	1	601		1058	1058	1058																										A6V30_08515.p01
J7552_06480		DUF115 domain-containing protein	1	1	1	1	2656	4	36		653	653	653								197b0243bc5bc4c380ecfb8919a026b1_5154
J7624_01320		DUF1440 domain-containing protein	6	6	1	1	607	1	171		527	527	527		BMY_0308.p01	a04b031c37c06570dd644ef46d09ac8c_506	2cf5bec40a3ef4476bf46f509f729c16_484				197b0243bc5bc4c380ecfb8919a026b1_821								03da1bd30b32560bef8e38ea7761d9fe_1048									F387_00211.p01
J7600_08670		DUF1778 domain-containing protein	4	4	1	1	2263	1	701		269	269	269										614e29224da4f337b8899b3142d81070_6885	d977e7edc1a56720a787e465ab4ce472_7066	e653c257947c2dd0a414de7cb159ba14_7056			83683a6c7ca473684645e0830a47223d_189
J7547_07495		DUF1778 domain-containing protein	3	3	1	1	2250	1	706		269	269	269					102e21fe2bbcace64a7555dd0bcc9007_5959	4a9cac2c1a817d9acdec143b653b9a80_6013																			F387_01710.p01
J7620_02975		DUF1778 domain-containing protein	1	1	1	1	2254	1	717		269	269	269														752b3971131f3206662b5e22da3b23aa_2364
B143_RS0100990		DUF1778 domain-containing protein	1	1	1	1	2596	1	696		269	269	269																	c648bd7c3a222aa51bed3e3836bcf8c8_771
J7553_05430		DUF1828 domain-containing protein	2	2	1	1	1407	1	1		758	758	758							ac8fed72b32d7540cf9a1b9ac12df95a_4311							752b3971131f3206662b5e22da3b23aa_7606
J7607_00765		DUF1833 family protein	1	1	1	1	2488	1	1771		527	527	527													31e4ba73e5ddb8c85dea419204f0df5a_604
B9T10_03570		DUF1983 domain-containing protein	6	6	1	1	2402	1	23		3416	3815	3482	B9T10_03570.p01									614e29224da4f337b8899b3142d81070_1843	d977e7edc1a56720a787e465ab4ce472_1856	e653c257947c2dd0a414de7cb159ba14_1843			83683a6c7ca473684645e0830a47223d_825							B9T12_04845.p01
J7624_09515		DUF1983 domain-containing protein	1	1	1	1	2437	1	74		3305	3305	3305																03da1bd30b32560bef8e38ea7761d9fe_7547
B9T10_00385		DUF2157 domain-containing protein	23	23	1	1	1235	8	5		854	854	854	B9T10_00385.p01	BMY_1956.p01	a04b031c37c06570dd644ef46d09ac8c_5175	2cf5bec40a3ef4476bf46f509f729c16_3289	102e21fe2bbcace64a7555dd0bcc9007_4374	4a9cac2c1a817d9acdec143b653b9a80_2371		197b0243bc5bc4c380ecfb8919a026b1_3858	79ccbe49faa72747a800162f6a36c0ca_5818	614e29224da4f337b8899b3142d81070_5263	d977e7edc1a56720a787e465ab4ce472_5384	e653c257947c2dd0a414de7cb159ba14_5367	31e4ba73e5ddb8c85dea419204f0df5a_5032	752b3971131f3206662b5e22da3b23aa_5411	83683a6c7ca473684645e0830a47223d_6163	03da1bd30b32560bef8e38ea7761d9fe_4450			B9T15_04655.p01	B9T14_00385.p01	B9T11_02360.p01	B9T12_00375.p01	B9T18_04740.p01	B9T13_00385.p01	F387_00912.p01	A6V30_02025.p01
J7553_06770		DUF2157 domain-containing protein	1	1	1	1	1231	8	3		854	854	854							ac8fed72b32d7540cf9a1b9ac12df95a_5381
B143_RS0109210		DUF2157 domain-containing protein	1	1	1	1	1236	8	6		854	854	854																	c648bd7c3a222aa51bed3e3836bcf8c8_7228
J7558_05660		DUF2326 domain-containing protein	1	1	1	1	537	1	345		1709	1709	1709			a04b031c37c06570dd644ef46d09ac8c_4503
J7558_06840		DUF2511 domain-containing protein	1	1	1	1	1796	1	1292		329	329	329			a04b031c37c06570dd644ef46d09ac8c_5443
B9T13_01975		DUF2523 domain-containing protein	2	2	1	1	615	1	1392		281	281	281																	c648bd7c3a222aa51bed3e3836bcf8c8_2257							B9T13_01975.p01
BMY_1158		DUF262 domain-containing protein	14	14	1	1	726	1	254		350	2312	2171		BMY_1158.p01		2cf5bec40a3ef4476bf46f509f729c16_1465	102e21fe2bbcace64a7555dd0bcc9007_1957	4a9cac2c1a817d9acdec143b653b9a80_6270		197b0243bc5bc4c380ecfb8919a026b1_2194		614e29224da4f337b8899b3142d81070_3241	d977e7edc1a56720a787e465ab4ce472_4364	e653c257947c2dd0a414de7cb159ba14_4347		752b3971131f3206662b5e22da3b23aa_2821	83683a6c7ca473684645e0830a47223d_3951				B9T15_07685.p01	B9T14_07655.p01				B9T13_06350.p01	F387_01813.p01
J7606_00385		DUF262 domain-containing protein	7	7	1	1	1598	1	1501		1778	1778	1778						4a9cac2c1a817d9acdec143b653b9a80_1493			79ccbe49faa72747a800162f6a36c0ca_1415	614e29224da4f337b8899b3142d81070_305	d977e7edc1a56720a787e465ab4ce472_318	e653c257947c2dd0a414de7cb159ba14_305			83683a6c7ca473684645e0830a47223d_2363							B9T12_01475.p01
J7554_09465		DUF262 domain-containing protein	5	5	1	1	1965	1	804		1802	1802	1802		BMY_0571.p01		2cf5bec40a3ef4476bf46f509f729c16_7827		4a9cac2c1a817d9acdec143b653b9a80_27		197b0243bc5bc4c380ecfb8919a026b1_5895	79ccbe49faa72747a800162f6a36c0ca_7505
J7561_07835		DUF262 domain-containing protein	3	3	1	1	810	1	227		1916	1916	1916					102e21fe2bbcace64a7555dd0bcc9007_1997	4a9cac2c1a817d9acdec143b653b9a80_6230																	B9T18_07740.p01
J7552_07400		DUF262 domain-containing protein	2	2	1	1	1962	1	800		2000	2003	2001						4a9cac2c1a817d9acdec143b653b9a80_39		197b0243bc5bc4c380ecfb8919a026b1_5883
BMY_0569		DUF262 domain-containing protein	2	2	1	1	1958	1	802		1451	3434	2442		BMY_0569.p01				4a9cac2c1a817d9acdec143b653b9a80_35
J7552_07405		DUF262 domain-containing protein	1	1	1	1	1963	1	799		1466	1466	1466								197b0243bc5bc4c380ecfb8919a026b1_5887
J7554_08600		DUF262 domain-containing protein	1	1	1	1	2431	1	1748		1178	1178	1178									79ccbe49faa72747a800162f6a36c0ca_6833
B9T21_09980		DUF2644 domain-containing protein	7	7	1	1	2367	1	1831		221	221	221									79ccbe49faa72747a800162f6a36c0ca_6943	614e29224da4f337b8899b3142d81070_1943	d977e7edc1a56720a787e465ab4ce472_1956	e653c257947c2dd0a414de7cb159ba14_1943			83683a6c7ca473684645e0830a47223d_725			B9T21_09980.p01			B9T11_04975.p01
J7620_09400		DUF2644 domain-containing protein	5	5	1	1	2363	1	1802		218	227	221			a04b031c37c06570dd644ef46d09ac8c_4631											752b3971131f3206662b5e22da3b23aa_7460		03da1bd30b32560bef8e38ea7761d9fe_8064						B9T12_04705.p01		B9T13_09925.p01
J7553_05345		DUF2644 domain-containing protein	1	1	1	1	2159	1	1833		221	221	221							ac8fed72b32d7540cf9a1b9ac12df95a_4244
J7560_04985		DUF2644 domain-containing protein	1	1	1	1	2171	1	1818		227	227	227				2cf5bec40a3ef4476bf46f509f729c16_3961
J7624_10045		DUF2644 domain-containing protein	1	1	1	1	2164	1	1822		218	218	218																03da1bd30b32560bef8e38ea7761d9fe_7962
B9T15_05285		DUF3149 domain-containing protein	17	17	1	1	227	144	1		128	128	128	B9T10_05365.p01	BMY_1425.p01		2cf5bec40a3ef4476bf46f509f729c16_4192	102e21fe2bbcace64a7555dd0bcc9007_4661	4a9cac2c1a817d9acdec143b653b9a80_5046	ac8fed72b32d7540cf9a1b9ac12df95a_5793	197b0243bc5bc4c380ecfb8919a026b1_4349					31e4ba73e5ddb8c85dea419204f0df5a_5811	752b3971131f3206662b5e22da3b23aa_4740				B9T21_03130.p01	B9T15_05285.p01	B9T14_05270.p01	B9T11_04595.p01	B9T12_08085.p01	B9T18_07300.p01	B9T13_03860.p01	F387_01378.p01
F387_00197		DUF3553 domain-containing protein	23	23	1	1	1720	1	1373		806	812	806	B9T10_02030.p01	BMY_0293.p01	a04b031c37c06570dd644ef46d09ac8c_563	2cf5bec40a3ef4476bf46f509f729c16_541		4a9cac2c1a817d9acdec143b653b9a80_1041	ac8fed72b32d7540cf9a1b9ac12df95a_757	197b0243bc5bc4c380ecfb8919a026b1_766	79ccbe49faa72747a800162f6a36c0ca_963	614e29224da4f337b8899b3142d81070_757	d977e7edc1a56720a787e465ab4ce472_770	e653c257947c2dd0a414de7cb159ba14_757		752b3971131f3206662b5e22da3b23aa_971	83683a6c7ca473684645e0830a47223d_1911	03da1bd30b32560bef8e38ea7761d9fe_1105		B9T21_02020.p01	B9T15_02690.p01	B9T14_02350.p01	B9T11_00710.p01	B9T12_02040.p01	B9T18_03065.p01	B9T13_02090.p01	F387_00197.p01	A6V30_03640.p01
J7620_00015		DUF3553 domain-containing protein	21	21	1	1	2008	1	995		848	848	848	B9T10_03445.p01		a04b031c37c06570dd644ef46d09ac8c_4443	2cf5bec40a3ef4476bf46f509f729c16_4816			ac8fed72b32d7540cf9a1b9ac12df95a_4783		79ccbe49faa72747a800162f6a36c0ca_19	614e29224da4f337b8899b3142d81070_1739	d977e7edc1a56720a787e465ab4ce472_1752	e653c257947c2dd0a414de7cb159ba14_1739	31e4ba73e5ddb8c85dea419204f0df5a_646	752b3971131f3206662b5e22da3b23aa_11	83683a6c7ca473684645e0830a47223d_929	03da1bd30b32560bef8e38ea7761d9fe_131	c648bd7c3a222aa51bed3e3836bcf8c8_1029		B9T15_01305.p01	B9T14_03725.p01	B9T11_08510.p01	B9T12_03260.p01	B9T18_01820.p01	B9T13_03530.p01	F387_01153.p01	A6V30_04855.p01
B143_RS0102780		DUF3553 domain-containing protein	1	1	1	1	1718	1	1371		806	806	806																	c648bd7c3a222aa51bed3e3836bcf8c8_2169
J7560_04960		DUF3892 domain-containing protein	1	1	1	1	2176	1	1839		299	299	299				2cf5bec40a3ef4476bf46f509f729c16_3941
J7620_03535		DUF4007 family protein	16	16	1	1	740	1	245		908	932	929	B9T10_07835.p01	BMY_1161.p01		2cf5bec40a3ef4476bf46f509f729c16_1453	102e21fe2bbcace64a7555dd0bcc9007_1945	4a9cac2c1a817d9acdec143b653b9a80_6282		197b0243bc5bc4c380ecfb8919a026b1_2206		614e29224da4f337b8899b3142d81070_3253	d977e7edc1a56720a787e465ab4ce472_4376	e653c257947c2dd0a414de7cb159ba14_4359		752b3971131f3206662b5e22da3b23aa_2809	83683a6c7ca473684645e0830a47223d_3939				B9T15_07670.p01	B9T14_07640.p01				B9T13_06335.p01	F387_01810.p01	A6V30_00200.p01
B9T12_04745		DUF4055 domain-containing protein	15	15	1	1	2375	1	56		632	1355	1304	B9T10_03660.p01		a04b031c37c06570dd644ef46d09ac8c_4611				ac8fed72b32d7540cf9a1b9ac12df95a_4224			614e29224da4f337b8899b3142d81070_1923	d977e7edc1a56720a787e465ab4ce472_1936	e653c257947c2dd0a414de7cb159ba14_1923		752b3971131f3206662b5e22da3b23aa_7439	83683a6c7ca473684645e0830a47223d_745	03da1bd30b32560bef8e38ea7761d9fe_7990		B9T21_10115.p01	B9T15_03800.p01	B9T14_01240.p01	B9T11_04950.p01	B9T12_04745.p01		B9T13_09900.p01
B9T13_00625		DUF4198 domain-containing protein	12	12	1	1	680	7	25		794	800	794		BMY_2008.p01			102e21fe2bbcace64a7555dd0bcc9007_4181	4a9cac2c1a817d9acdec143b653b9a80_2178				614e29224da4f337b8899b3142d81070_5455	d977e7edc1a56720a787e465ab4ce472_5577	e653c257947c2dd0a414de7cb159ba14_5560	31e4ba73e5ddb8c85dea419204f0df5a_4760		83683a6c7ca473684645e0830a47223d_5970				B9T15_04415.p01	B9T14_00625.p01	B9T11_02120.p01			B9T13_00625.p01
J7552_03015		DUF4236 domain-containing protein	1	1	1	1	3699	76	1		782	782	782								197b0243bc5bc4c380ecfb8919a026b1_2393
J7552_07465		DUF4238 domain-containing protein	1	1	1	1	2534	48	1		794	794	794								197b0243bc5bc4c380ecfb8919a026b1_5935
J7560_07180		DUF4258 domain-containing protein	2	2	1	1	2536	48	3		281	281	281				2cf5bec40a3ef4476bf46f509f729c16_5686				197b0243bc5bc4c380ecfb8919a026b1_5943
J7554_08640		DUF4365 domain-containing protein	1	1	1	1	2424	1	70		524	524	524									79ccbe49faa72747a800162f6a36c0ca_6865
J7624_05590		DUF4401 domain-containing protein	24	24	1	1	1232	8	4		935	935	935	B9T10_00380.p01	BMY_1955.p01	a04b031c37c06570dd644ef46d09ac8c_5179	2cf5bec40a3ef4476bf46f509f729c16_3285	102e21fe2bbcace64a7555dd0bcc9007_4378	4a9cac2c1a817d9acdec143b653b9a80_2375	ac8fed72b32d7540cf9a1b9ac12df95a_5385	197b0243bc5bc4c380ecfb8919a026b1_3862	79ccbe49faa72747a800162f6a36c0ca_5822	614e29224da4f337b8899b3142d81070_5259	d977e7edc1a56720a787e465ab4ce472_5380	e653c257947c2dd0a414de7cb159ba14_5363	31e4ba73e5ddb8c85dea419204f0df5a_5036		83683a6c7ca473684645e0830a47223d_6167	03da1bd30b32560bef8e38ea7761d9fe_4454		B9T21_00385.p01	B9T15_04660.p01	B9T14_00380.p01	B9T11_02365.p01	B9T12_00370.p01	B9T18_04745.p01	B9T13_00380.p01	F387_00911.p01	A6V30_02020.p01
B143_RS0109205		DUF4401 domain-containing protein	2	2	1	1	1234	8	8		935	935	935														752b3971131f3206662b5e22da3b23aa_5407			c648bd7c3a222aa51bed3e3836bcf8c8_7224
B143_RS0100220		DUF4410 domain-containing protein	7	7	1	1	2727	148	1		416	491	480	B9T10_04895.p01	BMY_0815.p01					ac8fed72b32d7540cf9a1b9ac12df95a_2149										c648bd7c3a222aa51bed3e3836bcf8c8_173						B9T18_00215.p01		F387_01580.p01	A6V30_05720.p01
J7602_02265		DUF4435 domain-containing protein	4	4	1	1	549	1	199		872	872	872										614e29224da4f337b8899b3142d81070_1787	d977e7edc1a56720a787e465ab4ce472_1800	e653c257947c2dd0a414de7cb159ba14_1787			83683a6c7ca473684645e0830a47223d_881
J7624_00150		DUF4868 domain-containing protein	2	2	1	1	1968	1	1657		1022	1022	1022			a04b031c37c06570dd644ef46d09ac8c_4455													03da1bd30b32560bef8e38ea7761d9fe_119
J7560_05350		DUF5384 family protein	5	5	1	1	243	49	2		575	575	575				2cf5bec40a3ef4476bf46f509f729c16_4248	102e21fe2bbcace64a7555dd0bcc9007_4717	4a9cac2c1a817d9acdec143b653b9a80_4990											c648bd7c3a222aa51bed3e3836bcf8c8_3709								F387_01392.p01
B143_RS0105170		DUF6056 family protein	1	1	1	1	342	18	2		1628	1628	1628																	c648bd7c3a222aa51bed3e3836bcf8c8_4036
B143_RS0101895		DUF726 domain-containing protein	4	4	1	1	559	1	194		710	710	710		BMY_0452.p01												752b3971131f3206662b5e22da3b23aa_439			c648bd7c3a222aa51bed3e3836bcf8c8_1483								F387_00337.p01
J7607_06010		DUF861 domain-containing protein	1	1	1	1	676	7	18		359	359	359													31e4ba73e5ddb8c85dea419204f0df5a_4776
J7607_04090		DUF87 domain-containing protein	1	1	1	1	737	1	252		2033	2033	2033													31e4ba73e5ddb8c85dea419204f0df5a_3240
J7607_00630		DUF882 domain-containing protein	1	1	1	1	2183	1	1892		374	374	374													31e4ba73e5ddb8c85dea419204f0df5a_496
B9T15_03880		DUF968 domain-containing protein	15	15	1	1	1449	1	1853		287	296	295	B9T10_03725.p01		a04b031c37c06570dd644ef46d09ac8c_5292				ac8fed72b32d7540cf9a1b9ac12df95a_4275			614e29224da4f337b8899b3142d81070_1991	d977e7edc1a56720a787e465ab4ce472_2004	e653c257947c2dd0a414de7cb159ba14_1991		752b3971131f3206662b5e22da3b23aa_7642	83683a6c7ca473684645e0830a47223d_677	03da1bd30b32560bef8e38ea7761d9fe_3831		B9T21_10010.p01	B9T15_03880.p01	B9T14_01160.p01	B9T11_05015.p01	B9T12_04660.p01		B9T13_09980.p01
J7553_06735		EamA family transporter	1	1	1	1	688	15	4		935	935	935							ac8fed72b32d7540cf9a1b9ac12df95a_5353
J7561_07545		EexN family lipoprotein	10	10	1	1	2931	1	722		182	236	209	B9T10_04105.p01				102e21fe2bbcace64a7555dd0bcc9007_5951	4a9cac2c1a817d9acdec143b653b9a80_6005				614e29224da4f337b8899b3142d81070_6893	d977e7edc1a56720a787e465ab4ce472_7058	e653c257947c2dd0a414de7cb159ba14_7048		752b3971131f3206662b5e22da3b23aa_2356	83683a6c7ca473684645e0830a47223d_181		c648bd7c3a222aa51bed3e3836bcf8c8_759								F387_01712.p01
B9T12_06475		elongation factor P hydroxylase	24	24	1	1	1153	57	3		554	557	556	B9T10_09315.p01	BMY_0868.p01	a04b031c37c06570dd644ef46d09ac8c_6725	2cf5bec40a3ef4476bf46f509f729c16_7066			ac8fed72b32d7540cf9a1b9ac12df95a_6665	197b0243bc5bc4c380ecfb8919a026b1_6516	79ccbe49faa72747a800162f6a36c0ca_6786	614e29224da4f337b8899b3142d81070_7075	d977e7edc1a56720a787e465ab4ce472_7192	e653c257947c2dd0a414de7cb159ba14_7184	31e4ba73e5ddb8c85dea419204f0df5a_6554	752b3971131f3206662b5e22da3b23aa_6635	83683a6c7ca473684645e0830a47223d_7555	03da1bd30b32560bef8e38ea7761d9fe_6988	c648bd7c3a222aa51bed3e3836bcf8c8_5108	B9T21_06590.p01	B9T15_09080.p01	B9T14_09050.p01	B9T11_06355.p01	B9T12_06475.p01	B9T18_09140.p01	B9T13_07745.p01	F387_00345.p01	A6V30_01620.p01
J7561_04440		elongation factor P hydroxylase	2	2	1	1	1147	33	5		449	449	449					102e21fe2bbcace64a7555dd0bcc9007_6375	4a9cac2c1a817d9acdec143b653b9a80_3535
tuf		elongation factor Tu	23	23	1	1	858	20	1		1190	1190	1190	B9T10_08000.p01		a04b031c37c06570dd644ef46d09ac8c_2087	2cf5bec40a3ef4476bf46f509f729c16_1557	102e21fe2bbcace64a7555dd0bcc9007_2093		ac8fed72b32d7540cf9a1b9ac12df95a_2396	197b0243bc5bc4c380ecfb8919a026b1_2130	79ccbe49faa72747a800162f6a36c0ca_2791	614e29224da4f337b8899b3142d81070_3129	d977e7edc1a56720a787e465ab4ce472_4252	e653c257947c2dd0a414de7cb159ba14_4235	31e4ba73e5ddb8c85dea419204f0df5a_3140	752b3971131f3206662b5e22da3b23aa_2901	83683a6c7ca473684645e0830a47223d_4063	03da1bd30b32560bef8e38ea7761d9fe_2093	c648bd7c3a222aa51bed3e3836bcf8c8_6137	B9T21_05255.p01	B9T15_07785.p01	B9T14_07755.p01	B9T11_07650.p01	B9T12_05165.p01	B9T18_07835.p01	B9T13_06450.p01		A6V30_00335.p01
group_3612	tuf	elongation factor Tu	23	23	1	1	3685	231	1		1190	1190	1190	B9T10_06150.p01		a04b031c37c06570dd644ef46d09ac8c_3173	2cf5bec40a3ef4476bf46f509f729c16_2387	102e21fe2bbcace64a7555dd0bcc9007_2941		ac8fed72b32d7540cf9a1b9ac12df95a_4015	197b0243bc5bc4c380ecfb8919a026b1_2441	79ccbe49faa72747a800162f6a36c0ca_3665	614e29224da4f337b8899b3142d81070_4338	d977e7edc1a56720a787e465ab4ce472_2439	e653c257947c2dd0a414de7cb159ba14_3394	31e4ba73e5ddb8c85dea419204f0df5a_3487	752b3971131f3206662b5e22da3b23aa_3737	83683a6c7ca473684645e0830a47223d_2749	03da1bd30b32560bef8e38ea7761d9fe_3730	c648bd7c3a222aa51bed3e3836bcf8c8_4289	B9T21_03890.p01	B9T15_06025.p01	B9T14_05995.p01	B9T11_03860.p01	B9T12_06870.p01	B9T18_06540.p01	B9T13_04700.p01		A6V30_08860.p01
BMY_1139		elongation factor Tu	3	3	1	1	721	20	3		309	1148	789		BMY_1139.p01				4a9cac2c1a817d9acdec143b653b9a80_6136																			F387_01839.p01
group_278	BMY_1582	elongation factor Tu	3	3	1	1	380	135	1		582	1148	880		BMY_1582.p01				4a9cac2c1a817d9acdec143b653b9a80_4426																			F387_01536.p01
group_277	tuf	elongation factor Tu	1	1	1	1	859	191	1		176	176	176						4a9cac2c1a817d9acdec143b653b9a80_2464
group_279	tuf	elongation factor Tu	1	1	1	1	3683	281	1		176	176	176						4a9cac2c1a817d9acdec143b653b9a80_3565
F387_02056		Elongation factor Tu	1	1	1	32	1	120	1	Investigate	676	676	676																									F387_02056.p01
J7558_05680		endonuclease	9	9	1	1	533	1	210		248	791	474	B9T10_03555.p01		a04b031c37c06570dd644ef46d09ac8c_4519							614e29224da4f337b8899b3142d81070_1831	d977e7edc1a56720a787e465ab4ce472_1844	e653c257947c2dd0a414de7cb159ba14_1831		752b3971131f3206662b5e22da3b23aa_7336	83683a6c7ca473684645e0830a47223d_837							B9T12_04865.p01		B9T13_09850.p01
B9T18_04885		energy transducer TonB	19	19	1	1	1206	201	1		722	722	722	B9T10_00235.p01	BMY_1925.p01	a04b031c37c06570dd644ef46d09ac8c_7498	2cf5bec40a3ef4476bf46f509f729c16_7477			ac8fed72b32d7540cf9a1b9ac12df95a_7382	197b0243bc5bc4c380ecfb8919a026b1_3970	79ccbe49faa72747a800162f6a36c0ca_7053				31e4ba73e5ddb8c85dea419204f0df5a_7064	752b3971131f3206662b5e22da3b23aa_7269		03da1bd30b32560bef8e38ea7761d9fe_7264	c648bd7c3a222aa51bed3e3836bcf8c8_7116	B9T21_00240.p01	B9T15_04805.p01	B9T14_00235.p01	B9T11_02510.p01		B9T18_04885.p01	B9T13_00235.p01	F387_00882.p01	A6V30_01880.p01
J7602_09910		energy transducer TonB	4	4	1	1	1207	151	1		698	698	698										614e29224da4f337b8899b3142d81070_7741	d977e7edc1a56720a787e465ab4ce472_7862	e653c257947c2dd0a414de7cb159ba14_7853			83683a6c7ca473684645e0830a47223d_7792
J7561_08810		energy transducer TonB	3	3	1	1	1204	243	1		722	722	722					102e21fe2bbcace64a7555dd0bcc9007_7220	4a9cac2c1a817d9acdec143b653b9a80_6998																B9T12_00230.p01
B9T10_05715		EpsG family protein	2	2	1	1	65	1	661		1109	1109	1109	B9T10_05715.p01						ac8fed72b32d7540cf9a1b9ac12df95a_5493
J7553_08680		EpsG family protein	1	1	1	1	328	1	634		1040	1040	1040							ac8fed72b32d7540cf9a1b9ac12df95a_6889
J7554_06245		EpsG family protein	1	1	1	1	86	1	649		1115	1115	1115									79ccbe49faa72747a800162f6a36c0ca_4962
B143_RS0105115		EpsG family protein	1	1	1	1	103	1	622		1037	1037	1037																	c648bd7c3a222aa51bed3e3836bcf8c8_3992
BMY_1877		exodeoxyribonuclease V subunit gamma	1	1	1	1	1156	106	2		692	692	692		BMY_1877.p01
BMY_1880		exodeoxyribonuclease V subunit gamma	1	1	1	1	1158	158	1		470	470	470		BMY_1880.p01
BMY_1878		exodeoxyribonuclease V subunit gamma	1	1	1	1	1159	106	1		461	461	461		BMY_1878.p01
xseB		exodeoxyribonuclease VII small subunit	23	23	1	1	1046	19	3		284	284	284	B9T10_08905.p01		a04b031c37c06570dd644ef46d09ac8c_1378	2cf5bec40a3ef4476bf46f509f729c16_2264	102e21fe2bbcace64a7555dd0bcc9007_2818	4a9cac2c1a817d9acdec143b653b9a80_3189	ac8fed72b32d7540cf9a1b9ac12df95a_3105	197b0243bc5bc4c380ecfb8919a026b1_1413	79ccbe49faa72747a800162f6a36c0ca_3510	614e29224da4f337b8899b3142d81070_2408	d977e7edc1a56720a787e465ab4ce472_3531	e653c257947c2dd0a414de7cb159ba14_3514	31e4ba73e5ddb8c85dea419204f0df5a_2423	752b3971131f3206662b5e22da3b23aa_3614	83683a6c7ca473684645e0830a47223d_4784	03da1bd30b32560bef8e38ea7761d9fe_2802	c648bd7c3a222aa51bed3e3836bcf8c8_5436	B9T21_06150.p01	B9T15_08670.p01	B9T14_08640.p01	B9T11_06765.p01		B9T18_08730.p01	B9T13_07335.p01	F387_00427.p01
A6V30_01210		exodeoxyribonuclease VII small subunit	3	3	1	1	712	19	1		269	269	269		BMY_0952.p01																				B9T12_06065.p01				A6V30_01210.p01
B9T11_04250		exopolysaccharide biosynthesis polyprenyl glycosylphosphotransferase	18	18	1	1	308	1	618		986	1046	990	B9T10_05705.p01	BMY_1494.p01	a04b031c37c06570dd644ef46d09ac8c_3505	2cf5bec40a3ef4476bf46f509f729c16_4469				197b0243bc5bc4c380ecfb8919a026b1_4667		614e29224da4f337b8899b3142d81070_4711	d977e7edc1a56720a787e465ab4ce472_4990	e653c257947c2dd0a414de7cb159ba14_4811	31e4ba73e5ddb8c85dea419204f0df5a_6083		83683a6c7ca473684645e0830a47223d_5301	03da1bd30b32560bef8e38ea7761d9fe_4786			B9T15_05630.p01	B9T14_05615.p01	B9T11_04250.p01	B9T12_08430.p01	B9T18_06955.p01	B9T13_04205.p01	F387_01448.p01
J7554_06235		exopolysaccharide biosynthesis polyprenyl glycosylphosphotransferase	7	7	1	1	77	1	669		989	1274	1041					102e21fe2bbcace64a7555dd0bcc9007_4960	4a9cac2c1a817d9acdec143b653b9a80_4747	ac8fed72b32d7540cf9a1b9ac12df95a_5501		79ccbe49faa72747a800162f6a36c0ca_4954					752b3971131f3206662b5e22da3b23aa_5035				B9T21_03515.p01								A6V30_08370.p01
B143_RS0105080		exopolysaccharide biosynthesis polyprenyl glycosylphosphotransferase	2	2	1	1	108	1	619		149	986	567		BMY_1495.p01															c648bd7c3a222aa51bed3e3836bcf8c8_3964
A6V30_07875		F0F1 ATP synthase subunit A	1	1	1	1	204	3	21		815	815	815																										A6V30_07875.p01
A6V30_07895		F0F1 ATP synthase subunit alpha	1	1	1	1	208	3	17		1547	1547	1547																										A6V30_07895.p01
BMY_1402		F0F1 ATP synthase subunit B	1	1	1	1	130	252	1		407	407	407		BMY_1402.p01
A6V30_07885		F0F1 ATP synthase subunit B	1	1	1	1	206	3	19		470	470	470																										A6V30_07885.p01
BMY_1406		F0F1 ATP synthase subunit beta	1	1	1	1	174	3	8		1214	1214	1214		BMY_1406.p01
A6V30_07905		F0F1 ATP synthase subunit beta	1	1	1	1	210	3	15		1373	1373	1373																										A6V30_07905.p01
A6V30_07880		F0F1 ATP synthase subunit C	1	1	1	1	205	3	20		233	233	233																										A6V30_07880.p01
A6V30_07890		F0F1 ATP synthase subunit delta	1	1	1	1	207	3	18		554	554	554																										A6V30_07890.p01
B9T10_05285		F0F1 ATP synthase subunit epsilon	24	24	1	1	177	3	6		422	422	422	B9T10_05285.p01		a04b031c37c06570dd644ef46d09ac8c_3839	2cf5bec40a3ef4476bf46f509f729c16_4129	102e21fe2bbcace64a7555dd0bcc9007_4598	4a9cac2c1a817d9acdec143b653b9a80_5109	ac8fed72b32d7540cf9a1b9ac12df95a_5855	197b0243bc5bc4c380ecfb8919a026b1_4286	79ccbe49faa72747a800162f6a36c0ca_4604	614e29224da4f337b8899b3142d81070_5044	d977e7edc1a56720a787e465ab4ce472_4659	e653c257947c2dd0a414de7cb159ba14_5143	31e4ba73e5ddb8c85dea419204f0df5a_5748	752b3971131f3206662b5e22da3b23aa_4678	83683a6c7ca473684645e0830a47223d_4969	03da1bd30b32560bef8e38ea7761d9fe_5117	c648bd7c3a222aa51bed3e3836bcf8c8_3594	B9T21_03050.p01	B9T15_05205.p01	B9T14_05190.p01	B9T11_04675.p01	B9T12_08005.p01	B9T18_07380.p01	B9T13_03780.p01		A6V30_07230.p01
A6V30_07910		F0F1 ATP synthase subunit epsilon	2	2	1	1	211	3	14		422	422	422																									F387_01941.p01	A6V30_07910.p01
BMY_1407		F0F1 ATP synthase subunit epsilon	1	1	1	1	173	3	9		413	413	413		BMY_1407.p01
A6V30_07900		F0F1 ATP synthase subunit gamma	1	1	1	1	209	3	16		911	911	911																										A6V30_07900.p01
J7607_06005		FAD-binding oxidoreductase	1	1	1	1	677	7	19		1301	1301	1301													31e4ba73e5ddb8c85dea419204f0df5a_4772
B9T12_03290		FAD-dependent oxidoreductase	1	1	1	1	1975	1	1258		1253	1253	1253																						B9T12_03290.p01
J7607_05975		ferrous iron transport protein A	12	12	1	1	683	7	22		242	242	242		BMY_2011.p01			102e21fe2bbcace64a7555dd0bcc9007_4169	4a9cac2c1a817d9acdec143b653b9a80_2166				614e29224da4f337b8899b3142d81070_5467	d977e7edc1a56720a787e465ab4ce472_5589	e653c257947c2dd0a414de7cb159ba14_5572	31e4ba73e5ddb8c85dea419204f0df5a_4748		83683a6c7ca473684645e0830a47223d_5958				B9T15_04400.p01	B9T14_00640.p01	B9T11_02105.p01			B9T13_00640.p01
group_1937	feoB	ferrous iron transport protein B	12	12	1	1	682	7	23		2492	2492	2492		BMY_2010.p01			102e21fe2bbcace64a7555dd0bcc9007_4173	4a9cac2c1a817d9acdec143b653b9a80_2170				614e29224da4f337b8899b3142d81070_5463	d977e7edc1a56720a787e465ab4ce472_5585	e653c257947c2dd0a414de7cb159ba14_5568	31e4ba73e5ddb8c85dea419204f0df5a_4752		83683a6c7ca473684645e0830a47223d_5962				B9T15_04405.p01	B9T14_00635.p01	B9T11_02110.p01			B9T13_00635.p01
J7622_00235		Fic family protein	11	11	1	1	2255	1	718		1076	1076	1076	B9T10_04100.p01				102e21fe2bbcace64a7555dd0bcc9007_5955	4a9cac2c1a817d9acdec143b653b9a80_6009				614e29224da4f337b8899b3142d81070_6889	d977e7edc1a56720a787e465ab4ce472_7062	e653c257947c2dd0a414de7cb159ba14_7052		752b3971131f3206662b5e22da3b23aa_2360	83683a6c7ca473684645e0830a47223d_185							B9T12_04280.p01			F387_01711.p01	A6V30_04990.p01
B143_RS0101300		Fic family protein	8	8	1	1	2302	1	1739		743	743	743		BMY_0598.p01			102e21fe2bbcace64a7555dd0bcc9007_7699	4a9cac2c1a817d9acdec143b653b9a80_7739	ac8fed72b32d7540cf9a1b9ac12df95a_7797	197b0243bc5bc4c380ecfb8919a026b1_7564									c648bd7c3a222aa51bed3e3836bcf8c8_1015								F387_01175.p01	A6V30_04895.p01
J7552_09615		Fic family protein	2	2	1	1	2270	50	1		1079	1079	1079				2cf5bec40a3ef4476bf46f509f729c16_4720				197b0243bc5bc4c380ecfb8919a026b1_7622
J7552_01710		Fic family protein	1	1	1	1	3369	1	920		1121	1121	1121								197b0243bc5bc4c380ecfb8919a026b1_1360
J7552_09440		Fic family protein	1	1	1	1	2448	1	1668		1076	1076	1076								197b0243bc5bc4c380ecfb8919a026b1_7491
J7554_08580		Fic family protein	1	1	1	1	2283	1	1703		743	743	743									79ccbe49faa72747a800162f6a36c0ca_6817
B9T11_06455		Fimbrial protein	2	2	1	1	705	260	1		566	566	566																					B9T11_06455.p01				F387_00365.p01
J7607_06040		flavin reductase family protein	1	1	1	1	670	7	12		932	932	932													31e4ba73e5ddb8c85dea419204f0df5a_4800
J7607_06045		flavin-dependent monooxygenase	1	1	1	1	669	7	11		1172	1172	1172													31e4ba73e5ddb8c85dea419204f0df5a_4804
BMY_0312		formate dehydrogenase-N subunit alpha	6	6	1	1	605	1	174		2381	2429	2413		BMY_0312.p01																	B9T15_02600.p01		B9T11_00620.p01		B9T18_02975.p01		F387_00215.p01	A6V30_03730.p01
J7607_06080		fumarylacetoacetate hydrolase family protein	1	1	1	1	685	7	4		761	761	761													31e4ba73e5ddb8c85dea419204f0df5a_4832
J7607_06085		fumarylacetoacetate hydrolase family protein	1	1	1	1	686	7	3		647	647	647													31e4ba73e5ddb8c85dea419204f0df5a_4836
J7558_10020		funZ protein	1	1	1	1	2092	1	509		1634	1634	1634			a04b031c37c06570dd644ef46d09ac8c_7949
J7547_02420		gamma-aminobutyraldehyde dehydrogenase	15	15	1	1	745	1	241		239	1427	1347		BMY_1165.p01		2cf5bec40a3ef4476bf46f509f729c16_1437	102e21fe2bbcace64a7555dd0bcc9007_1929	4a9cac2c1a817d9acdec143b653b9a80_6298		197b0243bc5bc4c380ecfb8919a026b1_2222		614e29224da4f337b8899b3142d81070_3269	d977e7edc1a56720a787e465ab4ce472_4392	e653c257947c2dd0a414de7cb159ba14_4375		752b3971131f3206662b5e22da3b23aa_2793	83683a6c7ca473684645e0830a47223d_3923				B9T15_07650.p01	B9T14_07620.p01	B9T11_09915.p01			B9T13_06315.p01	F387_01806.p01
B9T12_03280		gamma-glutamyl-gamma-aminobutyraldehyde dehydrogenase	1	1	1	1	1977	1	949		1481	1481	1481																						B9T12_03280.p01
J7602_06780		GDYXXLXY domain-containing protein	23	23	1	1	1230	8	1		458	458	458	B9T10_00375.p01		a04b031c37c06570dd644ef46d09ac8c_5183	2cf5bec40a3ef4476bf46f509f729c16_3281	102e21fe2bbcace64a7555dd0bcc9007_4382	4a9cac2c1a817d9acdec143b653b9a80_2379	ac8fed72b32d7540cf9a1b9ac12df95a_5389	197b0243bc5bc4c380ecfb8919a026b1_3866	79ccbe49faa72747a800162f6a36c0ca_5826	614e29224da4f337b8899b3142d81070_5255	d977e7edc1a56720a787e465ab4ce472_5376	e653c257947c2dd0a414de7cb159ba14_5359	31e4ba73e5ddb8c85dea419204f0df5a_5040	752b3971131f3206662b5e22da3b23aa_5403	83683a6c7ca473684645e0830a47223d_6171	03da1bd30b32560bef8e38ea7761d9fe_4458		B9T21_00380.p01	B9T15_04665.p01	B9T14_00375.p01	B9T11_02370.p01	B9T12_00365.p01		B9T13_00375.p01	F387_00910.p01	A6V30_02015.p01
J7602_06405		Gfo/Idh/MocA family oxidoreductase	5	5	1	1	9	1	595		953	953	953									79ccbe49faa72747a800162f6a36c0ca_5050	614e29224da4f337b8899b3142d81070_4619	d977e7edc1a56720a787e465ab4ce472_5082	e653c257947c2dd0a414de7cb159ba14_4719			83683a6c7ca473684645e0830a47223d_5393
B143_RS0101230		GIY-YIG nuclease family protein	4	4	1	1	2538	43	1		809	809	809			a04b031c37c06570dd644ef46d09ac8c_5606													03da1bd30b32560bef8e38ea7761d9fe_5976	c648bd7c3a222aa51bed3e3836bcf8c8_959								F387_01197.p01
J7547_08040		GIY-YIG nuclease family protein	2	2	1	1	1143	33	9		1178	1178	1178					102e21fe2bbcace64a7555dd0bcc9007_6391	4a9cac2c1a817d9acdec143b653b9a80_3551
rfbA		glucose-1-phosphate thymidylyltransferase RfbA	7	7	1	1	312	1	627		875	890	887		BMY_1497.p01	a04b031c37c06570dd644ef46d09ac8c_3498					197b0243bc5bc4c380ecfb8919a026b1_4675					31e4ba73e5ddb8c85dea419204f0df5a_6091				c648bd7c3a222aa51bed3e3836bcf8c8_3972						B9T18_06945.p01			A6V30_08510.p01
pgi		glucose-6-phosphate isomerase	14	14	1	1	334	1	550		128	1625	1518		BMY_1508.p01	a04b031c37c06570dd644ef46d09ac8c_3454	2cf5bec40a3ef4476bf46f509f729c16_4505	102e21fe2bbcace64a7555dd0bcc9007_5000	4a9cac2c1a817d9acdec143b653b9a80_4707	ac8fed72b32d7540cf9a1b9ac12df95a_6873	197b0243bc5bc4c380ecfb8919a026b1_4730								03da1bd30b32560bef8e38ea7761d9fe_4750	c648bd7c3a222aa51bed3e3836bcf8c8_4008	B9T21_03550.p01	B9T15_05675.p01		B9T11_04200.p01		B9T18_06885.p01		F387_01457.p01
group_247	pgi	glucose-6-phosphate isomerase	12	12	1	1	332	1	546		1541	1625	1618	B9T10_05750.p01	BMY_1507.p01							79ccbe49faa72747a800162f6a36c0ca_4990	614e29224da4f337b8899b3142d81070_4679	d977e7edc1a56720a787e465ab4ce472_5022	e653c257947c2dd0a414de7cb159ba14_4779	31e4ba73e5ddb8c85dea419204f0df5a_6147	752b3971131f3206662b5e22da3b23aa_5063	83683a6c7ca473684645e0830a47223d_5333							B9T12_08465.p01		B9T13_04240.p01		A6V30_08405.p01
J7622_06830		glucosyltransferase domain-containing protein	17	17	1	1	3756	18	5		1436	1442	1436		BMY_1516.p01		2cf5bec40a3ef4476bf46f509f729c16_4533				197b0243bc5bc4c380ecfb8919a026b1_4758	79ccbe49faa72747a800162f6a36c0ca_5074	614e29224da4f337b8899b3142d81070_4591	d977e7edc1a56720a787e465ab4ce472_5110	e653c257947c2dd0a414de7cb159ba14_4691	31e4ba73e5ddb8c85dea419204f0df5a_7263	752b3971131f3206662b5e22da3b23aa_5139	83683a6c7ca473684645e0830a47223d_5421	03da1bd30b32560bef8e38ea7761d9fe_4722		B9T21_03580.p01	B9T15_05710.p01	B9T14_05680.p01			B9T18_06850.p01	B9T13_04330.p01		A6V30_08550.p01
group_811	murI	glutamate racemase	13	13	1	1	3535	12	3		818	827	818			a04b031c37c06570dd644ef46d09ac8c_2628		102e21fe2bbcace64a7555dd0bcc9007_3482	4a9cac2c1a817d9acdec143b653b9a80_4106	ac8fed72b32d7540cf9a1b9ac12df95a_3471							752b3971131f3206662b5e22da3b23aa_4206		03da1bd30b32560bef8e38ea7761d9fe_3181	c648bd7c3a222aa51bed3e3836bcf8c8_4754	B9T21_04565.p01	B9T15_06700.p01	B9T14_06670.p01	B9T11_03185.p01			B9T13_05375.p01	F387_00699.p01
glsA		glutaminase A	13	13	1	1	3536	12	2		923	923	923			a04b031c37c06570dd644ef46d09ac8c_2632		102e21fe2bbcace64a7555dd0bcc9007_3478	4a9cac2c1a817d9acdec143b653b9a80_4102	ac8fed72b32d7540cf9a1b9ac12df95a_3475							752b3971131f3206662b5e22da3b23aa_4202		03da1bd30b32560bef8e38ea7761d9fe_3185	c648bd7c3a222aa51bed3e3836bcf8c8_4750	B9T21_04560.p01	B9T15_06695.p01	B9T14_06665.p01	B9T11_03190.p01			B9T13_05370.p01	F387_00700.p01
J7602_02020		glutaredoxin family protein	24	24	1	1	3296	1	1037		173	245	236	B9T10_03250.p01	BMY_0526.p01	a04b031c37c06570dd644ef46d09ac8c_4296	2cf5bec40a3ef4476bf46f509f729c16_4967		4a9cac2c1a817d9acdec143b653b9a80_211	ac8fed72b32d7540cf9a1b9ac12df95a_4616	197b0243bc5bc4c380ecfb8919a026b1_5708	79ccbe49faa72747a800162f6a36c0ca_167	614e29224da4f337b8899b3142d81070_1591	d977e7edc1a56720a787e465ab4ce472_1604	e653c257947c2dd0a414de7cb159ba14_1591	31e4ba73e5ddb8c85dea419204f0df5a_794	752b3971131f3206662b5e22da3b23aa_155	83683a6c7ca473684645e0830a47223d_1077	03da1bd30b32560bef8e38ea7761d9fe_279	c648bd7c3a222aa51bed3e3836bcf8c8_1181	B9T21_08970.p01	B9T15_01490.p01	B9T14_03540.p01	B9T11_08325.p01	B9T12_03060.p01	B9T18_02030.p01	B9T13_03345.p01	F387_01114.p01
B9T12_06535		glycerol-3-phosphate cytidiltransferase	1	1	1	1	16	1	562		461	461	461																						B9T12_06535.p01
BMY_2070		glycolate permease GlcA	1	1	1	1	1363	183	1		1202	1202	1202		BMY_2070.p01
B9T12_00075		glycoside hydrolase family 32 protein	15	15	1	1	1173	28	1		950	1412	1381		BMY_1893.p01		2cf5bec40a3ef4476bf46f509f729c16_7358	102e21fe2bbcace64a7555dd0bcc9007_7344	4a9cac2c1a817d9acdec143b653b9a80_7121			79ccbe49faa72747a800162f6a36c0ca_7177	614e29224da4f337b8899b3142d81070_7617	d977e7edc1a56720a787e465ab4ce472_7739	e653c257947c2dd0a414de7cb159ba14_7731	31e4ba73e5ddb8c85dea419204f0df5a_7191		83683a6c7ca473684645e0830a47223d_7914				B9T15_04960.p01	B9T14_00080.p01	B9T11_02665.p01	B9T12_00075.p01		B9T13_00080.p01
BMY_1892		glycoside hydrolase family 32 protein	12	12	1	1	1171	28	3		464	1409	1330	B9T10_00075.p01	BMY_1892.p01	a04b031c37c06570dd644ef46d09ac8c_7628				ac8fed72b32d7540cf9a1b9ac12df95a_7511	197b0243bc5bc4c380ecfb8919a026b1_4098						752b3971131f3206662b5e22da3b23aa_7141		03da1bd30b32560bef8e38ea7761d9fe_7395	c648bd7c3a222aa51bed3e3836bcf8c8_6984	B9T21_00075.p01					B9T18_05045.p01		F387_00850.p01	A6V30_01715.p01
B9T15_06345		glycosyl transferase	16	16	1	1	3614	2	17		716	740	738	B9T10_06470.p01	BMY_1645.p01	a04b031c37c06570dd644ef46d09ac8c_2922		102e21fe2bbcace64a7555dd0bcc9007_3192	4a9cac2c1a817d9acdec143b653b9a80_3816	ac8fed72b32d7540cf9a1b9ac12df95a_3764	197b0243bc5bc4c380ecfb8919a026b1_2692					31e4ba73e5ddb8c85dea419204f0df5a_3742			03da1bd30b32560bef8e38ea7761d9fe_3475			B9T15_06345.p01	B9T14_06315.p01	B9T11_03540.p01		B9T18_06220.p01	B9T13_05020.p01	F387_00772.p01	A6V30_09180.p01
B9T21_04210		glycosyl transferase	1	1	1	1	3620	2	9		740	740	740																		B9T21_04210.p01
B9T12_08445		glycosyl transferase	1	1	1	1	64	1	646		1067	1067	1067																						B9T12_08445.p01
B9T18_06905		glycosyl transferase	1	1	1	1	85	1	655		1067	1067	1067																							B9T18_06905.p01
B9T13_04215		glycosyl transferase	1	1	1	1	306	1	607		1070	1070	1070																								B9T13_04215.p01
A6V30_08440		glycosyl transferase	1	1	1	1	27	1	578		1130	1130	1130																										A6V30_08440.p01
A6V30_08450		glycosyl transferase family 1	1	1	1	1	25	1	580		1133	1133	1133																										A6V30_08450.p01
J7554_00565		glycosyltransferase	21	21	1	1	1938	1	1126		137	137	137	B9T10_02875.p01	BMY_0451.p01	a04b031c37c06570dd644ef46d09ac8c_35			4a9cac2c1a817d9acdec143b653b9a80_513		197b0243bc5bc4c380ecfb8919a026b1_1292	79ccbe49faa72747a800162f6a36c0ca_447	614e29224da4f337b8899b3142d81070_1287	d977e7edc1a56720a787e465ab4ce472_1300	e653c257947c2dd0a414de7cb159ba14_1287			83683a6c7ca473684645e0830a47223d_1381	03da1bd30b32560bef8e38ea7761d9fe_577	c648bd7c3a222aa51bed3e3836bcf8c8_1487	B9T21_02680.p01	B9T15_01855.p01	B9T14_03175.p01	B9T11_00055.p01	B9T12_02690.p01	B9T18_02410.p01	B9T13_02735.p01	F387_00336.p01	A6V30_04300.p01
J7554_06325		glycosyltransferase	5	5	1	1	3	1	539		1133	1133	1133									79ccbe49faa72747a800162f6a36c0ca_5026	614e29224da4f337b8899b3142d81070_4643	d977e7edc1a56720a787e465ab4ce472_5058	e653c257947c2dd0a414de7cb159ba14_4743			83683a6c7ca473684645e0830a47223d_5369
J7547_06260		glycosyltransferase	4	4	1	1	322	1	636		890	893	891					102e21fe2bbcace64a7555dd0bcc9007_4984	4a9cac2c1a817d9acdec143b653b9a80_4723		197b0243bc5bc4c380ecfb8919a026b1_4715					31e4ba73e5ddb8c85dea419204f0df5a_6131
J7622_06695		glycosyltransferase	4	4	1	1	57	1	647		1067	1067	1067										614e29224da4f337b8899b3142d81070_4699	d977e7edc1a56720a787e465ab4ce472_5002	e653c257947c2dd0a414de7cb159ba14_4799			83683a6c7ca473684645e0830a47223d_5313
J7547_06255		glycosyltransferase	3	3	1	1	88	1	653		998	1007	1004					102e21fe2bbcace64a7555dd0bcc9007_4980	4a9cac2c1a817d9acdec143b653b9a80_4727			79ccbe49faa72747a800162f6a36c0ca_4970
J7553_06900		glycosyltransferase	2	2	1	1	54	1	658		1097	1121	1109	B9T10_05730.p01						ac8fed72b32d7540cf9a1b9ac12df95a_5481
A6V30_08360		glycosyltransferase	2	2	1	1	75	1	671		1112	1112	1112																	c648bd7c3a222aa51bed3e3836bcf8c8_3956									A6V30_08360.p01
J7561_06930		glycosyltransferase	2	2	1	1	2666	4	17		2921	2921	2921					102e21fe2bbcace64a7555dd0bcc9007_5482	4a9cac2c1a817d9acdec143b653b9a80_5517
J7547_06905		glycosyltransferase	2	2	1	1	2786	4	14		971	971	971					102e21fe2bbcace64a7555dd0bcc9007_5494	4a9cac2c1a817d9acdec143b653b9a80_5529
J7552_05920		glycosyltransferase	2	2	1	1	321	1	637		1847	1847	1847								197b0243bc5bc4c380ecfb8919a026b1_4711					31e4ba73e5ddb8c85dea419204f0df5a_6127
B143_RS09725		glycosyltransferase	2	2	1	1	74	1	672		962	962	962																	c648bd7c3a222aa51bed3e3836bcf8c8_3952									A6V30_08355.p01
J7558_04355		glycosyltransferase	1	1	1	1	50	1	683		821	821	821			a04b031c37c06570dd644ef46d09ac8c_3466
J7558_04365		glycosyltransferase	1	1	1	1	48	1	685		896	896	896			a04b031c37c06570dd644ef46d09ac8c_3474
J7552_06495		glycosyltransferase	1	1	1	1	2659	4	33		1151	1151	1151								197b0243bc5bc4c380ecfb8919a026b1_5166
J7554_06260		glycosyltransferase	1	1	1	1	89	1	654		890	890	890									79ccbe49faa72747a800162f6a36c0ca_4974
J7620_06410		glycosyltransferase	1	1	1	1	28	1	545		1160	1160	1160														752b3971131f3206662b5e22da3b23aa_5091
J7620_06430		glycosyltransferase	1	1	1	1	39	1	587		1106	1106	1106														752b3971131f3206662b5e22da3b23aa_5107
B143_RS0105110		glycosyltransferase	1	1	1	1	104	1	623		1238	1238	1238																	c648bd7c3a222aa51bed3e3836bcf8c8_3988
B143_RS0105120		glycosyltransferase	1	1	1	1	330	1	621		821	821	821																	c648bd7c3a222aa51bed3e3836bcf8c8_3996
A6V30_08465		glycosyltransferase	1	1	1	1	2246	1	583		1079	1079	1079																										A6V30_08465.p01
J7624_05980		glycosyltransferase family 1 protein	6	6	1	1	92	1	612		1103	1142	1135				2cf5bec40a3ef4476bf46f509f729c16_4493												03da1bd30b32560bef8e38ea7761d9fe_4762			B9T15_05660.p01	B9T14_05645.p01	B9T11_04215.p01				F387_01454.p01
J7602_06300		glycosyltransferase family 2 protein	5	5	1	1	63	1	645		758	758	758										614e29224da4f337b8899b3142d81070_4703	d977e7edc1a56720a787e465ab4ce472_4998	e653c257947c2dd0a414de7cb159ba14_4803			83683a6c7ca473684645e0830a47223d_5309							B9T12_08440.p01
J7620_06355		glycosyltransferase family 2 protein	2	2	1	1	80	1	664		941	989	965														752b3971131f3206662b5e22da3b23aa_5047												A6V30_08385.p01
J7553_08685		glycosyltransferase family 2 protein	1	1	1	1	327	1	633		788	788	788							ac8fed72b32d7540cf9a1b9ac12df95a_6893
J7554_06250		glycosyltransferase family 2 protein	1	1	1	1	87	1	650		974	974	974									79ccbe49faa72747a800162f6a36c0ca_4966
J7620_06440		glycosyltransferase family 2 protein	1	1	1	1	3762	1	589		977	977	977														752b3971131f3206662b5e22da3b23aa_5115
B9T13_04225		glycosyltransferase family 4 protein	12	12	1	1	90	1	665		1124	1151	1140		BMY_1504.p01							79ccbe49faa72747a800162f6a36c0ca_4978	614e29224da4f337b8899b3142d81070_4691	d977e7edc1a56720a787e465ab4ce472_5010	e653c257947c2dd0a414de7cb159ba14_4791		752b3971131f3206662b5e22da3b23aa_5051	83683a6c7ca473684645e0830a47223d_5321			B9T21_03535.p01				B9T12_08450.p01	B9T18_06900.p01	B9T13_04225.p01		A6V30_08390.p01
J7561_05925		glycosyltransferase family 4 protein	5	5	1	1	329	1	635		1154	1154	1154					102e21fe2bbcace64a7555dd0bcc9007_4988	4a9cac2c1a817d9acdec143b653b9a80_4719	ac8fed72b32d7540cf9a1b9ac12df95a_6885	197b0243bc5bc4c380ecfb8919a026b1_4719					31e4ba73e5ddb8c85dea419204f0df5a_6135
J7554_06310		glycosyltransferase family 4 protein	5	5	1	1	21	1	542		1238	1238	1238									79ccbe49faa72747a800162f6a36c0ca_5014	614e29224da4f337b8899b3142d81070_4655	d977e7edc1a56720a787e465ab4ce472_5046	e653c257947c2dd0a414de7cb159ba14_4755			83683a6c7ca473684645e0830a47223d_5357
J7602_06370		glycosyltransferase family 4 protein	5	5	1	1	2	1	540		1127	1127	1127									79ccbe49faa72747a800162f6a36c0ca_5022	614e29224da4f337b8899b3142d81070_4647	d977e7edc1a56720a787e465ab4ce472_5054	e653c257947c2dd0a414de7cb159ba14_4747			83683a6c7ca473684645e0830a47223d_5365
F387_01737		GMC family oxidoreductase	8	8	1	1	2601	23	2		1784	1784	1784				2cf5bec40a3ef4476bf46f509f729c16_5413														B9T21_07045.p01	B9T15_00845.p01	B9T14_04185.p01	B9T11_05525.p01	B9T12_04155.p01		B9T13_08200.p01	F387_01737.p01
J7554_02585		GMC family oxidoreductase	1	1	1	1	2602	23	4		1781	1781	1781									79ccbe49faa72747a800162f6a36c0ca_2052
J7607_06025		GMC family oxidoreductase N-terminal domain-containing protein	1	1	1	1	673	7	15		1616	1616	1616													31e4ba73e5ddb8c85dea419204f0df5a_4788
B9T10_05695		GNAT family N-acetyltransferase	24	24	1	1	297	166	1		425	431	430	B9T10_05695.p01	BMY_1492.p01	a04b031c37c06570dd644ef46d09ac8c_3513	2cf5bec40a3ef4476bf46f509f729c16_4461	102e21fe2bbcace64a7555dd0bcc9007_4932	4a9cac2c1a817d9acdec143b653b9a80_4775	ac8fed72b32d7540cf9a1b9ac12df95a_5528	197b0243bc5bc4c380ecfb8919a026b1_4659	79ccbe49faa72747a800162f6a36c0ca_4926	614e29224da4f337b8899b3142d81070_4719	d977e7edc1a56720a787e465ab4ce472_4982	e653c257947c2dd0a414de7cb159ba14_4819	31e4ba73e5ddb8c85dea419204f0df5a_6075	752b3971131f3206662b5e22da3b23aa_5007	83683a6c7ca473684645e0830a47223d_5293	03da1bd30b32560bef8e38ea7761d9fe_4794	c648bd7c3a222aa51bed3e3836bcf8c8_3924	B9T21_03465.p01			B9T11_04260.p01	B9T12_08420.p01	B9T18_06965.p01	B9T13_04195.p01	F387_01446.p01	A6V30_08320.p01
B9T14_10010		GNAT family N-acetyltransferase	11	11	1	1	2973	1	882		437	515	507		BMY_2152.p01		2cf5bec40a3ef4476bf46f509f729c16_7819			ac8fed72b32d7540cf9a1b9ac12df95a_7869						31e4ba73e5ddb8c85dea419204f0df5a_7942					B9T21_09800.p01	B9T15_10040.p01	B9T14_10010.p01	B9T11_10170.p01		B9T18_10025.p01	B9T13_10385.p01	F387_02003.p01
J7607_07680		GNAT family N-acetyltransferase	2	2	1	1	314	1	691		941	941	941								197b0243bc5bc4c380ecfb8919a026b1_4683					31e4ba73e5ddb8c85dea419204f0df5a_6099
B9T14_05605		GNAT family N-acetyltransferase	2	2	1	1	298	310	1		431	431	431																			B9T15_05620.p01	B9T14_05605.p01
BMY_0655		GNAT family N-acetyltransferase	1	1	1	1	2589	1	712		200	200	200		BMY_0655.p01
B9T18_06935		GNAT family N-acetyltransferase	1	1	1	1	310	1	688		944	944	944																							B9T18_06935.p01
J7558_06970		GPO family capsid scaffolding protein	13	13	1	1	595	1	1331		821	821	821	B9T10_02350.p01		a04b031c37c06570dd644ef46d09ac8c_5546							614e29224da4f337b8899b3142d81070_2247	d977e7edc1a56720a787e465ab4ce472_2260	e653c257947c2dd0a414de7cb159ba14_2247			83683a6c7ca473684645e0830a47223d_421	03da1bd30b32560bef8e38ea7761d9fe_7579	c648bd7c3a222aa51bed3e3836bcf8c8_1908		B9T15_02370.p01	B9T14_02665.p01	B9T11_08755.p01		B9T18_01580.p01			A6V30_07025.p01
J7558_06910		GPW/gp25 family protein	12	12	1	1	579	1	1317		374	374	374	B9T10_02290.p01		a04b031c37c06570dd644ef46d09ac8c_5499							614e29224da4f337b8899b3142d81070_2199	d977e7edc1a56720a787e465ab4ce472_2212	e653c257947c2dd0a414de7cb159ba14_2199			83683a6c7ca473684645e0830a47223d_469	03da1bd30b32560bef8e38ea7761d9fe_7626	c648bd7c3a222aa51bed3e3836bcf8c8_1956		B9T15_02430.p01	B9T14_02605.p01	B9T11_08695.p01		B9T18_01640.p01
J7552_09220		group II intron reverse transcriptase domain-containing protein	1	1	1	1	3173	45	1		1277	1277	1277								197b0243bc5bc4c380ecfb8919a026b1_7317
J7602_05440		GTP pyrophosphokinase	4	4	1	1	508	1	307		1277	1277	1277										614e29224da4f337b8899b3142d81070_3193	d977e7edc1a56720a787e465ab4ce472_4316	e653c257947c2dd0a414de7cb159ba14_4299			83683a6c7ca473684645e0830a47223d_3999
J7547_09775		HAD family hydrolase	2	2	1	1	400	1	379		686	686	686					102e21fe2bbcace64a7555dd0bcc9007_7749	4a9cac2c1a817d9acdec143b653b9a80_7691
J7561_09690		HAD-IA family hydrolase	2	2	1	1	402	1	380		1850	1850	1850					102e21fe2bbcace64a7555dd0bcc9007_7753	4a9cac2c1a817d9acdec143b653b9a80_7687
J7558_04360		haloacid dehalogenase-like hydrolase	1	1	1	1	49	1	684		659	659	659			a04b031c37c06570dd644ef46d09ac8c_3470
B9T11_08740		head completion/stabilization protein	13	13	1	1	592	1	1328		458	461	458	B9T10_02335.p01		a04b031c37c06570dd644ef46d09ac8c_5534							614e29224da4f337b8899b3142d81070_2235	d977e7edc1a56720a787e465ab4ce472_2248	e653c257947c2dd0a414de7cb159ba14_2235			83683a6c7ca473684645e0830a47223d_433	03da1bd30b32560bef8e38ea7761d9fe_7591	c648bd7c3a222aa51bed3e3836bcf8c8_1920		B9T15_02385.p01	B9T14_02650.p01	B9T11_08740.p01		B9T18_01595.p01			A6V30_07040.p01
J7620_09980		heavy metal-binding domain-containing protein	1	1	1	7	2	59	2		305	305	305														752b3971131f3206662b5e22da3b23aa_7902
J7622_00820		helix-turn-helix domain-containing protein	12	12	1	1	1454	1	1916		653	653	653	B9T10_03760.p01						ac8fed72b32d7540cf9a1b9ac12df95a_4303			614e29224da4f337b8899b3142d81070_2019	d977e7edc1a56720a787e465ab4ce472_2032	e653c257947c2dd0a414de7cb159ba14_2019		752b3971131f3206662b5e22da3b23aa_7614	83683a6c7ca473684645e0830a47223d_649			B9T21_10095.p01	B9T15_03915.p01	B9T14_01125.p01		B9T12_04625.p01		B9T13_10015.p01
B9T12_04640		helix-turn-helix domain-containing protein	11	11	1	1	1453	1	1910		869	890	873	B9T10_03745.p01			2cf5bec40a3ef4476bf46f509f729c16_3887						614e29224da4f337b8899b3142d81070_2007	d977e7edc1a56720a787e465ab4ce472_2020	e653c257947c2dd0a414de7cb159ba14_2007		752b3971131f3206662b5e22da3b23aa_7626	83683a6c7ca473684645e0830a47223d_661	03da1bd30b32560bef8e38ea7761d9fe_3847		B9T21_10030.p01				B9T12_04640.p01		B9T13_10000.p01
B143_RS0101875		helix-turn-helix domain-containing protein	10	10	1	1	555	1	1115		914	914	914	B9T10_02900.p01					4a9cac2c1a817d9acdec143b653b9a80_493				614e29224da4f337b8899b3142d81070_1305	d977e7edc1a56720a787e465ab4ce472_1318	e653c257947c2dd0a414de7cb159ba14_1305			83683a6c7ca473684645e0830a47223d_1363		c648bd7c3a222aa51bed3e3836bcf8c8_1467	B9T21_02705.p01					B9T18_02385.p01			A6V30_04325.p01
B9T11_08595		helix-turn-helix domain-containing protein	9	9	1	1	1820	1	1269		206	206	206			a04b031c37c06570dd644ef46d09ac8c_5407							614e29224da4f337b8899b3142d81070_2099	d977e7edc1a56720a787e465ab4ce472_2112	e653c257947c2dd0a414de7cb159ba14_2099			83683a6c7ca473684645e0830a47223d_569	03da1bd30b32560bef8e38ea7761d9fe_47					B9T11_08595.p01		B9T18_01735.p01			A6V30_07180.p01
J7620_03310		helix-turn-helix domain-containing protein	8	8	1	1	1432	1	1869		818	854	822			a04b031c37c06570dd644ef46d09ac8c_3995				ac8fed72b32d7540cf9a1b9ac12df95a_1307						31e4ba73e5ddb8c85dea419204f0df5a_457	752b3971131f3206662b5e22da3b23aa_2628		03da1bd30b32560bef8e38ea7761d9fe_6068					B9T11_07950.p01		B9T18_01365.p01	B9T13_02965.p01
J7624_07625		helix-turn-helix domain-containing protein	8	8	1	1	1430	1	1867		227	227	227			a04b031c37c06570dd644ef46d09ac8c_4003				ac8fed72b32d7540cf9a1b9ac12df95a_1315						31e4ba73e5ddb8c85dea419204f0df5a_449	752b3971131f3206662b5e22da3b23aa_2620		03da1bd30b32560bef8e38ea7761d9fe_6060					B9T11_07960.p01		B9T18_01355.p01	B9T13_02975.p01
B9T14_09955		helix-turn-helix domain-containing protein	8	8	1	1	2041	1	461		257	296	286				2cf5bec40a3ef4476bf46f509f729c16_7725	102e21fe2bbcace64a7555dd0bcc9007_7936	4a9cac2c1a817d9acdec143b653b9a80_7914		197b0243bc5bc4c380ecfb8919a026b1_7816	79ccbe49faa72747a800162f6a36c0ca_7564									B9T21_09735.p01	B9T15_09985.p01	B9T14_09955.p01
B9T11_05045		helix-turn-helix domain-containing protein	5	5	1	1	1474	1	5		251	251	251			a04b031c37c06570dd644ef46d09ac8c_5316	2cf5bec40a3ef4476bf46f509f729c16_3883												03da1bd30b32560bef8e38ea7761d9fe_3855		B9T21_09960.p01			B9T11_05045.p01
J7606_08320		helix-turn-helix domain-containing protein	4	4	1	1	3193	37	8		1844	1844	1844										614e29224da4f337b8899b3142d81070_6580	d977e7edc1a56720a787e465ab4ce472_6619	e653c257947c2dd0a414de7cb159ba14_6606			83683a6c7ca473684645e0830a47223d_7102
J7558_06670		helix-turn-helix domain-containing protein	1	1	1	1	1447	1	7		827	827	827			a04b031c37c06570dd644ef46d09ac8c_5308
J7558_10025		helix-turn-helix domain-containing protein	1	1	1	1	2091	1	508		380	380	380			a04b031c37c06570dd644ef46d09ac8c_7953
J7620_09915		helix-turn-helix domain-containing protein	1	1	1	1	2945	1	755		413	413	413														752b3971131f3206662b5e22da3b23aa_7855
B9T18_08425		helix-turn-helix transcriptional regulator	24	24	1	1	981	10	4		134	803	767	B9T10_08590.p01	BMY_1017.p01	a04b031c37c06570dd644ef46d09ac8c_1614	2cf5bec40a3ef4476bf46f509f729c16_2028	102e21fe2bbcace64a7555dd0bcc9007_2566	4a9cac2c1a817d9acdec143b653b9a80_2937	ac8fed72b32d7540cf9a1b9ac12df95a_2869	197b0243bc5bc4c380ecfb8919a026b1_1657	79ccbe49faa72747a800162f6a36c0ca_3262	614e29224da4f337b8899b3142d81070_2656	d977e7edc1a56720a787e465ab4ce472_3779	e653c257947c2dd0a414de7cb159ba14_3762	31e4ba73e5ddb8c85dea419204f0df5a_2667	752b3971131f3206662b5e22da3b23aa_3374	83683a6c7ca473684645e0830a47223d_4536	03da1bd30b32560bef8e38ea7761d9fe_2566	c648bd7c3a222aa51bed3e3836bcf8c8_5668	B9T21_05845.p01	B9T15_08375.p01	B9T14_08345.p01	B9T11_07060.p01	B9T12_05755.p01	B9T18_08425.p01	B9T13_07040.p01
J7558_05035		helix-turn-helix transcriptional regulator	8	8	1	1	1429	1	1866		674	674	674			a04b031c37c06570dd644ef46d09ac8c_4007				ac8fed72b32d7540cf9a1b9ac12df95a_1319						31e4ba73e5ddb8c85dea419204f0df5a_445	752b3971131f3206662b5e22da3b23aa_2616		03da1bd30b32560bef8e38ea7761d9fe_6056					B9T11_07965.p01		B9T18_01350.p01	B9T13_02980.p01
B9T10_07935		helix-turn-helix transcriptional regulator	6	6	1	1	804	1	317		320	320	320	B9T10_07935.p01				102e21fe2bbcace64a7555dd0bcc9007_2045	4a9cac2c1a817d9acdec143b653b9a80_6183							31e4ba73e5ddb8c85dea419204f0df5a_3188			03da1bd30b32560bef8e38ea7761d9fe_2045							B9T18_07770.p01
J7602_02225		helix-turn-helix transcriptional regulator	6	6	1	1	2503	1	1656		218	308	248				2cf5bec40a3ef4476bf46f509f729c16_4796					79ccbe49faa72747a800162f6a36c0ca_7712	614e29224da4f337b8899b3142d81070_1755	d977e7edc1a56720a787e465ab4ce472_1768	e653c257947c2dd0a414de7cb159ba14_1755			83683a6c7ca473684645e0830a47223d_913
J7558_06830		helix-turn-helix transcriptional regulator	5	5	1	1	1799	1	1279		695	695	695			a04b031c37c06570dd644ef46d09ac8c_5435							614e29224da4f337b8899b3142d81070_2127	d977e7edc1a56720a787e465ab4ce472_2140	e653c257947c2dd0a414de7cb159ba14_2127			83683a6c7ca473684645e0830a47223d_541
B9T11_07710		helix-turn-helix transcriptional regulator	5	5	1	1	799	1	304		326	326	326										614e29224da4f337b8899b3142d81070_3173	d977e7edc1a56720a787e465ab4ce472_4296	e653c257947c2dd0a414de7cb159ba14_4279			83683a6c7ca473684645e0830a47223d_4019						B9T11_07710.p01
A6V30_04930		helix-turn-helix transcriptional regulator	4	4	1	1	2504	1	975		308	308	308			a04b031c37c06570dd644ef46d09ac8c_4467					197b0243bc5bc4c380ecfb8919a026b1_5923								03da1bd30b32560bef8e38ea7761d9fe_107										A6V30_04930.p01
J7553_06070		helix-turn-helix transcriptional regulator	2	2	1	1	1508	1	131		179	179	179							ac8fed72b32d7540cf9a1b9ac12df95a_4818		79ccbe49faa72747a800162f6a36c0ca_6997
J7553_06075		helix-turn-helix transcriptional regulator	2	2	1	1	1509	1	132		680	680	680							ac8fed72b32d7540cf9a1b9ac12df95a_4822		79ccbe49faa72747a800162f6a36c0ca_7001
J7552_01690		helix-turn-helix transcriptional regulator	1	1	1	1	3373	1	924		677	677	677								197b0243bc5bc4c380ecfb8919a026b1_1344
J7554_08555		helix-turn-helix transcriptional regulator	1	1	1	1	2287	1	1723		437	437	437									79ccbe49faa72747a800162f6a36c0ca_6798
J7607_06000		helix-turn-helix transcriptional regulator	1	1	1	1	678	7	20		860	860	860													31e4ba73e5ddb8c85dea419204f0df5a_4768
ccmD		heme exporter protein CcmD	24	24	1	1	1001	182	1		173	173	173	B9T10_08685.p01		a04b031c37c06570dd644ef46d09ac8c_1542	2cf5bec40a3ef4476bf46f509f729c16_2100	102e21fe2bbcace64a7555dd0bcc9007_2642	4a9cac2c1a817d9acdec143b653b9a80_3013	ac8fed72b32d7540cf9a1b9ac12df95a_2941	197b0243bc5bc4c380ecfb8919a026b1_1585	79ccbe49faa72747a800162f6a36c0ca_3338	614e29224da4f337b8899b3142d81070_2584	d977e7edc1a56720a787e465ab4ce472_3707	e653c257947c2dd0a414de7cb159ba14_3690	31e4ba73e5ddb8c85dea419204f0df5a_2595	752b3971131f3206662b5e22da3b23aa_3450	83683a6c7ca473684645e0830a47223d_4608	03da1bd30b32560bef8e38ea7761d9fe_2638	c648bd7c3a222aa51bed3e3836bcf8c8_5596	B9T21_05935.p01	B9T15_08465.p01	B9T14_08435.p01	B9T11_06970.p01	B9T12_05845.p01	B9T18_08525.p01	B9T13_07130.p01	F387_00467.p01
F387_02029		hemolysin secretion D, plasmid domain protein	2	2	1	1	2205	1	827		125	269	197								197b0243bc5bc4c380ecfb8919a026b1_7946																	F387_02029.p01
B9T10_05815		hemolytic protein HlpA	2	2	1	1	44	1	555		1007	1007	1007	B9T10_05815.p01																							B9T13_04305.p01
J7554_05585		heteromeric transposase endonuclease subunit TnsA	13	13	1	1	3450	1	367		799	815	813	B9T10_07210.p01		a04b031c37c06570dd644ef46d09ac8c_2308	2cf5bec40a3ef4476bf46f509f729c16_3164				197b0243bc5bc4c380ecfb8919a026b1_3288	79ccbe49faa72747a800162f6a36c0ca_4436								c648bd7c3a222aa51bed3e3836bcf8c8_5074	B9T21_04965.p01	B9T15_07100.p01	B9T14_07070.p01	B9T11_02785.p01		B9T18_05480.p01		F387_00619.p01	A6V30_09920.p01
J7547_09820		heteromeric transposase endonuclease subunit TnsA	3	3	1	1	389	1	369		815	815	815					102e21fe2bbcace64a7555dd0bcc9007_7782	4a9cac2c1a817d9acdec143b653b9a80_7786																				A6V30_09950.p01
J7552_05500		heteromeric transposase endonuclease subunit TnsA	1	1	1	1	121	31	3		701	701	701								197b0243bc5bc4c380ecfb8919a026b1_4377
J7547_09745		histidine phosphatase family protein	2	2	1	1	394	1	373		584	584	584					102e21fe2bbcace64a7555dd0bcc9007_7725	4a9cac2c1a817d9acdec143b653b9a80_7713
J7600_02390		HK97 gp10 family phage protein	13	13	1	1	2382	1	42		335	335	335	B9T10_03630.p01		a04b031c37c06570dd644ef46d09ac8c_4587				ac8fed72b32d7540cf9a1b9ac12df95a_4200			614e29224da4f337b8899b3142d81070_1899	d977e7edc1a56720a787e465ab4ce472_1912	e653c257947c2dd0a414de7cb159ba14_1899		752b3971131f3206662b5e22da3b23aa_7416	83683a6c7ca473684645e0830a47223d_769			B9T21_02870.p01	B9T15_03770.p01	B9T14_01270.p01	B9T11_04920.p01	B9T12_04775.p01
J7624_09445		HK97 gp10 family phage protein	8	8	1	1	2337	1	1780		434	434	434							ac8fed72b32d7540cf9a1b9ac12df95a_7718		79ccbe49faa72747a800162f6a36c0ca_6892				31e4ba73e5ddb8c85dea419204f0df5a_568	752b3971131f3206662b5e22da3b23aa_7682		03da1bd30b32560bef8e38ea7761d9fe_7491					B9T11_07835.p01		B9T18_01480.p01	B9T13_02845.p01
J7552_09960		HlyD family type I secretion periplasmic adaptor subunit	1	1	1	1	3232	1	433		1433	1433	1433								197b0243bc5bc4c380ecfb8919a026b1_7887
J7624_09400		HNH endonuclease	8	8	1	1	2348	1	1792		329	329	329			a04b031c37c06570dd644ef46d09ac8c_7909				ac8fed72b32d7540cf9a1b9ac12df95a_7683						31e4ba73e5ddb8c85dea419204f0df5a_532	752b3971131f3206662b5e22da3b23aa_7717		03da1bd30b32560bef8e38ea7761d9fe_7455					B9T11_07880.p01		B9T18_01435.p01	B9T13_02895.p01
J7624_02525		HNH endonuclease	7	7	1	1	796	1	299		1055	1055	1055			a04b031c37c06570dd644ef46d09ac8c_2127				ac8fed72b32d7540cf9a1b9ac12df95a_2356		79ccbe49faa72747a800162f6a36c0ca_2751							03da1bd30b32560bef8e38ea7761d9fe_2013	c648bd7c3a222aa51bed3e3836bcf8c8_6177	B9T21_05200.p01					B9T18_07725.p01
J7552_01680		HNH endonuclease	1	1	1	1	3375	1	926		740	740	740								197b0243bc5bc4c380ecfb8919a026b1_1336
J7554_08720		HNH endonuclease	1	1	1	1	2346	1	1790		329	329	329									79ccbe49faa72747a800162f6a36c0ca_6928
J7620_09380		HNH endonuclease	1	1	1	1	2313	1	58		830	830	830														752b3971131f3206662b5e22da3b23aa_7445
B143_RS0104450		H-NS histone family protein	1	1	1	1	135	128	1		323	323	323																	c648bd7c3a222aa51bed3e3836bcf8c8_3462
hpaR		homoprotocatechuate degradation operon regulator HpaR	1	1	1	1	687	7	2		425	425	425													31e4ba73e5ddb8c85dea419204f0df5a_4840
A6V30_07805		hybrid sensor histidine kinase/response regulator	1	1	1	1	190	3	45		4886	4886	4886																										A6V30_07805.p01
B9T18_00980		hydroxyacid dehydrogenase	1	1	1	1	2919	1	407		1004	1004	1004																							B9T18_00980.p01
B9T12_03295		hydroxyproline-2-epimerase	1	1	1	1	1974	1	1259		950	950	950																						B9T12_03295.p01
J7600_09690		hypothetical protein	24	24	1	1	1192	38	3		833	842	836	B9T10_00170.p01	BMY_1912.p01	a04b031c37c06570dd644ef46d09ac8c_7554	2cf5bec40a3ef4476bf46f509f729c16_7426			ac8fed72b32d7540cf9a1b9ac12df95a_7436	197b0243bc5bc4c380ecfb8919a026b1_4026	79ccbe49faa72747a800162f6a36c0ca_7108	614e29224da4f337b8899b3142d81070_7689	d977e7edc1a56720a787e465ab4ce472_7810	e653c257947c2dd0a414de7cb159ba14_7802	31e4ba73e5ddb8c85dea419204f0df5a_7119	752b3971131f3206662b5e22da3b23aa_7217	83683a6c7ca473684645e0830a47223d_7843	03da1bd30b32560bef8e38ea7761d9fe_7320	c648bd7c3a222aa51bed3e3836bcf8c8_7060	B9T21_00170.p01	B9T15_04870.p01	B9T14_00170.p01	B9T11_02575.p01	B9T12_00165.p01	B9T18_04950.p01	B9T13_00170.p01	F387_00869.p01	A6V30_01810.p01
J7606_03300		hypothetical protein	24	24	1	1	3441	1	386		983	983	983	B9T10_07245.p01	BMY_1802.p01	a04b031c37c06570dd644ef46d09ac8c_2280	2cf5bec40a3ef4476bf46f509f729c16_3192			ac8fed72b32d7540cf9a1b9ac12df95a_7981	197b0243bc5bc4c380ecfb8919a026b1_3314	79ccbe49faa72747a800162f6a36c0ca_4464	614e29224da4f337b8899b3142d81070_3561	d977e7edc1a56720a787e465ab4ce472_3216	e653c257947c2dd0a414de7cb159ba14_2617	31e4ba73e5ddb8c85dea419204f0df5a_4370	752b3971131f3206662b5e22da3b23aa_4536	83683a6c7ca473684645e0830a47223d_3526	03da1bd30b32560bef8e38ea7761d9fe_2859	c648bd7c3a222aa51bed3e3836bcf8c8_5102	B9T21_05000.p01	B9T15_07135.p01	B9T14_07105.p01	B9T11_02750.p01	B9T12_09655.p01	B9T18_05445.p01	B9T13_05810.p01	F387_00612.p01	A6V30_09975.p01
J7607_01350		hypothetical protein	24	24	1	1	3379	1	1121		182	188	187	B9T10_02920.p01	BMY_0454.p01	a04b031c37c06570dd644ef46d09ac8c_7	2cf5bec40a3ef4476bf46f509f729c16_7		4a9cac2c1a817d9acdec143b653b9a80_477	ac8fed72b32d7540cf9a1b9ac12df95a_1291	197b0243bc5bc4c380ecfb8919a026b1_1320	79ccbe49faa72747a800162f6a36c0ca_437	614e29224da4f337b8899b3142d81070_1321	d977e7edc1a56720a787e465ab4ce472_1334	e653c257947c2dd0a414de7cb159ba14_1321	31e4ba73e5ddb8c85dea419204f0df5a_1068	752b3971131f3206662b5e22da3b23aa_433	83683a6c7ca473684645e0830a47223d_1347	03da1bd30b32560bef8e38ea7761d9fe_549		B9T21_02725.p01	B9T15_01840.p01	B9T14_03190.p01	B9T11_00040.p01	B9T12_02725.p01	B9T18_02365.p01	B9T13_02750.p01	F387_00343.p01	A6V30_04345.p01
J7600_04655		hypothetical protein	24	24	1	1	3482	139	1		773	806	774	B9T10_07050.p01		a04b031c37c06570dd644ef46d09ac8c_2436	2cf5bec40a3ef4476bf46f509f729c16_3036	102e21fe2bbcace64a7555dd0bcc9007_3674	4a9cac2c1a817d9acdec143b653b9a80_4298	ac8fed72b32d7540cf9a1b9ac12df95a_3280	197b0243bc5bc4c380ecfb8919a026b1_3160	79ccbe49faa72747a800162f6a36c0ca_4308	614e29224da4f337b8899b3142d81070_3691	d977e7edc1a56720a787e465ab4ce472_3086	e653c257947c2dd0a414de7cb159ba14_2747	31e4ba73e5ddb8c85dea419204f0df5a_4212	752b3971131f3206662b5e22da3b23aa_4398	83683a6c7ca473684645e0830a47223d_3396	03da1bd30b32560bef8e38ea7761d9fe_2989	c648bd7c3a222aa51bed3e3836bcf8c8_4946	B9T21_04805.p01	B9T15_06940.p01	B9T14_06910.p01	B9T11_02945.p01	B9T12_07675.p01	B9T18_05640.p01	B9T13_05615.p01		A6V30_09760.p01
B9T15_02760		hypothetical protein	23	23	1	1	1704	1	1388		1058	1541	1520	B9T10_01960.p01	BMY_0273.p01	a04b031c37c06570dd644ef46d09ac8c_619	2cf5bec40a3ef4476bf46f509f729c16_597		4a9cac2c1a817d9acdec143b653b9a80_1097	ac8fed72b32d7540cf9a1b9ac12df95a_701	197b0243bc5bc4c380ecfb8919a026b1_710	79ccbe49faa72747a800162f6a36c0ca_1019	614e29224da4f337b8899b3142d81070_701	d977e7edc1a56720a787e465ab4ce472_714	e653c257947c2dd0a414de7cb159ba14_701	31e4ba73e5ddb8c85dea419204f0df5a_1676	752b3971131f3206662b5e22da3b23aa_1025	83683a6c7ca473684645e0830a47223d_1967	03da1bd30b32560bef8e38ea7761d9fe_1161		B9T21_01950.p01	B9T15_02760.p01	B9T14_02280.p01	B9T11_00780.p01	B9T12_01970.p01	B9T18_03135.p01		F387_00182.p01	A6V30_03570.p01
J7561_02905		hypothetical protein	23	23	1	1	1258	5	7		383	383	383	B9T10_00450.p01	BMY_1970.p01	a04b031c37c06570dd644ef46d09ac8c_5124	2cf5bec40a3ef4476bf46f509f729c16_3342	102e21fe2bbcace64a7555dd0bcc9007_4322	4a9cac2c1a817d9acdec143b653b9a80_2319	ac8fed72b32d7540cf9a1b9ac12df95a_5329	197b0243bc5bc4c380ecfb8919a026b1_3806		614e29224da4f337b8899b3142d81070_5316	d977e7edc1a56720a787e465ab4ce472_5437	e653c257947c2dd0a414de7cb159ba14_5420	31e4ba73e5ddb8c85dea419204f0df5a_4980	752b3971131f3206662b5e22da3b23aa_5464	83683a6c7ca473684645e0830a47223d_6111	03da1bd30b32560bef8e38ea7761d9fe_4398	c648bd7c3a222aa51bed3e3836bcf8c8_7281	B9T21_00455.p01	B9T15_04590.p01	B9T14_00450.p01	B9T11_02295.p01			B9T13_00450.p01	F387_00927.p01	A6V30_02090.p01
B9T14_00115		hypothetical protein	21	21	1	1	1181	111	2		272	542	529	B9T10_00115.p01	BMY_1901.p01	a04b031c37c06570dd644ef46d09ac8c_7596		102e21fe2bbcace64a7555dd0bcc9007_7316	4a9cac2c1a817d9acdec143b653b9a80_7093	ac8fed72b32d7540cf9a1b9ac12df95a_7480			614e29224da4f337b8899b3142d81070_7645	d977e7edc1a56720a787e465ab4ce472_7766	e653c257947c2dd0a414de7cb159ba14_7759	31e4ba73e5ddb8c85dea419204f0df5a_7163	752b3971131f3206662b5e22da3b23aa_7173	83683a6c7ca473684645e0830a47223d_7887	03da1bd30b32560bef8e38ea7761d9fe_7363	c648bd7c3a222aa51bed3e3836bcf8c8_7016		B9T15_04925.p01	B9T14_00115.p01	B9T11_02630.p01	B9T12_00110.p01	B9T18_05005.p01	B9T13_00115.p01	F387_00858.p01
J7560_06105		hypothetical protein	21	21	1	1	2014	1	1005		1142	1142	1142		BMY_0559.p01	a04b031c37c06570dd644ef46d09ac8c_4419	2cf5bec40a3ef4476bf46f509f729c16_4840		4a9cac2c1a817d9acdec143b653b9a80_83	ac8fed72b32d7540cf9a1b9ac12df95a_4759	197b0243bc5bc4c380ecfb8919a026b1_5839		614e29224da4f337b8899b3142d81070_1715	d977e7edc1a56720a787e465ab4ce472_1728	e653c257947c2dd0a414de7cb159ba14_1715	31e4ba73e5ddb8c85dea419204f0df5a_670		83683a6c7ca473684645e0830a47223d_953	03da1bd30b32560bef8e38ea7761d9fe_155	c648bd7c3a222aa51bed3e3836bcf8c8_1053		B9T15_01335.p01	B9T14_03695.p01	B9T11_08480.p01	B9T12_03230.p01	B9T18_01850.p01	B9T13_03500.p01	F387_01147.p01	A6V30_04825.p01
J7620_03130		hypothetical protein	19	19	1	1	2552	44	2		2450	11453	9926	B9T10_03945.p01	BMY_0624.p01	a04b031c37c06570dd644ef46d09ac8c_5658	2cf5bec40a3ef4476bf46f509f729c16_5630				197b0243bc5bc4c380ecfb8919a026b1_5999	79ccbe49faa72747a800162f6a36c0ca_1824				31e4ba73e5ddb8c85dea419204f0df5a_301	752b3971131f3206662b5e22da3b23aa_2488	83683a6c7ca473684645e0830a47223d_313	03da1bd30b32560bef8e38ea7761d9fe_5924	c648bd7c3a222aa51bed3e3836bcf8c8_907	B9T21_06750.p01	B9T15_01120.p01	B9T14_03910.p01	B9T11_05250.p01	B9T12_04440.p01	B9T18_01180.p01	B9T13_07920.p01		A6V30_06880.p01
B9T21_05005		hypothetical protein	19	19	1	1	3440	1	387		152	10898	5899	B9T10_07250.p01		a04b031c37c06570dd644ef46d09ac8c_2276	2cf5bec40a3ef4476bf46f509f729c16_3196			ac8fed72b32d7540cf9a1b9ac12df95a_7977	197b0243bc5bc4c380ecfb8919a026b1_3318	79ccbe49faa72747a800162f6a36c0ca_4468	614e29224da4f337b8899b3142d81070_3557	d977e7edc1a56720a787e465ab4ce472_3220	e653c257947c2dd0a414de7cb159ba14_2613	31e4ba73e5ddb8c85dea419204f0df5a_4374	752b3971131f3206662b5e22da3b23aa_4540	83683a6c7ca473684645e0830a47223d_3530	03da1bd30b32560bef8e38ea7761d9fe_2855		B9T21_05005.p01	B9T15_07140.p01	B9T14_07110.p01	B9T11_02745.p01			B9T13_05815.p01	F387_00611.p01
J7602_01625		hypothetical protein	18	18	1	1	1936	1	1128		932	932	932	B9T10_02865.p01	BMY_0448.p01	a04b031c37c06570dd644ef46d09ac8c_43	2cf5bec40a3ef4476bf46f509f729c16_21		4a9cac2c1a817d9acdec143b653b9a80_521	ac8fed72b32d7540cf9a1b9ac12df95a_1277	197b0243bc5bc4c380ecfb8919a026b1_1284		614e29224da4f337b8899b3142d81070_1279	d977e7edc1a56720a787e465ab4ce472_1292	e653c257947c2dd0a414de7cb159ba14_1279	31e4ba73e5ddb8c85dea419204f0df5a_1100	752b3971131f3206662b5e22da3b23aa_447	83683a6c7ca473684645e0830a47223d_1389	03da1bd30b32560bef8e38ea7761d9fe_585	c648bd7c3a222aa51bed3e3836bcf8c8_1495	B9T21_02670.p01				B9T12_02680.p01			F387_00334.p01
B9T11_03625		hypothetical protein	18	18	1	1	3638	71	1		2129	3377	3289	B9T10_06385.p01	BMY_1627.p01		2cf5bec40a3ef4476bf46f509f729c16_2574						614e29224da4f337b8899b3142d81070_4151	d977e7edc1a56720a787e465ab4ce472_2626	e653c257947c2dd0a414de7cb159ba14_3207	31e4ba73e5ddb8c85dea419204f0df5a_3674	752b3971131f3206662b5e22da3b23aa_3924	83683a6c7ca473684645e0830a47223d_2936	03da1bd30b32560bef8e38ea7761d9fe_3543		B9T21_04125.p01	B9T15_06260.p01	B9T14_06230.p01	B9T11_03625.p01	B9T12_07105.p01		B9T13_04935.p01	F387_00789.p01	A6V30_09090.p01
B9T18_02405		hypothetical protein	17	17	1	1	1939	1	1125		710	710	710	B9T10_02880.p01		a04b031c37c06570dd644ef46d09ac8c_31	2cf5bec40a3ef4476bf46f509f729c16_13		4a9cac2c1a817d9acdec143b653b9a80_509	ac8fed72b32d7540cf9a1b9ac12df95a_1285	197b0243bc5bc4c380ecfb8919a026b1_1296	79ccbe49faa72747a800162f6a36c0ca_443				31e4ba73e5ddb8c85dea419204f0df5a_1092			03da1bd30b32560bef8e38ea7761d9fe_573		B9T21_02685.p01	B9T15_01850.p01	B9T14_03180.p01	B9T11_00050.p01	B9T12_02695.p01	B9T18_02405.p01	B9T13_02740.p01		A6V30_04305.p01
J7607_04670		hypothetical protein	17	17	1	1	3630	2	18		374	374	374	B9T10_06420.p01	BMY_1635.p01	a04b031c37c06570dd644ef46d09ac8c_2962		102e21fe2bbcace64a7555dd0bcc9007_3152	4a9cac2c1a817d9acdec143b653b9a80_3776	ac8fed72b32d7540cf9a1b9ac12df95a_3804	197b0243bc5bc4c380ecfb8919a026b1_2652					31e4ba73e5ddb8c85dea419204f0df5a_3702			03da1bd30b32560bef8e38ea7761d9fe_3515		B9T21_04160.p01	B9T15_06295.p01	B9T14_06265.p01	B9T11_03590.p01		B9T18_06270.p01	B9T13_04970.p01	F387_00782.p01	A6V30_09130.p01
J7553_04775		hypothetical protein	17	17	1	1	3627	2	21		440	440	440	B9T10_06435.p01	BMY_1638.p01	a04b031c37c06570dd644ef46d09ac8c_2950		102e21fe2bbcace64a7555dd0bcc9007_3164	4a9cac2c1a817d9acdec143b653b9a80_3788	ac8fed72b32d7540cf9a1b9ac12df95a_3792	197b0243bc5bc4c380ecfb8919a026b1_2664					31e4ba73e5ddb8c85dea419204f0df5a_3714			03da1bd30b32560bef8e38ea7761d9fe_3503		B9T21_04175.p01	B9T15_06310.p01	B9T14_06280.p01	B9T11_03575.p01		B9T18_06255.p01	B9T13_04985.p01	F387_00779.p01	A6V30_09145.p01
B9T14_06290		hypothetical protein	17	17	1	1	3625	2	26		563	566	564	B9T10_06445.p01	BMY_1640.p01	a04b031c37c06570dd644ef46d09ac8c_2942		102e21fe2bbcace64a7555dd0bcc9007_3172	4a9cac2c1a817d9acdec143b653b9a80_3796	ac8fed72b32d7540cf9a1b9ac12df95a_3784	197b0243bc5bc4c380ecfb8919a026b1_2672					31e4ba73e5ddb8c85dea419204f0df5a_3722			03da1bd30b32560bef8e38ea7761d9fe_3495		B9T21_04185.p01	B9T15_06320.p01	B9T14_06290.p01	B9T11_03565.p01		B9T18_06245.p01	B9T13_04995.p01	F387_00777.p01	A6V30_09155.p01
J7554_03625		hypothetical protein	17	17	1	1	880	209	1		173	173	173		BMY_1117.p01	a04b031c37c06570dd644ef46d09ac8c_2000	2cf5bec40a3ef4476bf46f509f729c16_1644	102e21fe2bbcace64a7555dd0bcc9007_2180	4a9cac2c1a817d9acdec143b653b9a80_2551	ac8fed72b32d7540cf9a1b9ac12df95a_2483	197b0243bc5bc4c380ecfb8919a026b1_2043	79ccbe49faa72747a800162f6a36c0ca_2878	614e29224da4f337b8899b3142d81070_3042	d977e7edc1a56720a787e465ab4ce472_4165	e653c257947c2dd0a414de7cb159ba14_4148	31e4ba73e5ddb8c85dea419204f0df5a_3053	752b3971131f3206662b5e22da3b23aa_2988	83683a6c7ca473684645e0830a47223d_4150	03da1bd30b32560bef8e38ea7761d9fe_2180	c648bd7c3a222aa51bed3e3836bcf8c8_6050								F387_00587.p01
J7547_04245		hypothetical protein	17	17	1	1	3562	26	2		143	143	143		BMY_1694.p01	a04b031c37c06570dd644ef46d09ac8c_2733	2cf5bec40a3ef4476bf46f509f729c16_2751	102e21fe2bbcace64a7555dd0bcc9007_3377	4a9cac2c1a817d9acdec143b653b9a80_4001	ac8fed72b32d7540cf9a1b9ac12df95a_3576	197b0243bc5bc4c380ecfb8919a026b1_2875	79ccbe49faa72747a800162f6a36c0ca_4024	614e29224da4f337b8899b3142d81070_3976	d977e7edc1a56720a787e465ab4ce472_2801	e653c257947c2dd0a414de7cb159ba14_3032	31e4ba73e5ddb8c85dea419204f0df5a_3927	752b3971131f3206662b5e22da3b23aa_4101	83683a6c7ca473684645e0830a47223d_3111	03da1bd30b32560bef8e38ea7761d9fe_3286	c648bd7c3a222aa51bed3e3836bcf8c8_4649								F387_00725.p01
J7607_07380		hypothetical protein	17	17	1	1	242	295	1		1685	1688	1687			a04b031c37c06570dd644ef46d09ac8c_3728				ac8fed72b32d7540cf9a1b9ac12df95a_5741	197b0243bc5bc4c380ecfb8919a026b1_4445		614e29224da4f337b8899b3142d81070_4933	d977e7edc1a56720a787e465ab4ce472_4769	e653c257947c2dd0a414de7cb159ba14_5032	31e4ba73e5ddb8c85dea419204f0df5a_5862	752b3971131f3206662b5e22da3b23aa_4792	83683a6c7ca473684645e0830a47223d_5080	03da1bd30b32560bef8e38ea7761d9fe_5007		B9T21_03195.p01	B9T15_05350.p01	B9T14_05335.p01	B9T11_04530.p01	B9T12_08150.p01	B9T18_07235.p01	B9T13_03925.p01
J7607_01340		hypothetical protein	17	17	1	1	3368	1	1109		2576	17675	11905	B9T10_02925.p01	BMY_0457.p01		2cf5bec40a3ef4476bf46f509f729c16_5229		4a9cac2c1a817d9acdec143b653b9a80_473			79ccbe49faa72747a800162f6a36c0ca_433	614e29224da4f337b8899b3142d81070_1325	d977e7edc1a56720a787e465ab4ce472_1338	e653c257947c2dd0a414de7cb159ba14_1325	31e4ba73e5ddb8c85dea419204f0df5a_1060	752b3971131f3206662b5e22da3b23aa_429	83683a6c7ca473684645e0830a47223d_1343	03da1bd30b32560bef8e38ea7761d9fe_545	c648bd7c3a222aa51bed3e3836bcf8c8_1451					B9T12_02730.p01	B9T18_02360.p01		F387_01049.p01	A6V30_04350.p01
B9T12_04765		hypothetical protein	17	17	1	1	2380	1	52		317	386	377	B9T10_03640.p01	BMY_0028.p01	a04b031c37c06570dd644ef46d09ac8c_4595	2cf5bec40a3ef4476bf46f509f729c16_3985			ac8fed72b32d7540cf9a1b9ac12df95a_4208			614e29224da4f337b8899b3142d81070_1907	d977e7edc1a56720a787e465ab4ce472_1920	e653c257947c2dd0a414de7cb159ba14_1907		752b3971131f3206662b5e22da3b23aa_7423	83683a6c7ca473684645e0830a47223d_761	03da1bd30b32560bef8e38ea7761d9fe_8006		B9T21_10135.p01	B9T15_03780.p01	B9T14_01260.p01	B9T11_04930.p01	B9T12_04765.p01		B9T13_09880.p01
BMY_0851		hypothetical protein	17	17	1	1	2694	238	1		137	137	137		BMY_0851.p01	a04b031c37c06570dd644ef46d09ac8c_7743	2cf5bec40a3ef4476bf46f509f729c16_7540	102e21fe2bbcace64a7555dd0bcc9007_7628	4a9cac2c1a817d9acdec143b653b9a80_7620	ac8fed72b32d7540cf9a1b9ac12df95a_7627	197b0243bc5bc4c380ecfb8919a026b1_7693	79ccbe49faa72747a800162f6a36c0ca_7450	614e29224da4f337b8899b3142d81070_7804	d977e7edc1a56720a787e465ab4ce472_7924	e653c257947c2dd0a414de7cb159ba14_7916	31e4ba73e5ddb8c85dea419204f0df5a_7657	752b3971131f3206662b5e22da3b23aa_7502	83683a6c7ca473684645e0830a47223d_6802	03da1bd30b32560bef8e38ea7761d9fe_7833	c648bd7c3a222aa51bed3e3836bcf8c8_46								F387_01547.p01
B9T18_06225		hypothetical protein	16	16	1	1	3615	2	30		932	968	965	B9T10_06465.p01	BMY_1644.p01	a04b031c37c06570dd644ef46d09ac8c_2926		102e21fe2bbcace64a7555dd0bcc9007_3188	4a9cac2c1a817d9acdec143b653b9a80_3812	ac8fed72b32d7540cf9a1b9ac12df95a_3768	197b0243bc5bc4c380ecfb8919a026b1_2688					31e4ba73e5ddb8c85dea419204f0df5a_3738			03da1bd30b32560bef8e38ea7761d9fe_3479			B9T15_06340.p01	B9T14_06310.p01	B9T11_03545.p01		B9T18_06225.p01	B9T13_05015.p01	F387_00773.p01	A6V30_09175.p01
B9T11_03535		hypothetical protein	16	16	1	1	3613	2	16		296	350	346	B9T10_06475.p01	BMY_1646.p01	a04b031c37c06570dd644ef46d09ac8c_2918		102e21fe2bbcace64a7555dd0bcc9007_3196	4a9cac2c1a817d9acdec143b653b9a80_3820	ac8fed72b32d7540cf9a1b9ac12df95a_3760	197b0243bc5bc4c380ecfb8919a026b1_2696					31e4ba73e5ddb8c85dea419204f0df5a_3746			03da1bd30b32560bef8e38ea7761d9fe_3471			B9T15_06350.p01	B9T14_06320.p01	B9T11_03535.p01		B9T18_06215.p01	B9T13_05025.p01	F387_00771.p01	A6V30_09185.p01
BMY_0464		hypothetical protein	16	16	1	1	3361	1	1100		167	173	167		BMY_0464.p01	a04b031c37c06570dd644ef46d09ac8c_4058	2cf5bec40a3ef4476bf46f509f729c16_5203		4a9cac2c1a817d9acdec143b653b9a80_446	ac8fed72b32d7540cf9a1b9ac12df95a_4374	197b0243bc5bc4c380ecfb8919a026b1_5469	79ccbe49faa72747a800162f6a36c0ca_406	614e29224da4f337b8899b3142d81070_1352	d977e7edc1a56720a787e465ab4ce472_1365	e653c257947c2dd0a414de7cb159ba14_1352	31e4ba73e5ddb8c85dea419204f0df5a_1033	752b3971131f3206662b5e22da3b23aa_402	83683a6c7ca473684645e0830a47223d_1316	03da1bd30b32560bef8e38ea7761d9fe_518	c648bd7c3a222aa51bed3e3836bcf8c8_1416								F387_01056.p01
B9T11_08775		hypothetical protein	16	16	1	1	3390	1	914		476	476	476	B9T10_03490.p01	BMY_0013.p01	a04b031c37c06570dd644ef46d09ac8c_4495	2cf5bec40a3ef4476bf46f509f729c16_7681			ac8fed72b32d7540cf9a1b9ac12df95a_4100			614e29224da4f337b8899b3142d81070_1779	d977e7edc1a56720a787e465ab4ce472_1792	e653c257947c2dd0a414de7cb159ba14_1779		752b3971131f3206662b5e22da3b23aa_7312	83683a6c7ca473684645e0830a47223d_889	03da1bd30b32560bef8e38ea7761d9fe_7752		B9T21_02745.p01	B9T15_03655.p01	B9T14_01385.p01	B9T11_08775.p01			B9T13_03585.p01
F387_00776		hypothetical protein	16	16	1	1	3618	2	27		2288	2297	2296	B9T10_06450.p01	BMY_1641.p01	a04b031c37c06570dd644ef46d09ac8c_2938		102e21fe2bbcace64a7555dd0bcc9007_3176	4a9cac2c1a817d9acdec143b653b9a80_3800	ac8fed72b32d7540cf9a1b9ac12df95a_3780	197b0243bc5bc4c380ecfb8919a026b1_2676					31e4ba73e5ddb8c85dea419204f0df5a_3726			03da1bd30b32560bef8e38ea7761d9fe_3491			B9T15_06325.p01	B9T14_06295.p01	B9T11_03560.p01		B9T18_06240.p01	B9T13_05000.p01	F387_00776.p01	A6V30_09160.p01
J7560_04005		hypothetical protein	16	16	1	1	3446	1	383		1562	1562	1562	B9T10_07230.p01		a04b031c37c06570dd644ef46d09ac8c_2292	2cf5bec40a3ef4476bf46f509f729c16_3180	102e21fe2bbcace64a7555dd0bcc9007_7767	4a9cac2c1a817d9acdec143b653b9a80_7802		197b0243bc5bc4c380ecfb8919a026b1_3302	79ccbe49faa72747a800162f6a36c0ca_4452				31e4ba73e5ddb8c85dea419204f0df5a_4358				c648bd7c3a222aa51bed3e3836bcf8c8_5090	B9T21_04985.p01	B9T15_07120.p01	B9T14_07090.p01	B9T11_02765.p01		B9T18_05460.p01	B9T13_05795.p01	F387_00615.p01
J7560_01830		hypothetical protein	16	16	1	1	739	1	246		3326	3326	3326	B9T10_07840.p01	BMY_1160.p01		2cf5bec40a3ef4476bf46f509f729c16_1457	102e21fe2bbcace64a7555dd0bcc9007_1949	4a9cac2c1a817d9acdec143b653b9a80_6278		197b0243bc5bc4c380ecfb8919a026b1_2202		614e29224da4f337b8899b3142d81070_3249	d977e7edc1a56720a787e465ab4ce472_4372	e653c257947c2dd0a414de7cb159ba14_4355		752b3971131f3206662b5e22da3b23aa_2813	83683a6c7ca473684645e0830a47223d_3943				B9T15_07675.p01	B9T14_07645.p01				B9T13_06340.p01	F387_01811.p01	A6V30_00205.p01
J7622_02815		hypothetical protein	16	16	1	1	1632	1	1466		167	167	167		BMY_0202.p01	a04b031c37c06570dd644ef46d09ac8c_887	2cf5bec40a3ef4476bf46f509f729c16_865		4a9cac2c1a817d9acdec143b653b9a80_1365	ac8fed72b32d7540cf9a1b9ac12df95a_433	197b0243bc5bc4c380ecfb8919a026b1_442	79ccbe49faa72747a800162f6a36c0ca_1287	614e29224da4f337b8899b3142d81070_433	d977e7edc1a56720a787e465ab4ce472_446	e653c257947c2dd0a414de7cb159ba14_433	31e4ba73e5ddb8c85dea419204f0df5a_1944	752b3971131f3206662b5e22da3b23aa_1293	83683a6c7ca473684645e0830a47223d_2235	03da1bd30b32560bef8e38ea7761d9fe_1429	c648bd7c3a222aa51bed3e3836bcf8c8_2525								F387_00114.p01
J7554_09315		hypothetical protein	16	16	1	1	2709	58	1		152	152	152		BMY_0835.p01	a04b031c37c06570dd644ef46d09ac8c_7684	2cf5bec40a3ef4476bf46f509f729c16_7599	102e21fe2bbcace64a7555dd0bcc9007_7687	4a9cac2c1a817d9acdec143b653b9a80_7679	ac8fed72b32d7540cf9a1b9ac12df95a_7567		79ccbe49faa72747a800162f6a36c0ca_7386	614e29224da4f337b8899b3142d81070_7863	d977e7edc1a56720a787e465ab4ce472_7984	e653c257947c2dd0a414de7cb159ba14_7976	31e4ba73e5ddb8c85dea419204f0df5a_7597	752b3971131f3206662b5e22da3b23aa_7565	83683a6c7ca473684645e0830a47223d_6743	03da1bd30b32560bef8e38ea7761d9fe_7774	c648bd7c3a222aa51bed3e3836bcf8c8_106								F387_01562.p01
B9T18_06235		hypothetical protein	16	16	1	1	3617	2	28		524	596	591	B9T10_06455.p01	BMY_1642.p01	a04b031c37c06570dd644ef46d09ac8c_2934		102e21fe2bbcace64a7555dd0bcc9007_3180	4a9cac2c1a817d9acdec143b653b9a80_3804	ac8fed72b32d7540cf9a1b9ac12df95a_3776	197b0243bc5bc4c380ecfb8919a026b1_2680					31e4ba73e5ddb8c85dea419204f0df5a_3730			03da1bd30b32560bef8e38ea7761d9fe_3487			B9T15_06330.p01	B9T14_06300.p01	B9T11_03555.p01		B9T18_06235.p01	B9T13_05005.p01	F387_00775.p01	A6V30_09165.p01
B9T13_05030		hypothetical protein	16	16	1	1	3612	2	15		1310	1346	1324	B9T10_06480.p01	BMY_1647.p01	a04b031c37c06570dd644ef46d09ac8c_2914		102e21fe2bbcace64a7555dd0bcc9007_3200	4a9cac2c1a817d9acdec143b653b9a80_3824	ac8fed72b32d7540cf9a1b9ac12df95a_3756	197b0243bc5bc4c380ecfb8919a026b1_2700					31e4ba73e5ddb8c85dea419204f0df5a_3750			03da1bd30b32560bef8e38ea7761d9fe_3467			B9T15_06355.p01	B9T14_06325.p01	B9T11_03530.p01		B9T18_06210.p01	B9T13_05030.p01	F387_00770.p01	A6V30_09190.p01
J7607_00805		hypothetical protein	16	16	1	1	2508	1	986		446	446	446	B9T10_03475.p01		a04b031c37c06570dd644ef46d09ac8c_4483	2cf5bec40a3ef4476bf46f509f729c16_4782					79ccbe49faa72747a800162f6a36c0ca_7728	614e29224da4f337b8899b3142d81070_1767	d977e7edc1a56720a787e465ab4ce472_1780	e653c257947c2dd0a414de7cb159ba14_1767	31e4ba73e5ddb8c85dea419204f0df5a_634		83683a6c7ca473684645e0830a47223d_901	03da1bd30b32560bef8e38ea7761d9fe_91			B9T15_01260.p01	B9T14_03770.p01	B9T11_08550.p01		B9T18_01790.p01	B9T13_03570.p01		A6V30_04950.p01
J7547_04030		hypothetical protein	16	16	1	1	3611	2	14		536	590	546	B9T10_06485.p01	BMY_1648.p01	a04b031c37c06570dd644ef46d09ac8c_2910		102e21fe2bbcace64a7555dd0bcc9007_3204	4a9cac2c1a817d9acdec143b653b9a80_3828	ac8fed72b32d7540cf9a1b9ac12df95a_3752	197b0243bc5bc4c380ecfb8919a026b1_2704					31e4ba73e5ddb8c85dea419204f0df5a_3754			03da1bd30b32560bef8e38ea7761d9fe_3463			B9T15_06360.p01	B9T14_06330.p01	B9T11_03525.p01		B9T18_06205.p01	B9T13_05035.p01	F387_00769.p01	A6V30_09195.p01
B9T10_06505		hypothetical protein	16	16	1	1	3605	2	3		686	686	686	B9T10_06505.p01	BMY_1652.p01	a04b031c37c06570dd644ef46d09ac8c_2894		102e21fe2bbcace64a7555dd0bcc9007_3220	4a9cac2c1a817d9acdec143b653b9a80_3844	ac8fed72b32d7540cf9a1b9ac12df95a_3736	197b0243bc5bc4c380ecfb8919a026b1_2720					31e4ba73e5ddb8c85dea419204f0df5a_3770			03da1bd30b32560bef8e38ea7761d9fe_3447			B9T15_06380.p01	B9T14_06350.p01	B9T11_03505.p01		B9T18_06185.p01	B9T13_05055.p01	F387_00765.p01	A6V30_09215.p01
J7558_04140		hypothetical protein	16	16	1	1	3716	25	5		479	479	479			a04b031c37c06570dd644ef46d09ac8c_3294		102e21fe2bbcace64a7555dd0bcc9007_5160	4a9cac2c1a817d9acdec143b653b9a80_4547	ac8fed72b32d7540cf9a1b9ac12df95a_6715	197b0243bc5bc4c380ecfb8919a026b1_4890		614e29224da4f337b8899b3142d81070_4459	d977e7edc1a56720a787e465ab4ce472_5242	e653c257947c2dd0a414de7cb159ba14_4560		752b3971131f3206662b5e22da3b23aa_5271	83683a6c7ca473684645e0830a47223d_5552	03da1bd30b32560bef8e38ea7761d9fe_4590	c648bd7c3a222aa51bed3e3836bcf8c8_4168		B9T15_05875.p01	B9T14_05845.p01	B9T11_04010.p01			B9T13_04495.p01
B9T10_03635		hypothetical protein	16	16	1	1	2381	1	43		350	350	350	B9T10_03635.p01		a04b031c37c06570dd644ef46d09ac8c_4591	2cf5bec40a3ef4476bf46f509f729c16_3989			ac8fed72b32d7540cf9a1b9ac12df95a_4204			614e29224da4f337b8899b3142d81070_1903	d977e7edc1a56720a787e465ab4ce472_1916	e653c257947c2dd0a414de7cb159ba14_1903		752b3971131f3206662b5e22da3b23aa_7419	83683a6c7ca473684645e0830a47223d_765	03da1bd30b32560bef8e38ea7761d9fe_8010		B9T21_10130.p01	B9T15_03775.p01	B9T14_01265.p01	B9T11_04925.p01	B9T12_04770.p01		B9T13_09875.p01
B9T15_03875		hypothetical protein	15	15	1	1	1448	1	1852		424	431	429	B9T10_03720.p01		a04b031c37c06570dd644ef46d09ac8c_5288				ac8fed72b32d7540cf9a1b9ac12df95a_4271			614e29224da4f337b8899b3142d81070_1987	d977e7edc1a56720a787e465ab4ce472_2000	e653c257947c2dd0a414de7cb159ba14_1987		752b3971131f3206662b5e22da3b23aa_7646	83683a6c7ca473684645e0830a47223d_681	03da1bd30b32560bef8e38ea7761d9fe_3827		B9T21_10005.p01	B9T15_03875.p01	B9T14_01165.p01	B9T11_05010.p01	B9T12_04665.p01		B9T13_09975.p01
J7624_04840		hypothetical protein	15	15	1	1	1456	1	1911		278	278	278	B9T10_03750.p01		a04b031c37c06570dd644ef46d09ac8c_5312				ac8fed72b32d7540cf9a1b9ac12df95a_4295			614e29224da4f337b8899b3142d81070_2011	d977e7edc1a56720a787e465ab4ce472_2024	e653c257947c2dd0a414de7cb159ba14_2011		752b3971131f3206662b5e22da3b23aa_7622	83683a6c7ca473684645e0830a47223d_657	03da1bd30b32560bef8e38ea7761d9fe_3851		B9T21_10035.p01	B9T15_03905.p01	B9T14_01135.p01	B9T11_05040.p01	B9T12_04635.p01		B9T13_10005.p01
B9T13_09985		hypothetical protein	15	15	1	1	1450	1	1854		470	470	470	B9T10_03730.p01		a04b031c37c06570dd644ef46d09ac8c_5296				ac8fed72b32d7540cf9a1b9ac12df95a_4279			614e29224da4f337b8899b3142d81070_1995	d977e7edc1a56720a787e465ab4ce472_2008	e653c257947c2dd0a414de7cb159ba14_1995		752b3971131f3206662b5e22da3b23aa_7638	83683a6c7ca473684645e0830a47223d_673	03da1bd30b32560bef8e38ea7761d9fe_3835		B9T21_10015.p01	B9T15_03885.p01	B9T14_01155.p01	B9T11_05020.p01	B9T12_04655.p01		B9T13_09985.p01
J7602_02590		hypothetical protein	15	15	1	1	1497	1	1642		155	203	199		BMY_0008.p01	a04b031c37c06570dd644ef46d09ac8c_5352	2cf5bec40a3ef4476bf46f509f729c16_3851			ac8fed72b32d7540cf9a1b9ac12df95a_4335			614e29224da4f337b8899b3142d81070_2047	d977e7edc1a56720a787e465ab4ce472_2060	e653c257947c2dd0a414de7cb159ba14_2047		752b3971131f3206662b5e22da3b23aa_7582	83683a6c7ca473684645e0830a47223d_621	03da1bd30b32560bef8e38ea7761d9fe_3887		B9T21_10050.p01	B9T15_03945.p01	B9T14_01095.p01		B9T12_04600.p01		B9T13_10045.p01
J7600_02415		hypothetical protein	15	15	1	1	2376	1	55		1004	1010	1006	B9T10_03655.p01		a04b031c37c06570dd644ef46d09ac8c_4607				ac8fed72b32d7540cf9a1b9ac12df95a_4220			614e29224da4f337b8899b3142d81070_1919	d977e7edc1a56720a787e465ab4ce472_1932	e653c257947c2dd0a414de7cb159ba14_1919		752b3971131f3206662b5e22da3b23aa_7435	83683a6c7ca473684645e0830a47223d_749	03da1bd30b32560bef8e38ea7761d9fe_7994		B9T21_10110.p01	B9T15_03795.p01	B9T14_01245.p01	B9T11_04945.p01	B9T12_04750.p01		B9T13_09895.p01
J7620_09620		hypothetical protein	15	15	1	1	1451	1	1855		269	269	269	B9T10_03735.p01		a04b031c37c06570dd644ef46d09ac8c_5300				ac8fed72b32d7540cf9a1b9ac12df95a_4283			614e29224da4f337b8899b3142d81070_1999	d977e7edc1a56720a787e465ab4ce472_2012	e653c257947c2dd0a414de7cb159ba14_1999		752b3971131f3206662b5e22da3b23aa_7634	83683a6c7ca473684645e0830a47223d_669	03da1bd30b32560bef8e38ea7761d9fe_3839		B9T21_10020.p01	B9T15_03890.p01	B9T14_01150.p01	B9T11_05025.p01	B9T12_04650.p01		B9T13_09990.p01
B9T12_04645		hypothetical protein	15	15	1	1	1452	1	1856		494	503	498	B9T10_03740.p01		a04b031c37c06570dd644ef46d09ac8c_5304				ac8fed72b32d7540cf9a1b9ac12df95a_4287			614e29224da4f337b8899b3142d81070_2003	d977e7edc1a56720a787e465ab4ce472_2016	e653c257947c2dd0a414de7cb159ba14_2003		752b3971131f3206662b5e22da3b23aa_7630	83683a6c7ca473684645e0830a47223d_665	03da1bd30b32560bef8e38ea7761d9fe_3843		B9T21_10025.p01	B9T15_03895.p01	B9T14_01145.p01	B9T11_05030.p01	B9T12_04645.p01		B9T13_09995.p01
B9T13_09890		hypothetical protein	15	15	1	1	2377	1	54		217	758	721	B9T10_03650.p01		a04b031c37c06570dd644ef46d09ac8c_4603				ac8fed72b32d7540cf9a1b9ac12df95a_4216			614e29224da4f337b8899b3142d81070_1915	d977e7edc1a56720a787e465ab4ce472_1928	e653c257947c2dd0a414de7cb159ba14_1915		752b3971131f3206662b5e22da3b23aa_7431	83683a6c7ca473684645e0830a47223d_753	03da1bd30b32560bef8e38ea7761d9fe_7998		B9T21_10105.p01	B9T15_03790.p01	B9T14_01250.p01	B9T11_04940.p01	B9T12_04755.p01		B9T13_09890.p01
B9T13_08330		hypothetical protein	14	14	1	1	2847	9	4		404	413	404		BMY_0708.p01		2cf5bec40a3ef4476bf46f509f729c16_6149				197b0243bc5bc4c380ecfb8919a026b1_7871		614e29224da4f337b8899b3142d81070_8001	d977e7edc1a56720a787e465ab4ce472_8021	e653c257947c2dd0a414de7cb159ba14_7988	31e4ba73e5ddb8c85dea419204f0df5a_7902		83683a6c7ca473684645e0830a47223d_8001			B9T21_07175.p01	B9T15_00715.p01	B9T14_04315.p01	B9T11_05655.p01	B9T12_04025.p01		B9T13_08330.p01
J7606_10075		hypothetical protein	14	14	1	1	2851	9	7		380	398	381		BMY_0706.p01		2cf5bec40a3ef4476bf46f509f729c16_6161				197b0243bc5bc4c380ecfb8919a026b1_7863		614e29224da4f337b8899b3142d81070_8012	d977e7edc1a56720a787e465ab4ce472_8006	e653c257947c2dd0a414de7cb159ba14_7996	31e4ba73e5ddb8c85dea419204f0df5a_7870		83683a6c7ca473684645e0830a47223d_7989			B9T21_07165.p01	B9T15_00725.p01	B9T14_04305.p01	B9T11_05645.p01	B9T12_04035.p01		B9T13_08320.p01
J7606_00515		hypothetical protein	14	14	1	1	1627	1	1473		401	401	401	B9T10_01595.p01			2cf5bec40a3ef4476bf46f509f729c16_889		4a9cac2c1a817d9acdec143b653b9a80_1389		197b0243bc5bc4c380ecfb8919a026b1_418	79ccbe49faa72747a800162f6a36c0ca_1311	614e29224da4f337b8899b3142d81070_409	d977e7edc1a56720a787e465ab4ce472_422	e653c257947c2dd0a414de7cb159ba14_409	31e4ba73e5ddb8c85dea419204f0df5a_1968		83683a6c7ca473684645e0830a47223d_2259	03da1bd30b32560bef8e38ea7761d9fe_1453		B9T21_01585.p01				B9T12_01605.p01			F387_00108.p01
B9T10_02235		hypothetical protein	13	13	1	1	1792	1	1301		980	1049	1001	B9T10_02235.p01		a04b031c37c06570dd644ef46d09ac8c_5455							614e29224da4f337b8899b3142d81070_2155	d977e7edc1a56720a787e465ab4ce472_2168	e653c257947c2dd0a414de7cb159ba14_2155			83683a6c7ca473684645e0830a47223d_513	03da1bd30b32560bef8e38ea7761d9fe_7670	c648bd7c3a222aa51bed3e3836bcf8c8_2004		B9T15_02480.p01	B9T14_02555.p01	B9T11_08645.p01		B9T18_01690.p01			A6V30_07140.p01
B9T15_02445		hypothetical protein	13	13	1	1	576	1	1314		803	1355	1149	B9T10_02275.p01		a04b031c37c06570dd644ef46d09ac8c_5487							614e29224da4f337b8899b3142d81070_2187	d977e7edc1a56720a787e465ab4ce472_2200	e653c257947c2dd0a414de7cb159ba14_2187			83683a6c7ca473684645e0830a47223d_481	03da1bd30b32560bef8e38ea7761d9fe_7638	c648bd7c3a222aa51bed3e3836bcf8c8_1968		B9T15_02445.p01	B9T14_02590.p01	B9T11_08680.p01		B9T18_01655.p01			A6V30_07100.p01
J7624_09595		hypothetical protein	13	13	1	1	584	1	1322		362	362	362	B9T10_02310.p01		a04b031c37c06570dd644ef46d09ac8c_5515							614e29224da4f337b8899b3142d81070_2215	d977e7edc1a56720a787e465ab4ce472_2228	e653c257947c2dd0a414de7cb159ba14_2215			83683a6c7ca473684645e0830a47223d_453	03da1bd30b32560bef8e38ea7761d9fe_7611	c648bd7c3a222aa51bed3e3836bcf8c8_1940		B9T15_02410.p01	B9T14_02625.p01	B9T11_08715.p01		B9T18_01620.p01			A6V30_07065.p01
J7602_02390		hypothetical protein	13	13	1	1	2385	1	39		401	401	401	B9T10_03615.p01		a04b031c37c06570dd644ef46d09ac8c_4575				ac8fed72b32d7540cf9a1b9ac12df95a_4188			614e29224da4f337b8899b3142d81070_1887	d977e7edc1a56720a787e465ab4ce472_1900	e653c257947c2dd0a414de7cb159ba14_1887		752b3971131f3206662b5e22da3b23aa_7404	83683a6c7ca473684645e0830a47223d_781			B9T21_02855.p01	B9T15_03755.p01	B9T14_01285.p01	B9T11_04905.p01	B9T12_04790.p01
J7622_00980		hypothetical protein	13	13	1	1	2384	1	40		443	443	443	B9T10_03620.p01		a04b031c37c06570dd644ef46d09ac8c_4579				ac8fed72b32d7540cf9a1b9ac12df95a_4192			614e29224da4f337b8899b3142d81070_1891	d977e7edc1a56720a787e465ab4ce472_1904	e653c257947c2dd0a414de7cb159ba14_1891		752b3971131f3206662b5e22da3b23aa_7408	83683a6c7ca473684645e0830a47223d_777			B9T21_02860.p01	B9T15_03760.p01	B9T14_01280.p01	B9T11_04910.p01	B9T12_04785.p01
B9T21_09910		hypothetical protein	13	13	1	1	2357	1	1828		308	791	721			a04b031c37c06570dd644ef46d09ac8c_4635				ac8fed72b32d7540cf9a1b9ac12df95a_7916			614e29224da4f337b8899b3142d81070_1947	d977e7edc1a56720a787e465ab4ce472_1960	e653c257947c2dd0a414de7cb159ba14_1947		752b3971131f3206662b5e22da3b23aa_7938	83683a6c7ca473684645e0830a47223d_721	03da1bd30b32560bef8e38ea7761d9fe_8044		B9T21_09910.p01	B9T15_03830.p01	B9T14_01210.p01		B9T12_04700.p01		B9T13_09930.p01
J7561_07705		hypothetical protein	13	13	1	1	2553	44	3		1148	9023	3297					102e21fe2bbcace64a7555dd0bcc9007_6079	4a9cac2c1a817d9acdec143b653b9a80_6132	ac8fed72b32d7540cf9a1b9ac12df95a_1447	197b0243bc5bc4c380ecfb8919a026b1_6003		614e29224da4f337b8899b3142d81070_6761	d977e7edc1a56720a787e465ab4ce472_7188	e653c257947c2dd0a414de7cb159ba14_7180	31e4ba73e5ddb8c85dea419204f0df5a_297				c648bd7c3a222aa51bed3e3836bcf8c8_903						B9T18_01175.p01	B9T13_07925.p01	F387_01680.p01	A6V30_06875.p01
J7622_00545		hypothetical protein	13	13	1	1	593	1	1329		659	659	659	B9T10_02340.p01		a04b031c37c06570dd644ef46d09ac8c_5538							614e29224da4f337b8899b3142d81070_2239	d977e7edc1a56720a787e465ab4ce472_2252	e653c257947c2dd0a414de7cb159ba14_2239			83683a6c7ca473684645e0830a47223d_429	03da1bd30b32560bef8e38ea7761d9fe_7587	c648bd7c3a222aa51bed3e3836bcf8c8_1916		B9T15_02380.p01	B9T14_02655.p01	B9T11_08745.p01		B9T18_01590.p01			A6V30_07035.p01
J7620_09645		hypothetical protein	13	13	1	1	2199	1	1850		746	770	749	B9T10_03710.p01	BMY_0042.p01		2cf5bec40a3ef4476bf46f509f729c16_3907			ac8fed72b32d7540cf9a1b9ac12df95a_4263			614e29224da4f337b8899b3142d81070_1963	d977e7edc1a56720a787e465ab4ce472_1976	e653c257947c2dd0a414de7cb159ba14_1963		752b3971131f3206662b5e22da3b23aa_7654	83683a6c7ca473684645e0830a47223d_705	03da1bd30b32560bef8e38ea7761d9fe_3819		B9T21_10070.p01			B9T11_05000.p01			B9T13_09965.p01
B9T15_02390		hypothetical protein	13	13	1	1	591	1	1327		206	206	206	B9T10_02330.p01		a04b031c37c06570dd644ef46d09ac8c_5530							614e29224da4f337b8899b3142d81070_2231	d977e7edc1a56720a787e465ab4ce472_2244	e653c257947c2dd0a414de7cb159ba14_2231			83683a6c7ca473684645e0830a47223d_437	03da1bd30b32560bef8e38ea7761d9fe_7595	c648bd7c3a222aa51bed3e3836bcf8c8_1924		B9T15_02390.p01	B9T14_02645.p01	B9T11_08735.p01		B9T18_01600.p01			A6V30_07045.p01
J7622_00990		hypothetical protein	13	13	1	1	2386	1	38		248	248	248	B9T10_03610.p01		a04b031c37c06570dd644ef46d09ac8c_4571				ac8fed72b32d7540cf9a1b9ac12df95a_4184			614e29224da4f337b8899b3142d81070_1883	d977e7edc1a56720a787e465ab4ce472_1896	e653c257947c2dd0a414de7cb159ba14_1883		752b3971131f3206662b5e22da3b23aa_7400	83683a6c7ca473684645e0830a47223d_785			B9T21_02850.p01	B9T15_03750.p01	B9T14_01290.p01	B9T11_04900.p01	B9T12_04795.p01
B9T10_03625		hypothetical protein	13	13	1	1	2383	1	41		392	392	392	B9T10_03625.p01		a04b031c37c06570dd644ef46d09ac8c_4583				ac8fed72b32d7540cf9a1b9ac12df95a_4196			614e29224da4f337b8899b3142d81070_1895	d977e7edc1a56720a787e465ab4ce472_1908	e653c257947c2dd0a414de7cb159ba14_1895		752b3971131f3206662b5e22da3b23aa_7412	83683a6c7ca473684645e0830a47223d_773			B9T21_02865.p01	B9T15_03765.p01	B9T14_01275.p01	B9T11_04915.p01	B9T12_04780.p01
J7624_00045		hypothetical protein	12	12	1	1	1806	1	1272		350	350	350			a04b031c37c06570dd644ef46d09ac8c_5419							614e29224da4f337b8899b3142d81070_2111	d977e7edc1a56720a787e465ab4ce472_2124	e653c257947c2dd0a414de7cb159ba14_2111			83683a6c7ca473684645e0830a47223d_557	03da1bd30b32560bef8e38ea7761d9fe_35	c648bd7c3a222aa51bed3e3836bcf8c8_2028		B9T15_02515.p01	B9T14_02520.p01	B9T11_08610.p01		B9T18_01720.p01			A6V30_07165.p01
J7558_07395		hypothetical protein	12	12	1	1	2643	29	6		353	353	353	B9T10_04395.p01		a04b031c37c06570dd644ef46d09ac8c_5877		102e21fe2bbcace64a7555dd0bcc9007_7813	4a9cac2c1a817d9acdec143b653b9a80_5753	ac8fed72b32d7540cf9a1b9ac12df95a_1749		79ccbe49faa72747a800162f6a36c0ca_2148					752b3971131f3206662b5e22da3b23aa_2174		03da1bd30b32560bef8e38ea7761d9fe_5257	c648bd7c3a222aa51bed3e3836bcf8c8_573						B9T18_00710.p01		F387_02017.p01	A6V30_05220.p01
J7600_04055		hypothetical protein	12	12	1	1	847	1	288		1517	1517	1517	B9T10_07875.p01	BMY_1153.p01			102e21fe2bbcace64a7555dd0bcc9007_1981	4a9cac2c1a817d9acdec143b653b9a80_6246				614e29224da4f337b8899b3142d81070_3217	d977e7edc1a56720a787e465ab4ce472_4340	e653c257947c2dd0a414de7cb159ba14_4323		752b3971131f3206662b5e22da3b23aa_2849	83683a6c7ca473684645e0830a47223d_3975				B9T15_07715.p01	B9T14_07685.p01				B9T13_06380.p01
B9T14_09540		hypothetical protein	12	12	1	1	3060	236	1		119	119	119	B9T10_09610.p01						ac8fed72b32d7540cf9a1b9ac12df95a_6001	197b0243bc5bc4c380ecfb8919a026b1_7470					31e4ba73e5ddb8c85dea419204f0df5a_6540	752b3971131f3206662b5e22da3b23aa_6338			c648bd7c3a222aa51bed3e3836bcf8c8_6701	B9T21_08440.p01	B9T15_09570.p01	B9T14_09540.p01	B9T11_09120.p01	B9T12_08675.p01		B9T13_09515.p01
J7600_06875		hypothetical protein	12	12	1	1	681	7	24		305	311	306		BMY_2009.p01			102e21fe2bbcace64a7555dd0bcc9007_4177	4a9cac2c1a817d9acdec143b653b9a80_2174				614e29224da4f337b8899b3142d81070_5459	d977e7edc1a56720a787e465ab4ce472_5581	e653c257947c2dd0a414de7cb159ba14_5564	31e4ba73e5ddb8c85dea419204f0df5a_4756		83683a6c7ca473684645e0830a47223d_5966				B9T15_04410.p01	B9T14_00630.p01	B9T11_02115.p01			B9T13_00630.p01
J7607_09995		hypothetical protein	12	12	1	1	2935	1	868		299	299	299		BMY_2156.p01			102e21fe2bbcace64a7555dd0bcc9007_7894	4a9cac2c1a817d9acdec143b653b9a80_7866		197b0243bc5bc4c380ecfb8919a026b1_7844					31e4ba73e5ddb8c85dea419204f0df5a_7922	752b3971131f3206662b5e22da3b23aa_7737				B9T21_09650.p01	B9T15_09950.p01	B9T14_09920.p01			B9T18_10120.p01		F387_02048.p01	A6V30_10360.p01
B9T18_10010		hypothetical protein	12	12	1	1	2981	1	878		191	191	191					102e21fe2bbcace64a7555dd0bcc9007_7890	4a9cac2c1a817d9acdec143b653b9a80_7870	ac8fed72b32d7540cf9a1b9ac12df95a_7857	197b0243bc5bc4c380ecfb8919a026b1_7779	79ccbe49faa72747a800162f6a36c0ca_7584					752b3971131f3206662b5e22da3b23aa_7741				B9T21_09785.p01	B9T15_10025.p01	B9T14_09995.p01	B9T11_10150.p01		B9T18_10010.p01			A6V30_10070.p01
J7558_06735		hypothetical protein	12	12	1	1	1495	1	1647		265	650	585	B9T10_03795.p01		a04b031c37c06570dd644ef46d09ac8c_5360				ac8fed72b32d7540cf9a1b9ac12df95a_4343		79ccbe49faa72747a800162f6a36c0ca_7012	614e29224da4f337b8899b3142d81070_2055	d977e7edc1a56720a787e465ab4ce472_2068	e653c257947c2dd0a414de7cb159ba14_2055			83683a6c7ca473684645e0830a47223d_613			B9T21_10040.p01			B9T11_05090.p01	B9T12_04590.p01		B9T13_10055.p01
J7620_09600		hypothetical protein	12	12	1	1	1455	1	1912		227	236	232	B9T10_03755.p01						ac8fed72b32d7540cf9a1b9ac12df95a_4299			614e29224da4f337b8899b3142d81070_2015	d977e7edc1a56720a787e465ab4ce472_2028	e653c257947c2dd0a414de7cb159ba14_2015		752b3971131f3206662b5e22da3b23aa_7618	83683a6c7ca473684645e0830a47223d_653			B9T21_10100.p01	B9T15_03910.p01	B9T14_01130.p01		B9T12_04630.p01		B9T13_10010.p01
B9T15_07725		hypothetical protein	12	12	1	1	849	1	291		569	995	959	B9T10_07885.p01	BMY_1150.p01			102e21fe2bbcace64a7555dd0bcc9007_1989	4a9cac2c1a817d9acdec143b653b9a80_6238				614e29224da4f337b8899b3142d81070_3209	d977e7edc1a56720a787e465ab4ce472_4332	e653c257947c2dd0a414de7cb159ba14_4315		752b3971131f3206662b5e22da3b23aa_2857	83683a6c7ca473684645e0830a47223d_3983				B9T15_07725.p01	B9T14_07695.p01				B9T13_06390.p01
J7606_05445		hypothetical protein	12	12	1	1	848	1	290		581	638	621	B9T10_07880.p01	BMY_1152.p01			102e21fe2bbcace64a7555dd0bcc9007_1985	4a9cac2c1a817d9acdec143b653b9a80_6242				614e29224da4f337b8899b3142d81070_3213	d977e7edc1a56720a787e465ab4ce472_4336	e653c257947c2dd0a414de7cb159ba14_4319		752b3971131f3206662b5e22da3b23aa_2853	83683a6c7ca473684645e0830a47223d_3979				B9T15_07720.p01	B9T14_07690.p01				B9T13_06385.p01
J7606_02440		hypothetical protein	11	11	1	1	2368	1	1803		229	254	251			a04b031c37c06570dd644ef46d09ac8c_4627							614e29224da4f337b8899b3142d81070_1939	d977e7edc1a56720a787e465ab4ce472_1952	e653c257947c2dd0a414de7cb159ba14_1939		752b3971131f3206662b5e22da3b23aa_7456	83683a6c7ca473684645e0830a47223d_729	03da1bd30b32560bef8e38ea7761d9fe_8060		B9T21_09985.p01	B9T15_03820.p01	B9T14_01220.p01	B9T11_04970.p01
J7600_04080		hypothetical protein	11	11	1	1	725	1	255		509	524	519				2cf5bec40a3ef4476bf46f509f729c16_1469	102e21fe2bbcace64a7555dd0bcc9007_1961	4a9cac2c1a817d9acdec143b653b9a80_6266				614e29224da4f337b8899b3142d81070_3237	d977e7edc1a56720a787e465ab4ce472_4360	e653c257947c2dd0a414de7cb159ba14_4343		752b3971131f3206662b5e22da3b23aa_2825	83683a6c7ca473684645e0830a47223d_3955				B9T15_07690.p01	B9T14_07660.p01				B9T13_06355.p01
B9T11_08725		hypothetical protein	11	11	1	1	587	1	1325		209	209	209	B9T10_02320.p01		a04b031c37c06570dd644ef46d09ac8c_5523							614e29224da4f337b8899b3142d81070_2223	d977e7edc1a56720a787e465ab4ce472_2236	e653c257947c2dd0a414de7cb159ba14_2223			83683a6c7ca473684645e0830a47223d_445	03da1bd30b32560bef8e38ea7761d9fe_7603	c648bd7c3a222aa51bed3e3836bcf8c8_1932				B9T11_08725.p01		B9T18_01610.p01			A6V30_07055.p01
B9T15_03870		hypothetical protein	11	11	1	1	1442	1	1905		470	470	470			a04b031c37c06570dd644ef46d09ac8c_3979				ac8fed72b32d7540cf9a1b9ac12df95a_7883		79ccbe49faa72747a800162f6a36c0ca_6970				31e4ba73e5ddb8c85dea419204f0df5a_473	752b3971131f3206662b5e22da3b23aa_2644		03da1bd30b32560bef8e38ea7761d9fe_6083			B9T15_03870.p01	B9T14_01170.p01	B9T11_07930.p01		B9T18_01385.p01	B9T13_02945.p01
B9T13_06365		hypothetical protein	11	11	1	1	844	1	257		236	236	236				2cf5bec40a3ef4476bf46f509f729c16_1477	102e21fe2bbcace64a7555dd0bcc9007_1969	4a9cac2c1a817d9acdec143b653b9a80_6258				614e29224da4f337b8899b3142d81070_3229	d977e7edc1a56720a787e465ab4ce472_4352	e653c257947c2dd0a414de7cb159ba14_4335		752b3971131f3206662b5e22da3b23aa_2833	83683a6c7ca473684645e0830a47223d_3963				B9T15_07700.p01	B9T14_07670.p01				B9T13_06365.p01
J7561_00140		hypothetical protein	11	11	1	1	3271	1	940		164	164	164				2cf5bec40a3ef4476bf46f509f729c16_4868		4a9cac2c1a817d9acdec143b653b9a80_111	ac8fed72b32d7540cf9a1b9ac12df95a_4715			614e29224da4f337b8899b3142d81070_1691	d977e7edc1a56720a787e465ab4ce472_1704	e653c257947c2dd0a414de7cb159ba14_1691	31e4ba73e5ddb8c85dea419204f0df5a_694	752b3971131f3206662b5e22da3b23aa_55	83683a6c7ca473684645e0830a47223d_977		c648bd7c3a222aa51bed3e3836bcf8c8_1081								F387_01139.p01
J7558_04325		hypothetical protein	11	11	1	1	339	1	554		1271	1298	1286	B9T10_05820.p01	BMY_1512.p01	a04b031c37c06570dd644ef46d09ac8c_3442	2cf5bec40a3ef4476bf46f509f729c16_4517												03da1bd30b32560bef8e38ea7761d9fe_4738			B9T15_05690.p01	B9T14_05660.p01	B9T11_04185.p01	B9T12_06540.p01		B9T13_04310.p01	F387_01460.p01
J7560_09955		hypothetical protein	11	11	1	1	3412	1	911		182	2060	498				2cf5bec40a3ef4476bf46f509f729c16_7869	102e21fe2bbcace64a7555dd0bcc9007_7189	4a9cac2c1a817d9acdec143b653b9a80_7760							31e4ba73e5ddb8c85dea419204f0df5a_7586					B9T21_09810.p01	B9T15_07175.p01	B9T14_07145.p01	B9T11_10240.p01	B9T12_09620.p01		B9T13_05835.p01	F387_02011.p01
B9T13_02950		hypothetical protein	11	11	1	1	1443	1	1906		125	404	378		BMY_0045.p01	a04b031c37c06570dd644ef46d09ac8c_3983	2cf5bec40a3ef4476bf46f509f729c16_3899			ac8fed72b32d7540cf9a1b9ac12df95a_8007		79ccbe49faa72747a800162f6a36c0ca_6974				31e4ba73e5ddb8c85dea419204f0df5a_469	752b3971131f3206662b5e22da3b23aa_2640		03da1bd30b32560bef8e38ea7761d9fe_6079					B9T11_07935.p01		B9T18_01380.p01	B9T13_02950.p01
B9T21_09805		hypothetical protein	11	11	1	1	2972	1	883		269	269	269		BMY_2151.p01		2cf5bec40a3ef4476bf46f509f729c16_7823			ac8fed72b32d7540cf9a1b9ac12df95a_7873						31e4ba73e5ddb8c85dea419204f0df5a_7938					B9T21_09805.p01	B9T15_10045.p01	B9T14_10015.p01	B9T11_10175.p01		B9T18_10030.p01	B9T13_10390.p01	F387_02002.p01
J7602_05430		hypothetical protein	11	11	1	1	802	1	319		191	191	191	B9T10_07925.p01				102e21fe2bbcace64a7555dd0bcc9007_2033	4a9cac2c1a817d9acdec143b653b9a80_6195				614e29224da4f337b8899b3142d81070_3185	d977e7edc1a56720a787e465ab4ce472_4308	e653c257947c2dd0a414de7cb159ba14_4291	31e4ba73e5ddb8c85dea419204f0df5a_3200		83683a6c7ca473684645e0830a47223d_4007	03da1bd30b32560bef8e38ea7761d9fe_2033					B9T11_07720.p01		B9T18_07760.p01
J7602_02795		hypothetical protein	11	11	1	1	583	1	1321		356	356	356	B9T10_02305.p01									614e29224da4f337b8899b3142d81070_2211	d977e7edc1a56720a787e465ab4ce472_2224	e653c257947c2dd0a414de7cb159ba14_2211			83683a6c7ca473684645e0830a47223d_457		c648bd7c3a222aa51bed3e3836bcf8c8_1944		B9T15_02415.p01	B9T14_02620.p01	B9T11_08710.p01		B9T18_01625.p01			A6V30_07070.p01
F387_02009		hypothetical protein	10	10	1	1	3261	1	857		560	560	560	B9T10_04150.p01			2cf5bec40a3ef4476bf46f509f729c16_7697	102e21fe2bbcace64a7555dd0bcc9007_7827	4a9cac2c1a817d9acdec143b653b9a80_7839	ac8fed72b32d7540cf9a1b9ac12df95a_7841						31e4ba73e5ddb8c85dea419204f0df5a_7882										B9T18_09975.p01	B9T13_10350.p01	F387_02009.p01	A6V30_10010.p01
J7622_04460		hypothetical protein	10	10	1	1	3434	1	359		191	887	817		BMY_1806.p01					ac8fed72b32d7540cf9a1b9ac12df95a_7147	197b0243bc5bc4c380ecfb8919a026b1_7275		614e29224da4f337b8899b3142d81070_3543	d977e7edc1a56720a787e465ab4ce472_3234	e653c257947c2dd0a414de7cb159ba14_2599			83683a6c7ca473684645e0830a47223d_3544		c648bd7c3a222aa51bed3e3836bcf8c8_7291						B9T18_05430.p01		F387_01902.p01
B9T11_08465		hypothetical protein	10	10	1	1	2020	1	943		359	359	359	B9T10_03400.p01					4a9cac2c1a817d9acdec143b653b9a80_95		197b0243bc5bc4c380ecfb8919a026b1_5827	79ccbe49faa72747a800162f6a36c0ca_51										B9T15_01350.p01	B9T14_03680.p01	B9T11_08465.p01	B9T12_03215.p01		B9T13_03485.p01	F387_01144.p01
J7606_02790		hypothetical protein	10	10	1	1	585	1	1323		245	245	245	B9T10_02315.p01									614e29224da4f337b8899b3142d81070_2219	d977e7edc1a56720a787e465ab4ce472_2232	e653c257947c2dd0a414de7cb159ba14_2219			83683a6c7ca473684645e0830a47223d_449	03da1bd30b32560bef8e38ea7761d9fe_7607	c648bd7c3a222aa51bed3e3836bcf8c8_1936				B9T11_08720.p01		B9T18_01615.p01			A6V30_07060.p01
J7560_04900		hypothetical protein	10	10	1	1	1445	1	1908		266	302	298	B9T10_10115.p01		a04b031c37c06570dd644ef46d09ac8c_3987	2cf5bec40a3ef4476bf46f509f729c16_3895			ac8fed72b32d7540cf9a1b9ac12df95a_1299						31e4ba73e5ddb8c85dea419204f0df5a_465	752b3971131f3206662b5e22da3b23aa_2636		03da1bd30b32560bef8e38ea7761d9fe_6076					B9T11_07940.p01		B9T18_01375.p01	B9T13_02955.p01
B9T11_01145		hypothetical protein	10	10	1	1	626	1	1471		401	401	401			a04b031c37c06570dd644ef46d09ac8c_911				ac8fed72b32d7540cf9a1b9ac12df95a_409							752b3971131f3206662b5e22da3b23aa_1317			c648bd7c3a222aa51bed3e3836bcf8c8_2549		B9T15_03125.p01	B9T14_01915.p01	B9T11_01145.p01		B9T18_03500.p01	B9T13_01600.p01		A6V30_03210.p01
J7607_00705		hypothetical protein	9	9	1	1	2340	1	1784		398	398	398			a04b031c37c06570dd644ef46d09ac8c_7885				ac8fed72b32d7540cf9a1b9ac12df95a_7706		79ccbe49faa72747a800162f6a36c0ca_6904				31e4ba73e5ddb8c85dea419204f0df5a_556	752b3971131f3206662b5e22da3b23aa_7693		03da1bd30b32560bef8e38ea7761d9fe_7479					B9T11_07850.p01		B9T18_01465.p01	B9T13_02865.p01
B9T12_04160		hypothetical protein	9	9	1	1	2603	23	1		689	689	689				2cf5bec40a3ef4476bf46f509f729c16_5417					79ccbe49faa72747a800162f6a36c0ca_2048									B9T21_07040.p01	B9T15_00850.p01	B9T14_04180.p01	B9T11_05520.p01	B9T12_04160.p01		B9T13_08195.p01	F387_01736.p01
B9T14_04045		hypothetical protein	9	9	1	1	2581	249	1		335	404	396				2cf5bec40a3ef4476bf46f509f729c16_5522						614e29224da4f337b8899b3142d81070_6869	d977e7edc1a56720a787e465ab4ce472_7082	e653c257947c2dd0a414de7cb159ba14_7072			83683a6c7ca473684645e0830a47223d_205				B9T15_00985.p01	B9T14_04045.p01	B9T11_05385.p01			B9T13_08060.p01
J7560_04895		hypothetical protein	9	9	1	1	1446	1	1909		491	563	548		BMY_0046.p01	a04b031c37c06570dd644ef46d09ac8c_3991	2cf5bec40a3ef4476bf46f509f729c16_3891									31e4ba73e5ddb8c85dea419204f0df5a_461	752b3971131f3206662b5e22da3b23aa_2632		03da1bd30b32560bef8e38ea7761d9fe_6072					B9T11_07945.p01		B9T18_01370.p01	B9T13_02960.p01
J7622_00805		hypothetical protein	9	9	1	1	1417	1	1634		152	152	152			a04b031c37c06570dd644ef46d09ac8c_5336	2cf5bec40a3ef4476bf46f509f729c16_3867			ac8fed72b32d7540cf9a1b9ac12df95a_4319			614e29224da4f337b8899b3142d81070_2031	d977e7edc1a56720a787e465ab4ce472_2044	e653c257947c2dd0a414de7cb159ba14_2031		752b3971131f3206662b5e22da3b23aa_7598	83683a6c7ca473684645e0830a47223d_637	03da1bd30b32560bef8e38ea7761d9fe_3871
J7561_09785		hypothetical protein	9	9	1	1	482	1	910		512	512	512					102e21fe2bbcace64a7555dd0bcc9007_7193	4a9cac2c1a817d9acdec143b653b9a80_7757							31e4ba73e5ddb8c85dea419204f0df5a_7582					B9T21_09815.p01	B9T15_07170.p01	B9T14_07140.p01	B9T11_10245.p01			B9T13_05830.p01	F387_02012.p01
B9T18_10110		hypothetical protein	9	9	1	1	3251	1	838		482	482	482							ac8fed72b32d7540cf9a1b9ac12df95a_7815						31e4ba73e5ddb8c85dea419204f0df5a_7821	752b3971131f3206662b5e22da3b23aa_7877				B9T21_09660.p01	B9T15_09865.p01	B9T14_09835.p01			B9T18_10110.p01		F387_01996.p01	A6V30_10120.p01
B9T18_03205		hypothetical protein	9	9	1	1	1690	1	1411	Hypothetical protein with no hits to refseq/uniprot/clusters/cdd/tigrfams/pfam overlapping another protein with hits	194	221	203	B9T10_01890.p01	BMY_0259.p01																B9T21_01880.p01	B9T15_02830.p01	B9T14_02210.p01	B9T11_00850.p01		B9T18_03205.p01	B9T13_01895.p01	F387_00168.p01
J7606_02630		hypothetical protein	9	9	1	1	1818	1	1267		242	254	243			a04b031c37c06570dd644ef46d09ac8c_5399							614e29224da4f337b8899b3142d81070_2091	d977e7edc1a56720a787e465ab4ce472_2104	e653c257947c2dd0a414de7cb159ba14_2091			83683a6c7ca473684645e0830a47223d_577	03da1bd30b32560bef8e38ea7761d9fe_55					B9T11_08585.p01		B9T18_01745.p01			A6V30_07190.p01
J7602_02450		hypothetical protein	9	9	1	1	2371	1	1800		341	341	341							ac8fed72b32d7540cf9a1b9ac12df95a_4236		79ccbe49faa72747a800162f6a36c0ca_6935	614e29224da4f337b8899b3142d81070_1935	d977e7edc1a56720a787e465ab4ce472_1948	e653c257947c2dd0a414de7cb159ba14_1935			83683a6c7ca473684645e0830a47223d_733			B9T21_09990.p01			B9T11_04965.p01			B9T13_09915.p01
J7558_09975		hypothetical protein	8	8	1	1	2351	1	1795		302	302	302			a04b031c37c06570dd644ef46d09ac8c_7913				ac8fed72b32d7540cf9a1b9ac12df95a_7679						31e4ba73e5ddb8c85dea419204f0df5a_528	752b3971131f3206662b5e22da3b23aa_7721		03da1bd30b32560bef8e38ea7761d9fe_7451					B9T11_07885.p01		B9T18_01430.p01	B9T13_02900.p01
J7553_05435		hypothetical protein	8	8	1	1	1408	1	1593		203	203	203	B9T10_03770.p01						ac8fed72b32d7540cf9a1b9ac12df95a_4315							752b3971131f3206662b5e22da3b23aa_7602				B9T21_10090.p01	B9T15_03930.p01	B9T14_01110.p01		B9T12_04615.p01		B9T13_10030.p01
J7607_00730		hypothetical protein	8	8	1	1	2334	1	1778		500	500	500							ac8fed72b32d7540cf9a1b9ac12df95a_7726		79ccbe49faa72747a800162f6a36c0ca_6884				31e4ba73e5ddb8c85dea419204f0df5a_576	752b3971131f3206662b5e22da3b23aa_7674		03da1bd30b32560bef8e38ea7761d9fe_7499					B9T11_07825.p01		B9T18_01490.p01	B9T13_02835.p01
J7624_09465		hypothetical protein	8	8	1	1	2332	1	1776		194	194	194							ac8fed72b32d7540cf9a1b9ac12df95a_7734		79ccbe49faa72747a800162f6a36c0ca_6877				31e4ba73e5ddb8c85dea419204f0df5a_584	752b3971131f3206662b5e22da3b23aa_7666		03da1bd30b32560bef8e38ea7761d9fe_7507					B9T11_07815.p01		B9T18_01500.p01	B9T13_02825.p01
J7622_01100		hypothetical protein	8	8	1	1	3405	1	339		212	308	296	B9T10_03510.p01	BMY_0019.p01								614e29224da4f337b8899b3142d81070_1795	d977e7edc1a56720a787e465ab4ce472_1808	e653c257947c2dd0a414de7cb159ba14_1795			83683a6c7ca473684645e0830a47223d_873						B9T11_08790.p01			B9T13_03605.p01
J7558_06775		hypothetical protein	8	8	1	1	1815	1	1264		170	824	488			a04b031c37c06570dd644ef46d09ac8c_5391							614e29224da4f337b8899b3142d81070_2083	d977e7edc1a56720a787e465ab4ce472_2096	e653c257947c2dd0a414de7cb159ba14_2083			83683a6c7ca473684645e0830a47223d_585	03da1bd30b32560bef8e38ea7761d9fe_63					B9T11_08575.p01		B9T18_01755.p01
J7620_06335		hypothetical protein	8	8	1	1	73	1	673		956	980	971					102e21fe2bbcace64a7555dd0bcc9007_4956	4a9cac2c1a817d9acdec143b653b9a80_4751	ac8fed72b32d7540cf9a1b9ac12df95a_5505		79ccbe49faa72747a800162f6a36c0ca_4950					752b3971131f3206662b5e22da3b23aa_5031			c648bd7c3a222aa51bed3e3836bcf8c8_3948	B9T21_03495.p01								A6V30_08350.p01
J7620_03575		hypothetical protein	8	8	1	1	843	1	267		251	569	529				2cf5bec40a3ef4476bf46f509f729c16_1485	102e21fe2bbcace64a7555dd0bcc9007_1977	4a9cac2c1a817d9acdec143b653b9a80_6250				614e29224da4f337b8899b3142d81070_3221	d977e7edc1a56720a787e465ab4ce472_4344	e653c257947c2dd0a414de7cb159ba14_4327		752b3971131f3206662b5e22da3b23aa_2841	83683a6c7ca473684645e0830a47223d_3971
J7620_09640		hypothetical protein	8	8	1	1	2163	1	1851		461	476	474	B9T10_03715.p01			2cf5bec40a3ef4476bf46f509f729c16_3903			ac8fed72b32d7540cf9a1b9ac12df95a_4267							752b3971131f3206662b5e22da3b23aa_7650		03da1bd30b32560bef8e38ea7761d9fe_3823		B9T21_10065.p01			B9T11_05005.p01			B9T13_09970.p01
J7620_03305		hypothetical protein	8	8	1	1	1431	1	1868		218	278	240			a04b031c37c06570dd644ef46d09ac8c_3999				ac8fed72b32d7540cf9a1b9ac12df95a_1311						31e4ba73e5ddb8c85dea419204f0df5a_453	752b3971131f3206662b5e22da3b23aa_2624		03da1bd30b32560bef8e38ea7761d9fe_6064					B9T11_07955.p01		B9T18_01360.p01	B9T13_02970.p01
J7558_05685		hypothetical protein	8	8	1	1	518	1	324		248	257	254			a04b031c37c06570dd644ef46d09ac8c_4523	2cf5bec40a3ef4476bf46f509f729c16_7611			ac8fed72b32d7540cf9a1b9ac12df95a_4136							752b3971131f3206662b5e22da3b23aa_7340		03da1bd30b32560bef8e38ea7761d9fe_7686		B9T21_02790.p01				B9T12_04860.p01		B9T13_09855.p01
B143_RS0108995		hypothetical protein	8	8	1	1	696	38	1		830	830	830			a04b031c37c06570dd644ef46d09ac8c_7550				ac8fed72b32d7540cf9a1b9ac12df95a_7432	197b0243bc5bc4c380ecfb8919a026b1_4022	79ccbe49faa72747a800162f6a36c0ca_7104							03da1bd30b32560bef8e38ea7761d9fe_7316	c648bd7c3a222aa51bed3e3836bcf8c8_7064	B9T21_00175.p01								A6V30_01815.p01
J7607_00725		hypothetical protein	8	8	1	1	2335	1	1779		377	377	377							ac8fed72b32d7540cf9a1b9ac12df95a_7722		79ccbe49faa72747a800162f6a36c0ca_6888				31e4ba73e5ddb8c85dea419204f0df5a_572	752b3971131f3206662b5e22da3b23aa_7678		03da1bd30b32560bef8e38ea7761d9fe_7495					B9T11_07830.p01		B9T18_01485.p01	B9T13_02840.p01
J7561_09910		hypothetical protein	7	7	1	1	3241	1	438		782	860	848		BMY_2163.p01		2cf5bec40a3ef4476bf46f509f729c16_7843	102e21fe2bbcace64a7555dd0bcc9007_7820	4a9cac2c1a817d9acdec143b653b9a80_7847		197b0243bc5bc4c380ecfb8919a026b1_7891					31e4ba73e5ddb8c85dea419204f0df5a_7808												F387_01999.p01
J7558_05060		hypothetical protein	7	7	1	1	1491	1	934		575	623	602			a04b031c37c06570dd644ef46d09ac8c_4027				ac8fed72b32d7540cf9a1b9ac12df95a_1335							752b3971131f3206662b5e22da3b23aa_2600		03da1bd30b32560bef8e38ea7761d9fe_6040					B9T11_07990.p01		B9T18_01320.p01	B9T13_03010.p01
J7620_09270		hypothetical protein	7	7	1	1	2406	1	25		3317	3317	3317			a04b031c37c06570dd644ef46d09ac8c_4539				ac8fed72b32d7540cf9a1b9ac12df95a_4152							752b3971131f3206662b5e22da3b23aa_7360				B9T21_02810.p01	B9T15_03710.p01	B9T14_01330.p01	B9T11_04860.p01
B9T15_04380		hypothetical protein	7	7	1	1	662	227	1		410	410	410			a04b031c37c06570dd644ef46d09ac8c_4971													03da1bd30b32560bef8e38ea7761d9fe_4237	c648bd7c3a222aa51bed3e3836bcf8c8_3298		B9T15_04380.p01	B9T14_00660.p01	B9T11_02085.p01			B9T13_00660.p01
F387_01904		hypothetical protein	7	7	1	1	410	1	363		644	644	644		BMY_1805.p01								614e29224da4f337b8899b3142d81070_3551	d977e7edc1a56720a787e465ab4ce472_3226	e653c257947c2dd0a414de7cb159ba14_2607		752b3971131f3206662b5e22da3b23aa_4528	83683a6c7ca473684645e0830a47223d_3536										F387_01904.p01
J7624_00035		hypothetical protein	7	7	1	1	1804	1	1281		170	170	170			a04b031c37c06570dd644ef46d09ac8c_5427							614e29224da4f337b8899b3142d81070_2119	d977e7edc1a56720a787e465ab4ce472_2132	e653c257947c2dd0a414de7cb159ba14_2119			83683a6c7ca473684645e0830a47223d_549	03da1bd30b32560bef8e38ea7761d9fe_27	c648bd7c3a222aa51bed3e3836bcf8c8_2020
BMY_1219		hypothetical protein	7	7	1	1	3080	61	2		2318	13448	9984		BMY_1219.p01		2cf5bec40a3ef4476bf46f509f729c16_6625												03da1bd30b32560bef8e38ea7761d9fe_6660	c648bd7c3a222aa51bed3e3836bcf8c8_6873							B9T13_09740.p01	F387_01224.p01	A6V30_06645.p01
J7547_08175		hypothetical protein	7	7	1	1	3211	1	796		581	581	581				2cf5bec40a3ef4476bf46f509f729c16_7799	102e21fe2bbcace64a7555dd0bcc9007_6496	4a9cac2c1a817d9acdec143b653b9a80_6525	ac8fed72b32d7540cf9a1b9ac12df95a_7823						31e4ba73e5ddb8c85dea419204f0df5a_7829	752b3971131f3206662b5e22da3b23aa_7834											F387_01998.p01
B9T21_02730		hypothetical protein	7	7	1	1	3381	1	919		4253	15911	12042				2cf5bec40a3ef4476bf46f509f729c16_3			ac8fed72b32d7540cf9a1b9ac12df95a_1295											B9T21_02730.p01	B9T15_01835.p01	B9T14_03195.p01	B9T11_00035.p01			B9T13_02755.p01
B9T14_00335		hypothetical protein	7	7	1	1	690	277	1		209	209	209	B9T10_00335.p01	BMY_1946.p01																	B9T15_04705.p01	B9T14_00335.p01	B9T11_02410.p01			B9T13_00335.p01	F387_00902.p01
B9T11_04960		hypothetical protein	7	7	1	1	2372	1	68		473	476	473	B9T10_03670.p01	BMY_0030.p01		2cf5bec40a3ef4476bf46f509f729c16_3977			ac8fed72b32d7540cf9a1b9ac12df95a_4232											B9T21_09890.p01			B9T11_04960.p01	B9T12_04735.p01
J7602_02755		hypothetical protein	7	7	1	1	1780	1	1307		149	149	149			a04b031c37c06570dd644ef46d09ac8c_5479							614e29224da4f337b8899b3142d81070_2179	d977e7edc1a56720a787e465ab4ce472_2192	e653c257947c2dd0a414de7cb159ba14_2179			83683a6c7ca473684645e0830a47223d_489	03da1bd30b32560bef8e38ea7761d9fe_7646	c648bd7c3a222aa51bed3e3836bcf8c8_1976
J7622_06805		hypothetical protein	7	7	1	1	3760	1	598		308	1013	606									79ccbe49faa72747a800162f6a36c0ca_5058	614e29224da4f337b8899b3142d81070_4611	d977e7edc1a56720a787e465ab4ce472_5090	e653c257947c2dd0a414de7cb159ba14_4711		752b3971131f3206662b5e22da3b23aa_5123	83683a6c7ca473684645e0830a47223d_5401											A6V30_08530.p01
B9T14_01225		hypothetical protein	7	7	1	1	2317	1	65		341	341	341	B9T10_03675.p01		a04b031c37c06570dd644ef46d09ac8c_4623											752b3971131f3206662b5e22da3b23aa_7452				B9T21_09895.p01	B9T15_03815.p01	B9T14_01225.p01		B9T12_04730.p01
J7554_08735		hypothetical protein	6	6	1	1	2352	1	1799		254	254	254			a04b031c37c06570dd644ef46d09ac8c_7917						79ccbe49faa72747a800162f6a36c0ca_6939				31e4ba73e5ddb8c85dea419204f0df5a_524								B9T11_07890.p01		B9T18_01425.p01	B9T13_02905.p01
B9T15_03955		hypothetical protein	6	6	1	1	1512	1	1587		299	449	349		BMY_2107.p01		2cf5bec40a3ef4476bf46f509f729c16_3843			ac8fed72b32d7540cf9a1b9ac12df95a_4834									03da1bd30b32560bef8e38ea7761d9fe_3895			B9T15_03955.p01	B9T14_01085.p01
J7558_05695		hypothetical protein	6	6	1	1	2404	1	211		671	671	671			a04b031c37c06570dd644ef46d09ac8c_4531				ac8fed72b32d7540cf9a1b9ac12df95a_4144											B9T21_02800.p01	B9T15_03700.p01	B9T14_01340.p01	B9T11_04850.p01
B9T15_03705		hypothetical protein	6	6	1	1	2405	1	24		305	305	305			a04b031c37c06570dd644ef46d09ac8c_4535				ac8fed72b32d7540cf9a1b9ac12df95a_4148											B9T21_02805.p01	B9T15_03705.p01	B9T14_01335.p01	B9T11_04855.p01
J7560_09970		hypothetical protein	6	6	1	1	480	1	885	Hypothetical protein with no hits to refseq/uniprot/clusters/cdd/tigrfams/pfam overlapping another protein with hits	227	416	384				2cf5bec40a3ef4476bf46f509f729c16_7879	102e21fe2bbcace64a7555dd0bcc9007_7197	4a9cac2c1a817d9acdec143b653b9a80_7753							31e4ba73e5ddb8c85dea419204f0df5a_7578								B9T11_10250.p01			B9T13_05825.p01
J7552_09800		hypothetical protein	6	6	1	1	2962	1	449		245	245	245					102e21fe2bbcace64a7555dd0bcc9007_7874	4a9cac2c1a817d9acdec143b653b9a80_7886		197b0243bc5bc4c380ecfb8919a026b1_7763						752b3971131f3206662b5e22da3b23aa_7757										B9T13_10225.p01		A6V30_10090.p01
B9T13_03560		hypothetical protein	6	6	1	1	2500	1	974		2051	2051	2051	B9T10_03465.p01																		B9T15_01275.p01	B9T14_03755.p01	B9T11_08540.p01		B9T18_01800.p01	B9T13_03560.p01
B9T21_02840		hypothetical protein	6	6	1	1	2395	1	36		578	578	578	B9T10_03600.p01		a04b031c37c06570dd644ef46d09ac8c_4563				ac8fed72b32d7540cf9a1b9ac12df95a_4176											B9T21_02840.p01	B9T15_03740.p01	B9T14_01300.p01
J7606_02590		hypothetical protein	6	6	1	1	2462	1	121		629	629	629	B9T10_03805.p01									614e29224da4f337b8899b3142d81070_2059	d977e7edc1a56720a787e465ab4ce472_2072	e653c257947c2dd0a414de7cb159ba14_2059			83683a6c7ca473684645e0830a47223d_609							B9T12_04580.p01
B9T10_07940		hypothetical protein	6	6	1	1	805	1	316		290	290	290	B9T10_07940.p01				102e21fe2bbcace64a7555dd0bcc9007_2049	4a9cac2c1a817d9acdec143b653b9a80_6179							31e4ba73e5ddb8c85dea419204f0df5a_3184			03da1bd30b32560bef8e38ea7761d9fe_2049							B9T18_07775.p01
B9T18_07780		hypothetical protein	6	6	1	1	806	1	315		524	524	524	B9T10_07945.p01				102e21fe2bbcace64a7555dd0bcc9007_2053	4a9cac2c1a817d9acdec143b653b9a80_6175							31e4ba73e5ddb8c85dea419204f0df5a_3180			03da1bd30b32560bef8e38ea7761d9fe_2053							B9T18_07780.p01
J7560_06040		hypothetical protein	6	6	1	1	2506	1	977		743	743	743			a04b031c37c06570dd644ef46d09ac8c_4475	2cf5bec40a3ef4476bf46f509f729c16_4788				197b0243bc5bc4c380ecfb8919a026b1_5931	79ccbe49faa72747a800162f6a36c0ca_7720							03da1bd30b32560bef8e38ea7761d9fe_99										A6V30_04940.p01
J7602_02500		hypothetical protein	6	6	1	1	2196	1	1846		701	701	701			a04b031c37c06570dd644ef46d09ac8c_5276							614e29224da4f337b8899b3142d81070_1975	d977e7edc1a56720a787e465ab4ce472_1988	e653c257947c2dd0a414de7cb159ba14_1975			83683a6c7ca473684645e0830a47223d_693			B9T21_09835.p01
J7606_02495		hypothetical protein	6	6	1	1	2194	1	1844		464	464	464			a04b031c37c06570dd644ef46d09ac8c_5284							614e29224da4f337b8899b3142d81070_1983	d977e7edc1a56720a787e465ab4ce472_1996	e653c257947c2dd0a414de7cb159ba14_1983			83683a6c7ca473684645e0830a47223d_685			B9T21_09825.p01
J7606_02635		hypothetical protein	6	6	1	1	1819	1	1256		188	188	188			a04b031c37c06570dd644ef46d09ac8c_5403							614e29224da4f337b8899b3142d81070_2095	d977e7edc1a56720a787e465ab4ce472_2108	e653c257947c2dd0a414de7cb159ba14_2095			83683a6c7ca473684645e0830a47223d_573	03da1bd30b32560bef8e38ea7761d9fe_51
J7606_07210		hypothetical protein	6	6	1	1	1338	22	1		557	557	557					102e21fe2bbcace64a7555dd0bcc9007_4020	4a9cac2c1a817d9acdec143b653b9a80_2016				614e29224da4f337b8899b3142d81070_5616	d977e7edc1a56720a787e465ab4ce472_5738	e653c257947c2dd0a414de7cb159ba14_5722			83683a6c7ca473684645e0830a47223d_5808
A6V30_10025		hypothetical protein	6	6	1	1	2053	1	848		359	359	359					102e21fe2bbcace64a7555dd0bcc9007_7838	4a9cac2c1a817d9acdec143b653b9a80_7827							31e4ba73e5ddb8c85dea419204f0df5a_7894											B9T13_10360.p01	F387_02006.p01	A6V30_10025.p01
B9T15_04215		hypothetical protein	6	6	1	1	1339	22	2		1337	1337	1337							ac8fed72b32d7540cf9a1b9ac12df95a_5043		79ccbe49faa72747a800162f6a36c0ca_5457										B9T15_04215.p01	B9T14_00825.p01	B9T11_01920.p01			B9T13_00825.p01
J7554_08630		hypothetical protein	6	6	1	1	2426	1	1763		335	335	335							ac8fed72b32d7540cf9a1b9ac12df95a_7757		79ccbe49faa72747a800162f6a36c0ca_6857							03da1bd30b32560bef8e38ea7761d9fe_7531					B9T11_07790.p01		B9T18_01525.p01	B9T13_02805.p01
J7624_09510		hypothetical protein	6	6	1	1	2429	1	1751		716	716	716							ac8fed72b32d7540cf9a1b9ac12df95a_7769		79ccbe49faa72747a800162f6a36c0ca_6845							03da1bd30b32560bef8e38ea7761d9fe_7543					B9T11_07775.p01		B9T18_01540.p01	B9T13_02790.p01
F387_02010		hypothetical protein	6	6	1	1	3256	1	737		311	311	311									79ccbe49faa72747a800162f6a36c0ca_7527										B9T15_10050.p01	B9T14_10020.p01				B9T13_10380.p01	F387_02010.p01	A6V30_10110.p01
B9T12_04815		hypothetical protein	6	6	1	1	2391	1	31		179	179	179										614e29224da4f337b8899b3142d81070_1867	d977e7edc1a56720a787e465ab4ce472_1880	e653c257947c2dd0a414de7cb159ba14_1867		752b3971131f3206662b5e22da3b23aa_7384	83683a6c7ca473684645e0830a47223d_801							B9T12_04815.p01
B9T12_04810		hypothetical protein	6	6	1	1	2390	1	32		335	335	335										614e29224da4f337b8899b3142d81070_1871	d977e7edc1a56720a787e465ab4ce472_1884	e653c257947c2dd0a414de7cb159ba14_1871		752b3971131f3206662b5e22da3b23aa_7388	83683a6c7ca473684645e0830a47223d_797							B9T12_04810.p01
B9T12_04805		hypothetical protein	6	6	1	1	2389	1	33		524	524	524										614e29224da4f337b8899b3142d81070_1875	d977e7edc1a56720a787e465ab4ce472_1888	e653c257947c2dd0a414de7cb159ba14_1875		752b3971131f3206662b5e22da3b23aa_7392	83683a6c7ca473684645e0830a47223d_793							B9T12_04805.p01
J7622_04455		hypothetical protein	6	6	1	1	411	1	364		218	218	218										614e29224da4f337b8899b3142d81070_3547	d977e7edc1a56720a787e465ab4ce472_3230	e653c257947c2dd0a414de7cb159ba14_2603		752b3971131f3206662b5e22da3b23aa_4532	83683a6c7ca473684645e0830a47223d_3540										F387_01903.p01
B9T12_03760		hypothetical protein	6	6	1	1	2774	4	2		158	215	205	B9T10_04665.p01	BMY_0766.p01																				B9T12_03760.p01	B9T18_00445.p01		F387_01627.p01	A6V30_05490.p01
B143_RS0109285		hypothetical protein	6	6	1	1	406	1	360		893	10364	4514									79ccbe49faa72747a800162f6a36c0ca_7231							03da1bd30b32560bef8e38ea7761d9fe_7242	c648bd7c3a222aa51bed3e3836bcf8c8_7285	B9T21_09315.p01				B9T12_09650.p01	B9T18_05440.p01
B9T10_07930		hypothetical protein	6	6	1	1	803	1	318		1790	1790	1790	B9T10_07930.p01				102e21fe2bbcace64a7555dd0bcc9007_2037	4a9cac2c1a817d9acdec143b653b9a80_6191							31e4ba73e5ddb8c85dea419204f0df5a_3196			03da1bd30b32560bef8e38ea7761d9fe_2037							B9T18_07765.p01
BMY_0032		hypothetical protein	6	6	1	1	2320	1	1827		61	221	184		BMY_0032.p01					ac8fed72b32d7540cf9a1b9ac12df95a_7920									03da1bd30b32560bef8e38ea7761d9fe_8048		B9T21_09905.p01	B9T15_03825.p01	B9T14_01215.p01
B9T11_07895		hypothetical protein	6	6	1	1	2353	1	1798		221	221	221			a04b031c37c06570dd644ef46d09ac8c_7921										31e4ba73e5ddb8c85dea419204f0df5a_520	752b3971131f3206662b5e22da3b23aa_7929							B9T11_07895.p01		B9T18_01420.p01	B9T13_02910.p01
J7560_06045		hypothetical protein	6	6	1	1	2505	1	976		698	773	742			a04b031c37c06570dd644ef46d09ac8c_4471	2cf5bec40a3ef4476bf46f509f729c16_4792				197b0243bc5bc4c380ecfb8919a026b1_5927	79ccbe49faa72747a800162f6a36c0ca_7716							03da1bd30b32560bef8e38ea7761d9fe_103										A6V30_04935.p01
B9T14_09925		hypothetical protein	6	6	1	1	3260	1	537		470	1043	666				2cf5bec40a3ef4476bf46f509f729c16_7701				197b0243bc5bc4c380ecfb8919a026b1_7840	79ccbe49faa72747a800162f6a36c0ca_7541									B9T21_09705.p01	B9T15_09955.p01	B9T14_09925.p01
J7558_05730		hypothetical protein	6	6	1	1	2396	1	35		320	332	328	B9T10_03595.p01		a04b031c37c06570dd644ef46d09ac8c_4559				ac8fed72b32d7540cf9a1b9ac12df95a_4172											B9T21_02835.p01	B9T15_03735.p01	B9T14_01305.p01
B9T15_03745		hypothetical protein	6	6	1	1	2394	1	37		2930	2948	2933	B9T10_03605.p01		a04b031c37c06570dd644ef46d09ac8c_4567				ac8fed72b32d7540cf9a1b9ac12df95a_4180											B9T21_02845.p01	B9T15_03745.p01	B9T14_01295.p01
B9T10_08635		hypothetical protein	5	5	1	1	990	306	1		143	227	210	B9T10_08635.p01	BMY_1006.p01																					B9T18_08475.p01		F387_00477.p01	A6V30_00965.p01
B9T13_03015		hypothetical protein	5	5	1	1	1484	1	935		323	323	323			a04b031c37c06570dd644ef46d09ac8c_4031				ac8fed72b32d7540cf9a1b9ac12df95a_4347											B9T21_09310.p01			B9T11_07995.p01			B9T13_03015.p01
B9T21_02735		hypothetical protein	5	5	1	1	3384	1	917		356	1223	1049			a04b031c37c06570dd644ef46d09ac8c_7873				ac8fed72b32d7540cf9a1b9ac12df95a_4093											B9T21_02735.p01			B9T11_00015.p01			B9T13_02760.p01
J7547_07050		hypothetical protein	5	5	1	1	2649	54	2		191	191	191					102e21fe2bbcace64a7555dd0bcc9007_5609	4a9cac2c1a817d9acdec143b653b9a80_5645			79ccbe49faa72747a800162f6a36c0ca_2252									B9T21_07305.p01								A6V30_05350.p01
J7622_01050		hypothetical protein	5	5	1	1	527	1	208		767	767	767	B9T10_03560.p01									614e29224da4f337b8899b3142d81070_1835	d977e7edc1a56720a787e465ab4ce472_1848	e653c257947c2dd0a414de7cb159ba14_1835			83683a6c7ca473684645e0830a47223d_833
J7600_02315		hypothetical protein	5	5	1	1	526	1	22		290	290	290	B9T10_03565.p01									614e29224da4f337b8899b3142d81070_1839	d977e7edc1a56720a787e465ab4ce472_1852	e653c257947c2dd0a414de7cb159ba14_1839			83683a6c7ca473684645e0830a47223d_829
J7624_04860		hypothetical protein	5	5	1	1	1416	1	1629		200	203	201			a04b031c37c06570dd644ef46d09ac8c_5332	2cf5bec40a3ef4476bf46f509f729c16_3871												03da1bd30b32560bef8e38ea7761d9fe_3867		B9T21_09940.p01			B9T11_05060.p01
J7558_06685		hypothetical protein	5	5	1	1	1478	1	1633		644	644	644		BMY_0003.p01	a04b031c37c06570dd644ef46d09ac8c_5320													03da1bd30b32560bef8e38ea7761d9fe_3859		B9T21_09955.p01			B9T11_05050.p01
J7624_00225		hypothetical protein	5	5	1	1	3269	1	941		164	164	164		BMY_0551.p01	a04b031c37c06570dd644ef46d09ac8c_4395					197b0243bc5bc4c380ecfb8919a026b1_5812	79ccbe49faa72747a800162f6a36c0ca_67							03da1bd30b32560bef8e38ea7761d9fe_179
J7606_02670		hypothetical protein	5	5	1	1	1798	1	1280		500	500	500			a04b031c37c06570dd644ef46d09ac8c_5431							614e29224da4f337b8899b3142d81070_2123	d977e7edc1a56720a787e465ab4ce472_2136	e653c257947c2dd0a414de7cb159ba14_2123			83683a6c7ca473684645e0830a47223d_545
J7560_05345		hypothetical protein	5	5	1	1	240	49	1		503	503	503				2cf5bec40a3ef4476bf46f509f729c16_4244	102e21fe2bbcace64a7555dd0bcc9007_4713	4a9cac2c1a817d9acdec143b653b9a80_4994											c648bd7c3a222aa51bed3e3836bcf8c8_3705								F387_01391.p01
J7560_05640		hypothetical protein	5	5	1	1	303	1	616		1238	1238	1238				2cf5bec40a3ef4476bf46f509f729c16_4477												03da1bd30b32560bef8e38ea7761d9fe_4778			B9T15_05640.p01	B9T14_05625.p01	B9T11_04240.p01
B9T14_05630		hypothetical protein	5	5	1	1	302	1	615		1079	1079	1079				2cf5bec40a3ef4476bf46f509f729c16_4481												03da1bd30b32560bef8e38ea7761d9fe_4774			B9T15_05645.p01	B9T14_05630.p01	B9T11_04235.p01
J7558_09990		hypothetical protein	5	5	1	1	2354	1	1797		308	791	694			a04b031c37c06570dd644ef46d09ac8c_7925										31e4ba73e5ddb8c85dea419204f0df5a_516								B9T11_07900.p01		B9T18_01415.p01	B9T13_02915.p01
J7620_03270		hypothetical protein	5	5	1	1	1494	1	92		224	224	224							ac8fed72b32d7540cf9a1b9ac12df95a_1339							752b3971131f3206662b5e22da3b23aa_2596		03da1bd30b32560bef8e38ea7761d9fe_6036		B9T21_06600.p01			B9T11_05095.p01
J7602_02560		hypothetical protein	5	5	1	1	1403	1	1915		194	194	194										614e29224da4f337b8899b3142d81070_2023	d977e7edc1a56720a787e465ab4ce472_2036	e653c257947c2dd0a414de7cb159ba14_2023			83683a6c7ca473684645e0830a47223d_645									B9T13_10020.p01
J7602_02565		hypothetical protein	5	5	1	1	1404	1	1589		821	821	821										614e29224da4f337b8899b3142d81070_2027	d977e7edc1a56720a787e465ab4ce472_2040	e653c257947c2dd0a414de7cb159ba14_2027			83683a6c7ca473684645e0830a47223d_641									B9T13_10025.p01
J7622_00800		hypothetical protein	5	5	1	1	1395	1	1636		173	173	173										614e29224da4f337b8899b3142d81070_2035	d977e7edc1a56720a787e465ab4ce472_2048	e653c257947c2dd0a414de7cb159ba14_2035		752b3971131f3206662b5e22da3b23aa_7594	83683a6c7ca473684645e0830a47223d_633
J7602_05410		hypothetical protein	5	5	1	1	851	1	303		299	299	299										614e29224da4f337b8899b3142d81070_3169	d977e7edc1a56720a787e465ab4ce472_4292	e653c257947c2dd0a414de7cb159ba14_4275			83683a6c7ca473684645e0830a47223d_4023						B9T11_07705.p01
J7600_04010		hypothetical protein	5	5	1	1	800	1	306		1781	1781	1781										614e29224da4f337b8899b3142d81070_3181	d977e7edc1a56720a787e465ab4ce472_4304	e653c257947c2dd0a414de7cb159ba14_4287			83683a6c7ca473684645e0830a47223d_4011						B9T11_07715.p01
B9T12_04695		hypothetical protein	5	5	1	1	2356	1	1796		131	131	131													31e4ba73e5ddb8c85dea419204f0df5a_512								B9T11_07905.p01	B9T12_04695.p01	B9T18_01410.p01	B9T13_02920.p01
B9T14_01345		hypothetical protein	5	5	1	1	517	1	212		1070	1079	1075			a04b031c37c06570dd644ef46d09ac8c_4527				ac8fed72b32d7540cf9a1b9ac12df95a_4140											B9T21_02795.p01	B9T15_03695.p01	B9T14_01345.p01
B9T18_01705		hypothetical protein	5	5	1	1	1800	1	1285		230	242	237	B9T10_02220.p01		a04b031c37c06570dd644ef46d09ac8c_5439													03da1bd30b32560bef8e38ea7761d9fe_19					B9T11_08625.p01		B9T18_01705.p01
J7553_09815		hypothetical protein	5	5	1	1	2433	1	1750		3317	3788	3430							ac8fed72b32d7540cf9a1b9ac12df95a_7773		79ccbe49faa72747a800162f6a36c0ca_6841												B9T11_07770.p01		B9T18_01545.p01	B9T13_02785.p01
F387_01464		hypothetical protein	5	5	1	1	341	18	1		1628	1628	1628	B9T10_05840.p01		a04b031c37c06570dd644ef46d09ac8c_3426				ac8fed72b32d7540cf9a1b9ac12df95a_6845															B9T12_06560.p01			F387_01464.p01
B9T13_02925		hypothetical protein	5	5	1	1	2355	1	1899		494	494	494									79ccbe49faa72747a800162f6a36c0ca_6951									B9T21_09965.p01			B9T11_07910.p01		B9T18_01405.p01	B9T13_02925.p01
B9T14_01190		hypothetical protein	5	5	1	1	1439	1	1808	Hypothetical protein with no hits to refseq/uniprot/clusters/cdd/tigrfams/pfam overlapping another protein with hits	197	494	434			a04b031c37c06570dd644ef46d09ac8c_8035				ac8fed72b32d7540cf9a1b9ac12df95a_7901											B9T21_09925.p01	B9T15_03850.p01	B9T14_01190.p01
B9T11_04245		hypothetical protein	5	5	1	1	304	1	617		1040	1136	1091				2cf5bec40a3ef4476bf46f509f729c16_4473												03da1bd30b32560bef8e38ea7761d9fe_4782			B9T15_05635.p01	B9T14_05620.p01	B9T11_04245.p01
A6V30_10065		hypothetical protein	5	5	1	1	2937	1	516		245	467	422				2cf5bec40a3ef4476bf46f509f729c16_7737			ac8fed72b32d7540cf9a1b9ac12df95a_7853	197b0243bc5bc4c380ecfb8919a026b1_7798										B9T21_09760.p01								A6V30_10065.p01
B9T15_09995		hypothetical protein	5	5	1	1	2066	1	856		335	356	347				2cf5bec40a3ef4476bf46f509f729c16_7745			ac8fed72b32d7540cf9a1b9ac12df95a_7845												B9T15_09995.p01	B9T14_09965.p01			B9T18_09980.p01
J7554_04130		hypothetical protein	5	5	1	1	717	241	1		716	722	717					102e21fe2bbcace64a7555dd0bcc9007_2582	4a9cac2c1a817d9acdec143b653b9a80_2953			79ccbe49faa72747a800162f6a36c0ca_3278					752b3971131f3206662b5e22da3b23aa_3390									B9T18_08445.p01
J7560_04930		hypothetical protein	4	4	1	1	2189	1	1897		173	173	173		BMY_0039.p01		2cf5bec40a3ef4476bf46f509f729c16_3917					79ccbe49faa72747a800162f6a36c0ca_6959				31e4ba73e5ddb8c85dea419204f0df5a_484
A6V30_00240		hypothetical protein	4	4	1	1	827	1	274		278	461	415		BMY_1155.p01						197b0243bc5bc4c380ecfb8919a026b1_2174																	F387_01818.p01	A6V30_00240.p01
J7558_09130		hypothetical protein	4	4	1	1	3438	1	393		881	965	902			a04b031c37c06570dd644ef46d09ac8c_7249					197b0243bc5bc4c380ecfb8919a026b1_7285								03da1bd30b32560bef8e38ea7761d9fe_7236						B9T12_09635.p01
B9T21_06905		hypothetical protein	4	4	1	1	2598	1	700		524	527	525							ac8fed72b32d7540cf9a1b9ac12df95a_1563							752b3971131f3206662b5e22da3b23aa_2372			c648bd7c3a222aa51bed3e3836bcf8c8_779	B9T21_06905.p01
J7552_07210		hypothetical protein	4	4	1	1	1948	1	938	Hypothetical protein with no hits to refseq/uniprot/clusters/cdd/tigrfams/pfam overlapping another protein with hits	188	188	188								197b0243bc5bc4c380ecfb8919a026b1_5732														B9T12_03090.p01	B9T18_02000.p01			A6V30_04700.p01
B9T11_08620		hypothetical protein	4	4	1	1	1803	1	1284		650	698	686																03da1bd30b32560bef8e38ea7761d9fe_23	c648bd7c3a222aa51bed3e3836bcf8c8_2016				B9T11_08620.p01		B9T18_01710.p01
B9T15_02355		hypothetical protein	4	4	1	1	599	1	1334		1190	1190	1190	B9T10_02365.p01																c648bd7c3a222aa51bed3e3836bcf8c8_1896		B9T15_02355.p01	B9T14_02680.p01
J7560_09670		hypothetical protein	4	4	1	1	3432	1	905		605	605	605	B9T10_07330.p01			2cf5bec40a3ef4476bf46f509f729c16_7649															B9T15_07155.p01	B9T14_07125.p01
J7607_04120		hypothetical protein	4	4	1	1	750	1	237		1424	1424	1424	B9T10_07820.p01												31e4ba73e5ddb8c85dea419204f0df5a_3264									B9T12_05060.p01				A6V30_00185.p01
B9T12_05065		hypothetical protein	4	4	1	1	749	1	238		854	854	854	B9T10_07825.p01												31e4ba73e5ddb8c85dea419204f0df5a_3260									B9T12_05065.p01				A6V30_00190.p01
J7553_01665		hypothetical protein	4	4	1	1	1488	1	930		911	911	911			a04b031c37c06570dd644ef46d09ac8c_4011				ac8fed72b32d7540cf9a1b9ac12df95a_1323							752b3971131f3206662b5e22da3b23aa_2612							B9T11_07970.p01
B9T13_02995		hypothetical protein	4	4	1	1	1487	1	931		185	185	185			a04b031c37c06570dd644ef46d09ac8c_4015																		B9T11_07975.p01		B9T18_01335.p01	B9T13_02995.p01
B9T18_10065		hypothetical protein	4	4	1	1	2089	1	502		221	221	221			a04b031c37c06570dd644ef46d09ac8c_7929																				B9T18_10065.p01	B9T13_10325.p01	F387_01968.p01
J7560_06665		hypothetical protein	4	4	1	1	2633	6	6		494	494	494				2cf5bec40a3ef4476bf46f509f729c16_5281	102e21fe2bbcace64a7555dd0bcc9007_5757	4a9cac2c1a817d9acdec143b653b9a80_5809																			F387_01760.p01
J7561_07300		hypothetical protein	4	4	1	1	2632	6	7		980	980	980				2cf5bec40a3ef4476bf46f509f729c16_5285	102e21fe2bbcace64a7555dd0bcc9007_5761	4a9cac2c1a817d9acdec143b653b9a80_5813																			F387_01759.p01
J7547_07245		hypothetical protein	4	4	1	1	2631	6	27		1025	1025	1025				2cf5bec40a3ef4476bf46f509f729c16_5289	102e21fe2bbcace64a7555dd0bcc9007_5765	4a9cac2c1a817d9acdec143b653b9a80_5817																			F387_01758.p01
J7624_02560		hypothetical protein	4	4	1	1	797	1	314		170	170	170					102e21fe2bbcace64a7555dd0bcc9007_2041	4a9cac2c1a817d9acdec143b653b9a80_6187							31e4ba73e5ddb8c85dea419204f0df5a_3192			03da1bd30b32560bef8e38ea7761d9fe_2041
J7554_09455		hypothetical protein	4	4	1	1	2046	1	844		221	221	221					102e21fe2bbcace64a7555dd0bcc9007_7918	4a9cac2c1a817d9acdec143b653b9a80_7932			79ccbe49faa72747a800162f6a36c0ca_7497																	A6V30_10045.p01
B9T15_10065		hypothetical protein	4	4	1	1	3250	1	732		317	317	317								197b0243bc5bc4c380ecfb8919a026b1_7926						752b3971131f3206662b5e22da3b23aa_7881					B9T15_10065.p01	B9T14_10035.p01
J7606_02215		hypothetical protein	4	4	1	1	2502	1	978		719	719	719										614e29224da4f337b8899b3142d81070_1759	d977e7edc1a56720a787e465ab4ce472_1772	e653c257947c2dd0a414de7cb159ba14_1759			83683a6c7ca473684645e0830a47223d_909
J7602_02480		hypothetical protein	4	4	1	1	2193	1	1849		536	536	536										614e29224da4f337b8899b3142d81070_1959	d977e7edc1a56720a787e465ab4ce472_1972	e653c257947c2dd0a414de7cb159ba14_1959			83683a6c7ca473684645e0830a47223d_709
J7622_00750		hypothetical protein	4	4	1	1	1813	1	967		875	875	875										614e29224da4f337b8899b3142d81070_2075	d977e7edc1a56720a787e465ab4ce472_2088	e653c257947c2dd0a414de7cb159ba14_2075			83683a6c7ca473684645e0830a47223d_593
J7600_02680		hypothetical protein	4	4	1	1	1763	1	1278		686	686	686										614e29224da4f337b8899b3142d81070_2131	d977e7edc1a56720a787e465ab4ce472_2144	e653c257947c2dd0a414de7cb159ba14_2131			83683a6c7ca473684645e0830a47223d_537
J7622_00675		hypothetical protein	4	4	1	1	1764	1	1277		233	233	233										614e29224da4f337b8899b3142d81070_2135	d977e7edc1a56720a787e465ab4ce472_2148	e653c257947c2dd0a414de7cb159ba14_2135			83683a6c7ca473684645e0830a47223d_533
J7622_00670		hypothetical protein	4	4	1	1	1765	1	1276		869	869	869										614e29224da4f337b8899b3142d81070_2139	d977e7edc1a56720a787e465ab4ce472_2152	e653c257947c2dd0a414de7cb159ba14_2139			83683a6c7ca473684645e0830a47223d_529
J7606_02695		hypothetical protein	4	4	1	1	1766	1	1247		215	215	215										614e29224da4f337b8899b3142d81070_2143	d977e7edc1a56720a787e465ab4ce472_2156	e653c257947c2dd0a414de7cb159ba14_2143			83683a6c7ca473684645e0830a47223d_525
J7606_02700		hypothetical protein	4	4	1	1	1767	1	1248		329	329	329										614e29224da4f337b8899b3142d81070_2147	d977e7edc1a56720a787e465ab4ce472_2160	e653c257947c2dd0a414de7cb159ba14_2147			83683a6c7ca473684645e0830a47223d_521
J7606_02705		hypothetical protein	4	4	1	1	1768	1	1249		704	704	704										614e29224da4f337b8899b3142d81070_2151	d977e7edc1a56720a787e465ab4ce472_2164	e653c257947c2dd0a414de7cb159ba14_2151			83683a6c7ca473684645e0830a47223d_517
J7622_00615		hypothetical protein	4	4	1	1	1779	1	1243		551	551	551										614e29224da4f337b8899b3142d81070_2183	d977e7edc1a56720a787e465ab4ce472_2196	e653c257947c2dd0a414de7cb159ba14_2183			83683a6c7ca473684645e0830a47223d_485
J7622_05055		hypothetical protein	4	4	1	1	798	1	305		164	164	164										614e29224da4f337b8899b3142d81070_3177	d977e7edc1a56720a787e465ab4ce472_4300	e653c257947c2dd0a414de7cb159ba14_4283			83683a6c7ca473684645e0830a47223d_4015
J7606_05935		hypothetical protein	4	4	1	1	11	1	597		221	221	221										614e29224da4f337b8899b3142d81070_4607	d977e7edc1a56720a787e465ab4ce472_5094	e653c257947c2dd0a414de7cb159ba14_4707			83683a6c7ca473684645e0830a47223d_5405
J7606_07820		hypothetical protein	4	4	1	1	2779	4	3		2465	2465	2465										614e29224da4f337b8899b3142d81070_6098	d977e7edc1a56720a787e465ab4ce472_6221	e653c257947c2dd0a414de7cb159ba14_6207			83683a6c7ca473684645e0830a47223d_6465
J7622_08920		hypothetical protein	4	4	1	1	3198	37	1		1073	1073	1073										614e29224da4f337b8899b3142d81070_6560	d977e7edc1a56720a787e465ab4ce472_6638	e653c257947c2dd0a414de7cb159ba14_6626			83683a6c7ca473684645e0830a47223d_7083
J7600_08265		hypothetical protein	4	4	1	1	3197	37	2		233	233	233										614e29224da4f337b8899b3142d81070_6564	d977e7edc1a56720a787e465ab4ce472_6634	e653c257947c2dd0a414de7cb159ba14_6622			83683a6c7ca473684645e0830a47223d_7087
J7622_08965		hypothetical protein	4	4	1	1	3189	37	4		803	803	803										614e29224da4f337b8899b3142d81070_6596	d977e7edc1a56720a787e465ab4ce472_6603	e653c257947c2dd0a414de7cb159ba14_6590			83683a6c7ca473684645e0830a47223d_7118
B9T11_08555		hypothetical protein	4	4	1	1	2478	1	980		1172	1172	1172																			B9T15_01255.p01	B9T14_03775.p01	B9T11_08555.p01			B9T13_03575.p01
B9T11_08530		hypothetical protein	4	4	1	1	2498	1	972		650	650	650																			B9T15_01285.p01	B9T14_03745.p01	B9T11_08530.p01			B9T13_03550.p01
B9T11_08525		hypothetical protein	4	4	1	1	2497	1	971		1718	1718	1718																			B9T15_01290.p01	B9T14_03740.p01	B9T11_08525.p01			B9T13_03545.p01
J7606_02615		hypothetical protein	4	4	1	1	1814	1	966		566	566	566										614e29224da4f337b8899b3142d81070_2079	d977e7edc1a56720a787e465ab4ce472_2092	e653c257947c2dd0a414de7cb159ba14_2079			83683a6c7ca473684645e0830a47223d_589
B9T15_09930		hypothetical protein	4	4	1	1	3244	1	865		527	686	586		BMY_2161.p01																	B9T15_09930.p01	B9T14_09900.p01						A6V30_10375.p01
J7620_03580		hypothetical protein	4	4	1	1	846	1	259		293	590	515														752b3971131f3206662b5e22da3b23aa_2845					B9T15_07710.p01	B9T14_07680.p01				B9T13_06375.p01
J7560_09655		hypothetical protein	4	4	1	1	3430	1	886	Hypothetical protein with no hits to refseq/uniprot/clusters/cdd/tigrfams/pfam overlapping another protein with hits	3898	5102	4455				2cf5bec40a3ef4476bf46f509f729c16_7639	102e21fe2bbcace64a7555dd0bcc9007_7842	4a9cac2c1a817d9acdec143b653b9a80_7898												B9T21_09855.p01
B9T11_04220		hypothetical protein	4	4	1	1	91	1	613		560	1124	983				2cf5bec40a3ef4476bf46f509f729c16_4489												03da1bd30b32560bef8e38ea7761d9fe_4766			B9T15_05655.p01		B9T11_04220.p01
J7553_09835		hypothetical protein	4	4	1	1	2441	1	1742		194	353	313							ac8fed72b32d7540cf9a1b9ac12df95a_7789							752b3971131f3206662b5e22da3b23aa_7344		03da1bd30b32560bef8e38ea7761d9fe_7563							B9T18_01565.p01
J7607_00605		hypothetical protein	4	4	1	1	2156	1	1904		737	764	750													31e4ba73e5ddb8c85dea419204f0df5a_477			03da1bd30b32560bef8e38ea7761d9fe_6087						B9T12_04675.p01		B9T13_02940.p01
J7560_04215		hypothetical protein	4	4	1	1	1260	5	4		329	332	329	B9T10_00455.p01			2cf5bec40a3ef4476bf46f509f729c16_3346												03da1bd30b32560bef8e38ea7761d9fe_4394	c648bd7c3a222aa51bed3e3836bcf8c8_3455
J7554_00015		hypothetical protein	4	4	1	1	1969	1	948		590	710	680	B9T10_03455.p01						ac8fed72b32d7540cf9a1b9ac12df95a_4790		79ccbe49faa72747a800162f6a36c0ca_11														B9T18_01810.p01
B143_RS0100730		hypothetical protein	3	3	1	1	2642	29	5		1215	5660	3902																	c648bd7c3a222aa51bed3e3836bcf8c8_577								F387_02018.p01	A6V30_05215.p01
B9T12_06490		hypothetical protein	3	3	1	1	34	1	571		974	974	974	B9T10_05775.p01																					B9T12_06490.p01		B9T13_04265.p01
B9T13_04270		hypothetical protein	3	3	1	1	35	1	570		1226	1226	1226	B9T10_05780.p01																					B9T12_06495.p01		B9T13_04270.p01
J7558_06710		hypothetical protein	3	3	1	1	1479	1	1635		146	146	146		BMY_0004.p01	a04b031c37c06570dd644ef46d09ac8c_5340				ac8fed72b32d7540cf9a1b9ac12df95a_4323
J7560_04860		hypothetical protein	3	3	1	1	1471	1	1624		146	146	146		BMY_0048.p01		2cf5bec40a3ef4476bf46f509f729c16_3863												03da1bd30b32560bef8e38ea7761d9fe_3875
J7561_00070		hypothetical protein	3	3	1	1	1955	1	999		227	227	227		BMY_0565.p01				4a9cac2c1a817d9acdec143b653b9a80_55		197b0243bc5bc4c380ecfb8919a026b1_5867
J7624_09115		hypothetical protein	3	3	1	1	3436	1	394		179	458	365			a04b031c37c06570dd644ef46d09ac8c_7245													03da1bd30b32560bef8e38ea7761d9fe_7232						B9T12_09630.p01
B9T15_07160		hypothetical protein	3	3	1	1	3429	1	909		1373	2030	1811				2cf5bec40a3ef4476bf46f509f729c16_7653															B9T15_07160.p01	B9T14_07130.p01
J7552_02735		hypothetical protein	3	3	1	1	829	1	275		215	221	217								197b0243bc5bc4c380ecfb8919a026b1_2170																	F387_01820.p01	A6V30_00245.p01
J7552_02745		Hypothetical protein	3	3	1	1	825	1	272		845	1061	989								197b0243bc5bc4c380ecfb8919a026b1_2178																	F387_01817.p01	A6V30_00235.p01
A6V30_00225		hypothetical protein	3	3	1	1	823	1	270		458	614	561								197b0243bc5bc4c380ecfb8919a026b1_2186																	F387_01815.p01	A6V30_00225.p01
J7600_09530		hypothetical protein	3	3	1	1	3067	253	1		185	185	185										614e29224da4f337b8899b3142d81070_7561	d977e7edc1a56720a787e465ab4ce472_7470	e653c257947c2dd0a414de7cb159ba14_7462
J7552_09975		hypothetical protein	3	3	1	1	422	100	1		185	195	188								197b0243bc5bc4c380ecfb8919a026b1_7899			d977e7edc1a56720a787e465ab4ce472_3478				83683a6c7ca473684645e0830a47223d_3788
J7552_10065		hypothetical protein	3	3	1	1	2206	1	831	Hypothetical protein with no hits to refseq/uniprot/clusters/cdd/tigrfams/pfam overlapping another protein with hits	161	215	197								197b0243bc5bc4c380ecfb8919a026b1_7969					31e4ba73e5ddb8c85dea419204f0df5a_7843												F387_02028.p01
B9T21_07310		hypothetical protein	3	3	1	1	2650	54	1		212	212	212									79ccbe49faa72747a800162f6a36c0ca_2256									B9T21_07310.p01								A6V30_05355.p01
J7554_08570		hypothetical protein	3	3	1	1	2301	1	1737		224	224	224									79ccbe49faa72747a800162f6a36c0ca_6810																F387_01174.p01	A6V30_04870.p01
J7620_03335		hypothetical protein	3	3	1	1	2188	1	1887		734	761	743									79ccbe49faa72747a800162f6a36c0ca_6966					752b3971131f3206662b5e22da3b23aa_2648									B9T18_01390.p01
A6V30_07010		hypothetical protein	3	3	1	1	597	1	1238		197	197	197																03da1bd30b32560bef8e38ea7761d9fe_7567					B9T11_08770.p01					A6V30_07010.p01
B9T15_02450		hypothetical protein	3	3	1	1	1777	1	1312		404	419	414																03da1bd30b32560bef8e38ea7761d9fe_7642			B9T15_02450.p01	B9T14_02585.p01
B143_RS0102570		hypothetical protein	3	3	1	1	1802	1	1283		839	863	855																	c648bd7c3a222aa51bed3e3836bcf8c8_2012		B9T15_02500.p01	B9T14_02535.p01
B9T14_01185		hypothetical protein	3	3	1	1	1437	1	1807		752	758	754																		B9T21_10160.p01	B9T15_03855.p01	B9T14_01185.p01
B9T13_01070		hypothetical protein	3	3	1	1	654	1	145		1025	1025	1025																					B9T11_01675.p01			B9T13_01070.p01	F387_01047.p01
B9T15_02505		hypothetical protein	3	3	1	1	1797	1	1274		728	728	728	B9T10_02215.p01																		B9T15_02505.p01	B9T14_02530.p01
B9T12_03205		hypothetical protein	3	3	1	1	1951	1	1009		182	182	182	B9T10_03390.p01																					B9T12_03205.p01			F387_01143.p01
J7553_05350		hypothetical protein	3	3	1	1	2160	1	1834		317	317	317	B9T10_03690.p01						ac8fed72b32d7540cf9a1b9ac12df95a_4248														B9T11_04980.p01
J7552_07385		hypothetical protein	3	3	1	1	1954	1	998		266	266	266		BMY_0566.p01				4a9cac2c1a817d9acdec143b653b9a80_51		197b0243bc5bc4c380ecfb8919a026b1_5871
J7553_04535		hypothetical protein	3	3	1	1	3568	51	1		839	839	839			a04b031c37c06570dd644ef46d09ac8c_2757				ac8fed72b32d7540cf9a1b9ac12df95a_3600									03da1bd30b32560bef8e38ea7761d9fe_3310
BMY_2162		hypothetical protein	3	3	1	1	3242	1	862		527	575	543		BMY_2162.p01																	B9T15_09920.p01	B9T14_09890.p01
B9T14_07120		hypothetical protein	3	3	1	1	3431	1	887		641	641	641				2cf5bec40a3ef4476bf46f509f729c16_7645															B9T15_07150.p01	B9T14_07120.p01
J7553_05975		hypothetical protein	3	3	1	1	2016	1	1691		2162	2162	2162							ac8fed72b32d7540cf9a1b9ac12df95a_4743											B9T21_08810.p01					B9T18_01870.p01
B9T21_08805		hypothetical protein	3	3	1	1	2017	1	946		2603	2603	2603							ac8fed72b32d7540cf9a1b9ac12df95a_4747											B9T21_08805.p01					B9T18_01865.p01
J7553_09820		hypothetical protein	3	3	1	1	2434	1	1745		263	263	263							ac8fed72b32d7540cf9a1b9ac12df95a_7777							752b3971131f3206662b5e22da3b23aa_7356									B9T18_01550.p01
B9T18_01555		hypothetical protein	3	3	1	1	2435	1	1744		677	677	677							ac8fed72b32d7540cf9a1b9ac12df95a_7781							752b3971131f3206662b5e22da3b23aa_7352									B9T18_01555.p01
B9T21_06035		hypothetical protein	3	3	1	1	715	52	2		590	590	590								197b0243bc5bc4c380ecfb8919a026b1_1505	79ccbe49faa72747a800162f6a36c0ca_3418									B9T21_06035.p01
J7552_02750		hypothetical protein	3	3	1	1	824	1	271		698	698	698								197b0243bc5bc4c380ecfb8919a026b1_2182																	F387_01816.p01	A6V30_00230.p01
A6V30_00220		hypothetical protein	3	3	1	1	822	1	269		362	362	362								197b0243bc5bc4c380ecfb8919a026b1_2190																	F387_01814.p01	A6V30_00220.p01
J7607_10045		hypothetical protein	3	3	1	1	2202	1	828	Hypothetical protein with no hits to refseq/uniprot/clusters/cdd/tigrfams/pfam overlapping another protein with hits	173	173	173								197b0243bc5bc4c380ecfb8919a026b1_7934					31e4ba73e5ddb8c85dea419204f0df5a_7963												F387_02032.p01
J7607_09895		hypothetical protein	3	3	1	1	2204	1	830		743	743	743								197b0243bc5bc4c380ecfb8919a026b1_7942					31e4ba73e5ddb8c85dea419204f0df5a_7849												F387_02030.p01
B9T12_00470		hypothetical protein	3	3	1	1	1266	5	15		383	383	383									79ccbe49faa72747a800162f6a36c0ca_5742													B9T12_00470.p01	B9T18_04645.p01
B9T14_02505		hypothetical protein	3	3	1	1	1753	1	1336		464	464	464																	c648bd7c3a222aa51bed3e3836bcf8c8_2044		B9T15_02530.p01	B9T14_02505.p01
A6V30_08365		hypothetical protein	3	3	1	1	76	1	670		728	734	730																	c648bd7c3a222aa51bed3e3836bcf8c8_3960	B9T21_03510.p01								A6V30_08365.p01
B9T11_00020		hypothetical protein	3	3	1	1	3383	1	196		647	647	647																			B9T15_01820.p01	B9T14_03210.p01	B9T11_00020.p01
B9T15_01825		hypothetical protein	3	3	1	1	3382	1	195		233	233	233																			B9T15_01825.p01	B9T14_03205.p01	B9T11_00025.p01
B9T11_00030		hypothetical protein	3	3	1	1	3380	1	918		869	869	869																			B9T15_01830.p01	B9T14_03200.p01	B9T11_00030.p01
B9T15_03865		hypothetical protein	3	3	1	1	1441	1	1805		815	830	820							ac8fed72b32d7540cf9a1b9ac12df95a_7887												B9T15_03865.p01	B9T14_01175.p01
B9T18_09985		hypothetical protein	3	3	1	1	2065	1	854		467	467	467																			B9T15_10000.p01	B9T14_09970.p01			B9T18_09985.p01
F387_01046		hypothetical protein	3	3	1	1	655	1	144		977	977	977																					B9T11_01680.p01			B9T13_01065.p01	F387_01046.p01
B9T11_08590		hypothetical protein	3	3	1	1	1809	1	1268		188	188	188																					B9T11_08590.p01		B9T18_01740.p01			A6V30_07185.p01
J7558_09930		hypothetical protein	3	3	1	1	550	1	916	Hypothetical protein with no hits to refseq/uniprot/clusters/cdd/tigrfams/pfam overlapping another protein with hits	4428	7801	5646			a04b031c37c06570dd644ef46d09ac8c_7877	2cf5bec40a3ef4476bf46f509f729c16_7791			ac8fed72b32d7540cf9a1b9ac12df95a_4089
A6V30_04880		hypothetical protein	3	3	1	1	2299	1	1735		113	788	347		BMY_2118.p01				4a9cac2c1a817d9acdec143b653b9a80_3																				A6V30_04880.p01
B9T10_04155		hypothetical protein	3	3	1	1	3246	1	859		386	386	386	B9T10_04155.p01																						B9T18_09970.p01			A6V30_10385.p01
F387_01990		hypothetical protein	3	3	1	1	2948	1	758		224	224	224		BMY_2170.p01												752b3971131f3206662b5e22da3b23aa_7862											F387_01990.p01
B9T21_07170		hypothetical protein	3	3	1	1	2846	9	3		760	4070	2777		BMY_0707.p01											31e4ba73e5ddb8c85dea419204f0df5a_7898					B9T21_07170.p01
BMY_0274		hypothetical protein	3	3	1	1	613	1	165		497	1541	1193		BMY_0274.p01															c648bd7c3a222aa51bed3e3836bcf8c8_2225							B9T13_02020.p01
B9T10_07255		hypothetical protein	3	3	1	1	417	1	354		206	800	404	B9T10_07255.p01																				B9T11_10260.p01	B9T12_09645.p01
B9T10_07850		hypothetical protein	3	3	1	1	723	1	247		1964	2312	2196	B9T10_07850.p01	BMY_1157.p01																								A6V30_00215.p01
BMY_0027		hypothetical protein	3	3	1	1	2379	1	51		227	353	307		BMY_0027.p01														03da1bd30b32560bef8e38ea7761d9fe_8014								B9T13_09870.p01
J7560_06120		hypothetical protein	3	3	1	1	1952	1	945		263	488	413		BMY_0556.p01		2cf5bec40a3ef4476bf46f509f729c16_4852													c648bd7c3a222aa51bed3e3836bcf8c8_1065
BMY_1954		hypothetical protein	3	3	1	1	1233	8	7		458	458	458		BMY_1954.p01															c648bd7c3a222aa51bed3e3836bcf8c8_7220						B9T18_04750.p01
B9T14_01375		hypothetical protein	3	3	1	1	538	1	346		707	1859	1475				2cf5bec40a3ef4476bf46f509f729c16_7689															B9T15_03665.p01	B9T14_01375.p01
J7624_05510		hypothetical protein	3	3	1	1	1261	5	1		440	482	468	B9T10_00460.p01			2cf5bec40a3ef4476bf46f509f729c16_3350												03da1bd30b32560bef8e38ea7761d9fe_4389
J7560_05030		hypothetical protein	3	3	1	1	3391	1	50		523	9845	3781		BMY_0026.p01		2cf5bec40a3ef4476bf46f509f729c16_3997												03da1bd30b32560bef8e38ea7761d9fe_8018
B9T10_03520		hypothetical protein	3	3	1	1	500	1	107		1148	1148	1148	B9T10_03520.p01																		B9T15_03675.p01	B9T14_01365.p01
B9T10_04120		hypothetical protein	2	2	1	1	2257	1	405		467	467	467	B9T10_04120.p01																						B9T18_00970.p01
B9T18_00955		hypothetical protein	2	2	1	1	2260	1	402		1781	1781	1781	B9T10_04135.p01																						B9T18_00955.p01
B9T10_05735		hypothetical protein	2	2	1	1	55	1	657		728	728	728	B9T10_05735.p01						ac8fed72b32d7540cf9a1b9ac12df95a_5477
B9T12_09720		hypothetical protein	2	2	1	1	3422	1	898		884	1787	1335	B9T10_07295.p01																					B9T12_09720.p01
J7552_10050		Hypothetical protein	2	2	1	1	2211	1	748		140	196	168								197b0243bc5bc4c380ecfb8919a026b1_7954																	F387_02027.p01
BMY_0010		hypothetical protein	2	2	1	1	3386	1	1643		449	449	449		BMY_0010.p01												752b3971131f3206662b5e22da3b23aa_7574
J7560_05000		hypothetical protein	2	2	1	1	2167	1	1826		152	209	180		BMY_0031.p01		2cf5bec40a3ef4476bf46f509f729c16_3973
BMY_0286		hypothetical protein	2	2	1	1	611	1	169		86	122	104		BMY_0286.p01																							F387_00190.p01
F387_01157		hypothetical protein	2	2	1	1	2003	1	991		524	668	596		BMY_0576.p01																							F387_01157.p01
BMY_0585		hypothetical protein	2	2	1	1	1995	1	1712		203	539	371		BMY_0585.p01																							F387_01165.p01
BMY_0586		hypothetical protein	2	2	1	1	1994	1	1713		620	704	662		BMY_0586.p01																							F387_01166.p01
F387_01169		Hypothetical protein	2	2	1	1	1991	1	1716		116	497	306		BMY_0590.p01																							F387_01169.p01
BMY_0592		hypothetical protein	2	2	1	1	1989	1	1720		425	509	467		BMY_0592.p01																							F387_01173.p01
B9T21_06915		hypothetical protein	2	2	1	1	2590	1	713		2405	2408	2406		BMY_0654.p01																B9T21_06915.p01
BMY_0798		Hypothetical protein	2	2	1	1	2675	55	2		122	122	122		BMY_0798.p01																							F387_01597.p01
BMY_1018		Hypothetical protein	2	2	1	1	979	10	3		113	134	123		BMY_1018.p01																							F387_00490.p01
J7558_04385		hypothetical protein	2	2	1	1	102	1	628		155	557	356		BMY_1498.p01	a04b031c37c06570dd644ef46d09ac8c_3490
BMY_2138		hypothetical protein	2	2	1	1	2924	1	410		230	230	230		BMY_2138.p01																					B9T18_00995.p01
J7620_09835		hypothetical protein	2	2	1	1	2954	1	743		341	368	354		BMY_2174.p01												752b3971131f3206662b5e22da3b23aa_7799
B9T11_07760		hypothetical protein	2	2	1	1	2409	1	77		671	671	671																					B9T11_07760.p01			B9T13_02775.p01
B9T11_07765		hypothetical protein	2	2	1	1	2410	1	78		263	305	284																					B9T11_07765.p01			B9T13_02780.p01
J7624_10060		hypothetical protein	2	2	1	1	2169	1	1825		320	338	329				2cf5bec40a3ef4476bf46f509f729c16_3969												03da1bd30b32560bef8e38ea7761d9fe_7974
J7560_05940		hypothetical protein	2	2	1	1	2268	50	3		1013	2216	1614				2cf5bec40a3ef4476bf46f509f729c16_4716				197b0243bc5bc4c380ecfb8919a026b1_7630
A6V30_10055		hypothetical protein	2	2	1	1	2225	1	727		1004	1058	1031				2cf5bec40a3ef4476bf46f509f729c16_7757																						A6V30_10055.p01
J7561_00075		hypothetical protein	2	2	1	1	1956	1	996		197	221	209						4a9cac2c1a817d9acdec143b653b9a80_59		197b0243bc5bc4c380ecfb8919a026b1_5863
J7620_10010		hypothetical protein	2	2	1	1	2326	1	1816		635	725	680							ac8fed72b32d7540cf9a1b9ac12df95a_7924							752b3971131f3206662b5e22da3b23aa_7925
B9T18_10000		hypothetical protein	2	2	1	1	2062	1	521		1055	1130	1092								197b0243bc5bc4c380ecfb8919a026b1_7787															B9T18_10000.p01
J7606_08650		hypothetical protein	2	2	1	1	2998	219	1		185	185	185										614e29224da4f337b8899b3142d81070_6318		e653c257947c2dd0a414de7cb159ba14_6868
A6V30_04905		hypothetical protein	2	2	1	1	2309	1	1663		1421	2267	1844									79ccbe49faa72747a800162f6a36c0ca_3																	A6V30_04905.p01
F387_01519		hypothetical protein	2	2	1	1	367	27	1		443	443	443									79ccbe49faa72747a800162f6a36c0ca_3589																F387_01519.p01
F387_01520		hypothetical protein	2	2	1	1	366	27	2		314	314	314									79ccbe49faa72747a800162f6a36c0ca_3593																F387_01520.p01
F387_01521		Hypothetical protein	2	2	1	1	365	27	9		434	440	437									79ccbe49faa72747a800162f6a36c0ca_3597																F387_01521.p01
J7554_04540		Hypothetical protein	2	2	1	1	364	27	8		206	206	206									79ccbe49faa72747a800162f6a36c0ca_3601																F387_01522.p01
J7554_08840		hypothetical protein	2	2	1	1	2514	1	1648		1304	1304	1304									79ccbe49faa72747a800162f6a36c0ca_7020															B9T13_10060.p01
F387_02000		hypothetical protein	2	2	1	1	3234	1	439		1340	1433	1386													31e4ba73e5ddb8c85dea419204f0df5a_7811												F387_02000.p01
B9T13_01960		hypothetical protein	2	2	1	1	624	1	164		263	356	309																	c648bd7c3a222aa51bed3e3836bcf8c8_2269							B9T13_01960.p01
B9T21_07450		hypothetical protein	2	2	1	1	2783	4	10		233	242	237																		B9T21_07450.p01	B9T15_00445.p01
B9T21_09320		hypothetical protein	2	2	1	1	3413	1	358		302	794	548																		B9T21_09320.p01					B9T18_05425.p01
B9T14_01200		hypothetical protein	2	2	1	1	2323	1	1812		230	254	242																			B9T15_03840.p01	B9T14_01200.p01
B9T15_09925		hypothetical protein	2	2	1	1	3229	1	863		380	380	380																			B9T15_09925.p01	B9T14_09895.p01
B9T11_08570		hypothetical protein	2	2	1	1	1971	1	1262		1001	1865	1433																					B9T11_08570.p01	B9T12_03310.p01
B9T18_01700		hypothetical protein	2	2	1	1	1789	1	1290		635	869	752																					B9T11_08630.p01		B9T18_01700.p01
A6V30_00920		Hypothetical protein	2	2	1	1	977	10	6		206	206	206																									F387_00488.p01	A6V30_00920.p01
F387_01947		Hypothetical protein	2	2	1	1	123	133	1		799	5618	3208																									F387_01947.p01	A6V30_07940.p01
BMY_2171		hypothetical protein	2	2	1	1	2949	1	752		266	266	266		BMY_2171.p01																							F387_01991.p01
B143_RS0102600		hypothetical protein	2	2	1	1	1822	1	1337		185	188	186	B9T10_02190.p01																c648bd7c3a222aa51bed3e3836bcf8c8_2040
B9T12_03210		hypothetical protein	2	2	1	1	2019	1	942		248	248	248	B9T10_03395.p01																					B9T12_03210.p01
B9T10_03500		hypothetical protein	2	2	1	1	3407	1	341		179	179	179	B9T10_03500.p01																							B9T13_03595.p01
B9T13_03600		hypothetical protein	2	2	1	1	3406	1	340		407	407	407	B9T10_03505.p01																							B9T13_03600.p01
B9T10_03800		hypothetical protein	2	2	1	1	2461	1	122		206	206	206	B9T10_03800.p01																					B9T12_04585.p01
B9T10_04110		hypothetical protein	2	2	1	1	2253	1	720		5345	5360	5352	B9T10_04110.p01																									A6V30_04985.p01
B9T10_04125		hypothetical protein	2	2	1	1	2258	1	404		1001	1001	1001	B9T10_04125.p01																						B9T18_00965.p01
B9T10_04130		hypothetical protein	2	2	1	1	2259	1	403		251	251	251	B9T10_04130.p01																						B9T18_00960.p01
B9T10_04140		hypothetical protein	2	2	1	1	2261	1	401		311	311	311	B9T10_04140.p01																						B9T18_00950.p01
B9T18_00945		hypothetical protein	2	2	1	1	2262	1	400		323	323	323	B9T10_04145.p01																						B9T18_00945.p01
BMY_0434		hypothetical protein	2	2	1	1	565	1	189		353	1115	734		BMY_0434.p01															c648bd7c3a222aa51bed3e3836bcf8c8_1531
B9T10_05720		hypothetical protein	2	2	1	1	52	1	660		983	983	983	B9T10_05720.p01						ac8fed72b32d7540cf9a1b9ac12df95a_5489
B9T10_05725		hypothetical protein	2	2	1	1	53	1	659		779	779	779	B9T10_05725.p01						ac8fed72b32d7540cf9a1b9ac12df95a_5485
B9T10_05800		hypothetical protein	2	2	1	1	41	1	558		1268	1268	1268	B9T10_05800.p01																							B9T13_04290.p01
B9T13_04295		hypothetical protein	2	2	1	1	42	1	557		1205	1205	1205	B9T10_05805.p01																							B9T13_04295.p01
B9T10_05810		hypothetical protein	2	2	1	1	43	1	556		974	974	974	B9T10_05810.p01																							B9T13_04300.p01
B9T10_07895		hypothetical protein	2	2	1	1	815	1	293		1463	1463	1463	B9T10_07895.p01																						B9T18_07730.p01
BMY_0047		hypothetical protein	2	2	1	1	1473	1	4		644	644	644		BMY_0047.p01		2cf5bec40a3ef4476bf46f509f729c16_3879
BMY_0034		hypothetical protein	2	2	1	1	2174	1	10		686	686	686		BMY_0034.p01		2cf5bec40a3ef4476bf46f509f729c16_3949
J7560_04940		hypothetical protein	2	2	1	1	2191	1	1895		752	752	752		BMY_0037.p01		2cf5bec40a3ef4476bf46f509f729c16_3925
J7560_04935		hypothetical protein	2	2	1	1	2190	1	1896		677	677	677		BMY_0038.p01		2cf5bec40a3ef4476bf46f509f729c16_3921
F387_01158		hypothetical protein	2	2	1	1	2002	1	990		2987	2987	2987		BMY_0577.p01																							F387_01158.p01
F387_01159		Hypothetical protein	2	2	1	1	2001	1	989		3728	3728	3728		BMY_0578.p01																							F387_01159.p01
F387_01160		Hypothetical protein	2	2	1	1	2000	1	988		2570	2570	2570		BMY_0579.p01																							F387_01160.p01
F387_01162		Hypothetical protein	2	2	1	1	1998	1	1709		3527	3527	3527		BMY_0582.p01																							F387_01162.p01
F387_01163		hypothetical protein	2	2	1	1	1997	1	1710		1493	1493	1493		BMY_0583.p01																							F387_01163.p01
F387_01164		hypothetical protein	2	2	1	1	1996	1	1711		728	728	728		BMY_0584.p01																							F387_01164.p01
F387_01168		Hypothetical protein	2	2	1	1	1992	1	1715		1145	1145	1145		BMY_0589.p01																							F387_01168.p01
B9T18_00990		hypothetical protein	2	2	1	1	2923	1	409		416	416	416		BMY_2137.p01																					B9T18_00990.p01
B9T11_07925		hypothetical protein	2	2	1	1	1435	1	1901		830	830	830			a04b031c37c06570dd644ef46d09ac8c_3975																		B9T11_07925.p01
B9T10_10120		hypothetical protein	2	2	1	1	1444	1	1907		563	626	594	B9T10_10120.p01						ac8fed72b32d7540cf9a1b9ac12df95a_1303
J7624_00145		hypothetical protein	2	2	1	1	1967	1	1658		635	635	635			a04b031c37c06570dd644ef46d09ac8c_4459													03da1bd30b32560bef8e38ea7761d9fe_115
J7624_07315		hypothetical protein	2	2	1	1	2264	242	1		398	398	398			a04b031c37c06570dd644ef46d09ac8c_5765													03da1bd30b32560bef8e38ea7761d9fe_5816
BMY_1220		hypothetical protein	2	2	1	1	3063	61	1		2327	9461	5894		BMY_1220.p01																								A6V30_06640.p01
J7560_04875		hypothetical protein	2	2	1	1	1472	1	3		263	263	263				2cf5bec40a3ef4476bf46f509f729c16_3875												03da1bd30b32560bef8e38ea7761d9fe_3863
F387_01762		hypothetical protein	2	2	1	1	2635	6	4		614	614	614				2cf5bec40a3ef4476bf46f509f729c16_5273																					F387_01762.p01
J7560_09785		hypothetical protein	2	2	1	1	2061	1	855		173	173	173				2cf5bec40a3ef4476bf46f509f729c16_7741			ac8fed72b32d7540cf9a1b9ac12df95a_7849
A6V30_10050		hypothetical protein	2	2	1	1	2226	1	726		254	254	254				2cf5bec40a3ef4476bf46f509f729c16_7753																						A6V30_10050.p01
J7561_05945		hypothetical protein	2	2	1	1	67	1	651	Hypothetical protein with no hits to refseq/uniprot/clusters/cdd/tigrfams/pfam overlapping another protein with hits	326	326	326					102e21fe2bbcace64a7555dd0bcc9007_4972	4a9cac2c1a817d9acdec143b653b9a80_4735
J7547_06315		hypothetical protein	2	2	1	1	340	18	3		1628	1628	1628					102e21fe2bbcace64a7555dd0bcc9007_5028	4a9cac2c1a817d9acdec143b653b9a80_4679
J7561_06935		hypothetical protein	2	2	1	1	2784	4	16		1532	1532	1532					102e21fe2bbcace64a7555dd0bcc9007_5486	4a9cac2c1a817d9acdec143b653b9a80_5521
J7547_06900		hypothetical protein	2	2	1	1	2785	4	15		1097	1097	1097					102e21fe2bbcace64a7555dd0bcc9007_5490	4a9cac2c1a817d9acdec143b653b9a80_5525
J7547_07225		hypothetical protein	2	2	1	1	2614	6	1		614	614	614					102e21fe2bbcace64a7555dd0bcc9007_5749	4a9cac2c1a817d9acdec143b653b9a80_5801
J7561_07315		hypothetical protein	2	2	1	1	2622	6	36		1247	1247	1247					102e21fe2bbcace64a7555dd0bcc9007_5773	4a9cac2c1a817d9acdec143b653b9a80_5825
J7561_07325		hypothetical protein	2	2	1	1	2620	6	34		173	173	173					102e21fe2bbcace64a7555dd0bcc9007_5781	4a9cac2c1a817d9acdec143b653b9a80_5833
J7561_07350		hypothetical protein	2	2	1	1	2615	6	29		1223	1223	1223					102e21fe2bbcace64a7555dd0bcc9007_5801	4a9cac2c1a817d9acdec143b653b9a80_5853
J7561_04425		hypothetical protein	2	2	1	1	1150	33	2		1973	1973	1973					102e21fe2bbcace64a7555dd0bcc9007_6363	4a9cac2c1a817d9acdec143b653b9a80_3523
J7561_04430		hypothetical protein	2	2	1	1	1149	33	3		2048	2048	2048					102e21fe2bbcace64a7555dd0bcc9007_6367	4a9cac2c1a817d9acdec143b653b9a80_3527
J7561_04435		hypothetical protein	2	2	1	1	1148	33	4		431	431	431					102e21fe2bbcace64a7555dd0bcc9007_6371	4a9cac2c1a817d9acdec143b653b9a80_3531
J7561_04445		hypothetical protein	2	2	1	1	1146	33	6		503	503	503					102e21fe2bbcace64a7555dd0bcc9007_6379	4a9cac2c1a817d9acdec143b653b9a80_3539
J7547_08050		hypothetical protein	2	2	1	1	1141	33	11		1757	1757	1757					102e21fe2bbcace64a7555dd0bcc9007_6399	4a9cac2c1a817d9acdec143b653b9a80_3559
J7561_08180		hypothetical protein	2	2	1	1	3186	1	786		845	845	845					102e21fe2bbcace64a7555dd0bcc9007_6478	4a9cac2c1a817d9acdec143b653b9a80_6507
J7561_08875		hypothetical protein	2	2	1	1	694	150	1		833	833	833					102e21fe2bbcace64a7555dd0bcc9007_7272	4a9cac2c1a817d9acdec143b653b9a80_7050
J7547_09725		hypothetical protein	2	2	1	1	390	1	233		1679	1679	1679					102e21fe2bbcace64a7555dd0bcc9007_7709	4a9cac2c1a817d9acdec143b653b9a80_7729
J7561_09740		hypothetical protein	2	2	1	1	391	1	232		1175	1175	1175					102e21fe2bbcace64a7555dd0bcc9007_7713	4a9cac2c1a817d9acdec143b653b9a80_7725
J7561_09735		hypothetical protein	2	2	1	1	392	1	231		1205	1205	1205					102e21fe2bbcace64a7555dd0bcc9007_7717	4a9cac2c1a817d9acdec143b653b9a80_7721
J7547_09755		hypothetical protein	2	2	1	1	396	1	375		2150	2150	2150					102e21fe2bbcace64a7555dd0bcc9007_7733	4a9cac2c1a817d9acdec143b653b9a80_7705
J7561_09710		hypothetical protein	2	2	1	1	397	1	376		1115	1115	1115					102e21fe2bbcace64a7555dd0bcc9007_7737	4a9cac2c1a817d9acdec143b653b9a80_7702
J7547_09880		hypothetical protein	2	2	1	1	3230	1	431		164	164	164					102e21fe2bbcace64a7555dd0bcc9007_7824	4a9cac2c1a817d9acdec143b653b9a80_7843
J7553_05160		hypothetical protein	2	2	1	1	3385	1	915		305	305	305							ac8fed72b32d7540cf9a1b9ac12df95a_4096											B9T21_02740.p01
J7553_05190		hypothetical protein	2	2	1	1	522	1	328		2159	2159	2159							ac8fed72b32d7540cf9a1b9ac12df95a_4120											B9T21_02770.p01
J7553_05195		hypothetical protein	2	2	1	1	521	1	327		1460	1484	1472							ac8fed72b32d7540cf9a1b9ac12df95a_4124											B9T21_02775.p01
B9T21_02780		hypothetical protein	2	2	1	1	520	1	326		1313	1313	1313							ac8fed72b32d7540cf9a1b9ac12df95a_4128											B9T21_02780.p01
B9T11_05035		hypothetical protein	2	2	1	1	1418	1	6		857	857	857							ac8fed72b32d7540cf9a1b9ac12df95a_4291														B9T11_05035.p01
J7620_09590		hypothetical protein	2	2	1	1	1406	1	2		515	515	515							ac8fed72b32d7540cf9a1b9ac12df95a_4307							752b3971131f3206662b5e22da3b23aa_7610
J7554_08790		hypothetical protein	2	2	1	1	1504	1	127		497	497	497							ac8fed72b32d7540cf9a1b9ac12df95a_4802		79ccbe49faa72747a800162f6a36c0ca_6981
J7554_08800		hypothetical protein	2	2	1	1	1506	1	129		827	827	827							ac8fed72b32d7540cf9a1b9ac12df95a_4810		79ccbe49faa72747a800162f6a36c0ca_6989
J7554_08805		hypothetical protein	2	2	1	1	1507	1	130		227	227	227							ac8fed72b32d7540cf9a1b9ac12df95a_4814		79ccbe49faa72747a800162f6a36c0ca_6993
J7553_06080		hypothetical protein	2	2	1	1	1510	1	134		938	938	938							ac8fed72b32d7540cf9a1b9ac12df95a_4826		79ccbe49faa72747a800162f6a36c0ca_7005
J7553_09690		hypothetical protein	2	2	1	1	2350	1	1794		221	221	221							ac8fed72b32d7540cf9a1b9ac12df95a_7675							752b3971131f3206662b5e22da3b23aa_7725
J7620_09650		hypothetical protein	2	2	1	1	2330	1	1754		482	482	482							ac8fed72b32d7540cf9a1b9ac12df95a_7742							752b3971131f3206662b5e22da3b23aa_7658
J7624_09720		hypothetical protein	2	2	1	1	499	1	113		308	332	320																03da1bd30b32560bef8e38ea7761d9fe_7710								B9T13_10095.p01
B9T18_09995		hypothetical protein	2	2	1	1	2063	1	520		275	275	275								197b0243bc5bc4c380ecfb8919a026b1_7790															B9T18_09995.p01
F387_02031		hypothetical protein	2	2	1	1	2203	1	829		746	746	746								197b0243bc5bc4c380ecfb8919a026b1_7938																	F387_02031.p01
B9T12_05110		hypothetical protein	2	2	1	1	732	1	222		950	950	950													31e4ba73e5ddb8c85dea419204f0df5a_3224									B9T12_05110.p01
J7607_04075		hypothetical protein	2	2	1	1	733	1	249		1841	1841	1841													31e4ba73e5ddb8c85dea419204f0df5a_3228									B9T12_05105.p01
B9T12_05100		hypothetical protein	2	2	1	1	735	1	250		1619	1619	1619													31e4ba73e5ddb8c85dea419204f0df5a_3232									B9T12_05100.p01
J7607_04100		hypothetical protein	2	2	1	1	727	1	239		3332	3335	3333													31e4ba73e5ddb8c85dea419204f0df5a_3248									B9T12_05080.p01
B9T12_05075		hypothetical protein	2	2	1	1	741	1	240		932	932	932													31e4ba73e5ddb8c85dea419204f0df5a_3252									B9T12_05075.p01
J7607_04125		hypothetical protein	2	2	1	1	748	1	236		566	566	566													31e4ba73e5ddb8c85dea419204f0df5a_3268													A6V30_00180.p01
A6V30_08380		hypothetical protein	2	2	1	1	79	1	663		1046	1046	1046														752b3971131f3206662b5e22da3b23aa_5043												A6V30_08380.p01
J7620_09225		hypothetical protein	2	2	1	1	530	1	203		440	440	440														752b3971131f3206662b5e22da3b23aa_7324								B9T12_04880.p01
B9T12_04875		hypothetical protein	2	2	1	1	531	1	206		998	998	998														752b3971131f3206662b5e22da3b23aa_7328								B9T12_04875.p01
J7620_09235		hypothetical protein	2	2	1	1	532	1	207		224	224	224														752b3971131f3206662b5e22da3b23aa_7332								B9T12_04870.p01
B9T13_02000		hypothetical protein	2	2	1	1	620	1	1397		329	329	329																	c648bd7c3a222aa51bed3e3836bcf8c8_2241							B9T13_02000.p01
B9T13_01995		hypothetical protein	2	2	1	1	619	1	1396		1421	1421	1421																	c648bd7c3a222aa51bed3e3836bcf8c8_2245							B9T13_01995.p01
B9T13_01965		hypothetical protein	2	2	1	1	623	1	163		260	260	260																	c648bd7c3a222aa51bed3e3836bcf8c8_2265							B9T13_01965.p01
B9T18_10115		hypothetical protein	2	2	1	1	3213	1	724		293	293	293																		B9T21_09655.p01					B9T18_10115.p01
B9T21_09820		Hypothetical protein	2	2	1	1	481	1	884		206	206	206																		B9T21_09820.p01							F387_02013.p01
B9T21_09935		hypothetical protein	2	2	1	1	1411	1	1638		188	188	188																		B9T21_09935.p01			B9T11_05065.p01
B9T14_03765		hypothetical protein	2	2	1	1	2501	1	981		710	710	710																			B9T15_01265.p01	B9T14_03765.p01
B9T14_02635		hypothetical protein	2	2	1	1	589	1	1240		320	320	320																			B9T15_02400.p01	B9T14_02635.p01
B9T14_02630		hypothetical protein	2	2	1	1	588	1	1239		248	248	248																			B9T15_02405.p01	B9T14_02630.p01
B9T14_02550		hypothetical protein	2	2	1	1	1771	1	1297		1220	1220	1220																			B9T15_02485.p01	B9T14_02550.p01
B9T14_02545		hypothetical protein	2	2	1	1	1770	1	1296		404	404	404																			B9T15_02490.p01	B9T14_02545.p01
B9T15_02495		hypothetical protein	2	2	1	1	1801	1	1295		611	611	611																			B9T15_02495.p01	B9T14_02540.p01
B9T15_03720		hypothetical protein	2	2	1	1	2400	1	19		707	707	707																			B9T15_03720.p01	B9T14_01320.p01
B9T15_03845		hypothetical protein	2	2	1	1	1436	1	1811		824	824	824																			B9T15_03845.p01	B9T14_01195.p01
B9T15_03920		hypothetical protein	2	2	1	1	1397	1	1914		1061	1061	1061																			B9T15_03920.p01	B9T14_01120.p01
B9T14_01115		hypothetical protein	2	2	1	1	1398	1	1913		569	569	569																			B9T15_03925.p01	B9T14_01115.p01
B9T15_09875		hypothetical protein	2	2	1	1	2049	1	764		221	221	221																			B9T15_09875.p01	B9T14_09845.p01
B9T15_10010		hypothetical protein	2	2	1	1	2976	1	518		419	419	419																			B9T15_10010.p01	B9T14_09980.p01
B9T14_09985		hypothetical protein	2	2	1	1	2977	1	519		1163	1163	1163																			B9T15_10015.p01	B9T14_09985.p01
B9T14_10025		hypothetical protein	2	2	1	1	2068	1	733		206	206	206																			B9T15_10055.p01	B9T14_10025.p01
B9T15_10090		hypothetical protein	2	2	1	1	2229	1	528		182	182	182																			B9T15_10090.p01	B9T14_10060.p01
B9T13_02765		hypothetical protein	2	2	1	1	2407	1	75		2705	2705	2705																					B9T11_00010.p01			B9T13_02765.p01
B9T11_07805		hypothetical protein	2	2	1	1	2413	1	1758		503	503	503																					B9T11_07805.p01		B9T18_01510.p01
B9T18_06285		hypothetical protein	2	2	1	1	3633	218	1		182	182	182																							B9T18_06285.p01			A6V30_09115.p01
A6V30_06605		hypothetical protein	2	2	1	1	3062	187	1		1037	1037	1037																							B9T18_09860.p01			A6V30_06605.p01
B9T13_10165		hypothetical protein	2	2	1	1	2231	1	527		227	227	227																							B9T18_10170.p01	B9T13_10165.p01
B9T13_01980		hypothetical protein	2	2	1	1	616	1	1393		1106	1112	1109																	c648bd7c3a222aa51bed3e3836bcf8c8_2253							B9T13_01980.p01
F387_01951		Hypothetical protein	2	2	1	1	2079	1	480		1481	1481	1481																								B9T13_10200.p01	F387_01951.p01
F387_01822		hypothetical protein	2	2	1	1	835	1	282		1643	1643	1643																									F387_01822.p01	A6V30_00255.p01
F387_01823		Hypothetical protein	2	2	1	1	834	1	281		1835	1835	1835																									F387_01823.p01	A6V30_00260.p01
A6V30_00270		hypothetical protein	2	2	1	1	832	1	279		815	830	822																									F387_01825.p01	A6V30_00270.p01
F387_02042		hypothetical protein	2	2	1	1	2038	1	468		902	902	902																									F387_02042.p01	A6V30_10170.p01
A6V30_00265		hypothetical protein	2	2	1	1	833	1	280		521	524	522																									F387_01824.p01	A6V30_00265.p01
BMY_0043		hypothetical protein	2	2	1	1	2200	1	1883		788	788	788		BMY_0043.p01																							F387_01985.p01
J7561_10085		hypothetical protein	2	2	1	30	1	81	1	Investigate	467	467	467					102e21fe2bbcace64a7555dd0bcc9007_7954	4a9cac2c1a817d9acdec143b653b9a80_7974
F387_01156		hypothetical protein	2	2	1	1	2004	1	992		329	428	378		BMY_0575.p01																							F387_01156.p01
B9T11_00005		hypothetical protein	2	2	1	1	2408	1	76		248	1073	660																					B9T11_00005.p01			B9T13_02770.p01
J7600_10125		hypothetical protein	2	2	1	37	1	121	1	Investigate	467	467	467										614e29224da4f337b8899b3142d81070_8028		e653c257947c2dd0a414de7cb159ba14_8039
F387_01515		Hypothetical protein	2	2	1	1	358	109	1		206	1217	711									79ccbe49faa72747a800162f6a36c0ca_3570																F387_01515.p01
BMY_0318		hypothetical protein	2	2	1	1	603	1	1350		143	911	527		BMY_0318.p01																							F387_00220.p01
BMY_1015		Hypothetical protein	2	2	1	1	719	10	1		458	926	692		BMY_1015.p01																							F387_00487.p01
BMY_0580		hypothetical protein	2	2	1	1	1999	1	987		1190	2033	1611		BMY_0580.p01																							F387_01161.p01
F387_01167		hypothetical protein	2	2	1	1	1993	1	1714		932	1439	1185		BMY_0587.p01																							F387_01167.p01
J7558_10090		hypothetical protein	2	2	1	1	1434	1	1900		740	848	794			a04b031c37c06570dd644ef46d09ac8c_8000																		B9T11_07915.p01
B9T11_04225		hypothetical protein	2	2	1	1	300	1	609		515	1124	819																				B9T14_05640.p01	B9T11_04225.p01
B9T13_09950		hypothetical protein	2	2	1	1	2187	1	1886		485	752	618																							B9T18_01400.p01	B9T13_09950.p01
A6V30_07220		hypothetical protein	1	1	1	1	128	3	3		722	722	722																										A6V30_07220.p01
BMY_1535		hypothetical protein	1	1	1	1	3737	267	1		569	569	569		BMY_1535.p01
B9T21_09900		hypothetical protein	1	1	1	1	2314	1	1821		254	254	254																		B9T21_09900.p01
BMY_2112		hypothetical protein	1	1	1	1	2293	1	1729		146	146	146		BMY_2112.p01
BMY_0050		hypothetical protein	1	1	1	1	1469	1	1622		662	662	662		BMY_0050.p01
BMY_2110		hypothetical protein	1	1	1	1	2291	1	1727		662	662	662		BMY_2110.p01
BMY_0053		hypothetical protein	1	1	1	1	1466	1	1619		449	449	449		BMY_0053.p01
BMY_2119		hypothetical protein	1	1	1	1	2043	1	458		212	212	212		BMY_2119.p01
BMY_2173		hypothetical protein	1	1	1	1	2951	1	750		329	329	329		BMY_2173.p01
A6V30_10285		hypothetical protein	1	1	1	1	2101	1	809		878	878	878																										A6V30_10285.p01
BMY_0058		hypothetical protein	1	1	1	1	1461	1	1614		521	521	521		BMY_0058.p01
BMY_0063		hypothetical protein	1	1	1	1	636	1	1609		521	521	521		BMY_0063.p01
A6V30_10165		hypothetical protein	1	1	1	1	2037	1	467		350	350	350																										A6V30_10165.p01
A6V30_10270		hypothetical protein	1	1	1	1	2132	1	806		350	350	350																										A6V30_10270.p01
B9T18_10185		hypothetical protein	1	1	1	1	2227	1	524		167	167	167																							B9T18_10185.p01
B9T10_02185		hypothetical protein	1	1	1	1	1823	1	1338		464	464	464	B9T10_02185.p01
B9T10_02205		hypothetical protein	1	1	1	1	1807	1	1273		377	377	377	B9T10_02205.p01
B9T10_02225		hypothetical protein	1	1	1	1	1794	1	1286		983	983	983	B9T10_02225.p01
B9T10_02230		hypothetical protein	1	1	1	1	1793	1	1287		746	746	746	B9T10_02230.p01
B9T10_02240		hypothetical protein	1	1	1	1	1774	1	1245		725	725	725	B9T10_02240.p01
B9T10_02270		hypothetical protein	1	1	1	1	574	1	1310		365	365	365	B9T10_02270.p01
BMY_2183		hypothetical protein	1	1	1	1	3218	1	773		266	266	266		BMY_2183.p01
B9T10_03480		hypothetical protein	1	1	1	1	2477	1	984		1298	1298	1298	B9T10_03480.p01
BMY_0316		hypothetical protein	1	1	1	1	1742	1	176		368	368	368		BMY_0316.p01
BMY_0055		hypothetical protein	1	1	1	1	1464	1	1617		476	476	476		BMY_0055.p01
BMY_0066		hypothetical protein	1	1	1	1	639	1	1606		476	476	476		BMY_0066.p01
B9T10_03680		hypothetical protein	1	1	1	1	2316	1	60		254	254	254	B9T10_03680.p01
B9T10_03685		hypothetical protein	1	1	1	1	2315	1	59		227	227	227	B9T10_03685.p01
B9T10_03695		hypothetical protein	1	1	1	1	2157	1	1841		491	491	491	B9T10_03695.p01
B9T10_03765		hypothetical protein	1	1	1	1	1405	1	1592		971	971	971	B9T10_03765.p01
J7553_06085		hypothetical protein	1	1	1	1	1511	1	133		203	203	203							ac8fed72b32d7540cf9a1b9ac12df95a_4830
B9T10_03775		hypothetical protein	1	1	1	1	1402	1	1591		818	818	818	B9T10_03775.p01
B9T10_03780		hypothetical protein	1	1	1	1	1401	1	123		830	830	830	B9T10_03780.p01
B9T10_03785		hypothetical protein	1	1	1	1	1400	1	124		692	692	692	B9T10_03785.p01
B9T10_04095		hypothetical protein	1	1	1	1	2585	1	705		269	269	269	B9T10_04095.p01
B9T10_05115		hypothetical protein	1	1	1	1	136	56	1		200	200	200	B9T10_05115.p01
BMY_0437		hypothetical protein	1	1	1	1	1925	1	1139		122	122	122		BMY_0437.p01
BMY_0435		hypothetical protein	1	1	1	1	563	1	188		464	464	464		BMY_0435.p01
B9T10_07270		hypothetical protein	1	1	1	1	414	1	893		1523	1523	1523	B9T10_07270.p01
B9T10_07275		hypothetical protein	1	1	1	1	3418	1	894		1517	1517	1517	B9T10_07275.p01
B9T10_07280		hypothetical protein	1	1	1	1	3419	1	895		1364	1364	1364	B9T10_07280.p01
B9T10_07290		hypothetical protein	1	1	1	1	3421	1	897		650	650	650	B9T10_07290.p01
B9T10_07300		hypothetical protein	1	1	1	1	3423	1	899		407	407	407	B9T10_07300.p01
B9T10_07305		hypothetical protein	1	1	1	1	3424	1	900		1139	1139	1139	B9T10_07305.p01
B9T10_07310		hypothetical protein	1	1	1	1	3425	1	901		2807	2807	2807	B9T10_07310.p01
B9T10_07325		hypothetical protein	1	1	1	1	3428	1	904		641	641	641	B9T10_07325.p01
B9T10_07855		hypothetical protein	1	1	1	1	818	1	284		443	443	443	B9T10_07855.p01
B9T10_07860		hypothetical protein	1	1	1	1	819	1	285		2111	2111	2111	B9T10_07860.p01
B9T10_07865		hypothetical protein	1	1	1	1	820	1	286		203	203	203	B9T10_07865.p01
B9T10_07870		hypothetical protein	1	1	1	1	821	1	287		2153	2153	2153	B9T10_07870.p01
B9T10_07905		hypothetical protein	1	1	1	1	813	1	295		2459	2459	2459	B9T10_07905.p01
B9T10_07915		hypothetical protein	1	1	1	1	811	1	297		1169	1169	1169	B9T10_07915.p01
BMY_0002		hypothetical protein	1	1	1	1	1477	1	1632		125	125	125		BMY_0002.p01
BMY_2113		hypothetical protein	1	1	1	1	2294	1	1730		644	644	644		BMY_2113.p01
BMY_0020		hypothetical protein	1	1	1	1	3397	1	44		758	758	758		BMY_0020.p01
BMY_0022		hypothetical protein	1	1	1	1	3395	1	46		170	170	170		BMY_0022.p01
BMY_0023		hypothetical protein	1	1	1	1	3394	1	47		953	953	953		BMY_0023.p01
BMY_0025		hypothetical protein	1	1	1	1	3392	1	49		659	659	659		BMY_0025.p01
BMY_0069		hypothetical protein	1	1	1	1	642	1	1603		176	176	176		BMY_0069.p01
BMY_0070		hypothetical protein	1	1	1	1	643	1	1602		254	254	254		BMY_0070.p01
BMY_0071		hypothetical protein	1	1	1	1	644	1	1601		416	416	416		BMY_0071.p01
BMY_0072		hypothetical protein	1	1	1	1	645	1	1600		119	119	119		BMY_0072.p01
BMY_0073		hypothetical protein	1	1	1	1	646	1	1599		248	248	248		BMY_0073.p01
BMY_0074		hypothetical protein	1	1	1	1	647	1	1598		476	476	476		BMY_0074.p01
BMY_0075		hypothetical protein	1	1	1	1	648	1	1597		161	161	161		BMY_0075.p01
BMY_0076		hypothetical protein	1	1	1	1	649	1	1596		128	128	128		BMY_0076.p01
BMY_0077		hypothetical protein	1	1	1	1	650	1	1595		407	407	407		BMY_0077.p01
BMY_0078		hypothetical protein	1	1	1	1	651	1	1594		122	122	122		BMY_0078.p01
BMY_0133		hypothetical protein	1	1	1	1	634	1	150		128	128	128		BMY_0133.p01
BMY_0170		hypothetical protein	1	1	1	1	631	1	1496		116	116	116		BMY_0170.p01
BMY_0196		hypothetical protein	1	1	1	1	627	1	159		401	401	401		BMY_0196.p01
BMY_0213		hypothetical protein	1	1	1	1	1643	1	161		116	116	116		BMY_0213.p01
BMY_0285		hypothetical protein	1	1	1	1	610	1	168		116	116	116		BMY_0285.p01
BMY_0336		hypothetical protein	1	1	1	1	572	1	179		116	116	116		BMY_0336.p01
BMY_0367		hypothetical protein	1	1	1	1	570	1	1205		128	128	128		BMY_0367.p01
BMY_0432		hypothetical protein	1	1	1	1	1923	1	191		590	590	590		BMY_0432.p01
BMY_0439		hypothetical protein	1	1	1	1	562	1	1135		344	344	344		BMY_0439.p01
BMY_0456		hypothetical protein	1	1	1	1	3367	1	1110		12440	12440	12440		BMY_0456.p01
BMY_0554		hypothetical protein	1	1	1	1	1950	1	944		1289	1289	1289		BMY_0554.p01
BMY_0596		hypothetical protein	1	1	1	1	1984	1	1700		815	815	815		BMY_0596.p01
BMY_0597		hypothetical protein	1	1	1	1	1983	1	1701		1634	1634	1634		BMY_0597.p01
BMY_0656		hypothetical protein	1	1	1	1	2588	1	711		1145	1145	1145		BMY_0656.p01
BMY_0657		hypothetical protein	1	1	1	1	2587	1	710		893	893	893		BMY_0657.p01
BMY_0658		hypothetical protein	1	1	1	1	2586	1	709		1100	1100	1100		BMY_0658.p01
BMY_0705		hypothetical protein	1	1	1	1	2850	9	8		10268	10268	10268		BMY_0705.p01
BMY_0826		hypothetical protein	1	1	1	1	2678	147	1		362	362	362		BMY_0826.p01
BMY_0965		hypothetical protein	1	1	1	1	1033	141	1		116	116	116		BMY_0965.p01
BMY_1010		hypothetical protein	1	1	1	1	716	160	1		146	146	146		BMY_1010.p01
BMY_1112		hypothetical protein	1	1	1	1	884	88	1		140	140	140		BMY_1112.p01
BMY_1156		hypothetical protein	1	1	1	1	826	1	273		188	188	188		BMY_1156.p01
BMY_1194		hypothetical protein	1	1	1	1	758	164	1		128	128	128		BMY_1194.p01
BMY_1282		hypothetical protein	1	1	1	1	3141	63	2		134	134	134		BMY_1282.p01
BMY_1384		hypothetical protein	1	1	1	1	147	237	1		866	866	866		BMY_1384.p01
BMY_1399		hypothetical protein	1	1	1	1	131	74	1		230	230	230		BMY_1399.p01
BMY_1409		hypothetical protein	1	1	1	1	171	3	11		203	203	203		BMY_1409.p01
BMY_1413		hypothetical protein	1	1	1	1	124	205	1		128	128	128		BMY_1413.p01
BMY_1501		hypothetical protein	1	1	1	1	95	1	642		878	878	878		BMY_1501.p01
BMY_1502		hypothetical protein	1	1	1	1	94	1	643		701	701	701		BMY_1502.p01
BMY_1503		hypothetical protein	1	1	1	1	93	1	644		1070	1070	1070		BMY_1503.p01
BMY_1537		hypothetical protein	1	1	1	1	348	214	1		1178	1178	1178		BMY_1537.p01
BMY_1875		hypothetical protein	1	1	1	1	1154	271	1		380	380	380		BMY_1875.p01
BMY_1971		hypothetical protein	1	1	1	1	1257	5	6		278	278	278		BMY_1971.p01
BMY_1972		hypothetical protein	1	1	1	1	1256	5	5		524	524	524		BMY_1972.p01
BMY_1973		hypothetical protein	1	1	1	1	1255	5	2		245	245	245		BMY_1973.p01
BMY_2007		hypothetical protein	1	1	1	1	663	7	1		122	122	122		BMY_2007.p01
BMY_2104		hypothetical protein	1	1	1	1	1499	1	1584		431	431	431		BMY_2104.p01
BMY_2105		hypothetical protein	1	1	1	1	1500	1	1585		248	248	248		BMY_2105.p01
BMY_2106		hypothetical protein	1	1	1	1	1501	1	1586		422	422	422		BMY_2106.p01
BMY_2115		hypothetical protein	1	1	1	1	2296	1	1732		155	155	155		BMY_2115.p01
BMY_2117		hypothetical protein	1	1	1	1	2298	1	1734		428	428	428		BMY_2117.p01
BMY_2120		hypothetical protein	1	1	1	1	2044	1	459		413	413	413		BMY_2120.p01
BMY_2125		hypothetical protein	1	1	1	1	3217	1	839		422	422	422		BMY_2125.p01
BMY_2180		hypothetical protein	1	1	1	1	3221	1	776		422	422	422		BMY_2180.p01
BMY_2136		hypothetical protein	1	1	1	1	2922	1	397		1202	1202	1202		BMY_2136.p01
BMY_2140		hypothetical protein	1	1	1	1	2915	1	412		2639	2639	2639		BMY_2140.p01
BMY_2141		hypothetical protein	1	1	1	1	2914	1	413		1655	1655	1655		BMY_2141.p01
BMY_2148		hypothetical protein	1	1	1	1	2907	1	420		425	425	425		BMY_2148.p01
BMY_2155		hypothetical protein	1	1	1	1	2938	1	879		245	245	245		BMY_2155.p01
BMY_2160		hypothetical protein	1	1	1	1	3243	1	864		245	245	245		BMY_2160.p01
BMY_2164		hypothetical protein	1	1	1	1	3236	1	435		128	128	128		BMY_2164.p01
BMY_2165		hypothetical protein	1	1	1	1	3239	1	434		152	152	152		BMY_2165.p01
BMY_2176		hypothetical protein	1	1	1	1	2940	1	766		125	125	125		BMY_2176.p01
BMY_2114		hypothetical protein	1	1	1	1	2295	1	1731		563	563	563		BMY_2114.p01
BMY_0001		hypothetical protein	1	1	1	1	1476	1	1631		317	317	317		BMY_0001.p01
J7558_04370		hypothetical protein	1	1	1	1	47	1	686		1307	1307	1307			a04b031c37c06570dd644ef46d09ac8c_3478
J7558_05665		hypothetical protein	1	1	1	1	536	1	344		563	563	563			a04b031c37c06570dd644ef46d09ac8c_4507
J7558_05670		hypothetical protein	1	1	1	1	535	1	343		251	251	251			a04b031c37c06570dd644ef46d09ac8c_4511
J7558_06740		hypothetical protein	1	1	1	1	2470	1	96		221	221	221			a04b031c37c06570dd644ef46d09ac8c_5364
J7558_06745		hypothetical protein	1	1	1	1	2471	1	97		518	518	518			a04b031c37c06570dd644ef46d09ac8c_5368
J7558_06755		hypothetical protein	1	1	1	1	2512	1	959		551	551	551			a04b031c37c06570dd644ef46d09ac8c_5376
J7558_06765		hypothetical protein	1	1	1	1	2510	1	964		674	674	674			a04b031c37c06570dd644ef46d09ac8c_5383
J7558_06770		hypothetical protein	1	1	1	1	1812	1	963		773	773	773			a04b031c37c06570dd644ef46d09ac8c_5387
J7558_06850		hypothetical protein	1	1	1	1	1762	1	1294		1187	1187	1187			a04b031c37c06570dd644ef46d09ac8c_5451
J7558_06890		hypothetical protein	1	1	1	1	575	1	1306		365	365	365			a04b031c37c06570dd644ef46d09ac8c_5483
J7558_06935		hypothetical protein	1	1	1	1	573	1	1324		245	245	245			a04b031c37c06570dd644ef46d09ac8c_5519
J7558_09140		hypothetical protein	1	1	1	1	420	1	391		656	656	656			a04b031c37c06570dd644ef46d09ac8c_7255
J7558_10015		hypothetical protein	1	1	1	1	2093	1	510		542	542	542			a04b031c37c06570dd644ef46d09ac8c_7945
J7558_10100		hypothetical protein	1	1	1	22	2	89	2	Investigate	680	680	680			a04b031c37c06570dd644ef46d09ac8c_8008
J7560_01875		hypothetical protein	1	1	1	1	842	1	266		188	188	188				2cf5bec40a3ef4476bf46f509f729c16_1491
J7560_01905		hypothetical protein	1	1	1	1	807	1	260		254	254	254				2cf5bec40a3ef4476bf46f509f729c16_1515
J7560_04965		hypothetical protein	1	1	1	1	2175	1	1838		329	329	329				2cf5bec40a3ef4476bf46f509f729c16_3945
J7560_04980		hypothetical protein	1	1	1	1	2172	1	1819		254	254	254				2cf5bec40a3ef4476bf46f509f729c16_3957
J7560_04990		hypothetical protein	1	1	1	1	2170	1	1817		254	254	254				2cf5bec40a3ef4476bf46f509f729c16_3965
J7560_05025		hypothetical protein	1	1	1	1	2311	1	16		353	353	353				2cf5bec40a3ef4476bf46f509f729c16_3993
J7560_05935		hypothetical protein	1	1	1	1	2267	50	2		341	341	341				2cf5bec40a3ef4476bf46f509f729c16_4712
BMY_2196		hypothetical protein	1	1	1	1	2207	1	832		122	122	122		BMY_2196.p01
J7560_06685		hypothetical protein	1	1	1	1	2629	6	20		1247	1247	1247				2cf5bec40a3ef4476bf46f509f729c16_5297
J7560_06695		hypothetical protein	1	1	1	1	2627	6	18		1307	1307	1307				2cf5bec40a3ef4476bf46f509f729c16_5305
J7560_06710		hypothetical protein	1	1	1	1	2606	6	15		461	461	461				2cf5bec40a3ef4476bf46f509f729c16_5317
J7560_06715		hypothetical protein	1	1	1	1	2607	6	14		572	572	572				2cf5bec40a3ef4476bf46f509f729c16_5321
J7560_06735		hypothetical protein	1	1	1	1	2610	6	11		389	389	389				2cf5bec40a3ef4476bf46f509f729c16_5335
J7560_08235		hypothetical protein	1	1	1	1	3012	110	2		323	323	323				2cf5bec40a3ef4476bf46f509f729c16_6521
J7560_08240		hypothetical protein	1	1	1	1	2997	110	1		761	761	761				2cf5bec40a3ef4476bf46f509f729c16_6525
J7560_09810		hypothetical protein	1	1	1	1	2223	1	728		536	536	536				2cf5bec40a3ef4476bf46f509f729c16_7761
J7560_09930		hypothetical protein	1	1	1	19	1	105	1	Investigate	794	794	794				2cf5bec40a3ef4476bf46f509f729c16_7850
B9T11_10155		hypothetical protein	1	1	1	1	2936	1	517		191	191	191																					B9T11_10155.p01
B9T21_09975		hypothetical protein	1	1	1	1	2365	1	1830		791	791	791																		B9T21_09975.p01
J7561_00010		hypothetical protein	1	1	1	1	2235	1	531		452	452	452						4a9cac2c1a817d9acdec143b653b9a80_7
J7553_01870		hypothetical protein	1	1	1	1	2265	181	1		410	410	410							ac8fed72b32d7540cf9a1b9ac12df95a_1483
J7553_05340		hypothetical protein	1	1	1	1	2158	1	1832		254	254	254							ac8fed72b32d7540cf9a1b9ac12df95a_4240
J7553_06045		hypothetical protein	1	1	1	1	1503	1	125		158	158	158							ac8fed72b32d7540cf9a1b9ac12df95a_4798
J7553_06890		hypothetical protein	1	1	1	1	51	1	656		401	401	401							ac8fed72b32d7540cf9a1b9ac12df95a_5473
J7553_09685		hypothetical protein	1	1	1	1	2349	1	1793		254	254	254							ac8fed72b32d7540cf9a1b9ac12df95a_7671
J7553_09780		hypothetical protein	1	1	1	1	2416	1	1755		1100	1100	1100							ac8fed72b32d7540cf9a1b9ac12df95a_7745
J7553_09790		hypothetical protein	1	1	1	1	2418	1	1757		443	443	443							ac8fed72b32d7540cf9a1b9ac12df95a_7753
J7553_09850		hypothetical protein	1	1	1	1	2280	1	1738		311	311	311							ac8fed72b32d7540cf9a1b9ac12df95a_7801
J7553_09980		hypothetical protein	1	1	1	1	1440	1	1806		734	734	734							ac8fed72b32d7540cf9a1b9ac12df95a_7897
J7553_09995		hypothetical protein	1	1	1	1	2322	1	1810		416	416	416							ac8fed72b32d7540cf9a1b9ac12df95a_7908
J7553_10070		hypothetical protein	1	1	1	5	3	65	3		293	293	293							ac8fed72b32d7540cf9a1b9ac12df95a_7962
J7553_10085		hypothetical protein	1	1	1	25	1	118	1	Investigate	2859	2859	2859							ac8fed72b32d7540cf9a1b9ac12df95a_7973
J7553_10110		hypothetical protein	1	1	1	20	2	82	1	Investigate	524	524	524							ac8fed72b32d7540cf9a1b9ac12df95a_7991
J7553_10115		hypothetical protein	1	1	1	20	1	82	2	Investigate	470	470	470							ac8fed72b32d7540cf9a1b9ac12df95a_7995
J7553_10140		hypothetical protein	1	1	1	14	1	101	1	Investigate	319	319	319							ac8fed72b32d7540cf9a1b9ac12df95a_8015
J7552_01675		hypothetical protein	1	1	1	1	3376	1	927		788	788	788								197b0243bc5bc4c380ecfb8919a026b1_1332
J7552_01705		hypothetical protein	1	1	1	1	3370	1	921		383	383	383								197b0243bc5bc4c380ecfb8919a026b1_1356
J7552_03010		hypothetical protein	1	1	1	1	368	76	2		635	635	635								197b0243bc5bc4c380ecfb8919a026b1_2389
J7552_05520		hypothetical protein	1	1	1	1	117	31	7		1412	1412	1412								197b0243bc5bc4c380ecfb8919a026b1_4393
J7552_05525		hypothetical protein	1	1	1	1	116	31	8		1844	1844	1844								197b0243bc5bc4c380ecfb8919a026b1_4397
J7552_05530		hypothetical protein	1	1	1	1	115	31	9		1088	1088	1088								197b0243bc5bc4c380ecfb8919a026b1_4401
J7552_05540		hypothetical protein	1	1	1	1	113	31	11		1826	1826	1826								197b0243bc5bc4c380ecfb8919a026b1_4409
J7552_05545		hypothetical protein	1	1	1	1	112	31	12		1514	1514	1514								197b0243bc5bc4c380ecfb8919a026b1_4413
J7552_06475		hypothetical protein	1	1	1	1	2655	4	37		1310	1310	1310								197b0243bc5bc4c380ecfb8919a026b1_5150
J7552_06485		hypothetical protein	1	1	1	1	2657	4	35		971	971	971								197b0243bc5bc4c380ecfb8919a026b1_5158
J7552_06490		hypothetical protein	1	1	1	1	2658	4	34		986	986	986								197b0243bc5bc4c380ecfb8919a026b1_5162
J7552_06845		hypothetical protein	1	1	1	1	1947	1	1105		686	686	686								197b0243bc5bc4c380ecfb8919a026b1_5442
J7552_08855		hypothetical protein	1	1	1	1	2995				1016	1016	1016								197b0243bc5bc4c380ecfb8919a026b1_7032
J7552_09175		hypothetical protein	1	1	1	1	3437	1	392		260	260	260								197b0243bc5bc4c380ecfb8919a026b1_7281
J7552_09205		hypothetical protein	1	1	1	1	3170	45	6		1121	1121	1121								197b0243bc5bc4c380ecfb8919a026b1_7305
J7552_09430		hypothetical protein	1	1	1	1	2446	1	1666		281	281	281								197b0243bc5bc4c380ecfb8919a026b1_7484
J7552_09445		hypothetical protein	1	1	1	1	2449	1	1669		254	254	254								197b0243bc5bc4c380ecfb8919a026b1_7495
J7552_09455		hypothetical protein	1	1	1	1	2450	1	1679		251	251	251								197b0243bc5bc4c380ecfb8919a026b1_7503
J7552_09470		hypothetical protein	1	1	1	1	2023	1	1682		470	470	470								197b0243bc5bc4c380ecfb8919a026b1_7514
J7552_09475		hypothetical protein	1	1	1	1	2024	1	1683		392	392	392								197b0243bc5bc4c380ecfb8919a026b1_7518
J7552_09480		hypothetical protein	1	1	1	1	2025	1	1684		509	509	509								197b0243bc5bc4c380ecfb8919a026b1_7522
J7552_09485		hypothetical protein	1	1	1	1	2026	1	1685		218	218	218								197b0243bc5bc4c380ecfb8919a026b1_7526
J7552_09495		hypothetical protein	1	1	1	1	2027	1	1686		677	677	677								197b0243bc5bc4c380ecfb8919a026b1_7532
J7552_09500		hypothetical protein	1	1	1	1	2028	1	1687		806	806	806								197b0243bc5bc4c380ecfb8919a026b1_7536
J7552_09520		hypothetical protein	1	1	1	1	2277	1	1695		3497	3497	3497								197b0243bc5bc4c380ecfb8919a026b1_7552
J7552_09525		hypothetical protein	1	1	1	1	2278	1	1696		1229	1229	1229								197b0243bc5bc4c380ecfb8919a026b1_7556
J7552_09530		hypothetical protein	1	1	1	1	2279	1	1697		1316	1316	1316								197b0243bc5bc4c380ecfb8919a026b1_7560
J7552_09620		hypothetical protein	1	1	1	1	2269	50	4		146	146	146								197b0243bc5bc4c380ecfb8919a026b1_7626
J7552_09630		hypothetical protein	1	1	1	1	2710	304	1		152	152	152								197b0243bc5bc4c380ecfb8919a026b1_7634
J7552_09970		hypothetical protein	1	1	1	1	3235	1	436		2152	2152	2152								197b0243bc5bc4c380ecfb8919a026b1_7895
J7552_10010		hypothetical protein	1	1	1	1	3249	1	731		431	431	431								197b0243bc5bc4c380ecfb8919a026b1_7922
J7554_04545		hypothetical protein	1	1	1	1	361	27	7		869	869	869									79ccbe49faa72747a800162f6a36c0ca_3605
J7554_04555		hypothetical protein	1	1	1	1	360	27	4		983	983	983									79ccbe49faa72747a800162f6a36c0ca_3613
J7554_04560		hypothetical protein	1	1	1	1	359	27	3		416	416	416									79ccbe49faa72747a800162f6a36c0ca_3617
J7554_08550		hypothetical protein	1	1	1	1	2286	1	1722		356	356	356									79ccbe49faa72747a800162f6a36c0ca_6794
J7554_08560		hypothetical protein	1	1	1	1	2288	1	1724		167	167	167									79ccbe49faa72747a800162f6a36c0ca_6802
J7554_08565		hypothetical protein	1	1	1	1	2289	1	1725		1916	1916	1916									79ccbe49faa72747a800162f6a36c0ca_6806
J7554_08590		hypothetical protein	1	1	1	1	2281	1	1746		347	347	347									79ccbe49faa72747a800162f6a36c0ca_6825
J7554_08605		hypothetical protein	1	1	1	1	2432	1	1749		905	905	905									79ccbe49faa72747a800162f6a36c0ca_6837
J7554_08635		hypothetical protein	1	1	1	1	2425	1	69		1091	1091	1091									79ccbe49faa72747a800162f6a36c0ca_6861
J7554_08645		hypothetical protein	1	1	1	1	2423	1	71		494	494	494									79ccbe49faa72747a800162f6a36c0ca_6869
J7554_08725		hypothetical protein	1	1	1	1	2345	1	1789		236	236	236									79ccbe49faa72747a800162f6a36c0ca_6931
J7554_08745		hypothetical protein	1	1	1	1	2366	1	1804		992	992	992									79ccbe49faa72747a800162f6a36c0ca_6947
J7554_08755		hypothetical protein	1	1	1	1	2179	1	1898		158	158	158									79ccbe49faa72747a800162f6a36c0ca_6955
J7554_08785		hypothetical protein	1	1	1	1	1502	1	126		158	158	158									79ccbe49faa72747a800162f6a36c0ca_6978
J7554_08835		hypothetical protein	1	1	1	1	2513	1	1646		221	221	221									79ccbe49faa72747a800162f6a36c0ca_7016
J7554_09125		hypothetical protein	1	1	1	1	405	1	906		497	497	497									79ccbe49faa72747a800162f6a36c0ca_7237
J7554_09130		hypothetical protein	1	1	1	1	404	1	907		368	368	368									79ccbe49faa72747a800162f6a36c0ca_7241
J7554_09550		hypothetical protein	1	1	1	1	2032	1	441		245	245	245									79ccbe49faa72747a800162f6a36c0ca_7568
J7554_09720		hypothetical protein	1	1	1	1	2306	1	1653		179	179	179									79ccbe49faa72747a800162f6a36c0ca_7700
J7607_00515		hypothetical protein	1	1	1	1	2459	1	84		1292	1292	1292													31e4ba73e5ddb8c85dea419204f0df5a_405
J7607_00520		hypothetical protein	1	1	1	1	2458	1	83		221	221	221													31e4ba73e5ddb8c85dea419204f0df5a_409
J7607_00525		hypothetical protein	1	1	1	1	1419	1	82		233	233	233													31e4ba73e5ddb8c85dea419204f0df5a_413
J7607_00530		hypothetical protein	1	1	1	1	1420	1	81		707	707	707													31e4ba73e5ddb8c85dea419204f0df5a_417
J7607_00535		hypothetical protein	1	1	1	1	1421	1	80		386	386	386													31e4ba73e5ddb8c85dea419204f0df5a_421
J7607_00550		hypothetical protein	1	1	1	1	1424	1	1863		242	242	242													31e4ba73e5ddb8c85dea419204f0df5a_433
J7607_00620		hypothetical protein	1	1	1	1	2185	1	1894		233	233	233													31e4ba73e5ddb8c85dea419204f0df5a_488
J7607_00625		hypothetical protein	1	1	1	1	2184	1	1893		200	200	200													31e4ba73e5ddb8c85dea419204f0df5a_492
J7607_00635		hypothetical protein	1	1	1	1	2182	1	1891		242	242	242													31e4ba73e5ddb8c85dea419204f0df5a_500
J7607_00640		hypothetical protein	1	1	1	1	2181	1	1890		545	545	545													31e4ba73e5ddb8c85dea419204f0df5a_504
J7607_00645		hypothetical protein	1	1	1	1	2180	1	1889		152	152	152													31e4ba73e5ddb8c85dea419204f0df5a_508
J7607_00750		hypothetical protein	1	1	1	1	2485	1	1774		356	356	356													31e4ba73e5ddb8c85dea419204f0df5a_592
J7607_00755		hypothetical protein	1	1	1	1	2486	1	1773		236	236	236													31e4ba73e5ddb8c85dea419204f0df5a_596
J7607_00775		hypothetical protein	1	1	1	1	2490	1	952		3098	3098	3098													31e4ba73e5ddb8c85dea419204f0df5a_612
J7607_00780		hypothetical protein	1	1	1	1	2491	1	953		500	500	500													31e4ba73e5ddb8c85dea419204f0df5a_616
J7607_00785		hypothetical protein	1	1	1	1	2492	1	954		1514	1514	1514													31e4ba73e5ddb8c85dea419204f0df5a_620
J7607_00790		hypothetical protein	1	1	1	1	2493	1	955		740	740	740													31e4ba73e5ddb8c85dea419204f0df5a_624
J7607_03175		hypothetical protein	1	1	1	1	1019	52	1		497	497	497													31e4ba73e5ddb8c85dea419204f0df5a_2515
J7607_04065		hypothetical protein	1	1	1	1	731	1	223		848	848	848													31e4ba73e5ddb8c85dea419204f0df5a_3220
J7607_05465		hypothetical protein	1	1	1	1	388	1	368		566	566	566													31e4ba73e5ddb8c85dea419204f0df5a_4340
J7607_06720		hypothetical protein	1	1	1	1	2663	4	27		1613	1613	1613													31e4ba73e5ddb8c85dea419204f0df5a_5340
J7607_08960		hypothetical protein	1	1	1	1	695	38	2		830	830	830													31e4ba73e5ddb8c85dea419204f0df5a_7115
J7620_01195		hypothetical protein	1	1	1	1	608	1	170		188	188	188														752b3971131f3206662b5e22da3b23aa_947
J7620_03195		hypothetical protein	1	1	1	1	2525	221	1		1118	1118	1118														752b3971131f3206662b5e22da3b23aa_2540
J7620_06435		hypothetical protein	1	1	1	1	38	1	588		977	977	977														752b3971131f3206662b5e22da3b23aa_5111
J7620_09830		hypothetical protein	1	1	1	1	2953	1	742		452	452	452														752b3971131f3206662b5e22da3b23aa_7795
J7620_09840		hypothetical protein	1	1	1	1	2942	1	744		413	413	413														752b3971131f3206662b5e22da3b23aa_7803
J7620_09855		hypothetical protein	1	1	1	1	2990	1	791		800	800	800														752b3971131f3206662b5e22da3b23aa_7815
J7620_09865		hypothetical protein	1	1	1	1	2992	1	793		209	209	209														752b3971131f3206662b5e22da3b23aa_7822
J7620_09870		hypothetical protein	1	1	1	1	2993	1	794		701	701	701														752b3971131f3206662b5e22da3b23aa_7826
J7620_09960		hypothetical protein	1	1	1	21	2	80	1	Investigate	770	770	770														752b3971131f3206662b5e22da3b23aa_7889
J7620_09985		hypothetical protein	1	1	1	7	3	59	3		170	170	170														752b3971131f3206662b5e22da3b23aa_7906
J7620_10040		hypothetical protein	1	1	1	15	2	70	2	Investigate	260	260	260														752b3971131f3206662b5e22da3b23aa_7950
J7620_10065		hypothetical protein	1	1	1	26	1	92	1	Investigate	602	602	602														752b3971131f3206662b5e22da3b23aa_7970
J7624_00005		hypothetical protein	1	1	1	1	1758	1	1251		257	257	257																03da1bd30b32560bef8e38ea7761d9fe_3
J7624_00010		hypothetical protein	1	1	1	1	1759	1	1252		431	431	431																03da1bd30b32560bef8e38ea7761d9fe_7
J7624_00015		hypothetical protein	1	1	1	1	1760	1	1253		914	914	914																03da1bd30b32560bef8e38ea7761d9fe_11
J7624_00085		hypothetical protein	1	1	1	1	1811	1	1263		851	851	851																03da1bd30b32560bef8e38ea7761d9fe_67
J7624_00090		hypothetical protein	1	1	1	1	2473	1	957		1430	1430	1430																03da1bd30b32560bef8e38ea7761d9fe_71
J7624_02540		hypothetical protein	1	1	1	1	793	1	302		2333	2333	2333																03da1bd30b32560bef8e38ea7761d9fe_2025
J7624_07590		hypothetical protein	1	1	1	1	2515	1	91		776	776	776																03da1bd30b32560bef8e38ea7761d9fe_6032
J7624_07615		hypothetical protein	1	1	1	1	1485	1	1857		875	875	875																03da1bd30b32560bef8e38ea7761d9fe_6052
J7624_07675		hypothetical protein	1	1	1	1	2152	1	9		224	224	224																03da1bd30b32560bef8e38ea7761d9fe_6098
J7624_09475		hypothetical protein	1	1	1	1	2419	1	1769		494	494	494																03da1bd30b32560bef8e38ea7761d9fe_7515
J7624_09520		hypothetical protein	1	1	1	1	2438	1	73		266	266	266																03da1bd30b32560bef8e38ea7761d9fe_7551
J7624_09525		hypothetical protein	1	1	1	1	2439	1	72		713	713	713																03da1bd30b32560bef8e38ea7761d9fe_7555
J7624_09530		hypothetical protein	1	1	1	1	2440	1	1741		1187	1187	1187																03da1bd30b32560bef8e38ea7761d9fe_7559
J7624_09725		hypothetical protein	1	1	1	1	539	1	105		488	488	488																03da1bd30b32560bef8e38ea7761d9fe_7714
J7624_09740		hypothetical protein	1	1	1	1	542	1	102		497	497	497																03da1bd30b32560bef8e38ea7761d9fe_7726
J7624_09755		hypothetical protein	1	1	1	1	545	1	99		1067	1067	1067																03da1bd30b32560bef8e38ea7761d9fe_7737
J7624_09765		hypothetical protein	1	1	1	1	547	1	197		482	482	482																03da1bd30b32560bef8e38ea7761d9fe_7744
J7624_10055		hypothetical protein	1	1	1	1	2166	1	1824		245	245	245																03da1bd30b32560bef8e38ea7761d9fe_7970
J7624_10065		hypothetical protein	1	1	1	1	2168	1	13		314	314	314																03da1bd30b32560bef8e38ea7761d9fe_7978
J7624_10070		hypothetical protein	1	1	1	1	2373	1	14		473	473	473																03da1bd30b32560bef8e38ea7761d9fe_7982
B143_RS09910		hypothetical protein	1	1	1	1	2930	1	721		149	149	149																	c648bd7c3a222aa51bed3e3836bcf8c8_755
B143_RS0101190		hypothetical protein	1	1	1	1	2545	163	1		461	461	461																	c648bd7c3a222aa51bed3e3836bcf8c8_927
B143_RS0101845		hypothetical protein	1	1	1	1	1945	1	1107		749	749	749																	c648bd7c3a222aa51bed3e3836bcf8c8_1443
B143_RS0101850		hypothetical protein	1	1	1	1	1946	1	1106		629	629	629																	c648bd7c3a222aa51bed3e3836bcf8c8_1447
B143_RS0102515		hypothetical protein	1	1	1	1	1778	1	1242		365	365	365																	c648bd7c3a222aa51bed3e3836bcf8c8_1972
B143_RS0102555		hypothetical protein	1	1	1	1	1772	1	1246		722	722	722																	c648bd7c3a222aa51bed3e3836bcf8c8_2000
B143_RS0102565		hypothetical protein	1	1	1	1	1769	1	1282		1409	1409	1409																	c648bd7c3a222aa51bed3e3836bcf8c8_2008
B143_RS0103855		hypothetical protein	1	1	1	1	657	274	1		815	815	815																	c648bd7c3a222aa51bed3e3836bcf8c8_2996
B143_RS0104425		hypothetical protein	1	1	1	1	1259	5	3		482	482	482																	c648bd7c3a222aa51bed3e3836bcf8c8_3450
B143_RS0106095		hypothetical protein	1	1	1	1	3528	14	3		614	614	614																	c648bd7c3a222aa51bed3e3836bcf8c8_4782
B143_RS09940		hypothetical protein	1	1	1	1	2999	290	1		212	212	212																	c648bd7c3a222aa51bed3e3836bcf8c8_6321
B9T21_00340		hypothetical protein	1	1	1	1	691	270	1		209	209	209																		B9T21_00340.p01
B9T21_00390		hypothetical protein	1	1	1	1	689	8	2		854	854	854																		B9T21_00390.p01
B9T21_02880		hypothetical protein	1	1	1	1	137	56	2		203	203	203																		B9T21_02880.p01
B9T21_03260		hypothetical protein	1	1	1	1	110	266	1		395	395	395																		B9T21_03260.p01
B9T21_03500		hypothetical protein	1	1	1	1	72	1	639		722	722	722																		B9T21_03500.p01
B9T21_03505		hypothetical protein	1	1	1	1	71	1	638		968	968	968																		B9T21_03505.p01
B9T21_03520		hypothetical protein	1	1	1	1	70	1	668		1265	1265	1265																		B9T21_03520.p01
B9T21_03525		hypothetical protein	1	1	1	1	81	1	667		1085	1085	1085																		B9T21_03525.p01
B9T21_03530		hypothetical protein	1	1	1	1	82	1	666		1070	1070	1070																		B9T21_03530.p01
B9T21_04190		hypothetical protein	1	1	1	1	3624	2	25		2297	2297	2297																		B9T21_04190.p01
B9T21_04195		hypothetical protein	1	1	1	1	3623	2	24		596	596	596																		B9T21_04195.p01
B9T21_04205		hypothetical protein	1	1	1	1	3621	2	8		965	965	965																		B9T21_04205.p01
B9T21_04215		hypothetical protein	1	1	1	1	3619	2	10		350	350	350																		B9T21_04215.p01
B9T21_04220		hypothetical protein	1	1	1	1	382	2	11		1346	1346	1346																		B9T21_04220.p01
B9T21_04225		hypothetical protein	1	1	1	1	383	2	12		596	596	596																		B9T21_04225.p01
B9T21_04240		hypothetical protein	1	1	1	1	3608	2	6		788	788	788																		B9T21_04240.p01
B9T21_04245		hypothetical protein	1	1	1	1	3607	2	5		686	686	686																		B9T21_04245.p01
B9T21_06460		hypothetical protein	1	1	1	1	1108	66	1		461	461	461																		B9T21_06460.p01
B9T21_06465		hypothetical protein	1	1	1	1	1107	66	2		446	446	446																		B9T21_06465.p01
B9T21_06470		hypothetical protein	1	1	1	1	1106	66	3		419	419	419																		B9T21_06470.p01
B9T21_06495		hypothetical protein	1	1	1	1	1124	64	1		1544	1544	1544																		B9T21_06495.p01
B9T21_06505		hypothetical protein	1	1	1	1	1126	64	3		1067	1067	1067																		B9T21_06505.p01
B9T21_06605		hypothetical protein	1	1	1	1	2465	1	88		440	440	440																		B9T21_06605.p01
B9T21_06610		hypothetical protein	1	1	1	1	2466	1	87		584	584	584																		B9T21_06610.p01
B9T21_06615		hypothetical protein	1	1	1	1	2467	1	86		332	332	332																		B9T21_06615.p01
B9T21_07465		hypothetical protein	1	1	1	1	2651	4	7		602	602	602																		B9T21_07465.p01
B9T21_07470		hypothetical protein	1	1	1	1	2652	4	6		1151	1151	1151																		B9T21_07470.p01
B9T21_07845		hypothetical protein	1	1	1	1	2680	11	1		1862	1862	1862																		B9T21_07845.p01
B9T21_07850		hypothetical protein	1	1	1	1	2681	11	2		221	221	221																		B9T21_07850.p01
B9T21_07865		hypothetical protein	1	1	1	1	2682	108	2		230	230	230																		B9T21_07865.p01
B9T21_08665		hypothetical protein	1	1	1	1	3065	103	2		1286	1286	1286																		B9T21_08665.p01
B9T21_08820		hypothetical protein	1	1	1	1	2274	1	1693		1289	1289	1289																		B9T21_08820.p01
B9T21_08830		hypothetical protein	1	1	1	1	3264	1	1008		215	215	215																		B9T21_08830.p01
B9T21_09035		hypothetical protein	1	1	1	1	3313	1	1052		2147	2147	2147																		B9T21_09035.p01
B9T21_09040		hypothetical protein	1	1	1	1	3314	1	1051		1076	1076	1076																		B9T21_09040.p01
B9T21_09770		hypothetical protein	1	1	1	1	2978	1	852		329	329	329																		B9T21_09770.p01
B9T21_09920		hypothetical protein	1	1	1	1	1438	1	1814		359	359	359																		B9T21_09920.p01
B9T21_09945		hypothetical protein	1	1	1	1	1413	1	1625		479	479	479																		B9T21_09945.p01
B9T21_09950		hypothetical protein	1	1	1	1	1412	1	1626		875	875	875																		B9T21_09950.p01
BMY_0006		hypothetical protein	1	1	1	1	1409	1	1640		194	194	194		BMY_0006.p01
B9T11_04885		hypothetical protein	1	1	1	1	2393	1	18		344	344	344																					B9T11_04885.p01
B9T11_04890		hypothetical protein	1	1	1	1	2387	1	17		878	878	878																					B9T11_04890.p01
B9T11_05055		hypothetical protein	1	1	1	1	1475	1	1630		1253	1253	1253																					B9T11_05055.p01
B9T11_05080		hypothetical protein	1	1	1	1	1482	1	1644		203	203	203																					B9T11_05080.p01
B9T11_05100		hypothetical protein	1	1	1	1	1493	1	90		830	830	830																					B9T11_05100.p01
B9T11_05105		hypothetical protein	1	1	1	1	1492	1	89		350	350	350																					B9T11_05105.p01
B9T11_05110		hypothetical protein	1	1	1	1	2468	1	94		488	488	488																					B9T11_05110.p01
B9T11_05115		hypothetical protein	1	1	1	1	2469	1	95		350	350	350																					B9T11_05115.p01
B9T11_07735		hypothetical protein	1	1	1	1	511	1	218		1235	1235	1235																					B9T11_07735.p01
B9T11_07795		hypothetical protein	1	1	1	1	2415	1	1760		1712	1712	1712																					B9T11_07795.p01
B9T11_07800		hypothetical protein	1	1	1	1	2414	1	1759		1025	1025	1025																					B9T11_07800.p01
B9T11_08635		hypothetical protein	1	1	1	1	1790	1	1288		236	236	236																					B9T11_08635.p01
B9T11_08640		hypothetical protein	1	1	1	1	1791	1	1289		206	206	206																					B9T11_08640.p01
B9T11_08675		hypothetical protein	1	1	1	1	1782	1	1313		392	392	392																					B9T11_08675.p01
B9T11_08785		hypothetical protein	1	1	1	1	483	1	342		1130	1130	1130																					B9T11_08785.p01
B9T11_08795		hypothetical protein	1	1	1	1	3404	1	338		680	680	680																					B9T11_08795.p01
B9T11_08800		hypothetical protein	1	1	1	1	3403	1	337		1160	1160	1160																					B9T11_08800.p01
B9T11_08805		hypothetical protein	1	1	1	1	3402	1	336		974	974	974																					B9T11_08805.p01
B9T11_08810		hypothetical protein	1	1	1	1	3401	1	335		1235	1235	1235																					B9T11_08810.p01
B9T11_08815		hypothetical protein	1	1	1	1	3400	1	334		1340	1340	1340																					B9T11_08815.p01
B9T11_08855		hypothetical protein	1	1	1	1	3066	234	1		3305	3305	3305																					B9T11_08855.p01
B9T11_10095		hypothetical protein	1	1	1	1	2215	1	870		1139	1139	1139																					B9T11_10095.p01
B9T11_10100		hypothetical protein	1	1	1	1	2216	1	871		1232	1232	1232																					B9T11_10100.p01
B9T11_10105		hypothetical protein	1	1	1	1	2217	1	872		749	749	749																					B9T11_10105.p01
B9T11_10120		hypothetical protein	1	1	1	1	2220	1	875		809	809	809																					B9T11_10120.p01
B9T11_10125		hypothetical protein	1	1	1	1	2221	1	876		1073	1073	1073																					B9T11_10125.p01
B9T11_10180		hypothetical protein	1	1	1	1	3252	1	783		179	179	179																					B9T11_10180.p01
B9T11_10210		hypothetical protein	1	1	1	1	2085	1	495		539	539	539																					B9T11_10210.p01
B9T11_10215		hypothetical protein	1	1	1	1	2084	1	494		665	665	665																					B9T11_10215.p01
B9T12_01900		hypothetical protein	1	1	1	1	1689	1	162		200	200	200																						B9T12_01900.p01
B9T12_03305		hypothetical protein	1	1	1	1	1972	1	1261		242	242	242																						B9T12_03305.p01
B9T12_03555		hypothetical protein	1	1	1	1	2676	132	1		1310	1310	1310																						B9T12_03555.p01
B9T12_04285		hypothetical protein	1	1	1	1	2252	1	714		2477	2477	2477																						B9T12_04285.p01
B9T12_04290		hypothetical protein	1	1	1	1	2251	1	715		998	998	998																						B9T12_04290.p01
B9T12_04620		hypothetical protein	1	1	1	1	1399	1	1917		1088	1088	1088																						B9T12_04620.p01
B9T12_04670		hypothetical protein	1	1	1	1	2154	1	1903		470	470	470																						B9T12_04670.p01
B9T12_04685		hypothetical protein	1	1	1	1	2155	1	1835		812	812	812																						B9T12_04685.p01
B9T12_04710		hypothetical protein	1	1	1	1	2362	1	61		899	899	899																						B9T12_04710.p01
B9T12_04715		hypothetical protein	1	1	1	1	2361	1	62		488	488	488																						B9T12_04715.p01
B9T12_04720		hypothetical protein	1	1	1	1	2360	1	63		215	215	215																						B9T12_04720.p01
B9T12_04725		hypothetical protein	1	1	1	1	2359	1	64		257	257	257																						B9T12_04725.p01
B9T12_04850		hypothetical protein	1	1	1	1	2401	1	21		1373	1373	1373																						B9T12_04850.p01
B9T12_04855		hypothetical protein	1	1	1	1	484	1	20		569	569	569																						B9T12_04855.p01
B9T12_04890		hypothetical protein	1	1	1	1	528	1	202		299	299	299																						B9T12_04890.p01
B9T12_05090		hypothetical protein	1	1	1	1	734	1	251		2993	2993	2993																						B9T12_05090.p01
B9T12_06515		hypothetical protein	1	1	1	1	12	1	566		1172	1172	1172																						B9T12_06515.p01
B9T12_06520		hypothetical protein	1	1	1	1	13	1	565		1133	1133	1133																						B9T12_06520.p01
B9T12_06525		hypothetical protein	1	1	1	1	14	1	564		1166	1166	1166																						B9T12_06525.p01
B9T12_06530		hypothetical protein	1	1	1	1	15	1	563		1244	1244	1244																						B9T12_06530.p01
B9T12_08485		hypothetical protein	1	1	1	1	3174	255	1		1076	1076	1076																						B9T12_08485.p01
B9T12_08970		hypothetical protein	1	1	1	1	3199	35	11		320	320	320																						B9T12_08970.p01
B9T12_08975		hypothetical protein	1	1	1	1	3200	35	10		2072	2072	2072																						B9T12_08975.p01
B9T12_08980		hypothetical protein	1	1	1	1	3201	35	9		1913	1913	1913																						B9T12_08980.p01
B9T12_08985		hypothetical protein	1	1	1	1	3202	35	8		2000	2000	2000																						B9T12_08985.p01
B9T12_08990		hypothetical protein	1	1	1	1	3203	35	7		671	671	671																						B9T12_08990.p01
B9T12_08995		hypothetical protein	1	1	1	1	3204	35	6		1103	1103	1103																						B9T12_08995.p01
B9T12_09000		hypothetical protein	1	1	1	1	3205	35	5		1880	1880	1880																						B9T12_09000.p01
B9T12_09005		hypothetical protein	1	1	1	1	3206	35	4		929	929	929																						B9T12_09005.p01
B9T12_09010		hypothetical protein	1	1	1	1	3207	35	3		1910	1910	1910																						B9T12_09010.p01
B9T12_09015		hypothetical protein	1	1	1	1	3208	35	2		590	590	590																						B9T12_09015.p01
B9T12_09020		hypothetical protein	1	1	1	1	3209	35	1		890	890	890																						B9T12_09020.p01
B9T12_09670		hypothetical protein	1	1	1	1	3442	1	365		191	191	191																						B9T12_09670.p01
B9T12_09700		hypothetical protein	1	1	1	1	3414	1	888		695	695	695																						B9T12_09700.p01
B9T12_09705		hypothetical protein	1	1	1	1	3415	1	889		1712	1712	1712																						B9T12_09705.p01
B9T12_09710		hypothetical protein	1	1	1	1	3416	1	890		1139	1139	1139																						B9T12_09710.p01
B9T12_09715		hypothetical protein	1	1	1	1	3417	1	891		407	407	407																						B9T12_09715.p01
B9T18_00665		hypothetical protein	1	1	1	1	2647	300	1		284	284	284																							B9T18_00665.p01
B9T18_00985		hypothetical protein	1	1	1	1	2918	1	408		1097	1097	1097																							B9T18_00985.p01
B9T18_01005		hypothetical protein	1	1	1	1	2926	1	395		2024	2024	2024																							B9T18_01005.p01
B9T18_01315		hypothetical protein	1	1	1	1	2472	1	93		881	881	881																							B9T18_01315.p01
B9T18_01340		hypothetical protein	1	1	1	1	1427	1	1858		605	605	605																							B9T18_01340.p01
B9T18_01345		hypothetical protein	1	1	1	1	1428	1	1859		1211	1211	1211																							B9T18_01345.p01
B9T18_01515		hypothetical protein	1	1	1	1	2412	1	1761		752	752	752																							B9T18_01515.p01
B9T18_01520		hypothetical protein	1	1	1	1	2411	1	1762		794	794	794																							B9T18_01520.p01
B9T18_01660		hypothetical protein	1	1	1	1	1776	1	1309		473	473	473																							B9T18_01660.p01
B9T18_01695		hypothetical protein	1	1	1	1	1788	1	1291		1271	1271	1271																							B9T18_01695.p01
B9T18_01760		hypothetical protein	1	1	1	1	1810	1	960		866	866	866																							B9T18_01760.p01
B9T18_01765		hypothetical protein	1	1	1	1	2474	1	961		587	587	587																							B9T18_01765.p01
B9T18_01770		hypothetical protein	1	1	1	1	2475	1	962		776	776	776																							B9T18_01770.p01
B9T18_01785		hypothetical protein	1	1	1	1	2481	1	985		1241	1241	1241																							B9T18_01785.p01
B9T18_01880		hypothetical protein	1	1	1	1	2275	1	1688		1325	1325	1325																							B9T18_01880.p01
B9T18_02995		hypothetical protein	1	1	1	1	606	1	173		3812	3812	3812																							B9T18_02995.p01
B9T18_04235		hypothetical protein	1	1	1	1	660	13	3		776	776	776																							B9T18_04235.p01
B9T18_06910		hypothetical protein	1	1	1	1	84	1	678		1136	1136	1136																							B9T18_06910.p01
B9T18_06915		hypothetical protein	1	1	1	1	83	1	679		1202	1202	1202																							B9T18_06915.p01
B9T18_06920		hypothetical protein	1	1	1	1	97	1	680		890	890	890																							B9T18_06920.p01
F387_01974		Hypothetical protein	1	1	1	1	2140	1	1870		215	215	215																									F387_01974.p01
B9T18_06940		hypothetical protein	1	1	1	1	311	1	602		833	833	833																							B9T18_06940.p01
B9T18_07750		hypothetical protein	1	1	1	1	808	1	321		2138	2138	2138																							B9T18_07750.p01
B9T18_09040		hypothetical protein	1	1	1	1	1119	259	1		521	521	521																							B9T18_09040.p01
B9T18_09440		hypothetical protein	1	1	1	1	3176	39	9		494	494	494																							B9T18_09440.p01
B9T18_09445		hypothetical protein	1	1	1	1	3177	39	8		815	815	815																							B9T18_09445.p01
B9T18_09450		hypothetical protein	1	1	1	1	3178	39	7		701	701	701																							B9T18_09450.p01
B9T18_09455		hypothetical protein	1	1	1	1	3179	39	6		596	596	596																							B9T18_09455.p01
B9T18_09460		hypothetical protein	1	1	1	1	3180	39	5		1157	1157	1157																							B9T18_09460.p01
B9T18_09465		hypothetical protein	1	1	1	1	3181	39	4		497	497	497																							B9T18_09465.p01
B9T18_09470		hypothetical protein	1	1	1	1	3182	39	3		233	233	233																							B9T18_09470.p01
B9T18_09475		hypothetical protein	1	1	1	1	3183	39	2		1256	1256	1256																							B9T18_09475.p01
B9T18_09480		hypothetical protein	1	1	1	1	3184	39	1		578	578	578																							B9T18_09480.p01
B9T13_01950		hypothetical protein	1	1	1	1	621	1	1400		221	221	221																								B9T13_01950.p01
B9T13_01955		hypothetical protein	1	1	1	1	622	1	1399		230	230	230																								B9T13_01955.p01
B9T13_01990		hypothetical protein	1	1	1	1	618	1	1395		179	179	179																								B9T13_01990.p01
B9T13_02810		hypothetical protein	1	1	1	1	2328	1	1764		647	647	647																								B9T13_02810.p01
B9T13_02815		hypothetical protein	1	1	1	1	2329	1	1765		500	500	500																								B9T13_02815.p01
B9T13_02850		hypothetical protein	1	1	1	1	2336	1	1781		473	473	473																								B9T13_02850.p01
B9T13_02930		hypothetical protein	1	1	1	1	2153	1	1902		725	725	725																								B9T13_02930.p01
B9T13_02990		hypothetical protein	1	1	1	1	1486	1	1860		470	470	470																								B9T13_02990.p01
B9T13_04210		hypothetical protein	1	1	1	1	307	1	608		1256	1256	1256																								B9T13_04210.p01
B9T13_04220		hypothetical protein	1	1	1	1	305	1	606		1196	1196	1196																								B9T13_04220.p01
B9T13_04590		hypothetical protein	1	1	1	1	369	34	11		1193	1193	1193																								B9T13_04590.p01
B9T13_04600		hypothetical protein	1	1	1	1	371	34	9		224	224	224																								B9T13_04600.p01
B9T13_04605		hypothetical protein	1	1	1	1	372	34	8		632	632	632																								B9T13_04605.p01
B9T13_04610		hypothetical protein	1	1	1	1	373	34	7		1448	1448	1448																								B9T13_04610.p01
B9T13_04615		hypothetical protein	1	1	1	1	374	34	6		359	359	359																								B9T13_04615.p01
B9T13_04620		hypothetical protein	1	1	1	1	375	34	5		521	521	521																								B9T13_04620.p01
B9T13_04625		hypothetical protein	1	1	1	1	376	34	4		242	242	242																								B9T13_04625.p01
B9T13_04630		hypothetical protein	1	1	1	1	377	34	3		290	290	290																								B9T13_04630.p01
B9T13_04635		hypothetical protein	1	1	1	1	378	34	2		218	218	218																								B9T13_04635.p01
B9T13_04640		hypothetical protein	1	1	1	1	379	34	1		536	536	536																								B9T13_04640.p01
B9T13_07755		hypothetical protein	1	1	1	1	2445	1	1677		248	248	248																								B9T13_07755.p01
B9T13_07765		hypothetical protein	1	1	1	1	2452	1	1675		2438	2438	2438																								B9T13_07765.p01
B9T13_07770		hypothetical protein	1	1	1	1	2453	1	1674		218	218	218																								B9T13_07770.p01
B9T13_07775		hypothetical protein	1	1	1	1	2454	1	1673		470	470	470																								B9T13_07775.p01
B9T13_07780		hypothetical protein	1	1	1	1	2455	1	1672		242	242	242																								B9T13_07780.p01
B9T13_07785		hypothetical protein	1	1	1	1	2456	1	1671		509	509	509																								B9T13_07785.p01
B9T13_07790		hypothetical protein	1	1	1	1	2457	1	1670		1109	1109	1109																								B9T13_07790.p01
B9T13_09920		hypothetical protein	1	1	1	1	2358	1	1801		254	254	254																								B9T13_09920.p01
B9T13_10070		hypothetical protein	1	1	1	1	494	1	118		3314	3314	3314																								B9T13_10070.p01
B9T13_10075		hypothetical protein	1	1	1	1	495	1	117		827	827	827																								B9T13_10075.p01
B9T13_10080		hypothetical protein	1	1	1	1	496	1	116		1064	1064	1064																								B9T13_10080.p01
B9T13_10085		hypothetical protein	1	1	1	1	497	1	115		422	422	422																								B9T13_10085.p01
B9T13_10090		hypothetical protein	1	1	1	1	498	1	114		1250	1250	1250																								B9T13_10090.p01
B9T13_10205		hypothetical protein	1	1	1	1	2078	1	478		1214	1214	1214																								B9T13_10205.p01
F387_00915		Hypothetical protein	1	1	1	1	1238	256	1		86	86	86																									F387_00915.p01
F387_00921		Hypothetical protein	1	1	1	1	1245	15	2		77	77	77																									F387_00921.p01
F387_00999		Hypothetical protein	1	1	1	1	661	156	1		65	65	65																									F387_00999.p01
F387_00040		Hypothetical protein	1	1	1	1	1552	1	1544		176	176	176																									F387_00040.p01
F387_00101		Hypothetical protein	1	1	1	1	628	1	158		83	83	83																									F387_00101.p01
F387_00222		Hypothetical protein	1	1	1	1	1745	1	1347		86	86	86																									F387_00222.p01
F387_00262		Hypothetical protein	1	1	1	1	1858	1	1204		59	59	59																									F387_00262.p01
F387_00286		Hypothetical protein	1	1	1	1	569	1	182		1025	1025	1025																									F387_00286.p01
F387_00287		Hypothetical protein	1	1	1	1	568	1	183		923	923	923																									F387_00287.p01
F387_00288		Hypothetical protein	1	1	1	1	1884	1	184		2471	2471	2471																									F387_00288.p01
F387_00320		Hypothetical protein	1	1	1	1	566	1	186		77	77	77																									F387_00320.p01
F387_01170		Hypothetical protein	1	1	1	1	1981	1	1705		1013	1013	1013																									F387_01170.p01
F387_01172		Hypothetical protein	1	1	1	1	1982	1	1706		215	215	215																									F387_01172.p01
F387_01177		Hypothetical protein	1	1	1	1	2442	1	1651		128	128	128																									F387_01177.p01
F387_01190		Hypothetical protein	1	1	1	1	2532	43	3		2468	2468	2468																									F387_01190.p01
F387_01191		Hypothetical protein	1	1	1	1	2531	43	4		299	299	299																									F387_01191.p01
F387_01192		Hypothetical protein	1	1	1	1	2530	43	5		140	140	140																									F387_01192.p01
F387_01193		Hypothetical protein	1	1	1	1	2529	43	6		470	470	470																									F387_01193.p01
F387_01194		Hypothetical protein	1	1	1	1	2528	43	7		185	185	185																									F387_01194.p01
F387_01195		Hypothetical protein	1	1	1	1	2527	43	8		716	716	716																									F387_01195.p01
F387_01754		Hypothetical protein	1	1	1	1	2866	6	23		1214	1214	1214																									F387_01754.p01
F387_01755		Hypothetical protein	1	1	1	1	2865	6	24		4733	4733	4733																									F387_01755.p01
F387_01756		Hypothetical protein	1	1	1	1	2624	6	25		1253	1253	1253																									F387_01756.p01
F387_01757		Hypothetical protein	1	1	1	1	2625	6	26		611	611	611																									F387_01757.p01
F387_00484		Hypothetical protein	1	1	1	1	718	113	1		83	83	83																									F387_00484.p01
F387_00485		Hypothetical protein	1	1	1	1	983	113	2		119	119	119																									F387_00485.p01
F387_00489		Hypothetical protein	1	1	1	1	978	10	2		134	134	134																									F387_00489.p01
F387_00651		Hypothetical protein	1	1	1	1	3483	226	1		128	128	128																									F387_00651.p01
F387_00731		Hypothetical protein	1	1	1	1	3569	51	2		110	110	110																									F387_00731.p01
F387_01231		Hypothetical protein	1	1	1	1	3088	244	1		119	119	119																									F387_01231.p01
F387_01367		Hypothetical protein	1	1	1	1	216	134	1		95	95	95																									F387_01367.p01
F387_01431		Hypothetical protein	1	1	1	1	281	202	1		116	116	116																									F387_01431.p01
F387_01450		Hypothetical protein	1	1	1	1	61	1	604		155	155	155																									F387_01450.p01
F387_01451		Hypothetical protein	1	1	1	1	60	1	603		662	662	662																									F387_01451.p01
F387_01453		Hypothetical protein	1	1	1	1	58	1	611		1040	1040	1040																									F387_01453.p01
F387_01499		Hypothetical protein	1	1	1	1	3718	25	3		1451	1451	1451																									F387_01499.p01
F387_01523		Hypothetical protein	1	1	1	1	363	27	5		833	833	833																									F387_01523.p01
F387_01678		Hypothetical protein	1	1	1	1	2841	41	5		116	116	116																									F387_01678.p01
F387_01782		Hypothetical protein	1	1	1	1	762	287	1		137	137	137																									F387_01782.p01
F387_01819		Hypothetical protein	1	1	1	1	828	1	268		182	182	182																									F387_01819.p01
F387_01826		Hypothetical protein	1	1	1	1	831	1	278		200	200	200																									F387_01826.p01
F387_01950		Hypothetical protein	1	1	1	1	2076	1	476		1163	1163	1163																									F387_01950.p01
F387_01952		Hypothetical protein	1	1	1	1	2080	1	481		233	233	233																									F387_01952.p01
F387_01953		Hypothetical protein	1	1	1	1	2081	1	482		1256	1256	1256																									F387_01953.p01
F387_01954		Hypothetical protein	1	1	1	1	2082	1	483		578	578	578																									F387_01954.p01
F387_01961		Hypothetical protein	1	1	1	1	2095	1	735		392	392	392																									F387_01961.p01
F387_01963		Hypothetical protein	1	1	1	1	2097	1	505		851	851	851																									F387_01963.p01
J7558_10140		hypothetical protein	1	1	1	35	1	114	1	Investigate	328	328	328			a04b031c37c06570dd644ef46d09ac8c_8038
F387_01964		Hypothetical protein	1	1	1	1	2098	1	506		545	545	545																									F387_01964.p01
F387_01970		Hypothetical protein	1	1	1	1	2088	1	500		362	362	362																									F387_01970.p01
F387_01971		Hypothetical protein	1	1	1	1	2087	1	499		488	488	488																									F387_01971.p01
F387_01988		Hypothetical protein	1	1	1	1	2944	1	756		134	134	134																									F387_01988.p01
F387_01993		Hypothetical protein	1	1	1	1	3214	1	780		377	377	377																									F387_01993.p01
F387_01995		Hypothetical protein	1	1	1	1	3216	1	782		401	401	401																									F387_01995.p01
F387_01977		Hypothetical protein	1	1	1	1	2143	1	1873		539	539	539																									F387_01977.p01
F387_01978		Hypothetical protein	1	1	1	1	2144	1	1874		368	368	368																									F387_01978.p01
F387_01979		Hypothetical protein	1	1	1	1	2145	1	1875		254	254	254																									F387_01979.p01
F387_01980		Hypothetical protein	1	1	1	1	2146	1	1876		449	449	449																									F387_01980.p01
F387_01981		Hypothetical protein	1	1	1	1	2147	1	1877		509	509	509																									F387_01981.p01
F387_01982		Hypothetical protein	1	1	1	1	2148	1	1878		920	920	920																									F387_01982.p01
F387_01983		Hypothetical protein	1	1	1	1	2149	1	1879		413	413	413																									F387_01983.p01
F387_02033		Hypothetical protein	1	1	1	2	4	46	3		320	320	320																									F387_02033.p01
F387_02037		Hypothetical protein	1	1	1	2	1	46	1		128	128	128																									F387_02037.p01
F387_02041		Hypothetical protein	1	1	1	1	2039	1	469		377	377	377																									F387_02041.p01
A6V30_10275		hypothetical protein	1	1	1	1	2131	1	807		902	902	902																										A6V30_10275.p01
F387_02043		Hypothetical protein	1	1	1	1	2033	1	462		269	269	269																									F387_02043.p01
F387_02053		Hypothetical protein	1	1	1	1	3247	1	860		170	170	170																									F387_02053.p01
A6V30_02690		hypothetical protein	1	1	1	1	652	1	142		662	662	662																										A6V30_02690.p01
A6V30_04875		hypothetical protein	1	1	1	1	2300	1	1736		1688	1688	1688																										A6V30_04875.p01
A6V30_04890		hypothetical protein	1	1	1	1	1985	1	1698		1712	1712	1712																										A6V30_04890.p01
A6V30_04910		hypothetical protein	1	1	1	1	2308	1	1662		188	188	188																										A6V30_04910.p01
A6V30_04955		hypothetical protein	1	1	1	1	2509	1	969		1175	1175	1175																										A6V30_04955.p01
A6V30_04970		hypothetical protein	1	1	1	1	2476	1	958		377	377	377																										A6V30_04970.p01
A6V30_10005		hypothetical protein	1	1	1	1	3262	1	740		362	362	362																										A6V30_10005.p01
A6V30_10060		hypothetical protein	1	1	1	1	2224	1	725		536	536	536																										A6V30_10060.p01
A6V30_10140		hypothetical protein	1	1	1	1	2058	1	463		338	338	338																										A6V30_10140.p01
A6V30_10245		hypothetical protein	1	1	1	1	2136	1	488		338	338	338																										A6V30_10245.p01
A6V30_10145		hypothetical protein	1	1	1	1	2057	1	464		584	584	584																										A6V30_10145.p01
A6V30_10250		hypothetical protein	1	1	1	1	2135	1	487		584	584	584																										A6V30_10250.p01
A6V30_10175		hypothetical protein	1	1	1	1	2036	1	451		338	338	338																										A6V30_10175.p01
A6V30_10280		hypothetical protein	1	1	1	1	2100	1	808		338	338	338																										A6V30_10280.p01
A6V30_10205		hypothetical protein	1	1	1	1	2072	1	474		512	512	512																										A6V30_10205.p01
A6V30_10310		hypothetical protein	1	1	1	1	2106	1	814		512	512	512																										A6V30_10310.p01
A6V30_10210		hypothetical protein	1	1	1	1	2071	1	473		788	788	788																										A6V30_10210.p01
A6V30_10315		hypothetical protein	1	1	1	1	2107	1	815		788	788	788																										A6V30_10315.p01
A6V30_10220		hypothetical protein	1	1	1	1	2069	1	1881		188	188	188																										A6V30_10220.p01
A6V30_10325		hypothetical protein	1	1	1	1	2109	1	817		188	188	188																										A6V30_10325.p01
A6V30_10240		hypothetical protein	1	1	1	1	2137	1	489		995	995	995																										A6V30_10240.p01
A6V30_10350		hypothetical protein	1	1	1	1	2933	1	535		224	224	224																										A6V30_10350.p01
A6V30_10355		hypothetical protein	1	1	1	1	2934	1	536		590	590	590																										A6V30_10355.p01
A6V30_06725		hypothetical protein	1	1	1	1	2593	1	708		269	269	269																										A6V30_06725.p01
A6V30_06990		hypothetical protein	1	1	1	1	2271	1	1237		1148	1148	1148																										A6V30_06990.p01
A6V30_07105		hypothetical protein	1	1	1	1	1781	1	1311		404	404	404																										A6V30_07105.p01
A6V30_07135		hypothetical protein	1	1	1	1	1773	1	1250		398	398	398																										A6V30_07135.p01
A6V30_07145		hypothetical protein	1	1	1	1	1754	1	1300		572	572	572																										A6V30_07145.p01
A6V30_07150		hypothetical protein	1	1	1	1	1755	1	1299		1412	1412	1412																										A6V30_07150.p01
A6V30_07155		hypothetical protein	1	1	1	1	1756	1	1298		866	866	866																										A6V30_07155.p01
A6V30_07160		hypothetical protein	1	1	1	1	1757	1	1255		698	698	698																										A6V30_07160.p01
A6V30_07195		hypothetical protein	1	1	1	1	1817	1	1266		377	377	377																										A6V30_07195.p01
A6V30_07600		hypothetical protein	1	1	1	1	455	176	1		3302	3302	3302																										A6V30_07600.p01
A6V30_08445		hypothetical protein	1	1	1	1	26	1	579		734	734	734																										A6V30_08445.p01
A6V30_08455		hypothetical protein	1	1	1	1	24	1	581		1196	1196	1196																										A6V30_08455.p01
A6V30_08490		hypothetical protein	1	1	1	1	2244	1	695		614	614	614																										A6V30_08490.p01
A6V30_08495		hypothetical protein	1	1	1	1	2243	1	694		899	899	899																										A6V30_08495.p01
A6V30_08645		hypothetical protein	1	1	1	1	3735	137	1		1199	1199	1199																										A6V30_08645.p01
A6V30_08715		hypothetical protein	1	1	1	1	357	262	1		479	479	479																										A6V30_08715.p01
J7558_10145		hypothetical protein	1	1	1	24	1	72	1	Investigate	301	301	301			a04b031c37c06570dd644ef46d09ac8c_8042
J7558_10150		hypothetical protein	1	1	1	18	1	78	1	Investigate	310	310	310			a04b031c37c06570dd644ef46d09ac8c_8046
A6V30_07815		hypothetical protein	1	1	1	1	192	3	47		458	458	458																										A6V30_07815.p01
A6V30_07800		hypothetical protein	1	1	1	1	189	3	44		338	338	338																										A6V30_07800.p01
BMY_1576		hypothetical protein	1	1	1	1	3690	296	1		134	134	134		BMY_1576.p01
BMY_0051		hypothetical protein	1	1	1	1	1468	1	1621		155	155	155		BMY_0051.p01
BMY_2109		hypothetical protein	1	1	1	1	2290	1	1726		155	155	155		BMY_2109.p01
BMY_1804		hypothetical protein	1	1	1	1	408	1	362		788	788	788		BMY_1804.p01
BMY_0593		hypothetical protein	1	1	1	1	1988	1	1719		536	536	536		BMY_0593.p01
BMY_0594		hypothetical protein	1	1	1	1	1987	1	1718		191	191	191		BMY_0594.p01
A6V30_07870		hypothetical protein	1	1	1	1	203	3	22		347	347	347																										A6V30_07870.p01
BMY_1803		hypothetical protein	1	1	1	1	407	1	357		266	266	266		BMY_1803.p01
BMY_2116		hypothetical protein	1	1	1	1	2297	1	1733		125	125	125		BMY_2116.p01
J7602_10135		hypothetical protein	1	1	1	41	1	122	1	Investigate	467	467	467											d977e7edc1a56720a787e465ab4ce472_8032
B9T11_10270		hypothetical protein	1	1	1	12	1	115	1	Investigate	951	951	951																					B9T11_10270.p01
B9T11_08825		hypothetical protein	1	1	1	1	3398	1	332		251	251	251																					B9T11_08825.p01
J7602_10145		hypothetical protein	1	1	1	38	1	123	1	Investigate	325	325	325											d977e7edc1a56720a787e465ab4ce472_8040
BMY_1900		hypothetical protein	1	1	1	1	1180	111	1		209	209	209		BMY_1900.p01
BMY_1937		hypothetical protein	1	1	1	1	692	220	1		287	287	287		BMY_1937.p01
J7600_10150		hypothetical protein	1	1	1	39	1	126	1	Investigate	325	325	325										614e29224da4f337b8899b3142d81070_8044
J7606_10140		hypothetical protein	1	1	1	42	1	125	1	Investigate	325	325	325												e653c257947c2dd0a414de7cb159ba14_8043
BMY_0720		hypothetical protein	1	1	1	1	2832	293	1		440	440	440		BMY_0720.p01
A6V30_07770		hypothetical protein	1	1	1	1	183	3	38		932	932	932																										A6V30_07770.p01
A6V30_07205		hypothetical protein	1	1	1	1	126	3	1		1397	1397	1397																										A6V30_07205.p01
B9T12_06480		hypothetical protein	1	1	1	1	20	1	572		608	608	608																						B9T12_06480.p01
BMY_1628		hypothetical protein	1	1	1	1	381	71	2		803	803	803		BMY_1628.p01
BMY_1653		hypothetical protein	1	1	1	1	3604	2	2		425	425	425		BMY_1653.p01
BMY_0012		hypothetical protein	1	1	1	1	3387	1	351		833	833	833		BMY_0012.p01
BMY_0067		hypothetical protein	1	1	1	1	640	1	1605		833	833	833		BMY_0067.p01
BMY_2182		hypothetical protein	1	1	1	1	3219	1	774		224	224	224		BMY_2182.p01
BMY_2195		hypothetical protein	1	1	1	1	2208	1	833		224	224	224		BMY_2195.p01
BMY_2142		hypothetical protein	1	1	1	1	2913	1	414		269	269	269		BMY_2142.p01
F387_00610		Hypothetical protein	1	1	1	1	413	1	355		541	541	541																									F387_00610.p01
BMY_2068		hypothetical protein	1	1	1	1	659	229	1		170	170	170		BMY_2068.p01
BMY_0131		hypothetical protein	1	1	1	1	1565	1	149		425	425	425		BMY_0131.p01
BMY_0155		hypothetical protein	1	1	1	1	1589	1	153		272	272	272		BMY_0155.p01
BMY_0180		hypothetical protein	1	1	1	1	1612	1	1486		533	533	533		BMY_0180.p01
J7560_07775		hypothetical protein	1	1	1	1	2848	9	2		338	338	338				2cf5bec40a3ef4476bf46f509f729c16_6157
BMY_0334		hypothetical protein	1	1	1	1	1827	1	1235		197	197	197		BMY_0334.p01
BMY_0487		hypothetical protein	1	1	1	1	3338	1	1076		461	461	461		BMY_0487.p01
B9T21_10140		hypothetical protein	1	1	1	1	2312	1	15	Hypothetical protein with no hits to refseq/uniprot/clusters/cdd/tigrfams/pfam overlapping another protein with hits	302	302	302																		B9T21_10140.p01
BMY_0670		hypothetical protein	1	1	1	1	2896	217	1		1205	1205	1205		BMY_0670.p01
BMY_0777		hypothetical protein	1	1	1	1	2674	192	1		794	794	794		BMY_0777.p01
BMY_0789		hypothetical protein	1	1	1	1	2752	85	2		260	260	260		BMY_0789.p01
BMY_1663		hypothetical protein	1	1	1	1	3594	69	2		332	332	332		BMY_1663.p01
BMY_1704		hypothetical protein	1	1	1	1	3551	286	1		1190	1190	1190		BMY_1704.p01
BMY_1760		hypothetical protein	1	1	1	1	3493	129	1		284	284	284		BMY_1760.p01
B9T12_09665		hypothetical protein	1	1	1	1	3443	1	366		206	206	206																						B9T12_09665.p01
B9T10_07315		hypothetical protein	1	1	1	1	3426	1	902		230	230	230	B9T10_07315.p01
BMY_1151		hypothetical protein	1	1	1	1	817	1	289		398	398	398		BMY_1151.p01
BMY_1094		hypothetical protein	1	1	1	1	902	235	1		512	512	512		BMY_1094.p01
BMY_1237		hypothetical protein	1	1	1	1	3099	16	1		470	470	470		BMY_1237.p01
BMY_1241		hypothetical protein	1	1	1	1	3103	161	1		170	170	170		BMY_1241.p01
B9T21_09995		hypothetical protein	1	1	1	1	2370	1	12		473	473	473																		B9T21_09995.p01
BMY_0306		hypothetical protein	1	1	1	1	1731	1	172		1070	1070	1070		BMY_0306.p01
BMY_0581		hypothetical protein	1	1	1	1	1979	1	1708		698	698	698		BMY_0581.p01
BMY_0588		hypothetical protein	1	1	1	1	1980	1	1707		344	344	344		BMY_0588.p01
BMY_2085		hypothetical protein	1	1	1	1	1377	282	1		269	269	269		BMY_2085.p01
BMY_2177		hypothetical protein	1	1	1	1	3223	1	767		404	404	404		BMY_2177.p01
J7558_10120		hypothetical protein	1	1	1	8	1	95	1	Investigate	187	187	187			a04b031c37c06570dd644ef46d09ac8c_8024
J7620_09850		hypothetical protein	1	1	1	1	2989	1	790		191	191	191														752b3971131f3206662b5e22da3b23aa_7811
J7620_10060		hypothetical protein	1	1	1	6	3	60	1		191	191	191														752b3971131f3206662b5e22da3b23aa_7966
J7620_10005		hypothetical protein	1	1	1	1	2086	1	496		424	424	424														752b3971131f3206662b5e22da3b23aa_7921
A6V30_10150		hypothetical protein	1	1	1	1	2056	1	465		881	881	881																										A6V30_10150.p01
A6V30_10255		hypothetical protein	1	1	1	1	2134	1	486		881	881	881																										A6V30_10255.p01
B9T13_09945		hypothetical protein	1	1	1	1	2186	1	1885		221	221	221																								B9T13_09945.p01
B9T13_09815		hypothetical protein	1	1	1	1	503	1	217		800	800	800																								B9T13_09815.p01
B9T13_10115		hypothetical protein	1	1	1	1	490	1	109		854	854	854																								B9T13_10115.p01
J7560_06605		Ig-like domain-containing protein	1	1	1	1	2638	216	1		4610	4610	4610				2cf5bec40a3ef4476bf46f509f729c16_5233
A6V30_00280		Insertion element IS407 uncharacterized 10.0 kDa protein	2	2	1	1	722	1	277		209	209	209																									F387_01828.p01	A6V30_00280.p01
F387_01992		Insertion element IS476 uncharacterized 39.2 kDa protein	1	1	1	1	2943	1	749		236	236	236																									F387_01992.p01
A6V30_08480		Insertion element IS600 uncharacterized 31 kDa protein	3	3	1	1	2249	1	586		394	821	662													31e4ba73e5ddb8c85dea419204f0df5a_7914												F387_02046.p01	A6V30_08480.p01
BMY_0044		Insertion element ISR1 uncharacterized 10 kDa protein A3	2	2	1	1	2150	1	1884		266	266	266		BMY_0044.p01																							F387_01984.p01
J7547_07220		integrase	4	4	1	1	2636	6	3		2705	2705	2705				2cf5bec40a3ef4476bf46f509f729c16_5269	102e21fe2bbcace64a7555dd0bcc9007_5745	4a9cac2c1a817d9acdec143b653b9a80_5797																			F387_01763.p01
A6V30_10035		integrase	1	1	1	1	2051	1	846		686	686	686																										A6V30_10035.p01
BMY_2150		integrase	1	1	1	1	2905	1	422		476	476	476		BMY_2150.p01
BMY_0068		integrase	1	1	1	1	641	1	1604		434	434	434		BMY_0068.p01
BMY_0054		integrase	1	1	1	1	1465	1	1618		1250	1250	1250		BMY_0054.p01
BMY_0056		integrase	1	1	1	1	1463	1	1616		788	788	788		BMY_0056.p01
BMY_0065		integrase	1	1	1	1	638	1	1607		788	788	788		BMY_0065.p01
BMY_2168		integrase	1	1	1	1	3237	1	754		788	788	788		BMY_2168.p01
J7607_10060		integrase core domain-containing protein	3	3	1	3	1	68	1	Investigate	284	442	336					102e21fe2bbcace64a7555dd0bcc9007_7961	4a9cac2c1a817d9acdec143b653b9a80_7978							31e4ba73e5ddb8c85dea419204f0df5a_7973
J7561_09965		integrase core domain-containing protein	2	2	1	1	2961	1	448		113	113	113					102e21fe2bbcace64a7555dd0bcc9007_7870	4a9cac2c1a817d9acdec143b653b9a80_7890
J7607_04130		integrase core domain-containing protein	1	1	1	1	747	1	235		161	161	161													31e4ba73e5ddb8c85dea419204f0df5a_3272
B9T13_10195		invertase	1	1	1	1	2075	1	479		605	605	605																								B9T13_10195.p01
J7620_09805		iron ABC transporter permease	4	4	1	1	2957	1	444		460	1016	877								197b0243bc5bc4c380ecfb8919a026b1_7743						752b3971131f3206662b5e22da3b23aa_7777						B9T14_10100.p01				B9T13_10255.p01
J7622_02370		iron ABC transporter substrate-binding protein	24	24	1	1	1728	1	1364		1052	1052	1052	B9T10_02070.p01	BMY_0301.p01	a04b031c37c06570dd644ef46d09ac8c_531	2cf5bec40a3ef4476bf46f509f729c16_509		4a9cac2c1a817d9acdec143b653b9a80_1009	ac8fed72b32d7540cf9a1b9ac12df95a_790	197b0243bc5bc4c380ecfb8919a026b1_799	79ccbe49faa72747a800162f6a36c0ca_931	614e29224da4f337b8899b3142d81070_790	d977e7edc1a56720a787e465ab4ce472_803	e653c257947c2dd0a414de7cb159ba14_790	31e4ba73e5ddb8c85dea419204f0df5a_1590	752b3971131f3206662b5e22da3b23aa_935	83683a6c7ca473684645e0830a47223d_1879	03da1bd30b32560bef8e38ea7761d9fe_1073	c648bd7c3a222aa51bed3e3836bcf8c8_2137	B9T21_02060.p01	B9T15_02650.p01	B9T14_02390.p01	B9T11_00670.p01	B9T12_02080.p01	B9T18_03025.p01	B9T13_02130.p01	F387_00205.p01
J7620_10020		IS3 family transposase	7	7	1	1	401	1	372		172	252	240			a04b031c37c06570dd644ef46d09ac8c_7995	2cf5bec40a3ef4476bf46f509f729c16_7854		4a9cac2c1a817d9acdec143b653b9a80_7683	ac8fed72b32d7540cf9a1b9ac12df95a_7986	197b0243bc5bc4c380ecfb8919a026b1_7965					31e4ba73e5ddb8c85dea419204f0df5a_7955	752b3971131f3206662b5e22da3b23aa_7933
F387_02047		IS3 family transposase	4	4	1	1	2932	1	723		255	293	283													31e4ba73e5ddb8c85dea419204f0df5a_7918				c648bd7c3a222aa51bed3e3836bcf8c8_765								F387_02047.p01	A6V30_08485.p01
J7607_09850		IS3 family transposase	2	2	1	1	3233	1	440		137	443	290													31e4ba73e5ddb8c85dea419204f0df5a_7817												F387_02001.p01
J7554_09135		IS3 family transposase	2	2	1	1	3433	1	908		255	255	255				2cf5bec40a3ef4476bf46f509f729c16_7658					79ccbe49faa72747a800162f6a36c0ca_7244
J7560_09775		IS6 family transposase	6	6	1	1	2045	1	460		200	692	540		BMY_2121.p01		2cf5bec40a3ef4476bf46f509f729c16_7733					79ccbe49faa72747a800162f6a36c0ca_7501									B9T21_09700.p01	B9T15_09990.p01	B9T14_09960.p01
J7547_10065		IS6 family transposase	6	6	1	1	2982	1	760		199	686	408				2cf5bec40a3ef4476bf46f509f729c16_7835	102e21fe2bbcace64a7555dd0bcc9007_7957				79ccbe49faa72747a800162f6a36c0ca_7590					752b3971131f3206662b5e22da3b23aa_7869									B9T18_10090.p01		F387_02026.p01
J7552_09760		IS6 family transposase	4	4	1	1	2955	1	765		124	686	310		BMY_2175.p01						197b0243bc5bc4c380ecfb8919a026b1_7735						752b3971131f3206662b5e22da3b23aa_7785										B9T13_10265.p01
J7560_09795		IS6 family transposase	4	4	1	1	2238	1	534		246	686	425				2cf5bec40a3ef4476bf46f509f729c16_7749														B9T21_09630.p01					B9T18_10140.p01			A6V30_10345.p01
B9T13_10120		IS6 family transposase	2	2	1	1	2236	1	532		124	686	405						4a9cac2c1a817d9acdec143b653b9a80_11																		B9T13_10120.p01
B9T21_08670		IS6 family transposase	1	1	1	1	3064	103	1		686	686	686																		B9T21_08670.p01
J7560_09975		IS6 family transposase	1	1	1	23	1	73	1	Investigate	454	454	454				2cf5bec40a3ef4476bf46f509f729c16_7882
J7560_09990		IS6 family transposase	1	1	1	16	1	87	1	Investigate	388	388	388				2cf5bec40a3ef4476bf46f509f729c16_7894
J7553_10045		IS6 family transposase	1	1	1	1	2121	1	761		686	686	686							ac8fed72b32d7540cf9a1b9ac12df95a_7943
J7553_09955		IS6 family transposase	1	1	1	1	2964	1	423		373	373	373							ac8fed72b32d7540cf9a1b9ac12df95a_7879
J7552_10020		IS6 family transposase	1	1	1	1	3228	1	730		172	172	172								197b0243bc5bc4c380ecfb8919a026b1_7930
J7552_10080		IS6 family transposase	1	1	1	13	1	96	1	Investigate	457	457	457								197b0243bc5bc4c380ecfb8919a026b1_7980
J7552_10085		IS6 family transposase	1	1	1	31	1	75	1	Investigate	403	403	403								197b0243bc5bc4c380ecfb8919a026b1_7984
J7552_10075		IS6 family transposase	1	1	1	9	1	116	1	Investigate	425	425	425								197b0243bc5bc4c380ecfb8919a026b1_7976
B9T21_07495		KpsF/GutQ family sugar-phosphate isomerase	5	5	1	1	2662	4	31		941	941	941										614e29224da4f337b8899b3142d81070_6086	d977e7edc1a56720a787e465ab4ce472_6209	e653c257947c2dd0a414de7cb159ba14_6195			83683a6c7ca473684645e0830a47223d_6477			B9T21_07495.p01
J7552_06505		KpsF/GutQ family sugar-phosphate isomerase	1	1	1	1	2661	4	24		941	941	941								197b0243bc5bc4c380ecfb8919a026b1_5174
J7624_10050		KTSC domain-containing protein	1	1	1	1	2165	1	1823		209	209	209																03da1bd30b32560bef8e38ea7761d9fe_7966
BMY_0934		L-aspartate dehydrogenase	1	1	1	1	710	169	1		377	377	377		BMY_0934.p01
B9T11_10090		leucine--tRNA ligase	1	1	1	1	2214	1	869		2717	2717	2717																					B9T11_10090.p01
A6V30_09970		leukotoxin secretion protein D	17	17	1	1	3444	1	385		1196	1433	1408	B9T10_07240.p01	BMY_1801.p01	a04b031c37c06570dd644ef46d09ac8c_2284	2cf5bec40a3ef4476bf46f509f729c16_3188				197b0243bc5bc4c380ecfb8919a026b1_3310	79ccbe49faa72747a800162f6a36c0ca_4460				31e4ba73e5ddb8c85dea419204f0df5a_4366				c648bd7c3a222aa51bed3e3836bcf8c8_5098	B9T21_04995.p01	B9T15_07130.p01	B9T14_07100.p01	B9T11_02755.p01	B9T12_09660.p01	B9T18_05450.p01	B9T13_05805.p01	F387_00613.p01	A6V30_09970.p01
B9T13_05820		leukotoxin secretion protein D	5	5	1	1	3439	1	388		1250	1250	1250																			B9T15_07145.p01	B9T14_07115.p01	B9T11_10255.p01	B9T12_09640.p01		B9T13_05820.p01
B9T10_07320		leukotoxin secretion protein D	1	1	1	1	3427	1	903		1250	1250	1250	B9T10_07320.p01
F387_01905		Leukotoxin secretion protein D	1	1	1	1	409	1	361		1196	1196	1196																									F387_01905.p01
B9T10_05770		lipid carrier--UDP-N-acetylgalactosaminyltransferase	3	3	1	1	33	1	573		548	548	548	B9T10_05770.p01																					B9T12_06485.p01		B9T13_04260.p01
BMY_0104		lipid-A-disaccharide synthase	1	1	1	1	635	1	147		206	206	206		BMY_0104.p01
J7602_08130		lipoprotein	11	11	1	1	3126	307	1		119	119	119		BMY_1267.p01	a04b031c37c06570dd644ef46d09ac8c_6711	2cf5bec40a3ef4476bf46f509f729c16_6179	102e21fe2bbcace64a7555dd0bcc9007_7410	4a9cac2c1a817d9acdec143b653b9a80_7404			79ccbe49faa72747a800162f6a36c0ca_6285	614e29224da4f337b8899b3142d81070_6748	d977e7edc1a56720a787e465ab4ce472_6450	e653c257947c2dd0a414de7cb159ba14_6437			83683a6c7ca473684645e0830a47223d_7269	03da1bd30b32560bef8e38ea7761d9fe_6485
J7600_02475		LlaJI family restriction endonuclease	6	6	1	1	2198	1	1848		1286	1286	1286			a04b031c37c06570dd644ef46d09ac8c_5268							614e29224da4f337b8899b3142d81070_1967	d977e7edc1a56720a787e465ab4ce472_1980	e653c257947c2dd0a414de7cb159ba14_1967			83683a6c7ca473684645e0830a47223d_701			B9T21_09845.p01
F387_01827		Low calcium response locus protein T	1	1	1	1	830	1	276		512	512	512																									F387_01827.p01
lptD		LPS assembly protein LptD	24	24	1	1	1904	1	1157		1043	2456	2359	B9T10_02720.p01	BMY_0410.p01	a04b031c37c06570dd644ef46d09ac8c_155	2cf5bec40a3ef4476bf46f509f729c16_133		4a9cac2c1a817d9acdec143b653b9a80_633	ac8fed72b32d7540cf9a1b9ac12df95a_1165	197b0243bc5bc4c380ecfb8919a026b1_1172	79ccbe49faa72747a800162f6a36c0ca_555	614e29224da4f337b8899b3142d81070_1167	d977e7edc1a56720a787e465ab4ce472_1180	e653c257947c2dd0a414de7cb159ba14_1167	31e4ba73e5ddb8c85dea419204f0df5a_1212	752b3971131f3206662b5e22da3b23aa_559	83683a6c7ca473684645e0830a47223d_1501	03da1bd30b32560bef8e38ea7761d9fe_697		B9T21_02525.p01	B9T15_01995.p01	B9T14_03035.p01	B9T11_00195.p01	B9T12_02535.p01	B9T18_02550.p01	B9T13_02595.p01	F387_00305.p01	A6V30_04160.p01
group_229	lptD	LPS assembly protein LptD	2	2	1	1	1906	1	1158		587	2444	1515		BMY_0411.p01															c648bd7c3a222aa51bed3e3836bcf8c8_1607
BMY_0165		LPS export ABC transporter permease LptG	1	1	1	1	1597	1	154		920	920	920		BMY_0165.p01
B143_RS0105150		LPS O-antigen chain length determinant protein WzzB	3	3	1	1	45	1	552		1037	1037	1037							ac8fed72b32d7540cf9a1b9ac12df95a_6861										c648bd7c3a222aa51bed3e3836bcf8c8_4020						B9T18_06870.p01
BMY_0412		LPS-assembly protein LptD	1	1	1	1	1905	1	185		659	659	659		BMY_0412.p01
J7602_08700		LysR family transcriptional regulator	22	22	1	1	2863	98	2		761	890	884	B9T10_04360.p01	BMY_0698.p01	a04b031c37c06570dd644ef46d09ac8c_7845				ac8fed72b32d7540cf9a1b9ac12df95a_1721	197b0243bc5bc4c380ecfb8919a026b1_6270	79ccbe49faa72747a800162f6a36c0ca_2120	614e29224da4f337b8899b3142d81070_7047	d977e7edc1a56720a787e465ab4ce472_6905	e653c257947c2dd0a414de7cb159ba14_6895	31e4ba73e5ddb8c85dea419204f0df5a_27	752b3971131f3206662b5e22da3b23aa_2202	83683a6c7ca473684645e0830a47223d_27	03da1bd30b32560bef8e38ea7761d9fe_7899	c648bd7c3a222aa51bed3e3836bcf8c8_601	B9T21_07130.p01	B9T15_00760.p01	B9T14_04270.p01	B9T11_05610.p01	B9T12_04070.p01	B9T18_00745.p01	B9T13_08285.p01		A6V30_05185.p01
B9T18_02375		LysR family transcriptional regulator	10	10	1	1	557	1	1117		920	920	920	B9T10_02910.p01					4a9cac2c1a817d9acdec143b653b9a80_485				614e29224da4f337b8899b3142d81070_1313	d977e7edc1a56720a787e465ab4ce472_1326	e653c257947c2dd0a414de7cb159ba14_1313			83683a6c7ca473684645e0830a47223d_1355		c648bd7c3a222aa51bed3e3836bcf8c8_1459	B9T21_02715.p01					B9T18_02375.p01			A6V30_04335.p01
F387_01766		LysR family transcriptional regulator	5	5	1	1	2861	98	1		137	890	739		BMY_0699.p01		2cf5bec40a3ef4476bf46f509f729c16_5257	102e21fe2bbcace64a7555dd0bcc9007_5733	4a9cac2c1a817d9acdec143b653b9a80_5785																			F387_01766.p01
B9T21_06895		LysR family transcriptional regulator	2	2	1	1	2594	1	698		902	941	921																	c648bd7c3a222aa51bed3e3836bcf8c8_787	B9T21_06895.p01
J7602_02815		M15 family metallopeptidase	12	12	1	1	590	1	1326		494	503	499	B9T10_02325.p01									614e29224da4f337b8899b3142d81070_2227	d977e7edc1a56720a787e465ab4ce472_2240	e653c257947c2dd0a414de7cb159ba14_2227			83683a6c7ca473684645e0830a47223d_441	03da1bd30b32560bef8e38ea7761d9fe_7599	c648bd7c3a222aa51bed3e3836bcf8c8_1928		B9T15_02395.p01	B9T14_02640.p01	B9T11_08730.p01		B9T18_01605.p01			A6V30_07050.p01
B9T13_09940		M15 family metallopeptidase	10	10	1	1	2161	1	1836		389	494	483		BMY_0035.p01					ac8fed72b32d7540cf9a1b9ac12df95a_4252			614e29224da4f337b8899b3142d81070_1955	d977e7edc1a56720a787e465ab4ce472_1968	e653c257947c2dd0a414de7cb159ba14_1955			83683a6c7ca473684645e0830a47223d_713	03da1bd30b32560bef8e38ea7761d9fe_3804					B9T11_04985.p01	B9T12_04690.p01		B9T13_09940.p01
J7558_06945		M15 family metallopeptidase	1	1	1	1	586	1	1241		494	494	494			a04b031c37c06570dd644ef46d09ac8c_5526
J7558_10095		M15 family metallopeptidase	1	1	1	1	1433	1	1888		373	373	373			a04b031c37c06570dd644ef46d09ac8c_8004
J7558_10105		M15 family metallopeptidase	1	1	1	22	1	89	1	Investigate	373	373	373			a04b031c37c06570dd644ef46d09ac8c_8012
J7624_07680		M15 family metallopeptidase	1	1	1	1	2151	1	8		494	494	494																03da1bd30b32560bef8e38ea7761d9fe_6102
J7620_09955		M15 family metallopeptidase	1	1	1	21	1	80	2	Investigate	494	494	494														752b3971131f3206662b5e22da3b23aa_7885
J7620_09975		M15 family metallopeptidase	1	1	1	7	1	59	1		491	491	491														752b3971131f3206662b5e22da3b23aa_7898
J7560_04955		M15 family peptidase	1	1	1	1	2177	1	1840		494	494	494				2cf5bec40a3ef4476bf46f509f729c16_3937
B143_RS09705		major capsid protein	2	2	1	1	617	1	1394		206	206	206																	c648bd7c3a222aa51bed3e3836bcf8c8_2249							B9T13_01985.p01
F387_01483		Major outer membrane protein P.IB	1	1	1	1	347	289	1		1202	1202	1202																									F387_01483.p01
BMY_1390		Manganese transport system ATP-binding protein MntB	1	1	1	1	133	308	1		803	803	803		BMY_1390.p01
J7624_06245		MarR family transcriptional regulator	23	23	1	1	252	21	2		443	446	443		BMY_1448.p01	a04b031c37c06570dd644ef46d09ac8c_3692	2cf5bec40a3ef4476bf46f509f729c16_4284	102e21fe2bbcace64a7555dd0bcc9007_4753	4a9cac2c1a817d9acdec143b653b9a80_4954	ac8fed72b32d7540cf9a1b9ac12df95a_5706	197b0243bc5bc4c380ecfb8919a026b1_4480	79ccbe49faa72747a800162f6a36c0ca_4747	614e29224da4f337b8899b3142d81070_4897			31e4ba73e5ddb8c85dea419204f0df5a_5898	752b3971131f3206662b5e22da3b23aa_4828	83683a6c7ca473684645e0830a47223d_5115	03da1bd30b32560bef8e38ea7761d9fe_4972	c648bd7c3a222aa51bed3e3836bcf8c8_3745	B9T21_03240.p01	B9T15_05395.p01	B9T14_05380.p01	B9T11_04485.p01	B9T12_08195.p01	B9T18_07190.p01	B9T13_03970.p01	F387_01401.p01	A6V30_08095.p01
J7620_09790		MATE family efflux transporter	3	3	1	1	2960	1	447		1325	1325	1325								197b0243bc5bc4c380ecfb8919a026b1_7755						752b3971131f3206662b5e22da3b23aa_7765										B9T13_10240.p01
J7552_09210		MBL fold metallo-hydrolase	1	1	1	1	3171	45	7		1220	1220	1220								197b0243bc5bc4c380ecfb8919a026b1_7309
J7553_05180		metal-dependent hydrolase	2	2	1	1	524	1	330		719	719	719							ac8fed72b32d7540cf9a1b9ac12df95a_4112											B9T21_02760.p01
A6V30_07795		metal-dependent hydrolase	1	1	1	1	188	3	43		782	782	782																										A6V30_07795.p01
J7552_07390		metallophosphoesterase	3	3	1	1	1953	1	997		581	581	581		BMY_0567.p01				4a9cac2c1a817d9acdec143b653b9a80_47		197b0243bc5bc4c380ecfb8919a026b1_5875
J7553_05175		metallophosphoesterase	2	2	1	1	525	1	331		581	581	581							ac8fed72b32d7540cf9a1b9ac12df95a_4108											B9T21_02755.p01
B9T18_04065		methionine ABC transporter substrate-binding protein	18	18	1	1	1387	24	1		815	815	815		BMY_2095.p01	a04b031c37c06570dd644ef46d09ac8c_4668	2cf5bec40a3ef4476bf46f509f729c16_3807	102e21fe2bbcace64a7555dd0bcc9007_3846	4a9cac2c1a817d9acdec143b653b9a80_1840			79ccbe49faa72747a800162f6a36c0ca_5281	614e29224da4f337b8899b3142d81070_5792	d977e7edc1a56720a787e465ab4ce472_5914	e653c257947c2dd0a414de7cb159ba14_5898	31e4ba73e5ddb8c85dea419204f0df5a_4426		83683a6c7ca473684645e0830a47223d_5633	03da1bd30b32560bef8e38ea7761d9fe_3932		B9T21_01025.p01			B9T11_01700.p01	B9T12_01040.p01	B9T18_04065.p01	B9T13_01045.p01	F387_01042.p01
J7607_01435		MFS transporter	24	24	1	1	1926	1	1140		173	1115	1075	B9T10_02820.p01	BMY_0436.p01	a04b031c37c06570dd644ef46d09ac8c_79	2cf5bec40a3ef4476bf46f509f729c16_57		4a9cac2c1a817d9acdec143b653b9a80_557	ac8fed72b32d7540cf9a1b9ac12df95a_1241	197b0243bc5bc4c380ecfb8919a026b1_1248	79ccbe49faa72747a800162f6a36c0ca_479	614e29224da4f337b8899b3142d81070_1243	d977e7edc1a56720a787e465ab4ce472_1256	e653c257947c2dd0a414de7cb159ba14_1243	31e4ba73e5ddb8c85dea419204f0df5a_1136	752b3971131f3206662b5e22da3b23aa_483	83683a6c7ca473684645e0830a47223d_1425	03da1bd30b32560bef8e38ea7761d9fe_621		B9T21_02625.p01	B9T15_01895.p01	B9T14_03135.p01	B9T11_00095.p01	B9T12_02635.p01	B9T18_02450.p01	B9T13_02695.p01	F387_00325.p01	A6V30_04260.p01
BMY_1353		MFS transporter	13	13	1	1	3015	40	1		1160	1166	1161		BMY_1353.p01		2cf5bec40a3ef4476bf46f509f729c16_6505				197b0243bc5bc4c380ecfb8919a026b1_6852		614e29224da4f337b8899b3142d81070_6380	d977e7edc1a56720a787e465ab4ce472_6817	e653c257947c2dd0a414de7cb159ba14_6805		752b3971131f3206662b5e22da3b23aa_6010	83683a6c7ca473684645e0830a47223d_6905				B9T15_09160.p01	B9T14_09130.p01	B9T11_09530.p01			B9T13_09105.p01	F387_01350.p01
J7552_01635		MFS transporter	6	6	1	1	1940	1	1124		1232	1310	1245			a04b031c37c06570dd644ef46d09ac8c_27					197b0243bc5bc4c380ecfb8919a026b1_1300					31e4ba73e5ddb8c85dea419204f0df5a_1088			03da1bd30b32560bef8e38ea7761d9fe_569						B9T12_02700.p01			F387_00338.p01
J7558_08545		MHS family MFS transporter	2	2	1	1	700	199	1		1328	1328	1328			a04b031c37c06570dd644ef46d09ac8c_6789													03da1bd30b32560bef8e38ea7761d9fe_6924
J7607_06020		MHS family MFS transporter	1	1	1	1	674	7	16		1376	1376	1376													31e4ba73e5ddb8c85dea419204f0df5a_4784
J7561_10035		MobA/MobL family protein	3	3	1	2	5	46	4		1385	1385	1385					102e21fe2bbcace64a7555dd0bcc9007_7906	4a9cac2c1a817d9acdec143b653b9a80_7940																			F387_02034.p01
J7620_10000		MobA/MobL family protein	2	2	1	1	2129	1	513		932	932	932														752b3971131f3206662b5e22da3b23aa_7917							B9T11_10205.p01
J7558_10010		MobA/MobL family protein	1	1	1	1	2094	1	511		971	971	971			a04b031c37c06570dd644ef46d09ac8c_7941
J7553_10065		MobA/MobL family protein	1	1	1	5	1	65	1		788	788	788							ac8fed72b32d7540cf9a1b9ac12df95a_7958
J7561_10040		mobilization protein	3	3	1	2	6	46	5		269	386	308					102e21fe2bbcace64a7555dd0bcc9007_7910	4a9cac2c1a817d9acdec143b653b9a80_7944																			F387_02035.p01
F387_01956		mobilization protein	3	3	1	1	2130	1	514		254	278	268																					B9T11_10200.p01				F387_01956.p01	A6V30_10195.p01
F387_01966		mobilization protein	3	3	1	1	2128	1	512		217	269	251			a04b031c37c06570dd644ef46d09ac8c_7937											752b3971131f3206662b5e22da3b23aa_7913											F387_01966.p01
B9T15_09885		mobilization protein	2	2	1	1	2047	1	843		269	269	269																			B9T15_09885.p01	B9T14_09855.p01
A6V30_10300		mobilization protein	1	1	1	1	2104	1	812		278	278	278																										A6V30_10300.p01
A6V30_10200		mobilization protein	1	1	1	1	2073	1	475		968	968	968																										A6V30_10200.p01
A6V30_10305		mobilization protein	1	1	1	1	2105	1	813		968	968	968																										A6V30_10305.p01
F387_01965		Mobilization protein MobL	1	1	1	1	2099	1	507		929	929	929																									F387_01965.p01
F387_01976		Mobilization protein MobL	1	1	1	1	2142	1	1872		947	947	947																									F387_01976.p01
F387_01975		Mobilization protein mobS	1	1	1	1	2141	1	1871		272	272	272																									F387_01975.p01
J7558_05675		molecular chaperone DnaJ	1	1	1	1	534	1	205		359	359	359			a04b031c37c06570dd644ef46d09ac8c_4515
A6V30_07840		molybdenum cofactor biosynthesis protein MoaE	1	1	1	1	197	3	28		458	458	458																										A6V30_07840.p01
A6V30_07845		molybdenum cofactor guanylyltransferase	1	1	1	1	198	3	27		599	599	599																										A6V30_07845.p01
A6V30_07850		molybdopterin molybdenumtransferase	1	1	1	1	199	3	26		1181	1181	1181																										A6V30_07850.p01
A6V30_07835		molybdopterin synthase sulfur carrier subunit	1	1	1	1	196	3	29		248	248	248																										A6V30_07835.p01
J7561_07340		Mov34/MPN/PAD-1 family protein	2	2	1	1	2617	6	31		479	479	479					102e21fe2bbcace64a7555dd0bcc9007_5793	4a9cac2c1a817d9acdec143b653b9a80_5845
J7560_06705		Mov34/MPN/PAD-1 family protein	1	1	1	1	2605	6	16		461	461	461				2cf5bec40a3ef4476bf46f509f729c16_5313
B9T21_02130		MoxR family ATPase	24	24	1	1	1744	1	1349		746	911	904	B9T10_02140.p01	BMY_0319.p01	a04b031c37c06570dd644ef46d09ac8c_474	2cf5bec40a3ef4476bf46f509f729c16_452		4a9cac2c1a817d9acdec143b653b9a80_952	ac8fed72b32d7540cf9a1b9ac12df95a_846	197b0243bc5bc4c380ecfb8919a026b1_853	79ccbe49faa72747a800162f6a36c0ca_874	614e29224da4f337b8899b3142d81070_846	d977e7edc1a56720a787e465ab4ce472_859	e653c257947c2dd0a414de7cb159ba14_846	31e4ba73e5ddb8c85dea419204f0df5a_1531	752b3971131f3206662b5e22da3b23aa_878	83683a6c7ca473684645e0830a47223d_1822	03da1bd30b32560bef8e38ea7761d9fe_1016	c648bd7c3a222aa51bed3e3836bcf8c8_2080	B9T21_02130.p01	B9T15_02575.p01	B9T14_02460.p01	B9T11_00595.p01	B9T12_02150.p01	B9T18_02950.p01	B9T13_02200.p01		A6V30_03755.p01
A6V30_10020		multicopper oxidase family protein	6	6	1	1	2054	1	849		1415	1589	1555					102e21fe2bbcace64a7555dd0bcc9007_7835	4a9cac2c1a817d9acdec143b653b9a80_7831							31e4ba73e5ddb8c85dea419204f0df5a_7890											B9T13_10355.p01	F387_02007.p01	A6V30_10020.p01
J7624_02535		MvaI/BcnI restriction endonuclease family protein	1	1	1	1	794	1	301		1439	1439	1439																03da1bd30b32560bef8e38ea7761d9fe_2021
J7606_08315		N-6 DNA methylase	4	4	1	1	3192	37	7		1484	1484	1484										614e29224da4f337b8899b3142d81070_6584	d977e7edc1a56720a787e465ab4ce472_6615	e653c257947c2dd0a414de7cb159ba14_6602			83683a6c7ca473684645e0830a47223d_7106
J7554_08595		N-6 DNA methylase	1	1	1	1	2430	1	1747		2507	2507	2507									79ccbe49faa72747a800162f6a36c0ca_6829
BMY_0728		Na+/H+ antiporter	1	1	1	1	2823	174	1		149	149	149		BMY_0728.p01
group_1295	nhaC	Na+/H+ antiporter NhaC	14	14	1	1	743	1	243		1325	1445	1436		BMY_1163.p01		2cf5bec40a3ef4476bf46f509f729c16_1445	102e21fe2bbcace64a7555dd0bcc9007_1937	4a9cac2c1a817d9acdec143b653b9a80_6290		197b0243bc5bc4c380ecfb8919a026b1_2214		614e29224da4f337b8899b3142d81070_3261	d977e7edc1a56720a787e465ab4ce472_4384	e653c257947c2dd0a414de7cb159ba14_4367		752b3971131f3206662b5e22da3b23aa_2801	83683a6c7ca473684645e0830a47223d_3931				B9T15_07660.p01	B9T14_07630.p01				B9T13_06325.p01	F387_01808.p01
BMY_0280		N-acetylmuramic acid 6-phosphate etherase	1	1	1	1	612	1	1383		431	431	431		BMY_0280.p01
J7620_06315		N-acetylneuraminate synthase family protein	10	10	1	1	317	1	677		950	1031	1014					102e21fe2bbcace64a7555dd0bcc9007_4940	4a9cac2c1a817d9acdec143b653b9a80_4767	ac8fed72b32d7540cf9a1b9ac12df95a_5521	197b0243bc5bc4c380ecfb8919a026b1_4695	79ccbe49faa72747a800162f6a36c0ca_4934				31e4ba73e5ddb8c85dea419204f0df5a_6111	752b3971131f3206662b5e22da3b23aa_5015			c648bd7c3a222aa51bed3e3836bcf8c8_3932	B9T21_03475.p01								A6V30_08330.p01
J7600_05825		N-acetyltransferase	5	5	1	1	8	1	594		590	590	590									79ccbe49faa72747a800162f6a36c0ca_5046	614e29224da4f337b8899b3142d81070_4623	d977e7edc1a56720a787e465ab4ce472_5078	e653c257947c2dd0a414de7cb159ba14_4723			83683a6c7ca473684645e0830a47223d_5389
B9T12_06505		NAD(P)-dependent oxidoreductase	1	1	1	1	18	1	568		869	869	869																						B9T12_06505.p01
group_1857	gabD	NAD-dependent succinate-semialdehyde dehydrogenase	20	20	1	1	1880	1	1181		1388	1388	1388		BMY_0388.p01	a04b031c37c06570dd644ef46d09ac8c_235	2cf5bec40a3ef4476bf46f509f729c16_213		4a9cac2c1a817d9acdec143b653b9a80_713	ac8fed72b32d7540cf9a1b9ac12df95a_1085	197b0243bc5bc4c380ecfb8919a026b1_1092	79ccbe49faa72747a800162f6a36c0ca_635	614e29224da4f337b8899b3142d81070_1087	d977e7edc1a56720a787e465ab4ce472_1100	e653c257947c2dd0a414de7cb159ba14_1087	31e4ba73e5ddb8c85dea419204f0df5a_1292	752b3971131f3206662b5e22da3b23aa_639	83683a6c7ca473684645e0830a47223d_1581	03da1bd30b32560bef8e38ea7761d9fe_777	c648bd7c3a222aa51bed3e3836bcf8c8_1687		B9T15_02095.p01		B9T11_00295.p01		B9T18_02650.p01		F387_00282.p01	A6V30_04060.p01
group_958	gabD	NAD-dependent succinate-semialdehyde dehydrogenase	11	11	1	1	558	1	1118		896	1391	1346	B9T10_02915.p01	BMY_0453.p01				4a9cac2c1a817d9acdec143b653b9a80_481				614e29224da4f337b8899b3142d81070_1317	d977e7edc1a56720a787e465ab4ce472_1330	e653c257947c2dd0a414de7cb159ba14_1317			83683a6c7ca473684645e0830a47223d_1351		c648bd7c3a222aa51bed3e3836bcf8c8_1455	B9T21_02720.p01					B9T18_02370.p01			A6V30_04340.p01
J7607_06050		NAD-dependent succinate-semialdehyde dehydrogenase	1	1	1	1	668	7	10		1451	1451	1451													31e4ba73e5ddb8c85dea419204f0df5a_4808
BMY_1337		NADH dehydrogenase subunit D	1	1	1	1	3030	197	1		581	581	581		BMY_1337.p01
BMY_0329		NgoFVII family restriction endonuclease	1	1	1	1	601	1	178		197	197	197		BMY_0329.p01
BMY_0328		NgoFVII family restriction endonuclease	1	1	1	1	600	1	177		674	674	674		BMY_0328.p01
J7622_01530		nitroreductase family protein	24	24	1	1	3336	1	1075		599	599	599	B9T10_03075.p01	BMY_0489.p01	a04b031c37c06570dd644ef46d09ac8c_4159	2cf5bec40a3ef4476bf46f509f729c16_5105		4a9cac2c1a817d9acdec143b653b9a80_349	ac8fed72b32d7540cf9a1b9ac12df95a_4470	197b0243bc5bc4c380ecfb8919a026b1_5570	79ccbe49faa72747a800162f6a36c0ca_305	614e29224da4f337b8899b3142d81070_1453	d977e7edc1a56720a787e465ab4ce472_1466	e653c257947c2dd0a414de7cb159ba14_1453	31e4ba73e5ddb8c85dea419204f0df5a_932	752b3971131f3206662b5e22da3b23aa_301	83683a6c7ca473684645e0830a47223d_1215	03da1bd30b32560bef8e38ea7761d9fe_417	c648bd7c3a222aa51bed3e3836bcf8c8_1319	B9T21_09155.p01	B9T15_01665.p01	B9T14_03365.p01	B9T11_08150.p01		B9T18_02205.p01	B9T13_03170.p01	F387_01079.p01	A6V30_04500.p01
J7561_05950		nitroreductase family protein	2	2	1	1	68	1	640		1010	1010	1010					102e21fe2bbcace64a7555dd0bcc9007_4968	4a9cac2c1a817d9acdec143b653b9a80_4739
J7558_06845		nucleoid-associated protein	1	1	1	1	1795	1	1293		1103	1103	1103			a04b031c37c06570dd644ef46d09ac8c_5447
J7560_06060		nucleoid-associated protein	1	1	1	1	2005	1	1654		761	761	761				2cf5bec40a3ef4476bf46f509f729c16_4804
J7554_06360		nucleotide sugar dehydrogenase	5	5	1	1	10	1	596		1310	1310	1310									79ccbe49faa72747a800162f6a36c0ca_5054	614e29224da4f337b8899b3142d81070_4615	d977e7edc1a56720a787e465ab4ce472_5086	e653c257947c2dd0a414de7cb159ba14_4715			83683a6c7ca473684645e0830a47223d_5397
J7620_09860		nucleotidyl transferase AbiEii/AbiGii toxin family protein	1	1	1	1	2991	1	792		707	707	707														752b3971131f3206662b5e22da3b23aa_7818
J7561_07330		nucleotidyltransferase	2	2	1	1	2619	6	33		1037	1037	1037					102e21fe2bbcace64a7555dd0bcc9007_5785	4a9cac2c1a817d9acdec143b653b9a80_5837
B9T10_07285		nucleotidyltransferase	1	1	1	1	3420	1	896		893	893	893	B9T10_07285.p01
J7624_09735		nucleotidyltransferase	1	1	1	1	541	1	103		947	947	947																03da1bd30b32560bef8e38ea7761d9fe_7722
J7607_01585		nucleotidyltransferase family protein	24	24	1	1	1894	1	1172		617	617	617	B9T10_02670.p01	BMY_0398.p01	a04b031c37c06570dd644ef46d09ac8c_195	2cf5bec40a3ef4476bf46f509f729c16_173		4a9cac2c1a817d9acdec143b653b9a80_673	ac8fed72b32d7540cf9a1b9ac12df95a_1125	197b0243bc5bc4c380ecfb8919a026b1_1132	79ccbe49faa72747a800162f6a36c0ca_595	614e29224da4f337b8899b3142d81070_1127	d977e7edc1a56720a787e465ab4ce472_1140	e653c257947c2dd0a414de7cb159ba14_1127	31e4ba73e5ddb8c85dea419204f0df5a_1252	752b3971131f3206662b5e22da3b23aa_599	83683a6c7ca473684645e0830a47223d_1541	03da1bd30b32560bef8e38ea7761d9fe_737		B9T21_02475.p01	B9T15_02045.p01	B9T14_02985.p01	B9T11_00245.p01	B9T12_02485.p01	B9T18_02600.p01	B9T13_02545.p01	F387_00295.p01	A6V30_04110.p01
B143_RS0102100		nucleotidyltransferase family protein	1	1	1	1	1892	1	1167		617	617	617																	c648bd7c3a222aa51bed3e3836bcf8c8_1647
J7602_06310		O-antigen ligase family protein	4	4	1	1	56	1	648		1196	1196	1196										614e29224da4f337b8899b3142d81070_4695	d977e7edc1a56720a787e465ab4ce472_5006	e653c257947c2dd0a414de7cb159ba14_4795			83683a6c7ca473684645e0830a47223d_5317
J7558_04375		O-antigen translocase	1	1	1	1	46	1	687		1238	1238	1238			a04b031c37c06570dd644ef46d09ac8c_3482
B9T18_06925		O-antigen translocase	1	1	1	1	98	1	681		1259	1259	1259																							B9T18_06925.p01
J7558_06815		ogr/Delta-like zinc finger family protein	12	12	1	1	1805	1	1275		191	230	207	B9T10_02210.p01		a04b031c37c06570dd644ef46d09ac8c_5423							614e29224da4f337b8899b3142d81070_2115	d977e7edc1a56720a787e465ab4ce472_2128	e653c257947c2dd0a414de7cb159ba14_2115			83683a6c7ca473684645e0830a47223d_553	03da1bd30b32560bef8e38ea7761d9fe_31	c648bd7c3a222aa51bed3e3836bcf8c8_2024		B9T15_02510.p01	B9T14_02525.p01	B9T11_08615.p01		B9T18_01715.p01
J7552_05915		oligosaccharide flippase family protein	10	10	1	1	320	1	674		1211	1211	1211					102e21fe2bbcace64a7555dd0bcc9007_4952	4a9cac2c1a817d9acdec143b653b9a80_4755	ac8fed72b32d7540cf9a1b9ac12df95a_5509	197b0243bc5bc4c380ecfb8919a026b1_4707	79ccbe49faa72747a800162f6a36c0ca_4946				31e4ba73e5ddb8c85dea419204f0df5a_6123	752b3971131f3206662b5e22da3b23aa_5027			c648bd7c3a222aa51bed3e3836bcf8c8_3944	B9T21_03490.p01								A6V30_08345.p01
J7600_05930		oligosaccharide flippase family protein	6	6	1	1	62	1	605		1172	1235	1182										614e29224da4f337b8899b3142d81070_4707	d977e7edc1a56720a787e465ab4ce472_4994	e653c257947c2dd0a414de7cb159ba14_4807			83683a6c7ca473684645e0830a47223d_5305							B9T12_08435.p01			F387_01449.p01
J7602_06390		oligosaccharide flippase family protein	5	5	1	1	6	1	592		1268	1268	1268									79ccbe49faa72747a800162f6a36c0ca_5038	614e29224da4f337b8899b3142d81070_4631	d977e7edc1a56720a787e465ab4ce472_5070	e653c257947c2dd0a414de7cb159ba14_4731			83683a6c7ca473684645e0830a47223d_5381
B9T10_05710		oligosaccharide flippase family protein	5	5	1	1	78	1	662		1214	1259	1241	B9T10_05710.p01						ac8fed72b32d7540cf9a1b9ac12df95a_5497		79ccbe49faa72747a800162f6a36c0ca_4958					752b3971131f3206662b5e22da3b23aa_5039												A6V30_08375.p01
J7547_06235		oligosaccharide flippase family protein	2	2	1	1	69	1	641		1280	1280	1280					102e21fe2bbcace64a7555dd0bcc9007_4964	4a9cac2c1a817d9acdec143b653b9a80_4743
J7553_08700		oligosaccharide flippase family protein	1	1	1	1	324	1	630		1286	1286	1286							ac8fed72b32d7540cf9a1b9ac12df95a_6905
J7620_06445		oligosaccharide flippase family protein	1	1	1	1	3761	1	590		1262	1262	1262														752b3971131f3206662b5e22da3b23aa_5119
B143_RS0105105		oligosaccharide flippase family protein	1	1	1	1	105	1	624		1415	1415	1415																	c648bd7c3a222aa51bed3e3836bcf8c8_3984
J7554_06335		oligosaccharide repeat unit polymerase	5	5	1	1	5	1	591		1322	1322	1322									79ccbe49faa72747a800162f6a36c0ca_5034	614e29224da4f337b8899b3142d81070_4635	d977e7edc1a56720a787e465ab4ce472_5066	e653c257947c2dd0a414de7cb159ba14_4735			83683a6c7ca473684645e0830a47223d_5377
BMY_0710		outer membrane autotransporter barrel domain-containing protein	2	2	1	1	2840	41	6		626	3456	2041		BMY_0710.p01																							F387_01679.p01
BMY_0455		outer membrane autotransporter barrel domain-containing protein	1	1	1	1	551	1	1111		818	818	818		BMY_0455.p01
J7600_01640		oxidoreductase	10	10	1	1	554	1	1114		950	950	950	B9T10_02895.p01					4a9cac2c1a817d9acdec143b653b9a80_497				614e29224da4f337b8899b3142d81070_1301	d977e7edc1a56720a787e465ab4ce472_1314	e653c257947c2dd0a414de7cb159ba14_1301			83683a6c7ca473684645e0830a47223d_1367		c648bd7c3a222aa51bed3e3836bcf8c8_1471	B9T21_02700.p01					B9T18_02390.p01			A6V30_04320.p01
B9T18_01585		P2 family phage major capsid protein	13	13	1	1	594	1	1330		1019	1019	1019	B9T10_02345.p01		a04b031c37c06570dd644ef46d09ac8c_5542							614e29224da4f337b8899b3142d81070_2243	d977e7edc1a56720a787e465ab4ce472_2256	e653c257947c2dd0a414de7cb159ba14_2243			83683a6c7ca473684645e0830a47223d_425	03da1bd30b32560bef8e38ea7761d9fe_7583	c648bd7c3a222aa51bed3e3836bcf8c8_1912		B9T15_02375.p01	B9T14_02660.p01	B9T11_08750.p01		B9T18_01585.p01			A6V30_07030.p01
B143_RS0104020		PACE efflux transporter	1	1	1	1	1347	84	2		440	440	440																	c648bd7c3a222aa51bed3e3836bcf8c8_3128
J7607_06815		PAS domain-containing protein	24	24	1	1	2764	159	1		317	449	432	B9T10_04725.p01	BMY_0779.p01	a04b031c37c06570dd644ef46d09ac8c_6131	2cf5bec40a3ef4476bf46f509f729c16_5891			ac8fed72b32d7540cf9a1b9ac12df95a_2012	197b0243bc5bc4c380ecfb8919a026b1_5240	79ccbe49faa72747a800162f6a36c0ca_2411	614e29224da4f337b8899b3142d81070_6021	d977e7edc1a56720a787e465ab4ce472_6142	e653c257947c2dd0a414de7cb159ba14_6128	31e4ba73e5ddb8c85dea419204f0df5a_5415	752b3971131f3206662b5e22da3b23aa_1919	83683a6c7ca473684645e0830a47223d_6544	03da1bd30b32560bef8e38ea7761d9fe_5512	c648bd7c3a222aa51bed3e3836bcf8c8_310	B9T21_07575.p01	B9T15_00385.p01	B9T14_04640.p01	B9T11_05980.p01	B9T12_03700.p01	B9T18_00385.p01	B9T13_08650.p01	F387_01615.p01	A6V30_05550.p01
BMY_1284		penicillin-binding protein 1C	1	1	1	1	3143	63	1		665	665	665		BMY_1284.p01
BMY_1283		penicillin-binding protein 1C	1	1	1	1	3142	63	3		161	161	161		BMY_1283.p01
BMY_0906		penicillin-binding protein 2	1	1	1	1	1087	283	1		749	749	749		BMY_0906.p01
BMY_0210		penicillin-insensitive murein endopeptidase	1	1	1	1	1641	1	160		380	380	380		BMY_0210.p01
group_2000	prfB	peptide chain release factor 2	15	15	1	1	1337	22	3		71	71	71			a04b031c37c06570dd644ef46d09ac8c_4843	2cf5bec40a3ef4476bf46f509f729c16_3631	102e21fe2bbcace64a7555dd0bcc9007_4024	4a9cac2c1a817d9acdec143b653b9a80_2020	ac8fed72b32d7540cf9a1b9ac12df95a_5047	197b0243bc5bc4c380ecfb8919a026b1_3523	79ccbe49faa72747a800162f6a36c0ca_5461	614e29224da4f337b8899b3142d81070_5611	d977e7edc1a56720a787e465ab4ce472_5733	e653c257947c2dd0a414de7cb159ba14_5717	31e4ba73e5ddb8c85dea419204f0df5a_4602	752b3971131f3206662b5e22da3b23aa_5745	83683a6c7ca473684645e0830a47223d_5812	03da1bd30b32560bef8e38ea7761d9fe_4108	c648bd7c3a222aa51bed3e3836bcf8c8_3168
J7560_09880		peptide transporter	10	10	1	1	2975	1	880		547	635	608		BMY_2154.p01		2cf5bec40a3ef4476bf46f509f729c16_7811			ac8fed72b32d7540cf9a1b9ac12df95a_7861						31e4ba73e5ddb8c85dea419204f0df5a_7950					B9T21_09790.p01	B9T15_10030.p01	B9T14_10000.p01	B9T11_10160.p01		B9T18_10015.p01		F387_02005.p01
B9T14_02610		phage baseplate assembly protein V	13	13	1	1	580	1	1318		632	632	632	B9T10_02295.p01		a04b031c37c06570dd644ef46d09ac8c_5503							614e29224da4f337b8899b3142d81070_2203	d977e7edc1a56720a787e465ab4ce472_2216	e653c257947c2dd0a414de7cb159ba14_2203			83683a6c7ca473684645e0830a47223d_465	03da1bd30b32560bef8e38ea7761d9fe_7622	c648bd7c3a222aa51bed3e3836bcf8c8_1952		B9T15_02425.p01	B9T14_02610.p01	B9T11_08700.p01		B9T18_01635.p01			A6V30_07080.p01
J7620_09355		phage capsid protein	15	15	1	1	2378	1	53		798	974	962	B9T10_03645.p01		a04b031c37c06570dd644ef46d09ac8c_4599				ac8fed72b32d7540cf9a1b9ac12df95a_4212			614e29224da4f337b8899b3142d81070_1911	d977e7edc1a56720a787e465ab4ce472_1924	e653c257947c2dd0a414de7cb159ba14_1911		752b3971131f3206662b5e22da3b23aa_7427	83683a6c7ca473684645e0830a47223d_757	03da1bd30b32560bef8e38ea7761d9fe_8002		B9T21_10120.p01	B9T15_03785.p01	B9T14_01255.p01	B9T11_04935.p01	B9T12_04760.p01		B9T13_09885.p01
J7558_09935		phage gp6-like head-tail connector protein	9	9	1	1	2339	1	1783		314	314	314			a04b031c37c06570dd644ef46d09ac8c_7881				ac8fed72b32d7540cf9a1b9ac12df95a_7710		79ccbe49faa72747a800162f6a36c0ca_6900				31e4ba73e5ddb8c85dea419204f0df5a_560	752b3971131f3206662b5e22da3b23aa_7689		03da1bd30b32560bef8e38ea7761d9fe_7483					B9T11_07845.p01		B9T18_01470.p01	B9T13_02860.p01
J7553_09740		phage head closure protein	8	8	1	1	2338	1	1782		308	323	321							ac8fed72b32d7540cf9a1b9ac12df95a_7714		79ccbe49faa72747a800162f6a36c0ca_6896				31e4ba73e5ddb8c85dea419204f0df5a_564	752b3971131f3206662b5e22da3b23aa_7685		03da1bd30b32560bef8e38ea7761d9fe_7487					B9T11_07840.p01		B9T18_01475.p01	B9T13_02855.p01
J7620_09700		phage major capsid protein	9	9	1	1	2341	1	1785		1223	1223	1223			a04b031c37c06570dd644ef46d09ac8c_7889				ac8fed72b32d7540cf9a1b9ac12df95a_7702		79ccbe49faa72747a800162f6a36c0ca_6908				31e4ba73e5ddb8c85dea419204f0df5a_552	752b3971131f3206662b5e22da3b23aa_7697		03da1bd30b32560bef8e38ea7761d9fe_7475					B9T11_07855.p01		B9T18_01460.p01	B9T13_02870.p01
J7606_02730		phage major tail tube protein	13	13	1	1	1784	1	1305		518	518	518	B9T10_02260.p01		a04b031c37c06570dd644ef46d09ac8c_5471							614e29224da4f337b8899b3142d81070_2171	d977e7edc1a56720a787e465ab4ce472_2184	e653c257947c2dd0a414de7cb159ba14_2171			83683a6c7ca473684645e0830a47223d_497	03da1bd30b32560bef8e38ea7761d9fe_7654	c648bd7c3a222aa51bed3e3836bcf8c8_1984		B9T15_02460.p01	B9T14_02575.p01	B9T11_08665.p01		B9T18_01670.p01			A6V30_07115.p01
B9T12_04830		phage minor tail protein L	13	13	1	1	2398	1	28		716	716	716	B9T10_03585.p01		a04b031c37c06570dd644ef46d09ac8c_4551				ac8fed72b32d7540cf9a1b9ac12df95a_4164			614e29224da4f337b8899b3142d81070_1855	d977e7edc1a56720a787e465ab4ce472_1868	e653c257947c2dd0a414de7cb159ba14_1855		752b3971131f3206662b5e22da3b23aa_7372	83683a6c7ca473684645e0830a47223d_813			B9T21_02825.p01	B9T15_03725.p01	B9T14_01315.p01	B9T11_04875.p01	B9T12_04830.p01
J7553_09800		phage minor tail protein L	6	6	1	1	2427	1	1753		719	719	719							ac8fed72b32d7540cf9a1b9ac12df95a_7761		79ccbe49faa72747a800162f6a36c0ca_6853							03da1bd30b32560bef8e38ea7761d9fe_7535					B9T11_07785.p01		B9T18_01530.p01	B9T13_02800.p01
B9T11_08765		phage portal protein	13	13	1	1	598	1	1333		959	965	961	B9T10_02360.p01		a04b031c37c06570dd644ef46d09ac8c_5554							614e29224da4f337b8899b3142d81070_2255	d977e7edc1a56720a787e465ab4ce472_2268	e653c257947c2dd0a414de7cb159ba14_2255			83683a6c7ca473684645e0830a47223d_413	03da1bd30b32560bef8e38ea7761d9fe_7571	c648bd7c3a222aa51bed3e3836bcf8c8_1900		B9T15_02360.p01	B9T14_02675.p01	B9T11_08765.p01		B9T18_01570.p01			A6V30_07015.p01
J7553_09715		phage portal protein	9	9	1	1	2343	1	1787		1229	1229	1229			a04b031c37c06570dd644ef46d09ac8c_7897				ac8fed72b32d7540cf9a1b9ac12df95a_7694		79ccbe49faa72747a800162f6a36c0ca_6916				31e4ba73e5ddb8c85dea419204f0df5a_544	752b3971131f3206662b5e22da3b23aa_7705		03da1bd30b32560bef8e38ea7761d9fe_7467					B9T11_07865.p01		B9T18_01450.p01	B9T13_02880.p01
bet		phage recombination protein Bet	16	16	1	1	1480	1	1639		365	773	741		BMY_0005.p01	a04b031c37c06570dd644ef46d09ac8c_5344	2cf5bec40a3ef4476bf46f509f729c16_3859			ac8fed72b32d7540cf9a1b9ac12df95a_4327			614e29224da4f337b8899b3142d81070_2039	d977e7edc1a56720a787e465ab4ce472_2052	e653c257947c2dd0a414de7cb159ba14_2039		752b3971131f3206662b5e22da3b23aa_7590	83683a6c7ca473684645e0830a47223d_629	03da1bd30b32560bef8e38ea7761d9fe_3879		B9T21_10060.p01	B9T15_03935.p01	B9T14_01105.p01	B9T11_05070.p01	B9T12_04610.p01		B9T13_10035.p01
BMY_0049		phage recombination protein Bet	1	1	1	1	1470	1	1623		773	773	773		BMY_0049.p01
BMY_2111		phage recombination protein Bet	1	1	1	1	2292	1	1728		773	773	773		BMY_2111.p01
J7553_09760		phage tail assembly chaperone family protein, TAC	8	8	1	1	2333	1	1777		311	311	311							ac8fed72b32d7540cf9a1b9ac12df95a_7730		79ccbe49faa72747a800162f6a36c0ca_6880				31e4ba73e5ddb8c85dea419204f0df5a_580	752b3971131f3206662b5e22da3b23aa_7670		03da1bd30b32560bef8e38ea7761d9fe_7503					B9T11_07820.p01		B9T18_01495.p01	B9T13_02830.p01
B9T15_02465		phage tail assembly protein	13	13	1	1	1785	1	1304		302	302	302	B9T10_02255.p01		a04b031c37c06570dd644ef46d09ac8c_5467							614e29224da4f337b8899b3142d81070_2167	d977e7edc1a56720a787e465ab4ce472_2180	e653c257947c2dd0a414de7cb159ba14_2167			83683a6c7ca473684645e0830a47223d_501	03da1bd30b32560bef8e38ea7761d9fe_7658	c648bd7c3a222aa51bed3e3836bcf8c8_1988		B9T15_02465.p01	B9T14_02570.p01	B9T11_08660.p01		B9T18_01675.p01			A6V30_07120.p01
B9T21_02830		phage tail protein	13	13	1	1	2397	1	29		335	335	335	B9T10_03590.p01		a04b031c37c06570dd644ef46d09ac8c_4555				ac8fed72b32d7540cf9a1b9ac12df95a_4168			614e29224da4f337b8899b3142d81070_1859	d977e7edc1a56720a787e465ab4ce472_1872	e653c257947c2dd0a414de7cb159ba14_1859		752b3971131f3206662b5e22da3b23aa_7376	83683a6c7ca473684645e0830a47223d_809			B9T21_02830.p01	B9T15_03730.p01	B9T14_01310.p01	B9T11_04880.p01	B9T12_04825.p01
J7606_02715		phage tail protein	13	13	1	1	1787	1	1302		434	434	434	B9T10_02245.p01		a04b031c37c06570dd644ef46d09ac8c_5459							614e29224da4f337b8899b3142d81070_2159	d977e7edc1a56720a787e465ab4ce472_2172	e653c257947c2dd0a414de7cb159ba14_2159			83683a6c7ca473684645e0830a47223d_509	03da1bd30b32560bef8e38ea7761d9fe_7666	c648bd7c3a222aa51bed3e3836bcf8c8_1996		B9T15_02475.p01	B9T14_02560.p01	B9T11_08650.p01		B9T18_01685.p01			A6V30_07130.p01
J7624_09685		phage tail protein	3	3	1	1	516	1	214		347	347	347				2cf5bec40a3ef4476bf46f509f729c16_7607												03da1bd30b32560bef8e38ea7761d9fe_7682								B9T13_09860.p01
J7624_09600		phage tail protein	2	2	1	1	581	1	1319		356	356	356			a04b031c37c06570dd644ef46d09ac8c_5511													03da1bd30b32560bef8e38ea7761d9fe_7615
B9T15_02440		phage tail protein I	13	13	1	1	577	1	1315		566	581	571	B9T10_02280.p01		a04b031c37c06570dd644ef46d09ac8c_5491							614e29224da4f337b8899b3142d81070_2191	d977e7edc1a56720a787e465ab4ce472_2204	e653c257947c2dd0a414de7cb159ba14_2191			83683a6c7ca473684645e0830a47223d_477	03da1bd30b32560bef8e38ea7761d9fe_7634	c648bd7c3a222aa51bed3e3836bcf8c8_1964		B9T15_02440.p01	B9T14_02595.p01	B9T11_08685.p01		B9T18_01650.p01			A6V30_07095.p01
J7622_00625		phage tail sheath subtilisin-like domain-containing protein	13	13	1	1	1783	1	1308		1172	1172	1172	B9T10_02265.p01		a04b031c37c06570dd644ef46d09ac8c_5475							614e29224da4f337b8899b3142d81070_2175	d977e7edc1a56720a787e465ab4ce472_2188	e653c257947c2dd0a414de7cb159ba14_2175			83683a6c7ca473684645e0830a47223d_493	03da1bd30b32560bef8e38ea7761d9fe_7650	c648bd7c3a222aa51bed3e3836bcf8c8_1980		B9T15_02455.p01	B9T14_02580.p01	B9T11_08670.p01		B9T18_01665.p01			A6V30_07110.p01
J7606_02720		phage tail tape measure protein	10	10	1	1	1786	1	1303		2177	2186	2179	B9T10_02250.p01									614e29224da4f337b8899b3142d81070_2163	d977e7edc1a56720a787e465ab4ce472_2176	e653c257947c2dd0a414de7cb159ba14_2163			83683a6c7ca473684645e0830a47223d_505	03da1bd30b32560bef8e38ea7761d9fe_7662	c648bd7c3a222aa51bed3e3836bcf8c8_1992				B9T11_08655.p01		B9T18_01680.p01			A6V30_07125.p01
J7553_09770		phage tail tape measure protein	7	7	1	1	2331	1	1770		3044	3047	3044							ac8fed72b32d7540cf9a1b9ac12df95a_7738		79ccbe49faa72747a800162f6a36c0ca_6873					752b3971131f3206662b5e22da3b23aa_7662		03da1bd30b32560bef8e38ea7761d9fe_7511					B9T11_07810.p01		B9T18_01505.p01	B9T13_02820.p01
B9T14_02565		phage tail tape measure protein	3	3	1	1	1775	1	1244		2183	2186	2185			a04b031c37c06570dd644ef46d09ac8c_5463																B9T15_02470.p01	B9T14_02565.p01
J7607_00745		phage tail tape measure protein	1	1	1	1	2327	1	1775		3101	3101	3101													31e4ba73e5ddb8c85dea419204f0df5a_588
B143_RS0102485		phage virion morphogenesis protein	13	13	1	1	582	1	1320		434	452	439	B9T10_02300.p01		a04b031c37c06570dd644ef46d09ac8c_5507							614e29224da4f337b8899b3142d81070_2207	d977e7edc1a56720a787e465ab4ce472_2220	e653c257947c2dd0a414de7cb159ba14_2207			83683a6c7ca473684645e0830a47223d_461	03da1bd30b32560bef8e38ea7761d9fe_7618	c648bd7c3a222aa51bed3e3836bcf8c8_1948		B9T15_02420.p01	B9T14_02615.p01	B9T11_08705.p01		B9T18_01630.p01			A6V30_07075.p01
B9T18_01015		phophatidylserine decarboxylase associated domain-containing protein	2	2	1	1	2928	1	702		1361	1361	1361									79ccbe49faa72747a800162f6a36c0ca_1952														B9T18_01015.p01
J7553_02220		phosphatidylserine decarboxylase family protein	1	1	1	1	2843	41	2		1247	1247	1247							ac8fed72b32d7540cf9a1b9ac12df95a_1761
J7560_01835		phosphoadenosine phosphosulfate reductase family protein	18	18	1	1	738	1	253		830	833	832	B9T10_07845.p01	BMY_1159.p01		2cf5bec40a3ef4476bf46f509f729c16_1461	102e21fe2bbcace64a7555dd0bcc9007_1953	4a9cac2c1a817d9acdec143b653b9a80_6274		197b0243bc5bc4c380ecfb8919a026b1_2198		614e29224da4f337b8899b3142d81070_3245	d977e7edc1a56720a787e465ab4ce472_4368	e653c257947c2dd0a414de7cb159ba14_4351	31e4ba73e5ddb8c85dea419204f0df5a_3244	752b3971131f3206662b5e22da3b23aa_2817	83683a6c7ca473684645e0830a47223d_3947				B9T15_07680.p01	B9T14_07650.p01		B9T12_05085.p01		B9T13_06345.p01	F387_01812.p01	A6V30_00210.p01
J7558_00880		phosphodiester glycosidase family protein	24	24	1	1	1682	1	1418		734	734	734	B9T10_01855.p01	BMY_0252.p01	a04b031c37c06570dd644ef46d09ac8c_699	2cf5bec40a3ef4476bf46f509f729c16_677		4a9cac2c1a817d9acdec143b653b9a80_1177	ac8fed72b32d7540cf9a1b9ac12df95a_621	197b0243bc5bc4c380ecfb8919a026b1_630	79ccbe49faa72747a800162f6a36c0ca_1099	614e29224da4f337b8899b3142d81070_621	d977e7edc1a56720a787e465ab4ce472_634	e653c257947c2dd0a414de7cb159ba14_621	31e4ba73e5ddb8c85dea419204f0df5a_1756	752b3971131f3206662b5e22da3b23aa_1105	83683a6c7ca473684645e0830a47223d_2047	03da1bd30b32560bef8e38ea7761d9fe_1241	c648bd7c3a222aa51bed3e3836bcf8c8_2337	B9T21_01845.p01	B9T15_02865.p01	B9T14_02175.p01	B9T11_00885.p01		B9T18_03240.p01	B9T13_01860.p01	F387_00161.p01	A6V30_03470.p01
BMY_1532		phosphoglycerate kinase	1	1	1	1	3740	247	1		410	410	410		BMY_1532.p01
BMY_2089		phosphoribosylformylglycinamidine synthase	1	1	1	1	658	240	1		398	398	398		BMY_2089.p01
J7624_09730		phosphorylase	1	1	1	1	540	1	104		1526	1526	1526																03da1bd30b32560bef8e38ea7761d9fe_7718
BMY_0150		phosphoserine transaminase	1	1	1	1	1583	1	151		182	182	182		BMY_0150.p01
J7607_02055		PhoX family phosphatase	24	24	1	1	1719	1	1374		1961	1961	1961	B9T10_02025.p01	BMY_0292.p01	a04b031c37c06570dd644ef46d09ac8c_567	2cf5bec40a3ef4476bf46f509f729c16_545		4a9cac2c1a817d9acdec143b653b9a80_1045	ac8fed72b32d7540cf9a1b9ac12df95a_753	197b0243bc5bc4c380ecfb8919a026b1_762	79ccbe49faa72747a800162f6a36c0ca_967	614e29224da4f337b8899b3142d81070_753	d977e7edc1a56720a787e465ab4ce472_766	e653c257947c2dd0a414de7cb159ba14_753	31e4ba73e5ddb8c85dea419204f0df5a_1624		83683a6c7ca473684645e0830a47223d_1915	03da1bd30b32560bef8e38ea7761d9fe_1109	c648bd7c3a222aa51bed3e3836bcf8c8_2173	B9T21_02015.p01	B9T15_02695.p01	B9T14_02345.p01	B9T11_00715.p01	B9T12_02035.p01	B9T18_03070.p01	B9T13_02085.p01	F387_00196.p01	A6V30_03635.p01
J7600_09010		pilin	5	5	1	1	1109	53	4		521	521	521									79ccbe49faa72747a800162f6a36c0ca_6707	614e29224da4f337b8899b3142d81070_7153	d977e7edc1a56720a787e465ab4ce472_7272	e653c257947c2dd0a414de7cb159ba14_7264			83683a6c7ca473684645e0830a47223d_7476
J7552_08310		pilin	5	5	1	1	706	53	3		518	521	520								197b0243bc5bc4c380ecfb8919a026b1_6599		614e29224da4f337b8899b3142d81070_7157	d977e7edc1a56720a787e465ab4ce472_7276	e653c257947c2dd0a414de7cb159ba14_7268			83683a6c7ca473684645e0830a47223d_7472
B9T12_06375		pilin	4	4	1	1	1114	305	1		590	590	590		BMY_0888.p01	a04b031c37c06570dd644ef46d09ac8c_6809													03da1bd30b32560bef8e38ea7761d9fe_6904						B9T12_06375.p01
A6V30_01520		pilin	3	3	1	1	1113	157	1		542	548	545																	c648bd7c3a222aa51bed3e3836bcf8c8_5192							B9T13_07645.p01		A6V30_01520.p01
J7553_08285		pilin	2	2	1	1	1104	47	5		446	446	446							ac8fed72b32d7540cf9a1b9ac12df95a_6578							752b3971131f3206662b5e22da3b23aa_6547
J7561_04310		pilin	2	2	1	1	703	79	1		440	440	440					102e21fe2bbcace64a7555dd0bcc9007_6274	4a9cac2c1a817d9acdec143b653b9a80_3433
J7547_07895		pilin	2	2	1	1	704	79	2		545	545	545					102e21fe2bbcace64a7555dd0bcc9007_6278	4a9cac2c1a817d9acdec143b653b9a80_3437
J7620_08230		pilin	2	2	1	1	1105	47	3		464	464	464							ac8fed72b32d7540cf9a1b9ac12df95a_6574							752b3971131f3206662b5e22da3b23aa_6543
J7560_08815		pilin	1	1	1	1	1112	67	3		473	473	473				2cf5bec40a3ef4476bf46f509f729c16_6980
J7560_08820		pilin	1	1	1	1	1111	67	2		482	482	482				2cf5bec40a3ef4476bf46f509f729c16_6984
J7560_08825		pilin	1	1	1	1	709	67	1		503	503	503				2cf5bec40a3ef4476bf46f509f729c16_6988
J7553_08290		pilin	1	1	1	1	708	47	4		440	440	440							ac8fed72b32d7540cf9a1b9ac12df95a_6582
J7552_08305		pilin	1	1	1	1	707	53	2		524	524	524								197b0243bc5bc4c380ecfb8919a026b1_6595
J7554_08435		pilin	1	1	1	1	1110	53	1		515	515	515									79ccbe49faa72747a800162f6a36c0ca_6703
J7607_08350		pilin	1	1	1	1	1118	112	1		521	521	521													31e4ba73e5ddb8c85dea419204f0df5a_6634
J7607_08355		pilin	1	1	1	1	1117	112	2		518	518	518													31e4ba73e5ddb8c85dea419204f0df5a_6638
J7620_08240		pilin	1	1	1	1	701	47	2		419	419	419														752b3971131f3206662b5e22da3b23aa_6551
J7620_08245		pilin	1	1	1	1	702	47	1		440	440	440														752b3971131f3206662b5e22da3b23aa_6555
B9T13_08685		pilus assembly protein PilQ	6	6	1	1	2757	149	1		2051	2060	2052	B9T10_04760.p01								79ccbe49faa72747a800162f6a36c0ca_2439										B9T15_00350.p01	B9T14_04675.p01				B9T13_08685.p01		A6V30_05585.p01
mobC		plasmid mobilization relaxosome protein MobC	7	7	1	1	2060	1	850		248	365	314				2cf5bec40a3ef4476bf46f509f729c16_7693	102e21fe2bbcace64a7555dd0bcc9007_7831	4a9cac2c1a817d9acdec143b653b9a80_7835	ac8fed72b32d7540cf9a1b9ac12df95a_7837						31e4ba73e5ddb8c85dea419204f0df5a_7886												F387_02008.p01	A6V30_10015.p01
B9T12_06795		PLP-dependent aminotransferase family protein	24	24	1	1	3704	109	2		971	1223	1202		BMY_1566.p01	a04b031c37c06570dd644ef46d09ac8c_3236	2cf5bec40a3ef4476bf46f509f729c16_2324	102e21fe2bbcace64a7555dd0bcc9007_2878	4a9cac2c1a817d9acdec143b653b9a80_4489	ac8fed72b32d7540cf9a1b9ac12df95a_4078	197b0243bc5bc4c380ecfb8919a026b1_2370		614e29224da4f337b8899b3142d81070_4401	d977e7edc1a56720a787e465ab4ce472_2376	e653c257947c2dd0a414de7cb159ba14_3457	31e4ba73e5ddb8c85dea419204f0df5a_3424	752b3971131f3206662b5e22da3b23aa_3674	83683a6c7ca473684645e0830a47223d_2686	03da1bd30b32560bef8e38ea7761d9fe_3793	c648bd7c3a222aa51bed3e3836bcf8c8_4226	B9T21_03815.p01	B9T15_05950.p01	B9T14_05920.p01	B9T11_03935.p01	B9T12_06795.p01	B9T18_06615.p01	B9T13_04570.p01	F387_01514.p01	A6V30_08785.p01
B143_RS0104025		PLP-dependent aminotransferase family protein	1	1	1	1	1348	84	1		1415	1415	1415																	c648bd7c3a222aa51bed3e3836bcf8c8_3132
BMY_1545		PLP-dependent threonine dehydratase	1	1	1	1	356	193	1		539	539	539		BMY_1545.p01
J7554_06295		polysaccharide biosynthesis protein	10	10	1	1	32	1	574		1397	1970	1907	B9T10_05765.p01								79ccbe49faa72747a800162f6a36c0ca_5002	614e29224da4f337b8899b3142d81070_4667	d977e7edc1a56720a787e465ab4ce472_5034	e653c257947c2dd0a414de7cb159ba14_4767		752b3971131f3206662b5e22da3b23aa_5075	83683a6c7ca473684645e0830a47223d_5345							B9T12_08480.p01		B9T13_04255.p01		A6V30_08420.p01
BMY_1500		polysaccharide biosynthesis protein	1	1	1	1	96	1	682		1259	1259	1259		BMY_1500.p01
A6V30_08470		polysaccharide biosynthesis protein	1	1	1	1	2247	1	584		1256	1256	1256																										A6V30_08470.p01
B9T21_07505		polysaccharide biosynthesis/export family protein	9	9	1	1	2671	4	22		1118	1118	1118					102e21fe2bbcace64a7555dd0bcc9007_5462	4a9cac2c1a817d9acdec143b653b9a80_5497		197b0243bc5bc4c380ecfb8919a026b1_5186		614e29224da4f337b8899b3142d81070_6076	d977e7edc1a56720a787e465ab4ce472_6197	e653c257947c2dd0a414de7cb159ba14_6183	31e4ba73e5ddb8c85dea419204f0df5a_5360		83683a6c7ca473684645e0830a47223d_6489			B9T21_07505.p01
J7561_05940		polysaccharide pyruvyl transferase family protein	2	2	1	1	66	1	652		863	863	863					102e21fe2bbcace64a7555dd0bcc9007_4976	4a9cac2c1a817d9acdec143b653b9a80_4731
J7553_08690		polysaccharide pyruvyl transferase family protein	1	1	1	1	326	1	632		1163	1163	1163							ac8fed72b32d7540cf9a1b9ac12df95a_6897
J7606_05820		porin	4	4	1	1	355	261	1		1169	1169	1169										614e29224da4f337b8899b3142d81070_4515	d977e7edc1a56720a787e465ab4ce472_5186	e653c257947c2dd0a414de7cb159ba14_4616			83683a6c7ca473684645e0830a47223d_5497
J7624_05835		porin	3	3	1	1	353	285	1		1160	1160	1160				2cf5bec40a3ef4476bf46f509f729c16_4609					79ccbe49faa72747a800162f6a36c0ca_5150							03da1bd30b32560bef8e38ea7761d9fe_4646
B9T21_03675		porin	3	3	1	1	344	185	1		1160	1169	1163					102e21fe2bbcace64a7555dd0bcc9007_5104	4a9cac2c1a817d9acdec143b653b9a80_4603												B9T21_03675.p01
B9T11_04080		porin	3	3	1	1	346	175	1		1166	1169	1167																			B9T15_05805.p01	B9T14_05775.p01	B9T11_04080.p01
B9T10_05935		porin	2	2	1	1	345	213	1		1181	1181	1181	B9T10_05935.p01													752b3971131f3206662b5e22da3b23aa_5215
B9T18_06755		porin	2	2	1	1	3734	200	1		1178	1181	1179			a04b031c37c06570dd644ef46d09ac8c_3350																				B9T18_06755.p01
J7553_08530		porin	1	1	1	1	350	127	1		1151	1151	1151							ac8fed72b32d7540cf9a1b9ac12df95a_6770
J7552_06075		porin	1	1	1	1	349	142	1		1124	1124	1124								197b0243bc5bc4c380ecfb8919a026b1_4834
J7607_09240		porin	1	1	1	1	343	140	1		1124	1124	1124													31e4ba73e5ddb8c85dea419204f0df5a_7337
B143_RS0105265		porin	1	1	1	1	354	173	1		1193	1193	1193																	c648bd7c3a222aa51bed3e3836bcf8c8_4112
B9T12_06655		porin	1	1	1	1	351	223	1		1205	1205	1205																						B9T12_06655.p01
B9T13_04425		porin	1	1	1	1	352	203	1		1211	1211	1211																								B9T13_04425.p01
A6V30_05810		porin family protein	3	3	1	1	2679	58	2		758	758	758									79ccbe49faa72747a800162f6a36c0ca_7390					752b3971131f3206662b5e22da3b23aa_7561												A6V30_05810.p01
B143_RS09900		porin family protein	1	1	1	1	3061	297	1		611	611	611																	c648bd7c3a222aa51bed3e3836bcf8c8_6837
B9T14_08950		prepilin-type cleavage/methylation domain-containing protein	3	3	1	1	1116	196	1		572	572	572	B9T10_09215.p01																		B9T15_08980.p01	B9T14_08950.p01
J7552_03040		prepilin-type N-terminal cleavage/methylation domain-containing protein	1	1	1	1	3695	309	1		203	203	203								197b0243bc5bc4c380ecfb8919a026b1_2413
BMY_1744		preprotein translocase subunit SecA	1	1	1	1	387	280	1		803	803	803		BMY_1744.p01
J7554_09500		prevent-host-death protein	2	2	1	1	2067	1	738		257	257	257									79ccbe49faa72747a800162f6a36c0ca_7531																	A6V30_10105.p01
BMY_1378		protein phnA	1	1	1	1	134	167	1		263	263	263		BMY_1378.p01
J7624_09485		protein phosphatase 2C domain-containing protein	1	1	1	1	2421	1	1767		791	791	791																03da1bd30b32560bef8e38ea7761d9fe_7523
A6V30_07820		protein pilG	1	1	1	1	193	3	32		371	371	371																										A6V30_07820.p01
A6V30_07810		protein pilJ	1	1	1	1	191	3	46		1460	1460	1460																										A6V30_07810.p01
B9T18_09435		protein tyrosine phosphatase	1	1	1	1	3175	39	10		479	479	479																							B9T18_09435.p01
J7620_09795		pseudoazurin	3	3	1	1	2959	1	446		434	434	434								197b0243bc5bc4c380ecfb8919a026b1_7751						752b3971131f3206662b5e22da3b23aa_7769										B9T13_10245.p01
F387_01452		Putative glycosyltransferase epsE	1	1	1	1	59	1	610		755	755	755																									F387_01452.p01
F387_01196		Putative prophage CPZ-55 integrase	1	1	1	1	2526	43	2		1235	1235	1235																									F387_01196.p01
F387_01957		Putative protein YbeQ	1	1	1	1	2074	1	493		776	776	776																									F387_01957.p01
F387_01994		Putative protein YbeQ	1	1	1	1	3215	1	781		794	794	794																									F387_01994.p01
J7558_10030		Putative replication protein	2	2	1	1	2090	1	501		1055	1067	1061			a04b031c37c06570dd644ef46d09ac8c_7957																						F387_01969.p01
F387_01962		Putative sulfate transporter ybaR	1	1	1	1	2096	1	734		1487	1487	1487																									F387_01962.p01
F387_01821		Putative transposase for insertion sequence element IS6501	3	3	1	1	836	1	283		383	488	453		BMY_1154.p01																							F387_01821.p01	A6V30_00250.p01
J7547_02425		putrescine aminotransferase	14	14	1	1	744	1	242		1358	1358	1358		BMY_1164.p01		2cf5bec40a3ef4476bf46f509f729c16_1441	102e21fe2bbcace64a7555dd0bcc9007_1933	4a9cac2c1a817d9acdec143b653b9a80_6294		197b0243bc5bc4c380ecfb8919a026b1_2218		614e29224da4f337b8899b3142d81070_3265	d977e7edc1a56720a787e465ab4ce472_4388	e653c257947c2dd0a414de7cb159ba14_4371		752b3971131f3206662b5e22da3b23aa_2797	83683a6c7ca473684645e0830a47223d_3927				B9T15_07655.p01	B9T14_07625.p01				B9T13_06320.p01	F387_01807.p01
BMY_0284		pyruvate carboxylase	1	1	1	1	609	1	167		782	782	782		BMY_0284.p01
BMY_0497		pyruvate dehydrogenase (acetyl-transferring), homodimeric type	1	1	1	1	3327	1	1066		419	419	419		BMY_0497.p01
BMY_0447		quinolinate synthase A	1	1	1	1	561	1	192		428	428	428		BMY_0447.p01
nadA		quinolinate synthase NadA	18	18	1	1	1935	1	1129		620	1022	999	B9T10_02860.p01	BMY_0446.p01	a04b031c37c06570dd644ef46d09ac8c_47	2cf5bec40a3ef4476bf46f509f729c16_25		4a9cac2c1a817d9acdec143b653b9a80_525	ac8fed72b32d7540cf9a1b9ac12df95a_1273	197b0243bc5bc4c380ecfb8919a026b1_1280		614e29224da4f337b8899b3142d81070_1275	d977e7edc1a56720a787e465ab4ce472_1288	e653c257947c2dd0a414de7cb159ba14_1275	31e4ba73e5ddb8c85dea419204f0df5a_1104	752b3971131f3206662b5e22da3b23aa_451	83683a6c7ca473684645e0830a47223d_1393	03da1bd30b32560bef8e38ea7761d9fe_589	c648bd7c3a222aa51bed3e3836bcf8c8_1499	B9T21_02665.p01				B9T12_02675.p01			F387_00333.p01
J7561_09700		radical SAM protein	2	2	1	1	399	1	378		581	581	581					102e21fe2bbcace64a7555dd0bcc9007_7745	4a9cac2c1a817d9acdec143b653b9a80_7695
B9T21_09930		recombinase	1	1	1	1	1410	1	1637		198	198	198																		B9T21_09930.p01
B9T21_10085		recombinase	1	1	1	1	1396	1	1590		198	198	198																		B9T21_10085.p01
B9T14_10005		recombinase family protein	16	16	1	1	2974	1	881		602	602	602		BMY_2153.p01		2cf5bec40a3ef4476bf46f509f729c16_7815	102e21fe2bbcace64a7555dd0bcc9007_7882	4a9cac2c1a817d9acdec143b653b9a80_7878	ac8fed72b32d7540cf9a1b9ac12df95a_7865	197b0243bc5bc4c380ecfb8919a026b1_7771	79ccbe49faa72747a800162f6a36c0ca_7576				31e4ba73e5ddb8c85dea419204f0df5a_7946	752b3971131f3206662b5e22da3b23aa_7749				B9T21_09795.p01	B9T15_10035.p01	B9T14_10005.p01	B9T11_10165.p01		B9T18_10020.p01		F387_02004.p01	A6V30_10080.p01
J7558_09150		recombinase family protein	1	1	1	1	418	1	389		149	149	149			a04b031c37c06570dd644ef46d09ac8c_7263
group_1985	recA	recombinase RecA	1	1	1	1	148	130	1		1052	1052	1052			a04b031c37c06570dd644ef46d09ac8c_3939
B9T13_03555		recombinase RecF	4	4	1	1	2499	1	973		1094	1094	1094																			B9T15_01280.p01	B9T14_03750.p01	B9T11_08535.p01			B9T13_03555.p01
A6V30_04915		recombinase RecF	2	2	1	1	2307	1	1661		655	1061	858									79ccbe49faa72747a800162f6a36c0ca_7697																	A6V30_04915.p01
group_2489	rdgC	recombination-associated protein RdgC	1	1	1	1	1422	1	1861		893	893	893													31e4ba73e5ddb8c85dea419204f0df5a_425
J7624_07670		RelA/SpoT domain-containing protein	3	3	1	1	2162	1	1837		1043	1043	1043							ac8fed72b32d7540cf9a1b9ac12df95a_4256									03da1bd30b32560bef8e38ea7761d9fe_6094					B9T11_04990.p01
J7607_00560		RelA/SpoT domain-containing protein	1	1	1	1	1426	1	1865		1061	1061	1061													31e4ba73e5ddb8c85dea419204f0df5a_441
BMY_0823		RelA/SpoT family protein	1	1	1	1	2677	102	1		1724	1724	1724		BMY_0823.p01
B9T14_09885		RepB family plasmid replication initiator protein	7	7	1	1	3248	1	861		1058	1067	1060								197b0243bc5bc4c380ecfb8919a026b1_7918					31e4ba73e5ddb8c85dea419204f0df5a_7800						B9T15_09915.p01	B9T14_09885.p01			B9T18_09965.p01		F387_02054.p01	A6V30_10380.p01
B9T18_10105		RepB family plasmid replication initiator protein	4	4	1	1	2985	1	837		497	1034	866		BMY_2126.p01							79ccbe49faa72747a800162f6a36c0ca_7521									B9T21_09685.p01					B9T18_10105.p01
B9T21_09665		RepB family plasmid replication initiator protein	2	2	1	1	3212	1	779		1024	1046	1035							ac8fed72b32d7540cf9a1b9ac12df95a_7999											B9T21_09665.p01
B9T15_09870		RepB family plasmid replication initiator protein	2	2	1	1	2048	1	763		1031	1031	1031																			B9T15_09870.p01	B9T14_09840.p01
repM		replication initiation protein RepM	6	6	1	1	2040	1	470		878	887	884					102e21fe2bbcace64a7555dd0bcc9007_7932	4a9cac2c1a817d9acdec143b653b9a80_7918		197b0243bc5bc4c380ecfb8919a026b1_7812										B9T21_09740.p01							F387_02040.p01	A6V30_10180.p01
B9T13_10375		replication initiation protein RepM	3	3	1	1	3255	1	736		887	1028	936													31e4ba73e5ddb8c85dea419204f0df5a_7796											B9T13_10375.p01	F387_01960.p01
group_2192	repM	replication initiation protein RepM	2	2	1	2	3	46	6		893	893	893					102e21fe2bbcace64a7555dd0bcc9007_7914	4a9cac2c1a817d9acdec143b653b9a80_7964
group_1364	repM	replication initiation protein RepM	1	1	1	1	2042	1	452		887	887	887				2cf5bec40a3ef4476bf46f509f729c16_7729
group_2272	repM	replication initiation protein RepM	1	1	1	5	2	65	2		914	914	914							ac8fed72b32d7540cf9a1b9ac12df95a_7965
J7560_09860		replication initiator protein A	7	7	1	1	3253	1	784		1049	1055	1052				2cf5bec40a3ef4476bf46f509f729c16_7795			ac8fed72b32d7540cf9a1b9ac12df95a_7819						31e4ba73e5ddb8c85dea419204f0df5a_7825	752b3971131f3206662b5e22da3b23aa_7873							B9T11_10185.p01				F387_01997.p01	A6V30_10125.p01
BMY_2169		replication initiator protein A	3	3	1	1	2946	1	757		1064	1079	1069		BMY_2169.p01												752b3971131f3206662b5e22da3b23aa_7859											F387_01989.p01
J7620_09845		replication initiator protein A	2	2	1	1	2941	1	745		1052	1067	1059				2cf5bec40a3ef4476bf46f509f729c16_7839										752b3971131f3206662b5e22da3b23aa_7807
J7554_09585		replication initiator protein A	1	1	1	1	2213	1	747		1262	1262	1262									79ccbe49faa72747a800162f6a36c0ca_7594
J7620_09875		replication initiator protein A	1	1	1	1	2994	1	795		1067	1067	1067														752b3971131f3206662b5e22da3b23aa_7830
B9T18_10085		Replication protein	3	3	1	1	2123	1	762		896	896	896							ac8fed72b32d7540cf9a1b9ac12df95a_7947																B9T18_10085.p01	B9T13_10345.p01
F387_01986		Replication protein	2	2	1	1	2201	1	1882		890	1061	975																									F387_01986.p01	A6V30_10225.p01
BMY_2181		replication protein	1	1	1	1	3220	1	775		1031	1031	1031		BMY_2181.p01
BMY_2127		replication protein	1	1	1	1	2210	1	835		419	419	419		BMY_2127.p01
F387_02036		Replication protein	1	1	1	2	2	46	2		866	866	866																									F387_02036.p01
BMY_2187		replication protein	1	1	1	1	2116	1	769		365	365	365		BMY_2187.p01
A6V30_10330		replication protein	1	1	1	1	2110	1	818		1061	1061	1061																										A6V30_10330.p01
B9T15_10115		replication protein C	4	4	1	1	2237	1	533		257	845	698																			B9T15_10115.p01	B9T14_10085.p01			B9T18_10145.p01	B9T13_10125.p01
J7602_02305		RES family NAD+ phosphorylase	6	6	1	1	487	1	216		875	1019	972	B9T10_03540.p01									614e29224da4f337b8899b3142d81070_1819	d977e7edc1a56720a787e465ab4ce472_1832	e653c257947c2dd0a414de7cb159ba14_1819			83683a6c7ca473684645e0830a47223d_849									B9T13_09835.p01
B9T21_05095		response regulator	8	8	1	1	771	42	2		911	911	911	B9T10_07730.p01		a04b031c37c06570dd644ef46d09ac8c_2208	2cf5bec40a3ef4476bf46f509f729c16_1364				197b0243bc5bc4c380ecfb8919a026b1_2295					31e4ba73e5ddb8c85dea419204f0df5a_3349	752b3971131f3206662b5e22da3b23aa_2716		03da1bd30b32560bef8e38ea7761d9fe_1932		B9T21_05095.p01
J7554_08575		restriction endonuclease	1	1	1	1	2284	1	1704		3566	3566	3566									79ccbe49faa72747a800162f6a36c0ca_6813
J7607_04055		restriction endonuclease	1	1	1	1	729	1	225		575	575	575													31e4ba73e5ddb8c85dea419204f0df5a_3212
B9T13_10410		restriction endonuclease	1	1	1	11	1	91	1	Investigate	503	503	503																								B9T13_10410.p01
J7552_09505		restriction endonuclease subunit M	5	5	1	1	3266	1	1689		2240	2240	2240							ac8fed72b32d7540cf9a1b9ac12df95a_4731	197b0243bc5bc4c380ecfb8919a026b1_7540										B9T21_08825.p01					B9T18_01885.p01			A6V30_10000.p01
J7552_09515		restriction endonuclease subunit R	5	5	1	1	2276	1	1694		3239	3239	3239							ac8fed72b32d7540cf9a1b9ac12df95a_4739	197b0243bc5bc4c380ecfb8919a026b1_7548										B9T21_08815.p01					B9T18_01875.p01			A6V30_09990.p01
J7553_05185		restriction endonuclease subunit R	2	2	1	1	523	1	329		3092	3092	3092							ac8fed72b32d7540cf9a1b9ac12df95a_4116											B9T21_02765.p01
B9T13_10210		restriction endonuclease subunit R	2	2	1	1	2077	1	477		3440	3440	3440																								B9T13_10210.p01	F387_01949.p01
BMY_0021		restriction endonuclease subunit R	1	1	1	1	3396	1	45		3038	3038	3038		BMY_0021.p01
J7600_02230		restriction endonuclease subunit S	4	4	1	1	2496	1	983		1163	1163	1163										614e29224da4f337b8899b3142d81070_1771	d977e7edc1a56720a787e465ab4ce472_1784	e653c257947c2dd0a414de7cb159ba14_1771			83683a6c7ca473684645e0830a47223d_897
J7602_02285		restriction endonuclease subunit S	4	4	1	1	504	1	219		1187	1187	1187										614e29224da4f337b8899b3142d81070_1803	d977e7edc1a56720a787e465ab4ce472_1816	e653c257947c2dd0a414de7cb159ba14_1803			83683a6c7ca473684645e0830a47223d_865
J7622_08955		restriction endonuclease subunit S	4	4	1	1	3191	37	6		1733	1733	1733										614e29224da4f337b8899b3142d81070_6588	d977e7edc1a56720a787e465ab4ce472_6611	e653c257947c2dd0a414de7cb159ba14_6598			83683a6c7ca473684645e0830a47223d_7110
J7624_00110		restriction endonuclease subunit S	2	2	1	1	2495	1	982		1256	1256	1256			a04b031c37c06570dd644ef46d09ac8c_4487													03da1bd30b32560bef8e38ea7761d9fe_87
J7561_07810		restriction endonuclease subunit S	2	2	1	1	489	1	309		1220	1220	1220					102e21fe2bbcace64a7555dd0bcc9007_2017	4a9cac2c1a817d9acdec143b653b9a80_6211
J7560_06025		restriction endonuclease subunit S	1	1	1	1	2484	1	970		1190	1190	1190				2cf5bec40a3ef4476bf46f509f729c16_4778
J7560_06730		restriction endonuclease subunit S	1	1	1	1	2609	6	12		1517	1517	1517				2cf5bec40a3ef4476bf46f509f729c16_5331
J7560_09640		restriction endonuclease subunit S	1	1	1	1	505	1	311		1193	1193	1193				2cf5bec40a3ef4476bf46f509f729c16_7627
J7561_00040		restriction endonuclease subunit S	1	1	1	1	1960	1	797		1298	1298	1298						4a9cac2c1a817d9acdec143b653b9a80_31
J7553_05965		restriction endonuclease subunit S	1	1	1	1	3263	1	1692		1379	1379	1379							ac8fed72b32d7540cf9a1b9ac12df95a_4735
J7552_07410		restriction endonuclease subunit S	1	1	1	1	1964	1	798		1325	1325	1325								197b0243bc5bc4c380ecfb8919a026b1_5891
J7552_09510		restriction endonuclease subunit S	1	1	1	1	2272	1	1665		1328	1328	1328								197b0243bc5bc4c380ecfb8919a026b1_7544
J7607_00800		restriction endonuclease subunit S	1	1	1	1	2494	1	956		1256	1256	1256													31e4ba73e5ddb8c85dea419204f0df5a_630
J7624_09710		restriction endonuclease subunit S	1	1	1	1	502	1	106		1133	1133	1133																03da1bd30b32560bef8e38ea7761d9fe_7702
B9T21_09775		restriction endonuclease subunit S	1	1	1	1	2979	1	851		1175	1175	1175																		B9T21_09775.p01
A6V30_09995		restriction endonuclease subunit S	1	1	1	1	3265	1	1690		1316	1316	1316																										A6V30_09995.p01
BMY_0570		restriction modification system DNA specificity subunit	1	1	1	1	1959	1	803		1286	1286	1286		BMY_0570.p01
J7560_06070		ribonuclease H family protein	24	24	1	1	2007	1	994		683	695	683	B9T10_03450.p01	BMY_0573.p01	a04b031c37c06570dd644ef46d09ac8c_4447	2cf5bec40a3ef4476bf46f509f729c16_4812		4a9cac2c1a817d9acdec143b653b9a80_19	ac8fed72b32d7540cf9a1b9ac12df95a_4787	197b0243bc5bc4c380ecfb8919a026b1_5903	79ccbe49faa72747a800162f6a36c0ca_15	614e29224da4f337b8899b3142d81070_1743	d977e7edc1a56720a787e465ab4ce472_1756	e653c257947c2dd0a414de7cb159ba14_1743	31e4ba73e5ddb8c85dea419204f0df5a_642	752b3971131f3206662b5e22da3b23aa_7	83683a6c7ca473684645e0830a47223d_925	03da1bd30b32560bef8e38ea7761d9fe_127	c648bd7c3a222aa51bed3e3836bcf8c8_1025	B9T21_08755.p01	B9T15_01300.p01	B9T14_03730.p01	B9T11_08515.p01	B9T12_03265.p01		B9T13_03535.p01	F387_01154.p01	A6V30_04860.p01
BMY_0107		ribonuclease HII	1	1	1	1	1540	1	148		176	176	176		BMY_0107.p01
A6V30_07780		ribosomal large subunit pseudouridine synthase C	1	1	1	1	185	3	40		929	929	929																										A6V30_07780.p01
BMY_1764		ribosomal protein S12 methylthiotransferase RimO	1	1	1	1	3489	177	1		242	242	242		BMY_1764.p01
J7600_01635		ring-hydroxylating oxygenase subunit alpha	10	10	1	1	553	1	1113		1127	1127	1127	B9T10_02890.p01					4a9cac2c1a817d9acdec143b653b9a80_501				614e29224da4f337b8899b3142d81070_1297	d977e7edc1a56720a787e465ab4ce472_1310	e653c257947c2dd0a414de7cb159ba14_1297			83683a6c7ca473684645e0830a47223d_1371		c648bd7c3a222aa51bed3e3836bcf8c8_1475	B9T21_02695.p01					B9T18_02395.p01			A6V30_04315.p01
BMY_0185		RloB domain-containing protein	5	5	1	1	630	1	157		560	659	639	B9T10_01545.p01	BMY_0185.p01	a04b031c37c06570dd644ef46d09ac8c_951	2cf5bec40a3ef4476bf46f509f729c16_929												03da1bd30b32560bef8e38ea7761d9fe_1493
BMY_0277		RNA polymerase sigma factor RpoD	1	1	1	1	1706	1	166		770	770	770		BMY_0277.p01
B143_RS0100995		RNA-binding S4 domain-containing protein	1	1	1	1	2597	1	697		233	233	233																	c648bd7c3a222aa51bed3e3836bcf8c8_775
J7606_02205		RNA-dependent DNA polymerase	4	4	1	1	1970	1	1655		1496	1496	1496										614e29224da4f337b8899b3142d81070_1751	d977e7edc1a56720a787e465ab4ce472_1764	e653c257947c2dd0a414de7cb159ba14_1751			83683a6c7ca473684645e0830a47223d_917
J7554_07235		rubredoxin	3	3	1	1	1263	5	12		164	164	164									79ccbe49faa72747a800162f6a36c0ca_5754													B9T12_00455.p01	B9T18_04660.p01
J7561_00030		SAM-dependent DNA methyltransferase	3	3	1	1	1966	1	947		2255	2363	2327		BMY_0572.p01				4a9cac2c1a817d9acdec143b653b9a80_23		197b0243bc5bc4c380ecfb8919a026b1_5899
J7560_06725		SAM-dependent DNA methyltransferase	1	1	1	1	2608	6	13		1505	1505	1505				2cf5bec40a3ef4476bf46f509f729c16_5327
BMY_1654		SAM-dependent methyltransferase	17	17	1	1	3603	2	1		539	1064	1028	B9T10_06510.p01	BMY_1654.p01	a04b031c37c06570dd644ef46d09ac8c_2890		102e21fe2bbcace64a7555dd0bcc9007_3224	4a9cac2c1a817d9acdec143b653b9a80_3848	ac8fed72b32d7540cf9a1b9ac12df95a_3732	197b0243bc5bc4c380ecfb8919a026b1_2724					31e4ba73e5ddb8c85dea419204f0df5a_3774			03da1bd30b32560bef8e38ea7761d9fe_3443		B9T21_04250.p01	B9T15_06385.p01	B9T14_06355.p01	B9T11_03500.p01		B9T18_06180.p01	B9T13_05060.p01	F387_00764.p01	A6V30_09220.p01
J7561_07345		SAVED domain-containing protein	2	2	1	1	2616	6	30		1586	1586	1586					102e21fe2bbcace64a7555dd0bcc9007_5797	4a9cac2c1a817d9acdec143b653b9a80_5849
J7602_02310		sce7725 family protein	6	6	1	1	486	1	215		944	944	944	B9T10_03545.p01									614e29224da4f337b8899b3142d81070_1823	d977e7edc1a56720a787e465ab4ce472_1836	e653c257947c2dd0a414de7cb159ba14_1823			83683a6c7ca473684645e0830a47223d_845									B9T13_09840.p01
J7600_02300		sce7726 family protein	6	6	1	1	485	1	209		848	848	848	B9T10_03550.p01									614e29224da4f337b8899b3142d81070_1827	d977e7edc1a56720a787e465ab4ce472_1840	e653c257947c2dd0a414de7cb159ba14_1827			83683a6c7ca473684645e0830a47223d_841									B9T13_09845.p01
J7547_10040		sel1 repeat family protein	2	2	1	34	1	90	1	Investigate	1490	1490	1490					102e21fe2bbcace64a7555dd0bcc9007_7944	4a9cac2c1a817d9acdec143b653b9a80_7948
J7620_00265		sel1 repeat family protein	2	2	1	1	3310	1	936		1073	1073	1073							ac8fed72b32d7540cf9a1b9ac12df95a_4560							752b3971131f3206662b5e22da3b23aa_211
J7624_00020		sel1 repeat family protein	1	1	1	1	1761	1	1254		590	590	590																03da1bd30b32560bef8e38ea7761d9fe_15
J7554_08545		SEL1-like repeat protein	1	1	1	1	2285	1	1721		1106	1106	1106									79ccbe49faa72747a800162f6a36c0ca_6790
A6V30_03930		selenide, water dikinase	3	3	1	1	571	1	1211		959	959	959		BMY_0361.p01																							F387_00256.p01	A6V30_03930.p01
yedE		selenium metabolism membrane protein YedE/FdhT	21	21	1	1	245	83	2		881	1232	1215	B9T10_05435.p01	BMY_1440.p01	a04b031c37c06570dd644ef46d09ac8c_3720				ac8fed72b32d7540cf9a1b9ac12df95a_5733	197b0243bc5bc4c380ecfb8919a026b1_4453	79ccbe49faa72747a800162f6a36c0ca_4719	614e29224da4f337b8899b3142d81070_4925	d977e7edc1a56720a787e465ab4ce472_4777	e653c257947c2dd0a414de7cb159ba14_5024	31e4ba73e5ddb8c85dea419204f0df5a_5870	752b3971131f3206662b5e22da3b23aa_4800	83683a6c7ca473684645e0830a47223d_5087	03da1bd30b32560bef8e38ea7761d9fe_4999		B9T21_03205.p01	B9T15_05360.p01	B9T14_05345.p01	B9T11_04520.p01	B9T12_08160.p01	B9T18_07225.p01	B9T13_03935.p01		A6V30_08060.p01
group_667	yedE	selenium metabolism membrane protein YedE/FdhT	6	6	1	1	111	83	1		386	1232	1091		BMY_1441.p01		2cf5bec40a3ef4476bf46f509f729c16_4256	102e21fe2bbcace64a7555dd0bcc9007_4725	4a9cac2c1a817d9acdec143b653b9a80_4982											c648bd7c3a222aa51bed3e3836bcf8c8_3717								F387_01394.p01
J7624_09480		serine/threonine protein kinase	1	1	1	1	2420	1	1768		755	755	755																03da1bd30b32560bef8e38ea7761d9fe_7519
BMY_1408		serine/threonine transporter SstT	1	1	1	1	172	3	10		1178	1178	1178		BMY_1408.p01
A6V30_07225		serine/threonine transporter SstT	1	1	1	1	129	3	4		1214	1214	1214																										A6V30_07225.p01
J7560_00080		siderophore-interacting protein	24	24	1	1	1924	1	1141		632	797	790	B9T10_02815.p01	BMY_0433.p01	a04b031c37c06570dd644ef46d09ac8c_83	2cf5bec40a3ef4476bf46f509f729c16_61		4a9cac2c1a817d9acdec143b653b9a80_561	ac8fed72b32d7540cf9a1b9ac12df95a_1237	197b0243bc5bc4c380ecfb8919a026b1_1244	79ccbe49faa72747a800162f6a36c0ca_483	614e29224da4f337b8899b3142d81070_1239	d977e7edc1a56720a787e465ab4ce472_1252	e653c257947c2dd0a414de7cb159ba14_1239	31e4ba73e5ddb8c85dea419204f0df5a_1140	752b3971131f3206662b5e22da3b23aa_487	83683a6c7ca473684645e0830a47223d_1429	03da1bd30b32560bef8e38ea7761d9fe_625		B9T21_02620.p01	B9T15_01900.p01	B9T14_03130.p01	B9T11_00100.p01	B9T12_02630.p01	B9T18_02455.p01	B9T13_02690.p01	F387_00324.p01	A6V30_04255.p01
B143_RS0101960		siderophore-interacting protein	1	1	1	1	564	1	190		797	797	797																	c648bd7c3a222aa51bed3e3836bcf8c8_1535
group_236	ssb	single-stranded DNA-binding protein	12	12	1	1	1496	1	1645		488	488	488		BMY_0009.p01	a04b031c37c06570dd644ef46d09ac8c_5356				ac8fed72b32d7540cf9a1b9ac12df95a_4339			614e29224da4f337b8899b3142d81070_2051	d977e7edc1a56720a787e465ab4ce472_2064	e653c257947c2dd0a414de7cb159ba14_2051		752b3971131f3206662b5e22da3b23aa_7578	83683a6c7ca473684645e0830a47223d_617			B9T21_10045.p01			B9T11_05085.p01	B9T12_04595.p01		B9T13_10050.p01
group_1330	ssb	single-stranded DNA-binding protein	7	7	1	1	1490	1	933		500	500	500			a04b031c37c06570dd644ef46d09ac8c_4023				ac8fed72b32d7540cf9a1b9ac12df95a_1331							752b3971131f3206662b5e22da3b23aa_2604		03da1bd30b32560bef8e38ea7761d9fe_6044					B9T11_07985.p01		B9T18_01325.p01	B9T13_03005.p01
group_238	ssb	single-stranded DNA-binding protein	5	5	1	1	1498	1	1588		488	488	488		BMY_2108.p01		2cf5bec40a3ef4476bf46f509f729c16_3847												03da1bd30b32560bef8e38ea7761d9fe_3891			B9T15_03950.p01	B9T14_01090.p01
J7554_08825		single-stranded DNA-binding protein	2	2	1	1	1483	1	135		188	488	338	B9T10_03790.p01								79ccbe49faa72747a800162f6a36c0ca_7009
BMY_0052		single-stranded DNA-binding protein	1	1	1	1	1467	1	1620		488	488	488		BMY_0052.p01
group_2490	ssb	single-stranded DNA-binding protein	1	1	1	1	1423	1	1862		488	488	488													31e4ba73e5ddb8c85dea419204f0df5a_429
BMY_1888		single-stranded-DNA-specific exonuclease RecJ	1	1	1	1	697	204	1		212	212	212		BMY_1888.p01
J7552_01685		SIR2 family protein	1	1	1	1	3374	1	925		2462	2462	2462								197b0243bc5bc4c380ecfb8919a026b1_1340
J7607_04085		SIR2 family protein	1	1	1	1	736	1	248		1418	1418	1418													31e4ba73e5ddb8c85dea419204f0df5a_3236
J7547_09740		SIS domain-containing protein	2	2	1	1	393	1	230		566	566	566					102e21fe2bbcace64a7555dd0bcc9007_7721	4a9cac2c1a817d9acdec143b653b9a80_7717
J7607_04050		site-specific DNA-methyltransferase	1	1	1	1	728	1	226		944	944	944													31e4ba73e5ddb8c85dea419204f0df5a_3208
B9T18_01775		site-specific integrase	9	9	1	1	2511	1	968		995	995	995			a04b031c37c06570dd644ef46d09ac8c_5379							614e29224da4f337b8899b3142d81070_2071	d977e7edc1a56720a787e465ab4ce472_2084	e653c257947c2dd0a414de7cb159ba14_2071			83683a6c7ca473684645e0830a47223d_597	03da1bd30b32560bef8e38ea7761d9fe_75					B9T11_08565.p01		B9T18_01775.p01			A6V30_04965.p01
B9T18_07755		site-specific integrase	6	6	1	1	801	1	320		995	995	995	B9T10_07920.p01				102e21fe2bbcace64a7555dd0bcc9007_2029	4a9cac2c1a817d9acdec143b653b9a80_6199							31e4ba73e5ddb8c85dea419204f0df5a_3204			03da1bd30b32560bef8e38ea7761d9fe_2029							B9T18_07755.p01
J7622_05040		site-specific integrase	5	5	1	1	509	1	313		995	995	995										614e29224da4f337b8899b3142d81070_3189	d977e7edc1a56720a787e465ab4ce472_4312	e653c257947c2dd0a414de7cb159ba14_4295			83683a6c7ca473684645e0830a47223d_4003						B9T11_07725.p01
J7560_06645		site-specific integrase	4	4	1	1	2637	6	2		1193	1334	1298				2cf5bec40a3ef4476bf46f509f729c16_5265	102e21fe2bbcace64a7555dd0bcc9007_5741	4a9cac2c1a817d9acdec143b653b9a80_5793																			F387_01764.p01
J7552_09450		site-specific integrase	2	2	1	1	2451	1	1678		995	1061	1028								197b0243bc5bc4c380ecfb8919a026b1_7499																B9T13_07760.p01
J7547_08000		site-specific integrase	2	2	1	1	1151	33	1		1448	1448	1448					102e21fe2bbcace64a7555dd0bcc9007_6359	4a9cac2c1a817d9acdec143b653b9a80_3519
J7560_01895		site-specific integrase	1	1	1	1	838	1	262		416	416	416				2cf5bec40a3ef4476bf46f509f729c16_1507
J7561_08605		SLATT domain-containing protein	4	4	1	1	3089	145	1		572	572	572					102e21fe2bbcace64a7555dd0bcc9007_6810	4a9cac2c1a817d9acdec143b653b9a80_6839													B9T15_09765.p01	B9T14_09735.p01
J7554_09725		SMI1/KNR4 family protein	3	3	1	1	2305	1	1660		407	407	407								197b0243bc5bc4c380ecfb8919a026b1_5915	79ccbe49faa72747a800162f6a36c0ca_7704																	A6V30_04920.p01
B9T13_10270		sodium/glutamate symporter	1	1	1	1	2970	1	424		1205	1205	1205																								B9T13_10270.p01
B9T12_03275		sodium:alanine symporter	1	1	1	1	1978	1	950		1463	1463	1463																						B9T12_03275.p01
J7553_09785		STAS-like domain-containing protein	1	1	1	1	2417	1	1756		326	326	326							ac8fed72b32d7540cf9a1b9ac12df95a_7749
J7624_09760		STAS-like domain-containing protein	1	1	1	1	546	1	98		320	320	320																03da1bd30b32560bef8e38ea7761d9fe_7740
J7607_06730		stealth conserved region 3 domain-containing protein	1	1	1	1	2665	4	29		1091	1091	1091													31e4ba73e5ddb8c85dea419204f0df5a_5348
cas1f		subtype I-F CRISPR-associated endonuclease Cas1	22	22	1	1	1389	1	137		953	953	953	B9T10_01035.p01	BMY_2097.p01	a04b031c37c06570dd644ef46d09ac8c_4660	2cf5bec40a3ef4476bf46f509f729c16_3815	102e21fe2bbcace64a7555dd0bcc9007_3838	4a9cac2c1a817d9acdec143b653b9a80_1832	ac8fed72b32d7540cf9a1b9ac12df95a_4863	197b0243bc5bc4c380ecfb8919a026b1_3343	79ccbe49faa72747a800162f6a36c0ca_5273				31e4ba73e5ddb8c85dea419204f0df5a_4418	752b3971131f3206662b5e22da3b23aa_5926		03da1bd30b32560bef8e38ea7761d9fe_3924	c648bd7c3a222aa51bed3e3836bcf8c8_2988	B9T21_01035.p01	B9T15_03990.p01	B9T14_01050.p01	B9T11_01690.p01	B9T12_01050.p01	B9T18_04055.p01	B9T13_01055.p01	F387_01044.p01	A6V30_02665.p01
[truncated: 198 more rows]
