# Supplementary material for: Comparative Genomic Analysis of the Human Pathogen Wohlfahrtiimonas Chitiniclastica Provides Insight Into the Identification of Antimicrobial Resistance Genotypes and Potential Virulence Traits
Source: Front Cell Infect Microbiol. 2022 Jul 7;12:912427. doi: 10.3389/fcimb.2022.912427 (PMC9301364; doi:10.3389/fcimb.2022.912427)
Supplement: Supplementary file 6 [file Table_6.xlsx]

## Sheet: DSM 100374
locus_tag	ftype	length_bp	gene	EC_number	COG	product
EAPIDJML_00001	CDS	5769				hypothetical protein
EAPIDJML_00002	CDS	189				hypothetical protein
EAPIDJML_00003	CDS	585				hypothetical protein
EAPIDJML_00004	CDS	2034	fyuA		COG1629	Pesticin receptor
EAPIDJML_00005	CDS	1734			COG1132	putative ABC transporter ATP-binding protein
EAPIDJML_00006	CDS	1752	hepA		COG1132	Heterocyst differentiation ATP-binding protein HepA
EAPIDJML_00007	CDS	1233				hypothetical protein
EAPIDJML_00008	CDS	711	menH_1	4.2.99.20		2-succinyl-6-hydroxy-2,4-cyclohexadiene-1-carboxylate synthase
EAPIDJML_00009	CDS	138				hypothetical protein
EAPIDJML_00010	CDS	894				hypothetical protein
EAPIDJML_00011	CDS	933				hypothetical protein
EAPIDJML_00012	CDS	1017	nadA	2.5.1.72	COG0379	Quinolinate synthase A
EAPIDJML_00013	CDS	858	nadC_1	2.4.2.19	COG0157	putative nicotinate-nucleotide pyrophosphorylase [carboxylating]
EAPIDJML_00014	CDS	825	sdhL	1.1.1.25	COG0169	Shikimate dehydrogenase-like protein
EAPIDJML_00015	CDS	1419	fdhC_1			Fructose dehydrogenase cytochrome subunit
EAPIDJML_00016	CDS	1653	fdhL	1.1.99.11		Fructose dehydrogenase large subunit
EAPIDJML_00017	CDS	519	fdhS			Fructose dehydrogenase small subunit
EAPIDJML_00018	CDS	903	yijE			putative cystine transporter YijE
EAPIDJML_00019	CDS	855	cvfB		COG2996	Conserved virulence factor B
EAPIDJML_00020	CDS	1116	ydhC			Inner membrane transport protein YdhC
EAPIDJML_00021	CDS	798	viuB		COG2375	Vibriobactin utilization protein ViuB
EAPIDJML_00022	CDS	759	nimR_1			HTH-type transcriptional regulator NimR
EAPIDJML_00023	CDS	2688	acnA	4.2.1.3	COG1048	Aconitate hydratase A
EAPIDJML_00024	CDS	522	ahpD	1.11.1.15	COG2128	Alkyl hydroperoxide reductase AhpD
EAPIDJML_00025	CDS	2061	yccS_1		COG1289	Inner membrane protein YccS
EAPIDJML_00026	CDS	1794	dsbD	1.8.1.8	COG4232	Thiol:disulfide interchange protein DsbD
EAPIDJML_00027	tRNA	76				tRNA-Gly(gcc)
EAPIDJML_00028	CDS	951	cmoB	2.5.1.-	COG0500	tRNA U34 carboxymethyltransferase
EAPIDJML_00029	CDS	738	cmoA	2.1.3.-	COG0500	Carboxy-S-adenosyl-L-methionine synthase
EAPIDJML_00030	CDS	642	tatB			Sec-independent protein translocase protein TatB
EAPIDJML_00031	CDS	249	tatA			Sec-independent protein translocase protein TatA
EAPIDJML_00032	tRNA	76				tRNA-Gly(gcc)
EAPIDJML_00033	tRNA	74				tRNA-Cys(gca)
EAPIDJML_00034	CDS	1896	dnaX	2.7.7.7	COG2812	DNA polymerase III subunit tau
EAPIDJML_00035	CDS	333	ybaB		COG0718	Nucleoid-associated protein YbaB
EAPIDJML_00036	CDS	606	recR		COG0353	Recombination protein RecR
EAPIDJML_00037	CDS	342		3.9.1.-	COG0537	Purine nucleoside phosphoramidase
EAPIDJML_00038	CDS	513	apt	2.4.2.7		Adenine phosphoribosyltransferase
EAPIDJML_00039	CDS	2457	lptD		COG1452	LPS-assembly protein LptD
EAPIDJML_00040	CDS	1344	hslU		COG1220	ATP-dependent protease ATPase subunit HslU
EAPIDJML_00041	CDS	540	hslV	3.4.25.2	COG5405	ATP-dependent protease subunit HslV
EAPIDJML_00042	CDS	717				hypothetical protein
EAPIDJML_00043	CDS	798			COG0725	Putative binding protein
EAPIDJML_00044	CDS	777	cysW		COG4208	Sulfate transport system permease protein CysW
EAPIDJML_00045	CDS	699	cysA_1	7.3.2.3	COG1118	Sulfate/thiosulfate import ATP-binding protein CysA
EAPIDJML_00046	CDS	840	nadC_2	2.4.2.19	COG0157	putative nicotinate-nucleotide pyrophosphorylase [carboxylating]
EAPIDJML_00047	CDS	1629				hypothetical protein
EAPIDJML_00048	CDS	2922				hypothetical protein
EAPIDJML_00049	CDS	576	glmU_1	2.7.7.23		Bifunctional protein GlmU
EAPIDJML_00050	CDS	1392	gabD1	1.2.1.79	COG1012	Succinate-semialdehyde dehydrogenase [NADP(+)] 1
EAPIDJML_00051	CDS	882	yddG		COG0697	Aromatic amino acid exporter YddG
EAPIDJML_00052	CDS	1017	cydB	7.1.1.7	COG1294	Cytochrome bd-I ubiquinol oxidase subunit 2
EAPIDJML_00053	CDS	1323	ythA	1.10.3.-	COG1271	Putative cytochrome bd menaquinol oxidase subunit I
EAPIDJML_00054	CDS	258				hypothetical protein
EAPIDJML_00055	CDS	651	yiaD		COG2885	putative lipoprotein YiaD
EAPIDJML_00056	CDS	1473				hypothetical protein
EAPIDJML_00057	CDS	1326				hypothetical protein
EAPIDJML_00058	CDS	1293	davT_1	2.6.1.48	COG0160	5-aminovalerate aminotransferase DavT
EAPIDJML_00059	CDS	1389	gabD_1	1.2.1.79	COG1012	Succinate-semialdehyde dehydrogenase [NADP(+)]
EAPIDJML_00060	CDS	1098				hypothetical protein
EAPIDJML_00061	CDS	519	def	3.5.1.88	COG0242	Peptide deformylase
EAPIDJML_00062	CDS	942	fmt	2.1.2.9	COG0223	Methionyl-tRNA formyltransferase
EAPIDJML_00063	CDS	1530	rsmB	2.1.1.176	COG0144	Ribosomal RNA small subunit methyltransferase B
EAPIDJML_00064	CDS	561				hypothetical protein
EAPIDJML_00065	CDS	2145	sasA_1	2.7.-.-		Adaptive-response sensory-kinase SasA
EAPIDJML_00066	CDS	1386	argH	4.3.2.1	COG0165	Argininosuccinate lyase
EAPIDJML_00067	CDS	2157				hypothetical protein
EAPIDJML_00068	CDS	594				hypothetical protein
EAPIDJML_00069	CDS	789	menH_2	4.2.99.20		2-succinyl-6-hydroxy-2,4-cyclohexadiene-1-carboxylate synthase
EAPIDJML_00070	CDS	1164	bioF	2.3.1.47	COG0156	8-amino-7-oxononanoate synthase
EAPIDJML_00071	CDS	768	bioC	2.1.1.197		Malonyl-[acyl-carrier protein] O-methyltransferase
EAPIDJML_00072	CDS	495	purE	5.4.99.18	COG0041	N5-carboxyaminoimidazole ribonucleotide mutase
EAPIDJML_00073	CDS	1125	purK	6.3.4.18		N5-carboxyaminoimidazole ribonucleotide synthase
EAPIDJML_00074	CDS	714	purC	6.3.2.6	COG0152	Phosphoribosylaminoimidazole-succinocarboxamide synthase
EAPIDJML_00075	CDS	1401	purF	2.4.2.14	COG0034	Amidophosphoribosyltransferase
EAPIDJML_00076	CDS	1011	purM	6.3.3.1	COG0150	Phosphoribosylformylglycinamidine cyclo-ligase
EAPIDJML_00077	CDS	585	purN	2.1.2.2		Phosphoribosylglycinamide formyltransferase
EAPIDJML_00078	CDS	1542	purH			Bifunctional purine biosynthesis protein PurH
EAPIDJML_00079	CDS	1581		1.4.3.2	COG1231	L-amino acid oxidase
EAPIDJML_00080	CDS	414	fdhC_2			Fructose dehydrogenase cytochrome subunit
EAPIDJML_00081	CDS	900	mrr		COG1715	Mrr restriction system protein
EAPIDJML_00082	CDS	1260	purD	6.3.4.13	COG0151	Phosphoribosylamine--glycine ligase
EAPIDJML_00083	CDS	1401				hypothetical protein
EAPIDJML_00084	CDS	960	selD	2.7.9.3	COG0709	Selenide, water dikinase
EAPIDJML_00085	CDS	873	nadK	2.7.1.23		NAD kinase
EAPIDJML_00086	CDS	438				hypothetical protein
EAPIDJML_00087	CDS	606	mepS	3.4.-.-	COG0791	Murein DD-endopeptidase MepS/Murein LD-carboxypeptidase
EAPIDJML_00088	CDS	918	metAA	2.3.1.31		Homoserine O-acetyltransferase
EAPIDJML_00089	CDS	564	ves			Protein Ves
EAPIDJML_00090	CDS	1371	proY		COG1113	Proline-specific permease ProY
EAPIDJML_00091	CDS	1005				hypothetical protein
EAPIDJML_00092	CDS	309	ftsB			Cell division protein FtsB
EAPIDJML_00093	CDS	1089	prfA		COG0216	Peptide chain release factor RF1
EAPIDJML_00094	CDS	1827	cpdB	3.1.3.6	COG0737	2',3'-cyclic-nucleotide 2'-phosphodiesterase/3'-nucleotidase
EAPIDJML_00095	CDS	924	rpoS		COG0568	RNA polymerase sigma factor RpoS
EAPIDJML_00096	CDS	420	nhaX		COG0589	Stress response protein NhaX
EAPIDJML_00097	CDS	996	gapA	1.2.1.12	COG0057	Glyceraldehyde-3-phosphate dehydrogenase A
EAPIDJML_00098	CDS	1491	pepA_1	3.4.11.1	COG0260	Cytosol aminopeptidase
EAPIDJML_00099	CDS	1290	miaB	2.8.4.3	COG0621	tRNA-2-methylthio-N(6)-dimethylallyladenosine synthase
EAPIDJML_00100	CDS	861	ywqG		COG3878	putative protein YwqG
EAPIDJML_00101	CDS	768	yfiH	1.10.3.-	COG1496	Polyphenol oxidase
EAPIDJML_00102	CDS	972	rluD	5.4.99.23	COG0564	Ribosomal large subunit pseudouridine synthase D
EAPIDJML_00103	CDS	765	bamD		COG4105	Outer membrane protein assembly factor BamD
EAPIDJML_00104	CDS	1263	waaA	2.4.99.12	COG1519	3-deoxy-D-manno-octulosonic acid transferase
EAPIDJML_00105	CDS	693				hypothetical protein
EAPIDJML_00106	CDS	426	msrB	1.8.4.12		Peptide methionine sulfoxide reductase MsrB
EAPIDJML_00107	CDS	1296	tcyP_1		COG1823	L-cystine uptake protein TcyP
EAPIDJML_00108	CDS	705				hypothetical protein
EAPIDJML_00109	CDS	357				hypothetical protein
EAPIDJML_00110	tRNA	77				tRNA-Arg(ccg)
EAPIDJML_00111	CDS	396	nudG	3.6.1.65	COG0494	CTP pyrophosphohydrolase
EAPIDJML_00112	CDS	2943	uvrB_1			UvrABC system protein B
EAPIDJML_00113	CDS	867				hypothetical protein
EAPIDJML_00114	CDS	549	folE	3.5.4.16	COG0302	GTP cyclohydrolase 1
EAPIDJML_00115	CDS	282				hypothetical protein
EAPIDJML_00116	CDS	1086	mutY	3.2.2.31	COG1194	Adenine DNA glycosylase
EAPIDJML_00117	CDS	756	cmoM	2.1.1.-	COG0500	tRNA 5-carboxymethoxyuridine methyltransferase
EAPIDJML_00118	CDS	450				hypothetical protein
EAPIDJML_00119	CDS	912	ravA	3.6.3.-		ATPase RavA
EAPIDJML_00120	CDS	888				hypothetical protein
EAPIDJML_00121	CDS	2007	tgpA	2.3.2.13	COG1305	Protein-glutamine gamma-glutamyltransferase
EAPIDJML_00122	CDS	225	slyX			Protein SlyX
EAPIDJML_00123	CDS	588	fdoG	1.17.1.9	COG0243	Formate dehydrogenase-O major subunit
EAPIDJML_00124	CDS	2430	fdnG	1.17.5.3	COG0243	Formate dehydrogenase, nitrate-inducible, major subunit
EAPIDJML_00125	CDS	939	fdnH		COG0437	Formate dehydrogenase, nitrate-inducible, iron-sulfur subunit
EAPIDJML_00126	CDS	666	fdoI		COG2864	Formate dehydrogenase, cytochrome b556(fdo) subunit
EAPIDJML_00127	CDS	876	fdhE			Protein FdhE
EAPIDJML_00128	CDS	528	yagU_1		COG3477	Inner membrane protein YagU
EAPIDJML_00129	CDS	1383		1.18.1.2		Ferredoxin--NADP reductase
EAPIDJML_00130	CDS	2136	btuB_1			Vitamin B12 transporter BtuB
EAPIDJML_00131	CDS	816	COQ5	2.1.1.163		2-methoxy-6-polyprenyl-1,4-benzoquinol methylase, mitochondrial
EAPIDJML_00132	CDS	756			COG1120	putative ABC transporter ATP-binding protein
EAPIDJML_00133	CDS	987			COG0609	putative ABC transporter permease protein
EAPIDJML_00134	CDS	1053	btuF_1			Vitamin B12-binding protein
EAPIDJML_00135	CDS	675	yhhQ		COG1738	Queuosine precursor transporter
EAPIDJML_00136	CDS	231				hypothetical protein
EAPIDJML_00137	CDS	1164	ygiC	6.3.1.-	COG0754	Putative acid--amine ligase YgiC
EAPIDJML_00138	CDS	714				hypothetical protein
EAPIDJML_00139	CDS	324				hypothetical protein
EAPIDJML_00140	CDS	666				hypothetical protein
EAPIDJML_00141	CDS	1017	lplA	6.3.1.20	COG0095	Lipoate-protein ligase A
EAPIDJML_00142	CDS	807				hypothetical protein
EAPIDJML_00143	CDS	1962				hypothetical protein
EAPIDJML_00144	CDS	1533	gpmI	5.4.2.12	COG0696	2,3-bisphosphoglycerate-independent phosphoglycerate mutase
EAPIDJML_00145	CDS	1374	ctpA	3.4.21.102	COG0793	Carboxy-terminal processing protease CtpA
EAPIDJML_00146	CDS	2817	uvrA		COG0178	UvrABC system protein A
EAPIDJML_00147	CDS	444				hypothetical protein
EAPIDJML_00148	CDS	1020	ilvE	2.6.1.42	COG0115	Branched-chain-amino-acid aminotransferase
EAPIDJML_00149	CDS	3483	pycA	6.4.1.1		Pyruvate carboxylase
EAPIDJML_00150	CDS	564	betI			HTH-type transcriptional regulator BetI
EAPIDJML_00151	CDS	525				hypothetical protein
EAPIDJML_00152	CDS	903	murQ	4.2.1.126	COG2103	N-acetylmuramic acid 6-phosphate etherase
EAPIDJML_00153	CDS	1155	anmK	2.7.1.170	COG2377	Anhydro-N-acetylmuramic acid kinase
EAPIDJML_00154	CDS	1884	rpoD		COG0568	RNA polymerase sigma factor RpoD
EAPIDJML_00155	CDS	978	dusA	1.3.1.-	COG0042	tRNA-dihydrouridine(20/20a) synthase
EAPIDJML_00156	CDS	1542				hypothetical protein
EAPIDJML_00157	CDS	447	yqeY		COG1610	putative protein YqeY
EAPIDJML_00158	CDS	1737	dnaG_1	2.7.7.-	COG0358	DNA primase
EAPIDJML_00159	CDS	675				hypothetical protein
EAPIDJML_00160	CDS	1851	ilvD	4.2.1.9	COG0129	Dihydroxy-acid dehydratase
EAPIDJML_00161	CDS	348	yjcH		COG3162	Inner membrane protein YjcH
EAPIDJML_00162	CDS	1710	actP_1		COG4147	Cation/acetate symporter ActP
EAPIDJML_00163	CDS	843	rlmJ	2.1.1.266	COG2961	Ribosomal RNA large subunit methyltransferase J
EAPIDJML_00164	CDS	885	ribN			Riboflavin transporter
EAPIDJML_00165	CDS	903	era		COG1159	GTPase Era
EAPIDJML_00166	CDS	675	rnc	3.1.26.3	COG0571	Ribonuclease 3
EAPIDJML_00167	CDS	807	lepB	3.4.21.89	COG0681	Signal peptidase I
EAPIDJML_00168	CDS	1791	lepA	3.6.5.-	COG0481	Elongation factor 4
EAPIDJML_00169	CDS	1275				hypothetical protein
EAPIDJML_00170	CDS	1425				hypothetical protein
EAPIDJML_00171	CDS	351				hypothetical protein
EAPIDJML_00172	CDS	840	rsmI	2.1.1.198	COG0313	Ribosomal RNA small subunit methyltransferase I
EAPIDJML_00173	CDS	1230	yajR		COG0477	Inner membrane transport protein YajR
EAPIDJML_00174	CDS	741	deoC	4.1.2.4	COG0274	Deoxyribose-phosphate aldolase
EAPIDJML_00175	CDS	780	suhB	3.1.3.25	COG0483	Inositol-1-monophosphatase
EAPIDJML_00176	CDS	786				hypothetical protein
EAPIDJML_00177	CDS	1329	cpxA	2.7.13.3		Sensor histidine kinase CpxA
EAPIDJML_00178	CDS	687	cpxR_1		COG0745	Transcriptional regulatory protein CpxR
EAPIDJML_00179	CDS	411				hypothetical protein
EAPIDJML_00180	CDS	282				hypothetical protein
EAPIDJML_00181	CDS	606	mlaC		COG2854	Intermembrane phospholipid transport system binding protein MlaC
EAPIDJML_00182	CDS	999	murB	1.3.1.98	COG0812	UDP-N-acetylenolpyruvoylglucosamine reductase
EAPIDJML_00183	CDS	1215				hypothetical protein
EAPIDJML_00184	CDS	1902	ppiD	5.2.1.8	COG0760	Peptidyl-prolyl cis-trans isomerase D
EAPIDJML_00185	CDS	2571				hypothetical protein
EAPIDJML_00186	CDS	1596	arnT	2.4.2.43		Undecaprenyl phosphate-alpha-4-amino-4-deoxy-L-arabinose arabinosyl transferase
EAPIDJML_00187	CDS	411	fur		COG0735	Ferric uptake regulation protein
EAPIDJML_00188	CDS	1050	fbp	3.1.3.11	COG0158	Fructose-1,6-bisphosphatase class 1
EAPIDJML_00189	CDS	567	efp		COG0231	Elongation factor P
EAPIDJML_00190	CDS	591	petA	7.1.1.8	COG0723	Ubiquinol-cytochrome c reductase iron-sulfur subunit
EAPIDJML_00191	CDS	1275	petB		COG1290	Cytochrome b
EAPIDJML_00192	CDS	828	petC		COG2857	Ammonia monooxygenase gamma subunit
EAPIDJML_00193	CDS	600	sspA		COG0625	Stringent starvation protein A
EAPIDJML_00194	CDS	468				hypothetical protein
EAPIDJML_00195	CDS	537	ppa	3.6.1.1	COG0221	Inorganic pyrophosphatase
EAPIDJML_00196	CDS	624				hypothetical protein
EAPIDJML_00197	CDS	744	modA		COG0725	Molybdate-binding protein ModA
EAPIDJML_00198	CDS	669	modB		COG4149	Molybdenum transport system permease protein ModB
EAPIDJML_00199	CDS	672	cysA_2	7.3.2.3	COG1118	Sulfate/thiosulfate import ATP-binding protein CysA
EAPIDJML_00200	CDS	387	crcB			Putative fluoride ion transporter CrcB
EAPIDJML_00201	CDS	765	trmJ	2.1.1.-		tRNA (cytidine/uridine/adenosine-2'-O-)-methyltransferase TrmJ
EAPIDJML_00202	CDS	771	cysE	2.3.1.30	COG1045	Serine acetyltransferase
EAPIDJML_00203	CDS	1215	argG	6.3.4.5	COG0137	Argininosuccinate synthase
EAPIDJML_00204	CDS	1389	trkA		COG0569	Trk system potassium uptake protein TrkA
EAPIDJML_00205	CDS	651				hypothetical protein
EAPIDJML_00206	CDS	426	nsrR		COG1959	HTH-type transcriptional repressor NsrR
EAPIDJML_00207	CDS	1233	nadR_1		COG1056	Trifunctional NAD biosynthesis/regulator protein NadR
EAPIDJML_00208	CDS	687	pnuC_1		COG3201	Nicotinamide riboside transporter PnuC
EAPIDJML_00209	CDS	447	rplI		COG0359	50S ribosomal protein L9
EAPIDJML_00210	CDS	225	rpsR		COG0238	30S ribosomal protein S18
EAPIDJML_00211	CDS	363	rpsF		COG0360	30S ribosomal protein S6
EAPIDJML_00212	CDS	795	psd	4.1.1.65	COG0688	Phosphatidylserine decarboxylase proenzyme
EAPIDJML_00213	CDS	771	kdsB	2.7.7.38		3-deoxy-manno-octulosonate cytidylyltransferase
EAPIDJML_00214	CDS	642	eda		COG0800	Putative KHG/KDPG aldolase
EAPIDJML_00215	CDS	798	mepA_1	3.4.24.-	COG3770	Penicillin-insensitive murein endopeptidase
EAPIDJML_00216	CDS	897	ddh	1.4.1.16		Meso-diaminopimelate D-dehydrogenase
EAPIDJML_00217	CDS	963	hemH	4.99.1.1	COG0276	Ferrochelatase
EAPIDJML_00218	CDS	1797	aspS	6.1.1.23	COG0173	Aspartate--tRNA(Asp/Asn) ligase
EAPIDJML_00219	CDS	261				hypothetical protein
EAPIDJML_00220	CDS	303	ihfB		COG0776	Integration host factor subunit beta
EAPIDJML_00221	CDS	1665	rpsA		COG0539	30S ribosomal protein S1
EAPIDJML_00222	CDS	678	cmk	2.7.4.25	COG0283	Cytidylate kinase
EAPIDJML_00223	CDS	168				hypothetical protein
EAPIDJML_00224	CDS	942	hemC	2.5.1.61	COG0181	Porphobilinogen deaminase
EAPIDJML_00225	CDS	2307				hypothetical protein
EAPIDJML_00226	CDS	1326	hemY		COG3071	Protein HemY
EAPIDJML_00227	CDS	828	folP	2.5.1.15		Dihydropteroate synthase
EAPIDJML_00228	CDS	1905	yheS		COG0488	putative ABC transporter ATP-binding protein YheS
EAPIDJML_00229	CDS	402				hypothetical protein
EAPIDJML_00230	CDS	1101				TelA-like protein
EAPIDJML_00231	CDS	1116				hypothetical protein
EAPIDJML_00232	CDS	1464				hypothetical protein
EAPIDJML_00233	CDS	1887				hypothetical protein
EAPIDJML_00234	CDS	1017				hypothetical protein
EAPIDJML_00235	CDS	1146				hypothetical protein
EAPIDJML_00236	CDS	2124	yccS_2		COG1289	Inner membrane protein YccS
EAPIDJML_00237	CDS	1230	sotB		COG2814	Sugar efflux transporter
EAPIDJML_00238	CDS	1050	gutB	1.1.1.-	COG1063	Sorbitol dehydrogenase
EAPIDJML_00239	CDS	660				hypothetical protein
EAPIDJML_00240	CDS	1242				hypothetical protein
EAPIDJML_00241	CDS	1395	fumC	4.2.1.2	COG0114	Fumarate hydratase class II
EAPIDJML_00242	CDS	3399	pyrK			Dihydroorotate dehydrogenase B (NAD(+)), electron transfer subunit
EAPIDJML_00243	CDS	1386	sdcS			Sodium-dependent dicarboxylate transporter SdcS
EAPIDJML_00244	CDS	1005	hemB	4.2.1.24	COG0113	Delta-aminolevulinic acid dehydratase
EAPIDJML_00245	CDS	1068	aroC	4.2.3.5		Chorismate synthase
EAPIDJML_00246	CDS	1320	gltT			Proton/sodium-glutamate symport protein
EAPIDJML_00247	CDS	1233		2.7.2.4	COG0527	Aspartate kinase
EAPIDJML_00248	CDS	720	yueD	1.1.1.320		Benzil reductase ((S)-benzoin forming)
EAPIDJML_00249	CDS	435	rppH_1	3.6.1.-		RNA pyrophosphohydrolase
EAPIDJML_00250	CDS	336	erpA		COG0316	Iron-sulfur cluster insertion protein ErpA
EAPIDJML_00251	CDS	921	qmcA		COG0330	Protein QmcA
EAPIDJML_00252	CDS	447	ybbJ		COG1585	Inner membrane protein YbbJ
EAPIDJML_00253	CDS	1065				hypothetical protein
EAPIDJML_00254	CDS	1368	der_1			GTPase Der
EAPIDJML_00255	CDS	1449	pepD	3.4.13.18	COG2195	Cytosol non-specific dipeptidase
EAPIDJML_00256	CDS	1713				hypothetical protein
EAPIDJML_00257	CDS	1056	lptG		COG0795	Lipopolysaccharide export system permease protein LptG
EAPIDJML_00258	CDS	1068	lptF		COG0795	Lipopolysaccharide export system permease protein LptF
EAPIDJML_00259	CDS	1113	tgt	2.4.2.29	COG0343	Queuine tRNA-ribosyltransferase
EAPIDJML_00260	CDS	432	holC	2.7.7.7	COG2927	DNA polymerase III subunit chi
EAPIDJML_00261	CDS	3423	smc_1			Chromosome partition protein Smc
EAPIDJML_00262	CDS	339				hypothetical protein
EAPIDJML_00263	CDS	1302				hypothetical protein
EAPIDJML_00264	CDS	1506	cstA		COG1966	Peptide transporter CstA
EAPIDJML_00265	CDS	1872				hypothetical protein
EAPIDJML_00266	CDS	888	metR			HTH-type transcriptional regulator MetR
EAPIDJML_00267	CDS	2136	prc	3.4.21.102	COG0793	Tail-specific protease
EAPIDJML_00268	CDS	1083	serC	2.6.1.52	COG1932	Phosphoserine aminotransferase
EAPIDJML_00269	CDS	609	clpP_1	3.4.21.92	COG0740	ATP-dependent Clp protease proteolytic subunit
EAPIDJML_00270	CDS	1299	clpX		COG1219	ATP-dependent Clp protease ATP-binding subunit ClpX
EAPIDJML_00271	CDS	645	rnt	3.1.13.-	COG0847	Ribonuclease T
EAPIDJML_00272	CDS	1563	gshA	6.3.2.2	COG2918	Glutamate--cysteine ligase
EAPIDJML_00273	CDS	981	alx		COG0861	Putative membrane-bound redox modulator Alx
EAPIDJML_00274	CDS	1317	adeQ		COG2252	Adenine permease AdeQ
EAPIDJML_00275	CDS	1011	mdtA			Multidrug resistance protein MdtA
EAPIDJML_00276	CDS	3057	bepE			Efflux pump membrane transporter BepE
EAPIDJML_00277	CDS	555	olsG	2.1.1.344		Ornithine lipid N-methyltransferase
EAPIDJML_00278	CDS	468	slyB		COG3133	Outer membrane lipoprotein SlyB
EAPIDJML_00279	CDS	1290	gltP		COG1301	Proton/glutamate-aspartate symporter
EAPIDJML_00280	CDS	1383	ppnN	3.2.2.-	COG1611	Pyrimidine/purine nucleotide 5'-monophosphate nucleosidase
EAPIDJML_00281	CDS	774	yaaA		COG3022	Peroxide stress resistance protein YaaA
EAPIDJML_00282	CDS	780				hypothetical protein
EAPIDJML_00283	CDS	1263	pyrP			Uracil permease
EAPIDJML_00284	CDS	561	tpd		COG3470	34 kDa membrane antigen
EAPIDJML_00285	CDS	342				hypothetical protein
EAPIDJML_00286	CDS	843	efeU		COG0672	Ferrous iron permease EfeU
EAPIDJML_00287	CDS	897	efeO		COG2822	Iron uptake system component EfeO
EAPIDJML_00288	CDS	1260	efeB	1.11.1.-	COG2837	Deferrochelatase/peroxidase EfeB
EAPIDJML_00289	CDS	432		3.1.2.-	COG2050	Putative esterase
EAPIDJML_00290	CDS	363				hypothetical protein
EAPIDJML_00291	CDS	1098	mnmA	2.8.1.13	COG0482	tRNA-specific 2-thiouridylase MnmA
EAPIDJML_00292	CDS	444				hypothetical protein
EAPIDJML_00293	CDS	747	truA	5.4.99.12	COG0101	tRNA pseudouridine synthase A
EAPIDJML_00294	CDS	858	hexR		COG1737	HTH-type transcriptional regulator HexR
EAPIDJML_00295	CDS	978	glk	2.7.1.2	COG0837	Glucokinase
EAPIDJML_00296	CDS	612	engB		COG0218	putative GTP-binding protein EngB
EAPIDJML_00297	CDS	420				hypothetical protein
EAPIDJML_00298	CDS	2097			COG1292	Glycine betaine transporter
EAPIDJML_00299	CDS	849	purU	3.5.1.10	COG0788	Formyltetrahydrofolate deformylase
EAPIDJML_00300	CDS	426	exbD_1		COG0848	Biopolymer transport protein ExbD
EAPIDJML_00301	CDS	684	tolQ_1		COG0811	Tol-Pal system protein TolQ
EAPIDJML_00302	CDS	690				hypothetical protein
EAPIDJML_00303	CDS	801	dapB	1.17.1.8	COG0289	4-hydroxy-tetrahydrodipicolinate reductase
EAPIDJML_00304	CDS	1533				hypothetical protein
EAPIDJML_00305	CDS	1443	brnQ		COG1114	Branched-chain amino acid transport system 2 carrier protein
EAPIDJML_00306	CDS	1017	pyrD	1.3.5.2	COG0167	Dihydroorotate dehydrogenase (quinone)
EAPIDJML_00307	CDS	744	recO		COG1381	DNA repair protein RecO
EAPIDJML_00308	CDS	456	mlaD		COG1463	Intermembrane phospholipid transport system binding protein MlaD
EAPIDJML_00309	CDS	648	rnhB	3.1.26.4	COG0164	Ribonuclease HII
EAPIDJML_00310	CDS	1134	lpxB	2.4.1.182	COG0763	Lipid-A-disaccharide synthase
EAPIDJML_00311	CDS	789	lpxA	2.3.1.129	COG1043	Acyl-[acyl-carrier-protein]--UDP-N-acetylglucosamine O-acyltransferase
EAPIDJML_00312	CDS	441	fabZ	4.2.1.59		3-hydroxyacyl-[acyl-carrier-protein] dehydratase FabZ
EAPIDJML_00313	CDS	1035	lpxD	2.3.1.191	COG1044	UDP-3-O-(3-hydroxymyristoyl)glucosamine N-acyltransferase
EAPIDJML_00314	CDS	510	skp		COG2825	Chaperone protein Skp
EAPIDJML_00315	CDS	2391	bamA		COG4775	Outer membrane protein assembly factor BamA
EAPIDJML_00316	CDS	1350	rseP	3.4.24.-	COG0750	Regulator of sigma-E protease RseP
EAPIDJML_00317	CDS	1176	dxr	1.1.1.267	COG0743	1-deoxy-D-xylulose 5-phosphate reductoisomerase
EAPIDJML_00318	CDS	810				hypothetical protein
EAPIDJML_00319	CDS	720	ispU	2.5.1.31	COG0020	Ditrans,polycis-undecaprenyl-diphosphate synthase ((2E,6E)-farnesyl-diphosphate specific)
EAPIDJML_00320	CDS	546	frr		COG0233	Ribosome-recycling factor
EAPIDJML_00321	CDS	720	pyrH	2.7.4.22	COG0528	Uridylate kinase
EAPIDJML_00322	CDS	2424	rnr	3.1.13.1	COG0557	Ribonuclease R
EAPIDJML_00323	CDS	1011	lpxK	2.7.1.130	COG1663	Tetraacyldisaccharide 4'-kinase
EAPIDJML_00324	CDS	399	recX		COG2137	Regulatory protein RecX
EAPIDJML_00325	CDS	576				hypothetical protein
EAPIDJML_00326	CDS	1626				hypothetical protein
EAPIDJML_00327	CDS	2895			COG0247	putative protein
EAPIDJML_00328	CDS	1125	zapE		COG1485	Cell division protein ZapE
EAPIDJML_00329	CDS	456	tadA_1	3.5.4.33	COG0590	tRNA-specific adenosine deaminase
EAPIDJML_00330	CDS	561				hypothetical protein
EAPIDJML_00331	CDS	837	proC	1.5.1.2	COG0345	Pyrroline-5-carboxylate reductase
EAPIDJML_00332	tRNA	76				tRNA-Gly(gcc)
EAPIDJML_00333	tRNA	76				tRNA-Gly(gcc)
EAPIDJML_00334	tRNA	77				tRNA-Arg(acg)
EAPIDJML_00335	tRNA	77				tRNA-Arg(acg)
EAPIDJML_00336	CDS	363				hypothetical protein
EAPIDJML_00337	CDS	477	smpB		COG0691	SsrA-binding protein
EAPIDJML_00338	CDS	606				hypothetical protein
EAPIDJML_00339	CDS	366				hypothetical protein
EAPIDJML_00340	CDS	324				hypothetical protein
EAPIDJML_00341	tRNA	91				tRNA-Ser(gga)
EAPIDJML_00342	CDS	681				hypothetical protein
EAPIDJML_00343	CDS	771	hisN	3.1.3.15	COG0483	Histidinol-phosphatase
EAPIDJML_00344	CDS	762				hypothetical protein
EAPIDJML_00345	CDS	894	glyQ	6.1.1.14	COG0752	Glycine--tRNA ligase alpha subunit
EAPIDJML_00346	CDS	2289				hypothetical protein
EAPIDJML_00347	CDS	285	xseB	3.1.11.6	COG1722	Exodeoxyribonuclease 7 small subunit
EAPIDJML_00348	CDS	864		2.5.1.10		Farnesyl diphosphate synthase
EAPIDJML_00349	CDS	1854	dxs	2.2.1.7	COG1154	1-deoxy-D-xylulose-5-phosphate synthase
EAPIDJML_00350	CDS	303	ihfA		COG0776	Integration host factor subunit alpha
EAPIDJML_00351	CDS	2367	pheT	6.1.1.20	COG0072	Phenylalanine--tRNA ligase beta subunit
EAPIDJML_00352	CDS	1014	pheS	6.1.1.20	COG0016	Phenylalanine--tRNA ligase alpha subunit
EAPIDJML_00353	CDS	357	rplT		COG0292	50S ribosomal protein L20
EAPIDJML_00354	CDS	198	rpmI		COG0291	50S ribosomal protein L35
EAPIDJML_00355	CDS	462	infC		COG0290	Translation initiation factor IF-3
EAPIDJML_00356	CDS	1917	thrS	6.1.1.3	COG0441	Threonine--tRNA ligase
EAPIDJML_00357	CDS	405				hypothetical protein
EAPIDJML_00358	CDS	597				hypothetical protein
EAPIDJML_00359	CDS	741	mipA_1		COG3713	MltA-interacting protein
EAPIDJML_00360	CDS	1386	davT_2	2.6.1.48	COG0160	5-aminovalerate aminotransferase DavT
EAPIDJML_00361	CDS	1074				hypothetical protein
EAPIDJML_00362	CDS	858				hypothetical protein
EAPIDJML_00363	CDS	414	arnE_1			4-amino-4-deoxy-L-arabinose-phosphoundecaprenol flippase subunit ArnE
EAPIDJML_00364	CDS	360	arnE_2			4-amino-4-deoxy-L-arabinose-phosphoundecaprenol flippase subunit ArnE
EAPIDJML_00365	CDS	828		3.1.1.23		Thermostable monoacylglycerol lipase
EAPIDJML_00366	CDS	654	mtnX	3.1.3.87	COG4359	2-hydroxy-3-keto-5-methylthiopentenyl-1-phosphate phosphatase
EAPIDJML_00367	CDS	681	rstA		COG0745	Transcriptional regulatory protein RstA
EAPIDJML_00368	CDS	1338	rstB	2.7.13.3		Sensor protein RstB
EAPIDJML_00369	CDS	810				hypothetical protein
EAPIDJML_00370	CDS	1452				hypothetical protein
EAPIDJML_00371	CDS	1737	ade	3.5.4.2	COG1001	Adenine deaminase
EAPIDJML_00372	CDS	1803	adeC	3.5.4.2		Adenine deaminase
EAPIDJML_00373	CDS	1302	adeP		COG2252	Adenine permease AdeP
EAPIDJML_00374	CDS	618	argO			Arginine exporter protein ArgO
EAPIDJML_00375	CDS	375	lrp		COG1522	Leucine-responsive regulatory protein
EAPIDJML_00376	CDS	1878	ftsH_1	3.4.24.-	COG0465	ATP-dependent zinc metalloprotease FtsH
EAPIDJML_00377	CDS	636	rlmE	2.1.1.166	COG0293	Ribosomal RNA large subunit methyltransferase E
EAPIDJML_00378	CDS	711	rsuA_1	5.4.99.19	COG1187	Ribosomal small subunit pseudouridine synthase A
EAPIDJML_00379	CDS	303	yhbY		COG1534	RNA-binding protein YhbY
EAPIDJML_00380	CDS	528				hypothetical protein
EAPIDJML_00381	CDS	375				hypothetical protein
EAPIDJML_00382	CDS	615				hypothetical protein
EAPIDJML_00383	CDS	1179	lplT			Lysophospholipid transporter LplT
EAPIDJML_00384	CDS	2142	aas_1		COG0204	Bifunctional protein Aas
EAPIDJML_00385	CDS	519	dhfrIII	1.5.1.3		Dihydrofolate reductase type 3
EAPIDJML_00386	CDS	741	ccmC		COG0755	Heme exporter protein C
EAPIDJML_00387	CDS	174				hypothetical protein
EAPIDJML_00388	CDS	471	ccmE		COG2332	Cytochrome c-type biogenesis protein CcmE
EAPIDJML_00389	CDS	1983	ccmF		COG1138	Cytochrome c-type biogenesis protein CcmF
EAPIDJML_00390	CDS	552	dsbE		COG0526	Thiol:disulfide interchange protein DsbE
EAPIDJML_00391	CDS	459	ccmH		COG3088	Cytochrome c-type biogenesis protein CcmH
EAPIDJML_00392	CDS	1728				hypothetical protein
EAPIDJML_00393	CDS	636	ccmA	7.6.2.5	COG4133	Cytochrome c biogenesis ATP-binding export protein CcmA
EAPIDJML_00394	CDS	669	ccmB		COG2386	Heme exporter protein B
EAPIDJML_00395	CDS	2097	ftsH_2	3.4.24.-		ATP-dependent zinc metalloprotease FtsH
EAPIDJML_00396	CDS	1119				hypothetical protein
EAPIDJML_00397	CDS	1494	gabD_2	1.2.1.79	COG1012	Succinate-semialdehyde dehydrogenase [NADP(+)]
EAPIDJML_00398	CDS	1035		1.5.1.49	COG2055	Delta(1)-pyrroline-2-carboxylate reductase 1
EAPIDJML_00399	CDS	1299	puuB	1.4.3.-		Gamma-glutamylputrescine oxidoreductase
EAPIDJML_00400	CDS	1557	ilvI_1	2.2.1.6	COG0028	Acetolactate synthase isozyme 3 large subunit
EAPIDJML_00401	CDS	915	gcvA			Glycine cleavage system transcriptional activator
EAPIDJML_00402	CDS	1320	proP_1			Proline/betaine transporter
EAPIDJML_00403	CDS	1095				hypothetical protein
EAPIDJML_00404	CDS	927				hypothetical protein
EAPIDJML_00405	CDS	789	nimR_2			HTH-type transcriptional regulator NimR
EAPIDJML_00406	CDS	864	mltC	4.2.2.-		Membrane-bound lytic murein transglycosylase C
EAPIDJML_00407	CDS	789				hypothetical protein
EAPIDJML_00408	CDS	1080				hypothetical protein
EAPIDJML_00409	CDS	366	hdeA			Acid stress chaperone HdeA
EAPIDJML_00410	CDS	396				hypothetical protein
EAPIDJML_00411	CDS	1392				hypothetical protein
EAPIDJML_00412	CDS	1776	thiC	4.1.99.17	COG0422	Phosphomethylpyrimidine synthase
EAPIDJML_00413	CDS	390	panD	4.1.1.11	COG0853	Aspartate 1-decarboxylase
EAPIDJML_00414	CDS	1197			COG2081	putative protein
EAPIDJML_00415	CDS	528				hypothetical protein
EAPIDJML_00416	CDS	831	glnH		COG0834	ABC transporter glutamine-binding protein GlnH
EAPIDJML_00417	CDS	729	glnQ			Glutamine transport ATP-binding protein GlnQ
EAPIDJML_00418	CDS	681				hypothetical protein
EAPIDJML_00419	CDS	663				hypothetical protein
EAPIDJML_00420	CDS	936	cysK1	2.5.1.47	COG0031	O-acetylserine sulfhydrylase
EAPIDJML_00421	CDS	441	cymR_1			HTH-type transcriptional regulator CymR
EAPIDJML_00422	CDS	1458	aspA	4.3.1.1	COG1027	Aspartate ammonia-lyase
EAPIDJML_00423	CDS	1173	hipO_1	3.5.1.32	COG1473	Hippurate hydrolase
EAPIDJML_00424	CDS	1503	abgT_1		COG2978	p-aminobenzoyl-glutamate transport protein
EAPIDJML_00425	CDS	1239	guaA_1	6.3.5.2		GMP synthase [glutamine-hydrolyzing]
EAPIDJML_00426	CDS	543	adk	2.7.4.3	COG0563	Adenylate kinase
EAPIDJML_00427	CDS	693				hypothetical protein
EAPIDJML_00428	CDS	1173	argD	2.6.1.11	COG4992	Acetylornithine aminotransferase
EAPIDJML_00429	CDS	897	argB	2.7.2.8	COG0548	Acetylglutamate kinase
EAPIDJML_00430	CDS	1218	argJ		COG1364	Arginine biosynthesis bifunctional protein ArgJ
EAPIDJML_00431	CDS	1047	argC	1.2.1.38	COG0002	N-acetyl-gamma-glutamyl-phosphate reductase
EAPIDJML_00432	CDS	654				hypothetical protein
EAPIDJML_00433	CDS	1566	abgT_2		COG2978	p-aminobenzoyl-glutamate transport protein
EAPIDJML_00434	tRNA	77				tRNA-Asn(gtt)
EAPIDJML_00435	CDS	975				hypothetical protein
EAPIDJML_00436	CDS	939	miaA	2.5.1.75	COG0324	tRNA dimethylallyltransferase
EAPIDJML_00437	CDS	954	kamA	5.4.3.2		L-lysine 2,3-aminomutase
EAPIDJML_00438	CDS	615	hflD		COG2915	High frequency lysogenization protein HflD
EAPIDJML_00439	CDS	732	sfsA		COG1489	Sugar fermentation stimulation protein A
EAPIDJML_00440	CDS	714	rph	2.7.7.56		Ribonuclease PH
EAPIDJML_00441	CDS	219	infA		COG0361	Translation initiation factor IF-1
EAPIDJML_00442	tRNA	77				tRNA-Pro(ggg)
EAPIDJML_00443	CDS	1437	oprM		COG1538	Outer membrane protein OprM
EAPIDJML_00444	CDS	1128				hypothetical protein
EAPIDJML_00445	CDS	432	tolR		COG0848	Tol-Pal system protein TolR
EAPIDJML_00446	CDS	708	tolQ_2		COG0811	Tol-Pal system protein TolQ
EAPIDJML_00447	CDS	399	ybgC	3.1.2.-	COG0824	Acyl-CoA thioesterase YbgC
EAPIDJML_00448	tRNA	77				tRNA-Asn(gtt)
EAPIDJML_00449	CDS	846	corC		COG4535	Magnesium and cobalt efflux protein CorC
EAPIDJML_00450	CDS	2379	mrcB		COG0744	Penicillin-binding protein 1B
EAPIDJML_00451	CDS	747				hypothetical protein
EAPIDJML_00452	CDS	2856	rne	3.1.26.12		Ribonuclease E
EAPIDJML_00453	CDS	1413				hypothetical protein
EAPIDJML_00454	CDS	2082	ppk	2.7.4.1		Polyphosphate kinase
EAPIDJML_00455	CDS	1806				hypothetical protein
EAPIDJML_00456	CDS	1203	tyrB	2.6.1.57	COG1448	Aromatic-amino-acid aminotransferase
EAPIDJML_00457	CDS	99				hypothetical protein
EAPIDJML_00458	CDS	960	birA	6.3.4.15	COG0340	Bifunctional ligase/repressor BirA
EAPIDJML_00459	CDS	744	coaX	2.7.1.33	COG1521	Type III pantothenate kinase
EAPIDJML_00460	CDS	597				hypothetical protein
EAPIDJML_00461	CDS	516				hypothetical protein
EAPIDJML_00462	CDS	2163	priA	3.6.4.-	COG1198	Primosomal protein N'
EAPIDJML_00463	CDS	999	sohB	3.4.21.-	COG0616	putative protease SohB
EAPIDJML_00464	CDS	825	cbf2	5.2.1.8	COG0760	Putative peptidyl-prolyl cis-trans isomerase Cbf2
EAPIDJML_00465	CDS	270	bolA		COG0271	DNA-binding transcriptional regulator BolA
EAPIDJML_00466	CDS	576	yciB		COG2917	Intracellular septation protein
EAPIDJML_00467	CDS	945	fabD	2.3.1.39	COG0331	Malonyl CoA-acyl carrier protein transacylase
EAPIDJML_00468	CDS	954	fabH	2.3.1.180	COG0332	3-oxoacyl-[acyl-carrier-protein] synthase 3
EAPIDJML_00469	CDS	1056	plsX	2.3.1.274	COG0416	Phosphate acyltransferase
EAPIDJML_00470	CDS	195	rpmF		COG0333	50S ribosomal protein L32
EAPIDJML_00471	CDS	501	yceD		COG1399	Large ribosomal RNA subunit accumulation protein YceD
EAPIDJML_00472	CDS	486	moaC	4.6.1.17	COG0315	Cyclic pyranopterin monophosphate synthase
EAPIDJML_00473	CDS	450				hypothetical protein
EAPIDJML_00474	CDS	990				hypothetical protein
EAPIDJML_00475	CDS	411				hypothetical protein
EAPIDJML_00476	CDS	291	zapA		COG3027	Cell division protein ZapA
EAPIDJML_00477	CDS	339				hypothetical protein
EAPIDJML_00478	CDS	1209	ubiI	1.14.13.240	COG0654	2-octaprenylphenol hydroxylase
EAPIDJML_00479	CDS	1170	ubiH	1.14.13.-	COG0654	2-octaprenyl-6-methoxyphenol hydroxylase
EAPIDJML_00480	CDS	768	map	3.4.11.18	COG0024	Methionine aminopeptidase
EAPIDJML_00481	CDS	570	dcd	3.5.4.13		dCTP deaminase
EAPIDJML_00482	CDS	1083	apbC		COG0489	Iron-sulfur cluster carrier protein
EAPIDJML_00483	CDS	657				hypothetical protein
EAPIDJML_00484	CDS	462				hypothetical protein
EAPIDJML_00485	CDS	1503	nnr		COG0062	Bifunctional NAD(P)H-hydrate repair enzyme Nnr
EAPIDJML_00486	CDS	1359	norM		COG0534	Multidrug resistance protein NorM
EAPIDJML_00487	CDS	666				hypothetical protein
EAPIDJML_00488	CDS	2610	gyrA	5.6.2.2	COG0188	DNA gyrase subunit A
EAPIDJML_00489	CDS	810	hmuV	3.6.3.-	COG4559	Hemin import ATP-binding protein HmuV
EAPIDJML_00490	CDS	969	hmuU_1		COG0609	Hemin transport system permease protein HmuU
EAPIDJML_00491	CDS	867	btuF_2			Vitamin B12-binding protein
EAPIDJML_00492	CDS	2244	hemR		COG1629	Hemin receptor
EAPIDJML_00493	CDS	1362	adhB_1	1.1.5.5		Alcohol dehydrogenase (quinone), cytochrome c subunit
EAPIDJML_00494	CDS	903	tsdA_1	1.8.2.2	COG3258	Thiosulfate dehydrogenase
EAPIDJML_00495	CDS	867	hcpC	3.5.2.6	COG0790	Putative beta-lactamase HcpC
EAPIDJML_00496	CDS	471	bfr_1	1.16.3.1	COG2193	Bacterioferritin
EAPIDJML_00497	CDS	465	bfr_2	1.16.3.1	COG2193	Bacterioferritin
EAPIDJML_00498	CDS	573	tag	3.2.2.20	COG2818	DNA-3-methyladenine glycosylase 1
EAPIDJML_00499	CDS	738	mipA_2		COG3713	MltA-interacting protein
EAPIDJML_00500	CDS	759	cysZ		COG2981	Sulfate transporter CysZ
EAPIDJML_00501	CDS	576	rppH_2	3.6.1.-	COG0494	RNA pyrophosphohydrolase
EAPIDJML_00502	CDS	984	acuI	1.3.1.84	COG0604	putative acrylyl-CoA reductase AcuI
EAPIDJML_00503	CDS	174				hypothetical protein
EAPIDJML_00504	CDS	2100	pnp	2.7.7.8	COG1185	Polyribonucleotide nucleotidyltransferase
EAPIDJML_00505	CDS	267	rpsO		COG0184	30S ribosomal protein S15
EAPIDJML_00506	CDS	486				hypothetical protein
EAPIDJML_00507	CDS	1218	roxA	1.14.11.47	COG2850	50S ribosomal protein L16 3-hydroxylase
EAPIDJML_00508	CDS	2340	rcsC_1	2.7.13.3		Sensor histidine kinase RcsC
EAPIDJML_00509	CDS	2199	spoT	3.1.7.2	COG0317	Guanosine-3',5'-bis(diphosphate) 3'-pyrophosphohydrolase
EAPIDJML_00510	CDS	261	rpoZ	2.7.7.6		DNA-directed RNA polymerase subunit omega
EAPIDJML_00511	CDS	633	gmk	2.7.4.8	COG0194	Guanylate kinase
EAPIDJML_00512	CDS	642				hypothetical protein
EAPIDJML_00513	CDS	741	tcdA	6.1.-.-	COG1179	tRNA threonylcarbamoyladenosine dehydratase
EAPIDJML_00514	CDS	1119	pilT_1		COG2805	Twitching mobility protein
EAPIDJML_00515	CDS	432	nusB			Transcription antitermination protein NusB
EAPIDJML_00516	CDS	4158	rpoC	2.7.7.6	COG0086	DNA-directed RNA polymerase subunit beta'
EAPIDJML_00517	CDS	4119	rpoB	2.7.7.6		DNA-directed RNA polymerase subunit beta
EAPIDJML_00518	CDS	369	rplL			50S ribosomal protein L7/L12
EAPIDJML_00519	CDS	504	rplJ		COG0244	50S ribosomal protein L10
EAPIDJML_00520	CDS	693	rplA		COG0081	50S ribosomal protein L1
EAPIDJML_00521	CDS	432	rplK		COG0080	50S ribosomal protein L11
EAPIDJML_00522	CDS	528	nusG		COG0250	Transcription termination/antitermination protein NusG
EAPIDJML_00523	CDS	393	secE			Protein translocase subunit SecE
EAPIDJML_00524	tRNA	76				tRNA-Trp(cca)
EAPIDJML_00525	CDS	1191	tufA_1		COG0050	Elongation factor Tu
EAPIDJML_00526	tRNA	76				tRNA-Thr(ggt)
EAPIDJML_00527	tRNA	74				tRNA-Gly(tcc)
EAPIDJML_00528	tRNA	85				tRNA-Tyr(gta)
EAPIDJML_00529	CDS	1635				hypothetical protein
EAPIDJML_00530	CDS	522				hypothetical protein
EAPIDJML_00531	CDS	615	sodA	1.15.1.1		Superoxide dismutase [Mn]
EAPIDJML_00532	CDS	309				hypothetical protein
EAPIDJML_00533	CDS	879	pdxY	2.7.1.35	COG2240	Pyridoxal kinase PdxY
EAPIDJML_00534	CDS	1632	nfdA	3.5.1.91		N-substituted formamide deformylase
EAPIDJML_00535	tRNA	86				tRNA-Leu(caa)
EAPIDJML_00536	CDS	1056	cas9	3.1.-.-		CRISPR-associated endonuclease Cas9
EAPIDJML_00537	CDS	591				hypothetical protein
EAPIDJML_00538	CDS	312				hypothetical protein
EAPIDJML_00539	CDS	702	nagK	3.7.1.20		Fumarylpyruvate hydrolase
EAPIDJML_00540	CDS	297	phnX	3.11.1.1		Phosphonoacetaldehyde hydrolase
EAPIDJML_00541	CDS	672	estB	3.1.1.1	COG0400	Carboxylesterase 2
EAPIDJML_00542	CDS	1017				hypothetical protein
EAPIDJML_00543	CDS	1017	ynaI		COG0668	Low conductance mechanosensitive channel YnaI
EAPIDJML_00544	CDS	1428	prpD	4.2.1.79	COG2079	2-methylcitrate dehydratase
EAPIDJML_00545	CDS	1161	prpC	2.3.3.5	COG0372	2-methylcitrate synthase
EAPIDJML_00546	CDS	888	prpB	4.1.3.30	COG2513	2-methylisocitrate lyase
EAPIDJML_00547	CDS	1623	prpR		COG1221	Propionate catabolism operon regulatory protein
EAPIDJML_00548	CDS	1479	yflS		COG0471	Putative malate transporter YflS
EAPIDJML_00549	CDS	1029				hypothetical protein
EAPIDJML_00550	CDS	768	thiG	2.8.1.10	COG2022	Thiazole synthase
EAPIDJML_00551	CDS	207	thiS		COG2104	Sulfur carrier protein ThiS
EAPIDJML_00552	CDS	633	tenI	5.3.99.10	COG0352	Thiazole tautomerase
EAPIDJML_00553	CDS	930				hypothetical protein
EAPIDJML_00554	CDS	1320	rarA		COG2256	Replication-associated recombination protein A
EAPIDJML_00555	CDS	618	lolA			Outer-membrane lipoprotein carrier protein
EAPIDJML_00556	CDS	912	cheB_1	3.5.1.44		Protein-glutamate methylesterase/protein-glutamine glutaminase
EAPIDJML_00557	CDS	1755	sasA_2	2.7.-.-		Adaptive-response sensory-kinase SasA
EAPIDJML_00558	CDS	321				hypothetical protein
EAPIDJML_00559	CDS	918	glaH	1.14.11.-		Glutarate 2-hydroxylase
EAPIDJML_00560	CDS	429	zntR		COG0789	HTH-type transcriptional regulator ZntR
EAPIDJML_00561	CDS	2178	cadA	3.6.3.3		Cadmium-transporting ATPase
EAPIDJML_00562	CDS	291	groS		COG0234	10 kDa chaperonin
EAPIDJML_00563	CDS	1641	groL		COG0459	60 kDa chaperonin
EAPIDJML_00564	CDS	1380	yhdG		COG0531	putative amino acid permease YhdG
EAPIDJML_00565	CDS	1305	davT_3	2.6.1.48	COG0160	5-aminovalerate aminotransferase DavT
EAPIDJML_00566	CDS	1389	gabD_3	1.2.1.79	COG1012	Succinate-semialdehyde dehydrogenase [NADP(+)]
EAPIDJML_00567	CDS	1215	lhgD	1.1.5.-	COG0579	L-2-hydroxyglutarate dehydrogenase
EAPIDJML_00568	CDS	711	rspR		COG1802	HTH-type transcriptional repressor RspR
EAPIDJML_00569	CDS	1428				hypothetical protein
EAPIDJML_00570	CDS	1185	lnrN		COG0842	Linearmycin resistance permease protein LnrN
EAPIDJML_00571	CDS	1197	rbbA_1		COG0842	Ribosome-associated ATPase
EAPIDJML_00572	CDS	987				hypothetical protein
EAPIDJML_00573	CDS	153				hypothetical protein
EAPIDJML_00574	CDS	984				hypothetical protein
EAPIDJML_00575	CDS	1434	ltxD_1			Leukotoxin export protein LtxD
EAPIDJML_00576	CDS	2142	apxIB		COG2274	Toxin RTX-I translocation ATP-binding protein
EAPIDJML_00577	CDS	1563	tnsE			Transposon Tn7 transposition protein TnsE
EAPIDJML_00578	CDS	1557				hypothetical protein
EAPIDJML_00579	CDS	1677	tnsC			Transposon Tn7 transposition protein TnsC
EAPIDJML_00580	CDS	2103	tnsB			Transposon Tn7 transposition protein TnsB
EAPIDJML_00581	CDS	816	tnsA			Transposon Tn7 transposition protein TnsA
EAPIDJML_00582	CDS	1791	glmS_1	2.6.1.16	COG0449	Glutamine--fructose-6-phosphate aminotransferase [isomerizing]
EAPIDJML_00583	CDS	1455	der_2		COG1160	GTPase Der
EAPIDJML_00584	CDS	1149	bamB		COG1520	Outer membrane protein assembly factor BamB
EAPIDJML_00585	CDS	618				hypothetical protein
EAPIDJML_00586	CDS	1278	hisS	6.1.1.21	COG0124	Histidine--tRNA ligase
EAPIDJML_00587	CDS	1005	rodZ		COG1426	Cytoskeleton protein RodZ
EAPIDJML_00588	CDS	732	bepA_1	3.4.-.-		Beta-barrel assembly-enhancing protease
EAPIDJML_00589	CDS	1116	rlmN	2.1.1.192	COG0820	Dual-specificity RNA methyltransferase RlmN
EAPIDJML_00590	CDS	441	ndk	2.7.4.6		Nucleoside diphosphate kinase
EAPIDJML_00591	CDS	2184	uvrD	3.6.4.12	COG0210	DNA helicase II
EAPIDJML_00592	CDS	435	yqjC			Protein YqjC
EAPIDJML_00593	CDS	1203	ynfM			Inner membrane transport protein YnfM
EAPIDJML_00594	CDS	381	ygiW		COG3111	Protein YgiW
EAPIDJML_00595	CDS	1269	xseA	3.1.11.6	COG1570	Exodeoxyribonuclease 7 large subunit
EAPIDJML_00596	CDS	762	mazG	3.6.1.8	COG1694	Nucleoside triphosphate pyrophosphohydrolase
EAPIDJML_00597	CDS	1941	yoaA	3.6.4.12	COG1199	putative ATP-dependent DNA helicase YoaA
EAPIDJML_00598	CDS	621	plsY	2.3.1.15	COG0344	putative glycerol-3-phosphate acyltransferase
EAPIDJML_00599	CDS	1458	rpoN		COG1508	RNA polymerase sigma-54 factor
EAPIDJML_00600	CDS	681	cpxR_2		COG0745	Transcriptional regulatory protein CpxR
EAPIDJML_00601	CDS	1392	sasA_3	2.7.-.-		Adaptive-response sensory-kinase SasA
EAPIDJML_00602	CDS	1041				hypothetical protein
EAPIDJML_00603	CDS	951	yadG		COG1131	putative ABC transporter ATP-binding protein YadG
EAPIDJML_00604	CDS	774	yadH		COG0842	Inner membrane transport permease YadH
EAPIDJML_00605	CDS	753	mlaA		COG2853	Intermembrane phospholipid transport system lipoprotein MlaA
EAPIDJML_00606	CDS	918	lpxL	2.3.1.241	COG1560	Lipid A biosynthesis lauroyltransferase
EAPIDJML_00607	CDS	738	rsmE	2.1.1.193	COG1385	Ribosomal RNA small subunit methyltransferase E
EAPIDJML_00608	CDS	969	gshB_1	6.3.2.3	COG0189	Glutathione synthetase
EAPIDJML_00609	CDS	561				hypothetical protein
EAPIDJML_00610	CDS	675		3.1.3.-	COG0637	Phosphorylated carbohydrates phosphatase
EAPIDJML_00611	CDS	750	rsmJ	2.1.1.242		Ribosomal RNA small subunit methyltransferase J
EAPIDJML_00612	CDS	852	nfo	3.1.21.2	COG0648	Endonuclease 4
EAPIDJML_00613	CDS	774				hypothetical protein
EAPIDJML_00614	CDS	957	nagZ	3.2.1.52	COG1472	Beta-hexosaminidase
EAPIDJML_00615	CDS	1008	ruvB	3.6.4.12	COG2255	Holliday junction ATP-dependent DNA helicase RuvB
EAPIDJML_00616	CDS	438	dtd	3.1.1.96	COG1490	D-aminoacyl-tRNA deacylase
EAPIDJML_00617	CDS	510	lptE			LPS-assembly lipoprotein LptE
EAPIDJML_00618	CDS	2088				hypothetical protein
EAPIDJML_00619	CDS	1317	rimO	2.8.4.4	COG0621	Ribosomal protein S12 methylthiotransferase RimO
EAPIDJML_00620	CDS	477	gpt	2.4.2.22	COG0503	Xanthine phosphoribosyltransferase
EAPIDJML_00621	CDS	903	lpxP	2.3.1.242	COG1560	Lipid A biosynthesis palmitoleoyltransferase
EAPIDJML_00622	CDS	1020	rfaC	2.-.-.-	COG0859	Lipopolysaccharide heptosyltransferase 1
EAPIDJML_00623	CDS	516	fabA	4.2.1.59	COG0764	3-hydroxydecanoyl-[acyl-carrier-protein] dehydratase
EAPIDJML_00624	CDS	1221	fabB	2.3.1.41		3-oxoacyl-[acyl-carrier-protein] synthase 1
EAPIDJML_00625	CDS	471	rlmH	2.1.1.177	COG1576	Ribosomal RNA large subunit methyltransferase H
EAPIDJML_00626	CDS	315	rsfS			Ribosomal silencing factor RsfS
EAPIDJML_00627	CDS	1284	hemL	5.4.3.8	COG0001	Glutamate-1-semialdehyde 2,1-aminomutase
EAPIDJML_00628	CDS	672	rpe	5.1.3.1	COG0036	Ribulose-phosphate 3-epimerase
EAPIDJML_00629	CDS	1038	pilT_2		COG2805	Twitching mobility protein
EAPIDJML_00630	CDS	237	rpmB		COG0227	50S ribosomal protein L28
EAPIDJML_00631	CDS	168	rpmG		COG0267	50S ribosomal protein L33
EAPIDJML_00632	CDS	1029	metN	3.6.3.-	COG1135	Methionine import ATP-binding protein MetN
EAPIDJML_00633	CDS	738				hypothetical protein
EAPIDJML_00634	CDS	774	metQ_1		COG1464	D-methionine-binding lipoprotein MetQ
EAPIDJML_00635	CDS	267	rpsT		COG0268	30S ribosomal protein S20
EAPIDJML_00636	CDS	2751	secA		COG0653	Protein translocase subunit SecA
EAPIDJML_00637	CDS	1110	proB	2.7.2.11		Glutamate 5-kinase
EAPIDJML_00638	CDS	1401	leuC	4.2.1.33	COG0065	3-isopropylmalate dehydratase large subunit
EAPIDJML_00639	CDS	666	leuD	4.2.1.33	COG0066	3-isopropylmalate dehydratase small subunit
EAPIDJML_00640	CDS	2607	alaS	6.1.1.7	COG0013	Alanine--tRNA ligase
EAPIDJML_00641	CDS	1083	adh	1.1.1.1	COG1063	Alcohol dehydrogenase
EAPIDJML_00642	CDS	2028	cirA_1		COG4771	Colicin I receptor
EAPIDJML_00643	CDS	516				hypothetical protein
EAPIDJML_00644	CDS	561	tsaC	2.7.7.87	COG0009	Threonylcarbamoyl-AMP synthase
EAPIDJML_00645	CDS	1467	pitA_1		COG0306	Low-affinity inorganic phosphate transporter 1
EAPIDJML_00646	CDS	1338	garB	1.8.1.16		Glutathione amide reductase
EAPIDJML_00647	CDS	603				hypothetical protein
EAPIDJML_00648	CDS	867	rpoH		COG0568	RNA polymerase sigma factor RpoH
EAPIDJML_00649	CDS	2322	maeB	1.1.1.40	COG0280	NADP-dependent malic enzyme
EAPIDJML_00650	CDS	699	nlpD			Murein hydrolase activator NlpD
EAPIDJML_00651	CDS	432	mopA		COG2005	Molybdenum-pterin-binding protein MopA
EAPIDJML_00652	CDS	828	panC	6.3.2.1		Pantothenate synthetase
EAPIDJML_00653	CDS	792	panB	2.1.2.11	COG0413	3-methyl-2-oxobutanoate hydroxymethyltransferase
EAPIDJML_00654	CDS	939				hypothetical protein
EAPIDJML_00655	CDS	768	opuCA		COG1125	Glycine betaine/carnitine/choline transport ATP-binding protein OpuCA
EAPIDJML_00656	CDS	846				hypothetical protein
EAPIDJML_00657	CDS	969				hypothetical protein
EAPIDJML_00658	CDS	285	trpR			Trp operon repressor
EAPIDJML_00659	CDS	1356	proP_2			Proline/betaine transporter
EAPIDJML_00660	CDS	936	lysO		COG2431	Lysine exporter LysO
EAPIDJML_00661	CDS	828	murI_1	5.1.1.3		Glutamate racemase
EAPIDJML_00662	CDS	924	glsA1	3.5.1.2	COG2066	Glutaminase 1
EAPIDJML_00663	CDS	1470	gadC_1		COG0531	Glutamate/gamma-aminobutyrate antiporter
EAPIDJML_00664	CDS	684	ygaZ		COG1296	Inner membrane protein YgaZ
EAPIDJML_00665	CDS	339				hypothetical protein
EAPIDJML_00666	CDS	1413	glnA	6.3.1.2	COG0174	Glutamine synthetase
EAPIDJML_00667	CDS	708	queE	4.3.99.3	COG0602	7-carboxy-7-deazaguanine synthase
EAPIDJML_00668	CDS	426	queD	4.1.2.50	COG0720	6-carboxy-5,6,7,8-tetrahydropterin synthase
EAPIDJML_00669	CDS	663	queC	6.3.4.20	COG0603	7-cyano-7-deazaguanine synthase
EAPIDJML_00670	CDS	1260	gltS_1		COG0786	Sodium/glutamate symporter
EAPIDJML_00671	CDS	2220	icd2	1.1.1.42		Isocitrate dehydrogenase [NADP] 2
EAPIDJML_00672	CDS	549				hypothetical protein
EAPIDJML_00673	CDS	1428	gatB	6.3.5.-	COG0064	Aspartyl/glutamyl-tRNA(Asn/Gln) amidotransferase subunit B
EAPIDJML_00674	CDS	1446	gatA	6.3.5.7	COG0154	Glutamyl-tRNA(Gln) amidotransferase subunit A
EAPIDJML_00675	CDS	291	gatC	6.3.5.-	COG0721	Glutamyl-tRNA(Gln) amidotransferase subunit C
EAPIDJML_00676	CDS	207				hypothetical protein
EAPIDJML_00677	CDS	2433	copA_1	7.2.2.8		putative copper-importing P-type ATPase A
EAPIDJML_00678	CDS	822				hypothetical protein
EAPIDJML_00679	CDS	1410				hypothetical protein
EAPIDJML_00680	CDS	942	fixP		COG2010	Cbb3-type cytochrome c oxidase subunit FixP
EAPIDJML_00681	CDS	267				hypothetical protein
EAPIDJML_00682	CDS	807				hypothetical protein
EAPIDJML_00683	CDS	1461	ccoN1	1.9.3.1	COG3278	Cbb3-type cytochrome c oxidase subunit CcoN1
EAPIDJML_00684	CDS	1371	dgt	3.1.5.1	COG0232	Deoxyguanosinetriphosphate triphosphohydrolase
EAPIDJML_00685	CDS	1029	tsaD	2.3.1.234	COG0533	tRNA N6-adenosine threonylcarbamoyltransferase
EAPIDJML_00686	CDS	369	dgkA	2.7.1.107	COG0818	Diacylglycerol kinase
EAPIDJML_00687	CDS	144				hypothetical protein
EAPIDJML_00688	CDS	2484	topA	5.6.2.1		DNA topoisomerase 1
EAPIDJML_00689	CDS	1380	ntrC		COG2204	DNA-binding transcriptional regulator NtrC
EAPIDJML_00690	CDS	711			COG0325	Pyridoxal phosphate homeostasis protein
EAPIDJML_00691	CDS	1932	dnaK		COG0443	Chaperone protein DnaK
EAPIDJML_00692	CDS	1167	dnaJ		COG0484	Chaperone protein DnaJ
EAPIDJML_00693	CDS	840				hypothetical protein
EAPIDJML_00694	CDS	1572	abgT_3		COG2978	p-aminobenzoyl-glutamate transport protein
EAPIDJML_00695	CDS	321				hypothetical protein
EAPIDJML_00696	CDS	336	gdnD		COG2076	putative guanidinium efflux system subunit GdnD
EAPIDJML_00697	CDS	348				hypothetical protein
EAPIDJML_00698	CDS	855	rhtA		COG5006	Threonine/homoserine exporter RhtA
EAPIDJML_00699	CDS	957	yclN		COG4606	Petrobactin import system permease protein YclN
EAPIDJML_00700	CDS	948	yclO		COG4605	Petrobactin import system permease protein YclO
EAPIDJML_00701	CDS	759	yclP	7.2.2.-	COG4604	Petrobactin import ATP-binding protein YclP
EAPIDJML_00702	CDS	1005	yclQ		COG4607	Petrobactin-binding protein YclQ
EAPIDJML_00703	CDS	852	yfdC		COG2116	Inner membrane protein YfdC
EAPIDJML_00704	CDS	603				hypothetical protein
EAPIDJML_00705	CDS	861	corA_1		COG0598	Cobalt/magnesium transport protein CorA
EAPIDJML_00706	CDS	951	zntB			Zinc transport protein ZntB
EAPIDJML_00707	CDS	900				hypothetical protein
EAPIDJML_00708	CDS	864				hypothetical protein
EAPIDJML_00709	CDS	564	yceI		COG2353	Protein YceI
EAPIDJML_00710	CDS	630				hypothetical protein
EAPIDJML_00711	CDS	468	ribH	2.5.1.78	COG0054	6,7-dimethyl-8-ribityllumazine synthase
EAPIDJML_00712	CDS	1206	ribBA		COG0108	Riboflavin biosynthesis protein RibBA
EAPIDJML_00713	CDS	624	ribE	2.5.1.9	COG0307	Riboflavin synthase
EAPIDJML_00714	CDS	1107	ribD		COG0117	Riboflavin biosynthesis protein RibD
EAPIDJML_00715	CDS	903	dmlR_1			HTH-type transcriptional regulator DmlR
EAPIDJML_00716	CDS	414	yqjF		COG2259	Inner membrane protein YqjF
EAPIDJML_00717	CDS	1332	mepA_2		COG0534	Multidrug export protein MepA
EAPIDJML_00718	CDS	1428	lpd	1.8.1.4		Dihydrolipoyl dehydrogenase
EAPIDJML_00719	CDS	1206	sucB	2.3.1.61	COG0508	Dihydrolipoyllysine-residue succinyltransferase component of 2-oxoglutarate dehydrogenase complex
EAPIDJML_00720	CDS	2835	sucA	1.2.4.2	COG0567	2-oxoglutarate dehydrogenase E1 component
EAPIDJML_00721	CDS	873	oxyR			Hydrogen peroxide-inducible genes activator
EAPIDJML_00722	CDS	978	moaA	4.1.99.22	COG2896	GTP 3',8-cyclase
EAPIDJML_00723	CDS	207				hypothetical protein
EAPIDJML_00724	CDS	714				hypothetical protein
EAPIDJML_00725	CDS	1065	sfmM2	2.1.1.304		L-tyrosine C(3)-methyltransferase
EAPIDJML_00726	CDS	687				hypothetical protein
EAPIDJML_00727	CDS	789	aas_2	6.2.1.20		Bifunctional protein Aas
EAPIDJML_00728	CDS	261	acpP_1			Acyl carrier protein
EAPIDJML_00729	CDS	246	acpP_2		COG0236	Acyl carrier protein
EAPIDJML_00730	CDS	591				hypothetical protein
EAPIDJML_00731	CDS	1311	dltA	6.2.1.54		D-alanine--D-alanyl carrier protein ligase
EAPIDJML_00732	CDS	351				hypothetical protein
EAPIDJML_00733	CDS	741				hypothetical protein
EAPIDJML_00734	CDS	969				hypothetical protein
EAPIDJML_00735	CDS	438		3.1.2.28		1,4-dihydroxy-2-naphthoyl-CoA hydrolase
EAPIDJML_00736	CDS	597				hypothetical protein
EAPIDJML_00737	CDS	2289				hypothetical protein
EAPIDJML_00738	CDS	561				hypothetical protein
EAPIDJML_00739	CDS	1188	fabF_1	2.3.1.179		3-oxoacyl-[acyl-carrier-protein] synthase 2
EAPIDJML_00740	CDS	441				hypothetical protein
EAPIDJML_00741	CDS	720	fabG_1	1.1.1.100		3-oxoacyl-[acyl-carrier-protein] reductase FabG
EAPIDJML_00742	CDS	1227	fabF_2	2.3.1.179		3-oxoacyl-[acyl-carrier-protein] synthase 2
EAPIDJML_00743	CDS	375				hypothetical protein
EAPIDJML_00744	CDS	852	prmC_1	2.1.1.297	COG2890	Release factor glutamine methyltransferase
EAPIDJML_00745	CDS	807				hypothetical protein
EAPIDJML_00746	CDS	390				hypothetical protein
EAPIDJML_00747	CDS	387				hypothetical protein
EAPIDJML_00748	CDS	1803	sdhA	1.3.5.1		Succinate dehydrogenase flavoprotein subunit
EAPIDJML_00749	CDS	783	sdhB	1.3.5.1	COG0479	Succinate dehydrogenase iron-sulfur subunit
EAPIDJML_00750	CDS	849	phzF	5.3.3.17		Trans-2,3-dihydro-3-hydroxyanthranilate isomerase
EAPIDJML_00751	CDS	399				hypothetical protein
EAPIDJML_00752	CDS	2037	recG	3.6.4.12	COG1200	ATP-dependent DNA helicase RecG
EAPIDJML_00753	CDS	981	ispB	2.5.1.90	COG0142	Octaprenyl diphosphate synthase
EAPIDJML_00754	CDS	2793	glnE		COG1391	Bifunctional glutamine synthetase adenylyltransferase/adenylyl-removing enzyme
EAPIDJML_00755	CDS	276				hypothetical protein
EAPIDJML_00756	CDS	1728	poxB	1.2.5.1	COG0028	Pyruvate dehydrogenase [ubiquinone]
EAPIDJML_00757	CDS	1458	trkG		COG0168	Trk system potassium uptake protein TrkG
EAPIDJML_00758	tRNA	76				tRNA-Arg(cct)
EAPIDJML_00759	CDS	1308	glmM	5.4.2.10	COG1109	Phosphoglucosamine mutase
EAPIDJML_00760	CDS	954				hypothetical protein
EAPIDJML_00761	CDS	456	dut	3.6.1.23	COG0756	Deoxyuridine 5'-triphosphate nucleotidohydrolase
EAPIDJML_00762	CDS	1071	leuB	1.1.1.85		3-isopropylmalate dehydrogenase
EAPIDJML_00763	CDS	1110	asd	1.2.1.11	COG0136	Aspartate-semialdehyde dehydrogenase
EAPIDJML_00764	CDS	942	ispH	1.17.7.4	COG0761	4-hydroxy-3-methylbut-2-enyl diphosphate reductase
EAPIDJML_00765	CDS	504	lspA	3.4.23.36		Lipoprotein signal peptidase
EAPIDJML_00766	CDS	2847	ileS	6.1.1.5	COG0060	Isoleucine--tRNA ligase
EAPIDJML_00767	CDS	936	ribF		COG0196	Bifunctional riboflavin kinase/FMN adenylyltransferase
EAPIDJML_00768	CDS	378	rplQ		COG0203	50S ribosomal protein L17
EAPIDJML_00769	CDS	999	rpoA	2.7.7.6		DNA-directed RNA polymerase subunit alpha
EAPIDJML_00770	CDS	624	rpsD		COG0522	30S ribosomal protein S4
EAPIDJML_00771	CDS	390	rpsK		COG0100	30S ribosomal protein S11
EAPIDJML_00772	CDS	357	rpsM		COG0099	30S ribosomal protein S13
EAPIDJML_00773	CDS	1422	secY		COG0201	Protein translocase subunit SecY
EAPIDJML_00774	CDS	435	rplO		COG0200	50S ribosomal protein L15
EAPIDJML_00775	CDS	180	rpmD		COG1841	50S ribosomal protein L30
EAPIDJML_00776	CDS	516	rpsE		COG0098	30S ribosomal protein S5
EAPIDJML_00777	CDS	357	rplR		COG0256	50S ribosomal protein L18
EAPIDJML_00778	CDS	537	rplF		COG0097	50S ribosomal protein L6
EAPIDJML_00779	CDS	396	rpsH		COG0096	30S ribosomal protein S8
EAPIDJML_00780	CDS	306	rpsN		COG0199	30S ribosomal protein S14
EAPIDJML_00781	CDS	540	rplE		COG0094	50S ribosomal protein L5
EAPIDJML_00782	CDS	342				hypothetical protein
EAPIDJML_00783	CDS	369	rplN		COG0093	50S ribosomal protein L14
EAPIDJML_00784	CDS	267	rpsQ		COG0186	30S ribosomal protein S17
EAPIDJML_00785	CDS	207	rpmC		COG0255	50S ribosomal protein L29
EAPIDJML_00786	CDS	414	rplP		COG0197	50S ribosomal protein L16
EAPIDJML_00787	CDS	690	rpsC		COG0092	30S ribosomal protein S3
EAPIDJML_00788	CDS	327	rplV		COG0091	50S ribosomal protein L22
EAPIDJML_00789	CDS	273	rpsS		COG0185	30S ribosomal protein S19
EAPIDJML_00790	CDS	825	rplB		COG0090	50S ribosomal protein L2
EAPIDJML_00791	CDS	303	rplW		COG0089	50S ribosomal protein L23
EAPIDJML_00792	CDS	606	rplD		COG0088	50S ribosomal protein L4
EAPIDJML_00793	CDS	645	rplC		COG0087	50S ribosomal protein L3
EAPIDJML_00794	CDS	312	rpsJ		COG0051	30S ribosomal protein S10
EAPIDJML_00795	CDS	1191	tufA_2		COG0050	Elongation factor Tu
EAPIDJML_00796	CDS	2097	fusA		COG0480	Elongation factor G
EAPIDJML_00797	CDS	471	rpsG		COG0049	30S ribosomal protein S7
EAPIDJML_00798	CDS	375	rpsL		COG0048	30S ribosomal protein S12
EAPIDJML_00799	CDS	780	fdhD		COG1526	Sulfur carrier protein FdhD
EAPIDJML_00800	CDS	1029				hypothetical protein
EAPIDJML_00801	CDS	840				hypothetical protein
EAPIDJML_00802	CDS	204				hypothetical protein
EAPIDJML_00803	CDS	1056	dinB	2.7.7.7	COG0389	DNA polymerase IV
EAPIDJML_00804	CDS	567	slmA			Nucleoid occlusion factor SlmA
EAPIDJML_00805	CDS	1203	bcr			Bicyclomycin resistance protein
EAPIDJML_00806	CDS	528	pitA_2	2.3.1.-	COG1247	L-methionine sulfoximine/L-methionine sulfone acetyltransferase
EAPIDJML_00807	tRNA	90				tRNA-SeC(tca)
EAPIDJML_00808	CDS	1344	selA	2.9.1.1	COG1921	L-seryl-tRNA(Sec) selenium transferase
EAPIDJML_00809	CDS	1794	selB		COG3276	Selenocysteine-specific elongation factor
EAPIDJML_00810	CDS	351	yffB		COG1393	Protein YffB
EAPIDJML_00811	CDS	1218	lysN	2.6.1.39	COG1167	2-aminoadipate transaminase
EAPIDJML_00812	CDS	1353	xanP		COG2233	Xanthine permease XanP
EAPIDJML_00813	tRNA	76				tRNA-Val(tac)
EAPIDJML_00814	tRNA	74				tRNA-Val(tac)
EAPIDJML_00815	CDS	1920	rlhA		COG0826	23S rRNA 5-hydroxycytidine synthase
EAPIDJML_00816	CDS	1305	aroP		COG1113	Aromatic amino acid transport protein AroP
EAPIDJML_00817	CDS	438				hypothetical protein
EAPIDJML_00818	CDS	1068	obg	3.6.5.-		GTPase Obg
EAPIDJML_00819	CDS	261	rpmA		COG0211	50S ribosomal protein L27
EAPIDJML_00820	CDS	315	rplU		COG0261	50S ribosomal protein L21
EAPIDJML_00821	CDS	972	panS		COG0385	Pantothenate precursors transporter PanS
EAPIDJML_00822	CDS	678				hypothetical protein
EAPIDJML_00823	CDS	648				hypothetical protein
EAPIDJML_00824	CDS	603	pnuC_2		COG3201	Nicotinamide riboside transporter PnuC
EAPIDJML_00825	CDS	480				hypothetical protein
EAPIDJML_00826	CDS	480				hypothetical protein
EAPIDJML_00827	CDS	246				hypothetical protein
EAPIDJML_00828	CDS	1107	nrdB	1.17.4.1	COG0208	Ribonucleoside-diphosphate reductase 1 subunit beta
EAPIDJML_00829	CDS	2244	nrdA	1.17.4.1	COG0209	Ribonucleoside-diphosphate reductase 1 subunit alpha
EAPIDJML_00830	CDS	243				hypothetical protein
EAPIDJML_00831	CDS	1479	ywiE	2.7.8.-	COG1502	putative cardiolipin synthase YwiE
EAPIDJML_00832	CDS	519	nadR_2		COG1056	Bifunctional NAD biosynthesis protein NadR
EAPIDJML_00833	CDS	1512	ilvA	4.3.1.19	COG1171	L-threonine dehydratase biosynthetic IlvA
EAPIDJML_00834	CDS	1824		3.6.3.-	COG1132	Putative multidrug export ATP-binding/permease protein
EAPIDJML_00835	CDS	1008	vldW	1.14.11.52		Validamycin A dioxygenase
EAPIDJML_00836	CDS	810	metQ_2		COG1464	putative D-methionine-binding lipoprotein MetQ
EAPIDJML_00837	CDS	660	menH_3	4.2.99.20		2-succinyl-6-hydroxy-2,4-cyclohexadiene-1-carboxylate synthase
EAPIDJML_00838	CDS	180				hypothetical protein
EAPIDJML_00839	CDS	981	gpsA	1.1.1.94	COG0240	Glycerol-3-phosphate dehydrogenase [NAD(P)+]
EAPIDJML_00840	CDS	1182				hypothetical protein
EAPIDJML_00841	CDS	1203	coaBC		COG0452	Coenzyme A biosynthesis bifunctional protein CoaBC
EAPIDJML_00842	CDS	1524	rng	3.1.26.-	COG1530	Ribonuclease G
EAPIDJML_00843	CDS	1176	pgk	2.7.2.3	COG0126	Phosphoglycerate kinase
EAPIDJML_00844	CDS	954	trxB	1.8.1.9	COG0492	Thioredoxin reductase
EAPIDJML_00845	CDS	363				hypothetical protein
EAPIDJML_00846	CDS	651				hypothetical protein
EAPIDJML_00847	CDS	531				hypothetical protein
EAPIDJML_00848	CDS	1233				hypothetical protein
EAPIDJML_00849	CDS	345				hypothetical protein
EAPIDJML_00850	CDS	1098	spuE		COG0687	Spermidine-binding periplasmic protein SpuE
EAPIDJML_00851	CDS	432				Cytochrome c'
EAPIDJML_00852	CDS	1626	ubiB	2.7.-.-	COG0661	putative protein kinase UbiB
EAPIDJML_00853	CDS	750	ubiE	2.1.1.163	COG2226	Ubiquinone/menaquinone biosynthesis C-methyltransferase UbiE
EAPIDJML_00854	CDS	819	aroE	1.1.1.25	COG0169	Shikimate dehydrogenase (NADP(+))
EAPIDJML_00855	CDS	1851	mutL			DNA mismatch repair protein MutL
EAPIDJML_00856	CDS	1047	bamC			Outer membrane protein assembly factor BamC
EAPIDJML_00857	CDS	873	dapA	4.3.3.7	COG0329	4-hydroxy-tetrahydrodipicolinate synthase
EAPIDJML_00858	CDS	768	xthA	3.1.11.2	COG0708	Exodeoxyribonuclease III
EAPIDJML_00859	CDS	1629				hypothetical protein
EAPIDJML_00860	CDS	942	yfdH	2.4.1.-	COG0463	Prophage bactoprenol glucosyl transferase
EAPIDJML_00861	CDS	345	yfdG		COG2246	Prophage bactoprenol-linked glucose translocase
EAPIDJML_00862	CDS	2745	polA	2.7.7.7	COG0258	DNA polymerase I
EAPIDJML_00863	CDS	1290	fepE		COG3765	Ferric enterobactin transport protein FepE
EAPIDJML_00864	CDS	1368	algC	5.4.2.2	COG1109	Phosphomannomutase/phosphoglucomutase
EAPIDJML_00865	CDS	1017	galE	5.1.3.2	COG1087	UDP-glucose 4-epimerase
EAPIDJML_00866	CDS	1626	pgi	5.3.1.9	COG0166	Glucose-6-phosphate isomerase
EAPIDJML_00867	CDS	1170	tuaD	1.1.1.22	COG1004	UDP-glucose 6-dehydrogenase TuaD
EAPIDJML_00868	CDS	879	galU	2.7.7.9	COG1210	UTP--glucose-1-phosphate uridylyltransferase
EAPIDJML_00869	CDS	822	wbbD	2.4.1.303	COG0463	UDP-Gal:alpha-D-GlcNAc-diphosphoundecaprenol beta-1,3-galactosyltransferase
EAPIDJML_00870	CDS	795				hypothetical protein
EAPIDJML_00871	CDS	660				hypothetical protein
EAPIDJML_00872	CDS	897	arnC	2.4.2.53		Undecaprenyl-phosphate 4-deoxy-4-formamido-L-arabinose transferase
EAPIDJML_00873	CDS	1308				hypothetical protein
EAPIDJML_00874	CDS	1239	wzxE		COG2244	Lipid III flippase
EAPIDJML_00875	CDS	1116	fdtB	2.6.1.90		dTDP-3-amino-3,6-dideoxy-alpha-D-galactopyranose transaminase
EAPIDJML_00876	CDS	558				hypothetical protein
EAPIDJML_00877	CDS	396	fdtA	5.3.2.3		TDP-4-oxo-6-deoxy-alpha-D-glucose-3,4-oxoisomerase
EAPIDJML_00878	CDS	888	rffH	2.7.7.24	COG1209	Glucose-1-phosphate thymidylyltransferase 2
EAPIDJML_00879	CDS	1059	rffG	4.2.1.46	COG1088	dTDP-glucose 4,6-dehydratase 2
EAPIDJML_00880	CDS	1296	wecA	2.7.8.40		UDP-N-acetylgalactosamine-undecaprenyl-phosphate N-acetylgalactosaminephosphotransferase
EAPIDJML_00881	CDS	684	ung	3.2.2.27	COG0692	Uracil-DNA glycosylase
EAPIDJML_00882	CDS	432		2.3.1.-		Acetyltransferase
EAPIDJML_00883	CDS	891				hypothetical protein
EAPIDJML_00884	CDS	588				hypothetical protein
EAPIDJML_00885	CDS	942				hypothetical protein
EAPIDJML_00886	CDS	786	mkl		COG1127	putative ribonucleotide transport ATP-binding protein mkl
EAPIDJML_00887	CDS	1119				hypothetical protein
EAPIDJML_00888	CDS	615				hypothetical protein
EAPIDJML_00889	CDS	621				hypothetical protein
EAPIDJML_00890	CDS	498	pgpA	3.1.3.27	COG1267	Phosphatidylglycerophosphatase A
EAPIDJML_00891	CDS	543	orn	3.1.-.-	COG1949	Oligoribonuclease
EAPIDJML_00892	CDS	603		3.2.2.-	COG1611	Putative cytokinin riboside 5'-monophosphate phosphoribohydrolase
EAPIDJML_00893	CDS	1473	ubiD	4.1.1.98	COG0043	3-octaprenyl-4-hydroxybenzoate carboxy-lyase
EAPIDJML_00894	CDS	582	gmhA	5.3.1.28	COG0279	Phosphoheptose isomerase
EAPIDJML_00895	CDS	477				hypothetical protein
EAPIDJML_00896	CDS	1092	mshA	2.4.1.250		D-inositol-3-phosphate glycosyltransferase
EAPIDJML_00897	CDS	1278	hemA	1.2.1.70	COG0373	Glutamyl-tRNA reductase
EAPIDJML_00898	CDS	555	hpt	2.4.2.8		Hypoxanthine-guanine phosphoribosyltransferase
EAPIDJML_00899	CDS	1257	tolB		COG0823	Tol-Pal system protein TolB
EAPIDJML_00900	CDS	522	pal		COG2885	Peptidoglycan-associated lipoprotein
EAPIDJML_00901	CDS	1752	msbA	7.5.2.6	COG1132	Lipid A export ATP-binding/permease protein MsbA
EAPIDJML_00902	CDS	519	ompA			Outer membrane protein A
EAPIDJML_00903	CDS	588		6.3.3.2	COG0212	5-formyltetrahydrofolate cyclo-ligase
EAPIDJML_00904	CDS	690	pyrE_1	2.4.2.10		Orotate phosphoribosyltransferase
EAPIDJML_00905	CDS	975				hypothetical protein
EAPIDJML_00906	CDS	843				hypothetical protein
EAPIDJML_00907	CDS	1413	sbcB	3.1.11.1	COG2925	Exodeoxyribonuclease I
EAPIDJML_00908	CDS	723	lptB	3.6.3.-	COG1137	Lipopolysaccharide export system ATP-binding protein LptB
EAPIDJML_00909	CDS	501	lptA		COG1934	Lipopolysaccharide export system protein LptA
EAPIDJML_00910	CDS	588	lptC			Lipopolysaccharide export system protein LptC
EAPIDJML_00911	CDS	660	rpiA	5.3.1.6		Ribose-5-phosphate isomerase A
EAPIDJML_00912	CDS	486	slyD	5.2.1.8	COG1047	FKBP-type peptidyl-prolyl cis-trans isomerase SlyD
EAPIDJML_00913	CDS	741	minC		COG0850	Septum site-determining protein MinC
EAPIDJML_00914	CDS	810	minD		COG2894	Septum site-determining protein MinD
EAPIDJML_00915	CDS	339	minE			Cell division topological specificity factor
EAPIDJML_00916	CDS	369	hslR		COG1188	Heat shock protein 15
EAPIDJML_00917	CDS	927	xerC_1		COG4973	Tyrosine recombinase XerC
EAPIDJML_00918	CDS	576	ahpC	1.11.1.15	COG0450	Alkyl hydroperoxide reductase C
EAPIDJML_00919	CDS	1614				hypothetical protein
EAPIDJML_00920	CDS	1377	cysS	6.1.1.16	COG0215	Cysteine--tRNA ligase
EAPIDJML_00921	CDS	276				hypothetical protein
EAPIDJML_00922	CDS	396				hypothetical protein
EAPIDJML_00923	CDS	852				hypothetical protein
EAPIDJML_00924	CDS	3189	acrB		COG0841	Multidrug efflux pump subunit AcrB
EAPIDJML_00925	CDS	1194	acrA			Multidrug efflux pump subunit AcrA
EAPIDJML_00926	CDS	444				hypothetical protein
EAPIDJML_00927	CDS	438	uspA2		COG0589	Universal stress protein A
EAPIDJML_00928	CDS	699	ispD	2.7.7.60		2-C-methyl-D-erythritol 4-phosphate cytidylyltransferase
EAPIDJML_00929	CDS	480	ispF	4.6.1.12	COG0245	2-C-methyl-D-erythritol 2,4-cyclodiphosphate synthase
EAPIDJML_00930	CDS	2100	metG	6.1.1.10	COG0073	Methionine--tRNA ligase
EAPIDJML_00931	CDS	231	yccJ			putative protein YccJ
EAPIDJML_00932	CDS	1389	alsT_1		COG1115	Amino-acid carrier protein AlsT
EAPIDJML_00933	CDS	1233				hypothetical protein
EAPIDJML_00934	CDS	252	yedF		COG0425	Putative sulfur carrier protein YedF
EAPIDJML_00935	CDS	1686	tadA_2	3.5.4.33		tRNA-specific adenosine deaminase
EAPIDJML_00936	CDS	1356	bioA	2.6.1.62		Adenosylmethionine-8-amino-7-oxononanoate aminotransferase
EAPIDJML_00937	CDS	681	bioD1	6.3.3.3	COG0132	ATP-dependent dethiobiotin synthetase BioD 1
EAPIDJML_00938	CDS	642	tenA	3.5.99.2	COG0819	Aminopyrimidine aminohydrolase
EAPIDJML_00939	CDS	705			COG0500	putative protein
EAPIDJML_00940	CDS	1392	norG_1		COG1167	HTH-type transcriptional regulator NorG
EAPIDJML_00941	CDS	852	pdxS	4.3.3.6		Pyridoxal 5'-phosphate synthase subunit PdxS
EAPIDJML_00942	CDS	1494	comM		COG0606	Competence protein ComM
EAPIDJML_00943	CDS	477	luxS	4.4.1.21	COG1854	S-ribosylhomocysteine lyase
EAPIDJML_00944	CDS	1563	murJ		COG0728	putative lipid II flippase MurJ
EAPIDJML_00945	CDS	834	bioP		COG0697	Biotin transporter
EAPIDJML_00946	CDS	768	yhhW	1.13.11.24	COG1741	Quercetin 2,3-dioxygenase
EAPIDJML_00947	CDS	645				hypothetical protein
EAPIDJML_00948	CDS	129				hypothetical protein
EAPIDJML_00949	CDS	720	phoU		COG0704	Phosphate-specific transport system accessory protein PhoU
EAPIDJML_00950	CDS	771	pstB	7.3.2.1	COG1117	Phosphate import ATP-binding protein PstB
EAPIDJML_00951	CDS	861	pstA		COG0581	Phosphate transport system permease protein PstA
EAPIDJML_00952	CDS	960	pstC		COG0573	Phosphate transport system permease protein PstC
EAPIDJML_00953	CDS	1032	pstS		COG0226	Phosphate-binding protein PstS
EAPIDJML_00954	CDS	1287	phoR	2.7.13.3		Phosphate regulon sensor protein PhoR
EAPIDJML_00955	CDS	693	phoB		COG0745	Phosphate regulon transcriptional regulatory protein PhoB
EAPIDJML_00956	CDS	561				hypothetical protein
EAPIDJML_00957	CDS	1224	prsE			Type I secretion system membrane fusion protein PrsE
EAPIDJML_00958	CDS	2166	btuD	7.6.2.8		Vitamin B12 import ATP-binding protein BtuD
EAPIDJML_00959	CDS	1395				hypothetical protein
EAPIDJML_00960	tRNA	89				tRNA-Leu(taa)
EAPIDJML_00961	CDS	729				hypothetical protein
EAPIDJML_00962	CDS	723				hypothetical protein
EAPIDJML_00963	CDS	1215	sstT		COG3633	Serine/threonine transporter SstT
EAPIDJML_00964	CDS	423	atpC		COG0355	ATP synthase epsilon chain
EAPIDJML_00965	CDS	1374	atpD	7.1.2.2	COG0055	ATP synthase subunit beta
EAPIDJML_00966	CDS	912	atpG		COG0224	ATP synthase gamma chain
EAPIDJML_00967	CDS	1548	atpA	7.1.2.2		ATP synthase subunit alpha
EAPIDJML_00968	CDS	555	atpH_1		COG0712	ATP synthase subunit delta
EAPIDJML_00969	CDS	471	atpF		COG0711	ATP synthase subunit b
EAPIDJML_00970	CDS	234	atpH_2			ATP synthase subunit c
EAPIDJML_00971	CDS	816	atpB		COG0356	ATP synthase subunit a
EAPIDJML_00972	CDS	348				hypothetical protein
EAPIDJML_00973	CDS	897	parB		COG1475	putative chromosome-partitioning protein ParB
EAPIDJML_00974	CDS	774	parA			Chromosome partitioning protein ParA
EAPIDJML_00975	CDS	630	rsmG	2.1.1.170	COG0357	Ribosomal RNA small subunit methyltransferase G
EAPIDJML_00976	CDS	1182	moeA	2.10.1.1	COG0303	Molybdopterin molybdenumtransferase
EAPIDJML_00977	CDS	600	mobA	2.7.7.77	COG0746	Molybdenum cofactor guanylyltransferase
EAPIDJML_00978	CDS	459	moaE	2.8.1.12	COG0314	Molybdopterin synthase catalytic subunit
EAPIDJML_00979	CDS	249	moaD		COG1977	Molybdopterin synthase sulfur carrier subunit
EAPIDJML_00980	CDS	867	mntB_1			Manganese transport system membrane protein MntB
EAPIDJML_00981	CDS	804	mntB_2		COG1121	Manganese transport system ATP-binding protein MntB
EAPIDJML_00982	CDS	372	patA_1		COG0784	Protein PatA
EAPIDJML_00983	CDS	459	cheW		COG0835	Chemotaxis protein CheW
EAPIDJML_00984	CDS	1461				hypothetical protein
EAPIDJML_00985	CDS	4887	cheB_2	3.5.1.44		Protein-glutamate methylesterase/protein-glutamine glutaminase
EAPIDJML_00986	CDS	339				hypothetical protein
EAPIDJML_00987	CDS	783	ycfH	3.1.-.-	COG0084	putative metal-dependent hydrolase YcfH
EAPIDJML_00988	CDS	1413	hldE		COG2870	Bifunctional protein HldE
EAPIDJML_00989	CDS	1053	recA			Protein RecA
EAPIDJML_00990	CDS	930	rluC	5.4.99.24	COG0564	Ribosomal large subunit pseudouridine synthase C
EAPIDJML_00991	CDS	210				hypothetical protein
EAPIDJML_00992	CDS	933				hypothetical protein
EAPIDJML_00993	CDS	327				hypothetical protein
EAPIDJML_00994	CDS	882	ubiA	2.5.1.39	COG0382	4-hydroxybenzoate octaprenyltransferase
EAPIDJML_00995	CDS	558	cobO	2.5.1.-	COG2096	Cobalamin adenosyltransferase
EAPIDJML_00996	CDS	678				hypothetical protein
EAPIDJML_00997	CDS	324	hvrA			Trans-acting regulatory protein HvrA
EAPIDJML_00998	tRNA	73				tRNA-Met(cat)
EAPIDJML_00999	CDS	831				hypothetical protein
EAPIDJML_01000	CDS	471				hypothetical protein
EAPIDJML_01001	CDS	405				hypothetical protein
EAPIDJML_01002	CDS	303				hypothetical protein
EAPIDJML_01003	CDS	564				hypothetical protein
EAPIDJML_01004	CDS	819				hypothetical protein
EAPIDJML_01005	CDS	219				hypothetical protein
EAPIDJML_01006	CDS	228				hypothetical protein
EAPIDJML_01007	CDS	675	prtR_1		COG2932	HTH-type transcriptional regulator PrtR
EAPIDJML_01008	CDS	912				hypothetical protein
EAPIDJML_01009	CDS	129				hypothetical protein
EAPIDJML_01010	CDS	186				hypothetical protein
EAPIDJML_01011	CDS	591				hypothetical protein
EAPIDJML_01012	CDS	501				Single-stranded DNA-binding protein
EAPIDJML_01013	CDS	576				hypothetical protein
EAPIDJML_01014	CDS	324				hypothetical protein
EAPIDJML_01015	tRNA	91				tRNA-Ser(gct)
EAPIDJML_01016	CDS	1896	htpG		COG0326	Chaperone protein HtpG
EAPIDJML_01017	CDS	642	prtR_2		COG2932	HTH-type transcriptional regulator PrtR
EAPIDJML_01018	CDS	264				hypothetical protein
EAPIDJML_01019	CDS	3477	dnaE	2.7.7.7	COG0587	DNA polymerase III subunit alpha
EAPIDJML_01020	CDS	912	dmlR_2			HTH-type transcriptional regulator DmlR
EAPIDJML_01021	CDS	168				hypothetical protein
EAPIDJML_01022	CDS	822	yeeZ		COG0451	Protein YeeZ
EAPIDJML_01023	CDS	1650	pyrG	6.3.4.2	COG0504	CTP synthase
EAPIDJML_01024	CDS	378				hypothetical protein
EAPIDJML_01025	CDS	471	trmL	2.1.1.207	COG0219	tRNA (cytidine(34)-2'-O)-methyltransferase
EAPIDJML_01026	CDS	297				hypothetical protein
EAPIDJML_01027	CDS	438	pasT		COG2867	Persistence and stress-resistance toxin PasT
EAPIDJML_01028	CDS	1677				hypothetical protein
EAPIDJML_01029	CDS	1194	ackA	2.7.2.1	COG0282	Acetate kinase
EAPIDJML_01030	CDS	546				hypothetical protein
EAPIDJML_01031	CDS	903	yfeA		COG0803	Periplasmic chelated iron-binding protein YfeA
EAPIDJML_01032	CDS	888	mntB_3		COG1121	Manganese transport system ATP-binding protein MntB
EAPIDJML_01033	CDS	852	mntB_4			Manganese transport system membrane protein MntB
EAPIDJML_01034	CDS	852	mntB_5			Manganese transport system membrane protein MntB
EAPIDJML_01035	CDS	1407			COG2239	Magnesium transporter MgtE
EAPIDJML_01036	CDS	660				hypothetical protein
EAPIDJML_01037	CDS	453				hypothetical protein
EAPIDJML_01038	CDS	480	exbD_2		COG0848	Biopolymer transport protein ExbD
EAPIDJML_01039	CDS	732	exbB		COG0811	Biopolymer transport protein ExbB
EAPIDJML_01040	CDS	756				hypothetical protein
EAPIDJML_01041	CDS	2154	cirA_2		COG4771	Colicin I receptor
EAPIDJML_01042	CDS	528	dps	1.16.-.-		DNA protection during starvation protein
EAPIDJML_01043	CDS	339				hypothetical protein
EAPIDJML_01044	CDS	1401				hypothetical protein
EAPIDJML_01045	CDS	600				hypothetical protein
EAPIDJML_01046	CDS	1974	tktA	2.2.1.1	COG0021	Transketolase 1
EAPIDJML_01047	CDS	417				hypothetical protein
EAPIDJML_01048	CDS	2844	secD			Protein translocase subunit SecD
EAPIDJML_01049	CDS	3615				hypothetical protein
EAPIDJML_01050	CDS	1377	pepA_2	3.4.11.10		cytosol aminopeptidase
EAPIDJML_01051	CDS	1233				hypothetical protein
EAPIDJML_01052	CDS	2676	aceE	1.2.4.1	COG2609	Pyruvate dehydrogenase E1 component
EAPIDJML_01053	CDS	1308	aceF	2.3.1.12	COG0508	Dihydrolipoyllysine-residue acetyltransferase component of pyruvate dehydrogenase complex
EAPIDJML_01054	CDS	2049	sthA	1.6.1.1		Soluble pyridine nucleotide transhydrogenase
EAPIDJML_01055	CDS	1650	glnS	6.1.1.18	COG0008	Glutamine--tRNA ligase
EAPIDJML_01056	CDS	729	hisQ		COG4215	Histidine transport system permease protein HisQ
EAPIDJML_01057	CDS	699	hisM		COG4160	Histidine transport system permease protein HisM
EAPIDJML_01058	CDS	591	pgsA	2.7.8.5	COG0558	CDP-diacylglycerol--glycerol-3-phosphate 3-phosphatidyltransferase
EAPIDJML_01059	CDS	1509	iscS	2.8.1.7		Cysteine desulfurase IscS
EAPIDJML_01060	CDS	762	moeB	2.7.7.80	COG0476	Molybdopterin-synthase adenylyltransferase
EAPIDJML_01061	CDS	834	ttcA	2.8.1.-	COG0037	tRNA-cytidine(32) 2-sulfurtransferase
EAPIDJML_01062	CDS	966	ppsC	2.3.1.41		Phthiocerol synthesis polyketide synthase type I PpsC
EAPIDJML_01063	tRNA	77				tRNA-Val(gac)
EAPIDJML_01064	tRNA	77				tRNA-Met(cat)
EAPIDJML_01065	CDS	687				hypothetical protein
EAPIDJML_01066	CDS	525	speG	2.3.1.57	COG1670	Spermidine N(1)-acetyltransferase
EAPIDJML_01067	CDS	1278	ampG		COG0477	Anhydromuropeptide permease
EAPIDJML_01068	CDS	2583	leuS	6.1.1.4		Leucine--tRNA ligase
EAPIDJML_01069	CDS	609	hutZ	1.14.99.58	COG0748	Heme oxygenase HutZ
EAPIDJML_01070	CDS	501	hutX		COG3721	Intracellular heme transport protein HutX
EAPIDJML_01071	CDS	681	trmO	2.1.1.-	COG1720	tRNA (adenine(37)-N6)-methyltransferase
EAPIDJML_01072	CDS	2025	ligA_1	6.5.1.2	COG0272	DNA ligase
EAPIDJML_01073	CDS	105				hypothetical protein
EAPIDJML_01074	CDS	924	zipA			Cell division protein ZipA
EAPIDJML_01075	CDS	930				hypothetical protein
EAPIDJML_01076	CDS	639	ubiX	2.5.1.129	COG0163	Flavin prenyltransferase UbiX
EAPIDJML_01077	CDS	837	hslO		COG1281	33 kDa chaperonin
EAPIDJML_01078	CDS	1560				hypothetical protein
EAPIDJML_01079	CDS	2592	mutS		COG0249	DNA mismatch repair protein MutS
EAPIDJML_01080	CDS	1194	hipO_2	3.5.1.32	COG1473	Hippurate hydrolase
EAPIDJML_01081	CDS	246				hypothetical protein
EAPIDJML_01082	CDS	1353	yeeO		COG0534	putative FMN/FAD exporter YeeO
EAPIDJML_01083	CDS	483				hypothetical protein
EAPIDJML_01084	CDS	2250	pflB	2.3.1.54		Formate acetyltransferase
EAPIDJML_01085	CDS	879	pflA	1.97.1.4	COG1180	Pyruvate formate-lyase 1-activating enzyme
EAPIDJML_01086	CDS	1404	alsT_2		COG1115	Amino-acid carrier protein AlsT
EAPIDJML_01087	CDS	564	yeiP		COG0231	Elongation factor P-like protein
EAPIDJML_01088	CDS	648	can	4.2.1.1	COG0288	Carbonic anhydrase 2
EAPIDJML_01089	CDS	270	fis		COG2901	DNA-binding protein Fis
EAPIDJML_01090	CDS	966	dusB	1.3.1.-	COG0042	tRNA-dihydrouridine synthase B
EAPIDJML_01091	CDS	894	prmA	2.1.1.-	COG2264	Ribosomal protein L11 methyltransferase
EAPIDJML_01092	CDS	240	sdhE		COG2938	FAD assembly factor SdhE
EAPIDJML_01093	CDS	2514				hypothetical protein
EAPIDJML_01094	CDS	1893	mnmG		COG0445	tRNA uridine 5-carboxymethylaminomethyl modification enzyme MnmG
EAPIDJML_01095	CDS	1212				hypothetical protein
EAPIDJML_01096	CDS	1065				hypothetical protein
EAPIDJML_01097	CDS	1410	patA_2	2.3.1.-	COG1696	Peptidoglycan O-acetyltransferase
EAPIDJML_01098	CDS	540	blc		COG3040	Outer membrane lipoprotein Blc
EAPIDJML_01099	CDS	1308	ttuB			Putative tartrate transporter
EAPIDJML_01100	CDS	231	yeeD		COG0425	Putative sulfur carrier protein YeeD
EAPIDJML_01101	CDS	1041				hypothetical protein
EAPIDJML_01102	CDS	336				hypothetical protein
EAPIDJML_01103	CDS	663				hypothetical protein
EAPIDJML_01104	CDS	348				hypothetical protein
EAPIDJML_01105	CDS	1539	actP_2		COG4147	Cation/acetate symporter ActP
EAPIDJML_01106	CDS	165				hypothetical protein
EAPIDJML_01107	CDS	576	ybiX	1.14.11.-		PKHD-type hydroxylase YbiX
EAPIDJML_01108	CDS	1791	rep_1	3.6.4.12		ATP-dependent DNA helicase Rep
EAPIDJML_01109	CDS	645	mtcA2	4.2.1.1	COG0288	Carbonic anhydrase 2
EAPIDJML_01110	CDS	1440	ddc	4.1.1.86	COG0076	L-2,4-diaminobutyrate decarboxylase
EAPIDJML_01111	CDS	1350	dat	2.6.1.76	COG0160	Diaminobutyrate--2-oxoglutarate aminotransferase
EAPIDJML_01112	CDS	1143				hypothetical protein
EAPIDJML_01113	CDS	978				hypothetical protein
EAPIDJML_01114	CDS	1032	xecA1	4.4.1.23		2-hydroxypropyl-CoM lyase
EAPIDJML_01115	CDS	492	rutF	1.5.1.42	COG1853	FMN reductase (NADH) RutF
EAPIDJML_01116	CDS	759				hypothetical protein
EAPIDJML_01117	CDS	360				hypothetical protein
EAPIDJML_01118	CDS	849				hypothetical protein
EAPIDJML_01119	CDS	684	rnhA_1	3.1.26.4		Ribonuclease H
EAPIDJML_01120	CDS	1374	phrB	4.1.99.3	COG0415	Deoxyribodipyrimidine photo-lyase
EAPIDJML_01121	CDS	1023				hypothetical protein
EAPIDJML_01122	CDS	636				hypothetical protein
EAPIDJML_01123	CDS	1254				hypothetical protein
EAPIDJML_01124	CDS	309				hypothetical protein
EAPIDJML_01125	CDS	738				hypothetical protein
EAPIDJML_01126	CDS	744				hypothetical protein
EAPIDJML_01127	CDS	3087	hsdR	3.1.21.3		Type-1 restriction enzyme R protein
EAPIDJML_01128	CDS	447				hypothetical protein
EAPIDJML_01129	CDS	1257				hypothetical protein
EAPIDJML_01130	CDS	1608	prmC_2	2.1.1.297		Release factor glutamine methyltransferase
EAPIDJML_01131	CDS	477				hypothetical protein
EAPIDJML_01132	CDS	759				hypothetical protein
EAPIDJML_01133	CDS	1710				hypothetical protein
EAPIDJML_01134	CDS	231				hypothetical protein
EAPIDJML_01135	CDS	564				hypothetical protein
EAPIDJML_01136	CDS	213				hypothetical protein
EAPIDJML_01137	CDS	792				hypothetical protein
EAPIDJML_01138	CDS	258				hypothetical protein
EAPIDJML_01139	CDS	1080				hypothetical protein
EAPIDJML_01140	CDS	672				hypothetical protein
EAPIDJML_01141	CDS	264				hypothetical protein
EAPIDJML_01142	CDS	3318				hypothetical protein
EAPIDJML_01143	CDS	717				hypothetical protein
EAPIDJML_01144	CDS	708				hypothetical protein
EAPIDJML_01145	CDS	717				hypothetical protein
EAPIDJML_01146	CDS	336				hypothetical protein
EAPIDJML_01147	CDS	321				hypothetical protein
EAPIDJML_01148	CDS	522				hypothetical protein
EAPIDJML_01149	CDS	2931				hypothetical protein
EAPIDJML_01150	CDS	261				hypothetical protein
EAPIDJML_01151	CDS	402				hypothetical protein
EAPIDJML_01152	CDS	444				hypothetical protein
EAPIDJML_01153	CDS	393				hypothetical protein
EAPIDJML_01154	CDS	336				hypothetical protein
EAPIDJML_01155	CDS	351				hypothetical protein
EAPIDJML_01156	CDS	387				hypothetical protein
EAPIDJML_01157	CDS	975				hypothetical protein
EAPIDJML_01158	CDS	759				hypothetical protein
EAPIDJML_01159	CDS	1011				hypothetical protein
EAPIDJML_01160	CDS	1353				hypothetical protein
EAPIDJML_01161	CDS	1290				hypothetical protein
EAPIDJML_01162	CDS	474				hypothetical protein
EAPIDJML_01163	CDS	342				hypothetical protein
EAPIDJML_01164	CDS	255				hypothetical protein
EAPIDJML_01165	CDS	222				hypothetical protein
	repeat_region	3270
EAPIDJML_01166	CDS	603	cas6f	3.1.-.-		CRISPR-associated endonuclease Cas6/Csy4
EAPIDJML_01167	CDS	1065	csy3			CRISPR-associated protein Csy3
EAPIDJML_01168	CDS	945	csy2			CRISPR-associated protein Csy2
EAPIDJML_01169	CDS	1251				hypothetical protein
EAPIDJML_01170	CDS	3399	cas3	3.1.-.-		CRISPR-associated nuclease/helicase Cas3 subtype I-F/YPEST
EAPIDJML_01171	CDS	954	cas1	3.1.-.-		CRISPR-associated endonuclease Cas1
EAPIDJML_01172	CDS	807	yidA	3.1.3.23	COG0561	Sugar phosphatase YidA
EAPIDJML_01173	CDS	816	metQ_3		COG1464	Methionine-binding lipoprotein MetQ
EAPIDJML_01174	CDS	816	metQ_4		COG1464	D-methionine-binding lipoprotein MetQ
EAPIDJML_01175	CDS	1179	ydbM	1.3.99.-		Putative acyl-CoA dehydrogenase YdbM
EAPIDJML_01176	CDS	690				hypothetical protein
EAPIDJML_01177	CDS	1026	metN2	3.6.3.-	COG1135	Methionine import ATP-binding protein MetN 2
EAPIDJML_01178	CDS	414	yqgF	3.1.-.-	COG0816	Putative pre-16S rRNA nuclease
EAPIDJML_01179	CDS	3909	purL	6.3.5.3	COG0046	Phosphoribosylformylglycinamidine synthase
EAPIDJML_01180	CDS	1566				hypothetical protein
EAPIDJML_01181	CDS	1680	bepA_2	3.4.-.-		Beta-barrel assembly-enhancing protease
EAPIDJML_01182	CDS	681	elbB	4.2.1.-	COG3155	Glyoxalase ElbB
EAPIDJML_01183	CDS	1302	hom	1.1.1.3	COG0460	Homoserine dehydrogenase
EAPIDJML_01184	CDS	1743	ilvI_2	2.2.1.6	COG0028	Acetolactate synthase isozyme 3 large subunit
EAPIDJML_01185	CDS	522	ilvH	2.2.1.6	COG0440	Acetolactate synthase isozyme 3 small subunit
EAPIDJML_01186	CDS	1017	ilvC	1.1.1.86	COG0059	Ketol-acid reductoisomerase (NADP(+))
EAPIDJML_01187	CDS	1377	aroH	2.5.1.54	COG3200	Phospho-2-dehydro-3-deoxyheptonate aldolase
EAPIDJML_01188	CDS	957	accA	2.1.3.15	COG0825	Acetyl-coenzyme A carboxylase carboxyl transferase subunit alpha
EAPIDJML_01189	CDS	891				hypothetical protein
EAPIDJML_01190	CDS	1020	glmS_2	2.6.1.16	COG0449	Glutamine--fructose-6-phosphate aminotransferase [isomerizing]
EAPIDJML_01191	CDS	1104	agaAII	3.5.1.-	COG1820	N-acetylgalactosamine-6-phosphate deacetylase
EAPIDJML_01192	CDS	906				hypothetical protein
EAPIDJML_01193	CDS	1122				hypothetical protein
EAPIDJML_01194	CDS	963	fimA		COG0803	Manganese ABC transporter substrate-binding lipoprotein
EAPIDJML_01195	CDS	498	ogt	2.1.1.63	COG0350	Methylated-DNA--protein-cysteine methyltransferase, constitutive
EAPIDJML_01196	CDS	1638	glcA		COG1620	Glycolate permease GlcA
EAPIDJML_01197	CDS	2823				hypothetical protein
EAPIDJML_01198	CDS	1131	lldD	1.1.-.-	COG1304	L-lactate dehydrogenase
EAPIDJML_01199	CDS	1386	dbpA	3.6.4.13	COG0513	ATP-dependent RNA helicase DbpA
EAPIDJML_01200	CDS	543	dsbC		COG1651	Thiol:disulfide interchange protein DsbC
EAPIDJML_01201	CDS	1731	fruA		COG1299	PTS system fructose-specific EIIB'BC component
EAPIDJML_01202	CDS	939	lacC	2.7.1.144	COG1105	Tagatose-6-phosphate kinase
EAPIDJML_01203	CDS	2520				hypothetical protein
EAPIDJML_01204	CDS	2262	yhgF		COG2183	Protein YhgF
EAPIDJML_01205	CDS	1215				hypothetical protein
EAPIDJML_01206	CDS	693	ddpX_1	3.4.13.22		D-alanyl-D-alanine dipeptidase
EAPIDJML_01207	CDS	429				hypothetical protein
EAPIDJML_01208	CDS	1416	norG_2		COG1167	HTH-type transcriptional regulator NorG
EAPIDJML_01209	CDS	636	tesA_1	3.1.2.2	COG2755	Thioesterase 1/protease 1/lysophospholipase L1
EAPIDJML_01210	CDS	777	modE		COG2005	DNA-binding transcriptional dual regulator ModE
EAPIDJML_01211	CDS	498				hypothetical protein
EAPIDJML_01212	CDS	1185				hypothetical protein
EAPIDJML_01213	CDS	276				hypothetical protein
EAPIDJML_01214	CDS	1587	rhlB_1	3.6.4.13		ATP-dependent RNA helicase RhlB
EAPIDJML_01215	CDS	324				Thioredoxin C-2
EAPIDJML_01216	CDS	507	tpx	1.11.1.15	COG2077	Thiol peroxidase
EAPIDJML_01217	CDS	1044	prfB		COG1186	Peptide chain release factor RF2
EAPIDJML_01218	CDS	195				hypothetical protein
EAPIDJML_01219	CDS	198				hypothetical protein
EAPIDJML_01220	CDS	858	rnd	3.1.13.5	COG0349	Ribonuclease D
EAPIDJML_01221	CDS	330	bamE		COG2913	Outer membrane protein assembly factor BamE
EAPIDJML_01222	CDS	396	mgsA	4.2.3.3	COG1803	Methylglyoxal synthase
EAPIDJML_01223	CDS	819	kdsA	2.5.1.55	COG2877	2-dehydro-3-deoxyphosphooctonate aldolase
EAPIDJML_01224	CDS	570	yhdE	3.6.1.9	COG0424	dTTP/UTP pyrophosphatase
EAPIDJML_01225	CDS	858				hypothetical protein
EAPIDJML_01226	CDS	711				hypothetical protein
EAPIDJML_01227	CDS	882	xerD		COG4974	Tyrosine recombinase XerD
EAPIDJML_01228	CDS	660	artM		COG4160	Arginine ABC transporter permease protein ArtM
EAPIDJML_01229	CDS	687	artQ		COG4215	Arginine ABC transporter permease protein ArtQ
EAPIDJML_01230	CDS	738	artJ		COG0834	ABC transporter arginine-binding protein 1
EAPIDJML_01231	CDS	726	artP	3.6.3.-	COG4161	Arginine transport ATP-binding protein ArtP
EAPIDJML_01232	CDS	840				hypothetical protein
EAPIDJML_01233	CDS	414				hypothetical protein
EAPIDJML_01234	CDS	1038	corA_2		COG0598	Magnesium transport protein CorA
EAPIDJML_01235	CDS	327				hypothetical protein
EAPIDJML_01236	CDS	2361	feoB		COG0370	Fe(2+) transporter FeoB
EAPIDJML_01237	CDS	261				hypothetical protein
EAPIDJML_01238	CDS	441				hypothetical protein
EAPIDJML_01239	CDS	816	apaH	3.6.1.41	COG0639	Bis(5'-nucleosyl)-tetraphosphatase, symmetrical
EAPIDJML_01240	CDS	1092				hypothetical protein
EAPIDJML_01241	CDS	534				hypothetical protein
EAPIDJML_01242	CDS	624	rhtC		COG1280	Threonine efflux protein
EAPIDJML_01243	CDS	1062	cobT	2.4.2.21		Nicotinate-nucleotide--dimethylbenzimidazole phosphoribosyltransferase
EAPIDJML_01244	CDS	546		1.6.5.7		2-hydroxy-1,4-benzoquinone reductase
EAPIDJML_01245	CDS	1278		2.5.1.-	COG2873	O-acetyl-L-homoserine sulfhydrylase
EAPIDJML_01246	CDS	1131	hemW		COG0635	Heme chaperone HemW
EAPIDJML_01247	CDS	759	nadE_1	6.3.1.5	COG0171	NH(3)-dependent NAD(+) synthetase
EAPIDJML_01248	CDS	1098				hypothetical protein
EAPIDJML_01249	CDS	411	yqaA		COG1238	Inner membrane protein YqaA
EAPIDJML_01250	CDS	432	mscL		COG1970	Large-conductance mechanosensitive channel
EAPIDJML_01251	CDS	3249	smc_2			Chromosome partition protein Smc
EAPIDJML_01252	CDS	1239	sbcD		COG0420	Nuclease SbcCD subunit D
EAPIDJML_01253	CDS	249				hypothetical protein
EAPIDJML_01254	CDS	1017	dctP		COG1638	C4-dicarboxylate-binding periplasmic protein DctP
EAPIDJML_01255	CDS	666	dctQ		COG3090	C4-dicarboxylate TRAP transporter small permease protein DctQ
EAPIDJML_01256	CDS	1284	dctM		COG1593	C4-dicarboxylate TRAP transporter large permease protein DctM
EAPIDJML_01257	CDS	600	tehB	2.1.1.-		putative S-adenosyl-L-methionine-dependent methyltransferase TehB
EAPIDJML_01258	CDS	1017	ccp	1.11.1.5	COG1858	Cytochrome c551 peroxidase
EAPIDJML_01259	CDS	1272	serS	6.1.1.11	COG0172	Serine--tRNA ligase
EAPIDJML_01260	CDS	252	fdx		COG1145	Ferredoxin
EAPIDJML_01261	CDS	993	erfK	2.-.-.-	COG1376	putative L,D-transpeptidase ErfK/SrfK
EAPIDJML_01262	CDS	1200	tyrS	6.1.1.1	COG0162	Tyrosine--tRNA ligase
EAPIDJML_01263	CDS	324	fdxA		COG1146	Ferredoxin 1
EAPIDJML_01264	CDS	966	rsgA	3.6.1.-	COG1162	Small ribosomal subunit biogenesis GTPase RsgA
EAPIDJML_01265	CDS	1143	potA	7.6.2.11	COG3842	Spermidine/putrescine import ATP-binding protein PotA
EAPIDJML_01266	CDS	1020	potH		COG1176	Putrescine transport system permease protein PotH
EAPIDJML_01267	CDS	807	ydcV			Inner membrane ABC transporter permease protein YdcV
EAPIDJML_01268	CDS	1014				hypothetical protein
EAPIDJML_01269	CDS	318				hypothetical protein
EAPIDJML_01270	CDS	555				hypothetical protein
EAPIDJML_01271	CDS	1080				hypothetical protein
EAPIDJML_01272	CDS	315				hypothetical protein
EAPIDJML_01273	CDS	273		2.8.1.-	COG0607	Sulfurtransferase
EAPIDJML_01274	CDS	438				hypothetical protein
EAPIDJML_01275	CDS	633	rsxB	7.-.-.-		Ion-translocating oxidoreductase complex subunit B
EAPIDJML_01276	CDS	657	nth	4.2.99.18	COG0177	Endonuclease III
EAPIDJML_01277	CDS	657	lipB	2.3.1.181	COG0321	Octanoyltransferase
EAPIDJML_01278	CDS	960	lipA	2.8.1.8	COG0320	Lipoyl synthase
EAPIDJML_01279	CDS	1020	fieF			Ferrous-iron efflux pump FieF
EAPIDJML_01280	CDS	774	yjjV	3.1.-.-	COG0084	putative metal-dependent hydrolase YjjV
EAPIDJML_01281	CDS	1056	IMPDH	1.1.1.205		Inosine-5'-monophosphate dehydrogenase
EAPIDJML_01282	CDS	741				hypothetical protein
EAPIDJML_01283	CDS	702	yccA		COG0670	Modulator of FtsH protease YccA
EAPIDJML_01284	CDS	1617	nadE_2	6.3.5.1	COG0171	Glutamine-dependent NAD(+) synthetase
EAPIDJML_01285	CDS	1665	recN		COG0497	DNA repair protein RecN
EAPIDJML_01286	CDS	684				hypothetical protein
	repeat_region	1529
EAPIDJML_01287	CDS	384				hypothetical protein
EAPIDJML_01288	CDS	1530	guaA_2	6.3.5.2		GMP synthase [glutamine-hydrolyzing]
EAPIDJML_01289	CDS	1152	metC	4.4.1.13	COG0626	Cystathionine beta-lyase MetC
EAPIDJML_01290	CDS	1221	tyrP		COG0814	Tyrosine-specific transport protein
EAPIDJML_01291	CDS	1257	dadA1_1	1.4.99.-	COG0665	D-amino acid dehydrogenase 1
EAPIDJML_01292	CDS	1362				hypothetical protein
EAPIDJML_01293	CDS	900				hypothetical protein
EAPIDJML_01294	CDS	804	trpA	4.2.1.20		Tryptophan synthase alpha chain
EAPIDJML_01295	CDS	1188	trpB	4.2.1.20	COG0133	Tryptophan synthase beta chain
EAPIDJML_01296	CDS	1374	trpC_1		COG0134	Tryptophan biosynthesis protein TrpCF
EAPIDJML_01297	CDS	1008	trpGD		COG0512	Bifunctional protein TrpGD
EAPIDJML_01298	CDS	1221	alaA	2.6.1.2	COG0436	Glutamate-pyruvate aminotransferase AlaA
EAPIDJML_01299	CDS	1455	mleN		COG1757	Malate-2H(+)/Na(+)-lactate antiporter
EAPIDJML_01300	CDS	855				hypothetical protein
EAPIDJML_01301	CDS	936				hypothetical protein
EAPIDJML_01302	CDS	459				hypothetical protein
EAPIDJML_01303	CDS	561				hypothetical protein
EAPIDJML_01304	CDS	498	mraZ			Transcriptional regulator MraZ
EAPIDJML_01305	CDS	849	murI_2	5.1.1.3		Glutamate racemase
EAPIDJML_01306	CDS	2535	pepN	3.4.11.2	COG0308	Aminopeptidase N
EAPIDJML_01307	CDS	546	ydjA	1.-.-.-	COG0778	Putative NAD(P)H nitroreductase YdjA
EAPIDJML_01308	CDS	774	yfcA		COG0730	putative membrane transporter protein YfcA
EAPIDJML_01309	CDS	495				hypothetical protein
EAPIDJML_01310	CDS	1419	plaP		COG0531	Low-affinity putrescine importer PlaP
EAPIDJML_01311	CDS	552	lolB		COG3017	Outer-membrane lipoprotein LolB
EAPIDJML_01312	CDS	825	ispE	2.7.1.148	COG1947	4-diphosphocytidyl-2-C-methyl-D-erythritol kinase
EAPIDJML_01313	CDS	1515	fumB	4.2.1.2	COG1838	Fumarate hydratase class I, anaerobic
EAPIDJML_01314	CDS	1662				hypothetical protein
EAPIDJML_01315	CDS	777	mlaE		COG0767	Intermembrane phospholipid transport system permease protein MlaE
EAPIDJML_01316	CDS	792	mlaF	3.6.3.-	COG1127	Intermembrane phospholipid transport system ATP-binding protein MlaF
EAPIDJML_01317	CDS	1779				hypothetical protein
EAPIDJML_01318	CDS	1506				hypothetical protein
EAPIDJML_01319	CDS	372	walR		COG0745	Transcriptional regulatory protein WalR
EAPIDJML_01320	CDS	516				hypothetical protein
EAPIDJML_01321	tRNA	76				tRNA-Glu(ttc)
EAPIDJML_01322	tRNA	76				tRNA-Ala(ggc)
EAPIDJML_01323	tRNA	76				tRNA-Glu(ttc)
EAPIDJML_01324	tRNA	73				tRNA-Met(cat)
EAPIDJML_01325	CDS	1287				hypothetical protein
EAPIDJML_01326	CDS	1323				hypothetical protein
EAPIDJML_01327	CDS	759				hypothetical protein
EAPIDJML_01328	CDS	1272	aplIM	2.1.1.37	COG0270	Modification methylase AplI
EAPIDJML_01329	CDS	465				hypothetical protein
EAPIDJML_01330	CDS	432				hypothetical protein
EAPIDJML_01331	CDS	297				hypothetical protein
EAPIDJML_01332	CDS	471				hypothetical protein
EAPIDJML_01333	CDS	270				hypothetical protein
EAPIDJML_01334	CDS	495				hypothetical protein
EAPIDJML_01335	CDS	828				hypothetical protein
EAPIDJML_01336	CDS	279				hypothetical protein
EAPIDJML_01337	CDS	252				hypothetical protein
EAPIDJML_01338	CDS	645	lexA	3.4.21.88		LexA repressor
EAPIDJML_01339	CDS	1680	recF_1			DNA replication and repair protein RecF
EAPIDJML_01340	CDS	825				hypothetical protein
EAPIDJML_01341	CDS	204				hypothetical protein
EAPIDJML_01342	CDS	159				hypothetical protein
EAPIDJML_01343	CDS	153				hypothetical protein
EAPIDJML_01344	CDS	147				hypothetical protein
EAPIDJML_01345	CDS	774				hypothetical protein
EAPIDJML_01346	CDS	663				hypothetical protein
EAPIDJML_01347	CDS	204				hypothetical protein
EAPIDJML_01348	CDS	165				hypothetical protein
EAPIDJML_01349	CDS	489	ssb_1		COG0629	Single-stranded DNA-binding protein
EAPIDJML_01350	CDS	633				hypothetical protein
EAPIDJML_01351	CDS	222				hypothetical protein
EAPIDJML_01352	CDS	519				hypothetical protein
EAPIDJML_01353	CDS	1200	intA_1		COG0582	Prophage integrase IntA
EAPIDJML_01354	CDS	552				hypothetical protein
EAPIDJML_01355	CDS	996	xerC_2			Tyrosine recombinase XerC
EAPIDJML_01356	CDS	675				hypothetical protein
EAPIDJML_01357	CDS	774				hypothetical protein
EAPIDJML_01358	CDS	789				hypothetical protein
EAPIDJML_01359	CDS	243				hypothetical protein
EAPIDJML_01360	CDS	120				hypothetical protein
EAPIDJML_01361	CDS	189				hypothetical protein
EAPIDJML_01362	CDS	207				hypothetical protein
EAPIDJML_01363	CDS	2610	dnaG_2	2.7.7.-		DNA primase
EAPIDJML_01364	CDS	321				hypothetical protein
EAPIDJML_01365	CDS	351				hypothetical protein
EAPIDJML_01366	CDS	501	ligA_2	6.5.1.2		DNA ligase
EAPIDJML_01367	CDS	696			COG2932	putative HTH-type transcriptional regulator
EAPIDJML_01368	CDS	231				hypothetical protein
EAPIDJML_01369	CDS	330				hypothetical protein
EAPIDJML_01370	CDS	1104	yejK			Nucleoid-associated protein YejK
EAPIDJML_01371	CDS	1188				hypothetical protein
EAPIDJML_01372	CDS	1047				hypothetical protein
EAPIDJML_01373	CDS	435				hypothetical protein
EAPIDJML_01374	CDS	2184				hypothetical protein
EAPIDJML_01375	CDS	303				hypothetical protein
EAPIDJML_01376	CDS	519				hypothetical protein
EAPIDJML_01377	CDS	1173	gpFI			Putative prophage major tail sheath protein
EAPIDJML_01378	CDS	150				hypothetical protein
EAPIDJML_01379	CDS	366				hypothetical protein
EAPIDJML_01380	CDS	1080				hypothetical protein
EAPIDJML_01381	CDS	582				hypothetical protein
EAPIDJML_01382	CDS	897				hypothetical protein
EAPIDJML_01383	CDS	375				hypothetical protein
EAPIDJML_01384	CDS	633				hypothetical protein
EAPIDJML_01385	CDS	435				hypothetical protein
EAPIDJML_01386	CDS	357				hypothetical protein
EAPIDJML_01387	CDS	363				hypothetical protein
EAPIDJML_01388	CDS	246				hypothetical protein
EAPIDJML_01389	CDS	210				hypothetical protein
EAPIDJML_01390	CDS	492				hypothetical protein
EAPIDJML_01391	CDS	207				hypothetical protein
EAPIDJML_01392	CDS	459				hypothetical protein
EAPIDJML_01393	CDS	660				hypothetical protein
EAPIDJML_01394	CDS	1020				hypothetical protein
EAPIDJML_01395	CDS	822				hypothetical protein
EAPIDJML_01396	CDS	1836				hypothetical protein
EAPIDJML_01397	CDS	960				hypothetical protein
EAPIDJML_01398	tmRNA	354	ssrA			transfer-messenger RNA, SsrA
EAPIDJML_01399	tRNA	76				tRNA-Phe(gaa)
EAPIDJML_01400	tRNA	76				tRNA-Phe(gaa)
EAPIDJML_01401	CDS	1149	yfeW	3.4.16.4	COG1680	Putative D-alanyl-D-alanine carboxypeptidase
EAPIDJML_01402	CDS	1527	lnt	2.3.1.269	COG0815	Apolipoprotein N-acyltransferase
EAPIDJML_01403	CDS	1209	macA		COG0845	Macrolide export protein MacA
EAPIDJML_01404	CDS	1959	macB	3.6.3.-	COG0577	Macrolide export ATP-binding/permease protein MacB
EAPIDJML_01405	CDS	408				hypothetical protein
EAPIDJML_01406	CDS	420				hypothetical protein
EAPIDJML_01407	CDS	1494	mqo	1.1.5.4	COG0579	Malate:quinone oxidoreductase
EAPIDJML_01408	CDS	393				hypothetical protein
EAPIDJML_01409	CDS	570	trpC_2		COG0134	Tryptophan biosynthesis protein TrpCF
EAPIDJML_01410	tRNA	90				tRNA-Ser(tga)
EAPIDJML_01411	CDS	810				hypothetical protein
EAPIDJML_01412	CDS	1149	cfa	2.1.1.79	COG2230	Cyclopropane-fatty-acyl-phospholipid synthase
EAPIDJML_01413	CDS	1437				hypothetical protein
EAPIDJML_01414	CDS	1866				hypothetical protein
EAPIDJML_01415	CDS	1107	yehL		COG0714	putative protein YehL
EAPIDJML_01416	CDS	2313				hypothetical protein
EAPIDJML_01417	CDS	1155				hypothetical protein
EAPIDJML_01418	CDS	312	ssb_2		COG0629	Single-stranded DNA-binding protein
EAPIDJML_01419	CDS	462				hypothetical protein
EAPIDJML_01420	CDS	1053				hypothetical protein
EAPIDJML_01421	CDS	1002	hgdH	1.1.1.399	COG1052	(R)-2-hydroxyglutarate dehydrogenase
EAPIDJML_01422	CDS	285				hypothetical protein
EAPIDJML_01423	CDS	975				hypothetical protein
EAPIDJML_01424	CDS	11439				hypothetical protein
EAPIDJML_01425	CDS	1284	sqr	1.8.5.4	COG0446	Sulfide-quinone reductase
EAPIDJML_01426	CDS	1152	nhaA		COG3004	Na(+)/H(+) antiporter NhaA
EAPIDJML_01427	CDS	855				hypothetical protein
EAPIDJML_01428	CDS	849	sseB	2.8.1.1	COG2897	Putative thiosulfate sulfurtransferase SseB
EAPIDJML_01429	CDS	645	queH	1.17.99.6	COG1636	Epoxyqueuosine reductase QueH
EAPIDJML_01430	CDS	1431	pykA	2.7.1.40	COG0469	Pyruvate kinase II
EAPIDJML_01431	CDS	1377	hemN	1.3.98.3	COG0635	Oxygen-independent coproporphyrinogen III oxidase
EAPIDJML_01432	CDS	798	pdxK	2.7.1.35	COG0351	Pyridoxine kinase
EAPIDJML_01433	CDS	444				hypothetical protein
EAPIDJML_01434	CDS	600	yigZ		COG1739	IMPACT family member YigZ
EAPIDJML_01435	CDS	1083	mraY	2.7.8.13	COG0472	Phospho-N-acetylmuramoyl-pentapeptide-transferase
EAPIDJML_01436	CDS	1350	murF	6.3.2.10	COG0770	UDP-N-acetylmuramoyl-tripeptide--D-alanyl-D-alanine ligase
EAPIDJML_01437	CDS	1485	murE	6.3.2.13	COG0769	UDP-N-acetylmuramoyl-L-alanyl-D-glutamate--2,6-diaminopimelate ligase
EAPIDJML_01438	CDS	1755	ftsI	3.4.16.4	COG0768	Peptidoglycan D,D-transpeptidase FtsI
EAPIDJML_01439	CDS	324	ftsL			Cell division protein FtsL
EAPIDJML_01440	CDS	927	rsmH	2.1.1.199	COG0275	Ribosomal RNA small subunit methyltransferase H
EAPIDJML_01441	CDS	345				hypothetical protein
EAPIDJML_01442	CDS	1245			COG1055	putative transporter
EAPIDJML_01443	CDS	786	ybfF	3.1.-.-	COG0596	Esterase YbfF
EAPIDJML_01444	CDS	492	rutC_1	1.-.-.-		Putative aminoacrylate peracid reductase RutC
EAPIDJML_01445	CDS	576	cetB	5.1.3.33		2-epi-5-epi-valiolone epimerase
EAPIDJML_01446	CDS	861	cyoE	2.5.1.141	COG0109	Protoheme IX farnesyltransferase
EAPIDJML_01447	CDS	327	cyoD		COG3125	Cytochrome bo(3) ubiquinol oxidase subunit 4
EAPIDJML_01448	CDS	609	cyoC		COG1845	Cytochrome bo(3) ubiquinol oxidase subunit 3
EAPIDJML_01449	CDS	2007	cyoB	7.1.1.3	COG0843	Cytochrome bo(3) ubiquinol oxidase subunit 1
EAPIDJML_01450	CDS	906	cyoA		COG1622	Cytochrome bo(3) ubiquinol oxidase subunit 2
EAPIDJML_01451	CDS	399				hypothetical protein
EAPIDJML_01452	CDS	1389			COG5383	putative protein
EAPIDJML_01453	CDS	1260	davT_4	2.6.1.48	COG0160	5-aminovalerate aminotransferase DavT
EAPIDJML_01454	CDS	234	ybcJ		COG2501	putative protein YbcJ
EAPIDJML_01455	tRNA	77				tRNA-Met(cat)
EAPIDJML_01456	CDS	558	ddpX_2	3.4.13.22	COG2173	D-alanyl-D-alanine dipeptidase
EAPIDJML_01457	CDS	273			COG2924	putative Fe(2+)-trafficking protein
EAPIDJML_01458	CDS	951	prs	2.7.6.1	COG0462	Ribose-phosphate pyrophosphokinase
EAPIDJML_01459	tRNA	75				tRNA-Gln(ttg)
EAPIDJML_01460	CDS	792	scpA		COG1354	Segregation and condensation protein A
EAPIDJML_01461	CDS	993	trpS	6.1.1.2	COG0180	Tryptophan--tRNA ligase
EAPIDJML_01462	CDS	669				hypothetical protein
EAPIDJML_01463	CDS	858				hypothetical protein
EAPIDJML_01464	CDS	1080				hypothetical protein
EAPIDJML_01465	CDS	3285				hypothetical protein
EAPIDJML_01466	CDS	759			COG0327	GTP cyclohydrolase 1 type 2
EAPIDJML_01467	CDS	1689				hypothetical protein
EAPIDJML_01468	CDS	2895				hypothetical protein
EAPIDJML_01469	CDS	2805				hypothetical protein
EAPIDJML_01470	CDS	549	hcrC	1.3.7.9		4-hydroxybenzoyl-CoA reductase subunit gamma
EAPIDJML_01471	CDS	1245	nicB	1.17.2.1	COG1529	Nicotinate dehydrogenase subunit B
EAPIDJML_01472	CDS	978	pucA	1.17.1.4	COG1975	putative xanthine dehydrogenase subunit A
EAPIDJML_01473	CDS	588	ttrR		COG4566	Tetrathionate response regulatory protein TtrR
EAPIDJML_01474	CDS	1761	ttrS	2.7.13.3	COG0642	Tetrathionate sensor histidine kinase TtrS
EAPIDJML_01475	CDS	735	ttrB		COG0437	Tetrathionate reductase subunit B
EAPIDJML_01476	CDS	1077	ttrC			Tetrathionate reductase subunit C
EAPIDJML_01477	CDS	3099	ttrA	1.8.-.-	COG0243	Tetrathionate reductase subunit A
EAPIDJML_01478	CDS	201				hypothetical protein
EAPIDJML_01479	CDS	366				hypothetical protein
EAPIDJML_01480	CDS	342	rutC_2	1.-.-.-		Putative aminoacrylate peracid reductase RutC
EAPIDJML_01481	CDS	5235				putative autotransporter
EAPIDJML_01482	CDS	1092	ychF		COG0012	Ribosome-binding ATPase YchF
EAPIDJML_01483	CDS	567	pth	3.1.1.29		Peptidyl-tRNA hydrolase
EAPIDJML_01484	CDS	615	rplY			50S ribosomal protein L25
EAPIDJML_01485	CDS	2244	parC	5.6.2.2	COG0188	DNA topoisomerase 4 subunit A
EAPIDJML_01486	CDS	666	pcm	2.1.1.77		Protein-L-isoaspartate O-methyltransferase
EAPIDJML_01487	CDS	1251	glyA	2.1.2.1	COG0112	Serine hydroxymethyltransferase
EAPIDJML_01488	CDS	285				hypothetical protein
EAPIDJML_01489	CDS	948				hypothetical protein
EAPIDJML_01490	CDS	3219	carB	6.3.5.5	COG0458	Carbamoyl-phosphate synthase large chain
EAPIDJML_01491	CDS	1125	carA	6.3.5.5	COG0505	Carbamoyl-phosphate synthase small chain
EAPIDJML_01492	CDS	771	ygiD	1.13.11.29	COG3384	4,5-DOPA dioxygenase extradiol
EAPIDJML_01493	CDS	1320				hypothetical protein
EAPIDJML_01494	CDS	660	rluA	5.4.99.28	COG0564	Dual-specificity RNA pseudouridine synthase RluA
EAPIDJML_01495	CDS	906	rarD		COG2962	Protein RarD
EAPIDJML_01496	CDS	1635	nhaK		COG0025	Sodium, potassium, lithium and rubidium/H(+) antiporter
EAPIDJML_01497	CDS	891				hypothetical protein
EAPIDJML_01498	CDS	1242	mtr			Tryptophan-specific transport protein
EAPIDJML_01499	CDS	951				hypothetical protein
EAPIDJML_01500	CDS	417				hypothetical protein
EAPIDJML_01501	CDS	471	aroQ	4.2.1.10	COG0757	3-dehydroquinate dehydratase
EAPIDJML_01502	CDS	468	accB		COG0511	Biotin carboxyl carrier protein of acetyl-CoA carboxylase
EAPIDJML_01503	CDS	1347	accC	6.3.4.14	COG0439	Biotin carboxylase
EAPIDJML_01504	CDS	2298	tdhA		COG1629	TonB-dependent heme receptor A
EAPIDJML_01505	CDS	387				hypothetical protein
EAPIDJML_01506	CDS	456	sufU	2.-.-.-	COG0822	Zinc-dependent sulfurtransferase SufU
EAPIDJML_01507	CDS	912	accD	2.1.3.15	COG0777	Acetyl-coenzyme A carboxylase carboxyl transferase subunit beta
EAPIDJML_01508	CDS	1278	folC	6.3.2.12	COG0285	Dihydrofolate synthase/folylpolyglutamate synthase
EAPIDJML_01509	CDS	735	ftsN_1			Cell division protein FtsN
EAPIDJML_01510	CDS	612	cvpA		COG1286	Colicin V production protein
EAPIDJML_01511	CDS	717	ubiG	2.1.1.222	COG2227	Ubiquinone biosynthesis O-methyltransferase
EAPIDJML_01512	CDS	723	yciK	1.-.-.-	COG1028	putative oxidoreductase YciK
EAPIDJML_01513	CDS	1356		3.4.24.-	COG0612	putative zinc protease
EAPIDJML_01514	CDS	1317				hypothetical protein
EAPIDJML_01515	CDS	729	kdgR		COG1414	Transcriptional regulator KdgR
EAPIDJML_01516	CDS	936	hutG	3.5.3.8	COG0010	Formimidoylglutamase
EAPIDJML_01517	CDS	1209	gltS_2		COG0786	Sodium/glutamate symporter
EAPIDJML_01518	CDS	597				hypothetical protein
EAPIDJML_01519	CDS	1299	purA	6.3.4.4	COG0104	Adenylosuccinate synthetase
EAPIDJML_01520	CDS	885	hflC		COG0330	Modulator of FtsH protease HflC
EAPIDJML_01521	CDS	1278	hflK		COG0330	Modulator of FtsH protease HflK
EAPIDJML_01522	CDS	1290	hflX		COG2262	GTPase HflX
EAPIDJML_01523	CDS	267	hfq		COG1923	RNA-binding protein Hfq
EAPIDJML_01524	CDS	1380	radA	3.6.4.-	COG1066	DNA repair protein RadA
EAPIDJML_01525	CDS	1326	mnmE	3.6.-.-	COG0486	tRNA modification GTPase MnmE
EAPIDJML_01526	CDS	1695	yidC		COG0706	Membrane protein insertase YidC
EAPIDJML_01527	CDS	348	rnpA	3.1.26.5	COG0594	Ribonuclease P protein component
EAPIDJML_01528	CDS	135				hypothetical protein
EAPIDJML_01529	CDS	1203	metK	2.5.1.6	COG0192	S-adenosylmethionine synthase
EAPIDJML_01530	CDS	1683	leuA	2.3.3.13	COG0119	2-isopropylmalate synthase
EAPIDJML_01531	CDS	1302	tig	5.2.1.8	COG0544	Trigger factor
EAPIDJML_01532	tRNA	83				tRNA-Leu(tag)
EAPIDJML_01533	CDS	882	folD		COG0190	Bifunctional protein FolD protein
EAPIDJML_01534	CDS	888	rapZ		COG1660	RNase adapter protein RapZ
EAPIDJML_01535	CDS	1293	tilS	6.3.4.19	COG0037	tRNA(Ile)-lysidine synthase
EAPIDJML_01536	CDS	1749	tamA		COG0729	Translocation and assembly module subunit TamA
EAPIDJML_01537	CDS	777	occP			Octopine permease ATP-binding protein P
EAPIDJML_01538	CDS	399				hypothetical protein
EAPIDJML_01539	CDS	1365	dnaA		COG0593	Chromosomal replication initiator protein DnaA
EAPIDJML_01540	CDS	1971	rep_2	3.6.4.12	COG0210	ATP-dependent DNA helicase Rep
EAPIDJML_01541	CDS	975	kdsD	5.3.1.13	COG0517	Arabinose 5-phosphate isomerase KdsD
EAPIDJML_01542	CDS	450	aer		COG0840	Aerotaxis receptor
EAPIDJML_01543	CDS	1530	cat1	2.8.3.-	COG0427	Succinyl-CoA:coenzyme A transferase
EAPIDJML_01544	CDS	1926	uup		COG0488	ABC transporter ATP-binding protein uup
EAPIDJML_01545	CDS	615			COG1309	putative HTH-type transcriptional regulator
EAPIDJML_01546	CDS	1251				hypothetical protein
EAPIDJML_01547	CDS	1086	aroB	4.2.3.4	COG0337	3-dehydroquinate synthase
EAPIDJML_01548	CDS	567	aroK	2.7.1.71	COG0703	Shikimate kinase 1
EAPIDJML_01549	CDS	2094	sctC			Type 3 secretion system secretin
EAPIDJML_01550	CDS	594				hypothetical protein
EAPIDJML_01551	CDS	669				hypothetical protein
EAPIDJML_01552	CDS	564				hypothetical protein
EAPIDJML_01553	CDS	1038				hypothetical protein
EAPIDJML_01554	CDS	1899	parE	5.6.2.2	COG0187	DNA topoisomerase 4 subunit B
EAPIDJML_01555	CDS	891	rdgC		COG2974	Recombination-associated protein RdgC
EAPIDJML_01556	CDS	675	gph	3.1.3.18	COG0546	Phosphoglycolate phosphatase
EAPIDJML_01557	CDS	1341	rlmD	2.1.1.190	COG2265	23S rRNA (uracil(1939)-C(5))-methyltransferase RlmD
EAPIDJML_01558	CDS	624				hypothetical protein
EAPIDJML_01559	CDS	1383	degP	3.4.21.107	COG0265	Periplasmic serine endoprotease DegP
EAPIDJML_01560	CDS	216	rpsU		COG0828	30S ribosomal protein S21
EAPIDJML_01561	CDS	318	ydhR	1.-.-.-		Putative monooxygenase YdhR
EAPIDJML_01562	CDS	1824	typA		COG1217	GTP-binding protein TypA/BipA
EAPIDJML_01563	CDS	1239	chaA		COG0387	Sodium-potassium/proton antiporter ChaA
EAPIDJML_01564	CDS	558	ssb_3			Single-stranded DNA-binding protein
EAPIDJML_01565	CDS	771	ftsN_2			Cell division protein FtsN
EAPIDJML_01566	CDS	1707	argS	6.1.1.19		Arginine--tRNA ligase
EAPIDJML_01567	CDS	657	proQ			RNA chaperone ProQ
EAPIDJML_01568	CDS	984	surA	5.2.1.8	COG0760	Chaperone SurA
EAPIDJML_01569	CDS	810	rsmA	2.1.1.182	COG0030	Ribosomal RNA small subunit methyltransferase A
EAPIDJML_01570	CDS	1470	ppx	3.6.1.11	COG0248	Exopolyphosphatase
EAPIDJML_01571	CDS	2289	ydeP		COG0243	Protein YdeP
EAPIDJML_01572	CDS	2754	valS	6.1.1.9	COG0525	Valine--tRNA ligase
EAPIDJML_01573	CDS	423				hypothetical protein
EAPIDJML_01574	CDS	483	queF	1.7.1.13	COG0780	NADPH-dependent 7-cyano-7-deazaguanine reductase
EAPIDJML_01575	CDS	948				hypothetical protein
EAPIDJML_01576	CDS	357				hypothetical protein
EAPIDJML_01577	CDS	468		1.11.1.15		Peroxiredoxin
EAPIDJML_01578	CDS	447	copY			Transcriptional repressor CopY
EAPIDJML_01579	CDS	213	merP			Mercuric transport protein periplasmic component
EAPIDJML_01580	CDS	2199	copA_2	7.2.2.8		putative copper-importing P-type ATPase A
EAPIDJML_01581	CDS	444	hslJ		COG3187	Heat shock protein HslJ
EAPIDJML_01582	CDS	2088	relA	2.7.6.5	COG0317	GTP pyrophosphokinase
EAPIDJML_01583	CDS	891	tyrC	1.3.1.43		Cyclohexadienyl dehydrogenase
EAPIDJML_01584	CDS	1200	fabV	1.3.1.9		Enoyl-[acyl-carrier-protein] reductase [NADH]
EAPIDJML_01585	CDS	1086	tal	2.2.1.2		Transaldolase
EAPIDJML_01586	CDS	1131				hypothetical protein
EAPIDJML_01587	CDS	1416	ftsY			Signal recognition particle receptor FtsY
EAPIDJML_01588	CDS	1110	selU	2.5.1.-	COG2603	tRNA 2-selenouridine synthase
EAPIDJML_01589	CDS	660				hypothetical protein
EAPIDJML_01590	CDS	888	hldD	5.1.3.20		ADP-L-glycero-D-manno-heptose-6-epimerase
EAPIDJML_01591	tRNA	77				tRNA-Asp(gtc)
EAPIDJML_01592	tRNA	76				tRNA-Asp(gtc)
EAPIDJML_01593	CDS	2004	cirA_3		COG4771	Colicin I receptor
EAPIDJML_01594	CDS	738				hypothetical protein
EAPIDJML_01595	CDS	717	tsaB		COG1214	tRNA threonylcarbamoyladenosine biosynthesis protein TsaB
EAPIDJML_01596	CDS	177				hypothetical protein
EAPIDJML_01597	CDS	1668	ettA		COG0488	Energy-dependent translational throttle protein EttA
EAPIDJML_01598	CDS	1074				hypothetical protein
EAPIDJML_01599	CDS	2727	rbbA_2		COG0842	Ribosome-associated ATPase
EAPIDJML_01600	CDS	1131	yhhJ		COG0842	Inner membrane transport permease YhhJ
EAPIDJML_01601	CDS	480				hypothetical protein
EAPIDJML_01602	CDS	1071	queG	1.17.99.6	COG1600	Epoxyqueuosine reductase
EAPIDJML_01603	CDS	498	coaD	2.7.7.3	COG0669	Phosphopantetheine adenylyltransferase
EAPIDJML_01604	CDS	768				hypothetical protein
EAPIDJML_01605	CDS	315	iscA		COG0316	Iron-binding protein IscA
EAPIDJML_01606	CDS	1782	asnB	6.3.5.4	COG0367	Asparagine synthetase [glutamine-hydrolyzing] 1
EAPIDJML_01607	CDS	1806	uvrC		COG0322	UvrABC system protein C
EAPIDJML_01608	CDS	591	pabA	2.6.1.85	COG0512	Aminodeoxychorismate synthase component 2
EAPIDJML_01609	CDS	1797	menF	5.4.4.2		Isochorismate synthase MenF
EAPIDJML_01610	CDS	459				hypothetical protein
EAPIDJML_01611	CDS	561	mog	2.7.7.75	COG0521	Molybdopterin adenylyltransferase
EAPIDJML_01612	CDS	1446	nuoN	7.1.1.-	COG1007	NADH-quinone oxidoreductase subunit N
EAPIDJML_01613	CDS	1524	nuoM	7.1.1.-	COG1008	NADH-quinone oxidoreductase subunit M
EAPIDJML_01614	CDS	2001	nuoL	7.1.1.-	COG1009	NADH-quinone oxidoreductase subunit L
EAPIDJML_01615	CDS	333	nuoK	7.1.1.-	COG0713	NADH-quinone oxidoreductase subunit K
EAPIDJML_01616	CDS	666	nuoJ	7.1.1.-	COG0839	NADH-quinone oxidoreductase subunit J
EAPIDJML_01617	CDS	492	nuoI	7.1.1.-	COG1143	NADH-quinone oxidoreductase subunit I
EAPIDJML_01618	CDS	1044	nuoH	7.1.1.-	COG1005	NADH-quinone oxidoreductase subunit H
EAPIDJML_01619	CDS	2301	nqo3	7.1.1.-	COG1034	NADH-quinone oxidoreductase chain 3
EAPIDJML_01620	CDS	1284	nuoF	7.1.1.-		NADH-quinone oxidoreductase subunit F
EAPIDJML_01621	CDS	516	nqo2	7.1.1.-	COG1905	NADH-quinone oxidoreductase chain 2
EAPIDJML_01622	CDS	1251	nuoD	7.1.1.-	COG0649	NADH-quinone oxidoreductase subunit D
EAPIDJML_01623	CDS	696	ndhJ	7.1.1.-		NAD(P)H-quinone oxidoreductase subunit J, chloroplastic
EAPIDJML_01624	CDS	486	nuoB	7.1.1.-	COG0377	NADH-quinone oxidoreductase subunit B
EAPIDJML_01625	CDS	354	ndhC	7.1.1.-		NAD(P)H-quinone oxidoreductase subunit 3
EAPIDJML_01626	CDS	1200	hipO_3	3.5.1.32	COG1473	Hippurate hydrolase
EAPIDJML_01627	CDS	450				hypothetical protein
EAPIDJML_01628	CDS	1704	proS	6.1.1.15	COG0442	Proline--tRNA ligase
EAPIDJML_01629	CDS	876	tsf		COG0264	Elongation factor Ts
EAPIDJML_01630	CDS	756	rpsB		COG0052	30S ribosomal protein S2
EAPIDJML_01631	CDS	1059	hemE	4.1.1.37	COG0407	Uroporphyrinogen decarboxylase
EAPIDJML_01632	CDS	459	rppH_3	3.6.1.-		RNA pyrophosphohydrolase
EAPIDJML_01633	CDS	387	phoP		COG0745	Alkaline phosphatase synthesis transcriptional regulatory protein PhoP
EAPIDJML_01634	CDS	1245	argA	2.3.1.1	COG0548	Amino-acid acetyltransferase
EAPIDJML_01635	CDS	567				hypothetical protein
EAPIDJML_01636	CDS	726				hypothetical protein
EAPIDJML_01637	CDS	552		3.1.3.82	COG0241	D-glycero-beta-D-manno-heptose-1,7-bisphosphate 7-phosphatase
EAPIDJML_01638	CDS	2073	glyS	6.1.1.14	COG0751	Glycine--tRNA ligase beta subunit
EAPIDJML_01639	CDS	1416	gltX	6.1.1.17	COG0008	Glutamate--tRNA ligase
EAPIDJML_01640	CDS	744	tatC		COG0805	Sec-independent protein translocase protein TatC
EAPIDJML_01641	CDS	795	ypjD		COG4137	Inner membrane protein YpjD
EAPIDJML_01642	CDS	1356	ffh		COG0541	Signal recognition particle protein
EAPIDJML_01643	CDS	975				hypothetical protein
EAPIDJML_01644	CDS	237				hypothetical protein
EAPIDJML_01645	CDS	363	folB	4.1.2.25	COG1539	Dihydroneopterin aldolase
EAPIDJML_01646	CDS	1077	pheA			Bifunctional chorismate mutase/prephenate dehydratase
EAPIDJML_01647	CDS	360	pleD			Response regulator PleD
EAPIDJML_01648	CDS	1101	dnaN		COG0592	Beta sliding clamp
EAPIDJML_01649	CDS	1092	recF_2		COG1195	DNA replication and repair protein RecF
EAPIDJML_01650	CDS	2409	gyrB	5.6.2.2	COG0187	DNA gyrase subunit B
EAPIDJML_01651	CDS	1296		1.1.99.3		Gluconate 2-dehydrogenase cytochrome c subunit
EAPIDJML_01652	CDS	1899				hypothetical protein
EAPIDJML_01653	CDS	1311	hmp	1.14.12.17		Flavohemoprotein
EAPIDJML_01654	CDS	318			COG4654	Cytochrome c-551
EAPIDJML_01655	CDS	1368	glmU_2			Bifunctional protein GlmU
EAPIDJML_01656	CDS	1005	arcB	2.1.3.3	COG0078	Ornithine carbamoyltransferase, catabolic
EAPIDJML_01657	CDS	636				hypothetical protein
EAPIDJML_01658	CDS	501	ppiB	5.2.1.8	COG0652	Peptidyl-prolyl cis-trans isomerase B
EAPIDJML_01659	CDS	807	lpxH	3.6.1.54	COG2908	UDP-2,3-diacylglucosamine hydrolase
EAPIDJML_01660	CDS	645	nfsB	1.-.-.-	COG0778	Oxygen-insensitive NAD(P)H nitroreductase
EAPIDJML_01661	CDS	651	thiE	2.5.1.3		Thiamine-phosphate synthase
EAPIDJML_01662	CDS	810	thiD	2.7.1.49		Hydroxymethylpyrimidine/phosphomethylpyrimidine kinase
EAPIDJML_01663	CDS	783	thiM	2.7.1.50	COG2145	Hydroxyethylthiazole kinase
EAPIDJML_01664	CDS	708	anr			Transcriptional activator protein Anr
EAPIDJML_01665	CDS	360	ebrA			Multidrug resistance protein EbrA
EAPIDJML_01666	CDS	315	emrE		COG2076	Multidrug transporter EmrE
EAPIDJML_01667	CDS	915				hypothetical protein
EAPIDJML_01668	CDS	675	baeB	3.-.-.-	COG0491	putative polyketide biosynthesis zinc-dependent hydrolase BaeB
EAPIDJML_01669	CDS	1416	tcyP_2		COG1823	L-cystine uptake protein TcyP
EAPIDJML_01670	CDS	1335	cdr	1.8.1.14		Coenzyme A disulfide reductase
EAPIDJML_01671	CDS	4776	yfhM		COG2373	Alpha-2-macroglobulin
EAPIDJML_01672	CDS	1446	cat	1.11.1.6		Catalase
EAPIDJML_01673	CDS	2196	pbpC		COG4953	Penicillin-binding protein 1C
EAPIDJML_01674	CDS	1902				hypothetical protein
EAPIDJML_01675	CDS	528				hypothetical protein
EAPIDJML_01676	CDS	396	xcpT		COG2165	Type II secretion system protein G
EAPIDJML_01677	CDS	1278	aroA	2.5.1.19	COG0128	3-phosphoshikimate 1-carboxyvinyltransferase
EAPIDJML_01678	CDS	963	bioB	2.8.1.6	COG0502	Biotin synthase
EAPIDJML_01679	CDS	696				hypothetical protein
EAPIDJML_01680	CDS	2604	clpB		COG0542	Chaperone protein ClpB
EAPIDJML_01681	CDS	204	cspC			Cold shock-like protein CspC
EAPIDJML_01682	CDS	489	folK	2.7.6.3	COG0801	2-amino-4-hydroxy-6-hydroxymethyldihydropteridine pyrophosphokinase
EAPIDJML_01683	CDS	1266	proP_3			Proline/betaine transporter
EAPIDJML_01684	CDS	693	zinT		COG3443	Metal-binding protein ZinT
EAPIDJML_01685	CDS	744	loiP	3.4.24.-	COG0501	Metalloprotease LoiP
EAPIDJML_01686	CDS	1023	queA	2.4.99.17	COG0809	S-adenosylmethionine:tRNA ribosyltransferase-isomerase
EAPIDJML_01687	CDS	1242	lysA	4.1.1.20	COG0019	Diaminopimelate decarboxylase
EAPIDJML_01688	CDS	120	lppL		COG5567	Lipopeptide
EAPIDJML_01689	CDS	948	ansA	3.5.1.1	COG0252	putative L-asparaginase
EAPIDJML_01690	tRNA	76				tRNA-Lys(ttt)
EAPIDJML_01691	tRNA	75				tRNA-Lys(ttt)
EAPIDJML_01692	CDS	558	epmC	1.14.-.-	COG3101	Elongation factor P hydroxylase
EAPIDJML_01693	CDS	1149	adhB_2	1.1.1.1		Alcohol dehydrogenase 2
EAPIDJML_01694	CDS	753	mltF	4.2.2.-		Membrane-bound lytic murein transglycosylase F
EAPIDJML_01695	CDS	693	trmB	2.1.1.33	COG0220	tRNA (guanine-N(7)-)-methyltransferase
EAPIDJML_01696	CDS	1218	ispG	1.17.7.3	COG0821	4-hydroxy-3-methylbut-2-en-1-yl diphosphate synthase (flavodoxin)
EAPIDJML_01697	CDS	435				hypothetical protein
EAPIDJML_01698	CDS	222				hypothetical protein
EAPIDJML_01699	CDS	3234	recB	3.1.11.5		RecBCD enzyme subunit RecB
EAPIDJML_01700	CDS	1809	recD	3.1.11.5	COG0507	RecBCD enzyme subunit RecD
EAPIDJML_01701	CDS	564				hypothetical protein
EAPIDJML_01702	CDS	612				hypothetical protein
EAPIDJML_01703	CDS	372				hypothetical protein
EAPIDJML_01704	CDS	384	glpE_1	2.8.1.1		Thiosulfate sulfurtransferase GlpE
EAPIDJML_01705	CDS	546	dsbB			Disulfide bond formation protein B
EAPIDJML_01706	CDS	276	ubiK			Ubiquinone biosynthesis accessory factor UbiK
EAPIDJML_01707	CDS	477				hypothetical protein
EAPIDJML_01708	CDS	1329	yhjE			Inner membrane metabolite transport protein YhjE
EAPIDJML_01709	CDS	3972				hypothetical protein
EAPIDJML_01710	CDS	297	hupB		COG0776	DNA-binding protein HU-beta
EAPIDJML_01711	CDS	2481	lon	3.4.21.53		Lon protease
EAPIDJML_01712	CDS	1995	uvrB_2		COG0556	UvrABC system protein B
EAPIDJML_01713	CDS	591	pilE		COG4969	Fimbrial protein
EAPIDJML_01714	CDS	942	holB	2.7.7.7	COG0470	DNA polymerase III subunit delta'
EAPIDJML_01715	CDS	612	tmk	2.7.4.9	COG0125	Thymidylate kinase
EAPIDJML_01716	CDS	1077	mltG	4.2.2.-	COG1559	Endolytic murein transglycosylase
EAPIDJML_01717	CDS	1242	fabF_3	2.3.1.179	COG0304	3-oxoacyl-[acyl-carrier-protein] synthase 2
EAPIDJML_01718	CDS	240	acpP_3			Acyl carrier protein
EAPIDJML_01719	CDS	735	fabG_2	1.1.1.100		3-oxoacyl-[acyl-carrier-protein] reductase FabG
EAPIDJML_01720	CDS	714	zapD		COG4582	Cell division protein ZapD
EAPIDJML_01721	CDS	630	coaE	2.7.1.24	COG0237	Dephospho-CoA kinase
EAPIDJML_01722	CDS	930	outO			Type 4 prepilin-like proteins leader peptide-processing enzyme
EAPIDJML_01723	CDS	1218	epsF		COG1459	Type II secretion system protein F
EAPIDJML_01724	tRNA	85				tRNA-Leu(gag)
EAPIDJML_01725	CDS	348				hypothetical protein
EAPIDJML_01726	CDS	717	tpiA	5.3.1.1	COG0149	Triosephosphate isomerase
EAPIDJML_01727	CDS	1050	mreB		COG1077	Cell shape-determining protein MreB
EAPIDJML_01728	CDS	879	mreC		COG1792	Cell shape-determining protein MreC
EAPIDJML_01729	CDS	483				hypothetical protein
EAPIDJML_01730	CDS	1920	mrdA	3.4.16.4	COG0768	Peptidoglycan D,D-transpeptidase MrdA
EAPIDJML_01731	CDS	1137	mrdB	2.4.1.129	COG0772	Peptidoglycan glycosyltransferase MrdB
EAPIDJML_01732	CDS	1035				Tn3 family transposase TnXax1
EAPIDJML_01733	CDS	843	rlpA	4.2.2.-		Endolytic peptidoglycan transglycosylase RlpA
EAPIDJML_01734	CDS	1161	dacC	3.4.16.4	COG1686	D-alanyl-D-alanine carboxypeptidase DacC
EAPIDJML_01735	CDS	1614	pckA	4.1.1.49	COG1866	Phosphoenolpyruvate carboxykinase (ATP)
EAPIDJML_01736	CDS	1035	rsmC	2.1.1.172		Ribosomal RNA small subunit methyltransferase C
EAPIDJML_01737	CDS	690	rsuA_2	5.4.99.19	COG1187	Ribosomal small subunit pseudouridine synthase A
EAPIDJML_01738	CDS	381	yabJ	3.5.99.10	COG0251	2-iminobutanoate/2-iminopropanoate deaminase
EAPIDJML_01739	CDS	1692				hypothetical protein
EAPIDJML_01740	CDS	963	ybeZ		COG1702	PhoH-like protein
EAPIDJML_01741	CDS	468	ybeY	3.1.-.-	COG0319	Endoribonuclease YbeY
EAPIDJML_01742	CDS	1563	putP		COG0591	Sodium/proline symporter
EAPIDJML_01743	CDS	1008				hypothetical protein
EAPIDJML_01744	CDS	885	htpX	3.4.24.-	COG0501	Protease HtpX
EAPIDJML_01745	CDS	1254				hypothetical protein
EAPIDJML_01746	CDS	852				hypothetical protein
EAPIDJML_01747	CDS	357	rplS		COG0335	50S ribosomal protein L19
EAPIDJML_01748	CDS	618	yciO		COG0009	putative protein YciO
EAPIDJML_01749	CDS	603	nudF	3.6.1.13		ADP-ribose pyrophosphatase
EAPIDJML_01750	CDS	642	pyrE_2	2.4.2.10	COG0461	Orotate phosphoribosyltransferase
EAPIDJML_01751	CDS	657				hypothetical protein
EAPIDJML_01752	CDS	1434	dnaB	3.6.4.12	COG0305	Replicative DNA helicase
EAPIDJML_01753	CDS	552				hypothetical protein
EAPIDJML_01754	CDS	1116	pntAA	7.1.1.1	COG3288	NAD(P) transhydrogenase subunit alpha part 1
EAPIDJML_01755	CDS	282	pntA	7.1.1.1	COG3288	NAD(P) transhydrogenase subunit alpha
EAPIDJML_01756	CDS	1425	pntB	7.1.1.1	COG1282	NAD(P) transhydrogenase subunit beta
EAPIDJML_01757	CDS	792	nadX	1.4.1.21	COG1712	L-aspartate dehydrogenase
EAPIDJML_01758	CDS	1557	rep_3	3.6.4.12		ATP-dependent DNA helicase Rep
EAPIDJML_01759	CDS	369	yfgD		COG1393	putative protein YfgD
EAPIDJML_01760	CDS	399				hypothetical protein
EAPIDJML_01761	CDS	1368	purB	4.3.2.2	COG0015	Adenylosuccinate lyase
EAPIDJML_01762	CDS	1176	ydiK		COG0628	Putative transport protein YdiK
EAPIDJML_01763	CDS	477	greA		COG0782	Transcription elongation factor GreA
EAPIDJML_01764	CDS	426	gloA	4.4.1.5	COG0346	Lactoylglutathione lyase
EAPIDJML_01765	CDS	570	grpE			Protein GrpE
EAPIDJML_01766	CDS	192				hypothetical protein
EAPIDJML_01767	CDS	1590	rhlE	3.6.4.13		ATP-dependent RNA helicase RhlE
EAPIDJML_01768	CDS	297	lapA			Lipopolysaccharide assembly protein A
EAPIDJML_01769	CDS	1152	lapB		COG2956	Lipopolysaccharide assembly protein B
EAPIDJML_01770	CDS	699	pyrF	4.1.1.23	COG0284	Orotidine 5'-phosphate decarboxylase
EAPIDJML_01771	CDS	252	ibaG		COG5007	Acid stress protein IbaG
EAPIDJML_01772	CDS	1278	murA	2.5.1.7	COG0766	UDP-N-acetylglucosamine 1-carboxyvinyltransferase
EAPIDJML_01773	CDS	681	dnaQ	2.7.7.7	COG0847	DNA polymerase III subunit epsilon
EAPIDJML_01774	CDS	456	rnhA_2	3.1.26.4	COG0328	Ribonuclease HI
EAPIDJML_01775	CDS	795	thyA	2.1.1.45	COG0207	Thymidylate synthase
EAPIDJML_01776	CDS	819	lgt	2.5.1.145	COG0682	Phosphatidylglycerol--prolipoprotein diacylglyceryl transferase
EAPIDJML_01777	CDS	675				hypothetical protein
EAPIDJML_01778	CDS	888				hypothetical protein
EAPIDJML_01779	CDS	585				hypothetical protein
EAPIDJML_01780	CDS	1227	serA	1.1.1.95	COG0111	D-3-phosphoglycerate dehydrogenase
EAPIDJML_01781	CDS	1401	thrC	4.2.3.1	COG0498	Threonine synthase
EAPIDJML_01782	CDS	762				hypothetical protein
EAPIDJML_01783	CDS	1290	gluD	1.4.1.2		NAD-specific glutamate dehydrogenase
EAPIDJML_01784	CDS	1410	hsrA			putative transport protein HsrA
EAPIDJML_01785	tRNA	77				tRNA-Pro(tgg)
EAPIDJML_01786	tRNA	76				tRNA-His(gtg)
EAPIDJML_01787	tRNA	77				tRNA-Arg(tct)
EAPIDJML_01788	tRNA	77				tRNA-Pro(tgg)
EAPIDJML_01789	CDS	1140	cca		COG0617	Multifunctional CCA protein
EAPIDJML_01790	CDS	978	gshB_2	6.3.2.3		Glutathione synthetase
EAPIDJML_01791	CDS	1575				hypothetical protein
EAPIDJML_01792	CDS	558				hypothetical protein
EAPIDJML_01793	CDS	597	ruvA	3.6.4.12	COG0632	Holliday junction ATP-dependent DNA helicase RuvA
EAPIDJML_01794	CDS	483	ruvC	3.1.22.4	COG0817	Crossover junction endodeoxyribonuclease RuvC
EAPIDJML_01795	CDS	747	pmpR		COG0217	Transcriptional regulatory protein PmpR
EAPIDJML_01796	CDS	1317	pepQ	3.4.13.9	COG0006	Xaa-Pro dipeptidase
EAPIDJML_01797	CDS	3336				hypothetical protein
EAPIDJML_01798	CDS	810				hypothetical protein
EAPIDJML_01799	CDS	840	rbn	3.1.-.-	COG1234	Ribonuclease BN
EAPIDJML_01800	CDS	699	trmD	2.1.1.228	COG0336	tRNA (guanine-N(1)-)-methyltransferase
EAPIDJML_01801	CDS	513	rimM		COG0806	Ribosome maturation factor RimM
EAPIDJML_01802	CDS	252	rpsP		COG0228	30S ribosomal protein S16
EAPIDJML_01803	CDS	927	lpxC	3.5.1.108	COG0774	UDP-3-O-acyl-N-acetylglucosamine deacetylase
EAPIDJML_01804	CDS	1125	ftsZ		COG0206	Cell division protein FtsZ
EAPIDJML_01805	CDS	1260	ftsA		COG0849	Cell division protein FtsA
EAPIDJML_01806	CDS	828	ftsQ			Cell division protein FtsQ
EAPIDJML_01807	CDS	924	ddl	6.3.2.4		D-alanine--D-alanine ligase
EAPIDJML_01808	CDS	1428	murC	6.3.2.8	COG0773	UDP-N-acetylmuramate--L-alanine ligase
EAPIDJML_01809	CDS	1074	murG	2.4.1.227	COG0707	UDP-N-acetylglucosamine--N-acetylmuramyl-(pentapeptide) pyrophosphoryl-undecaprenol N-acetylglucosamine transferase
EAPIDJML_01810	CDS	1188	ftsW	2.4.1.129	COG0772	putative peptidoglycan glycosyltransferase FtsW
EAPIDJML_01811	CDS	1377	murD	6.3.2.9	COG0771	UDP-N-acetylmuramoylalanine--D-glutamate ligase
EAPIDJML_01812	CDS	450				hypothetical protein
EAPIDJML_01813	CDS	342	hpf		COG1544	Ribosome hibernation promoting factor
EAPIDJML_01814	CDS	921	yfeX	1.11.1.-	COG2837	Dye-decolorizing peroxidase YfeX
EAPIDJML_01815	CDS	549	vibB	3.3.2.1	COG1535	Vibriobactin-specific isochorismatase
EAPIDJML_01816	CDS	522	pagL	3.1.1.77		Lipid A deacylase PagL
EAPIDJML_01817	CDS	1113	dhaD	1.1.1.6		Glycerol dehydrogenase
EAPIDJML_01818	CDS	1158	yqhD	1.1.1.-	COG1979	Alcohol dehydrogenase YqhD
EAPIDJML_01819	CDS	1842				hypothetical protein
EAPIDJML_01820	CDS	504	ubiC	4.1.3.40		Chorismate pyruvate-lyase
EAPIDJML_01821	CDS	1035				hypothetical protein
EAPIDJML_01822	CDS	2286	btuB_2			Vitamin B12 transporter BtuB
EAPIDJML_01823	CDS	588				hypothetical protein
EAPIDJML_01824	CDS	459				hypothetical protein
EAPIDJML_01825	CDS	966				hypothetical protein
EAPIDJML_01826	CDS	1272	ltxD_2			Leukotoxin export protein LtxD
EAPIDJML_01827	CDS	657				hypothetical protein
EAPIDJML_01828	CDS	2082				hypothetical protein
EAPIDJML_01829	CDS	1737	tmcA	2.3.1.193	COG1444	tRNA(Met) cytidine acetyltransferase TmcA
EAPIDJML_01830	tRNA	76				tRNA-Thr(tgt)
EAPIDJML_01831	CDS	822				hypothetical protein
EAPIDJML_01832	CDS	612	rdgB	3.6.1.66	COG0127	dITP/XTP pyrophosphatase
EAPIDJML_01833	CDS	765	argT		COG0834	Lysine/arginine/ornithine-binding periplasmic protein
EAPIDJML_01834	CDS	312				hypothetical protein
EAPIDJML_01835	CDS	384				hypothetical protein
EAPIDJML_01836	CDS	1209				hypothetical protein
EAPIDJML_01837	tRNA	77				tRNA-Met(cat)
EAPIDJML_01838	CDS	513	rimP			Ribosome maturation factor RimP
EAPIDJML_01839	CDS	1491	nusA		COG0195	Transcription termination/antitermination protein NusA
EAPIDJML_01840	CDS	2694	infB			Translation initiation factor IF-2
EAPIDJML_01841	CDS	378	rbfA		COG0858	Ribosome-binding factor A
EAPIDJML_01842	CDS	939	truB	5.4.99.25	COG0130	tRNA pseudouridine synthase B
EAPIDJML_01843	CDS	294				hypothetical protein
EAPIDJML_01844	CDS	387				hypothetical protein
EAPIDJML_01845	CDS	1287	eno	4.2.1.11		Enolase
EAPIDJML_01846	CDS	1020	pyrB	2.1.3.2	COG0540	Aspartate carbamoyltransferase catalytic subunit
EAPIDJML_01847	CDS	1278	gltA	2.3.3.16	COG0372	Citrate synthase
EAPIDJML_01848	CDS	243	rpmE2		COG0254	50S ribosomal protein L31 type B
EAPIDJML_01849	CDS	1257	rho	3.6.4.-	COG1158	Transcription termination factor Rho
EAPIDJML_01850	CDS	672	dedA		COG0586	Protein DedA
EAPIDJML_01851	CDS	684	lolD_1	3.6.3.-	COG1136	Lipoprotein-releasing system ATP-binding protein LolD
EAPIDJML_01852	CDS	1254	lolC_1		COG4591	Lipoprotein-releasing system transmembrane protein LolC
EAPIDJML_01853	CDS	1266	lolC_2		COG4591	Lipoprotein-releasing system transmembrane protein LolC
EAPIDJML_01854	CDS	579	scpB		COG1386	Segregation and condensation protein B
EAPIDJML_01855	CDS	1032	holA	2.7.7.7	COG1466	DNA polymerase III subunit delta
EAPIDJML_01856	CDS	468	secB		COG1952	Protein-export protein SecB
EAPIDJML_01857	CDS	252	grxC		COG0695	Glutaredoxin 3
EAPIDJML_01858	CDS	432	glpE_2	2.8.1.1		Thiosulfate sulfurtransferase GlpE
EAPIDJML_01859	CDS	2964				hypothetical protein
EAPIDJML_01860	CDS	690				hypothetical protein
EAPIDJML_01861	CDS	723	pagN		COG3637	Outer membrane protein PagN
EAPIDJML_01862	CDS	852	cntI			Pseudopaline exporter CntI
EAPIDJML_01863	CDS	942	yhbE		COG0697	putative inner membrane transporter YhbE
EAPIDJML_01864	CDS	1218	sufS	2.8.1.7	COG0520	Cysteine desulfurase
EAPIDJML_01865	CDS	1092				hypothetical protein
EAPIDJML_01866	CDS	768	sufC		COG0396	putative ATP-dependent transporter SufC
EAPIDJML_01867	CDS	1449	sufB		COG0719	FeS cluster assembly protein SufB
EAPIDJML_01868	CDS	453	cymR_2			HTH-type transcriptional regulator CymR
EAPIDJML_01869	CDS	573	yagU_2		COG3477	Inner membrane protein YagU
EAPIDJML_01870	CDS	2202	rlmL		COG0116	Ribosomal RNA large subunit methyltransferase K/L
EAPIDJML_01871	CDS	3369	mfd	3.6.4.-	COG1197	Transcription-repair-coupling factor
EAPIDJML_01872	CDS	843				hypothetical protein
EAPIDJML_01873	CDS	1077	fbaA	4.1.2.13	COG0191	Fructose-bisphosphate aldolase class 2
EAPIDJML_01874	CDS	732	rlmB	2.1.1.185	COG0566	23S rRNA (guanosine-2'-O-)-methyltransferase RlmB
EAPIDJML_01875	CDS	261				hypothetical protein
EAPIDJML_01876	CDS	933	ghrA	1.1.1.79	COG0111	Glyoxylate/hydroxypyruvate reductase A
EAPIDJML_01877	CDS	3294				hypothetical protein
EAPIDJML_01878	CDS	951	epmA	6.3.1.-	COG2269	Elongation factor P--(R)-beta-lysine ligase
EAPIDJML_01879	CDS	750	ydfG	1.1.1.381	COG4221	NADP-dependent 3-hydroxy acid dehydrogenase YdfG
EAPIDJML_01880	CDS	1068	alr	5.1.1.1	COG0787	Alanine racemase, biosynthetic
EAPIDJML_01881	CDS	675	ygfZ			tRNA-modifying protein YgfZ
EAPIDJML_01882	CDS	1029	pfp	2.7.1.90		Pyrophosphate--fructose 6-phosphate 1-phosphotransferase
EAPIDJML_01883	tRNA	75				tRNA-Glu(ttc)
EAPIDJML_01884	CDS	432	dksA		COG1734	RNA polymerase-binding transcription factor DksA
EAPIDJML_01885	CDS	303				hypothetical protein
EAPIDJML_01886	CDS	1038	pyrC	3.5.2.3	COG0418	Dihydroorotase
EAPIDJML_01887	CDS	522				hypothetical protein
EAPIDJML_01888	CDS	723				hypothetical protein
EAPIDJML_01889	CDS	759	fepC		COG1120	Ferric enterobactin transport ATP-binding protein FepC
EAPIDJML_01890	CDS	972	hmuU_2		COG0609	Hemin transport system permease protein HmuU
EAPIDJML_01891	CDS	1911	cirA_4		COG4771	Colicin I receptor
EAPIDJML_01892	CDS	858	btuF_3			Vitamin B12-binding protein
EAPIDJML_01893	CDS	366				hypothetical protein
EAPIDJML_01894	CDS	1983				hypothetical protein
EAPIDJML_01895	CDS	468				hypothetical protein
EAPIDJML_01896	CDS	1011				hypothetical protein
EAPIDJML_01897	CDS	633	plsC	2.3.1.-	COG0204	1-acyl-sn-glycerol-3-phosphate acyltransferase
EAPIDJML_01898	CDS	939				hypothetical protein
EAPIDJML_01899	CDS	624				hypothetical protein
EAPIDJML_01900	CDS	594	ynbA		COG0558	Inner membrane protein YnbA
EAPIDJML_01901	CDS	831	metQ_5		COG1464	D-methionine-binding lipoprotein MetQ
EAPIDJML_01902	CDS	843	metQ_6		COG1464	D-methionine-binding lipoprotein MetQ
EAPIDJML_01903	CDS	1047				hypothetical protein
EAPIDJML_01904	CDS	936				hypothetical protein
EAPIDJML_01905	CDS	792		1.1.1.390		Sulfoquinovose 1-dehydrogenase
EAPIDJML_01906	CDS	831		3.1.1.99		6-deoxy-6-sulfogluconolactonase
EAPIDJML_01907	CDS	894	hisG	2.4.2.17	COG0040	ATP phosphoribosyltransferase
EAPIDJML_01908	CDS	1296	hisD	1.1.1.23	COG0141	Histidinol dehydrogenase
EAPIDJML_01909	CDS	1041	hisC	2.6.1.9	COG0079	Histidinol-phosphate aminotransferase
EAPIDJML_01910	CDS	1089	hisB		COG0131	Histidine biosynthesis bifunctional protein HisB
EAPIDJML_01911	CDS	735	hisA	5.3.1.16	COG0106	1-(5-phosphoribosyl)-5-[(5-phosphoribosylamino)methylideneamino] imidazole-4-carboxamide isomerase
EAPIDJML_01912	CDS	1365	hisF	4.3.2.10		Imidazole glycerol phosphate synthase subunit HisF
EAPIDJML_01913	CDS	543				hypothetical protein
EAPIDJML_01914	CDS	543	gchK	2.7.13.3	COG0642	Globin-coupled histidine kinase
EAPIDJML_01915	CDS	1557	rhlB_2	3.6.4.13		ATP-dependent RNA helicase RhlB
EAPIDJML_01916	CDS	348	mliC			Membrane-bound lysozyme inhibitor of C-type lysozyme
EAPIDJML_01917	CDS	1497	proP_4			Proline/betaine transporter
EAPIDJML_01918	CDS	819	mutM	3.2.2.23	COG0266	Formamidopyrimidine-DNA glycosylase
EAPIDJML_01919	CDS	375				hypothetical protein
EAPIDJML_01920	CDS	1077				hypothetical protein
EAPIDJML_01921	CDS	1410	sacA	3.2.1.26		Sucrose-6-phosphate hydrolase
EAPIDJML_01922	CDS	690	mtnN	3.2.2.9	COG0775	5'-methylthioadenosine/S-adenosylhomocysteine nucleosidase
EAPIDJML_01923	CDS	1512	lysS	6.1.1.6	COG1190	Lysine--tRNA ligase
EAPIDJML_01924	CDS	1458	guaB	1.1.1.205	COG0516	Inosine-5'-monophosphate dehydrogenase
EAPIDJML_01925	CDS	1707	recJ	3.1.-.-	COG0608	Single-stranded-DNA-specific exonuclease RecJ
EAPIDJML_01926	CDS	999				hypothetical protein
EAPIDJML_01927	CDS	225	tusA		COG0425	Sulfur carrier protein TusA
EAPIDJML_01928	CDS	447	rimI	2.3.1.266	COG0456	[Ribosomal protein S18]-alanine N-acetyltransferase
EAPIDJML_01929	CDS	828				hypothetical protein
EAPIDJML_01930	CDS	837				hypothetical protein
EAPIDJML_01931	CDS	1500	trpE	4.1.3.27	COG0147	Anthranilate synthase component 1
EAPIDJML_01932	CDS	3399	recC	3.1.11.5	COG1330	RecBCD enzyme subunit RecC
EAPIDJML_01933	CDS	480	yfkJ	3.1.3.48	COG0394	Low molecular weight protein-tyrosine-phosphatase YfkJ
EAPIDJML_01934	CDS	603				hypothetical protein
EAPIDJML_01935	tRNA	74				tRNA-Asp(gtc)
EAPIDJML_01936	CDS	153				hypothetical protein
EAPIDJML_01937	CDS	933				hypothetical protein
EAPIDJML_01938	CDS	1590	prfC		COG4108	Peptide chain release factor 3
EAPIDJML_01939	CDS	732				hypothetical protein
EAPIDJML_01940	CDS	1866				hypothetical protein
EAPIDJML_01941	CDS	927	tsdA_2	1.8.2.2	COG3258	Thiosulfate dehydrogenase
EAPIDJML_01942	CDS	651				hypothetical protein
EAPIDJML_01943	CDS	2496				hypothetical protein
EAPIDJML_01944	CDS	687	lolD_2	3.6.3.-	COG1136	Lipoprotein-releasing system ATP-binding protein LolD
EAPIDJML_01945	CDS	615	tesA_2	3.1.1.1	COG2755	Esterase TesA
EAPIDJML_01946	CDS	1617				hypothetical protein
EAPIDJML_01947	CDS	1518	speE	2.5.1.16		Polyamine aminopropyltransferase
EAPIDJML_01948	CDS	399				hypothetical protein
EAPIDJML_01949	CDS	1005				hypothetical protein
EAPIDJML_01950	CDS	1542				hypothetical protein
EAPIDJML_01951	CDS	138				hypothetical protein
EAPIDJML_01952	CDS	360	speH	4.1.1.50	COG1586	S-adenosylmethionine decarboxylase proenzyme
EAPIDJML_01953	CDS	1227	pcnB	2.7.7.19	COG0617	Poly(A) polymerase I
EAPIDJML_01954	CDS	393	rpsI		COG0103	30S ribosomal protein S9
EAPIDJML_01955	CDS	429	rplM		COG0102	50S ribosomal protein L13
EAPIDJML_01956	CDS	1671	glpD	1.1.5.3		Aerobic glycerol-3-phosphate dehydrogenase
EAPIDJML_01957	CDS	1500	glpK	2.7.1.30	COG0554	Glycerol kinase
EAPIDJML_01958	CDS	831	glpF		COG0580	Glycerol uptake facilitator protein
EAPIDJML_01959	CDS	834	aes	3.1.1.-		Acetyl esterase
EAPIDJML_01960	CDS	393				hypothetical protein
EAPIDJML_01961	CDS	849	ligA_3	6.5.1.1		DNA ligase
EAPIDJML_01962	CDS	1368	mepA_3			Multidrug export protein MepA
EAPIDJML_01963	CDS	1407	pykF	2.7.1.40	COG0469	Pyruvate kinase I
EAPIDJML_01964	CDS	414	mutT	3.6.1.55	COG0494	8-oxo-dGTP diphosphatase
EAPIDJML_01965	CDS	1179	cinA			Putative competence-damage inducible protein
EAPIDJML_01966	CDS	1392	zraR		COG2204	Transcriptional regulatory protein ZraR
EAPIDJML_01967	CDS	1560	rcsC_2	2.7.13.3		Sensor histidine kinase RcsC
EAPIDJML_01968	CDS	483				hypothetical protein
EAPIDJML_01969	CDS	1896	slt	4.2.2.-	COG0741	Soluble lytic murein transglycosylase
EAPIDJML_01970	CDS	636	upp	2.4.2.9	COG0035	Uracil phosphoribosyltransferase
EAPIDJML_01971	CDS	333	grxD		COG0278	Glutaredoxin 4
EAPIDJML_01972	CDS	1272	proA	1.2.1.41		Gamma-glutamyl phosphate reductase
EAPIDJML_01973	CDS	396				hypothetical protein
EAPIDJML_01974	CDS	411				putative protein/HI_1462.1
EAPIDJML_01975	CDS	486	greB		COG0782	Transcription elongation factor GreB
EAPIDJML_01976	CDS	891	hdfR			HTH-type transcriptional regulator HdfR
EAPIDJML_01977	CDS	1239	dadA1_2	1.4.99.-	COG0665	D-amino acid dehydrogenase 1
EAPIDJML_01978	CDS	495				hypothetical protein
EAPIDJML_01979	CDS	1299	guaD	3.5.4.3	COG0402	Guanine deaminase
EAPIDJML_01980	CDS	1377	gadA	4.1.1.15	COG0076	Glutamate decarboxylase
EAPIDJML_01981	CDS	1440	gadC_2		COG0531	Glutamate/gamma-aminobutyrate antiporter
EAPIDJML_01982	CDS	4935				hypothetical protein
EAPIDJML_01983	CDS	357	intA_2		COG0582	Prophage integrase IntA
EAPIDJML_01984	CDS	315				hypothetical protein
EAPIDJML_01985	CDS	399				hypothetical protein
EAPIDJML_01986	CDS	1224				hypothetical protein
EAPIDJML_01987	CDS	810	clpP_2	3.4.21.92		ATP-dependent Clp protease proteolytic subunit
EAPIDJML_01988	CDS	1230				hypothetical protein
EAPIDJML_01989	CDS	1680				hypothetical protein
EAPIDJML_01990	CDS	453				hypothetical protein
EAPIDJML_01991	CDS	114				hypothetical protein
EAPIDJML_01992	CDS	330				hypothetical protein
EAPIDJML_01993	CDS	303				hypothetical protein
EAPIDJML_01994	CDS	255				hypothetical protein
EAPIDJML_01995	CDS	222				hypothetical protein
EAPIDJML_01996	CDS	222				hypothetical protein
EAPIDJML_01997	CDS	261				hypothetical protein
[truncated: 22 more rows]

## Sheet: DSM 100375
locus_tag	ftype	length_bp	gene	EC_number	COG	product
KJINAMHN_00001	CDS	4122				hypothetical protein
KJINAMHN_00002	CDS	189				hypothetical protein
KJINAMHN_00003	CDS	897	gabD_1	1.2.1.79	COG1012	Succinate-semialdehyde dehydrogenase [NADP(+)]
KJINAMHN_00004	CDS	750	menH_1	4.2.99.20		2-succinyl-6-hydroxy-2,4-cyclohexadiene-1-carboxylate synthase
KJINAMHN_00005	CDS	138				hypothetical protein
KJINAMHN_00006	CDS	894				hypothetical protein
KJINAMHN_00007	CDS	933				hypothetical protein
KJINAMHN_00008	CDS	1017	nadA	2.5.1.72	COG0379	Quinolinate synthase A
KJINAMHN_00009	CDS	855	nadC_1	2.4.2.19	COG0157	putative nicotinate-nucleotide pyrophosphorylase [carboxylating]
KJINAMHN_00010	CDS	825	sdhL	1.1.1.25	COG0169	Shikimate dehydrogenase-like protein
KJINAMHN_00011	CDS	1419	fdhC_1			Fructose dehydrogenase cytochrome subunit
KJINAMHN_00012	CDS	1653	fdhL	1.1.99.11		Fructose dehydrogenase large subunit
KJINAMHN_00013	CDS	519	fdhS			Fructose dehydrogenase small subunit
KJINAMHN_00014	CDS	903	yijE			putative cystine transporter YijE
KJINAMHN_00015	CDS	855	cvfB		COG2996	Conserved virulence factor B
KJINAMHN_00016	CDS	1116	ydhC			Inner membrane transport protein YdhC
KJINAMHN_00017	CDS	798	viuB		COG2375	Vibriobactin utilization protein ViuB
KJINAMHN_00018	CDS	759	nimR_1			HTH-type transcriptional regulator NimR
KJINAMHN_00019	CDS	2688	acnA	4.2.1.3	COG1048	Aconitate hydratase A
KJINAMHN_00020	CDS	522	ahpD	1.11.1.15	COG2128	Alkyl hydroperoxide reductase AhpD
KJINAMHN_00021	CDS	2061	yccS_1		COG1289	Inner membrane protein YccS
KJINAMHN_00022	CDS	1794	dsbD	1.8.1.8	COG4232	Thiol:disulfide interchange protein DsbD
KJINAMHN_00023	tRNA	76				tRNA-Gly(gcc)
KJINAMHN_00024	CDS	951	cmoB	2.5.1.-	COG0500	tRNA U34 carboxymethyltransferase
KJINAMHN_00025	CDS	738	cmoA	2.1.3.-	COG0500	Carboxy-S-adenosyl-L-methionine synthase
KJINAMHN_00026	CDS	642	tatB			Sec-independent protein translocase protein TatB
KJINAMHN_00027	CDS	249	tatA			Sec-independent protein translocase protein TatA
KJINAMHN_00028	tRNA	76				tRNA-Gly(gcc)
KJINAMHN_00029	tRNA	74				tRNA-Cys(gca)
KJINAMHN_00030	CDS	1890	dnaX	2.7.7.7	COG2812	DNA polymerase III subunit tau
KJINAMHN_00031	CDS	333	ybaB		COG0718	Nucleoid-associated protein YbaB
KJINAMHN_00032	CDS	606	recR		COG0353	Recombination protein RecR
KJINAMHN_00033	CDS	342		3.9.1.-	COG0537	Purine nucleoside phosphoramidase
KJINAMHN_00034	CDS	513	apt	2.4.2.7		Adenine phosphoribosyltransferase
KJINAMHN_00035	CDS	2457	lptD		COG1452	LPS-assembly protein LptD
KJINAMHN_00036	CDS	1344	hslU		COG1220	ATP-dependent protease ATPase subunit HslU
KJINAMHN_00037	CDS	540	hslV	3.4.25.2	COG5405	ATP-dependent protease subunit HslV
KJINAMHN_00038	CDS	717				hypothetical protein
KJINAMHN_00039	CDS	798			COG0725	Putative binding protein
KJINAMHN_00040	CDS	777	cysW		COG4208	Sulfate transport system permease protein CysW
KJINAMHN_00041	CDS	699	cysA_1	7.3.2.3	COG1118	Sulfate/thiosulfate import ATP-binding protein CysA
KJINAMHN_00042	CDS	840	nadC_2	2.4.2.19	COG0157	putative nicotinate-nucleotide pyrophosphorylase [carboxylating]
KJINAMHN_00043	CDS	1629				hypothetical protein
KJINAMHN_00044	CDS	2922				hypothetical protein
KJINAMHN_00045	CDS	597	pucB		COG2068	Purine catabolism protein PucB
KJINAMHN_00046	CDS	1392	gabD1	1.2.1.79	COG1012	Succinate-semialdehyde dehydrogenase [NADP(+)] 1
KJINAMHN_00047	CDS	882	yddG		COG0697	Aromatic amino acid exporter YddG
KJINAMHN_00048	CDS	1017	cydB	7.1.1.7	COG1294	Cytochrome bd-I ubiquinol oxidase subunit 2
KJINAMHN_00049	CDS	1323	appC	7.1.1.3	COG1271	Cytochrome bd-II ubiquinol oxidase subunit 1
KJINAMHN_00050	CDS	258				hypothetical protein
KJINAMHN_00051	CDS	651	yiaD		COG2885	putative lipoprotein YiaD
KJINAMHN_00052	CDS	1473				hypothetical protein
KJINAMHN_00053	CDS	1326				hypothetical protein
KJINAMHN_00054	CDS	1293	davT_1	2.6.1.48	COG0160	5-aminovalerate aminotransferase DavT
KJINAMHN_00055	CDS	1389	gabD_2	1.2.1.79	COG1012	Succinate-semialdehyde dehydrogenase [NADP(+)]
KJINAMHN_00056	CDS	1098				hypothetical protein
KJINAMHN_00057	CDS	519	def	3.5.1.88	COG0242	Peptide deformylase
KJINAMHN_00058	CDS	942	fmt	2.1.2.9	COG0223	Methionyl-tRNA formyltransferase
KJINAMHN_00059	CDS	1530	rsmB	2.1.1.176	COG0144	Ribosomal RNA small subunit methyltransferase B
KJINAMHN_00060	CDS	561				hypothetical protein
KJINAMHN_00061	CDS	2145	sasA_1	2.7.-.-		Adaptive-response sensory-kinase SasA
KJINAMHN_00062	CDS	1386	argH	4.3.2.1	COG0165	Argininosuccinate lyase
KJINAMHN_00063	CDS	2157				hypothetical protein
KJINAMHN_00064	CDS	594				hypothetical protein
KJINAMHN_00065	CDS	789	menH_2	4.2.99.20		2-succinyl-6-hydroxy-2,4-cyclohexadiene-1-carboxylate synthase
KJINAMHN_00066	CDS	1164	bioF	2.3.1.47	COG0156	8-amino-7-oxononanoate synthase
KJINAMHN_00067	CDS	768	bioC	2.1.1.197		Malonyl-[acyl-carrier protein] O-methyltransferase
KJINAMHN_00068	CDS	495	purE	5.4.99.18	COG0041	N5-carboxyaminoimidazole ribonucleotide mutase
KJINAMHN_00069	CDS	1125	purK	6.3.4.18		N5-carboxyaminoimidazole ribonucleotide synthase
KJINAMHN_00070	CDS	714	purC	6.3.2.6	COG0152	Phosphoribosylaminoimidazole-succinocarboxamide synthase
KJINAMHN_00071	CDS	1401	purF	2.4.2.14	COG0034	Amidophosphoribosyltransferase
KJINAMHN_00072	CDS	1011	purM	6.3.3.1	COG0150	Phosphoribosylformylglycinamidine cyclo-ligase
KJINAMHN_00073	CDS	585	purN	2.1.2.2		Phosphoribosylglycinamide formyltransferase
KJINAMHN_00074	CDS	1542	purH			Bifunctional purine biosynthesis protein PurH
KJINAMHN_00075	CDS	1581		1.4.3.2	COG1231	L-amino acid oxidase
KJINAMHN_00076	CDS	414	fdhC_2			Fructose dehydrogenase cytochrome subunit
KJINAMHN_00077	CDS	900	mrr		COG1715	Mrr restriction system protein
KJINAMHN_00078	CDS	1260	purD	6.3.4.13	COG0151	Phosphoribosylamine--glycine ligase
KJINAMHN_00079	CDS	1401				hypothetical protein
KJINAMHN_00080	CDS	960	selD	2.7.9.3	COG0709	Selenide, water dikinase
KJINAMHN_00081	CDS	873	nadK	2.7.1.23		NAD kinase
KJINAMHN_00082	CDS	438				hypothetical protein
KJINAMHN_00083	CDS	603	mepS	3.4.-.-	COG0791	Murein DD-endopeptidase MepS/Murein LD-carboxypeptidase
KJINAMHN_00084	CDS	918	metAA	2.3.1.31		Homoserine O-acetyltransferase
KJINAMHN_00085	CDS	564	ves			Protein Ves
KJINAMHN_00086	CDS	1371	proY		COG1113	Proline-specific permease ProY
KJINAMHN_00087	CDS	1005				hypothetical protein
KJINAMHN_00088	CDS	309	ftsB			Cell division protein FtsB
KJINAMHN_00089	CDS	1089	prfA		COG0216	Peptide chain release factor RF1
KJINAMHN_00090	CDS	1827	cpdB	3.1.3.6	COG0737	2',3'-cyclic-nucleotide 2'-phosphodiesterase/3'-nucleotidase
KJINAMHN_00091	CDS	924	rpoS		COG0568	RNA polymerase sigma factor RpoS
KJINAMHN_00092	CDS	420	nhaX		COG0589	Stress response protein NhaX
KJINAMHN_00093	CDS	996	gapA	1.2.1.12	COG0057	Glyceraldehyde-3-phosphate dehydrogenase A
KJINAMHN_00094	CDS	1491	pepA_1	3.4.11.1	COG0260	Cytosol aminopeptidase
KJINAMHN_00095	CDS	1290	miaB	2.8.4.3	COG0621	tRNA-2-methylthio-N(6)-dimethylallyladenosine synthase
KJINAMHN_00096	CDS	861	ywqG		COG3878	putative protein YwqG
KJINAMHN_00097	CDS	768	yfiH	1.10.3.-	COG1496	Polyphenol oxidase
KJINAMHN_00098	CDS	972	rluD	5.4.99.23	COG0564	Ribosomal large subunit pseudouridine synthase D
KJINAMHN_00099	CDS	765	bamD		COG4105	Outer membrane protein assembly factor BamD
KJINAMHN_00100	CDS	1263	waaA	2.4.99.12	COG1519	3-deoxy-D-manno-octulosonic acid transferase
KJINAMHN_00101	CDS	693				hypothetical protein
KJINAMHN_00102	CDS	426	msrB	1.8.4.12		Peptide methionine sulfoxide reductase MsrB
KJINAMHN_00103	CDS	1296	tcyP_1		COG1823	L-cystine uptake protein TcyP
KJINAMHN_00104	CDS	729				hypothetical protein
KJINAMHN_00105	CDS	357				hypothetical protein
KJINAMHN_00106	tRNA	77				tRNA-Arg(ccg)
KJINAMHN_00107	CDS	396	nudG	3.6.1.65	COG0494	CTP pyrophosphohydrolase
KJINAMHN_00108	CDS	2943	uvrB_1			UvrABC system protein B
KJINAMHN_00109	CDS	867				hypothetical protein
KJINAMHN_00110	CDS	549	folE	3.5.4.16	COG0302	GTP cyclohydrolase 1
KJINAMHN_00111	CDS	282				hypothetical protein
KJINAMHN_00112	CDS	1086	mutY	3.2.2.31	COG1194	Adenine DNA glycosylase
KJINAMHN_00113	CDS	756	cmoM	2.1.1.-	COG0500	tRNA 5-carboxymethoxyuridine methyltransferase
KJINAMHN_00114	CDS	450				hypothetical protein
KJINAMHN_00115	CDS	912	ravA	3.6.3.-		ATPase RavA
KJINAMHN_00116	CDS	888				hypothetical protein
KJINAMHN_00117	CDS	2007	tgpA	2.3.2.13	COG1305	Protein-glutamine gamma-glutamyltransferase
KJINAMHN_00118	CDS	225	slyX			Protein SlyX
KJINAMHN_00119	CDS	588	fdoG	1.17.1.9	COG0243	Formate dehydrogenase-O major subunit
KJINAMHN_00120	CDS	2430	fdnG	1.17.5.3	COG0243	Formate dehydrogenase, nitrate-inducible, major subunit
KJINAMHN_00121	CDS	939	fdnH		COG0437	Formate dehydrogenase, nitrate-inducible, iron-sulfur subunit
KJINAMHN_00122	CDS	666	fdoI		COG2864	Formate dehydrogenase, cytochrome b556(fdo) subunit
KJINAMHN_00123	CDS	876	fdhE			Protein FdhE
KJINAMHN_00124	CDS	528	yagU_1		COG3477	Inner membrane protein YagU
KJINAMHN_00125	CDS	1383		1.18.1.2		Ferredoxin--NADP reductase
KJINAMHN_00126	CDS	2124	btuB_1			Vitamin B12 transporter BtuB
KJINAMHN_00127	CDS	819	COQ5	2.1.1.163		2-methoxy-6-polyprenyl-1,4-benzoquinol methylase, mitochondrial
KJINAMHN_00128	CDS	756			COG1120	putative ABC transporter ATP-binding protein
KJINAMHN_00129	CDS	987			COG0609	putative ABC transporter permease protein
KJINAMHN_00130	CDS	1053	btuF_1			Vitamin B12-binding protein
KJINAMHN_00131	CDS	675	yhhQ		COG1738	Queuosine precursor transporter
KJINAMHN_00132	CDS	231				hypothetical protein
KJINAMHN_00133	CDS	1164	ygiC	6.3.1.-	COG0754	Putative acid--amine ligase YgiC
KJINAMHN_00134	CDS	714				hypothetical protein
KJINAMHN_00135	CDS	324				hypothetical protein
KJINAMHN_00136	CDS	666				hypothetical protein
KJINAMHN_00137	CDS	1017	lplA	6.3.1.20	COG0095	Lipoate-protein ligase A
KJINAMHN_00138	CDS	807				hypothetical protein
KJINAMHN_00139	CDS	1962				hypothetical protein
KJINAMHN_00140	CDS	1533	gpmI	5.4.2.12	COG0696	2,3-bisphosphoglycerate-independent phosphoglycerate mutase
KJINAMHN_00141	CDS	1374				hypothetical protein
KJINAMHN_00142	CDS	2817	uvrA_1		COG0178	UvrABC system protein A
KJINAMHN_00143	CDS	444				hypothetical protein
KJINAMHN_00144	CDS	1020	ilvE	2.6.1.42	COG0115	Branched-chain-amino-acid aminotransferase
KJINAMHN_00145	CDS	3483	pycA	6.4.1.1		Pyruvate carboxylase
KJINAMHN_00146	CDS	564	betI			HTH-type transcriptional regulator BetI
KJINAMHN_00147	CDS	525				hypothetical protein
KJINAMHN_00148	CDS	903	murQ	4.2.1.126	COG2103	N-acetylmuramic acid 6-phosphate etherase
KJINAMHN_00149	CDS	1155	anmK	2.7.1.170	COG2377	Anhydro-N-acetylmuramic acid kinase
KJINAMHN_00150	CDS	1884	rpoD		COG0568	RNA polymerase sigma factor RpoD
KJINAMHN_00151	CDS	978	dusA	1.3.1.-	COG0042	tRNA-dihydrouridine(20/20a) synthase
KJINAMHN_00152	CDS	1542				hypothetical protein
KJINAMHN_00153	CDS	447	yqeY		COG1610	putative protein YqeY
KJINAMHN_00154	CDS	1737	dnaG	2.7.7.-	COG0358	DNA primase
KJINAMHN_00155	CDS	675				hypothetical protein
KJINAMHN_00156	CDS	1851	ilvD	4.2.1.9	COG0129	Dihydroxy-acid dehydratase
KJINAMHN_00157	CDS	348	yjcH		COG3162	Inner membrane protein YjcH
KJINAMHN_00158	CDS	1710	actP_1		COG4147	Cation/acetate symporter ActP
KJINAMHN_00159	CDS	843	rlmJ	2.1.1.266	COG2961	Ribosomal RNA large subunit methyltransferase J
KJINAMHN_00160	CDS	885	ribN			Riboflavin transporter
KJINAMHN_00161	CDS	903	era		COG1159	GTPase Era
KJINAMHN_00162	CDS	675	rnc	3.1.26.3	COG0571	Ribonuclease 3
KJINAMHN_00163	CDS	807	lepB	3.4.21.89	COG0681	Signal peptidase I
KJINAMHN_00164	CDS	1791	lepA	3.6.5.-	COG0481	Elongation factor 4
KJINAMHN_00165	CDS	1275				hypothetical protein
KJINAMHN_00166	CDS	1425				hypothetical protein
KJINAMHN_00167	CDS	351				hypothetical protein
KJINAMHN_00168	CDS	840	rsmI	2.1.1.198	COG0313	Ribosomal RNA small subunit methyltransferase I
KJINAMHN_00169	CDS	1230	yajR		COG0477	Inner membrane transport protein YajR
KJINAMHN_00170	CDS	741	deoC	4.1.2.4	COG0274	Deoxyribose-phosphate aldolase
KJINAMHN_00171	CDS	780	suhB	3.1.3.25	COG0483	Inositol-1-monophosphatase
KJINAMHN_00172	CDS	786				hypothetical protein
KJINAMHN_00173	CDS	1329	cpxA	2.7.13.3		Sensor histidine kinase CpxA
KJINAMHN_00174	CDS	687	cpxR_1		COG0745	Transcriptional regulatory protein CpxR
KJINAMHN_00175	CDS	411				hypothetical protein
KJINAMHN_00176	CDS	282				hypothetical protein
KJINAMHN_00177	CDS	606	mlaC		COG2854	Intermembrane phospholipid transport system binding protein MlaC
KJINAMHN_00178	CDS	999	murB	1.3.1.98	COG0812	UDP-N-acetylenolpyruvoylglucosamine reductase
KJINAMHN_00179	CDS	1215				hypothetical protein
KJINAMHN_00180	CDS	1902	ppiD	5.2.1.8	COG0760	Peptidyl-prolyl cis-trans isomerase D
KJINAMHN_00181	CDS	2571				hypothetical protein
KJINAMHN_00182	CDS	1596	arnT	2.4.2.43		Undecaprenyl phosphate-alpha-4-amino-4-deoxy-L-arabinose arabinosyl transferase
KJINAMHN_00183	CDS	411	fur		COG0735	Ferric uptake regulation protein
KJINAMHN_00184	CDS	1050	fbp	3.1.3.11	COG0158	Fructose-1,6-bisphosphatase class 1
KJINAMHN_00185	CDS	567	efp		COG0231	Elongation factor P
KJINAMHN_00186	CDS	591	petA	7.1.1.8	COG0723	Ubiquinol-cytochrome c reductase iron-sulfur subunit
KJINAMHN_00187	CDS	1275	petB		COG1290	Cytochrome b
KJINAMHN_00188	CDS	828	petC		COG2857	Ammonia monooxygenase gamma subunit
KJINAMHN_00189	CDS	600	sspA		COG0625	Stringent starvation protein A
KJINAMHN_00190	CDS	468				hypothetical protein
KJINAMHN_00191	CDS	537	ppa	3.6.1.1	COG0221	Inorganic pyrophosphatase
KJINAMHN_00192	CDS	624				hypothetical protein
KJINAMHN_00193	CDS	744	modA		COG0725	Molybdate-binding protein ModA
KJINAMHN_00194	CDS	669	modB		COG4149	Molybdenum transport system permease protein ModB
KJINAMHN_00195	CDS	672	cysA_2	7.3.2.3	COG1118	Sulfate/thiosulfate import ATP-binding protein CysA
KJINAMHN_00196	CDS	387	crcB			Putative fluoride ion transporter CrcB
KJINAMHN_00197	CDS	765	trmJ	2.1.1.-		tRNA (cytidine/uridine/adenosine-2'-O-)-methyltransferase TrmJ
KJINAMHN_00198	CDS	771	cysE	2.3.1.30	COG1045	Serine acetyltransferase
KJINAMHN_00199	CDS	1215	argG	6.3.4.5	COG0137	Argininosuccinate synthase
KJINAMHN_00200	CDS	1389	trkA		COG0569	Trk system potassium uptake protein TrkA
KJINAMHN_00201	CDS	651				hypothetical protein
KJINAMHN_00202	CDS	426	nsrR		COG1959	HTH-type transcriptional repressor NsrR
KJINAMHN_00203	CDS	1233	nadR_1		COG1056	Trifunctional NAD biosynthesis/regulator protein NadR
KJINAMHN_00204	CDS	687	pnuC_1		COG3201	Nicotinamide riboside transporter PnuC
KJINAMHN_00205	CDS	447	rplI		COG0359	50S ribosomal protein L9
KJINAMHN_00206	CDS	225	rpsR		COG0238	30S ribosomal protein S18
KJINAMHN_00207	CDS	363	rpsF		COG0360	30S ribosomal protein S6
KJINAMHN_00208	CDS	795	psd	4.1.1.65	COG0688	Phosphatidylserine decarboxylase proenzyme
KJINAMHN_00209	CDS	771	kdsB	2.7.7.38		3-deoxy-manno-octulosonate cytidylyltransferase
KJINAMHN_00210	CDS	642	eda		COG0800	Putative KHG/KDPG aldolase
KJINAMHN_00211	CDS	798	mepA_1	3.4.24.-	COG3770	Penicillin-insensitive murein endopeptidase
KJINAMHN_00212	CDS	897	ddh	1.4.1.16		Meso-diaminopimelate D-dehydrogenase
KJINAMHN_00213	CDS	963	hemH	4.99.1.1	COG0276	Ferrochelatase
KJINAMHN_00214	CDS	1797	aspS	6.1.1.23	COG0173	Aspartate--tRNA(Asp/Asn) ligase
KJINAMHN_00215	CDS	261				hypothetical protein
KJINAMHN_00216	CDS	303	ihfB		COG0776	Integration host factor subunit beta
KJINAMHN_00217	CDS	1665	rpsA		COG0539	30S ribosomal protein S1
KJINAMHN_00218	CDS	678	cmk	2.7.4.25	COG0283	Cytidylate kinase
KJINAMHN_00219	CDS	168				hypothetical protein
KJINAMHN_00220	CDS	942	hemC	2.5.1.61	COG0181	Porphobilinogen deaminase
KJINAMHN_00221	CDS	2307				hypothetical protein
KJINAMHN_00222	CDS	1326	hemY		COG3071	Protein HemY
KJINAMHN_00223	CDS	828	folP	2.5.1.15		Dihydropteroate synthase
KJINAMHN_00224	CDS	1905	yheS		COG0488	putative ABC transporter ATP-binding protein YheS
KJINAMHN_00225	CDS	402				hypothetical protein
KJINAMHN_00226	CDS	1101				TelA-like protein
KJINAMHN_00227	CDS	1116				hypothetical protein
KJINAMHN_00228	CDS	1464				hypothetical protein
KJINAMHN_00229	CDS	1887				hypothetical protein
KJINAMHN_00230	CDS	1017				hypothetical protein
KJINAMHN_00231	CDS	1146				hypothetical protein
KJINAMHN_00232	CDS	2124	yccS_2		COG1289	Inner membrane protein YccS
KJINAMHN_00233	CDS	1230	sotB		COG2814	Sugar efflux transporter
KJINAMHN_00234	CDS	1050	gutB	1.1.1.-	COG1063	Sorbitol dehydrogenase
KJINAMHN_00235	CDS	660				hypothetical protein
KJINAMHN_00236	CDS	1242				hypothetical protein
KJINAMHN_00237	CDS	1395	fumC	4.2.1.2	COG0114	Fumarate hydratase class II
KJINAMHN_00238	CDS	3399	pyrK			Dihydroorotate dehydrogenase B (NAD(+)), electron transfer subunit
KJINAMHN_00239	CDS	1386	sdcS			Sodium-dependent dicarboxylate transporter SdcS
KJINAMHN_00240	CDS	1005	hemB	4.2.1.24	COG0113	Delta-aminolevulinic acid dehydratase
KJINAMHN_00241	CDS	1068	aroC	4.2.3.5		Chorismate synthase
KJINAMHN_00242	CDS	1320	gltP_1		COG1301	Proton/glutamate-aspartate symporter
KJINAMHN_00243	CDS	1233		2.7.2.4	COG0527	Aspartate kinase
KJINAMHN_00244	CDS	720	yueD	1.1.1.320		Benzil reductase ((S)-benzoin forming)
KJINAMHN_00245	CDS	435	rppH_1	3.6.1.-		RNA pyrophosphohydrolase
KJINAMHN_00246	CDS	336	erpA		COG0316	Iron-sulfur cluster insertion protein ErpA
KJINAMHN_00247	CDS	921	qmcA		COG0330	Protein QmcA
KJINAMHN_00248	CDS	447	ybbJ		COG1585	Inner membrane protein YbbJ
KJINAMHN_00249	CDS	1065				hypothetical protein
KJINAMHN_00250	CDS	1368	der_1			GTPase Der
KJINAMHN_00251	CDS	1449	pepD	3.4.13.18	COG2195	Cytosol non-specific dipeptidase
KJINAMHN_00252	CDS	1713				hypothetical protein
KJINAMHN_00253	CDS	1056	lptG		COG0795	Lipopolysaccharide export system permease protein LptG
KJINAMHN_00254	CDS	1068	lptF		COG0795	Lipopolysaccharide export system permease protein LptF
KJINAMHN_00255	CDS	1113	tgt	2.4.2.29	COG0343	Queuine tRNA-ribosyltransferase
KJINAMHN_00256	CDS	432	holC	2.7.7.7	COG2927	DNA polymerase III subunit chi
KJINAMHN_00257	CDS	3423	smc_1			Chromosome partition protein Smc
KJINAMHN_00258	CDS	339				hypothetical protein
KJINAMHN_00259	CDS	1302				hypothetical protein
KJINAMHN_00260	CDS	1506	cstA		COG1966	Peptide transporter CstA
KJINAMHN_00261	CDS	888	metR			HTH-type transcriptional regulator MetR
KJINAMHN_00262	CDS	2136	prc	3.4.21.102	COG0793	Tail-specific protease
KJINAMHN_00263	CDS	1083	serC	2.6.1.52	COG1932	Phosphoserine aminotransferase
KJINAMHN_00264	CDS	609	clpP	3.4.21.92	COG0740	ATP-dependent Clp protease proteolytic subunit
KJINAMHN_00265	CDS	1299	clpX		COG1219	ATP-dependent Clp protease ATP-binding subunit ClpX
KJINAMHN_00266	CDS	645	rnt	3.1.13.-	COG0847	Ribonuclease T
KJINAMHN_00267	CDS	1563	gshA	6.3.2.2	COG2918	Glutamate--cysteine ligase
KJINAMHN_00268	CDS	981	alx		COG0861	Putative membrane-bound redox modulator Alx
KJINAMHN_00269	CDS	1317	adeP_1		COG2252	Adenine permease AdeP
KJINAMHN_00270	CDS	1011	mdtA			Multidrug resistance protein MdtA
KJINAMHN_00271	CDS	3057	bepE			Efflux pump membrane transporter BepE
KJINAMHN_00272	CDS	555	olsG	2.1.1.344		Ornithine lipid N-methyltransferase
KJINAMHN_00273	CDS	468	slyB_1		COG3133	Outer membrane lipoprotein SlyB
KJINAMHN_00274	CDS	1290	gltP_2		COG1301	Proton/glutamate-aspartate symporter
KJINAMHN_00275	CDS	1383	ppnN	3.2.2.-	COG1611	Pyrimidine/purine nucleotide 5'-monophosphate nucleosidase
KJINAMHN_00276	CDS	774	yaaA		COG3022	Peroxide stress resistance protein YaaA
KJINAMHN_00277	CDS	780				hypothetical protein
KJINAMHN_00278	CDS	1263	pyrP			Uracil permease
KJINAMHN_00279	CDS	561	tpd		COG3470	34 kDa membrane antigen
KJINAMHN_00280	CDS	342				hypothetical protein
KJINAMHN_00281	CDS	843	efeU		COG0672	Ferrous iron permease EfeU
KJINAMHN_00282	CDS	897	efeO		COG2822	Iron uptake system component EfeO
KJINAMHN_00283	CDS	1260	efeB	1.11.1.-	COG2837	Deferrochelatase/peroxidase EfeB
KJINAMHN_00284	CDS	432		3.1.2.-	COG2050	Putative esterase
KJINAMHN_00285	CDS	363				hypothetical protein
KJINAMHN_00286	CDS	1098	mnmA	2.8.1.13	COG0482	tRNA-specific 2-thiouridylase MnmA
KJINAMHN_00287	CDS	444				hypothetical protein
KJINAMHN_00288	CDS	747	truA	5.4.99.12	COG0101	tRNA pseudouridine synthase A
KJINAMHN_00289	CDS	858	hexR		COG1737	HTH-type transcriptional regulator HexR
KJINAMHN_00290	CDS	978	glk	2.7.1.2	COG0837	Glucokinase
KJINAMHN_00291	CDS	612	engB		COG0218	putative GTP-binding protein EngB
KJINAMHN_00292	CDS	420				hypothetical protein
KJINAMHN_00293	CDS	2097			COG1292	Glycine betaine transporter
KJINAMHN_00294	CDS	849	purU	3.5.1.10	COG0788	Formyltetrahydrofolate deformylase
KJINAMHN_00295	CDS	426	exbD_1		COG0848	Biopolymer transport protein ExbD
KJINAMHN_00296	CDS	684	tolQ_1		COG0811	Tol-Pal system protein TolQ
KJINAMHN_00297	CDS	690				hypothetical protein
KJINAMHN_00298	CDS	801	dapB	1.17.1.8	COG0289	4-hydroxy-tetrahydrodipicolinate reductase
KJINAMHN_00299	CDS	1533				hypothetical protein
KJINAMHN_00300	CDS	1443	brnQ		COG1114	Branched-chain amino acid transport system 2 carrier protein
KJINAMHN_00301	CDS	1017	pyrD	1.3.5.2	COG0167	Dihydroorotate dehydrogenase (quinone)
KJINAMHN_00302	CDS	744	recO		COG1381	DNA repair protein RecO
KJINAMHN_00303	CDS	456	mlaD		COG1463	Intermembrane phospholipid transport system binding protein MlaD
KJINAMHN_00304	CDS	648	rnhB	3.1.26.4	COG0164	Ribonuclease HII
KJINAMHN_00305	CDS	1134	lpxB	2.4.1.182	COG0763	Lipid-A-disaccharide synthase
KJINAMHN_00306	CDS	789	lpxA	2.3.1.129	COG1043	Acyl-[acyl-carrier-protein]--UDP-N-acetylglucosamine O-acyltransferase
KJINAMHN_00307	CDS	441	fabZ	4.2.1.59		3-hydroxyacyl-[acyl-carrier-protein] dehydratase FabZ
KJINAMHN_00308	CDS	1035	lpxD	2.3.1.191	COG1044	UDP-3-O-(3-hydroxymyristoyl)glucosamine N-acyltransferase
KJINAMHN_00309	CDS	510	skp		COG2825	Chaperone protein Skp
KJINAMHN_00310	CDS	2391	bamA		COG4775	Outer membrane protein assembly factor BamA
KJINAMHN_00311	CDS	1350	rseP	3.4.24.-	COG0750	Regulator of sigma-E protease RseP
KJINAMHN_00312	CDS	1176	dxr	1.1.1.267	COG0743	1-deoxy-D-xylulose 5-phosphate reductoisomerase
KJINAMHN_00313	CDS	810				hypothetical protein
KJINAMHN_00314	CDS	720	ispU	2.5.1.31	COG0020	Ditrans,polycis-undecaprenyl-diphosphate synthase ((2E,6E)-farnesyl-diphosphate specific)
KJINAMHN_00315	CDS	546	frr		COG0233	Ribosome-recycling factor
KJINAMHN_00316	CDS	720	pyrH	2.7.4.22	COG0528	Uridylate kinase
KJINAMHN_00317	CDS	2424	rnr	3.1.13.1	COG0557	Ribonuclease R
KJINAMHN_00318	CDS	1011	lpxK	2.7.1.130	COG1663	Tetraacyldisaccharide 4'-kinase
KJINAMHN_00319	CDS	399	recX		COG2137	Regulatory protein RecX
KJINAMHN_00320	CDS	576				hypothetical protein
KJINAMHN_00321	CDS	1626				hypothetical protein
KJINAMHN_00322	CDS	2895			COG0247	putative protein
KJINAMHN_00323	CDS	1125	zapE		COG1485	Cell division protein ZapE
KJINAMHN_00324	CDS	456	tadA	3.5.4.33	COG0590	tRNA-specific adenosine deaminase
KJINAMHN_00325	CDS	561				hypothetical protein
KJINAMHN_00326	CDS	837	proC	1.5.1.2	COG0345	Pyrroline-5-carboxylate reductase
KJINAMHN_00327	tRNA	76				tRNA-Gly(gcc)
KJINAMHN_00328	CDS	987				hypothetical protein
KJINAMHN_00329	CDS	1197	rbbA_1		COG0842	Ribosome-associated ATPase
KJINAMHN_00330	CDS	1185	lnrN		COG0842	Linearmycin resistance permease protein LnrN
KJINAMHN_00331	CDS	1428				hypothetical protein
KJINAMHN_00332	CDS	711	rspR		COG1802	HTH-type transcriptional repressor RspR
KJINAMHN_00333	CDS	1215	lhgD	1.1.5.-	COG0579	L-2-hydroxyglutarate dehydrogenase
KJINAMHN_00334	CDS	1389	gabD_3	1.2.1.79	COG1012	Succinate-semialdehyde dehydrogenase [NADP(+)]
KJINAMHN_00335	CDS	1305	davT_2	2.6.1.48	COG0160	5-aminovalerate aminotransferase DavT
KJINAMHN_00336	CDS	1380	yhdG		COG0531	putative amino acid permease YhdG
KJINAMHN_00337	CDS	1641	groL		COG0459	60 kDa chaperonin
KJINAMHN_00338	CDS	291	groS		COG0234	10 kDa chaperonin
KJINAMHN_00339	CDS	2178	cadA	3.6.3.3		Cadmium-transporting ATPase
KJINAMHN_00340	CDS	429	zntR		COG0789	HTH-type transcriptional regulator ZntR
KJINAMHN_00341	CDS	918	glaH	1.14.11.-		Glutarate 2-hydroxylase
KJINAMHN_00342	CDS	321				hypothetical protein
KJINAMHN_00343	CDS	1755	sasA_2	2.7.-.-		Adaptive-response sensory-kinase SasA
KJINAMHN_00344	CDS	912	cheB_1	3.5.1.44		Protein-glutamate methylesterase/protein-glutamine glutaminase
KJINAMHN_00345	CDS	618	lolA			Outer-membrane lipoprotein carrier protein
KJINAMHN_00346	CDS	1317	rarA		COG2256	Replication-associated recombination protein A
KJINAMHN_00347	CDS	633	tenI	5.3.99.10	COG0352	Thiazole tautomerase
KJINAMHN_00348	CDS	207	thiS		COG2104	Sulfur carrier protein ThiS
KJINAMHN_00349	CDS	768	thiG	2.8.1.10	COG2022	Thiazole synthase
KJINAMHN_00350	CDS	1029				hypothetical protein
KJINAMHN_00351	CDS	1479	yflS		COG0471	Putative malate transporter YflS
KJINAMHN_00352	CDS	1623	prpR		COG1221	Propionate catabolism operon regulatory protein
KJINAMHN_00353	CDS	888	prpB	4.1.3.30	COG2513	2-methylisocitrate lyase
KJINAMHN_00354	CDS	1161	prpC	2.3.3.5	COG0372	2-methylcitrate synthase
KJINAMHN_00355	CDS	1428	prpD	4.2.1.79	COG2079	2-methylcitrate dehydratase
KJINAMHN_00356	CDS	1017	ynaI		COG0668	Low conductance mechanosensitive channel YnaI
KJINAMHN_00357	CDS	1017				hypothetical protein
KJINAMHN_00358	CDS	672	estB	3.1.1.1	COG0400	Carboxylesterase 2
KJINAMHN_00359	CDS	297	phnX	3.11.1.1		Phosphonoacetaldehyde hydrolase
KJINAMHN_00360	CDS	702	nagK	3.7.1.20		Fumarylpyruvate hydrolase
KJINAMHN_00361	CDS	312				hypothetical protein
KJINAMHN_00362	CDS	1428	prr	1.2.1.19	COG1012	Gamma-aminobutyraldehyde dehydrogenase
KJINAMHN_00363	CDS	1359	patA_1	2.6.1.82	COG4992	Putrescine aminotransferase
KJINAMHN_00364	CDS	1446	mleN_1		COG1757	Malate-2H(+)/Na(+)-lactate antiporter
KJINAMHN_00365	CDS	1137	iscS_1	2.8.1.7	COG1104	Cysteine desulfurase IscS
KJINAMHN_00366	CDS	933				hypothetical protein
KJINAMHN_00367	CDS	3327				hypothetical protein
KJINAMHN_00368	CDS	834				hypothetical protein
KJINAMHN_00369	CDS	2313				hypothetical protein
KJINAMHN_00370	CDS	525				hypothetical protein
KJINAMHN_00371	CDS	2160	recF_1			DNA replication and repair protein RecF
KJINAMHN_00372	CDS	237				hypothetical protein
KJINAMHN_00373	CDS	2223	uvrB_2			UvrABC system protein B
KJINAMHN_00374	CDS	570				hypothetical protein
KJINAMHN_00375	CDS	309			COG3039	IS5 family transposase ISAba31
KJINAMHN_00376	CDS	189				hypothetical protein
KJINAMHN_00377	CDS	2139	uvrA_2		COG0178	UvrABC system protein A
KJINAMHN_00378	CDS	1089				hypothetical protein
KJINAMHN_00379	CDS	1134				hypothetical protein
KJINAMHN_00380	CDS	417				hypothetical protein
KJINAMHN_00381	CDS	255				hypothetical protein
KJINAMHN_00382	CDS	381			COG3039	IS5 family transposase ISAba31
KJINAMHN_00383	tRNA	86				tRNA-Leu(caa)
KJINAMHN_00384	CDS	1632	nfdA	3.5.1.91		N-substituted formamide deformylase
KJINAMHN_00385	CDS	879	pdxY	2.7.1.35	COG2240	Pyridoxal kinase PdxY
KJINAMHN_00386	CDS	309				hypothetical protein
KJINAMHN_00387	CDS	615	sodA	1.15.1.1		Superoxide dismutase [Mn]
KJINAMHN_00388	CDS	522				hypothetical protein
KJINAMHN_00389	CDS	1635				hypothetical protein
KJINAMHN_00390	tRNA	85				tRNA-Tyr(gta)
KJINAMHN_00391	tRNA	74				tRNA-Gly(tcc)
KJINAMHN_00392	tRNA	76				tRNA-Thr(ggt)
KJINAMHN_00393	CDS	1191	tufA_1		COG0050	Elongation factor Tu
KJINAMHN_00394	tRNA	76				tRNA-Trp(cca)
KJINAMHN_00395	CDS	393	secE			Protein translocase subunit SecE
KJINAMHN_00396	CDS	528	nusG		COG0250	Transcription termination/antitermination protein NusG
KJINAMHN_00397	CDS	432	rplK		COG0080	50S ribosomal protein L11
KJINAMHN_00398	CDS	693	rplA		COG0081	50S ribosomal protein L1
KJINAMHN_00399	CDS	504	rplJ		COG0244	50S ribosomal protein L10
KJINAMHN_00400	CDS	369	rplL			50S ribosomal protein L7/L12
KJINAMHN_00401	CDS	4119	rpoB	2.7.7.6		DNA-directed RNA polymerase subunit beta
KJINAMHN_00402	CDS	4158	rpoC	2.7.7.6	COG0086	DNA-directed RNA polymerase subunit beta'
KJINAMHN_00403	CDS	432	nusB			Transcription antitermination protein NusB
KJINAMHN_00404	CDS	1119	pilT_1		COG2805	Twitching mobility protein
KJINAMHN_00405	CDS	741	tcdA	6.1.-.-	COG1179	tRNA threonylcarbamoyladenosine dehydratase
KJINAMHN_00406	CDS	642				hypothetical protein
KJINAMHN_00407	CDS	633	gmk	2.7.4.8	COG0194	Guanylate kinase
KJINAMHN_00408	CDS	261	rpoZ	2.7.7.6		DNA-directed RNA polymerase subunit omega
KJINAMHN_00409	CDS	2199	spoT	3.1.7.2	COG0317	Guanosine-3',5'-bis(diphosphate) 3'-pyrophosphohydrolase
KJINAMHN_00410	CDS	2340	rcsC_1	2.7.13.3		Sensor histidine kinase RcsC
KJINAMHN_00411	CDS	1218	roxA	1.14.11.47	COG2850	50S ribosomal protein L16 3-hydroxylase
KJINAMHN_00412	CDS	486				hypothetical protein
KJINAMHN_00413	CDS	267	rpsO		COG0184	30S ribosomal protein S15
KJINAMHN_00414	CDS	2100	pnp	2.7.7.8	COG1185	Polyribonucleotide nucleotidyltransferase
KJINAMHN_00415	CDS	174				hypothetical protein
KJINAMHN_00416	CDS	984	acuI	1.3.1.84	COG0604	Acrylyl-CoA reductase AcuI
KJINAMHN_00417	CDS	576	rppH_2	3.6.1.-	COG0494	RNA pyrophosphohydrolase
KJINAMHN_00418	CDS	759	cysZ		COG2981	Sulfate transporter CysZ
KJINAMHN_00419	CDS	738	mipA_1		COG3713	MltA-interacting protein
KJINAMHN_00420	CDS	573	tag	3.2.2.20	COG2818	DNA-3-methyladenine glycosylase 1
KJINAMHN_00421	CDS	465	bfr_1	1.16.3.1	COG2193	Bacterioferritin
KJINAMHN_00422	CDS	471	bfr_2	1.16.3.1	COG2193	Bacterioferritin
KJINAMHN_00423	CDS	867	hcpC	3.5.2.6	COG0790	Putative beta-lactamase HcpC
KJINAMHN_00424	CDS	903	tsdA_1	1.8.2.2	COG3258	Thiosulfate dehydrogenase
KJINAMHN_00425	CDS	1362	adhB_1	1.1.5.5		Alcohol dehydrogenase (quinone), cytochrome c subunit
KJINAMHN_00426	CDS	2244	hemR		COG1629	Hemin receptor
KJINAMHN_00427	CDS	867	btuF_2			Vitamin B12-binding protein
KJINAMHN_00428	CDS	969	hmuU_1		COG0609	Hemin transport system permease protein HmuU
KJINAMHN_00429	CDS	810	hmuV	3.6.3.-	COG4559	Hemin import ATP-binding protein HmuV
KJINAMHN_00430	CDS	2610	gyrA	5.6.2.2	COG0188	DNA gyrase subunit A
KJINAMHN_00431	CDS	666				hypothetical protein
KJINAMHN_00432	CDS	1359	norM		COG0534	Multidrug resistance protein NorM
KJINAMHN_00433	CDS	1503	nnr		COG0062	Bifunctional NAD(P)H-hydrate repair enzyme Nnr
KJINAMHN_00434	CDS	462				hypothetical protein
KJINAMHN_00435	CDS	657				hypothetical protein
KJINAMHN_00436	CDS	1083	apbC		COG0489	Iron-sulfur cluster carrier protein
KJINAMHN_00437	CDS	570	dcd	3.5.4.13		dCTP deaminase
KJINAMHN_00438	CDS	768	map	3.4.11.18	COG0024	Methionine aminopeptidase
KJINAMHN_00439	CDS	1170	ubiH	1.14.13.-	COG0654	2-octaprenyl-6-methoxyphenol hydroxylase
KJINAMHN_00440	CDS	1209	ubiI	1.14.13.240	COG0654	2-octaprenylphenol hydroxylase
KJINAMHN_00441	CDS	339				hypothetical protein
KJINAMHN_00442	CDS	291	zapA		COG3027	Cell division protein ZapA
KJINAMHN_00443	CDS	411				hypothetical protein
KJINAMHN_00444	CDS	990				hypothetical protein
KJINAMHN_00445	CDS	450				hypothetical protein
KJINAMHN_00446	CDS	486	moaC	4.6.1.17	COG0315	Cyclic pyranopterin monophosphate synthase
KJINAMHN_00447	CDS	501	yceD		COG1399	Large ribosomal RNA subunit accumulation protein YceD
KJINAMHN_00448	CDS	195	rpmF		COG0333	50S ribosomal protein L32
KJINAMHN_00449	CDS	1056	plsX	2.3.1.274	COG0416	Phosphate acyltransferase
KJINAMHN_00450	CDS	954	fabH	2.3.1.180	COG0332	3-oxoacyl-[acyl-carrier-protein] synthase 3
KJINAMHN_00451	CDS	945	fabD	2.3.1.39	COG0331	Malonyl CoA-acyl carrier protein transacylase
KJINAMHN_00452	CDS	576	yciB		COG2917	Intracellular septation protein
KJINAMHN_00453	CDS	270	bolA		COG0271	DNA-binding transcriptional regulator BolA
KJINAMHN_00454	CDS	825	cbf2	5.2.1.8	COG0760	Putative peptidyl-prolyl cis-trans isomerase Cbf2
KJINAMHN_00455	CDS	999	sohB	3.4.21.-	COG0616	putative protease SohB
KJINAMHN_00456	CDS	2163	priA	3.6.4.-	COG1198	Primosomal protein N'
KJINAMHN_00457	CDS	516				hypothetical protein
KJINAMHN_00458	CDS	597				hypothetical protein
KJINAMHN_00459	CDS	744	coaX	2.7.1.33	COG1521	Type III pantothenate kinase
KJINAMHN_00460	CDS	960	birA	6.3.4.15	COG0340	Bifunctional ligase/repressor BirA
KJINAMHN_00461	CDS	99				hypothetical protein
KJINAMHN_00462	CDS	1203	tyrB	2.6.1.57	COG1448	Aromatic-amino-acid aminotransferase
KJINAMHN_00463	CDS	1806				hypothetical protein
KJINAMHN_00464	CDS	2082	ppk	2.7.4.1		Polyphosphate kinase
KJINAMHN_00465	CDS	1413				hypothetical protein
KJINAMHN_00466	CDS	2856	rne	3.1.26.12		Ribonuclease E
KJINAMHN_00467	CDS	747				hypothetical protein
KJINAMHN_00468	CDS	2379	mrcB		COG0744	Penicillin-binding protein 1B
KJINAMHN_00469	CDS	846	corC		COG4535	Magnesium and cobalt efflux protein CorC
KJINAMHN_00470	tRNA	77				tRNA-Asn(gtt)
KJINAMHN_00471	CDS	399	ybgC	3.1.2.-	COG0824	Acyl-CoA thioesterase YbgC
KJINAMHN_00472	CDS	708	tolQ_2		COG0811	Tol-Pal system protein TolQ
KJINAMHN_00473	CDS	441	tolR		COG0848	Tol-Pal system protein TolR
KJINAMHN_00474	CDS	1020				hypothetical protein
KJINAMHN_00475	CDS	1437	oprM		COG1538	Outer membrane protein OprM
KJINAMHN_00476	tRNA	77				tRNA-Pro(ggg)
KJINAMHN_00477	CDS	219	infA		COG0361	Translation initiation factor IF-1
KJINAMHN_00478	CDS	714	rph	2.7.7.56		Ribonuclease PH
KJINAMHN_00479	CDS	732	sfsA		COG1489	Sugar fermentation stimulation protein A
KJINAMHN_00480	CDS	615	hflD		COG2915	High frequency lysogenization protein HflD
KJINAMHN_00481	CDS	954	kamA	5.4.3.2		L-lysine 2,3-aminomutase
KJINAMHN_00482	CDS	939	miaA	2.5.1.75	COG0324	tRNA dimethylallyltransferase
KJINAMHN_00483	CDS	975				hypothetical protein
KJINAMHN_00484	tRNA	77				tRNA-Asn(gtt)
KJINAMHN_00485	CDS	1566	abgT_1		COG2978	p-aminobenzoyl-glutamate transport protein
KJINAMHN_00486	CDS	654				hypothetical protein
KJINAMHN_00487	CDS	1047	argC	1.2.1.38	COG0002	N-acetyl-gamma-glutamyl-phosphate reductase
KJINAMHN_00488	CDS	1218	argJ		COG1364	Arginine biosynthesis bifunctional protein ArgJ
KJINAMHN_00489	CDS	897	argB	2.7.2.8	COG0548	Acetylglutamate kinase
KJINAMHN_00490	CDS	1173	argD	2.6.1.11	COG4992	Acetylornithine aminotransferase
KJINAMHN_00491	CDS	693				hypothetical protein
KJINAMHN_00492	CDS	543	adk	2.7.4.3	COG0563	Adenylate kinase
KJINAMHN_00493	CDS	1239	guaA_1	6.3.5.2		GMP synthase [glutamine-hydrolyzing]
KJINAMHN_00494	CDS	624	abgT_2		COG2978	p-aminobenzoyl-glutamate transport protein
KJINAMHN_00495	CDS	864	abgT_3		COG2978	p-aminobenzoyl-glutamate transport protein
KJINAMHN_00496	CDS	1173	hipO_1	3.5.1.32	COG1473	Hippurate hydrolase
KJINAMHN_00497	CDS	1458	aspA	4.3.1.1	COG1027	Aspartate ammonia-lyase
KJINAMHN_00498	CDS	441	cymR_1			HTH-type transcriptional regulator CymR
KJINAMHN_00499	CDS	936	cysK1	2.5.1.47	COG0031	O-acetylserine sulfhydrylase
KJINAMHN_00500	CDS	663				hypothetical protein
KJINAMHN_00501	CDS	681				hypothetical protein
KJINAMHN_00502	CDS	729	glnQ			Glutamine transport ATP-binding protein GlnQ
KJINAMHN_00503	CDS	831	glnH		COG0834	ABC transporter glutamine-binding protein GlnH
KJINAMHN_00504	CDS	528				hypothetical protein
KJINAMHN_00505	CDS	1197			COG2081	putative protein
KJINAMHN_00506	CDS	390	panD	4.1.1.11	COG0853	Aspartate 1-decarboxylase
KJINAMHN_00507	CDS	1776	thiC	4.1.99.17	COG0422	Phosphomethylpyrimidine synthase
KJINAMHN_00508	CDS	1392				hypothetical protein
KJINAMHN_00509	CDS	396				hypothetical protein
KJINAMHN_00510	CDS	366	hdeA			Acid stress chaperone HdeA
KJINAMHN_00511	CDS	1080				hypothetical protein
KJINAMHN_00512	CDS	789				hypothetical protein
KJINAMHN_00513	CDS	864	mltC	4.2.2.-		Membrane-bound lytic murein transglycosylase C
KJINAMHN_00514	CDS	789	nimR_2			HTH-type transcriptional regulator NimR
KJINAMHN_00515	CDS	927				hypothetical protein
KJINAMHN_00516	CDS	1095				hypothetical protein
KJINAMHN_00517	CDS	1320	proP_1			Proline/betaine transporter
KJINAMHN_00518	CDS	915	gcvA			Glycine cleavage system transcriptional activator
KJINAMHN_00519	CDS	1557	ilvG	2.2.1.6		Acetolactate synthase isozyme 2 large subunit
KJINAMHN_00520	CDS	1299	puuB	1.4.3.-		Gamma-glutamylputrescine oxidoreductase
KJINAMHN_00521	CDS	1035		1.5.1.49	COG2055	Delta(1)-pyrroline-2-carboxylate reductase 1
KJINAMHN_00522	CDS	1494	gabD_4	1.2.1.79	COG1012	Succinate-semialdehyde dehydrogenase [NADP(+)]
KJINAMHN_00523	CDS	1119				hypothetical protein
KJINAMHN_00524	CDS	2097	ftsH_1	3.4.24.-		ATP-dependent zinc metalloprotease FtsH
KJINAMHN_00525	CDS	669	ccmB		COG2386	Heme exporter protein B
KJINAMHN_00526	CDS	636	ccmA	7.6.2.5	COG4133	Cytochrome c biogenesis ATP-binding export protein CcmA
KJINAMHN_00527	CDS	1728				hypothetical protein
KJINAMHN_00528	CDS	459	ccmH		COG3088	Cytochrome c-type biogenesis protein CcmH
KJINAMHN_00529	CDS	552	dsbE		COG0526	Thiol:disulfide interchange protein DsbE
KJINAMHN_00530	CDS	1983	ccmF		COG1138	Cytochrome c-type biogenesis protein CcmF
KJINAMHN_00531	CDS	471	ccmE		COG2332	Cytochrome c-type biogenesis protein CcmE
KJINAMHN_00532	CDS	174				hypothetical protein
KJINAMHN_00533	CDS	741	ccmC		COG0755	Heme exporter protein C
KJINAMHN_00534	CDS	519	dhfrIII	1.5.1.3		Dihydrofolate reductase type 3
KJINAMHN_00535	CDS	2142	aas		COG0204	Bifunctional protein Aas
KJINAMHN_00536	CDS	1179	lplT			Lysophospholipid transporter LplT
KJINAMHN_00537	CDS	615				hypothetical protein
KJINAMHN_00538	CDS	375				hypothetical protein
KJINAMHN_00539	CDS	528				hypothetical protein
KJINAMHN_00540	CDS	303	yhbY		COG1534	RNA-binding protein YhbY
KJINAMHN_00541	CDS	711	rsuA_1	5.4.99.19	COG1187	Ribosomal small subunit pseudouridine synthase A
KJINAMHN_00542	CDS	636	rlmE	2.1.1.166	COG0293	Ribosomal RNA large subunit methyltransferase E
KJINAMHN_00543	CDS	1878	ftsH_2	3.4.24.-	COG0465	ATP-dependent zinc metalloprotease FtsH
KJINAMHN_00544	CDS	468	lrp		COG1522	Leucine-responsive regulatory protein
KJINAMHN_00545	CDS	618	argO			Arginine exporter protein ArgO
KJINAMHN_00546	CDS	1302	adeP_2		COG2252	Adenine permease AdeP
KJINAMHN_00547	CDS	1803	adeC	3.5.4.2		Adenine deaminase
KJINAMHN_00548	CDS	1737	ade	3.5.4.2	COG1001	Adenine deaminase
KJINAMHN_00549	CDS	1455				hypothetical protein
KJINAMHN_00550	CDS	810				hypothetical protein
KJINAMHN_00551	CDS	1338	rstB	2.7.13.3		Sensor protein RstB
KJINAMHN_00552	CDS	681	rstA		COG0745	Transcriptional regulatory protein RstA
KJINAMHN_00553	CDS	654	mtnX	3.1.3.87	COG4359	2-hydroxy-3-keto-5-methylthiopentenyl-1-phosphate phosphatase
KJINAMHN_00554	CDS	828		3.1.1.23		Thermostable monoacylglycerol lipase
KJINAMHN_00555	CDS	360	arnE_1			4-amino-4-deoxy-L-arabinose-phosphoundecaprenol flippase subunit ArnE
KJINAMHN_00556	CDS	414	arnE_2			4-amino-4-deoxy-L-arabinose-phosphoundecaprenol flippase subunit ArnE
KJINAMHN_00557	CDS	858				hypothetical protein
KJINAMHN_00558	CDS	1074				hypothetical protein
KJINAMHN_00559	CDS	1386	davT_3	2.6.1.48	COG0160	5-aminovalerate aminotransferase DavT
KJINAMHN_00560	CDS	741	mipA_2		COG3713	MltA-interacting protein
KJINAMHN_00561	CDS	597				hypothetical protein
KJINAMHN_00562	CDS	405				hypothetical protein
KJINAMHN_00563	CDS	1917	thrS	6.1.1.3	COG0441	Threonine--tRNA ligase
KJINAMHN_00564	CDS	462	infC		COG0290	Translation initiation factor IF-3
KJINAMHN_00565	CDS	198	rpmI		COG0291	50S ribosomal protein L35
KJINAMHN_00566	CDS	357	rplT		COG0292	50S ribosomal protein L20
KJINAMHN_00567	CDS	1014	pheS	6.1.1.20	COG0016	Phenylalanine--tRNA ligase alpha subunit
KJINAMHN_00568	CDS	2367	pheT	6.1.1.20	COG0072	Phenylalanine--tRNA ligase beta subunit
KJINAMHN_00569	CDS	303	ihfA		COG0776	Integration host factor subunit alpha
KJINAMHN_00570	CDS	1854	dxs	2.2.1.7	COG1154	1-deoxy-D-xylulose-5-phosphate synthase
KJINAMHN_00571	CDS	864		2.5.1.10		Farnesyl diphosphate synthase
KJINAMHN_00572	CDS	285	xseB	3.1.11.6	COG1722	Exodeoxyribonuclease 7 small subunit
KJINAMHN_00573	CDS	2289				hypothetical protein
KJINAMHN_00574	CDS	894	glyQ	6.1.1.14	COG0752	Glycine--tRNA ligase alpha subunit
KJINAMHN_00575	CDS	762				hypothetical protein
KJINAMHN_00576	CDS	771	hisN	3.1.3.15	COG0483	Histidinol-phosphatase
KJINAMHN_00577	CDS	681				hypothetical protein
KJINAMHN_00578	tRNA	91				tRNA-Ser(gga)
KJINAMHN_00579	CDS	324				hypothetical protein
KJINAMHN_00580	CDS	366				hypothetical protein
KJINAMHN_00581	CDS	606				hypothetical protein
KJINAMHN_00582	CDS	477	smpB		COG0691	SsrA-binding protein
KJINAMHN_00583	CDS	363				hypothetical protein
KJINAMHN_00584	tRNA	77				tRNA-Arg(acg)
KJINAMHN_00585	tRNA	77				tRNA-Arg(acg)
KJINAMHN_00586	tRNA	76				tRNA-Val(tac)
KJINAMHN_00587	CDS	1353	xanP		COG2233	Xanthine permease XanP
KJINAMHN_00588	CDS	1218	lysN	2.6.1.39	COG1167	2-aminoadipate transaminase
KJINAMHN_00589	CDS	351	yffB		COG1393	Protein YffB
KJINAMHN_00590	CDS	1794	selB		COG3276	Selenocysteine-specific elongation factor
KJINAMHN_00591	CDS	1344	selA	2.9.1.1	COG1921	L-seryl-tRNA(Sec) selenium transferase
KJINAMHN_00592	tRNA	90				tRNA-SeC(tca)
KJINAMHN_00593	CDS	528	pitA_1	2.3.1.-	COG1247	L-methionine sulfoximine/L-methionine sulfone acetyltransferase
KJINAMHN_00594	CDS	1203	bcr			Bicyclomycin resistance protein
KJINAMHN_00595	CDS	567				hypothetical protein
KJINAMHN_00596	CDS	1056	dinB	2.7.7.7	COG0389	DNA polymerase IV
KJINAMHN_00597	CDS	204				hypothetical protein
KJINAMHN_00598	CDS	840				hypothetical protein
KJINAMHN_00599	CDS	1029				hypothetical protein
KJINAMHN_00600	CDS	780	fdhD		COG1526	Sulfur carrier protein FdhD
KJINAMHN_00601	CDS	375	rpsL		COG0048	30S ribosomal protein S12
KJINAMHN_00602	CDS	471	rpsG		COG0049	30S ribosomal protein S7
KJINAMHN_00603	CDS	2097	fusA		COG0480	Elongation factor G
KJINAMHN_00604	CDS	1191	tufA_2		COG0050	Elongation factor Tu
KJINAMHN_00605	CDS	312	rpsJ		COG0051	30S ribosomal protein S10
KJINAMHN_00606	CDS	645	rplC		COG0087	50S ribosomal protein L3
KJINAMHN_00607	CDS	606	rplD		COG0088	50S ribosomal protein L4
KJINAMHN_00608	CDS	303	rplW		COG0089	50S ribosomal protein L23
KJINAMHN_00609	CDS	825	rplB		COG0090	50S ribosomal protein L2
KJINAMHN_00610	CDS	273	rpsS		COG0185	30S ribosomal protein S19
KJINAMHN_00611	CDS	327	rplV		COG0091	50S ribosomal protein L22
KJINAMHN_00612	CDS	690	rpsC		COG0092	30S ribosomal protein S3
KJINAMHN_00613	CDS	414	rplP		COG0197	50S ribosomal protein L16
KJINAMHN_00614	CDS	207	rpmC		COG0255	50S ribosomal protein L29
KJINAMHN_00615	CDS	267	rpsQ		COG0186	30S ribosomal protein S17
KJINAMHN_00616	CDS	369	rplN		COG0093	50S ribosomal protein L14
KJINAMHN_00617	CDS	342				hypothetical protein
KJINAMHN_00618	CDS	540	rplE		COG0094	50S ribosomal protein L5
KJINAMHN_00619	CDS	306	rpsN		COG0199	30S ribosomal protein S14
KJINAMHN_00620	CDS	396	rpsH		COG0096	30S ribosomal protein S8
KJINAMHN_00621	CDS	537	rplF		COG0097	50S ribosomal protein L6
KJINAMHN_00622	CDS	357	rplR		COG0256	50S ribosomal protein L18
KJINAMHN_00623	CDS	516	rpsE		COG0098	30S ribosomal protein S5
KJINAMHN_00624	CDS	180	rpmD		COG1841	50S ribosomal protein L30
KJINAMHN_00625	CDS	435	rplO		COG0200	50S ribosomal protein L15
KJINAMHN_00626	CDS	1422	secY		COG0201	Protein translocase subunit SecY
KJINAMHN_00627	CDS	357	rpsM		COG0099	30S ribosomal protein S13
KJINAMHN_00628	CDS	390	rpsK		COG0100	30S ribosomal protein S11
KJINAMHN_00629	CDS	624	rpsD		COG0522	30S ribosomal protein S4
KJINAMHN_00630	CDS	999	rpoA	2.7.7.6		DNA-directed RNA polymerase subunit alpha
KJINAMHN_00631	CDS	378	rplQ		COG0203	50S ribosomal protein L17
KJINAMHN_00632	CDS	936	ribF		COG0196	Bifunctional riboflavin kinase/FMN adenylyltransferase
KJINAMHN_00633	CDS	2847	ileS	6.1.1.5	COG0060	Isoleucine--tRNA ligase
KJINAMHN_00634	CDS	504	lspA	3.4.23.36		Lipoprotein signal peptidase
KJINAMHN_00635	CDS	942	ispH	1.17.7.4	COG0761	4-hydroxy-3-methylbut-2-enyl diphosphate reductase
KJINAMHN_00636	CDS	1110	asd	1.2.1.11	COG0136	Aspartate-semialdehyde dehydrogenase
KJINAMHN_00637	CDS	1071	leuB	1.1.1.85		3-isopropylmalate dehydrogenase
KJINAMHN_00638	CDS	456	dut	3.6.1.23	COG0756	Deoxyuridine 5'-triphosphate nucleotidohydrolase
KJINAMHN_00639	CDS	954				hypothetical protein
KJINAMHN_00640	CDS	1308	glmM	5.4.2.10	COG1109	Phosphoglucosamine mutase
KJINAMHN_00641	tRNA	76				tRNA-Arg(cct)
KJINAMHN_00642	CDS	1458	trkG		COG0168	Trk system potassium uptake protein TrkG
KJINAMHN_00643	CDS	1728	poxB	1.2.5.1	COG0028	Pyruvate dehydrogenase [ubiquinone]
KJINAMHN_00644	CDS	276				hypothetical protein
KJINAMHN_00645	CDS	2793	glnE		COG1391	Bifunctional glutamine synthetase adenylyltransferase/adenylyl-removing enzyme
KJINAMHN_00646	CDS	981	ispB	2.5.1.90	COG0142	Octaprenyl diphosphate synthase
KJINAMHN_00647	CDS	2037	recG	3.6.4.12	COG1200	ATP-dependent DNA helicase RecG
KJINAMHN_00648	CDS	399				hypothetical protein
KJINAMHN_00649	CDS	849	phzF	5.3.3.17		Trans-2,3-dihydro-3-hydroxyanthranilate isomerase
KJINAMHN_00650	CDS	3378				hypothetical protein
KJINAMHN_00651	CDS	783	sdhB	1.3.5.1	COG0479	Succinate dehydrogenase iron-sulfur subunit
KJINAMHN_00652	CDS	1803	sdhA	1.3.5.1		Succinate dehydrogenase flavoprotein subunit
KJINAMHN_00653	CDS	387				hypothetical protein
KJINAMHN_00654	CDS	390				hypothetical protein
KJINAMHN_00655	CDS	807				hypothetical protein
KJINAMHN_00656	CDS	849	prmC_1	2.1.1.297	COG2890	Release factor glutamine methyltransferase
KJINAMHN_00657	CDS	714				hypothetical protein
KJINAMHN_00658	CDS	207				hypothetical protein
KJINAMHN_00659	CDS	978	moaA_1	4.1.99.22	COG2896	GTP 3',8-cyclase
KJINAMHN_00660	CDS	873	oxyR			Hydrogen peroxide-inducible genes activator
KJINAMHN_00661	CDS	2835	sucA	1.2.4.2	COG0567	2-oxoglutarate dehydrogenase E1 component
KJINAMHN_00662	CDS	1206	sucB	2.3.1.61	COG0508	Dihydrolipoyllysine-residue succinyltransferase component of 2-oxoglutarate dehydrogenase complex
KJINAMHN_00663	CDS	1428	lpd	1.8.1.4		Dihydrolipoyl dehydrogenase
KJINAMHN_00664	CDS	1332	mepA_2		COG0534	Multidrug export protein MepA
KJINAMHN_00665	CDS	414	yqjF		COG2259	Inner membrane protein YqjF
KJINAMHN_00666	CDS	903	dmlR_1			HTH-type transcriptional regulator DmlR
KJINAMHN_00667	CDS	1107	ribD		COG0117	Riboflavin biosynthesis protein RibD
KJINAMHN_00668	CDS	624	ribE	2.5.1.9	COG0307	Riboflavin synthase
KJINAMHN_00669	CDS	1206	ribBA		COG0108	Riboflavin biosynthesis protein RibBA
KJINAMHN_00670	CDS	468	ribH	2.5.1.78	COG0054	6,7-dimethyl-8-ribityllumazine synthase
KJINAMHN_00671	CDS	630				hypothetical protein
KJINAMHN_00672	CDS	147				hypothetical protein
KJINAMHN_00673	CDS	564	yceI		COG2353	Protein YceI
KJINAMHN_00674	CDS	864				hypothetical protein
KJINAMHN_00675	CDS	900				hypothetical protein
KJINAMHN_00676	CDS	951	zntB			Zinc transport protein ZntB
KJINAMHN_00677	CDS	861	corA_1		COG0598	Cobalt/magnesium transport protein CorA
KJINAMHN_00678	CDS	603				hypothetical protein
KJINAMHN_00679	CDS	852	yfdC		COG2116	Inner membrane protein YfdC
KJINAMHN_00680	CDS	1005	yclQ		COG4607	Petrobactin-binding protein YclQ
KJINAMHN_00681	CDS	759	yclP	7.2.2.-	COG4604	Petrobactin import ATP-binding protein YclP
KJINAMHN_00682	CDS	948	yclO		COG4605	Petrobactin import system permease protein YclO
KJINAMHN_00683	CDS	1104	yclN		COG4606	Petrobactin import system permease protein YclN
KJINAMHN_00684	CDS	855	rhtA		COG5006	Threonine/homoserine exporter RhtA
KJINAMHN_00685	CDS	348				hypothetical protein
KJINAMHN_00686	CDS	336	gdnD		COG2076	putative guanidinium efflux system subunit GdnD
KJINAMHN_00687	CDS	321				hypothetical protein
KJINAMHN_00688	CDS	1572	abgT_4		COG2978	p-aminobenzoyl-glutamate transport protein
KJINAMHN_00689	CDS	1167	dnaJ		COG0484	Chaperone protein DnaJ
KJINAMHN_00690	CDS	1932	dnaK		COG0443	Chaperone protein DnaK
KJINAMHN_00691	CDS	711			COG0325	Pyridoxal phosphate homeostasis protein
KJINAMHN_00692	CDS	1380	ntrC		COG2204	DNA-binding transcriptional regulator NtrC
KJINAMHN_00693	CDS	2484	topA	5.6.2.1		DNA topoisomerase 1
KJINAMHN_00694	CDS	144				hypothetical protein
KJINAMHN_00695	CDS	369	dgkA	2.7.1.107	COG0818	Diacylglycerol kinase
KJINAMHN_00696	CDS	1029	tsaD	2.3.1.234	COG0533	tRNA N6-adenosine threonylcarbamoyltransferase
KJINAMHN_00697	CDS	1371	dgt	3.1.5.1	COG0232	Deoxyguanosinetriphosphate triphosphohydrolase
KJINAMHN_00698	CDS	1461	ccoN1	1.9.3.1	COG3278	Cbb3-type cytochrome c oxidase subunit CcoN1
KJINAMHN_00699	CDS	807				hypothetical protein
KJINAMHN_00700	CDS	267				hypothetical protein
KJINAMHN_00701	CDS	942	fixP		COG2010	Cbb3-type cytochrome c oxidase subunit FixP
KJINAMHN_00702	CDS	1410				hypothetical protein
KJINAMHN_00703	CDS	822				hypothetical protein
KJINAMHN_00704	CDS	2433	copA_1	7.2.2.8		putative copper-importing P-type ATPase A
KJINAMHN_00705	CDS	207				hypothetical protein
KJINAMHN_00706	CDS	291	gatC	6.3.5.-	COG0721	Glutamyl-tRNA(Gln) amidotransferase subunit C
KJINAMHN_00707	CDS	1446	gatA	6.3.5.7	COG0154	Glutamyl-tRNA(Gln) amidotransferase subunit A
KJINAMHN_00708	CDS	1428	gatB	6.3.5.-	COG0064	Aspartyl/glutamyl-tRNA(Asn/Gln) amidotransferase subunit B
KJINAMHN_00709	CDS	549				hypothetical protein
KJINAMHN_00710	CDS	2220	icd2	1.1.1.42		Isocitrate dehydrogenase [NADP] 2
KJINAMHN_00711	CDS	1260	gltS_1		COG0786	Sodium/glutamate symporter
KJINAMHN_00712	CDS	663	queC	6.3.4.20	COG0603	7-cyano-7-deazaguanine synthase
KJINAMHN_00713	CDS	426	queD	4.1.2.50	COG0720	6-carboxy-5,6,7,8-tetrahydropterin synthase
KJINAMHN_00714	CDS	708	queE	4.3.99.3	COG0602	7-carboxy-7-deazaguanine synthase
KJINAMHN_00715	CDS	1413	glnA	6.3.1.2	COG0174	Glutamine synthetase
KJINAMHN_00716	CDS	336				hypothetical protein
KJINAMHN_00717	CDS	684	ygaZ		COG1296	Inner membrane protein YgaZ
KJINAMHN_00718	CDS	936	lysO		COG2431	Lysine exporter LysO
KJINAMHN_00719	CDS	1356	proP_2			Proline/betaine transporter
KJINAMHN_00720	CDS	285	trpR			Trp operon repressor
KJINAMHN_00721	CDS	969				hypothetical protein
KJINAMHN_00722	CDS	846				hypothetical protein
KJINAMHN_00723	CDS	768	btuD	7.6.2.8		Vitamin B12 import ATP-binding protein BtuD
KJINAMHN_00724	CDS	939				hypothetical protein
KJINAMHN_00725	CDS	792	panB	2.1.2.11	COG0413	3-methyl-2-oxobutanoate hydroxymethyltransferase
KJINAMHN_00726	CDS	828	panC	6.3.2.1		Pantothenate synthetase
KJINAMHN_00727	CDS	432	mopA		COG2005	Molybdenum-pterin-binding protein MopA
KJINAMHN_00728	CDS	699	nlpD			Murein hydrolase activator NlpD
KJINAMHN_00729	CDS	2322	maeB	1.1.1.40	COG0280	NADP-dependent malic enzyme
KJINAMHN_00730	CDS	867	rpoH		COG0568	RNA polymerase sigma factor RpoH
KJINAMHN_00731	CDS	603				hypothetical protein
KJINAMHN_00732	CDS	1338	garB	1.8.1.16		Glutathione amide reductase
KJINAMHN_00733	CDS	1467	pitA_2		COG0306	Low-affinity inorganic phosphate transporter 1
KJINAMHN_00734	CDS	561	tsaC	2.7.7.87	COG0009	Threonylcarbamoyl-AMP synthase
KJINAMHN_00735	CDS	516				hypothetical protein
KJINAMHN_00736	CDS	2028	cirA_1		COG4771	Colicin I receptor
KJINAMHN_00737	CDS	1083	adh	1.1.1.1	COG1063	Alcohol dehydrogenase
KJINAMHN_00738	CDS	2607	alaS	6.1.1.7	COG0013	Alanine--tRNA ligase
KJINAMHN_00739	CDS	666	leuD	4.2.1.33	COG0066	3-isopropylmalate dehydratase small subunit
KJINAMHN_00740	CDS	1401	leuC	4.2.1.33	COG0065	3-isopropylmalate dehydratase large subunit
KJINAMHN_00741	CDS	1110	proB	2.7.2.11		Glutamate 5-kinase
KJINAMHN_00742	CDS	2751	secA		COG0653	Protein translocase subunit SecA
KJINAMHN_00743	CDS	267	rpsT		COG0268	30S ribosomal protein S20
KJINAMHN_00744	CDS	774	metQ_1		COG1464	D-methionine-binding lipoprotein MetQ
KJINAMHN_00745	CDS	738				hypothetical protein
KJINAMHN_00746	CDS	1029	metN	3.6.3.-	COG1135	Methionine import ATP-binding protein MetN
KJINAMHN_00747	CDS	168	rpmG		COG0267	50S ribosomal protein L33
KJINAMHN_00748	CDS	237	rpmB		COG0227	50S ribosomal protein L28
KJINAMHN_00749	CDS	1038	pilT_2		COG2805	Twitching mobility protein
KJINAMHN_00750	CDS	672	rpe	5.1.3.1	COG0036	Ribulose-phosphate 3-epimerase
KJINAMHN_00751	CDS	1284	hemL	5.4.3.8	COG0001	Glutamate-1-semialdehyde 2,1-aminomutase
KJINAMHN_00752	CDS	315	rsfS			Ribosomal silencing factor RsfS
KJINAMHN_00753	CDS	471	rlmH	2.1.1.177	COG1576	Ribosomal RNA large subunit methyltransferase H
KJINAMHN_00754	CDS	1221	fabB	2.3.1.41		3-oxoacyl-[acyl-carrier-protein] synthase 1
KJINAMHN_00755	CDS	516	fabA	4.2.1.59	COG0764	3-hydroxydecanoyl-[acyl-carrier-protein] dehydratase
KJINAMHN_00756	CDS	1020	rfaC	2.-.-.-	COG0859	Lipopolysaccharide heptosyltransferase 1
KJINAMHN_00757	CDS	903	lpxP	2.3.1.242	COG1560	Lipid A biosynthesis palmitoleoyltransferase
KJINAMHN_00758	CDS	477	gpt	2.4.2.22	COG0503	Xanthine phosphoribosyltransferase
KJINAMHN_00759	CDS	1317	rimO	2.8.4.4	COG0621	Ribosomal protein S12 methylthiotransferase RimO
KJINAMHN_00760	CDS	2088				hypothetical protein
KJINAMHN_00761	CDS	510	lptE			LPS-assembly lipoprotein LptE
KJINAMHN_00762	CDS	438	dtd	3.1.1.96	COG1490	D-aminoacyl-tRNA deacylase
KJINAMHN_00763	CDS	1008	ruvB	3.6.4.12	COG2255	Holliday junction ATP-dependent DNA helicase RuvB
KJINAMHN_00764	CDS	957	nagZ	3.2.1.52	COG1472	Beta-hexosaminidase
KJINAMHN_00765	CDS	774				hypothetical protein
KJINAMHN_00766	CDS	852	nfo	3.1.21.2	COG0648	Endonuclease 4
KJINAMHN_00767	CDS	750	rsmJ	2.1.1.242		Ribosomal RNA small subunit methyltransferase J
KJINAMHN_00768	CDS	675		3.1.3.-	COG0637	Phosphorylated carbohydrates phosphatase
KJINAMHN_00769	CDS	561				hypothetical protein
KJINAMHN_00770	CDS	969	gshB_1	6.3.2.3	COG0189	Glutathione synthetase
KJINAMHN_00771	CDS	738	rsmE	2.1.1.193	COG1385	Ribosomal RNA small subunit methyltransferase E
KJINAMHN_00772	CDS	918	lpxL	2.3.1.241	COG1560	Lipid A biosynthesis lauroyltransferase
KJINAMHN_00773	CDS	753	mlaA		COG2853	Intermembrane phospholipid transport system lipoprotein MlaA
KJINAMHN_00774	CDS	774	yadH		COG0842	Inner membrane transport permease YadH
KJINAMHN_00775	CDS	951	yadG		COG1131	putative ABC transporter ATP-binding protein YadG
KJINAMHN_00776	CDS	1041				hypothetical protein
KJINAMHN_00777	CDS	1392	sasA_3	2.7.-.-		Adaptive-response sensory-kinase SasA
KJINAMHN_00778	CDS	681	cpxR_2		COG0745	Transcriptional regulatory protein CpxR
KJINAMHN_00779	CDS	1458	rpoN		COG1508	RNA polymerase sigma-54 factor
KJINAMHN_00780	CDS	621	plsY	2.3.1.15	COG0344	putative glycerol-3-phosphate acyltransferase
KJINAMHN_00781	CDS	1941	yoaA	3.6.4.12	COG1199	putative ATP-dependent DNA helicase YoaA
KJINAMHN_00782	CDS	762	mazG	3.6.1.8	COG1694	Nucleoside triphosphate pyrophosphohydrolase
KJINAMHN_00783	CDS	1269	xseA	3.1.11.6	COG1570	Exodeoxyribonuclease 7 large subunit
KJINAMHN_00784	CDS	381	ygiW		COG3111	Protein YgiW
KJINAMHN_00785	CDS	1203	ynfM			Inner membrane transport protein YnfM
KJINAMHN_00786	CDS	435	yqjC			Protein YqjC
KJINAMHN_00787	CDS	2178	uvrD_1	3.6.4.12	COG0210	DNA helicase II
KJINAMHN_00788	CDS	441	ndk	2.7.4.6		Nucleoside diphosphate kinase
KJINAMHN_00789	CDS	1116	rlmN	2.1.1.192	COG0820	Dual-specificity RNA methyltransferase RlmN
KJINAMHN_00790	CDS	732	bepA_1	3.4.-.-		Beta-barrel assembly-enhancing protease
KJINAMHN_00791	CDS	1005	rodZ		COG1426	Cytoskeleton protein RodZ
KJINAMHN_00792	CDS	1278	hisS	6.1.1.21	COG0124	Histidine--tRNA ligase
KJINAMHN_00793	CDS	618				hypothetical protein
KJINAMHN_00794	CDS	1149	bamB		COG1520	Outer membrane protein assembly factor BamB
KJINAMHN_00795	CDS	1455	der_2		COG1160	GTPase Der
KJINAMHN_00796	CDS	1791	glmS_1	2.6.1.16	COG0449	Glutamine--fructose-6-phosphate aminotransferase [isomerizing]
KJINAMHN_00797	CDS	816	tnsA			Transposon Tn7 transposition protein TnsA
KJINAMHN_00798	CDS	2103	tnsB			Transposon Tn7 transposition protein TnsB
KJINAMHN_00799	CDS	1677	tnsC			Transposon Tn7 transposition protein TnsC
KJINAMHN_00800	CDS	1557				hypothetical protein
KJINAMHN_00801	CDS	1563	tnsE			Transposon Tn7 transposition protein TnsE
KJINAMHN_00802	CDS	2142	apxIB_1		COG2274	Toxin RTX-I translocation ATP-binding protein
KJINAMHN_00803	CDS	1434	ltxD_1			Leukotoxin export protein LtxD
KJINAMHN_00804	CDS	984				hypothetical protein
KJINAMHN_00805	tRNA	76				tRNA-Glu(ttc)
KJINAMHN_00806	tRNA	76				tRNA-Ala(ggc)
KJINAMHN_00807	tRNA	76				tRNA-Glu(ttc)
KJINAMHN_00808	CDS	516				hypothetical protein
KJINAMHN_00809	CDS	372	walR		COG0745	Transcriptional regulatory protein WalR
KJINAMHN_00810	CDS	1506				hypothetical protein
KJINAMHN_00811	CDS	1779				hypothetical protein
KJINAMHN_00812	CDS	792	mlaF	3.6.3.-	COG1127	Intermembrane phospholipid transport system ATP-binding protein MlaF
KJINAMHN_00813	CDS	777	mlaE		COG0767	Intermembrane phospholipid transport system permease protein MlaE
KJINAMHN_00814	CDS	1662				hypothetical protein
KJINAMHN_00815	CDS	1515	fumA	4.2.1.2	COG1838	Fumarate hydratase class I, aerobic
KJINAMHN_00816	CDS	825	ispE	2.7.1.148	COG1947	4-diphosphocytidyl-2-C-methyl-D-erythritol kinase
KJINAMHN_00817	CDS	552	lolB		COG3017	Outer-membrane lipoprotein LolB
KJINAMHN_00818	CDS	1419	plaP		COG0531	Low-affinity putrescine importer PlaP
KJINAMHN_00819	CDS	495				hypothetical protein
KJINAMHN_00820	CDS	774	yfcA		COG0730	putative membrane transporter protein YfcA
KJINAMHN_00821	CDS	546	ydjA	1.-.-.-	COG0778	Putative NAD(P)H nitroreductase YdjA
KJINAMHN_00822	CDS	2535	pepN	3.4.11.2	COG0308	Aminopeptidase N
KJINAMHN_00823	CDS	849	yrpC	5.1.1.3	COG0796	Glutamate racemase 2
KJINAMHN_00824	CDS	498	mraZ			Transcriptional regulator MraZ
KJINAMHN_00825	CDS	552				hypothetical protein
KJINAMHN_00826	CDS	459				hypothetical protein
KJINAMHN_00827	CDS	936				hypothetical protein
KJINAMHN_00828	CDS	855				hypothetical protein
KJINAMHN_00829	CDS	1455	mleN_2		COG1757	Malate-2H(+)/Na(+)-lactate antiporter
KJINAMHN_00830	CDS	1221	alaA	2.6.1.2	COG0436	Glutamate-pyruvate aminotransferase AlaA
KJINAMHN_00831	CDS	1008	trpGD		COG0512	Bifunctional protein TrpGD
KJINAMHN_00832	CDS	1374	trpC_1		COG0134	Tryptophan biosynthesis protein TrpCF
KJINAMHN_00833	CDS	1188	trpB	4.2.1.20	COG0133	Tryptophan synthase beta chain
KJINAMHN_00834	CDS	804	trpA	4.2.1.20		Tryptophan synthase alpha chain
KJINAMHN_00835	CDS	900				hypothetical protein
KJINAMHN_00836	CDS	1362				hypothetical protein
KJINAMHN_00837	CDS	1257	dadA1_1	1.4.99.-	COG0665	D-amino acid dehydrogenase 1
KJINAMHN_00838	CDS	1221	tyrP		COG0814	Tyrosine-specific transport protein
KJINAMHN_00839	CDS	1152	metC	4.4.1.13	COG0626	Cystathionine beta-lyase MetC
KJINAMHN_00840	CDS	1530	guaA_2	6.3.5.2		GMP synthase [glutamine-hydrolyzing]
KJINAMHN_00841	CDS	384				hypothetical protein
	repeat_region	510
KJINAMHN_00842	CDS	330				hypothetical protein
KJINAMHN_00843	CDS	483				hypothetical protein
KJINAMHN_00844	CDS	684				hypothetical protein
KJINAMHN_00845	CDS	1665	recN		COG0497	DNA repair protein RecN
KJINAMHN_00846	CDS	1617	nadE_1	6.3.5.1	COG0171	Glutamine-dependent NAD(+) synthetase
KJINAMHN_00847	CDS	702	yccA		COG0670	Modulator of FtsH protease YccA
KJINAMHN_00848	CDS	735				hypothetical protein
KJINAMHN_00849	CDS	1056	IMPDH	1.1.1.205		Inosine-5'-monophosphate dehydrogenase
KJINAMHN_00850	CDS	774	yjjV	3.1.-.-	COG0084	putative metal-dependent hydrolase YjjV
KJINAMHN_00851	CDS	1020	fieF			Ferrous-iron efflux pump FieF
KJINAMHN_00852	CDS	960	lipA	2.8.1.8	COG0320	Lipoyl synthase
KJINAMHN_00853	CDS	657	lipB	2.3.1.181	COG0321	Octanoyltransferase
KJINAMHN_00854	CDS	657	nth	4.2.99.18	COG0177	Endonuclease III
KJINAMHN_00855	CDS	633	rsxB	7.-.-.-		Ion-translocating oxidoreductase complex subunit B
KJINAMHN_00856	CDS	438				hypothetical protein
KJINAMHN_00857	CDS	273		2.8.1.-	COG0607	Sulfurtransferase
KJINAMHN_00858	CDS	321				hypothetical protein
KJINAMHN_00859	CDS	1077				hypothetical protein
KJINAMHN_00860	CDS	555				hypothetical protein
KJINAMHN_00861	CDS	318				hypothetical protein
KJINAMHN_00862	CDS	1014				hypothetical protein
KJINAMHN_00863	CDS	807	ydcV			Inner membrane ABC transporter permease protein YdcV
KJINAMHN_00864	CDS	1020	potH		COG1176	Putrescine transport system permease protein PotH
KJINAMHN_00865	CDS	1143	potA	7.6.2.11	COG3842	Spermidine/putrescine import ATP-binding protein PotA
KJINAMHN_00866	CDS	966	rsgA	3.6.1.-	COG1162	Small ribosomal subunit biogenesis GTPase RsgA
KJINAMHN_00867	CDS	324	fdxA		COG1146	Ferredoxin 1
KJINAMHN_00868	CDS	1200	tyrS	6.1.1.1	COG0162	Tyrosine--tRNA ligase
KJINAMHN_00869	CDS	993	erfK	2.-.-.-	COG1376	putative L,D-transpeptidase ErfK/SrfK
KJINAMHN_00870	CDS	252	fdx		COG1145	Ferredoxin
KJINAMHN_00871	CDS	1272	serS	6.1.1.11	COG0172	Serine--tRNA ligase
KJINAMHN_00872	CDS	1017	ccp	1.11.1.5	COG1858	Cytochrome c551 peroxidase
KJINAMHN_00873	CDS	600	tehB	2.1.1.-		putative S-adenosyl-L-methionine-dependent methyltransferase TehB
KJINAMHN_00874	CDS	1284	dctM		COG1593	C4-dicarboxylate TRAP transporter large permease protein DctM
KJINAMHN_00875	CDS	666	dctQ		COG3090	C4-dicarboxylate TRAP transporter small permease protein DctQ
KJINAMHN_00876	CDS	1017	dctP		COG1638	C4-dicarboxylate-binding periplasmic protein DctP
KJINAMHN_00877	CDS	249				hypothetical protein
KJINAMHN_00878	CDS	1239	sbcD		COG0420	Nuclease SbcCD subunit D
KJINAMHN_00879	CDS	3249	smc_2			Chromosome partition protein Smc
KJINAMHN_00880	CDS	432	mscL		COG1970	Large-conductance mechanosensitive channel
KJINAMHN_00881	CDS	411	yqaA		COG1238	Inner membrane protein YqaA
KJINAMHN_00882	CDS	1098				hypothetical protein
KJINAMHN_00883	CDS	759	nadE_2	6.3.1.5	COG0171	NH(3)-dependent NAD(+) synthetase
KJINAMHN_00884	CDS	1131	hemW		COG0635	Heme chaperone HemW
KJINAMHN_00885	CDS	1278		2.5.1.-	COG2873	O-acetyl-L-homoserine sulfhydrylase
KJINAMHN_00886	CDS	546		1.6.5.7		2-hydroxy-1,4-benzoquinone reductase
KJINAMHN_00887	CDS	1062	cobT	2.4.2.21		Nicotinate-nucleotide--dimethylbenzimidazole phosphoribosyltransferase
KJINAMHN_00888	CDS	624	rhtC		COG1280	Threonine efflux protein
KJINAMHN_00889	CDS	534				hypothetical protein
KJINAMHN_00890	CDS	1092				hypothetical protein
KJINAMHN_00891	CDS	816	apaH	3.6.1.41	COG0639	Bis(5'-nucleosyl)-tetraphosphatase, symmetrical
KJINAMHN_00892	CDS	441				hypothetical protein
KJINAMHN_00893	CDS	261				hypothetical protein
KJINAMHN_00894	CDS	2361	feoB		COG0370	Fe(2+) transporter FeoB
KJINAMHN_00895	CDS	240				hypothetical protein
KJINAMHN_00896	CDS	1038	corA_2		COG0598	Magnesium transport protein CorA
KJINAMHN_00897	CDS	414				hypothetical protein
KJINAMHN_00898	CDS	840				hypothetical protein
KJINAMHN_00899	CDS	726	artP	3.6.3.-	COG4161	Arginine transport ATP-binding protein ArtP
KJINAMHN_00900	CDS	738	artJ		COG0834	ABC transporter arginine-binding protein 1
KJINAMHN_00901	CDS	687	artQ		COG4215	Arginine ABC transporter permease protein ArtQ
KJINAMHN_00902	CDS	660	artM		COG4160	Arginine ABC transporter permease protein ArtM
KJINAMHN_00903	CDS	882	xerD		COG4974	Tyrosine recombinase XerD
KJINAMHN_00904	CDS	711				hypothetical protein
KJINAMHN_00905	CDS	858				hypothetical protein
KJINAMHN_00906	CDS	570	yhdE	3.6.1.9	COG0424	dTTP/UTP pyrophosphatase
KJINAMHN_00907	CDS	819	kdsA	2.5.1.55	COG2877	2-dehydro-3-deoxyphosphooctonate aldolase
KJINAMHN_00908	CDS	396	mgsA	4.2.3.3	COG1803	Methylglyoxal synthase
KJINAMHN_00909	CDS	330	bamE		COG2913	Outer membrane protein assembly factor BamE
KJINAMHN_00910	CDS	858	rnd	3.1.13.5	COG0349	Ribonuclease D
KJINAMHN_00911	CDS	198				hypothetical protein
KJINAMHN_00912	CDS	195				hypothetical protein
KJINAMHN_00913	CDS	1044	prfB		COG1186	Peptide chain release factor RF2
KJINAMHN_00914	CDS	507	tpx	1.11.1.15	COG2077	Thiol peroxidase
KJINAMHN_00915	CDS	324				Thioredoxin C-2
KJINAMHN_00916	CDS	1587	rhlB_1	3.6.4.13		ATP-dependent RNA helicase RhlB
KJINAMHN_00917	CDS	276				hypothetical protein
KJINAMHN_00918	CDS	1185				hypothetical protein
KJINAMHN_00919	CDS	498				hypothetical protein
KJINAMHN_00920	CDS	777	modE		COG2005	DNA-binding transcriptional dual regulator ModE
KJINAMHN_00921	CDS	636	tesA_1	3.1.2.2	COG2755	Thioesterase 1/protease 1/lysophospholipase L1
KJINAMHN_00922	CDS	1416	norG_1		COG1167	HTH-type transcriptional regulator NorG
KJINAMHN_00923	CDS	429				hypothetical protein
KJINAMHN_00924	CDS	693	ddpX_1	3.4.13.22		D-alanyl-D-alanine dipeptidase
KJINAMHN_00925	CDS	1215				hypothetical protein
KJINAMHN_00926	CDS	2262	yhgF		COG2183	Protein YhgF
KJINAMHN_00927	CDS	2520				hypothetical protein
KJINAMHN_00928	CDS	939	lacC	2.7.1.144		Tagatose-6-phosphate kinase
KJINAMHN_00929	CDS	1731	fruA		COG1299	PTS system fructose-specific EIIB'BC component
KJINAMHN_00930	CDS	543	dsbC		COG1651	Thiol:disulfide interchange protein DsbC
KJINAMHN_00931	CDS	1386	dbpA	3.6.4.13	COG0513	ATP-dependent RNA helicase DbpA
KJINAMHN_00932	CDS	1131	lldD	1.1.-.-	COG1304	L-lactate dehydrogenase
KJINAMHN_00933	CDS	2823				hypothetical protein
KJINAMHN_00934	CDS	1638	glcA		COG1620	Glycolate permease GlcA
KJINAMHN_00935	CDS	498	ogt	2.1.1.63	COG0350	Methylated-DNA--protein-cysteine methyltransferase, constitutive
KJINAMHN_00936	CDS	963	psaA		COG0803	Manganese ABC transporter substrate-binding lipoprotein
KJINAMHN_00937	CDS	1122				hypothetical protein
KJINAMHN_00938	CDS	906				hypothetical protein
KJINAMHN_00939	CDS	1104	agaAII	3.5.1.-	COG1820	N-acetylgalactosamine-6-phosphate deacetylase
KJINAMHN_00940	CDS	1020	glmS_2	2.6.1.16	COG0449	Glutamine--fructose-6-phosphate aminotransferase [isomerizing]
KJINAMHN_00941	CDS	891				hypothetical protein
KJINAMHN_00942	CDS	957	accA	2.1.3.15	COG0825	Acetyl-coenzyme A carboxylase carboxyl transferase subunit alpha
KJINAMHN_00943	CDS	1377	aroH	2.5.1.54	COG3200	Phospho-2-dehydro-3-deoxyheptonate aldolase
KJINAMHN_00944	CDS	1017	ilvC	1.1.1.86	COG0059	Ketol-acid reductoisomerase (NADP(+))
KJINAMHN_00945	CDS	522	ilvH	2.2.1.6	COG0440	Acetolactate synthase isozyme 3 small subunit
KJINAMHN_00946	CDS	1743	ilvI	2.2.1.6	COG0028	Acetolactate synthase isozyme 3 large subunit
KJINAMHN_00947	CDS	1302	hom	1.1.1.3	COG0460	Homoserine dehydrogenase
KJINAMHN_00948	CDS	681	elbB	4.2.1.-	COG3155	Glyoxalase ElbB
KJINAMHN_00949	CDS	1680	bepA_2	3.4.-.-		Beta-barrel assembly-enhancing protease
KJINAMHN_00950	CDS	1563				hypothetical protein
KJINAMHN_00951	CDS	3909	purL	6.3.5.3	COG0046	Phosphoribosylformylglycinamidine synthase
KJINAMHN_00952	CDS	414	yqgF	3.1.-.-	COG0816	Putative pre-16S rRNA nuclease
KJINAMHN_00953	CDS	1026	metN2	3.6.3.-	COG1135	Methionine import ATP-binding protein MetN 2
KJINAMHN_00954	CDS	690				hypothetical protein
KJINAMHN_00955	CDS	1179	ydbM	1.3.99.-		Putative acyl-CoA dehydrogenase YdbM
KJINAMHN_00956	CDS	816	metQ_2		COG1464	Methionine-binding lipoprotein MetQ
KJINAMHN_00957	CDS	816	metQ_3		COG1464	Methionine-binding lipoprotein MetQ
KJINAMHN_00958	CDS	807	yidA	3.1.3.23	COG0561	Sugar phosphatase YidA
KJINAMHN_00959	CDS	954	cas1	3.1.-.-		CRISPR-associated endonuclease Cas1
KJINAMHN_00960	CDS	3399	cas3	3.1.-.-		CRISPR-associated nuclease/helicase Cas3 subtype I-F/YPEST
KJINAMHN_00961	CDS	1251				hypothetical protein
KJINAMHN_00962	CDS	945	csy2			CRISPR-associated protein Csy2
KJINAMHN_00963	CDS	1065	csy3			CRISPR-associated protein Csy3
KJINAMHN_00964	CDS	603	cas6f_1	3.1.-.-		CRISPR-associated endonuclease Cas6/Csy4
KJINAMHN_00965	CDS	282				hypothetical protein
KJINAMHN_00966	CDS	300				hypothetical protein
KJINAMHN_00967	CDS	489	ssb_1		COG0629	Single-stranded DNA-binding protein
KJINAMHN_00968	CDS	165				hypothetical protein
KJINAMHN_00969	CDS	204				hypothetical protein
KJINAMHN_00970	CDS	663				hypothetical protein
KJINAMHN_00971	CDS	774				hypothetical protein
KJINAMHN_00972	CDS	147				hypothetical protein
KJINAMHN_00973	CDS	153				hypothetical protein
KJINAMHN_00974	CDS	159				hypothetical protein
KJINAMHN_00975	CDS	204				hypothetical protein
KJINAMHN_00976	CDS	264				hypothetical protein
KJINAMHN_00977	CDS	645	lexA	3.4.21.88		LexA repressor
KJINAMHN_00978	CDS	252				hypothetical protein
KJINAMHN_00979	CDS	873				hypothetical protein
KJINAMHN_00980	CDS	492				hypothetical protein
KJINAMHN_00981	CDS	303				hypothetical protein
KJINAMHN_00982	CDS	405				hypothetical protein
KJINAMHN_00983	CDS	510				hypothetical protein
KJINAMHN_00984	CDS	750				hypothetical protein
KJINAMHN_00985	tRNA	74				tRNA-Gly(tcc)
KJINAMHN_00986	tRNA	77				tRNA-Met(cat)
KJINAMHN_00987	CDS	678				hypothetical protein
KJINAMHN_00988	CDS	753				hypothetical protein
KJINAMHN_00989	CDS	399				hypothetical protein
KJINAMHN_00990	CDS	180				hypothetical protein
KJINAMHN_00991	CDS	495				hypothetical protein
KJINAMHN_00992	CDS	300				hypothetical protein
KJINAMHN_00993	CDS	330				hypothetical protein
KJINAMHN_00994	CDS	687				hypothetical protein
KJINAMHN_00995	CDS	1116				hypothetical protein
KJINAMHN_00996	CDS	255				hypothetical protein
KJINAMHN_00997	CDS	255				hypothetical protein
KJINAMHN_00998	CDS	321				hypothetical protein
KJINAMHN_00999	CDS	216				hypothetical protein
KJINAMHN_01000	CDS	474				hypothetical protein
KJINAMHN_01001	CDS	1266				hypothetical protein
KJINAMHN_01002	CDS	387				hypothetical protein
KJINAMHN_01003	CDS	351				hypothetical protein
KJINAMHN_01004	CDS	342				hypothetical protein
KJINAMHN_01005	CDS	324	hvrA			Trans-acting regulatory protein HvrA
KJINAMHN_01006	CDS	678				hypothetical protein
KJINAMHN_01007	CDS	558	cobO	2.5.1.-	COG2096	Cobalamin adenosyltransferase
KJINAMHN_01008	CDS	882	ubiA	2.5.1.39	COG0382	4-hydroxybenzoate octaprenyltransferase
KJINAMHN_01009	CDS	327				hypothetical protein
KJINAMHN_01010	CDS	933				hypothetical protein
KJINAMHN_01011	CDS	210				hypothetical protein
KJINAMHN_01012	CDS	930	rluC	5.4.99.24	COG0564	Ribosomal large subunit pseudouridine synthase C
KJINAMHN_01013	CDS	1053	recA			Protein RecA
KJINAMHN_01014	CDS	1413	hldE		COG2870	Bifunctional protein HldE
KJINAMHN_01015	CDS	783	ycfH	3.1.-.-	COG0084	putative metal-dependent hydrolase YcfH
KJINAMHN_01016	CDS	339				hypothetical protein
KJINAMHN_01017	CDS	4887	cheB_2	3.5.1.44		Protein-glutamate methylesterase/protein-glutamine glutaminase
KJINAMHN_01018	CDS	234				hypothetical protein
KJINAMHN_01019	CDS	1206				hypothetical protein
KJINAMHN_01020	CDS	459	cheW		COG0835	Chemotaxis protein CheW
KJINAMHN_01021	CDS	372	patA_2		COG0784	Protein PatA
KJINAMHN_01022	CDS	804	mntB_1		COG1121	Manganese transport system ATP-binding protein MntB
KJINAMHN_01023	CDS	867	mntB_2			Manganese transport system membrane protein MntB
KJINAMHN_01024	CDS	249	moaD		COG1977	Molybdopterin synthase sulfur carrier subunit
KJINAMHN_01025	CDS	459	moaE	2.8.1.12	COG0314	Molybdopterin synthase catalytic subunit
KJINAMHN_01026	CDS	600	mobA	2.7.7.77	COG0746	Molybdenum cofactor guanylyltransferase
KJINAMHN_01027	CDS	1182	moeA	2.10.1.1	COG0303	Molybdopterin molybdenumtransferase
KJINAMHN_01028	CDS	630	rsmG	2.1.1.170	COG0357	Ribosomal RNA small subunit methyltransferase G
KJINAMHN_01029	CDS	774	parA			Chromosome partitioning protein ParA
KJINAMHN_01030	CDS	897	parB		COG1475	putative chromosome-partitioning protein ParB
KJINAMHN_01031	CDS	348				hypothetical protein
KJINAMHN_01032	CDS	816	atpB		COG0356	ATP synthase subunit a
KJINAMHN_01033	CDS	234	atpH_1			ATP synthase subunit c
KJINAMHN_01034	CDS	471	atpF		COG0711	ATP synthase subunit b
KJINAMHN_01035	CDS	555	atpH_2		COG0712	ATP synthase subunit delta
KJINAMHN_01036	CDS	1548	atpA	7.1.2.2		ATP synthase subunit alpha
KJINAMHN_01037	CDS	912	atpG		COG0224	ATP synthase gamma chain
KJINAMHN_01038	CDS	1374	atpD	7.1.2.2	COG0055	ATP synthase subunit beta
KJINAMHN_01039	CDS	423	atpC		COG0355	ATP synthase epsilon chain
KJINAMHN_01040	CDS	1215	sstT		COG3633	Serine/threonine transporter SstT
KJINAMHN_01041	CDS	723				hypothetical protein
KJINAMHN_01042	CDS	729				hypothetical protein
KJINAMHN_01043	tRNA	89				tRNA-Leu(taa)
KJINAMHN_01044	CDS	1395				hypothetical protein
KJINAMHN_01045	CDS	2166	apxIB_2		COG2274	Toxin RTX-I translocation ATP-binding protein
KJINAMHN_01046	CDS	1224	prsE			Type I secretion system membrane fusion protein PrsE
KJINAMHN_01047	CDS	561				hypothetical protein
KJINAMHN_01048	CDS	693	phoB		COG0745	Phosphate regulon transcriptional regulatory protein PhoB
KJINAMHN_01049	CDS	1287	phoR	2.7.13.3		Phosphate regulon sensor protein PhoR
KJINAMHN_01050	CDS	1032	pstS		COG0226	Phosphate-binding protein PstS
KJINAMHN_01051	CDS	960	pstC		COG0573	Phosphate transport system permease protein PstC
KJINAMHN_01052	CDS	861	pstA		COG0581	Phosphate transport system permease protein PstA
KJINAMHN_01053	CDS	771	pstB	7.3.2.1	COG1117	Phosphate import ATP-binding protein PstB
KJINAMHN_01054	CDS	720	phoU		COG0704	Phosphate-specific transport system accessory protein PhoU
KJINAMHN_01055	CDS	129				hypothetical protein
KJINAMHN_01056	CDS	645				hypothetical protein
KJINAMHN_01057	CDS	768	yhhW	1.13.11.24	COG1741	Quercetin 2,3-dioxygenase
KJINAMHN_01058	CDS	834	bioP		COG0697	Biotin transporter
KJINAMHN_01059	CDS	1563	murJ		COG0728	putative lipid II flippase MurJ
KJINAMHN_01060	CDS	477	luxS	4.4.1.21	COG1854	S-ribosylhomocysteine lyase
KJINAMHN_01061	CDS	1494	comM		COG0606	Competence protein ComM
KJINAMHN_01062	CDS	852	pdxS	4.3.3.6		Pyridoxal 5'-phosphate synthase subunit PdxS
KJINAMHN_01063	CDS	1392	norG_2		COG1167	HTH-type transcriptional regulator NorG
KJINAMHN_01064	CDS	705			COG0500	putative protein
KJINAMHN_01065	CDS	642	tenA	3.5.99.2	COG0819	Aminopyrimidine aminohydrolase
KJINAMHN_01066	CDS	681	bioD1	6.3.3.3	COG0132	ATP-dependent dethiobiotin synthetase BioD 1
KJINAMHN_01067	CDS	1356	bioA	2.6.1.62		Adenosylmethionine-8-amino-7-oxononanoate aminotransferase
KJINAMHN_01068	CDS	504	slyB_2		COG3133	Outer membrane lipoprotein SlyB
KJINAMHN_01069	CDS	576				hypothetical protein
KJINAMHN_01070	CDS	252	yedF		COG0425	Putative sulfur carrier protein YedF
KJINAMHN_01071	CDS	1233				hypothetical protein
KJINAMHN_01072	CDS	1389	alsT_1		COG1115	Amino-acid carrier protein AlsT
KJINAMHN_01073	CDS	231	yccJ			putative protein YccJ
KJINAMHN_01074	CDS	2100	metG	6.1.1.10	COG0073	Methionine--tRNA ligase
KJINAMHN_01075	CDS	480	ispF	4.6.1.12	COG0245	2-C-methyl-D-erythritol 2,4-cyclodiphosphate synthase
KJINAMHN_01076	CDS	699	ispD	2.7.7.60		2-C-methyl-D-erythritol 4-phosphate cytidylyltransferase
KJINAMHN_01077	CDS	438	uspA2		COG0589	Universal stress protein A
KJINAMHN_01078	CDS	444				hypothetical protein
KJINAMHN_01079	CDS	1194	acrA			Multidrug efflux pump subunit AcrA
KJINAMHN_01080	CDS	3189	acrB		COG0841	Multidrug efflux pump subunit AcrB
KJINAMHN_01081	CDS	852				hypothetical protein
KJINAMHN_01082	CDS	396				hypothetical protein
KJINAMHN_01083	CDS	276				hypothetical protein
KJINAMHN_01084	CDS	1377	cysS	6.1.1.16	COG0215	Cysteine--tRNA ligase
KJINAMHN_01085	CDS	1614				hypothetical protein
KJINAMHN_01086	CDS	576	ahpC	1.11.1.15	COG0450	Alkyl hydroperoxide reductase C
KJINAMHN_01087	CDS	927	xerC		COG4973	Tyrosine recombinase XerC
KJINAMHN_01088	CDS	369	hslR		COG1188	Heat shock protein 15
KJINAMHN_01089	CDS	339	minE			Cell division topological specificity factor
KJINAMHN_01090	CDS	810	minD		COG2894	Septum site-determining protein MinD
KJINAMHN_01091	CDS	741	minC		COG0850	Septum site-determining protein MinC
KJINAMHN_01092	CDS	486	slyD	5.2.1.8	COG1047	FKBP-type peptidyl-prolyl cis-trans isomerase SlyD
KJINAMHN_01093	CDS	660	rpiA	5.3.1.6		Ribose-5-phosphate isomerase A
KJINAMHN_01094	CDS	588	lptC			Lipopolysaccharide export system protein LptC
KJINAMHN_01095	CDS	501	lptA		COG1934	Lipopolysaccharide export system protein LptA
KJINAMHN_01096	CDS	723	lptB	3.6.3.-	COG1137	Lipopolysaccharide export system ATP-binding protein LptB
KJINAMHN_01097	CDS	1413	sbcB	3.1.11.1	COG2925	Exodeoxyribonuclease I
KJINAMHN_01098	CDS	843				hypothetical protein
KJINAMHN_01099	CDS	975				hypothetical protein
KJINAMHN_01100	CDS	690	pyrE_1	2.4.2.10		Orotate phosphoribosyltransferase
KJINAMHN_01101	CDS	588		6.3.3.2	COG0212	5-formyltetrahydrofolate cyclo-ligase
KJINAMHN_01102	CDS	519	ompA			Outer membrane protein A
KJINAMHN_01103	CDS	1761	msbA	7.5.2.6	COG1132	Lipid A export ATP-binding/permease protein MsbA
KJINAMHN_01104	CDS	522	pal		COG2885	Peptidoglycan-associated lipoprotein
KJINAMHN_01105	CDS	1257	tolB		COG0823	Tol-Pal system protein TolB
KJINAMHN_01106	CDS	555	hpt	2.4.2.8		Hypoxanthine-guanine phosphoribosyltransferase
KJINAMHN_01107	CDS	1278	hemA	1.2.1.70	COG0373	Glutamyl-tRNA reductase
KJINAMHN_01108	CDS	1092	mshA	2.4.1.250		D-inositol-3-phosphate glycosyltransferase
KJINAMHN_01109	CDS	477				hypothetical protein
KJINAMHN_01110	CDS	582	gmhA	5.3.1.28	COG0279	Phosphoheptose isomerase
KJINAMHN_01111	CDS	1473	ubiD	4.1.1.98	COG0043	3-octaprenyl-4-hydroxybenzoate carboxy-lyase
KJINAMHN_01112	CDS	603		3.2.2.-	COG1611	Putative cytokinin riboside 5'-monophosphate phosphoribohydrolase
KJINAMHN_01113	CDS	543	orn	3.1.-.-	COG1949	Oligoribonuclease
KJINAMHN_01114	CDS	498	pgpA	3.1.3.27	COG1267	Phosphatidylglycerophosphatase A
KJINAMHN_01115	CDS	621				hypothetical protein
KJINAMHN_01116	CDS	615				hypothetical protein
KJINAMHN_01117	CDS	1119				hypothetical protein
KJINAMHN_01118	CDS	786	mkl		COG1127	putative ribonucleotide transport ATP-binding protein mkl
KJINAMHN_01119	CDS	942				hypothetical protein
KJINAMHN_01120	CDS	588				hypothetical protein
KJINAMHN_01121	CDS	891				hypothetical protein
KJINAMHN_01122	CDS	432		2.3.1.-		Acetyltransferase
KJINAMHN_01123	CDS	684	ung	3.2.2.27	COG0692	Uracil-DNA glycosylase
KJINAMHN_01124	CDS	1296	wecA	2.7.8.40		UDP-N-acetylgalactosamine-undecaprenyl-phosphate N-acetylgalactosaminephosphotransferase
KJINAMHN_01125	CDS	1074				hypothetical protein
KJINAMHN_01126	CDS	1239				hypothetical protein
KJINAMHN_01127	CDS	1080	rfaB	2.4.1.-	COG0438	Lipopolysaccharide 1,6-galactosyltransferase
KJINAMHN_01128	CDS	1119	sacA_1	5.1.3.14		UDP-N-acetylglucosamine 2-epimerase
KJINAMHN_01129	CDS	1125				hypothetical protein
KJINAMHN_01130	CDS	1143	pglA	2.4.1.290		N,N'-diacetylbacillosaminyl-diphospho-undecaprenol alpha-1,3-N-acetylgalactosaminyltransferase
KJINAMHN_01131	CDS	873	galU	2.7.7.9	COG1210	UTP--glucose-1-phosphate uridylyltransferase
KJINAMHN_01132	CDS	1170	tuaD	1.1.1.22	COG1004	UDP-glucose 6-dehydrogenase TuaD
KJINAMHN_01133	CDS	1626	pgi	5.3.1.9	COG0166	Glucose-6-phosphate isomerase
KJINAMHN_01134	CDS	1017	galE	5.1.3.2	COG1087	UDP-glucose 4-epimerase
KJINAMHN_01135	CDS	1368	algC	5.4.2.2	COG1109	Phosphomannomutase/phosphoglucomutase
KJINAMHN_01136	CDS	1290	fepE		COG3765	Ferric enterobactin transport protein FepE
KJINAMHN_01137	CDS	2745	polA	2.7.7.7	COG0258	DNA polymerase I
KJINAMHN_01138	CDS	345	yfdG		COG2246	Prophage bactoprenol-linked glucose translocase
KJINAMHN_01139	CDS	942	yfdH	2.4.1.-	COG0463	Prophage bactoprenol glucosyl transferase
KJINAMHN_01140	CDS	1437				hypothetical protein
KJINAMHN_01141	CDS	768	xthA	3.1.11.2	COG0708	Exodeoxyribonuclease III
KJINAMHN_01142	CDS	873	dapA	4.3.3.7	COG0329	4-hydroxy-tetrahydrodipicolinate synthase
KJINAMHN_01143	CDS	1047	bamC			Outer membrane protein assembly factor BamC
KJINAMHN_01144	CDS	1851	mutL			DNA mismatch repair protein MutL
KJINAMHN_01145	CDS	819	aroE	1.1.1.25	COG0169	Shikimate dehydrogenase (NADP(+))
KJINAMHN_01146	CDS	750	ubiE	2.1.1.163	COG2226	Ubiquinone/menaquinone biosynthesis C-methyltransferase UbiE
KJINAMHN_01147	CDS	1626	ubiB	2.7.-.-	COG0661	putative protein kinase UbiB
KJINAMHN_01148	CDS	432				Cytochrome c'
KJINAMHN_01149	CDS	1098	spuE		COG0687	Spermidine-binding periplasmic protein SpuE
KJINAMHN_01150	CDS	345				hypothetical protein
KJINAMHN_01151	CDS	1233				hypothetical protein
KJINAMHN_01152	CDS	531				hypothetical protein
KJINAMHN_01153	CDS	651				hypothetical protein
KJINAMHN_01154	CDS	363				hypothetical protein
KJINAMHN_01155	CDS	954	trxB	1.8.1.9	COG0492	Thioredoxin reductase
KJINAMHN_01156	CDS	1176	pgk	2.7.2.3	COG0126	Phosphoglycerate kinase
KJINAMHN_01157	CDS	1524	rng	3.1.26.-	COG1530	Ribonuclease G
KJINAMHN_01158	CDS	1203	coaBC		COG0452	Coenzyme A biosynthesis bifunctional protein CoaBC
KJINAMHN_01159	CDS	1161				hypothetical protein
KJINAMHN_01160	CDS	981	gpsA	1.1.1.94	COG0240	Glycerol-3-phosphate dehydrogenase [NAD(P)+]
KJINAMHN_01161	CDS	180				hypothetical protein
KJINAMHN_01162	CDS	660	menH_3	4.2.99.20		2-succinyl-6-hydroxy-2,4-cyclohexadiene-1-carboxylate synthase
KJINAMHN_01163	CDS	810	metQ_4		COG1464	putative D-methionine-binding lipoprotein MetQ
KJINAMHN_01164	CDS	1008	vldW	1.14.11.52		Validamycin A dioxygenase
KJINAMHN_01165	CDS	1824		3.6.3.-	COG1132	Putative multidrug export ATP-binding/permease protein
KJINAMHN_01166	CDS	1512	ilvA	4.3.1.19	COG1171	L-threonine dehydratase biosynthetic IlvA
KJINAMHN_01167	CDS	519	nadR_2		COG1056	Bifunctional NAD biosynthesis protein NadR
KJINAMHN_01168	CDS	1479	ywiE	2.7.8.-	COG1502	putative cardiolipin synthase YwiE
KJINAMHN_01169	CDS	243				hypothetical protein
KJINAMHN_01170	CDS	2244	nrdA	1.17.4.1	COG0209	Ribonucleoside-diphosphate reductase 1 subunit alpha
KJINAMHN_01171	CDS	1107	nrdB	1.17.4.1	COG0208	Ribonucleoside-diphosphate reductase 1 subunit beta
KJINAMHN_01172	CDS	246				hypothetical protein
KJINAMHN_01173	CDS	480				hypothetical protein
KJINAMHN_01174	CDS	603	pnuC_2		COG3201	Nicotinamide riboside transporter PnuC
KJINAMHN_01175	CDS	648				hypothetical protein
KJINAMHN_01176	CDS	678				hypothetical protein
KJINAMHN_01177	CDS	972	panS		COG0385	Pantothenate precursors transporter PanS
KJINAMHN_01178	CDS	315	rplU		COG0261	50S ribosomal protein L21
KJINAMHN_01179	CDS	261	rpmA		COG0211	50S ribosomal protein L27
KJINAMHN_01180	CDS	1068	obg	3.6.5.-		GTPase Obg
KJINAMHN_01181	CDS	438				hypothetical protein
KJINAMHN_01182	CDS	1305	aroP		COG1113	Aromatic amino acid transport protein AroP
KJINAMHN_01183	CDS	1920	rlhA		COG0826	23S rRNA 5-hydroxycytidine synthase
KJINAMHN_01184	tRNA	74				tRNA-Val(tac)
KJINAMHN_01185	CDS	342				hypothetical protein
KJINAMHN_01186	CDS	2217				hypothetical protein
KJINAMHN_01187	CDS	1080	fic	2.7.7.-	COG3177	Protein adenylyltransferase SoFic
KJINAMHN_01188	tRNA	90				tRNA-Ser(tga)
KJINAMHN_01189	CDS	570	trpC_2		COG0134	Tryptophan biosynthesis protein TrpCF
KJINAMHN_01190	CDS	393				hypothetical protein
KJINAMHN_01191	CDS	1494	mqo	1.1.5.4	COG0579	Malate:quinone oxidoreductase
KJINAMHN_01192	CDS	420				hypothetical protein
KJINAMHN_01193	CDS	411				hypothetical protein
KJINAMHN_01194	CDS	1959	macB	3.6.3.-	COG0577	Macrolide export ATP-binding/permease protein MacB
KJINAMHN_01195	CDS	1209	macA		COG0845	Macrolide export protein MacA
KJINAMHN_01196	CDS	1527	lnt	2.3.1.269	COG0815	Apolipoprotein N-acyltransferase
KJINAMHN_01197	CDS	1149	yfeW	3.4.16.4	COG1680	Putative D-alanyl-D-alanine carboxypeptidase
KJINAMHN_01198	tRNA	76				tRNA-Phe(gaa)
KJINAMHN_01199	tRNA	76				tRNA-Phe(gaa)
KJINAMHN_01200	tmRNA	354	ssrA			transfer-messenger RNA, SsrA
KJINAMHN_01201	CDS	1608	prmC_2	2.1.1.297		Release factor glutamine methyltransferase
KJINAMHN_01202	CDS	1191				hypothetical protein
KJINAMHN_01203	CDS	447				hypothetical protein
KJINAMHN_01204	CDS	288				hypothetical protein
KJINAMHN_01205	CDS	2769	hsdR_1	3.1.21.3		Type-1 restriction enzyme R protein
KJINAMHN_01206	CDS	744				hypothetical protein
KJINAMHN_01207	CDS	774				hypothetical protein
KJINAMHN_01208	CDS	309				hypothetical protein
KJINAMHN_01209	CDS	1242				hypothetical protein
KJINAMHN_01210	CDS	762	yejK			Nucleoid-associated protein YejK
KJINAMHN_01211	CDS	1374	phrB	4.1.99.3	COG0415	Deoxyribodipyrimidine photo-lyase
KJINAMHN_01212	CDS	684	rnhA_1	3.1.26.4		Ribonuclease H
KJINAMHN_01213	CDS	849				hypothetical protein
KJINAMHN_01214	CDS	360				hypothetical protein
KJINAMHN_01215	CDS	759				hypothetical protein
KJINAMHN_01216	CDS	492	rutF	1.5.1.42	COG1853	FMN reductase (NADH) RutF
KJINAMHN_01217	CDS	1032	xecA1	4.4.1.23		2-hydroxypropyl-CoM lyase
KJINAMHN_01218	CDS	978				hypothetical protein
KJINAMHN_01219	CDS	1143				hypothetical protein
KJINAMHN_01220	CDS	1350	dat	2.6.1.76	COG0160	Diaminobutyrate--2-oxoglutarate aminotransferase
KJINAMHN_01221	CDS	1440	ddc	4.1.1.86	COG0076	L-2,4-diaminobutyrate decarboxylase
KJINAMHN_01222	CDS	489				hypothetical protein
KJINAMHN_01223	CDS	645	mtcA2	4.2.1.1	COG0288	Carbonic anhydrase 2
KJINAMHN_01224	CDS	1791	rep_1	3.6.4.12		ATP-dependent DNA helicase Rep
KJINAMHN_01225	CDS	576	ybiX	1.14.11.-		PKHD-type hydroxylase YbiX
KJINAMHN_01226	CDS	165				hypothetical protein
KJINAMHN_01227	CDS	1539	actP_2		COG4147	Cation/acetate symporter ActP
KJINAMHN_01228	CDS	348				hypothetical protein
KJINAMHN_01229	CDS	663				hypothetical protein
KJINAMHN_01230	CDS	336				hypothetical protein
KJINAMHN_01231	CDS	1041				hypothetical protein
KJINAMHN_01232	CDS	231	yeeD		COG0425	Putative sulfur carrier protein YeeD
KJINAMHN_01233	CDS	1308	ttuB			Putative tartrate transporter
KJINAMHN_01234	CDS	540	blc		COG3040	Outer membrane lipoprotein Blc
KJINAMHN_01235	CDS	1410	patA_3	2.3.1.-	COG1696	Peptidoglycan O-acetyltransferase
KJINAMHN_01236	CDS	1065				hypothetical protein
KJINAMHN_01237	CDS	1215				hypothetical protein
KJINAMHN_01238	CDS	1893	mnmG		COG0445	tRNA uridine 5-carboxymethylaminomethyl modification enzyme MnmG
KJINAMHN_01239	CDS	2514				hypothetical protein
KJINAMHN_01240	CDS	240	sdhE		COG2938	FAD assembly factor SdhE
KJINAMHN_01241	CDS	894	prmA	2.1.1.-	COG2264	Ribosomal protein L11 methyltransferase
KJINAMHN_01242	CDS	966	dusB	1.3.1.-	COG0042	tRNA-dihydrouridine synthase B
KJINAMHN_01243	CDS	270	fis		COG2901	DNA-binding protein Fis
KJINAMHN_01244	CDS	648	can	4.2.1.1	COG0288	Carbonic anhydrase 2
KJINAMHN_01245	CDS	564	yeiP		COG0231	Elongation factor P-like protein
KJINAMHN_01246	CDS	1404	alsT_2		COG1115	Amino-acid carrier protein AlsT
KJINAMHN_01247	CDS	879	pflA	1.97.1.4	COG1180	Pyruvate formate-lyase 1-activating enzyme
KJINAMHN_01248	CDS	2250	pflB	2.3.1.54		Formate acetyltransferase
KJINAMHN_01249	CDS	483				hypothetical protein
KJINAMHN_01250	CDS	1353	yeeO		COG0534	putative FMN/FAD exporter YeeO
KJINAMHN_01251	CDS	246				hypothetical protein
KJINAMHN_01252	CDS	1194	hipO_2	3.5.1.32	COG1473	Hippurate hydrolase
KJINAMHN_01253	CDS	2592	mutS		COG0249	DNA mismatch repair protein MutS
KJINAMHN_01254	CDS	1560				hypothetical protein
KJINAMHN_01255	CDS	837	hslO		COG1281	33 kDa chaperonin
KJINAMHN_01256	CDS	639	ubiX	2.5.1.129	COG0163	Flavin prenyltransferase UbiX
KJINAMHN_01257	CDS	933				hypothetical protein
KJINAMHN_01258	CDS	921	zipA			Cell division protein ZipA
KJINAMHN_01259	CDS	2025	ligA_1	6.5.1.2	COG0272	DNA ligase
KJINAMHN_01260	CDS	681	trmO	2.1.1.-	COG1720	tRNA (adenine(37)-N6)-methyltransferase
KJINAMHN_01261	CDS	501	hutX		COG3721	Intracellular heme transport protein HutX
KJINAMHN_01262	CDS	609	hutZ	1.14.99.58	COG0748	Heme oxygenase HutZ
KJINAMHN_01263	CDS	2583	leuS	6.1.1.4		Leucine--tRNA ligase
KJINAMHN_01264	CDS	1278	ampG		COG0477	Anhydromuropeptide permease
KJINAMHN_01265	CDS	525	speG	2.3.1.57	COG1670	Spermidine N(1)-acetyltransferase
KJINAMHN_01266	CDS	687				hypothetical protein
KJINAMHN_01267	tRNA	77				tRNA-Met(cat)
KJINAMHN_01268	tRNA	77				tRNA-Val(gac)
KJINAMHN_01269	CDS	966	ppsC	2.3.1.41		Phthiocerol synthesis polyketide synthase type I PpsC
KJINAMHN_01270	CDS	834	ttcA	2.8.1.-	COG0037	tRNA-cytidine(32) 2-sulfurtransferase
KJINAMHN_01271	CDS	762	moeB	2.7.7.80	COG0476	Molybdopterin-synthase adenylyltransferase
KJINAMHN_01272	CDS	1509	iscS_2	2.8.1.7		Cysteine desulfurase IscS
KJINAMHN_01273	CDS	591	pgsA	2.7.8.5	COG0558	CDP-diacylglycerol--glycerol-3-phosphate 3-phosphatidyltransferase
KJINAMHN_01274	CDS	699	hisM		COG4160	Histidine transport system permease protein HisM
KJINAMHN_01275	CDS	729	hisQ		COG4215	Histidine transport system permease protein HisQ
KJINAMHN_01276	CDS	1650	glnS	6.1.1.18	COG0008	Glutamine--tRNA ligase
KJINAMHN_01277	CDS	2049	sthA	1.6.1.1		Soluble pyridine nucleotide transhydrogenase
KJINAMHN_01278	CDS	1308	aceF	2.3.1.12	COG0508	Dihydrolipoyllysine-residue acetyltransferase component of pyruvate dehydrogenase complex
KJINAMHN_01279	CDS	2676	aceE	1.2.4.1	COG2609	Pyruvate dehydrogenase E1 component
KJINAMHN_01280	CDS	1233				hypothetical protein
KJINAMHN_01281	CDS	1377	pepA_2	3.4.11.10		cytosol aminopeptidase
KJINAMHN_01282	CDS	3615				hypothetical protein
KJINAMHN_01283	CDS	2844	secD			Protein translocase subunit SecD
KJINAMHN_01284	CDS	417				hypothetical protein
KJINAMHN_01285	CDS	1974	tktA	2.2.1.1	COG0021	Transketolase 1
KJINAMHN_01286	CDS	600				hypothetical protein
KJINAMHN_01287	CDS	1401				hypothetical protein
KJINAMHN_01288	CDS	339				hypothetical protein
KJINAMHN_01289	CDS	528	dps	1.16.-.-		DNA protection during starvation protein
KJINAMHN_01290	CDS	2154	cirA_2		COG4771	Colicin I receptor
KJINAMHN_01291	CDS	756				hypothetical protein
KJINAMHN_01292	CDS	732	exbB		COG0811	Biopolymer transport protein ExbB
KJINAMHN_01293	CDS	480	exbD_2		COG0848	Biopolymer transport protein ExbD
KJINAMHN_01294	CDS	453				hypothetical protein
KJINAMHN_01295	CDS	660				hypothetical protein
KJINAMHN_01296	CDS	1407			COG2239	Magnesium transporter MgtE
KJINAMHN_01297	CDS	852	mntB_3			Manganese transport system membrane protein MntB
KJINAMHN_01298	CDS	852	mntB_4			Manganese transport system membrane protein MntB
KJINAMHN_01299	CDS	888	mntB_5		COG1121	Manganese transport system ATP-binding protein MntB
KJINAMHN_01300	CDS	903	yfeA		COG0803	Periplasmic chelated iron-binding protein YfeA
KJINAMHN_01301	CDS	546				hypothetical protein
KJINAMHN_01302	CDS	1194	ackA	2.7.2.1	COG0282	Acetate kinase
KJINAMHN_01303	CDS	1677				hypothetical protein
KJINAMHN_01304	CDS	438	pasT		COG2867	Persistence and stress-resistance toxin PasT
KJINAMHN_01305	CDS	297				hypothetical protein
KJINAMHN_01306	CDS	471	trmL	2.1.1.207	COG0219	tRNA (cytidine(34)-2'-O)-methyltransferase
KJINAMHN_01307	CDS	378				hypothetical protein
KJINAMHN_01308	CDS	1650	pyrG	6.3.4.2	COG0504	CTP synthase
KJINAMHN_01309	CDS	822	yeeZ		COG0451	Protein YeeZ
KJINAMHN_01310	CDS	168				hypothetical protein
KJINAMHN_01311	CDS	912	dmlR_2			HTH-type transcriptional regulator DmlR
KJINAMHN_01312	CDS	3477	dnaE	2.7.7.7	COG0587	DNA polymerase III subunit alpha
KJINAMHN_01313	CDS	264				hypothetical protein
KJINAMHN_01314	CDS	642	prtR		COG2932	HTH-type transcriptional regulator PrtR
KJINAMHN_01315	CDS	1896	htpG		COG0326	Chaperone protein HtpG
KJINAMHN_01316	tRNA	91				tRNA-Ser(gct)
KJINAMHN_01317	CDS	4554				hypothetical protein
KJINAMHN_01318	CDS	1440	gadC		COG0531	Glutamate/gamma-aminobutyrate antiporter
KJINAMHN_01319	CDS	1377	gadA	4.1.1.15	COG0076	Glutamate decarboxylase
KJINAMHN_01320	CDS	1299	guaD	3.5.4.3	COG0402	Guanine deaminase
KJINAMHN_01321	CDS	495				hypothetical protein
KJINAMHN_01322	CDS	1239	dadA1_2	1.4.99.-	COG0665	D-amino acid dehydrogenase 1
KJINAMHN_01323	CDS	891	hdfR			HTH-type transcriptional regulator HdfR
KJINAMHN_01324	CDS	411	greB_1		COG0782	Transcription elongation factor GreB
KJINAMHN_01325	CDS	1335				hypothetical protein
KJINAMHN_01326	CDS	2706				hypothetical protein
KJINAMHN_01327	CDS	615				hypothetical protein
KJINAMHN_01328	CDS	471	greB_2		COG0782	Transcription elongation factor GreB
KJINAMHN_01329	CDS	495				hypothetical protein
KJINAMHN_01330	CDS	981				hypothetical protein
KJINAMHN_01331	CDS	1026				hypothetical protein
KJINAMHN_01332	CDS	612	cas6f_2	3.1.-.-		CRISPR-associated endonuclease Cas6/Csy4
	repeat_region	143
KJINAMHN_01333	CDS	1065	capV	3.1.1.-	COG3621	cGAMP-activated phospholipase
KJINAMHN_01334	CDS	1308	dncV	2.7.7.-		Cyclic GMP-AMP synthase
KJINAMHN_01335	CDS	1770				hypothetical protein
KJINAMHN_01336	CDS	462				hypothetical protein
KJINAMHN_01337	CDS	462				hypothetical protein
KJINAMHN_01338	CDS	573				hypothetical protein
KJINAMHN_01339	CDS	165	greB_3		COG0782	Transcription elongation factor GreB
KJINAMHN_01340	CDS	1506		2.1.1.72	COG0286	putative type I restriction enzymeP M protein
KJINAMHN_01341	CDS	1518				hypothetical protein
KJINAMHN_01342	CDS	390				hypothetical protein
KJINAMHN_01343	CDS	1704				hypothetical protein
KJINAMHN_01344	CDS	1611	uvrD_2	3.6.4.12	COG0210	DNA helicase II
KJINAMHN_01345	CDS	2376				hypothetical protein
KJINAMHN_01346	CDS	144	greB_4		COG0782	Transcription elongation factor GreB
KJINAMHN_01347	CDS	411				putative protein/HI_1462.1
KJINAMHN_01348	CDS	396				hypothetical protein
KJINAMHN_01349	CDS	1272	proA	1.2.1.41		Gamma-glutamyl phosphate reductase
KJINAMHN_01350	CDS	333	grxD		COG0278	Glutaredoxin 4
KJINAMHN_01351	CDS	636	upp	2.4.2.9	COG0035	Uracil phosphoribosyltransferase
KJINAMHN_01352	CDS	1896	slt	4.2.2.-	COG0741	Soluble lytic murein transglycosylase
KJINAMHN_01353	CDS	483				hypothetical protein
KJINAMHN_01354	CDS	1560	rcsC_2	2.7.13.3		Sensor histidine kinase RcsC
KJINAMHN_01355	CDS	1392	zraR		COG2204	Transcriptional regulatory protein ZraR
KJINAMHN_01356	CDS	1179	cinA			Putative competence-damage inducible protein
KJINAMHN_01357	CDS	414	mutT	3.6.1.55	COG0494	8-oxo-dGTP diphosphatase
KJINAMHN_01358	CDS	1407	pykF	2.7.1.40	COG0469	Pyruvate kinase I
KJINAMHN_01359	CDS	1368	mepA_3			Multidrug export protein MepA
KJINAMHN_01360	CDS	915				hypothetical protein
KJINAMHN_01361	CDS	1329		1.1.99.3		Gluconate 2-dehydrogenase cytochrome c subunit
KJINAMHN_01362	CDS	1785		1.1.99.3		Gluconate 2-dehydrogenase flavoprotein
KJINAMHN_01363	CDS	690				hypothetical protein
KJINAMHN_01364	CDS	3099	ttrA	1.8.-.-	COG0243	Tetrathionate reductase subunit A
KJINAMHN_01365	CDS	1077	ttrC			Tetrathionate reductase subunit C
KJINAMHN_01366	CDS	735	ttrB		COG0437	Tetrathionate reductase subunit B
KJINAMHN_01367	CDS	1761	ttrS	2.7.13.3	COG0642	Tetrathionate sensor histidine kinase TtrS
KJINAMHN_01368	CDS	588	ttrR		COG4566	Tetrathionate response regulatory protein TtrR
KJINAMHN_01369	CDS	978	pucA	1.17.1.4	COG1975	putative xanthine dehydrogenase subunit A
KJINAMHN_01370	CDS	1245	nicB	1.17.2.1	COG1529	Nicotinate dehydrogenase subunit B
KJINAMHN_01371	CDS	549	hcrC	1.3.7.9		4-hydroxybenzoyl-CoA reductase subunit gamma
KJINAMHN_01372	CDS	2799				hypothetical protein
KJINAMHN_01373	CDS	2895				hypothetical protein
KJINAMHN_01374	CDS	1689				hypothetical protein
KJINAMHN_01375	CDS	759			COG0327	GTP cyclohydrolase 1 type 2
KJINAMHN_01376	CDS	3285				hypothetical protein
KJINAMHN_01377	CDS	1080				hypothetical protein
KJINAMHN_01378	CDS	858				hypothetical protein
KJINAMHN_01379	CDS	669				hypothetical protein
KJINAMHN_01380	CDS	993	trpS	6.1.1.2	COG0180	Tryptophan--tRNA ligase
KJINAMHN_01381	CDS	792	scpA		COG1354	Segregation and condensation protein A
KJINAMHN_01382	tRNA	75				tRNA-Gln(ttg)
KJINAMHN_01383	CDS	951	prs	2.7.6.1	COG0462	Ribose-phosphate pyrophosphokinase
KJINAMHN_01384	CDS	273			COG2924	putative Fe(2+)-trafficking protein
KJINAMHN_01385	CDS	558	ddpX_2	3.4.13.22	COG2173	D-alanyl-D-alanine dipeptidase
KJINAMHN_01386	tRNA	77				tRNA-Met(cat)
KJINAMHN_01387	CDS	234	ybcJ		COG2501	putative protein YbcJ
KJINAMHN_01388	CDS	1260	davT_4	2.6.1.48	COG0160	5-aminovalerate aminotransferase DavT
KJINAMHN_01389	CDS	1389			COG5383	putative protein
KJINAMHN_01390	CDS	405				hypothetical protein
KJINAMHN_01391	CDS	906	cyoA		COG1622	Cytochrome bo(3) ubiquinol oxidase subunit 2
KJINAMHN_01392	CDS	2007	cyoB	7.1.1.3	COG0843	Cytochrome bo(3) ubiquinol oxidase subunit 1
KJINAMHN_01393	CDS	609	cyoC		COG1845	Cytochrome bo(3) ubiquinol oxidase subunit 3
KJINAMHN_01394	CDS	327	cyoD		COG3125	Cytochrome bo(3) ubiquinol oxidase subunit 4
KJINAMHN_01395	CDS	852	cyoE	2.5.1.141	COG0109	Protoheme IX farnesyltransferase
KJINAMHN_01396	CDS	576	cetB	5.1.3.33		2-epi-5-epi-valiolone epimerase
KJINAMHN_01397	CDS	492	rutC_1	1.-.-.-		Putative aminoacrylate peracid reductase RutC
KJINAMHN_01398	CDS	786	ybfF	3.1.-.-	COG0596	Esterase YbfF
KJINAMHN_01399	CDS	1245			COG1055	putative transporter
KJINAMHN_01400	CDS	345				hypothetical protein
KJINAMHN_01401	CDS	927	rsmH	2.1.1.199	COG0275	Ribosomal RNA small subunit methyltransferase H
KJINAMHN_01402	CDS	324	ftsL			Cell division protein FtsL
KJINAMHN_01403	CDS	1755	ftsI	3.4.16.4	COG0768	Peptidoglycan D,D-transpeptidase FtsI
KJINAMHN_01404	CDS	1485	murE	6.3.2.13	COG0769	UDP-N-acetylmuramoyl-L-alanyl-D-glutamate--2,6-diaminopimelate ligase
KJINAMHN_01405	CDS	1350	murF	6.3.2.10	COG0770	UDP-N-acetylmuramoyl-tripeptide--D-alanyl-D-alanine ligase
KJINAMHN_01406	CDS	1083	mraY	2.7.8.13	COG0472	Phospho-N-acetylmuramoyl-pentapeptide-transferase
KJINAMHN_01407	CDS	600	yigZ		COG1739	IMPACT family member YigZ
KJINAMHN_01408	CDS	444				hypothetical protein
KJINAMHN_01409	CDS	798	pdxK	2.7.1.35	COG0351	Pyridoxine kinase
KJINAMHN_01410	CDS	1377	hemN	1.3.98.3	COG0635	Oxygen-independent coproporphyrinogen III oxidase
KJINAMHN_01411	CDS	1431	pykA	2.7.1.40	COG0469	Pyruvate kinase II
KJINAMHN_01412	CDS	645	queH	1.17.99.6	COG1636	Epoxyqueuosine reductase QueH
KJINAMHN_01413	CDS	849	sseB	2.8.1.1	COG2897	Putative thiosulfate sulfurtransferase SseB
KJINAMHN_01414	CDS	855				hypothetical protein
KJINAMHN_01415	CDS	1152	nhaA		COG3004	Na(+)/H(+) antiporter NhaA
KJINAMHN_01416	CDS	1284	sqr	1.8.5.4	COG0446	Sulfide-quinone reductase
KJINAMHN_01417	CDS	8328				hypothetical protein
KJINAMHN_01418	CDS	975				hypothetical protein
KJINAMHN_01419	CDS	285				hypothetical protein
KJINAMHN_01420	CDS	1002	hgdH	1.1.1.399	COG1052	(R)-2-hydroxyglutarate dehydrogenase
KJINAMHN_01421	CDS	1053				hypothetical protein
KJINAMHN_01422	CDS	462				hypothetical protein
KJINAMHN_01423	CDS	312	ssb_2		COG0629	Single-stranded DNA-binding protein
KJINAMHN_01424	CDS	1155				hypothetical protein
KJINAMHN_01425	CDS	2313				hypothetical protein
KJINAMHN_01426	CDS	1107	yehL		COG0714	putative protein YehL
KJINAMHN_01427	CDS	1866				hypothetical protein
KJINAMHN_01428	CDS	1437				hypothetical protein
KJINAMHN_01429	CDS	1149	cfa	2.1.1.79	COG2230	Cyclopropane-fatty-acyl-phospholipid synthase
KJINAMHN_01430	CDS	861	moaA_2			GTP 3',8-cyclase
KJINAMHN_01431	CDS	282				hypothetical protein
KJINAMHN_01432	CDS	2514				hypothetical protein
KJINAMHN_01433	tRNA	76				tRNA-Asp(gtc)
KJINAMHN_01434	tRNA	77				tRNA-Asp(gtc)
KJINAMHN_01435	CDS	888	gnu	5.1.3.26	COG0451	N-acetyl-alpha-D-glucosaminyl-diphospho-ditrans,octacis-undecaprenol 4-epimerase
KJINAMHN_01436	CDS	660				hypothetical protein
KJINAMHN_01437	CDS	1110	selU	2.5.1.-	COG2603	tRNA 2-selenouridine synthase
KJINAMHN_01438	CDS	1416	ftsY			Signal recognition particle receptor FtsY
KJINAMHN_01439	CDS	1131				hypothetical protein
KJINAMHN_01440	CDS	1086	tal	2.2.1.2		Transaldolase
KJINAMHN_01441	CDS	1200	fabV	1.3.1.9		Enoyl-[acyl-carrier-protein] reductase [NADH]
KJINAMHN_01442	CDS	891	tyrC	1.3.1.43		Cyclohexadienyl dehydrogenase
KJINAMHN_01443	CDS	2088	relA	2.7.6.5	COG0317	GTP pyrophosphokinase
KJINAMHN_01444	CDS	444	hslJ		COG3187	Heat shock protein HslJ
KJINAMHN_01445	CDS	2199	copA_2	7.2.2.8		putative copper-importing P-type ATPase A
KJINAMHN_01446	CDS	213	merP			Mercuric transport protein periplasmic component
KJINAMHN_01447	CDS	447	copY			Transcriptional repressor CopY
KJINAMHN_01448	CDS	468		1.11.1.15		Peroxiredoxin
KJINAMHN_01449	CDS	360				hypothetical protein
KJINAMHN_01450	CDS	948				hypothetical protein
KJINAMHN_01451	CDS	483	queF	1.7.1.13	COG0780	NADPH-dependent 7-cyano-7-deazaguanine reductase
KJINAMHN_01452	CDS	423				hypothetical protein
KJINAMHN_01453	CDS	2754	valS	6.1.1.9	COG0525	Valine--tRNA ligase
KJINAMHN_01454	CDS	2289	ydeP		COG0243	Protein YdeP
KJINAMHN_01455	CDS	1470	ppx	3.6.1.11	COG0248	Exopolyphosphatase
KJINAMHN_01456	CDS	810	rsmA	2.1.1.182	COG0030	Ribosomal RNA small subunit methyltransferase A
KJINAMHN_01457	CDS	984	surA	5.2.1.8	COG0760	Chaperone SurA
KJINAMHN_01458	CDS	657	proQ			RNA chaperone ProQ
KJINAMHN_01459	CDS	1707	argS	6.1.1.19		Arginine--tRNA ligase
KJINAMHN_01460	CDS	771	ftsN_1			Cell division protein FtsN
KJINAMHN_01461	CDS	558	ssb_3			Single-stranded DNA-binding protein
KJINAMHN_01462	CDS	1239	chaA		COG0387	Sodium-potassium/proton antiporter ChaA
KJINAMHN_01463	CDS	1824	typA		COG1217	GTP-binding protein TypA/BipA
KJINAMHN_01464	CDS	318	ydhR	1.-.-.-		Putative monooxygenase YdhR
KJINAMHN_01465	CDS	216	rpsU		COG0828	30S ribosomal protein S21
KJINAMHN_01466	CDS	1383	degP	3.4.21.107	COG0265	Periplasmic serine endoprotease DegP
KJINAMHN_01467	CDS	624				hypothetical protein
KJINAMHN_01468	CDS	1341	rlmD	2.1.1.190	COG2265	23S rRNA (uracil(1939)-C(5))-methyltransferase RlmD
KJINAMHN_01469	CDS	675	gph	3.1.3.18	COG0546	Phosphoglycolate phosphatase
KJINAMHN_01470	CDS	891	rdgC		COG2974	Recombination-associated protein RdgC
KJINAMHN_01471	CDS	1899	parE	5.6.2.2	COG0187	DNA topoisomerase 4 subunit B
KJINAMHN_01472	CDS	1038				hypothetical protein
KJINAMHN_01473	CDS	564				hypothetical protein
KJINAMHN_01474	CDS	270				hypothetical protein
KJINAMHN_01475	CDS	387				hypothetical protein
KJINAMHN_01476	CDS	594				hypothetical protein
KJINAMHN_01477	CDS	2094	sctC			Type 3 secretion system secretin
KJINAMHN_01478	CDS	567	aroK	2.7.1.71	COG0703	Shikimate kinase 1
KJINAMHN_01479	CDS	1086	aroB	4.2.3.4	COG0337	3-dehydroquinate synthase
KJINAMHN_01480	CDS	1281				hypothetical protein
KJINAMHN_01481	CDS	615				hypothetical protein
KJINAMHN_01482	CDS	1926	uup		COG0488	ABC transporter ATP-binding protein uup
KJINAMHN_01483	CDS	1530	cat1	2.8.3.-	COG0427	Succinyl-CoA:coenzyme A transferase
KJINAMHN_01484	CDS	450	aer		COG0840	Aerotaxis receptor
KJINAMHN_01485	CDS	975	kdsD	5.3.1.13	COG0517	Arabinose 5-phosphate isomerase KdsD
KJINAMHN_01486	CDS	1971	rep_2	3.6.4.12	COG0210	ATP-dependent DNA helicase Rep
KJINAMHN_01487	CDS	1365	dnaA		COG0593	Chromosomal replication initiator protein DnaA
KJINAMHN_01488	CDS	399				hypothetical protein
KJINAMHN_01489	CDS	777	occP			Octopine permease ATP-binding protein P
KJINAMHN_01490	CDS	1749	tamA		COG0729	Translocation and assembly module subunit TamA
KJINAMHN_01491	CDS	1293	tilS	6.3.4.19	COG0037	tRNA(Ile)-lysidine synthase
KJINAMHN_01492	CDS	888	rapZ		COG1660	RNase adapter protein RapZ
KJINAMHN_01493	CDS	882	folD		COG0190	Bifunctional protein FolD protein
KJINAMHN_01494	tRNA	83				tRNA-Leu(tag)
KJINAMHN_01495	CDS	1302	tig	5.2.1.8	COG0544	Trigger factor
KJINAMHN_01496	CDS	1683	leuA	2.3.3.13	COG0119	2-isopropylmalate synthase
KJINAMHN_01497	CDS	1203	metK	2.5.1.6	COG0192	S-adenosylmethionine synthase
KJINAMHN_01498	CDS	135				hypothetical protein
KJINAMHN_01499	CDS	348	rnpA	3.1.26.5	COG0594	Ribonuclease P protein component
KJINAMHN_01500	CDS	1695	yidC		COG0706	Membrane protein insertase YidC
KJINAMHN_01501	CDS	1326	mnmE	3.6.-.-	COG0486	tRNA modification GTPase MnmE
KJINAMHN_01502	CDS	1380	radA	3.6.4.-	COG1066	DNA repair protein RadA
KJINAMHN_01503	CDS	267	hfq		COG1923	RNA-binding protein Hfq
KJINAMHN_01504	CDS	1290	hflX		COG2262	GTPase HflX
KJINAMHN_01505	CDS	1278	hflK		COG0330	Modulator of FtsH protease HflK
KJINAMHN_01506	CDS	885	hflC		COG0330	Modulator of FtsH protease HflC
KJINAMHN_01507	CDS	1299	purA	6.3.4.4	COG0104	Adenylosuccinate synthetase
KJINAMHN_01508	CDS	600				hypothetical protein
KJINAMHN_01509	CDS	1209	gltS_2		COG0786	Sodium/glutamate symporter
KJINAMHN_01510	CDS	936	hutG	3.5.3.8	COG0010	Formimidoylglutamase
KJINAMHN_01511	CDS	729	kdgR		COG1414	Transcriptional regulator KdgR
KJINAMHN_01512	CDS	1317				hypothetical protein
KJINAMHN_01513	CDS	1356		3.4.24.-	COG0612	putative zinc protease
KJINAMHN_01514	CDS	723	yciK	1.-.-.-	COG1028	putative oxidoreductase YciK
KJINAMHN_01515	CDS	717	ubiG	2.1.1.222	COG2227	Ubiquinone biosynthesis O-methyltransferase
KJINAMHN_01516	CDS	612	cvpA		COG1286	Colicin V production protein
KJINAMHN_01517	CDS	735	ftsN_2			Cell division protein FtsN
KJINAMHN_01518	CDS	1278	folC	6.3.2.12	COG0285	Dihydrofolate synthase/folylpolyglutamate synthase
KJINAMHN_01519	CDS	912	accD	2.1.3.15	COG0777	Acetyl-coenzyme A carboxylase carboxyl transferase subunit beta
KJINAMHN_01520	CDS	456	sufU	2.-.-.-	COG0822	Zinc-dependent sulfurtransferase SufU
KJINAMHN_01521	CDS	387				hypothetical protein
KJINAMHN_01522	CDS	2298	tdhA		COG1629	TonB-dependent heme receptor A
KJINAMHN_01523	CDS	1347	accC	6.3.4.14	COG0439	Biotin carboxylase
KJINAMHN_01524	CDS	468	accB		COG0511	Biotin carboxyl carrier protein of acetyl-CoA carboxylase
KJINAMHN_01525	CDS	471	aroQ	4.2.1.10	COG0757	3-dehydroquinate dehydratase
KJINAMHN_01526	CDS	417				hypothetical protein
KJINAMHN_01527	CDS	951				hypothetical protein
KJINAMHN_01528	CDS	1242	mtr			Tryptophan-specific transport protein
KJINAMHN_01529	CDS	891				hypothetical protein
KJINAMHN_01530	CDS	1635	nhaK		COG0025	Sodium, potassium, lithium and rubidium/H(+) antiporter
KJINAMHN_01531	CDS	906	rarD		COG2962	Protein RarD
KJINAMHN_01532	CDS	660	rluA	5.4.99.28	COG0564	Dual-specificity RNA pseudouridine synthase RluA
KJINAMHN_01533	CDS	1320				hypothetical protein
KJINAMHN_01534	CDS	756	ucpA	1.-.-.-		Oxidoreductase UcpA
KJINAMHN_01535	CDS	771	ygiD	1.13.11.29	COG3384	4,5-DOPA dioxygenase extradiol
KJINAMHN_01536	CDS	1125	carA	6.3.5.5	COG0505	Carbamoyl-phosphate synthase small chain
KJINAMHN_01537	CDS	3219	carB	6.3.5.5	COG0458	Carbamoyl-phosphate synthase large chain
KJINAMHN_01538	CDS	948				hypothetical protein
KJINAMHN_01539	CDS	285				hypothetical protein
KJINAMHN_01540	CDS	1251	glyA	2.1.2.1	COG0112	Serine hydroxymethyltransferase
KJINAMHN_01541	CDS	666	pcm	2.1.1.77		Protein-L-isoaspartate O-methyltransferase
KJINAMHN_01542	CDS	2244	parC	5.6.2.2	COG0188	DNA topoisomerase 4 subunit A
KJINAMHN_01543	CDS	615	rplY			50S ribosomal protein L25
KJINAMHN_01544	CDS	567	pth	3.1.1.29		Peptidyl-tRNA hydrolase
KJINAMHN_01545	CDS	1092	ychF		COG0012	Ribosome-binding ATPase YchF
KJINAMHN_01546	CDS	5532				putative autotransporter
KJINAMHN_01547	CDS	342	rutC_2	1.-.-.-		Putative aminoacrylate peracid reductase RutC
KJINAMHN_01548	CDS	405				hypothetical protein
KJINAMHN_01549	CDS	3159				hypothetical protein
KJINAMHN_01550	CDS	306				hypothetical protein
KJINAMHN_01551	CDS	399				hypothetical protein
KJINAMHN_01552	tRNA	75				tRNA-Lys(ttt)
KJINAMHN_01553	tRNA	76				tRNA-Lys(ttt)
KJINAMHN_01554	CDS	948	ansA	3.5.1.1	COG0252	putative L-asparaginase
KJINAMHN_01555	CDS	120	lppL		COG5567	Lipopeptide
KJINAMHN_01556	CDS	1242	lysA	4.1.1.20	COG0019	Diaminopimelate decarboxylase
KJINAMHN_01557	CDS	1023	queA	2.4.99.17	COG0809	S-adenosylmethionine:tRNA ribosyltransferase-isomerase
KJINAMHN_01558	CDS	744	loiP	3.4.24.-	COG0501	Metalloprotease LoiP
KJINAMHN_01559	CDS	687	zinT		COG3443	Metal-binding protein ZinT
KJINAMHN_01560	CDS	1266	proP_3			Proline/betaine transporter
KJINAMHN_01561	CDS	489	folK	2.7.6.3	COG0801	2-amino-4-hydroxy-6-hydroxymethyldihydropteridine pyrophosphokinase
KJINAMHN_01562	CDS	204	cspC			Cold shock-like protein CspC
KJINAMHN_01563	CDS	2604	clpB		COG0542	Chaperone protein ClpB
KJINAMHN_01564	CDS	696				hypothetical protein
KJINAMHN_01565	CDS	963	bioB	2.8.1.6	COG0502	Biotin synthase
KJINAMHN_01566	CDS	1278	aroA	2.5.1.19	COG0128	3-phosphoshikimate 1-carboxyvinyltransferase
KJINAMHN_01567	CDS	396	xcpT		COG2165	Type II secretion system protein G
KJINAMHN_01568	CDS	528				hypothetical protein
KJINAMHN_01569	CDS	1902				hypothetical protein
KJINAMHN_01570	CDS	2196	pbpC		COG4953	Penicillin-binding protein 1C
KJINAMHN_01571	CDS	1446	cat	1.11.1.6		Catalase
KJINAMHN_01572	CDS	4776	yfhM		COG2373	Alpha-2-macroglobulin
KJINAMHN_01573	CDS	1335	cdr	1.8.1.14		Coenzyme A disulfide reductase
KJINAMHN_01574	CDS	1416	tcyP_2		COG1823	L-cystine uptake protein TcyP
KJINAMHN_01575	CDS	675	baeB	3.-.-.-	COG0491	putative polyketide biosynthesis zinc-dependent hydrolase BaeB
KJINAMHN_01576	CDS	870				hypothetical protein
KJINAMHN_01577	CDS	315	emrE		COG2076	Multidrug transporter EmrE
KJINAMHN_01578	CDS	360	ebrA			Multidrug resistance protein EbrA
KJINAMHN_01579	CDS	708	anr			Transcriptional activator protein Anr
KJINAMHN_01580	CDS	783	thiM	2.7.1.50	COG2145	Hydroxyethylthiazole kinase
KJINAMHN_01581	CDS	810	thiD	2.7.1.49		Hydroxymethylpyrimidine/phosphomethylpyrimidine kinase
KJINAMHN_01582	CDS	651	thiE	2.5.1.3		Thiamine-phosphate synthase
KJINAMHN_01583	CDS	645	nfsB	1.-.-.-	COG0778	Oxygen-insensitive NAD(P)H nitroreductase
KJINAMHN_01584	CDS	765	lpxH	3.6.1.54	COG2908	UDP-2,3-diacylglucosamine hydrolase
KJINAMHN_01585	CDS	501	ppiB	5.2.1.8	COG0652	Peptidyl-prolyl cis-trans isomerase B
KJINAMHN_01586	CDS	636				hypothetical protein
KJINAMHN_01587	CDS	1005	arcB	2.1.3.3	COG0078	Ornithine carbamoyltransferase, catabolic
KJINAMHN_01588	CDS	1368	glmU			Bifunctional protein GlmU
KJINAMHN_01589	CDS	318			COG4654	Cytochrome c-551
KJINAMHN_01590	CDS	1311	hmp	1.14.12.17		Flavohemoprotein
KJINAMHN_01591	CDS	1899				hypothetical protein
KJINAMHN_01592	CDS	1296		1.1.99.3		Gluconate 2-dehydrogenase cytochrome c subunit
KJINAMHN_01593	CDS	2409	gyrB	5.6.2.2	COG0187	DNA gyrase subunit B
KJINAMHN_01594	CDS	1092	recF_2		COG1195	DNA replication and repair protein RecF
KJINAMHN_01595	CDS	1101	dnaN		COG0592	Beta sliding clamp
KJINAMHN_01596	CDS	360	pleD			Response regulator PleD
KJINAMHN_01597	CDS	1077	pheA			Bifunctional chorismate mutase/prephenate dehydratase
KJINAMHN_01598	CDS	363	folB	4.1.2.25	COG1539	Dihydroneopterin aldolase
KJINAMHN_01599	CDS	237				hypothetical protein
KJINAMHN_01600	CDS	975				hypothetical protein
KJINAMHN_01601	CDS	1356	ffh		COG0541	Signal recognition particle protein
KJINAMHN_01602	CDS	795	ypjD		COG4137	Inner membrane protein YpjD
KJINAMHN_01603	CDS	744	tatC		COG0805	Sec-independent protein translocase protein TatC
KJINAMHN_01604	CDS	1416	gltX	6.1.1.17	COG0008	Glutamate--tRNA ligase
KJINAMHN_01605	CDS	2073	glyS	6.1.1.14	COG0751	Glycine--tRNA ligase beta subunit
KJINAMHN_01606	CDS	552		3.1.3.82	COG0241	D-glycero-beta-D-manno-heptose-1,7-bisphosphate 7-phosphatase
KJINAMHN_01607	CDS	726				hypothetical protein
KJINAMHN_01608	CDS	567				hypothetical protein
KJINAMHN_01609	CDS	1245	argA	2.3.1.1	COG0548	Amino-acid acetyltransferase
KJINAMHN_01610	CDS	387	phoP		COG0745	Alkaline phosphatase synthesis transcriptional regulatory protein PhoP
KJINAMHN_01611	CDS	459	rppH_3	3.6.1.-		RNA pyrophosphohydrolase
KJINAMHN_01612	CDS	1059	hemE	4.1.1.37	COG0407	Uroporphyrinogen decarboxylase
KJINAMHN_01613	CDS	756	rpsB		COG0052	30S ribosomal protein S2
KJINAMHN_01614	CDS	876	tsf		COG0264	Elongation factor Ts
KJINAMHN_01615	CDS	1704	proS	6.1.1.15	COG0442	Proline--tRNA ligase
KJINAMHN_01616	CDS	450				hypothetical protein
KJINAMHN_01617	CDS	1200	hipO_3	3.5.1.32	COG1473	Hippurate hydrolase
KJINAMHN_01618	CDS	354	ndhC	7.1.1.-		NAD(P)H-quinone oxidoreductase subunit 3
KJINAMHN_01619	CDS	486	nuoB	7.1.1.-	COG0377	NADH-quinone oxidoreductase subunit B
KJINAMHN_01620	CDS	696	ndhJ	7.1.1.-		NAD(P)H-quinone oxidoreductase subunit J, chloroplastic
KJINAMHN_01621	CDS	1251	nuoD	7.1.1.-	COG0649	NADH-quinone oxidoreductase subunit D
KJINAMHN_01622	CDS	516	nqo2	7.1.1.-	COG1905	NADH-quinone oxidoreductase chain 2
KJINAMHN_01623	CDS	1284	nuoF	7.1.1.-		NADH-quinone oxidoreductase subunit F
KJINAMHN_01624	CDS	2301	nqo3	7.1.1.-	COG1034	NADH-quinone oxidoreductase chain 3
KJINAMHN_01625	CDS	1044	nuoH	7.1.1.-	COG1005	NADH-quinone oxidoreductase subunit H
KJINAMHN_01626	CDS	492	nuoI	7.1.1.-	COG1143	NADH-quinone oxidoreductase subunit I
KJINAMHN_01627	CDS	666	nuoJ	7.1.1.-	COG0839	NADH-quinone oxidoreductase subunit J
KJINAMHN_01628	CDS	333	nuoK	7.1.1.-	COG0713	NADH-quinone oxidoreductase subunit K
KJINAMHN_01629	CDS	2001	nuoL	7.1.1.-	COG1009	NADH-quinone oxidoreductase subunit L
KJINAMHN_01630	CDS	1524	nuoM	7.1.1.-	COG1008	NADH-quinone oxidoreductase subunit M
KJINAMHN_01631	CDS	1446	nuoN	7.1.1.-	COG1007	NADH-quinone oxidoreductase subunit N
KJINAMHN_01632	CDS	564	mog	2.7.7.75	COG0521	Molybdopterin adenylyltransferase
KJINAMHN_01633	CDS	459				hypothetical protein
KJINAMHN_01634	CDS	1797	menF	5.4.4.2		Isochorismate synthase MenF
KJINAMHN_01635	CDS	585	pabA	2.6.1.85	COG0512	Aminodeoxychorismate/anthranilate synthase component 2
KJINAMHN_01636	CDS	1446	ald	1.2.1.83		3-succinoylsemialdehyde-pyridine dehydrogenase
KJINAMHN_01637	CDS	1161				hypothetical protein
KJINAMHN_01638	CDS	1806	uvrC		COG0322	UvrABC system protein C
KJINAMHN_01639	CDS	1782	asnB	6.3.5.4	COG0367	Asparagine synthetase [glutamine-hydrolyzing] 1
KJINAMHN_01640	CDS	315	iscA		COG0316	Iron-binding protein IscA
KJINAMHN_01641	CDS	324				hypothetical protein
KJINAMHN_01642	CDS	762				hypothetical protein
KJINAMHN_01643	CDS	498	coaD	2.7.7.3	COG0669	Phosphopantetheine adenylyltransferase
KJINAMHN_01644	CDS	1071	queG	1.17.99.6	COG1600	Epoxyqueuosine reductase
KJINAMHN_01645	CDS	480				hypothetical protein
KJINAMHN_01646	CDS	1131	yhhJ		COG0842	Inner membrane transport permease YhhJ
KJINAMHN_01647	CDS	2727	rbbA_2		COG0842	Ribosome-associated ATPase
KJINAMHN_01648	CDS	1074				hypothetical protein
KJINAMHN_01649	CDS	1668	ettA		COG0488	Energy-dependent translational throttle protein EttA
KJINAMHN_01650	CDS	177				hypothetical protein
KJINAMHN_01651	CDS	717	tsaB		COG1214	tRNA threonylcarbamoyladenosine biosynthesis protein TsaB
KJINAMHN_01652	CDS	738				hypothetical protein
KJINAMHN_01653	CDS	2004	cirA_3		COG4771	Colicin I receptor
KJINAMHN_01654	CDS	1029	pfp	2.7.1.90		Pyrophosphate--fructose 6-phosphate 1-phosphotransferase
KJINAMHN_01655	CDS	675	ygfZ			tRNA-modifying protein YgfZ
KJINAMHN_01656	CDS	1068	alr	5.1.1.1	COG0787	Alanine racemase, biosynthetic
KJINAMHN_01657	CDS	750	ydfG	1.1.1.381	COG4221	NADP-dependent 3-hydroxy acid dehydrogenase YdfG
KJINAMHN_01658	CDS	951	epmA	6.3.1.-	COG2269	Elongation factor P--(R)-beta-lysine ligase
KJINAMHN_01659	CDS	3294				hypothetical protein
KJINAMHN_01660	CDS	933	ghrA	1.1.1.79	COG0111	Glyoxylate/hydroxypyruvate reductase A
KJINAMHN_01661	CDS	261				hypothetical protein
KJINAMHN_01662	CDS	732	rlmB	2.1.1.185	COG0566	23S rRNA (guanosine-2'-O-)-methyltransferase RlmB
KJINAMHN_01663	CDS	1077	fbaA	4.1.2.13	COG0191	Fructose-bisphosphate aldolase class 2
KJINAMHN_01664	CDS	843				hypothetical protein
KJINAMHN_01665	CDS	3369	mfd	3.6.4.-	COG1197	Transcription-repair-coupling factor
KJINAMHN_01666	CDS	2202	rlmL		COG0116	Ribosomal RNA large subunit methyltransferase K/L
KJINAMHN_01667	CDS	13446				hypothetical protein
KJINAMHN_01668	CDS	570	yagU_2		COG3477	Inner membrane protein YagU
KJINAMHN_01669	CDS	453	cymR_2			HTH-type transcriptional regulator CymR
KJINAMHN_01670	CDS	1449	sufB		COG0719	FeS cluster assembly protein SufB
KJINAMHN_01671	CDS	768	sufC		COG0396	putative ATP-dependent transporter SufC
KJINAMHN_01672	CDS	1092				hypothetical protein
KJINAMHN_01673	CDS	1218	sufS	2.8.1.7	COG0520	Cysteine desulfurase
KJINAMHN_01674	CDS	942	yhbE		COG0697	putative inner membrane transporter YhbE
KJINAMHN_01675	CDS	852	cntI			Pseudopaline exporter CntI
KJINAMHN_01676	CDS	723	pagN		COG3637	Outer membrane protein PagN
KJINAMHN_01677	CDS	690				hypothetical protein
KJINAMHN_01678	CDS	2964				hypothetical protein
KJINAMHN_01679	CDS	432	glpE	2.8.1.1		Thiosulfate sulfurtransferase GlpE
KJINAMHN_01680	CDS	252	grxC		COG0695	Glutaredoxin 3
KJINAMHN_01681	CDS	468	secB		COG1952	Protein-export protein SecB
KJINAMHN_01682	CDS	1032	holA	2.7.7.7	COG1466	DNA polymerase III subunit delta
KJINAMHN_01683	CDS	579	scpB		COG1386	Segregation and condensation protein B
KJINAMHN_01684	CDS	1266	lolC_1		COG4591	Lipoprotein-releasing system transmembrane protein LolC
KJINAMHN_01685	CDS	1254	lolC_2		COG4591	Lipoprotein-releasing system transmembrane protein LolC
KJINAMHN_01686	CDS	684	lolD_1	3.6.3.-	COG1136	Lipoprotein-releasing system ATP-binding protein LolD
KJINAMHN_01687	CDS	672	dedA		COG0586	Protein DedA
KJINAMHN_01688	CDS	1257	rho	3.6.4.-	COG1158	Transcription termination factor Rho
KJINAMHN_01689	CDS	243	rpmE2		COG0254	50S ribosomal protein L31 type B
KJINAMHN_01690	CDS	1278	gltA	2.3.3.16	COG0372	Citrate synthase
KJINAMHN_01691	CDS	1020	pyrB	2.1.3.2	COG0540	Aspartate carbamoyltransferase catalytic subunit
KJINAMHN_01692	CDS	1287	eno	4.2.1.11		Enolase
KJINAMHN_01693	CDS	387				hypothetical protein
KJINAMHN_01694	CDS	294				hypothetical protein
KJINAMHN_01695	CDS	939	truB	5.4.99.25	COG0130	tRNA pseudouridine synthase B
KJINAMHN_01696	CDS	378	rbfA		COG0858	Ribosome-binding factor A
KJINAMHN_01697	CDS	2694	infB			Translation initiation factor IF-2
KJINAMHN_01698	CDS	1491	nusA		COG0195	Transcription termination/antitermination protein NusA
KJINAMHN_01699	CDS	513	rimP			Ribosome maturation factor RimP
KJINAMHN_01700	tRNA	77				tRNA-Met(cat)
KJINAMHN_01701	CDS	1209				hypothetical protein
KJINAMHN_01702	CDS	384				hypothetical protein
KJINAMHN_01703	CDS	312				hypothetical protein
KJINAMHN_01704	CDS	765	argT		COG0834	Lysine/arginine/ornithine-binding periplasmic protein
KJINAMHN_01705	CDS	612	rdgB	3.6.1.66	COG0127	dITP/XTP pyrophosphatase
KJINAMHN_01706	CDS	822				hypothetical protein
KJINAMHN_01707	tRNA	76				tRNA-Thr(tgt)
KJINAMHN_01708	CDS	1737	tmcA	2.3.1.193	COG1444	tRNA(Met) cytidine acetyltransferase TmcA
KJINAMHN_01709	CDS	1368	purB	4.3.2.2	COG0015	Adenylosuccinate lyase
KJINAMHN_01710	CDS	399				hypothetical protein
KJINAMHN_01711	CDS	369	yfgD		COG1393	putative protein YfgD
KJINAMHN_01712	CDS	1557	rep_3	3.6.4.12		ATP-dependent DNA helicase Rep
KJINAMHN_01713	CDS	792	nadX	1.4.1.21	COG1712	L-aspartate dehydrogenase
KJINAMHN_01714	CDS	1425	pntB	7.1.1.1	COG1282	NAD(P) transhydrogenase subunit beta
KJINAMHN_01715	CDS	282	pntA	7.1.1.1	COG3288	NAD(P) transhydrogenase subunit alpha
KJINAMHN_01716	CDS	1116	pntAA	7.1.1.1	COG3288	NAD(P) transhydrogenase subunit alpha part 1
KJINAMHN_01717	CDS	552				hypothetical protein
KJINAMHN_01718	CDS	1434	dnaB	3.6.4.12	COG0305	Replicative DNA helicase
KJINAMHN_01719	CDS	657				hypothetical protein
KJINAMHN_01720	CDS	642	pyrE_2	2.4.2.10	COG0461	Orotate phosphoribosyltransferase
KJINAMHN_01721	CDS	603	nudF	3.6.1.13		ADP-ribose pyrophosphatase
KJINAMHN_01722	CDS	618	yciO		COG0009	putative protein YciO
KJINAMHN_01723	CDS	357	rplS		COG0335	50S ribosomal protein L19
KJINAMHN_01724	CDS	852				hypothetical protein
KJINAMHN_01725	CDS	1254				hypothetical protein
KJINAMHN_01726	CDS	885	htpX	3.4.24.-	COG0501	Protease HtpX
KJINAMHN_01727	CDS	1008				hypothetical protein
KJINAMHN_01728	CDS	1563	putP		COG0591	Sodium/proline symporter
KJINAMHN_01729	CDS	468	ybeY	3.1.-.-	COG0319	Endoribonuclease YbeY
KJINAMHN_01730	CDS	963	ybeZ		COG1702	PhoH-like protein
KJINAMHN_01731	CDS	1692				hypothetical protein
KJINAMHN_01732	CDS	381	yabJ	3.5.99.10	COG0251	2-iminobutanoate/2-iminopropanoate deaminase
KJINAMHN_01733	CDS	690	rsuA_2	5.4.99.19	COG1187	Ribosomal small subunit pseudouridine synthase A
KJINAMHN_01734	CDS	1035	rlmG	2.1.1.174	COG2813	Ribosomal RNA large subunit methyltransferase G
KJINAMHN_01735	CDS	1614	pckA	4.1.1.49	COG1866	Phosphoenolpyruvate carboxykinase (ATP)
KJINAMHN_01736	CDS	1161	dacC	3.4.16.4	COG1686	D-alanyl-D-alanine carboxypeptidase DacC
KJINAMHN_01737	CDS	843	rlpA	4.2.2.-		Endolytic peptidoglycan transglycosylase RlpA
KJINAMHN_01738	CDS	1035				Tn3 family transposase TnXax1
KJINAMHN_01739	CDS	1137	mrdB	2.4.1.129	COG0772	Peptidoglycan glycosyltransferase MrdB
KJINAMHN_01740	CDS	1920	mrdA	3.4.16.4	COG0768	Peptidoglycan D,D-transpeptidase MrdA
KJINAMHN_01741	CDS	483				hypothetical protein
KJINAMHN_01742	CDS	879	mreC		COG1792	Cell shape-determining protein MreC
KJINAMHN_01743	CDS	1050	mreB		COG1077	Cell shape-determining protein MreB
KJINAMHN_01744	CDS	717	tpiA	5.3.1.1	COG0149	Triosephosphate isomerase
KJINAMHN_01745	CDS	348				hypothetical protein
KJINAMHN_01746	tRNA	85				tRNA-Leu(gag)
KJINAMHN_01747	CDS	1218	epsF		COG1459	Type II secretion system protein F
KJINAMHN_01748	CDS	930	outO			Type 4 prepilin-like proteins leader peptide-processing enzyme
KJINAMHN_01749	CDS	630	coaE	2.7.1.24	COG0237	Dephospho-CoA kinase
KJINAMHN_01750	CDS	714	zapD		COG4582	Cell division protein ZapD
KJINAMHN_01751	CDS	735	fabG	1.1.1.100		3-oxoacyl-[acyl-carrier-protein] reductase FabG
KJINAMHN_01752	CDS	240	acpP			Acyl carrier protein
KJINAMHN_01753	CDS	1242	fabF	2.3.1.179	COG0304	3-oxoacyl-[acyl-carrier-protein] synthase 2
KJINAMHN_01754	CDS	1077	mltG	4.2.2.-	COG1559	Endolytic murein transglycosylase
KJINAMHN_01755	CDS	612	tmk	2.7.4.9	COG0125	Thymidylate kinase
KJINAMHN_01756	CDS	942	holB	2.7.7.7	COG0470	DNA polymerase III subunit delta'
KJINAMHN_01757	CDS	474	pilE1		COG4969	Fimbrial protein
KJINAMHN_01758	CDS	483	pilE_1			Fimbrial protein
KJINAMHN_01759	CDS	504	pilE_2			Fimbrial protein
KJINAMHN_01760	CDS	1995	uvrB_3		COG0556	UvrABC system protein B
KJINAMHN_01761	CDS	2481	lon	3.4.21.53		Lon protease
KJINAMHN_01762	CDS	297	hupB		COG0776	DNA-binding protein HU-beta
KJINAMHN_01763	CDS	3972				hypothetical protein
KJINAMHN_01764	CDS	477				hypothetical protein
KJINAMHN_01765	CDS	276	ubiK			Ubiquinone biosynthesis accessory factor UbiK
KJINAMHN_01766	CDS	546	dsbB			Disulfide bond formation protein B
KJINAMHN_01767	CDS	258		2.8.1.-	COG0607	Sulfurtransferase
KJINAMHN_01768	CDS	372				hypothetical protein
KJINAMHN_01769	CDS	612				hypothetical protein
KJINAMHN_01770	CDS	564				hypothetical protein
KJINAMHN_01771	CDS	1809	recD	3.1.11.5	COG0507	RecBCD enzyme subunit RecD
KJINAMHN_01772	CDS	3234	recB	3.1.11.5		RecBCD enzyme subunit RecB
KJINAMHN_01773	CDS	222				hypothetical protein
KJINAMHN_01774	CDS	435				hypothetical protein
KJINAMHN_01775	CDS	1218	ispG	1.17.7.3	COG0821	4-hydroxy-3-methylbut-2-en-1-yl diphosphate synthase (flavodoxin)
KJINAMHN_01776	CDS	708	trmB	2.1.1.33	COG0220	tRNA (guanine-N(7)-)-methyltransferase
KJINAMHN_01777	CDS	753	mltF	4.2.2.-		Membrane-bound lytic murein transglycosylase F
KJINAMHN_01778	CDS	1149	adhB_2	1.1.1.1		Alcohol dehydrogenase 2
KJINAMHN_01779	CDS	558	epmC	1.14.-.-	COG3101	Elongation factor P hydroxylase
KJINAMHN_01780	CDS	1176	ydiK		COG0628	Putative transport protein YdiK
KJINAMHN_01781	CDS	477	greA		COG0782	Transcription elongation factor GreA
KJINAMHN_01782	CDS	426	gloA	4.4.1.5	COG0346	Lactoylglutathione lyase
KJINAMHN_01783	CDS	570	grpE			Protein GrpE
KJINAMHN_01784	CDS	192				hypothetical protein
KJINAMHN_01785	CDS	1590	rhlE	3.6.4.13		ATP-dependent RNA helicase RhlE
KJINAMHN_01786	CDS	297	lapA			Lipopolysaccharide assembly protein A
KJINAMHN_01787	CDS	1152	lapB		COG2956	Lipopolysaccharide assembly protein B
KJINAMHN_01788	CDS	699	pyrF	4.1.1.23	COG0284	Orotidine 5'-phosphate decarboxylase
KJINAMHN_01789	CDS	252	ibaG		COG5007	Acid stress protein IbaG
KJINAMHN_01790	CDS	1278	murA	2.5.1.7	COG0766	UDP-N-acetylglucosamine 1-carboxyvinyltransferase
KJINAMHN_01791	CDS	681	dnaQ	2.7.7.7	COG0847	DNA polymerase III subunit epsilon
KJINAMHN_01792	CDS	456	rnhA_2	3.1.26.4	COG0328	Ribonuclease HI
KJINAMHN_01793	CDS	795	thyA	2.1.1.45	COG0207	Thymidylate synthase
KJINAMHN_01794	CDS	819	lgt	2.5.1.145	COG0682	Phosphatidylglycerol--prolipoprotein diacylglyceryl transferase
KJINAMHN_01795	CDS	675				hypothetical protein
KJINAMHN_01796	CDS	888				hypothetical protein
KJINAMHN_01797	CDS	585				hypothetical protein
KJINAMHN_01798	CDS	1227	serA	1.1.1.95	COG0111	D-3-phosphoglycerate dehydrogenase
KJINAMHN_01799	CDS	1401	thrC	4.2.3.1	COG0498	Threonine synthase
KJINAMHN_01800	CDS	762				hypothetical protein
KJINAMHN_01801	CDS	1290	gluD	1.4.1.2		NAD-specific glutamate dehydrogenase
KJINAMHN_01802	CDS	1410	hsrA			putative transport protein HsrA
KJINAMHN_01803	tRNA	77				tRNA-Pro(tgg)
KJINAMHN_01804	tRNA	76				tRNA-His(gtg)
KJINAMHN_01805	tRNA	77				tRNA-Arg(tct)
KJINAMHN_01806	tRNA	77				tRNA-Pro(tgg)
KJINAMHN_01807	CDS	1140	cca		COG0617	Multifunctional CCA protein
KJINAMHN_01808	CDS	978	gshB_2	6.3.2.3		Glutathione synthetase
KJINAMHN_01809	CDS	1575				hypothetical protein
KJINAMHN_01810	CDS	558				hypothetical protein
KJINAMHN_01811	CDS	597	ruvA	3.6.4.12	COG0632	Holliday junction ATP-dependent DNA helicase RuvA
KJINAMHN_01812	CDS	483	ruvC	3.1.22.4	COG0817	Crossover junction endodeoxyribonuclease RuvC
KJINAMHN_01813	CDS	747	pmpR		COG0217	Transcriptional regulatory protein PmpR
KJINAMHN_01814	CDS	1317	pepQ	3.4.13.9	COG0006	Xaa-Pro dipeptidase
KJINAMHN_01815	CDS	3336				hypothetical protein
KJINAMHN_01816	CDS	810				hypothetical protein
KJINAMHN_01817	CDS	840	rbn	3.1.-.-	COG1234	Ribonuclease BN
KJINAMHN_01818	CDS	699	trmD	2.1.1.228	COG0336	tRNA (guanine-N(1)-)-methyltransferase
KJINAMHN_01819	CDS	513	rimM		COG0806	Ribosome maturation factor RimM
KJINAMHN_01820	CDS	252	rpsP		COG0228	30S ribosomal protein S16
KJINAMHN_01821	CDS	927	lpxC	3.5.1.108	COG0774	UDP-3-O-acyl-N-acetylglucosamine deacetylase
KJINAMHN_01822	CDS	1125	ftsZ		COG0206	Cell division protein FtsZ
KJINAMHN_01823	CDS	1260	ftsA		COG0849	Cell division protein FtsA
KJINAMHN_01824	CDS	828	ftsQ			Cell division protein FtsQ
KJINAMHN_01825	CDS	924	ddl	6.3.2.4		D-alanine--D-alanine ligase
KJINAMHN_01826	CDS	1428	murC	6.3.2.8	COG0773	UDP-N-acetylmuramate--L-alanine ligase
KJINAMHN_01827	CDS	1074	murG	2.4.1.227	COG0707	UDP-N-acetylglucosamine--N-acetylmuramyl-(pentapeptide) pyrophosphoryl-undecaprenol N-acetylglucosamine transferase
KJINAMHN_01828	CDS	1188	ftsW	2.4.1.129	COG0772	putative peptidoglycan glycosyltransferase FtsW
KJINAMHN_01829	CDS	1377	murD	6.3.2.9	COG0771	UDP-N-acetylmuramoylalanine--D-glutamate ligase
KJINAMHN_01830	CDS	450				hypothetical protein
KJINAMHN_01831	CDS	342	hpf		COG1544	Ribosome hibernation promoting factor
KJINAMHN_01832	CDS	921	yfeX	1.11.1.-	COG2837	Dye-decolorizing peroxidase YfeX
KJINAMHN_01833	CDS	549	vibB	3.3.2.1	COG1535	Vibriobactin-specific isochorismatase
KJINAMHN_01834	CDS	522	pagL	3.1.1.77		Lipid A deacylase PagL
KJINAMHN_01835	CDS	1113	dhaD	1.1.1.6		Glycerol dehydrogenase
KJINAMHN_01836	CDS	1158	yqhD	1.1.1.-	COG1979	Alcohol dehydrogenase YqhD
KJINAMHN_01837	CDS	1842				hypothetical protein
KJINAMHN_01838	CDS	504	ubiC	4.1.3.40		Chorismate pyruvate-lyase
KJINAMHN_01839	CDS	1035				hypothetical protein
KJINAMHN_01840	CDS	2286	btuB_2			Vitamin B12 transporter BtuB
KJINAMHN_01841	CDS	603				hypothetical protein
KJINAMHN_01842	CDS	480	yfkJ	3.1.3.48	COG0394	Low molecular weight protein-tyrosine-phosphatase YfkJ
KJINAMHN_01843	CDS	3399	recC	3.1.11.5	COG1330	RecBCD enzyme subunit RecC
KJINAMHN_01844	CDS	1500	trpE	4.1.3.27	COG0147	Anthranilate synthase component 1
KJINAMHN_01845	CDS	837				hypothetical protein
KJINAMHN_01846	CDS	828				hypothetical protein
KJINAMHN_01847	CDS	447	rimI	2.3.1.266	COG0456	[Ribosomal protein S18]-alanine N-acetyltransferase
KJINAMHN_01848	CDS	225	tusA		COG0425	Sulfur carrier protein TusA
KJINAMHN_01849	CDS	999				hypothetical protein
KJINAMHN_01850	CDS	1707	recJ	3.1.-.-	COG0608	Single-stranded-DNA-specific exonuclease RecJ
KJINAMHN_01851	CDS	1458	guaB	1.1.1.205	COG0516	Inosine-5'-monophosphate dehydrogenase
KJINAMHN_01852	CDS	1512	lysS	6.1.1.6	COG1190	Lysine--tRNA ligase
KJINAMHN_01853	CDS	690	mtnN	3.2.2.9	COG0775	5'-methylthioadenosine/S-adenosylhomocysteine nucleosidase
KJINAMHN_01854	CDS	1413	sacA_2	3.2.1.26		Sucrose-6-phosphate hydrolase
KJINAMHN_01855	CDS	375				hypothetical protein
KJINAMHN_01856	CDS	819	mutM	3.2.2.23	COG0266	Formamidopyrimidine-DNA glycosylase
KJINAMHN_01857	CDS	1497	proP_4			Proline/betaine transporter
KJINAMHN_01858	CDS	348	mliC			Membrane-bound lysozyme inhibitor of C-type lysozyme
KJINAMHN_01859	CDS	1557	rhlB_2	3.6.4.13		ATP-dependent RNA helicase RhlB
KJINAMHN_01860	CDS	543	gchK	2.7.13.3	COG0642	Globin-coupled histidine kinase
KJINAMHN_01861	CDS	1365	hisF	4.3.2.10		Imidazole glycerol phosphate synthase subunit HisF
KJINAMHN_01862	CDS	735	hisA	5.3.1.16	COG0106	1-(5-phosphoribosyl)-5-[(5-phosphoribosylamino)methylideneamino] imidazole-4-carboxamide isomerase
KJINAMHN_01863	CDS	1089	hisB		COG0131	Histidine biosynthesis bifunctional protein HisB
KJINAMHN_01864	CDS	1041	hisC	2.6.1.9	COG0079	Histidinol-phosphate aminotransferase
KJINAMHN_01865	CDS	1296	hisD	1.1.1.23	COG0141	Histidinol dehydrogenase
KJINAMHN_01866	CDS	894	hisG	2.4.2.17	COG0040	ATP phosphoribosyltransferase
KJINAMHN_01867	CDS	831		3.1.1.99		6-deoxy-6-sulfogluconolactonase
KJINAMHN_01868	CDS	792		1.1.1.390		Sulfoquinovose 1-dehydrogenase
KJINAMHN_01869	CDS	936				hypothetical protein
KJINAMHN_01870	CDS	1047				hypothetical protein
KJINAMHN_01871	CDS	834	metQ_5		COG1464	D-methionine-binding lipoprotein MetQ
KJINAMHN_01872	CDS	594	ynbA		COG0558	Inner membrane protein YnbA
KJINAMHN_01873	CDS	624				hypothetical protein
KJINAMHN_01874	CDS	939				hypothetical protein
KJINAMHN_01875	CDS	633	plsC	2.3.1.-	COG0204	1-acyl-sn-glycerol-3-phosphate acyltransferase
KJINAMHN_01876	CDS	1011				hypothetical protein
KJINAMHN_01877	CDS	468				hypothetical protein
KJINAMHN_01878	CDS	1983				hypothetical protein
KJINAMHN_01879	CDS	366				hypothetical protein
KJINAMHN_01880	CDS	858	btuF_3			Vitamin B12-binding protein
KJINAMHN_01881	CDS	1911	cirA_4		COG4771	Colicin I receptor
KJINAMHN_01882	CDS	972	hmuU_2		COG0609	Hemin transport system permease protein HmuU
KJINAMHN_01883	CDS	759	fepC		COG1120	Ferric enterobactin transport ATP-binding protein FepC
KJINAMHN_01884	CDS	723				hypothetical protein
KJINAMHN_01885	CDS	522				hypothetical protein
KJINAMHN_01886	CDS	1038	pyrC	3.5.2.3	COG0418	Dihydroorotase
KJINAMHN_01887	CDS	303				hypothetical protein
KJINAMHN_01888	CDS	432	dksA		COG1734	RNA polymerase-binding transcription factor DksA
KJINAMHN_01889	tRNA	75				tRNA-Glu(ttc)
KJINAMHN_01890	CDS	849	ligA_2	6.5.1.1		DNA ligase
KJINAMHN_01891	CDS	393				hypothetical protein
KJINAMHN_01892	CDS	834	aes	3.1.1.-		Acetyl esterase
KJINAMHN_01893	CDS	831	glpF		COG0580	Glycerol uptake facilitator protein
KJINAMHN_01894	CDS	1500	glpK	2.7.1.30	COG0554	Glycerol kinase
KJINAMHN_01895	CDS	1671	glpD	1.1.5.3		Aerobic glycerol-3-phosphate dehydrogenase
KJINAMHN_01896	CDS	429	rplM		COG0102	50S ribosomal protein L13
KJINAMHN_01897	CDS	393	rpsI		COG0103	30S ribosomal protein S9
KJINAMHN_01898	CDS	1227	pcnB	2.7.7.19	COG0617	Poly(A) polymerase I
KJINAMHN_01899	CDS	360	speH	4.1.1.50	COG1586	S-adenosylmethionine decarboxylase proenzyme
KJINAMHN_01900	CDS	138				hypothetical protein
KJINAMHN_01901	CDS	1542				hypothetical protein
KJINAMHN_01902	CDS	1005				hypothetical protein
KJINAMHN_01903	CDS	399				hypothetical protein
KJINAMHN_01904	CDS	1518	speE	2.5.1.16		Polyamine aminopropyltransferase
KJINAMHN_01905	CDS	1617				hypothetical protein
KJINAMHN_01906	CDS	615	tesA_2	3.1.1.1	COG2755	Esterase TesA
KJINAMHN_01907	CDS	687	lolD_2	3.6.3.-	COG1136	Lipoprotein-releasing system ATP-binding protein LolD
KJINAMHN_01908	CDS	2496				hypothetical protein
KJINAMHN_01909	CDS	651				hypothetical protein
KJINAMHN_01910	CDS	927	tsdA_2	1.8.2.2	COG3258	Thiosulfate dehydrogenase
KJINAMHN_01911	CDS	1866				hypothetical protein
KJINAMHN_01912	CDS	732				hypothetical protein
KJINAMHN_01913	CDS	1590	prfC		COG4108	Peptide chain release factor 3
KJINAMHN_01914	CDS	933				hypothetical protein
KJINAMHN_01915	CDS	153				hypothetical protein
KJINAMHN_01916	tRNA	75				tRNA-Asp(gtc)
KJINAMHN_01917	CDS	4614				hypothetical protein
KJINAMHN_01918	CDS	348				hypothetical protein
KJINAMHN_01919	CDS	258				hypothetical protein
KJINAMHN_01920	CDS	3099	hsdR_2	3.1.21.3		Type I restriction enzyme EcoR124II R protein
KJINAMHN_01921	CDS	435				hypothetical protein
KJINAMHN_01922	CDS	1017				hypothetical protein
KJINAMHN_01923	CDS	1197				hypothetical protein
KJINAMHN_01924	CDS	1551	prmC_3	2.1.1.297		Release factor glutamine methyltransferase
KJINAMHN_01925	CDS	1203				hypothetical protein
KJINAMHN_01926	CDS	4926				hypothetical protein
KJINAMHN_01927	CDS	1272	ltxD_2			Leukotoxin export protein LtxD
KJINAMHN_01928	CDS	642				hypothetical protein
KJINAMHN_01929	CDS	606				hypothetical protein
KJINAMHN_01930	CDS	1374				hypothetical protein
KJINAMHN_01931	CDS	822				IS3 family transposase ISPar1
KJINAMHN_01932	CDS	294				IS3 family transposase ISPar1
KJINAMHN_01933	tRNA	76				tRNA-Gly(gcc)
KJINAMHN_01934	CDS	4281				hypothetical protein
KJINAMHN_01935	CDS	450				hypothetical protein
KJINAMHN_01936	CDS	252				hypothetical protein
KJINAMHN_01937	CDS	1206	intS		COG0582	Prophage integrase IntS
KJINAMHN_01938	CDS	477				hypothetical protein
KJINAMHN_01939	CDS	606				hypothetical protein
KJINAMHN_01940	CDS	708				hypothetical protein
KJINAMHN_01941	CDS	387				hypothetical protein
KJINAMHN_01942	CDS	561				hypothetical protein
KJINAMHN_01943	CDS	1044				hypothetical protein
KJINAMHN_01944	CDS	345				hypothetical protein
KJINAMHN_01945	CDS	414	arsC	1.20.4.1		Arsenate reductase
KJINAMHN_01946	CDS	348	arsD			Arsenical resistance operon trans-acting repressor ArsD
KJINAMHN_01947	CDS	1752	arsA	7.3.2.7		Arsenical pump-driving ATPase
KJINAMHN_01948	CDS	1035	acr3		COG0798	Arsenical-resistance protein Acr3
KJINAMHN_01949	CDS	297				hypothetical protein
KJINAMHN_01950	CDS	888				hypothetical protein
KJINAMHN_01951	CDS	468				hypothetical protein
KJINAMHN_01952	CDS	174				hypothetical protein
KJINAMHN_01953	CDS	333				hypothetical protein
KJINAMHN_01954	CDS	432				hypothetical protein
KJINAMHN_01955	CDS	255				hypothetical protein
KJINAMHN_01956	CDS	1005				hypothetical protein
KJINAMHN_01957	CDS	537				hypothetical protein
KJINAMHN_01958	CDS	264	yoeB	3.1.-.-	COG4115	Toxin YoeB
KJINAMHN_01959	CDS	258	yefM		COG2161	Antitoxin YefM
KJINAMHN_01960	rRNA	1535				16S ribosomal RNA
KJINAMHN_01961	tRNA	77				tRNA-Ile(gat)
KJINAMHN_01962	tRNA	76				tRNA-Ala(tgc)
KJINAMHN_01963	rRNA	2904				23S ribosomal RNA
KJINAMHN_01964	rRNA	104				5S ribosomal RNA
KJINAMHN_01965	CDS	1050				hypothetical protein
KJINAMHN_01966	CDS	582				hypothetical protein
KJINAMHN_01967	CDS	225				hypothetical protein
KJINAMHN_01968	CDS	267	relG	3.1.-.-	COG2026	Toxin RelG
KJINAMHN_01969	CDS	603	hin		COG1961	DNA-invertase hin
KJINAMHN_01970	CDS	438				hypothetical protein
KJINAMHN_01971	CDS	270				hypothetical protein
KJINAMHN_01972	CDS	120				hypothetical protein
KJINAMHN_01973	CDS	180				hypothetical protein
KJINAMHN_01974	CDS	1803				hypothetical protein
KJINAMHN_01975	CDS	135				hypothetical protein
KJINAMHN_01976	CDS	1053				hypothetical protein
KJINAMHN_01977	CDS	783				hypothetical protein
KJINAMHN_01978	CDS	120				hypothetical protein
KJINAMHN_01979	CDS	795				hypothetical protein
KJINAMHN_01980	CDS	267				IS3 family transposase ISAca1
KJINAMHN_01981	CDS	789				IS3 family transposase ISAca1
KJINAMHN_01982	CDS	144				hypothetical protein
KJINAMHN_01983	CDS	345				IS3 family transposase ISAba22
KJINAMHN_01984	CDS	327				hypothetical protein
KJINAMHN_01985	CDS	417				hypothetical protein
KJINAMHN_01986	CDS	228				hypothetical protein
KJINAMHN_01987	CDS	192				hypothetical protein
KJINAMHN_01988	tRNA	76				tRNA-Gly(gcc)
KJINAMHN_01989	tRNA	73				tRNA-Gly(gcc)

## Sheet: DSM 100676
locus_tag	ftype	length_bp	gene	EC_number	COG	product
DLDIKGPM_00001	CDS	138	ltxD_1			Leukotoxin export protein LtxD
DLDIKGPM_00002	CDS	393				hypothetical protein
DLDIKGPM_00003	CDS	687				IS6 family transposase ISBmu21
DLDIKGPM_00004	CDS	1374	phrB	4.1.99.3	COG0415	Deoxyribodipyrimidine photo-lyase
DLDIKGPM_00005	CDS	684	rnhA_1	3.1.26.4		Ribonuclease H
DLDIKGPM_00006	CDS	2430				hypothetical protein
DLDIKGPM_00007	CDS	1803				hypothetical protein
DLDIKGPM_00008	CDS	1296				hypothetical protein
DLDIKGPM_00009	CDS	1452				hypothetical protein
DLDIKGPM_00010	CDS	2004				hypothetical protein
DLDIKGPM_00011	CDS	2979				hypothetical protein
DLDIKGPM_00012	CDS	582	cpdA	3.1.4.53		3',5'-cyclic adenosine monophosphate phosphodiesterase CpdA
DLDIKGPM_00013	CDS	267				hypothetical protein
DLDIKGPM_00014	CDS	228				hypothetical protein
DLDIKGPM_00015	CDS	198				hypothetical protein
DLDIKGPM_00016	CDS	360				hypothetical protein
DLDIKGPM_00017	CDS	759				hypothetical protein
DLDIKGPM_00018	CDS	492	rutF	1.5.1.42	COG1853	FMN reductase (NADH) RutF
DLDIKGPM_00019	CDS	1032	xecA1	4.4.1.23		2-hydroxypropyl-CoM lyase
DLDIKGPM_00020	CDS	978				hypothetical protein
DLDIKGPM_00021	CDS	1143				hypothetical protein
DLDIKGPM_00022	CDS	1350	dat	2.6.1.76	COG0160	Diaminobutyrate--2-oxoglutarate aminotransferase
DLDIKGPM_00023	CDS	1440	ddc	4.1.1.86	COG0076	L-2,4-diaminobutyrate decarboxylase
DLDIKGPM_00024	CDS	360				hypothetical protein
DLDIKGPM_00025	CDS	645	mtcA2	4.2.1.1	COG0288	Carbonic anhydrase 2
DLDIKGPM_00026	CDS	1791	rep_1	3.6.4.12		ATP-dependent DNA helicase Rep
DLDIKGPM_00027	CDS	576	ybiX	1.14.11.-		PKHD-type hydroxylase YbiX
DLDIKGPM_00028	CDS	165				hypothetical protein
DLDIKGPM_00029	CDS	1539	actP_1		COG4147	Cation/acetate symporter ActP
DLDIKGPM_00030	CDS	348				hypothetical protein
DLDIKGPM_00031	CDS	663				hypothetical protein
DLDIKGPM_00032	CDS	336				hypothetical protein
DLDIKGPM_00033	CDS	1041				hypothetical protein
DLDIKGPM_00034	CDS	231	yeeD		COG0425	Putative sulfur carrier protein YeeD
DLDIKGPM_00035	CDS	1308	ttuB			Putative tartrate transporter
DLDIKGPM_00036	CDS	540	blc		COG3040	Outer membrane lipoprotein Blc
DLDIKGPM_00037	CDS	1410	patA_1	2.3.1.-	COG1696	Peptidoglycan O-acetyltransferase
DLDIKGPM_00038	CDS	1065				hypothetical protein
DLDIKGPM_00039	CDS	1215				hypothetical protein
DLDIKGPM_00040	CDS	1893	mnmG		COG0445	tRNA uridine 5-carboxymethylaminomethyl modification enzyme MnmG
DLDIKGPM_00041	CDS	2514				hypothetical protein
DLDIKGPM_00042	CDS	240	sdhE		COG2938	FAD assembly factor SdhE
DLDIKGPM_00043	CDS	894	prmA	2.1.1.-	COG2264	Ribosomal protein L11 methyltransferase
DLDIKGPM_00044	CDS	966	dusB	1.3.1.-	COG0042	tRNA-dihydrouridine synthase B
DLDIKGPM_00045	CDS	270	fis		COG2901	DNA-binding protein Fis
DLDIKGPM_00046	CDS	648	can	4.2.1.1	COG0288	Carbonic anhydrase 2
DLDIKGPM_00047	CDS	564	yeiP		COG0231	Elongation factor P-like protein
DLDIKGPM_00048	CDS	1404	alsT_1		COG1115	Amino-acid carrier protein AlsT
DLDIKGPM_00049	CDS	879	pflA	1.97.1.4	COG1180	Pyruvate formate-lyase 1-activating enzyme
DLDIKGPM_00050	CDS	2250	pflB	2.3.1.54		Formate acetyltransferase
DLDIKGPM_00051	CDS	483				hypothetical protein
DLDIKGPM_00052	CDS	1353	yeeO		COG0534	putative FMN/FAD exporter YeeO
DLDIKGPM_00053	CDS	246				hypothetical protein
DLDIKGPM_00054	CDS	1194	hipO_1	3.5.1.32	COG1473	Hippurate hydrolase
DLDIKGPM_00055	CDS	2592	mutS		COG0249	DNA mismatch repair protein MutS
DLDIKGPM_00056	CDS	1560				hypothetical protein
DLDIKGPM_00057	CDS	837	hslO		COG1281	33 kDa chaperonin
DLDIKGPM_00058	CDS	639	ubiX	2.5.1.129	COG0163	Flavin prenyltransferase UbiX
DLDIKGPM_00059	CDS	933				hypothetical protein
DLDIKGPM_00060	CDS	924	zipA			Cell division protein ZipA
DLDIKGPM_00061	CDS	105				hypothetical protein
DLDIKGPM_00062	CDS	2025	ligA_1	6.5.1.2	COG0272	DNA ligase
DLDIKGPM_00063	CDS	681	trmO	2.1.1.-	COG1720	tRNA (adenine(37)-N6)-methyltransferase
DLDIKGPM_00064	CDS	501	hutX		COG3721	Intracellular heme transport protein HutX
DLDIKGPM_00065	CDS	609	hutZ	1.14.99.58	COG0748	Heme oxygenase HutZ
DLDIKGPM_00066	CDS	2583	leuS	6.1.1.4		Leucine--tRNA ligase
DLDIKGPM_00067	CDS	1278	ampG		COG0477	Anhydromuropeptide permease
DLDIKGPM_00068	CDS	525	speG	2.3.1.57	COG1670	Spermidine N(1)-acetyltransferase
DLDIKGPM_00069	CDS	687				hypothetical protein
DLDIKGPM_00070	tRNA	77				tRNA-Met(cat)
DLDIKGPM_00071	tRNA	77				tRNA-Val(gac)
DLDIKGPM_00072	CDS	966	ppsC	2.3.1.41		Phthiocerol synthesis polyketide synthase type I PpsC
DLDIKGPM_00073	CDS	834	ttcA	2.8.1.-	COG0037	tRNA-cytidine(32) 2-sulfurtransferase
DLDIKGPM_00074	CDS	762	moeB	2.7.7.80	COG0476	Molybdopterin-synthase adenylyltransferase
DLDIKGPM_00075	CDS	1509	iscS_1	2.8.1.7		Cysteine desulfurase IscS
DLDIKGPM_00076	CDS	591	pgsA	2.7.8.5	COG0558	CDP-diacylglycerol--glycerol-3-phosphate 3-phosphatidyltransferase
DLDIKGPM_00077	CDS	699	hisM		COG4160	Histidine transport system permease protein HisM
DLDIKGPM_00078	CDS	729	hisQ		COG4215	Histidine transport system permease protein HisQ
DLDIKGPM_00079	CDS	1650	glnS	6.1.1.18	COG0008	Glutamine--tRNA ligase
DLDIKGPM_00080	CDS	2049	sthA	1.6.1.1		Soluble pyridine nucleotide transhydrogenase
DLDIKGPM_00081	CDS	1308	aceF	2.3.1.12	COG0508	Dihydrolipoyllysine-residue acetyltransferase component of pyruvate dehydrogenase complex
DLDIKGPM_00082	CDS	2676	aceE	1.2.4.1	COG2609	Pyruvate dehydrogenase E1 component
DLDIKGPM_00083	CDS	1233				hypothetical protein
DLDIKGPM_00084	CDS	1377	pepA_1	3.4.11.10		cytosol aminopeptidase
DLDIKGPM_00085	CDS	3615				hypothetical protein
DLDIKGPM_00086	CDS	2844	secD			Protein translocase subunit SecD
DLDIKGPM_00087	CDS	417				hypothetical protein
DLDIKGPM_00088	CDS	1974	tktA	2.2.1.1	COG0021	Transketolase 1
DLDIKGPM_00089	CDS	600				hypothetical protein
DLDIKGPM_00090	CDS	1401				hypothetical protein
DLDIKGPM_00091	CDS	339				hypothetical protein
DLDIKGPM_00092	CDS	528	dps	1.16.-.-		DNA protection during starvation protein
DLDIKGPM_00093	CDS	756				hypothetical protein
DLDIKGPM_00094	CDS	732	exbB		COG0811	Biopolymer transport protein ExbB
DLDIKGPM_00095	CDS	480	exbD_1		COG0848	Biopolymer transport protein ExbD
DLDIKGPM_00096	CDS	453				hypothetical protein
DLDIKGPM_00097	CDS	660				hypothetical protein
DLDIKGPM_00098	CDS	1407			COG2239	Magnesium transporter MgtE
DLDIKGPM_00099	CDS	852	mntB_1			Manganese transport system membrane protein MntB
DLDIKGPM_00100	CDS	852	mntB_2			Manganese transport system membrane protein MntB
DLDIKGPM_00101	CDS	888	mntB_3		COG1121	Manganese transport system ATP-binding protein MntB
DLDIKGPM_00102	CDS	903	yfeA		COG0803	Periplasmic chelated iron-binding protein YfeA
DLDIKGPM_00103	CDS	546				hypothetical protein
DLDIKGPM_00104	CDS	1194	ackA	2.7.2.1	COG0282	Acetate kinase
DLDIKGPM_00105	CDS	1677				hypothetical protein
DLDIKGPM_00106	CDS	441	pasT		COG2867	Persistence and stress-resistance toxin PasT
DLDIKGPM_00107	CDS	297				hypothetical protein
DLDIKGPM_00108	CDS	471	trmL	2.1.1.207	COG0219	tRNA (cytidine(34)-2'-O)-methyltransferase
DLDIKGPM_00109	CDS	378				hypothetical protein
DLDIKGPM_00110	CDS	1650	pyrG	6.3.4.2	COG0504	CTP synthase
DLDIKGPM_00111	CDS	822	yeeZ		COG0451	Protein YeeZ
DLDIKGPM_00112	CDS	168				hypothetical protein
DLDIKGPM_00113	CDS	912	dmlR_1			HTH-type transcriptional regulator DmlR
DLDIKGPM_00114	CDS	3477	dnaE	2.7.7.7	COG0587	DNA polymerase III subunit alpha
DLDIKGPM_00115	CDS	264				hypothetical protein
DLDIKGPM_00116	CDS	642	prtR		COG2932	HTH-type transcriptional regulator PrtR
DLDIKGPM_00117	CDS	1896	htpG		COG0326	Chaperone protein HtpG
DLDIKGPM_00118	tRNA	91				tRNA-Ser(gct)
DLDIKGPM_00119	CDS	17673				hypothetical protein
DLDIKGPM_00120	CDS	189				hypothetical protein
DLDIKGPM_00121	CDS	1392	gabD_1	1.2.1.79	COG1012	Succinate-semialdehyde dehydrogenase [NADP(+)]
DLDIKGPM_00122	CDS	921	dmlR_2			HTH-type transcriptional regulator DmlR
DLDIKGPM_00123	CDS	1098	dmlA	1.1.1.83	COG0473	D-malate dehydrogenase [decarboxylating]
DLDIKGPM_00124	CDS	915				hypothetical protein
DLDIKGPM_00125	CDS	951	cntB	1.14.13.239	COG1018	Carnitine monooxygenase reductase subunit
DLDIKGPM_00126	CDS	1128	cntA	1.14.13.239	COG4638	Carnitine monooxygenase oxygenase subunit
DLDIKGPM_00127	CDS	1542	opuD		COG1292	Glycine betaine transporter OpuD
DLDIKGPM_00128	CDS	711	menH_1	4.2.99.20		2-succinyl-6-hydroxy-2,4-cyclohexadiene-1-carboxylate synthase
DLDIKGPM_00129	CDS	138				hypothetical protein
DLDIKGPM_00130	CDS	894				hypothetical protein
DLDIKGPM_00131	CDS	933				hypothetical protein
DLDIKGPM_00132	CDS	1017	nadA	2.5.1.72	COG0379	Quinolinate synthase A
DLDIKGPM_00133	CDS	858	nadC_1	2.4.2.19	COG0157	putative nicotinate-nucleotide pyrophosphorylase [carboxylating]
DLDIKGPM_00134	CDS	825	sdhL	1.1.1.25	COG0169	Shikimate dehydrogenase-like protein
DLDIKGPM_00135	CDS	1419	fdhC_1			Fructose dehydrogenase cytochrome subunit
DLDIKGPM_00136	CDS	1653	fdhL	1.1.99.11		Fructose dehydrogenase large subunit
DLDIKGPM_00137	CDS	519	fdhS			Fructose dehydrogenase small subunit
DLDIKGPM_00138	CDS	903	yijE			putative cystine transporter YijE
DLDIKGPM_00139	CDS	855	cvfB		COG2996	Conserved virulence factor B
DLDIKGPM_00140	CDS	1116	ydhC			Inner membrane transport protein YdhC
DLDIKGPM_00141	CDS	798	viuB		COG2375	Vibriobactin utilization protein ViuB
DLDIKGPM_00142	CDS	759	nimR_1			HTH-type transcriptional regulator NimR
DLDIKGPM_00143	CDS	2688	acnA	4.2.1.3	COG1048	Aconitate hydratase A
DLDIKGPM_00144	CDS	522	ahpD	1.11.1.15	COG2128	Alkyl hydroperoxide reductase AhpD
DLDIKGPM_00145	CDS	2061	yccS_1		COG1289	Inner membrane protein YccS
DLDIKGPM_00146	CDS	1794	dsbD	1.8.1.8	COG4232	Thiol:disulfide interchange protein DsbD
DLDIKGPM_00147	tRNA	76				tRNA-Gly(gcc)
DLDIKGPM_00148	CDS	951	cmoB	2.5.1.-	COG0500	tRNA U34 carboxymethyltransferase
DLDIKGPM_00149	CDS	738	cmoA	2.1.3.-	COG0500	Carboxy-S-adenosyl-L-methionine synthase
DLDIKGPM_00150	CDS	642	tatB			Sec-independent protein translocase protein TatB
DLDIKGPM_00151	CDS	249	tatA			Sec-independent protein translocase protein TatA
DLDIKGPM_00152	tRNA	76				tRNA-Gly(gcc)
DLDIKGPM_00153	tRNA	74				tRNA-Cys(gca)
DLDIKGPM_00154	CDS	1896	dnaX	2.7.7.7	COG2812	DNA polymerase III subunit tau
DLDIKGPM_00155	CDS	333	ybaB		COG0718	Nucleoid-associated protein YbaB
DLDIKGPM_00156	CDS	606	recR		COG0353	Recombination protein RecR
DLDIKGPM_00157	CDS	342		3.9.1.-	COG0537	Purine nucleoside phosphoramidase
DLDIKGPM_00158	CDS	513	apt	2.4.2.7		Adenine phosphoribosyltransferase
DLDIKGPM_00159	CDS	2445	lptD		COG1452	LPS-assembly protein LptD
DLDIKGPM_00160	CDS	1344	hslU		COG1220	ATP-dependent protease ATPase subunit HslU
DLDIKGPM_00161	CDS	540	hslV	3.4.25.2	COG5405	ATP-dependent protease subunit HslV
DLDIKGPM_00162	CDS	717				hypothetical protein
DLDIKGPM_00163	CDS	798			COG0725	Putative binding protein
DLDIKGPM_00164	CDS	789	cysW		COG4208	Sulfate transport system permease protein CysW
DLDIKGPM_00165	CDS	702	cysA_1	7.3.2.3	COG1118	Sulfate/thiosulfate import ATP-binding protein CysA
DLDIKGPM_00166	CDS	840	nadC_2	2.4.2.19	COG0157	putative nicotinate-nucleotide pyrophosphorylase [carboxylating]
DLDIKGPM_00167	CDS	1629				hypothetical protein
DLDIKGPM_00168	CDS	2922				hypothetical protein
DLDIKGPM_00169	CDS	576	pucB		COG2068	Purine catabolism protein PucB
DLDIKGPM_00170	CDS	1392	gabD1	1.2.1.79	COG1012	Succinate-semialdehyde dehydrogenase [NADP(+)] 1
DLDIKGPM_00171	CDS	882	yddG		COG0697	Aromatic amino acid exporter YddG
DLDIKGPM_00172	CDS	1017	cydB	7.1.1.7	COG1294	Cytochrome bd-I ubiquinol oxidase subunit 2
DLDIKGPM_00173	CDS	1323	ythA	1.10.3.-	COG1271	Putative cytochrome bd menaquinol oxidase subunit I
DLDIKGPM_00174	CDS	258				hypothetical protein
DLDIKGPM_00175	CDS	651	yiaD		COG2885	putative lipoprotein YiaD
DLDIKGPM_00176	CDS	1473				hypothetical protein
DLDIKGPM_00177	CDS	1320				hypothetical protein
DLDIKGPM_00178	CDS	1293	davT_1	2.6.1.48	COG0160	5-aminovalerate aminotransferase DavT
DLDIKGPM_00179	CDS	1389	gabD_2	1.2.1.79	COG1012	Succinate-semialdehyde dehydrogenase [NADP(+)]
DLDIKGPM_00180	CDS	1098				hypothetical protein
DLDIKGPM_00181	CDS	519	def	3.5.1.88	COG0242	Peptide deformylase
DLDIKGPM_00182	CDS	942	fmt	2.1.2.9	COG0223	Methionyl-tRNA formyltransferase
DLDIKGPM_00183	CDS	1530	rsmB	2.1.1.176	COG0144	Ribosomal RNA small subunit methyltransferase B
DLDIKGPM_00184	CDS	561				hypothetical protein
DLDIKGPM_00185	CDS	2145	sasA_1	2.7.-.-		Adaptive-response sensory-kinase SasA
DLDIKGPM_00186	CDS	1386	argH	4.3.2.1	COG0165	Argininosuccinate lyase
DLDIKGPM_00187	CDS	2157				hypothetical protein
DLDIKGPM_00188	CDS	594				hypothetical protein
DLDIKGPM_00189	CDS	789	menH_2	4.2.99.20		2-succinyl-6-hydroxy-2,4-cyclohexadiene-1-carboxylate synthase
DLDIKGPM_00190	CDS	1164	bioF	2.3.1.47	COG0156	8-amino-7-oxononanoate synthase
DLDIKGPM_00191	CDS	768	bioC	2.1.1.197		Malonyl-[acyl-carrier protein] O-methyltransferase
DLDIKGPM_00192	CDS	495	purE	5.4.99.18	COG0041	N5-carboxyaminoimidazole ribonucleotide mutase
DLDIKGPM_00193	CDS	1125	purK	6.3.4.18		N5-carboxyaminoimidazole ribonucleotide synthase
DLDIKGPM_00194	CDS	714	purC	6.3.2.6	COG0152	Phosphoribosylaminoimidazole-succinocarboxamide synthase
DLDIKGPM_00195	CDS	1401	purF	2.4.2.14	COG0034	Amidophosphoribosyltransferase
DLDIKGPM_00196	CDS	1011	purM	6.3.3.1	COG0150	Phosphoribosylformylglycinamidine cyclo-ligase
DLDIKGPM_00197	CDS	585	purN	2.1.2.2		Phosphoribosylglycinamide formyltransferase
DLDIKGPM_00198	CDS	1542	purH			Bifunctional purine biosynthesis protein PurH
DLDIKGPM_00199	CDS	1581		1.4.3.2	COG1231	L-amino acid oxidase
DLDIKGPM_00200	CDS	414	fdhC_2			Fructose dehydrogenase cytochrome subunit
DLDIKGPM_00201	CDS	900	mrr		COG1715	Mrr restriction system protein
DLDIKGPM_00202	CDS	1260	purD	6.3.4.13	COG0151	Phosphoribosylamine--glycine ligase
DLDIKGPM_00203	CDS	1401				hypothetical protein
DLDIKGPM_00204	CDS	960	selD	2.7.9.3	COG0709	Selenide, water dikinase
DLDIKGPM_00205	CDS	873	nadK	2.7.1.23		NAD kinase
DLDIKGPM_00206	CDS	438				hypothetical protein
DLDIKGPM_00207	CDS	606	mepS	3.4.-.-	COG0791	Murein DD-endopeptidase MepS/Murein LD-carboxypeptidase
DLDIKGPM_00208	CDS	918	metAA	2.3.1.31		Homoserine O-acetyltransferase
DLDIKGPM_00209	CDS	564	ves			Protein Ves
DLDIKGPM_00210	CDS	1371	proY		COG1113	Proline-specific permease ProY
DLDIKGPM_00211	CDS	1005				hypothetical protein
DLDIKGPM_00212	CDS	309	ftsB			Cell division protein FtsB
DLDIKGPM_00213	CDS	1089	prfA		COG0216	Peptide chain release factor RF1
DLDIKGPM_00214	CDS	1827	cpdB	3.1.3.6	COG0737	2',3'-cyclic-nucleotide 2'-phosphodiesterase/3'-nucleotidase
DLDIKGPM_00215	CDS	924	rpoS		COG0568	RNA polymerase sigma factor RpoS
DLDIKGPM_00216	CDS	420	nhaX		COG0589	Stress response protein NhaX
DLDIKGPM_00217	CDS	996	gapA	1.2.1.12	COG0057	Glyceraldehyde-3-phosphate dehydrogenase A
DLDIKGPM_00218	CDS	1491	pepA_2	3.4.11.1	COG0260	Cytosol aminopeptidase
DLDIKGPM_00219	CDS	1290	miaB	2.8.4.3	COG0621	tRNA-2-methylthio-N(6)-dimethylallyladenosine synthase
DLDIKGPM_00220	CDS	861	ywqG		COG3878	putative protein YwqG
DLDIKGPM_00221	CDS	768	yfiH	1.10.3.-	COG1496	Polyphenol oxidase
DLDIKGPM_00222	CDS	972	rluD	5.4.99.23	COG0564	Ribosomal large subunit pseudouridine synthase D
DLDIKGPM_00223	CDS	765	bamD		COG4105	Outer membrane protein assembly factor BamD
DLDIKGPM_00224	CDS	1263	waaA	2.4.99.12	COG1519	3-deoxy-D-manno-octulosonic acid transferase
DLDIKGPM_00225	CDS	693				hypothetical protein
DLDIKGPM_00226	CDS	426	msrB	1.8.4.12		Peptide methionine sulfoxide reductase MsrB
DLDIKGPM_00227	CDS	1296	tcyP_1		COG1823	L-cystine uptake protein TcyP
DLDIKGPM_00228	CDS	726				hypothetical protein
DLDIKGPM_00229	CDS	357				hypothetical protein
DLDIKGPM_00230	tRNA	77				tRNA-Arg(ccg)
DLDIKGPM_00231	CDS	396	nudG	3.6.1.65	COG0494	CTP pyrophosphohydrolase
DLDIKGPM_00232	CDS	2943	uvrB_1			UvrABC system protein B
DLDIKGPM_00233	CDS	867				hypothetical protein
DLDIKGPM_00234	CDS	549	folE	3.5.4.16	COG0302	GTP cyclohydrolase 1
DLDIKGPM_00235	CDS	282				hypothetical protein
DLDIKGPM_00236	CDS	1086	mutY	3.2.2.31	COG1194	Adenine DNA glycosylase
DLDIKGPM_00237	CDS	756	cmoM	2.1.1.-	COG0500	tRNA 5-carboxymethoxyuridine methyltransferase
DLDIKGPM_00238	CDS	450				hypothetical protein
DLDIKGPM_00239	CDS	912	ravA	3.6.3.-		ATPase RavA
DLDIKGPM_00240	CDS	888				hypothetical protein
DLDIKGPM_00241	CDS	2007	tgpA	2.3.2.13	COG1305	Protein-glutamine gamma-glutamyltransferase
DLDIKGPM_00242	CDS	225	slyX			Protein SlyX
DLDIKGPM_00243	CDS	588	fdoG	1.17.1.9	COG0243	Formate dehydrogenase-O major subunit
DLDIKGPM_00244	CDS	2430	fdnG	1.17.5.3	COG0243	Formate dehydrogenase, nitrate-inducible, major subunit
DLDIKGPM_00245	CDS	939	fdnH		COG0437	Formate dehydrogenase, nitrate-inducible, iron-sulfur subunit
DLDIKGPM_00246	CDS	666	fdoI		COG2864	Formate dehydrogenase, cytochrome b556(fdo) subunit
DLDIKGPM_00247	CDS	876	fdhE			Protein FdhE
DLDIKGPM_00248	CDS	3801				hypothetical protein
DLDIKGPM_00249	CDS	1383		1.18.1.2		Ferredoxin--NADP reductase
DLDIKGPM_00250	CDS	2124	btuB_1			Vitamin B12 transporter BtuB
DLDIKGPM_00251	CDS	819	COQ5	2.1.1.163		2-methoxy-6-polyprenyl-1,4-benzoquinol methylase, mitochondrial
DLDIKGPM_00252	CDS	756			COG1120	putative ABC transporter ATP-binding protein
DLDIKGPM_00253	CDS	987			COG0609	putative ABC transporter permease protein
DLDIKGPM_00254	CDS	1053	btuF_1			Vitamin B12-binding protein
DLDIKGPM_00255	CDS	675	yhhQ		COG1738	Queuosine precursor transporter
DLDIKGPM_00256	CDS	231				hypothetical protein
DLDIKGPM_00257	CDS	1164	ygiC	6.3.1.-	COG0754	Putative acid--amine ligase YgiC
DLDIKGPM_00258	CDS	714				hypothetical protein
DLDIKGPM_00259	CDS	324				hypothetical protein
DLDIKGPM_00260	CDS	666				hypothetical protein
DLDIKGPM_00261	CDS	726	lplA	6.3.1.20		Lipoate-protein ligase A
DLDIKGPM_00262	CDS	807				hypothetical protein
DLDIKGPM_00263	CDS	1962				hypothetical protein
DLDIKGPM_00264	CDS	1533	gpmI	5.4.2.12	COG0696	2,3-bisphosphoglycerate-independent phosphoglycerate mutase
DLDIKGPM_00265	CDS	1374	ctpA	3.4.21.102	COG0793	Carboxy-terminal processing protease CtpA
DLDIKGPM_00266	CDS	2817	uvrA		COG0178	UvrABC system protein A
DLDIKGPM_00267	CDS	444				hypothetical protein
DLDIKGPM_00268	CDS	1020	ilvE	2.6.1.42	COG0115	Branched-chain-amino-acid aminotransferase
DLDIKGPM_00269	CDS	3483	pycA	6.4.1.1		Pyruvate carboxylase
DLDIKGPM_00270	CDS	564	betI			HTH-type transcriptional regulator BetI
DLDIKGPM_00271	CDS	525				hypothetical protein
DLDIKGPM_00272	CDS	903	murQ	4.2.1.126	COG2103	N-acetylmuramic acid 6-phosphate etherase
DLDIKGPM_00273	CDS	1155	anmK	2.7.1.170	COG2377	Anhydro-N-acetylmuramic acid kinase
DLDIKGPM_00274	CDS	1884	rpoD		COG0568	RNA polymerase sigma factor RpoD
DLDIKGPM_00275	CDS	978	dusA	1.3.1.-	COG0042	tRNA-dihydrouridine(20/20a) synthase
DLDIKGPM_00276	CDS	1542				hypothetical protein
DLDIKGPM_00277	CDS	447	yqeY		COG1610	putative protein YqeY
DLDIKGPM_00278	CDS	1737	dnaG	2.7.7.-	COG0358	DNA primase
DLDIKGPM_00279	CDS	675				hypothetical protein
DLDIKGPM_00280	CDS	1851	ilvD	4.2.1.9	COG0129	Dihydroxy-acid dehydratase
DLDIKGPM_00281	CDS	348	yjcH		COG3162	Inner membrane protein YjcH
DLDIKGPM_00282	CDS	1710	actP_2		COG4147	Cation/acetate symporter ActP
DLDIKGPM_00283	CDS	843	rlmJ	2.1.1.266	COG2961	Ribosomal RNA large subunit methyltransferase J
DLDIKGPM_00284	CDS	885	ribN			Riboflavin transporter
DLDIKGPM_00285	CDS	903	era		COG1159	GTPase Era
DLDIKGPM_00286	CDS	675	rnc	3.1.26.3	COG0571	Ribonuclease 3
DLDIKGPM_00287	CDS	807	lepB	3.4.21.89	COG0681	Signal peptidase I
DLDIKGPM_00288	CDS	1791	lepA	3.6.5.-	COG0481	Elongation factor 4
DLDIKGPM_00289	CDS	1275				hypothetical protein
DLDIKGPM_00290	CDS	1425				hypothetical protein
DLDIKGPM_00291	CDS	351				hypothetical protein
DLDIKGPM_00292	CDS	840	rsmI	2.1.1.198	COG0313	Ribosomal RNA small subunit methyltransferase I
DLDIKGPM_00293	CDS	1230	yajR		COG0477	Inner membrane transport protein YajR
DLDIKGPM_00294	CDS	741	deoC	4.1.2.4	COG0274	Deoxyribose-phosphate aldolase
DLDIKGPM_00295	CDS	780	suhB	3.1.3.25	COG0483	Inositol-1-monophosphatase
DLDIKGPM_00296	CDS	786				hypothetical protein
DLDIKGPM_00297	CDS	1329	cpxA	2.7.13.3		Sensor histidine kinase CpxA
DLDIKGPM_00298	CDS	687	cpxR_1		COG0745	Transcriptional regulatory protein CpxR
DLDIKGPM_00299	CDS	411				hypothetical protein
DLDIKGPM_00300	CDS	282				hypothetical protein
DLDIKGPM_00301	CDS	606	mlaC		COG2854	Intermembrane phospholipid transport system binding protein MlaC
DLDIKGPM_00302	CDS	999	murB	1.3.1.98	COG0812	UDP-N-acetylenolpyruvoylglucosamine reductase
DLDIKGPM_00303	CDS	1215				hypothetical protein
DLDIKGPM_00304	CDS	1902	ppiD	5.2.1.8	COG0760	Peptidyl-prolyl cis-trans isomerase D
DLDIKGPM_00305	CDS	2571				hypothetical protein
DLDIKGPM_00306	CDS	1596	arnT	2.4.2.43		Undecaprenyl phosphate-alpha-4-amino-4-deoxy-L-arabinose arabinosyl transferase
DLDIKGPM_00307	CDS	411	fur		COG0735	Ferric uptake regulation protein
DLDIKGPM_00308	CDS	1050	fbp	3.1.3.11	COG0158	Fructose-1,6-bisphosphatase class 1
DLDIKGPM_00309	CDS	567	efp		COG0231	Elongation factor P
DLDIKGPM_00310	CDS	591	petA	7.1.1.8	COG0723	Ubiquinol-cytochrome c reductase iron-sulfur subunit
DLDIKGPM_00311	CDS	1275	petB		COG1290	Cytochrome b
DLDIKGPM_00312	CDS	828	petC		COG2857	Ammonia monooxygenase gamma subunit
DLDIKGPM_00313	CDS	600	sspA		COG0625	Stringent starvation protein A
DLDIKGPM_00314	CDS	468				hypothetical protein
DLDIKGPM_00315	CDS	537	ppa	3.6.1.1	COG0221	Inorganic pyrophosphatase
DLDIKGPM_00316	CDS	624				hypothetical protein
DLDIKGPM_00317	CDS	744	modA		COG0725	Molybdate-binding protein ModA
DLDIKGPM_00318	CDS	669	modB		COG4149	Molybdenum transport system permease protein ModB
DLDIKGPM_00319	CDS	672	cysA_2	7.3.2.3	COG1118	Sulfate/thiosulfate import ATP-binding protein CysA
DLDIKGPM_00320	CDS	387	crcB			Putative fluoride ion transporter CrcB
DLDIKGPM_00321	CDS	765	trmJ	2.1.1.-		tRNA (cytidine/uridine/adenosine-2'-O-)-methyltransferase TrmJ
DLDIKGPM_00322	CDS	771	cysE	2.3.1.30	COG1045	Serine acetyltransferase
DLDIKGPM_00323	CDS	1215	argG	6.3.4.5	COG0137	Argininosuccinate synthase
DLDIKGPM_00324	CDS	1389	trkA		COG0569	Trk system potassium uptake protein TrkA
DLDIKGPM_00325	CDS	651				hypothetical protein
DLDIKGPM_00326	CDS	426	nsrR		COG1959	HTH-type transcriptional repressor NsrR
DLDIKGPM_00327	CDS	1233	nadR_1		COG1056	Trifunctional NAD biosynthesis/regulator protein NadR
DLDIKGPM_00328	CDS	687	pnuC_1		COG3201	Nicotinamide riboside transporter PnuC
DLDIKGPM_00329	CDS	447	rplI		COG0359	50S ribosomal protein L9
DLDIKGPM_00330	CDS	225	rpsR		COG0238	30S ribosomal protein S18
DLDIKGPM_00331	CDS	363	rpsF		COG0360	30S ribosomal protein S6
DLDIKGPM_00332	CDS	795	psd	4.1.1.65	COG0688	Phosphatidylserine decarboxylase proenzyme
DLDIKGPM_00333	CDS	771	kdsB	2.7.7.38		3-deoxy-manno-octulosonate cytidylyltransferase
DLDIKGPM_00334	CDS	642	eda		COG0800	Putative KHG/KDPG aldolase
DLDIKGPM_00335	CDS	798	mepA_1	3.4.24.-	COG3770	Penicillin-insensitive murein endopeptidase
DLDIKGPM_00336	CDS	897	ddh	1.4.1.16		Meso-diaminopimelate D-dehydrogenase
DLDIKGPM_00337	CDS	963	hemH	4.99.1.1	COG0276	Ferrochelatase
DLDIKGPM_00338	CDS	1797	aspS	6.1.1.23	COG0173	Aspartate--tRNA(Asp/Asn) ligase
DLDIKGPM_00339	CDS	261				hypothetical protein
DLDIKGPM_00340	CDS	303	ihfB		COG0776	Integration host factor subunit beta
DLDIKGPM_00341	CDS	1665	rpsA		COG0539	30S ribosomal protein S1
DLDIKGPM_00342	CDS	678	cmk	2.7.4.25	COG0283	Cytidylate kinase
DLDIKGPM_00343	CDS	168				hypothetical protein
DLDIKGPM_00344	CDS	942	hemC	2.5.1.61	COG0181	Porphobilinogen deaminase
DLDIKGPM_00345	CDS	2307				hypothetical protein
DLDIKGPM_00346	CDS	1326	hemY		COG3071	Protein HemY
DLDIKGPM_00347	CDS	828	folP	2.5.1.15		Dihydropteroate synthase
DLDIKGPM_00348	CDS	1905	yheS		COG0488	putative ABC transporter ATP-binding protein YheS
DLDIKGPM_00349	CDS	402				hypothetical protein
DLDIKGPM_00350	CDS	1101				TelA-like protein
DLDIKGPM_00351	CDS	1116				hypothetical protein
DLDIKGPM_00352	CDS	1464				hypothetical protein
DLDIKGPM_00353	CDS	1887				hypothetical protein
DLDIKGPM_00354	CDS	1017				hypothetical protein
DLDIKGPM_00355	CDS	1143				hypothetical protein
DLDIKGPM_00356	CDS	2124	yccS_2		COG1289	Inner membrane protein YccS
DLDIKGPM_00357	CDS	1230	sotB		COG2814	Sugar efflux transporter
DLDIKGPM_00358	CDS	1050	gutB	1.1.1.-	COG1063	Sorbitol dehydrogenase
DLDIKGPM_00359	CDS	1395	fumC	4.2.1.2	COG0114	Fumarate hydratase class II
DLDIKGPM_00360	CDS	3399	pyrK			Dihydroorotate dehydrogenase B (NAD(+)), electron transfer subunit
DLDIKGPM_00361	CDS	1386	sdcS			Sodium-dependent dicarboxylate transporter SdcS
DLDIKGPM_00362	CDS	1005	hemB	4.2.1.24	COG0113	Delta-aminolevulinic acid dehydratase
DLDIKGPM_00363	CDS	1068	aroC	4.2.3.5		Chorismate synthase
DLDIKGPM_00364	CDS	1320	gltP_1		COG1301	Proton/glutamate-aspartate symporter
DLDIKGPM_00365	CDS	1233		2.7.2.4	COG0527	Aspartate kinase
DLDIKGPM_00366	CDS	720	yueD	1.1.1.320		Benzil reductase ((S)-benzoin forming)
DLDIKGPM_00367	CDS	435	rppH_1	3.6.1.-		RNA pyrophosphohydrolase
DLDIKGPM_00368	CDS	336	erpA		COG0316	Iron-sulfur cluster insertion protein ErpA
DLDIKGPM_00369	CDS	921	qmcA		COG0330	Protein QmcA
DLDIKGPM_00370	CDS	447	ybbJ		COG1585	Inner membrane protein YbbJ
DLDIKGPM_00371	CDS	1065				hypothetical protein
DLDIKGPM_00372	CDS	1368	der_1			GTPase Der
DLDIKGPM_00373	CDS	1449	pepD	3.4.13.18	COG2195	Cytosol non-specific dipeptidase
DLDIKGPM_00374	CDS	1713				hypothetical protein
DLDIKGPM_00375	CDS	1779				hypothetical protein
DLDIKGPM_00376	CDS	1056	lptG		COG0795	Lipopolysaccharide export system permease protein LptG
DLDIKGPM_00377	CDS	1068	lptF		COG0795	Lipopolysaccharide export system permease protein LptF
DLDIKGPM_00378	CDS	1113	tgt	2.4.2.29	COG0343	Queuine tRNA-ribosyltransferase
DLDIKGPM_00379	CDS	432	holC	2.7.7.7	COG2927	DNA polymerase III subunit chi
DLDIKGPM_00380	CDS	3423	smc_1			Chromosome partition protein Smc
DLDIKGPM_00381	CDS	339				hypothetical protein
DLDIKGPM_00382	CDS	1302				hypothetical protein
DLDIKGPM_00383	CDS	1506	cstA		COG1966	Peptide transporter CstA
DLDIKGPM_00384	CDS	888	metR			HTH-type transcriptional regulator MetR
DLDIKGPM_00385	CDS	2136	prc	3.4.21.102	COG0793	Tail-specific protease
DLDIKGPM_00386	CDS	1083	serC	2.6.1.52	COG1932	Phosphoserine aminotransferase
DLDIKGPM_00387	CDS	609	clpP	3.4.21.92	COG0740	ATP-dependent Clp protease proteolytic subunit
DLDIKGPM_00388	CDS	1299	clpX_1		COG1219	ATP-dependent Clp protease ATP-binding subunit ClpX
DLDIKGPM_00389	CDS	645	rnt	3.1.13.-	COG0847	Ribonuclease T
DLDIKGPM_00390	CDS	1563	gshA	6.3.2.2	COG2918	Glutamate--cysteine ligase
DLDIKGPM_00391	CDS	981	alx		COG0861	Putative membrane-bound redox modulator Alx
DLDIKGPM_00392	CDS	1317	adeQ		COG2252	Adenine permease AdeQ
DLDIKGPM_00393	CDS	1011	mdtA			Multidrug resistance protein MdtA
DLDIKGPM_00394	CDS	3057	bepE			Efflux pump membrane transporter BepE
DLDIKGPM_00395	CDS	555	olsG	2.1.1.344		Ornithine lipid N-methyltransferase
DLDIKGPM_00396	CDS	468	slyB_1		COG3133	Outer membrane lipoprotein SlyB
DLDIKGPM_00397	CDS	1290	gltP_2		COG1301	Proton/glutamate-aspartate symporter
DLDIKGPM_00398	CDS	1383	ppnN	3.2.2.-	COG1611	Pyrimidine/purine nucleotide 5'-monophosphate nucleosidase
DLDIKGPM_00399	CDS	774	yaaA		COG3022	Peroxide stress resistance protein YaaA
DLDIKGPM_00400	CDS	780				hypothetical protein
DLDIKGPM_00401	CDS	1263	pyrP			Uracil permease
DLDIKGPM_00402	CDS	561	tpd		COG3470	34 kDa membrane antigen
DLDIKGPM_00403	CDS	342				hypothetical protein
DLDIKGPM_00404	CDS	843	efeU		COG0672	Ferrous iron permease EfeU
DLDIKGPM_00405	CDS	897	efeO		COG2822	Iron uptake system component EfeO
DLDIKGPM_00406	CDS	1260	efeB	1.11.1.-	COG2837	Deferrochelatase/peroxidase EfeB
DLDIKGPM_00407	CDS	432		3.1.2.-	COG2050	Putative esterase
DLDIKGPM_00408	CDS	363				hypothetical protein
DLDIKGPM_00409	CDS	1098	mnmA	2.8.1.13	COG0482	tRNA-specific 2-thiouridylase MnmA
DLDIKGPM_00410	CDS	444				hypothetical protein
DLDIKGPM_00411	CDS	747	truA	5.4.99.12	COG0101	tRNA pseudouridine synthase A
DLDIKGPM_00412	CDS	858	hexR		COG1737	HTH-type transcriptional regulator HexR
DLDIKGPM_00413	CDS	978	glk	2.7.1.2	COG0837	Glucokinase
DLDIKGPM_00414	CDS	612	engB		COG0218	putative GTP-binding protein EngB
DLDIKGPM_00415	CDS	420				hypothetical protein
DLDIKGPM_00416	CDS	2097			COG1292	Glycine betaine transporter
DLDIKGPM_00417	CDS	849	purU	3.5.1.10	COG0788	Formyltetrahydrofolate deformylase
DLDIKGPM_00418	CDS	426	exbD_2		COG0848	Biopolymer transport protein ExbD
DLDIKGPM_00419	CDS	684	tolQ_1		COG0811	Tol-Pal system protein TolQ
DLDIKGPM_00420	CDS	690				hypothetical protein
DLDIKGPM_00421	CDS	801	dapB	1.17.1.8	COG0289	4-hydroxy-tetrahydrodipicolinate reductase
DLDIKGPM_00422	CDS	1533				hypothetical protein
DLDIKGPM_00423	CDS	1443	brnQ		COG1114	Branched-chain amino acid transport system 2 carrier protein
DLDIKGPM_00424	CDS	1017	pyrD	1.3.5.2	COG0167	Dihydroorotate dehydrogenase (quinone)
DLDIKGPM_00425	CDS	744	recO		COG1381	DNA repair protein RecO
DLDIKGPM_00426	CDS	456	mlaD		COG1463	Intermembrane phospholipid transport system binding protein MlaD
DLDIKGPM_00427	CDS	648	rnhB	3.1.26.4	COG0164	Ribonuclease HII
DLDIKGPM_00428	CDS	1134	lpxB	2.4.1.182	COG0763	Lipid-A-disaccharide synthase
DLDIKGPM_00429	CDS	789	lpxA	2.3.1.129	COG1043	Acyl-[acyl-carrier-protein]--UDP-N-acetylglucosamine O-acyltransferase
DLDIKGPM_00430	CDS	441	fabZ	4.2.1.59		3-hydroxyacyl-[acyl-carrier-protein] dehydratase FabZ
DLDIKGPM_00431	CDS	1035	lpxD	2.3.1.191	COG1044	UDP-3-O-(3-hydroxymyristoyl)glucosamine N-acyltransferase
DLDIKGPM_00432	CDS	510	skp		COG2825	Chaperone protein Skp
DLDIKGPM_00433	CDS	2391	bamA		COG4775	Outer membrane protein assembly factor BamA
DLDIKGPM_00434	CDS	1350	rseP	3.4.24.-	COG0750	Regulator of sigma-E protease RseP
DLDIKGPM_00435	CDS	1176	dxr	1.1.1.267	COG0743	1-deoxy-D-xylulose 5-phosphate reductoisomerase
DLDIKGPM_00436	CDS	810				hypothetical protein
DLDIKGPM_00437	CDS	720	ispU	2.5.1.31	COG0020	Ditrans,polycis-undecaprenyl-diphosphate synthase ((2E,6E)-farnesyl-diphosphate specific)
DLDIKGPM_00438	CDS	546	frr		COG0233	Ribosome-recycling factor
DLDIKGPM_00439	CDS	720	pyrH	2.7.4.22	COG0528	Uridylate kinase
DLDIKGPM_00440	CDS	2424	rnr	3.1.13.1	COG0557	Ribonuclease R
DLDIKGPM_00441	CDS	1011	lpxK	2.7.1.130	COG1663	Tetraacyldisaccharide 4'-kinase
DLDIKGPM_00442	CDS	399	recX		COG2137	Regulatory protein RecX
DLDIKGPM_00443	CDS	576				hypothetical protein
DLDIKGPM_00444	CDS	1626				hypothetical protein
DLDIKGPM_00445	CDS	2895			COG0247	putative protein
DLDIKGPM_00446	CDS	1125	zapE		COG1485	Cell division protein ZapE
DLDIKGPM_00447	CDS	456	tadA	3.5.4.33	COG0590	tRNA-specific adenosine deaminase
DLDIKGPM_00448	CDS	561				hypothetical protein
DLDIKGPM_00449	CDS	837	proC	1.5.1.2	COG0345	Pyrroline-5-carboxylate reductase
DLDIKGPM_00450	tRNA	76				tRNA-Gly(gcc)
DLDIKGPM_00451	CDS	987				hypothetical protein
DLDIKGPM_00452	CDS	1197	rbbA_1		COG0842	Ribosome-associated ATPase
DLDIKGPM_00453	CDS	1185	lnrN		COG0842	Linearmycin resistance permease protein LnrN
DLDIKGPM_00454	CDS	1428				hypothetical protein
DLDIKGPM_00455	CDS	711	rspR		COG1802	HTH-type transcriptional repressor RspR
DLDIKGPM_00456	CDS	1215	lhgD	1.1.5.-	COG0579	L-2-hydroxyglutarate dehydrogenase
DLDIKGPM_00457	CDS	1389	gabD_3	1.2.1.79	COG1012	Succinate-semialdehyde dehydrogenase [NADP(+)]
DLDIKGPM_00458	CDS	1305	davT_2	2.6.1.48	COG0160	5-aminovalerate aminotransferase DavT
DLDIKGPM_00459	CDS	1380	yhdG		COG0531	putative amino acid permease YhdG
DLDIKGPM_00460	CDS	1641	groL		COG0459	60 kDa chaperonin
DLDIKGPM_00461	CDS	291	groS		COG0234	10 kDa chaperonin
DLDIKGPM_00462	CDS	2178	cadA	3.6.3.3		Cadmium-transporting ATPase
DLDIKGPM_00463	CDS	429	zntR		COG0789	HTH-type transcriptional regulator ZntR
DLDIKGPM_00464	CDS	918	glaH	1.14.11.-		Glutarate 2-hydroxylase
DLDIKGPM_00465	CDS	321				hypothetical protein
DLDIKGPM_00466	CDS	618	lolA			Outer-membrane lipoprotein carrier protein
DLDIKGPM_00467	CDS	1317	rarA		COG2256	Replication-associated recombination protein A
DLDIKGPM_00468	CDS	633	tenI	5.3.99.10	COG0352	Thiazole tautomerase
DLDIKGPM_00469	CDS	207	thiS		COG2104	Sulfur carrier protein ThiS
DLDIKGPM_00470	CDS	768	thiG	2.8.1.10	COG2022	Thiazole synthase
DLDIKGPM_00471	CDS	1029				hypothetical protein
DLDIKGPM_00472	CDS	1479	yflS		COG0471	Putative malate transporter YflS
DLDIKGPM_00473	CDS	1623	prpR		COG1221	Propionate catabolism operon regulatory protein
DLDIKGPM_00474	CDS	888	prpB	4.1.3.30	COG2513	2-methylisocitrate lyase
DLDIKGPM_00475	CDS	1161	prpC	2.3.3.5	COG0372	2-methylcitrate synthase
DLDIKGPM_00476	CDS	1428	prpD	4.2.1.79	COG2079	2-methylcitrate dehydratase
DLDIKGPM_00477	CDS	1017	ynaI		COG0668	Low conductance mechanosensitive channel YnaI
DLDIKGPM_00478	CDS	1017				hypothetical protein
DLDIKGPM_00479	CDS	672	estB	3.1.1.1	COG0400	Carboxylesterase 2
DLDIKGPM_00480	CDS	297	phnX	3.11.1.1		Phosphonoacetaldehyde hydrolase
DLDIKGPM_00481	CDS	702	nagK	3.7.1.20		Fumarylpyruvate hydrolase
DLDIKGPM_00482	CDS	888				hypothetical protein
DLDIKGPM_00483	CDS	312				hypothetical protein
DLDIKGPM_00484	CDS	1428	prr	1.2.1.19	COG1012	Gamma-aminobutyraldehyde dehydrogenase
DLDIKGPM_00485	CDS	1359	patA_2	2.6.1.82	COG4992	Putrescine aminotransferase
DLDIKGPM_00486	CDS	1446	mleN_1		COG1757	Malate-2H(+)/Na(+)-lactate antiporter
DLDIKGPM_00487	CDS	1137	iscS_2	2.8.1.7	COG1104	Cysteine desulfurase IscS
DLDIKGPM_00488	CDS	933				hypothetical protein
DLDIKGPM_00489	CDS	3327				hypothetical protein
DLDIKGPM_00490	CDS	834				hypothetical protein
DLDIKGPM_00491	CDS	2313				hypothetical protein
DLDIKGPM_00492	CDS	525				hypothetical protein
DLDIKGPM_00493	CDS	2160	recF_1			DNA replication and repair protein RecF
DLDIKGPM_00494	CDS	237				hypothetical protein
DLDIKGPM_00495	CDS	2223	uvrB_2			UvrABC system protein B
DLDIKGPM_00496	CDS	570				hypothetical protein
DLDIKGPM_00497	CDS	1518				hypothetical protein
DLDIKGPM_00498	CDS	636				hypothetical protein
DLDIKGPM_00499	CDS	996				hypothetical protein
DLDIKGPM_00500	CDS	1917				hypothetical protein
DLDIKGPM_00501	CDS	1533	recF_2			DNA replication and repair protein RecF
DLDIKGPM_00502	CDS	3099	hsdR	3.1.21.3		Type I restriction enzyme EcoR124II R protein
DLDIKGPM_00503	CDS	435				hypothetical protein
DLDIKGPM_00504	CDS	1014				hypothetical protein
DLDIKGPM_00505	CDS	1224				hypothetical protein
DLDIKGPM_00506	CDS	1002				hypothetical protein
DLDIKGPM_00507	CDS	1551	prmC_1	2.1.1.297		Release factor glutamine methyltransferase
DLDIKGPM_00508	CDS	996	xerD_1			Tyrosine recombinase XerD
DLDIKGPM_00509	CDS	192				hypothetical protein
DLDIKGPM_00510	CDS	1791				hypothetical protein
DLDIKGPM_00511	CDS	171				hypothetical protein
DLDIKGPM_00512	CDS	321				hypothetical protein
DLDIKGPM_00513	CDS	291				hypothetical protein
DLDIKGPM_00514	CDS	525				hypothetical protein
DLDIKGPM_00515	tRNA	86				tRNA-Leu(caa)
DLDIKGPM_00516	CDS	1632	nfdA	3.5.1.91		N-substituted formamide deformylase
DLDIKGPM_00517	CDS	879	pdxY	2.7.1.35	COG2240	Pyridoxal kinase PdxY
DLDIKGPM_00518	CDS	309				hypothetical protein
DLDIKGPM_00519	CDS	615	sodA	1.15.1.1		Superoxide dismutase [Mn]
DLDIKGPM_00520	CDS	522				hypothetical protein
DLDIKGPM_00521	CDS	1635				hypothetical protein
DLDIKGPM_00522	tRNA	85				tRNA-Tyr(gta)
DLDIKGPM_00523	tRNA	74				tRNA-Gly(tcc)
DLDIKGPM_00524	tRNA	76				tRNA-Thr(ggt)
DLDIKGPM_00525	CDS	1191	tufA_1		COG0050	Elongation factor Tu
DLDIKGPM_00526	tRNA	76				tRNA-Trp(cca)
DLDIKGPM_00527	CDS	393	secE			Protein translocase subunit SecE
DLDIKGPM_00528	CDS	528	nusG		COG0250	Transcription termination/antitermination protein NusG
DLDIKGPM_00529	CDS	432	rplK		COG0080	50S ribosomal protein L11
DLDIKGPM_00530	CDS	693	rplA		COG0081	50S ribosomal protein L1
DLDIKGPM_00531	CDS	504	rplJ		COG0244	50S ribosomal protein L10
DLDIKGPM_00532	CDS	369	rplL			50S ribosomal protein L7/L12
DLDIKGPM_00533	CDS	4119	rpoB	2.7.7.6		DNA-directed RNA polymerase subunit beta
DLDIKGPM_00534	CDS	4158	rpoC	2.7.7.6	COG0086	DNA-directed RNA polymerase subunit beta'
DLDIKGPM_00535	CDS	432	nusB			Transcription antitermination protein NusB
DLDIKGPM_00536	CDS	1119	pilT_1		COG2805	Twitching mobility protein
DLDIKGPM_00537	CDS	741	tcdA	6.1.-.-	COG1179	tRNA threonylcarbamoyladenosine dehydratase
DLDIKGPM_00538	CDS	642				hypothetical protein
DLDIKGPM_00539	CDS	633	gmk	2.7.4.8	COG0194	Guanylate kinase
DLDIKGPM_00540	CDS	261	rpoZ	2.7.7.6		DNA-directed RNA polymerase subunit omega
DLDIKGPM_00541	CDS	2199	spoT	3.1.7.2	COG0317	Guanosine-3',5'-bis(diphosphate) 3'-pyrophosphohydrolase
DLDIKGPM_00542	CDS	2355	rcsC_1	2.7.13.3		Sensor histidine kinase RcsC
DLDIKGPM_00543	CDS	1218	roxA	1.14.11.47	COG2850	50S ribosomal protein L16 3-hydroxylase
DLDIKGPM_00544	CDS	486				hypothetical protein
DLDIKGPM_00545	CDS	267	rpsO		COG0184	30S ribosomal protein S15
DLDIKGPM_00546	CDS	2100	pnp	2.7.7.8	COG1185	Polyribonucleotide nucleotidyltransferase
DLDIKGPM_00547	CDS	174				hypothetical protein
DLDIKGPM_00548	CDS	984	acuI	1.3.1.84	COG0604	Acrylyl-CoA reductase AcuI
DLDIKGPM_00549	CDS	576	rppH_2	3.6.1.-	COG0494	RNA pyrophosphohydrolase
DLDIKGPM_00550	CDS	759	cysZ		COG2981	Sulfate transporter CysZ
DLDIKGPM_00551	CDS	738	mipA_1		COG3713	MltA-interacting protein
DLDIKGPM_00552	CDS	573	tag	3.2.2.20	COG2818	DNA-3-methyladenine glycosylase 1
DLDIKGPM_00553	CDS	465	bfr_1	1.16.3.1	COG2193	Bacterioferritin
DLDIKGPM_00554	CDS	471	bfr_2	1.16.3.1	COG2193	Bacterioferritin
DLDIKGPM_00555	CDS	867	hcpC	3.5.2.6	COG0790	Putative beta-lactamase HcpC
DLDIKGPM_00556	CDS	903	tsdA_1	1.8.2.2	COG3258	Thiosulfate dehydrogenase
DLDIKGPM_00557	CDS	1362	adhB_1	1.1.5.5		Alcohol dehydrogenase (quinone), cytochrome c subunit
DLDIKGPM_00558	CDS	2247	hemR		COG1629	Hemin receptor
DLDIKGPM_00559	CDS	867	btuF_2			Vitamin B12-binding protein
DLDIKGPM_00560	CDS	969	hmuU_1		COG0609	Hemin transport system permease protein HmuU
DLDIKGPM_00561	CDS	810	hmuV	3.6.3.-	COG4559	Hemin import ATP-binding protein HmuV
DLDIKGPM_00562	CDS	2610	gyrA	5.6.2.2	COG0188	DNA gyrase subunit A
DLDIKGPM_00563	CDS	666				hypothetical protein
DLDIKGPM_00564	CDS	1359	norM		COG0534	Multidrug resistance protein NorM
DLDIKGPM_00565	CDS	1503	nnr		COG0062	Bifunctional NAD(P)H-hydrate repair enzyme Nnr
DLDIKGPM_00566	CDS	462				hypothetical protein
DLDIKGPM_00567	CDS	657				hypothetical protein
DLDIKGPM_00568	CDS	1083	apbC		COG0489	Iron-sulfur cluster carrier protein
DLDIKGPM_00569	CDS	570	dcd	3.5.4.13		dCTP deaminase
DLDIKGPM_00570	CDS	768	map	3.4.11.18	COG0024	Methionine aminopeptidase
DLDIKGPM_00571	CDS	1170	ubiH	1.14.13.-	COG0654	2-octaprenyl-6-methoxyphenol hydroxylase
DLDIKGPM_00572	CDS	1209	ubiI	1.14.13.240	COG0654	2-octaprenylphenol hydroxylase
DLDIKGPM_00573	CDS	339				hypothetical protein
DLDIKGPM_00574	CDS	291	zapA		COG3027	Cell division protein ZapA
DLDIKGPM_00575	CDS	411				hypothetical protein
DLDIKGPM_00576	CDS	990				hypothetical protein
DLDIKGPM_00577	CDS	450				hypothetical protein
DLDIKGPM_00578	CDS	486	moaC	4.6.1.17	COG0315	Cyclic pyranopterin monophosphate synthase
DLDIKGPM_00579	CDS	501	yceD		COG1399	Large ribosomal RNA subunit accumulation protein YceD
DLDIKGPM_00580	CDS	195	rpmF		COG0333	50S ribosomal protein L32
DLDIKGPM_00581	CDS	1056	plsX	2.3.1.274	COG0416	Phosphate acyltransferase
DLDIKGPM_00582	CDS	954	fabH	2.3.1.180	COG0332	3-oxoacyl-[acyl-carrier-protein] synthase 3
DLDIKGPM_00583	CDS	945	fabD	2.3.1.39	COG0331	Malonyl CoA-acyl carrier protein transacylase
DLDIKGPM_00584	CDS	576	yciB		COG2917	Intracellular septation protein
DLDIKGPM_00585	CDS	270	bolA		COG0271	DNA-binding transcriptional regulator BolA
DLDIKGPM_00586	CDS	825	cbf2	5.2.1.8	COG0760	Putative peptidyl-prolyl cis-trans isomerase Cbf2
DLDIKGPM_00587	CDS	999	sohB	3.4.21.-	COG0616	putative protease SohB
DLDIKGPM_00588	CDS	2163	priA	3.6.4.-	COG1198	Primosomal protein N'
DLDIKGPM_00589	CDS	516				hypothetical protein
DLDIKGPM_00590	CDS	597				hypothetical protein
DLDIKGPM_00591	CDS	744	coaX	2.7.1.33	COG1521	Type III pantothenate kinase
DLDIKGPM_00592	CDS	960	birA	6.3.4.15	COG0340	Bifunctional ligase/repressor BirA
DLDIKGPM_00593	CDS	99				hypothetical protein
DLDIKGPM_00594	CDS	1203	tyrB	2.6.1.57	COG1448	Aromatic-amino-acid aminotransferase
DLDIKGPM_00595	CDS	1806				hypothetical protein
DLDIKGPM_00596	CDS	2082	ppk	2.7.4.1		Polyphosphate kinase
DLDIKGPM_00597	CDS	1413				hypothetical protein
DLDIKGPM_00598	CDS	2856	rne	3.1.26.12		Ribonuclease E
DLDIKGPM_00599	CDS	747				hypothetical protein
DLDIKGPM_00600	CDS	2379	mrcB		COG0744	Penicillin-binding protein 1B
DLDIKGPM_00601	CDS	846	corC		COG4535	Magnesium and cobalt efflux protein CorC
DLDIKGPM_00602	tRNA	77				tRNA-Asn(gtt)
DLDIKGPM_00603	CDS	399	ybgC	3.1.2.-	COG0824	Acyl-CoA thioesterase YbgC
DLDIKGPM_00604	CDS	708	tolQ_2		COG0811	Tol-Pal system protein TolQ
DLDIKGPM_00605	CDS	432	tolR		COG0848	Tol-Pal system protein TolR
DLDIKGPM_00606	CDS	1128				hypothetical protein
DLDIKGPM_00607	CDS	1437	oprM		COG1538	Outer membrane protein OprM
DLDIKGPM_00608	tRNA	77				tRNA-Pro(ggg)
DLDIKGPM_00609	CDS	219	infA		COG0361	Translation initiation factor IF-1
DLDIKGPM_00610	CDS	714	rph	2.7.7.56		Ribonuclease PH
DLDIKGPM_00611	CDS	732	sfsA		COG1489	Sugar fermentation stimulation protein A
DLDIKGPM_00612	CDS	615	hflD		COG2915	High frequency lysogenization protein HflD
DLDIKGPM_00613	CDS	954	kamA	5.4.3.2		L-lysine 2,3-aminomutase
DLDIKGPM_00614	CDS	939	miaA	2.5.1.75	COG0324	tRNA dimethylallyltransferase
DLDIKGPM_00615	CDS	975				hypothetical protein
DLDIKGPM_00616	tRNA	77				tRNA-Asn(gtt)
DLDIKGPM_00617	CDS	1566	abgT_1		COG2978	p-aminobenzoyl-glutamate transport protein
DLDIKGPM_00618	CDS	654				hypothetical protein
DLDIKGPM_00619	CDS	1047	argC	1.2.1.38	COG0002	N-acetyl-gamma-glutamyl-phosphate reductase
DLDIKGPM_00620	CDS	1218	argJ		COG1364	Arginine biosynthesis bifunctional protein ArgJ
DLDIKGPM_00621	CDS	897	argB	2.7.2.8	COG0548	Acetylglutamate kinase
DLDIKGPM_00622	CDS	1173	argD	2.6.1.11	COG4992	Acetylornithine aminotransferase
DLDIKGPM_00623	CDS	693				hypothetical protein
DLDIKGPM_00624	CDS	543	adk	2.7.4.3	COG0563	Adenylate kinase
DLDIKGPM_00625	CDS	1239	guaA_1	6.3.5.2		GMP synthase [glutamine-hydrolyzing]
DLDIKGPM_00626	CDS	1503	abgT_2		COG2978	p-aminobenzoyl-glutamate transport protein
DLDIKGPM_00627	CDS	1173	hipO_2	3.5.1.32	COG1473	Hippurate hydrolase
DLDIKGPM_00628	CDS	1458	aspA	4.3.1.1	COG1027	Aspartate ammonia-lyase
DLDIKGPM_00629	CDS	441	cymR_1			HTH-type transcriptional regulator CymR
DLDIKGPM_00630	CDS	936	cysK1	2.5.1.47	COG0031	O-acetylserine sulfhydrylase
DLDIKGPM_00631	CDS	660				hypothetical protein
DLDIKGPM_00632	CDS	681				hypothetical protein
DLDIKGPM_00633	CDS	729	glnQ			Glutamine transport ATP-binding protein GlnQ
DLDIKGPM_00634	CDS	831	glnH		COG0834	ABC transporter glutamine-binding protein GlnH
DLDIKGPM_00635	CDS	528				hypothetical protein
DLDIKGPM_00636	CDS	1197			COG2081	putative protein
DLDIKGPM_00637	CDS	390	panD	4.1.1.11	COG0853	Aspartate 1-decarboxylase
DLDIKGPM_00638	CDS	1776	thiC	4.1.99.17	COG0422	Phosphomethylpyrimidine synthase
DLDIKGPM_00639	CDS	1392				hypothetical protein
DLDIKGPM_00640	CDS	396				hypothetical protein
DLDIKGPM_00641	CDS	366	hdeA			Acid stress chaperone HdeA
DLDIKGPM_00642	CDS	1080				hypothetical protein
DLDIKGPM_00643	CDS	771				hypothetical protein
DLDIKGPM_00644	CDS	864	mltC	4.2.2.-		Membrane-bound lytic murein transglycosylase C
DLDIKGPM_00645	CDS	789	nimR_2			HTH-type transcriptional regulator NimR
DLDIKGPM_00646	CDS	927				hypothetical protein
DLDIKGPM_00647	CDS	1095				hypothetical protein
DLDIKGPM_00648	CDS	1320	proP_1			Proline/betaine transporter
DLDIKGPM_00649	CDS	717				hypothetical protein
DLDIKGPM_00650	CDS	915	gcvA			Glycine cleavage system transcriptional activator
DLDIKGPM_00651	CDS	1557	ilvG	2.2.1.6		Acetolactate synthase isozyme 2 large subunit
DLDIKGPM_00652	CDS	1299	puuB	1.4.3.-		Gamma-glutamylputrescine oxidoreductase
DLDIKGPM_00653	CDS	1035		1.5.1.49	COG2055	Delta(1)-pyrroline-2-carboxylate reductase 1
DLDIKGPM_00654	CDS	1494	gabD_4	1.2.1.79	COG1012	Succinate-semialdehyde dehydrogenase [NADP(+)]
DLDIKGPM_00655	CDS	1119				hypothetical protein
DLDIKGPM_00656	CDS	2097	ftsH_1	3.4.24.-		ATP-dependent zinc metalloprotease FtsH
DLDIKGPM_00657	CDS	669	ccmB		COG2386	Heme exporter protein B
DLDIKGPM_00658	CDS	636	ccmA	7.6.2.5	COG4133	Cytochrome c biogenesis ATP-binding export protein CcmA
DLDIKGPM_00659	CDS	1728				hypothetical protein
DLDIKGPM_00660	CDS	459	ccmH		COG3088	Cytochrome c-type biogenesis protein CcmH
DLDIKGPM_00661	CDS	552	dsbE		COG0526	Thiol:disulfide interchange protein DsbE
DLDIKGPM_00662	CDS	1983	ccmF		COG1138	Cytochrome c-type biogenesis protein CcmF
DLDIKGPM_00663	CDS	471	ccmE		COG2332	Cytochrome c-type biogenesis protein CcmE
DLDIKGPM_00664	CDS	174				hypothetical protein
DLDIKGPM_00665	CDS	741	ccmC		COG0755	Heme exporter protein C
DLDIKGPM_00666	CDS	519	dhfrIII	1.5.1.3		Dihydrofolate reductase type 3
DLDIKGPM_00667	CDS	2142	aas_1		COG0204	Bifunctional protein Aas
DLDIKGPM_00668	CDS	1179	lplT			Lysophospholipid transporter LplT
DLDIKGPM_00669	CDS	615				hypothetical protein
DLDIKGPM_00670	CDS	375				hypothetical protein
DLDIKGPM_00671	CDS	528				hypothetical protein
DLDIKGPM_00672	CDS	303	yhbY		COG1534	RNA-binding protein YhbY
DLDIKGPM_00673	CDS	711	rsuA_1	5.4.99.19	COG1187	Ribosomal small subunit pseudouridine synthase A
DLDIKGPM_00674	CDS	636	rlmE	2.1.1.166	COG0293	Ribosomal RNA large subunit methyltransferase E
DLDIKGPM_00675	CDS	1878	ftsH_2	3.4.24.-	COG0465	ATP-dependent zinc metalloprotease FtsH
DLDIKGPM_00676	CDS	468	lrp		COG1522	Leucine-responsive regulatory protein
DLDIKGPM_00677	CDS	618	argO			Arginine exporter protein ArgO
DLDIKGPM_00678	CDS	1302	adeP		COG2252	Adenine permease AdeP
DLDIKGPM_00679	CDS	1803	adeC	3.5.4.2		Adenine deaminase
DLDIKGPM_00680	CDS	1743	ade	3.5.4.2	COG1001	Adenine deaminase
DLDIKGPM_00681	CDS	1455				hypothetical protein
DLDIKGPM_00682	CDS	804	lapB_1			Lipopolysaccharide assembly protein B
DLDIKGPM_00683	CDS	1269	potE			Putrescine transporter PotE
DLDIKGPM_00684	CDS	1497	gadC_1		COG0531	putative glutamate/gamma-aminobutyrate antiporter
DLDIKGPM_00685	CDS	1848	hdc	4.1.1.22		Histidine decarboxylase
DLDIKGPM_00686	CDS	1338	rstB	2.7.13.3		Sensor protein RstB
DLDIKGPM_00687	CDS	681	rstA		COG0745	Transcriptional regulatory protein RstA
DLDIKGPM_00688	CDS	654	mtnX	3.1.3.87	COG4359	2-hydroxy-3-keto-5-methylthiopentenyl-1-phosphate phosphatase
DLDIKGPM_00689	CDS	828		3.1.1.23		Thermostable monoacylglycerol lipase
DLDIKGPM_00690	CDS	360	arnE_1			4-amino-4-deoxy-L-arabinose-phosphoundecaprenol flippase subunit ArnE
DLDIKGPM_00691	CDS	414	arnE_2			4-amino-4-deoxy-L-arabinose-phosphoundecaprenol flippase subunit ArnE
DLDIKGPM_00692	CDS	858				hypothetical protein
DLDIKGPM_00693	CDS	1074				hypothetical protein
DLDIKGPM_00694	CDS	1386	davT_3	2.6.1.48	COG0160	5-aminovalerate aminotransferase DavT
DLDIKGPM_00695	CDS	741	mipA_2		COG3713	MltA-interacting protein
DLDIKGPM_00696	CDS	597				hypothetical protein
DLDIKGPM_00697	CDS	405				hypothetical protein
DLDIKGPM_00698	CDS	1917	thrS	6.1.1.3	COG0441	Threonine--tRNA ligase
DLDIKGPM_00699	CDS	462	infC		COG0290	Translation initiation factor IF-3
DLDIKGPM_00700	CDS	198	rpmI		COG0291	50S ribosomal protein L35
DLDIKGPM_00701	CDS	357	rplT		COG0292	50S ribosomal protein L20
DLDIKGPM_00702	CDS	1014	pheS	6.1.1.20	COG0016	Phenylalanine--tRNA ligase alpha subunit
DLDIKGPM_00703	CDS	2367	pheT	6.1.1.20	COG0072	Phenylalanine--tRNA ligase beta subunit
DLDIKGPM_00704	CDS	303	ihfA		COG0776	Integration host factor subunit alpha
DLDIKGPM_00705	CDS	1854	dxs	2.2.1.7	COG1154	1-deoxy-D-xylulose-5-phosphate synthase
DLDIKGPM_00706	CDS	864		2.5.1.10		Farnesyl diphosphate synthase
DLDIKGPM_00707	CDS	285	xseB	3.1.11.6	COG1722	Exodeoxyribonuclease 7 small subunit
DLDIKGPM_00708	CDS	2289				hypothetical protein
DLDIKGPM_00709	CDS	894	glyQ	6.1.1.14	COG0752	Glycine--tRNA ligase alpha subunit
DLDIKGPM_00710	CDS	762				hypothetical protein
DLDIKGPM_00711	CDS	771	hisN	3.1.3.15	COG0483	Histidinol-phosphatase
DLDIKGPM_00712	CDS	681				hypothetical protein
DLDIKGPM_00713	tRNA	91				tRNA-Ser(gga)
DLDIKGPM_00714	CDS	324				hypothetical protein
DLDIKGPM_00715	CDS	366				hypothetical protein
DLDIKGPM_00716	CDS	606				hypothetical protein
DLDIKGPM_00717	CDS	477	smpB		COG0691	SsrA-binding protein
DLDIKGPM_00718	CDS	363				hypothetical protein
DLDIKGPM_00719	tRNA	77				tRNA-Arg(acg)
DLDIKGPM_00720	tRNA	77				tRNA-Arg(acg)
DLDIKGPM_00721	tRNA	76				tRNA-Val(tac)
DLDIKGPM_00722	CDS	1353	xanP		COG2233	Xanthine permease XanP
DLDIKGPM_00723	CDS	1215	lysN	2.6.1.39	COG1167	2-aminoadipate transaminase
DLDIKGPM_00724	CDS	351	yffB		COG1393	Protein YffB
DLDIKGPM_00725	CDS	1794	selB		COG3276	Selenocysteine-specific elongation factor
DLDIKGPM_00726	CDS	1344	selA	2.9.1.1	COG1921	L-seryl-tRNA(Sec) selenium transferase
DLDIKGPM_00727	tRNA	90				tRNA-SeC(tca)
DLDIKGPM_00728	CDS	528	pitA_1	2.3.1.-	COG1247	L-methionine sulfoximine/L-methionine sulfone acetyltransferase
DLDIKGPM_00729	CDS	1236	bcr			Bicyclomycin resistance protein
DLDIKGPM_00730	CDS	567	slmA			Nucleoid occlusion factor SlmA
DLDIKGPM_00731	CDS	1056	dinB	2.7.7.7	COG0389	DNA polymerase IV
DLDIKGPM_00732	CDS	204				hypothetical protein
DLDIKGPM_00733	CDS	840				hypothetical protein
DLDIKGPM_00734	CDS	1029				hypothetical protein
DLDIKGPM_00735	CDS	780	fdhD		COG1526	Sulfur carrier protein FdhD
DLDIKGPM_00736	CDS	375	rpsL		COG0048	30S ribosomal protein S12
DLDIKGPM_00737	CDS	471	rpsG		COG0049	30S ribosomal protein S7
DLDIKGPM_00738	CDS	2097	fusA		COG0480	Elongation factor G
DLDIKGPM_00739	CDS	1191	tufA_2		COG0050	Elongation factor Tu
DLDIKGPM_00740	CDS	312	rpsJ		COG0051	30S ribosomal protein S10
DLDIKGPM_00741	CDS	645	rplC		COG0087	50S ribosomal protein L3
DLDIKGPM_00742	CDS	606	rplD		COG0088	50S ribosomal protein L4
DLDIKGPM_00743	CDS	303	rplW		COG0089	50S ribosomal protein L23
DLDIKGPM_00744	CDS	825	rplB		COG0090	50S ribosomal protein L2
DLDIKGPM_00745	CDS	273	rpsS		COG0185	30S ribosomal protein S19
DLDIKGPM_00746	CDS	327	rplV		COG0091	50S ribosomal protein L22
DLDIKGPM_00747	CDS	690	rpsC		COG0092	30S ribosomal protein S3
DLDIKGPM_00748	CDS	414	rplP		COG0197	50S ribosomal protein L16
DLDIKGPM_00749	CDS	207	rpmC		COG0255	50S ribosomal protein L29
DLDIKGPM_00750	CDS	267	rpsQ		COG0186	30S ribosomal protein S17
DLDIKGPM_00751	CDS	369	rplN		COG0093	50S ribosomal protein L14
DLDIKGPM_00752	CDS	342				hypothetical protein
DLDIKGPM_00753	CDS	540	rplE		COG0094	50S ribosomal protein L5
DLDIKGPM_00754	CDS	306	rpsN		COG0199	30S ribosomal protein S14
DLDIKGPM_00755	CDS	396	rpsH		COG0096	30S ribosomal protein S8
DLDIKGPM_00756	CDS	537	rplF		COG0097	50S ribosomal protein L6
DLDIKGPM_00757	CDS	357	rplR		COG0256	50S ribosomal protein L18
DLDIKGPM_00758	CDS	516	rpsE		COG0098	30S ribosomal protein S5
DLDIKGPM_00759	CDS	180	rpmD		COG1841	50S ribosomal protein L30
DLDIKGPM_00760	CDS	435	rplO		COG0200	50S ribosomal protein L15
DLDIKGPM_00761	CDS	1422	secY		COG0201	Protein translocase subunit SecY
DLDIKGPM_00762	CDS	357	rpsM		COG0099	30S ribosomal protein S13
DLDIKGPM_00763	CDS	390	rpsK		COG0100	30S ribosomal protein S11
DLDIKGPM_00764	CDS	624	rpsD		COG0522	30S ribosomal protein S4
DLDIKGPM_00765	CDS	999	rpoA	2.7.7.6		DNA-directed RNA polymerase subunit alpha
DLDIKGPM_00766	CDS	378	rplQ		COG0203	50S ribosomal protein L17
DLDIKGPM_00767	CDS	936	ribF		COG0196	Bifunctional riboflavin kinase/FMN adenylyltransferase
DLDIKGPM_00768	CDS	2847	ileS	6.1.1.5	COG0060	Isoleucine--tRNA ligase
DLDIKGPM_00769	CDS	504	lspA	3.4.23.36		Lipoprotein signal peptidase
DLDIKGPM_00770	CDS	942	ispH	1.17.7.4	COG0761	4-hydroxy-3-methylbut-2-enyl diphosphate reductase
DLDIKGPM_00771	CDS	1110	asd	1.2.1.11	COG0136	Aspartate-semialdehyde dehydrogenase
DLDIKGPM_00772	CDS	1071	leuB	1.1.1.85		3-isopropylmalate dehydrogenase
DLDIKGPM_00773	CDS	456	dut	3.6.1.23	COG0756	Deoxyuridine 5'-triphosphate nucleotidohydrolase
DLDIKGPM_00774	CDS	954				hypothetical protein
DLDIKGPM_00775	CDS	1308	glmM	5.4.2.10	COG1109	Phosphoglucosamine mutase
DLDIKGPM_00776	tRNA	76				tRNA-Arg(cct)
DLDIKGPM_00777	CDS	1458	trkG		COG0168	Trk system potassium uptake protein TrkG
DLDIKGPM_00778	CDS	1728	poxB	1.2.5.1	COG0028	Pyruvate dehydrogenase [ubiquinone]
DLDIKGPM_00779	CDS	276				hypothetical protein
DLDIKGPM_00780	CDS	2793	glnE		COG1391	Bifunctional glutamine synthetase adenylyltransferase/adenylyl-removing enzyme
DLDIKGPM_00781	CDS	981	ispB	2.5.1.90	COG0142	Octaprenyl diphosphate synthase
DLDIKGPM_00782	CDS	2037	recG	3.6.4.12	COG1200	ATP-dependent DNA helicase RecG
DLDIKGPM_00783	CDS	399				hypothetical protein
DLDIKGPM_00784	CDS	849	phzF	5.3.3.17		Trans-2,3-dihydro-3-hydroxyanthranilate isomerase
DLDIKGPM_00785	CDS	783	sdhB	1.3.5.1	COG0479	Succinate dehydrogenase iron-sulfur subunit
DLDIKGPM_00786	CDS	1803	sdhA	1.3.5.1		Succinate dehydrogenase flavoprotein subunit
DLDIKGPM_00787	CDS	387				hypothetical protein
DLDIKGPM_00788	CDS	390				hypothetical protein
DLDIKGPM_00789	CDS	807				hypothetical protein
DLDIKGPM_00790	CDS	852	prmC_2	2.1.1.297	COG2890	Release factor glutamine methyltransferase
DLDIKGPM_00791	CDS	375				hypothetical protein
DLDIKGPM_00792	CDS	1227	fabF_1	2.3.1.179		3-oxoacyl-[acyl-carrier-protein] synthase 2
DLDIKGPM_00793	CDS	720	fabG_1	1.1.1.100		3-oxoacyl-[acyl-carrier-protein] reductase FabG
DLDIKGPM_00794	CDS	441				hypothetical protein
DLDIKGPM_00795	CDS	1188	fabF_2	2.3.1.179		3-oxoacyl-[acyl-carrier-protein] synthase 2
DLDIKGPM_00796	CDS	564				hypothetical protein
DLDIKGPM_00797	CDS	2298				hypothetical protein
DLDIKGPM_00798	CDS	597				hypothetical protein
DLDIKGPM_00799	CDS	438		3.1.2.28		1,4-dihydroxy-2-naphthoyl-CoA hydrolase
DLDIKGPM_00800	CDS	969				hypothetical protein
DLDIKGPM_00801	CDS	741				hypothetical protein
DLDIKGPM_00802	CDS	351				hypothetical protein
DLDIKGPM_00803	CDS	1311	dltA	6.2.1.54		D-alanine--D-alanyl carrier protein ligase
DLDIKGPM_00804	CDS	489				hypothetical protein
DLDIKGPM_00805	CDS	246	acpP_1		COG0236	Acyl carrier protein
DLDIKGPM_00806	CDS	261	acpP_2			Acyl carrier protein
DLDIKGPM_00807	CDS	789	aas_2	6.2.1.20		Bifunctional protein Aas
DLDIKGPM_00808	CDS	687				hypothetical protein
DLDIKGPM_00809	CDS	1065	sfmM2	2.1.1.304		L-tyrosine C(3)-methyltransferase
DLDIKGPM_00810	CDS	714				hypothetical protein
DLDIKGPM_00811	CDS	207				hypothetical protein
DLDIKGPM_00812	CDS	978	moaA	4.1.99.22	COG2896	GTP 3',8-cyclase
DLDIKGPM_00813	CDS	873	oxyR			Hydrogen peroxide-inducible genes activator
DLDIKGPM_00814	CDS	2835	sucA	1.2.4.2	COG0567	2-oxoglutarate dehydrogenase E1 component
DLDIKGPM_00815	CDS	1206	sucB	2.3.1.61	COG0508	Dihydrolipoyllysine-residue succinyltransferase component of 2-oxoglutarate dehydrogenase complex
DLDIKGPM_00816	CDS	1428	lpd	1.8.1.4		Dihydrolipoyl dehydrogenase
DLDIKGPM_00817	CDS	1332	mepA_2		COG0534	Multidrug export protein MepA
DLDIKGPM_00818	CDS	414	yqjF		COG2259	Inner membrane protein YqjF
DLDIKGPM_00819	CDS	903	dmlR_3			HTH-type transcriptional regulator DmlR
DLDIKGPM_00820	CDS	1107	ribD		COG0117	Riboflavin biosynthesis protein RibD
DLDIKGPM_00821	CDS	624	ribE	2.5.1.9	COG0307	Riboflavin synthase
DLDIKGPM_00822	CDS	1206	ribBA		COG0108	Riboflavin biosynthesis protein RibBA
DLDIKGPM_00823	CDS	468	ribH	2.5.1.78	COG0054	6,7-dimethyl-8-ribityllumazine synthase
DLDIKGPM_00824	CDS	630				hypothetical protein
DLDIKGPM_00825	CDS	147				hypothetical protein
DLDIKGPM_00826	CDS	564	yceI		COG2353	Protein YceI
DLDIKGPM_00827	CDS	864				hypothetical protein
DLDIKGPM_00828	CDS	900				hypothetical protein
DLDIKGPM_00829	CDS	951	zntB			Zinc transport protein ZntB
DLDIKGPM_00830	CDS	861	corA_1		COG0598	Cobalt/magnesium transport protein CorA
DLDIKGPM_00831	CDS	603				hypothetical protein
DLDIKGPM_00832	CDS	840	yfdC		COG2116	Inner membrane protein YfdC
DLDIKGPM_00833	CDS	1005	yclQ		COG4607	Petrobactin-binding protein YclQ
DLDIKGPM_00834	CDS	759	yclP	7.2.2.-	COG4604	Petrobactin import ATP-binding protein YclP
DLDIKGPM_00835	CDS	948	yclO		COG4605	Petrobactin import system permease protein YclO
DLDIKGPM_00836	CDS	1104	yclN		COG4606	Petrobactin import system permease protein YclN
DLDIKGPM_00837	CDS	855	rhtA		COG5006	Threonine/homoserine exporter RhtA
DLDIKGPM_00838	CDS	348				hypothetical protein
DLDIKGPM_00839	CDS	336	gdnD		COG2076	putative guanidinium efflux system subunit GdnD
DLDIKGPM_00840	CDS	321				hypothetical protein
DLDIKGPM_00841	CDS	1572	abgT_3		COG2978	p-aminobenzoyl-glutamate transport protein
DLDIKGPM_00842	CDS	1167	dnaJ		COG0484	Chaperone protein DnaJ
DLDIKGPM_00843	CDS	1932	dnaK		COG0443	Chaperone protein DnaK
DLDIKGPM_00844	CDS	711			COG0325	Pyridoxal phosphate homeostasis protein
DLDIKGPM_00845	CDS	1380	ntrC		COG2204	DNA-binding transcriptional regulator NtrC
DLDIKGPM_00846	CDS	2484	topA	5.6.2.1		DNA topoisomerase 1
DLDIKGPM_00847	CDS	144				hypothetical protein
DLDIKGPM_00848	CDS	369	dgkA	2.7.1.107	COG0818	Diacylglycerol kinase
DLDIKGPM_00849	CDS	1029	tsaD	2.3.1.234	COG0533	tRNA N6-adenosine threonylcarbamoyltransferase
DLDIKGPM_00850	CDS	1371	dgt	3.1.5.1	COG0232	Deoxyguanosinetriphosphate triphosphohydrolase
DLDIKGPM_00851	CDS	1461	ccoN1	1.9.3.1	COG3278	Cbb3-type cytochrome c oxidase subunit CcoN1
DLDIKGPM_00852	CDS	807				hypothetical protein
DLDIKGPM_00853	CDS	267				hypothetical protein
DLDIKGPM_00854	CDS	942	fixP		COG2010	Cbb3-type cytochrome c oxidase subunit FixP
DLDIKGPM_00855	CDS	1410				hypothetical protein
DLDIKGPM_00856	CDS	822				hypothetical protein
DLDIKGPM_00857	CDS	2349	copA_1	7.2.2.8		putative copper-importing P-type ATPase A
DLDIKGPM_00858	CDS	207				hypothetical protein
DLDIKGPM_00859	CDS	291	gatC	6.3.5.-	COG0721	Glutamyl-tRNA(Gln) amidotransferase subunit C
DLDIKGPM_00860	CDS	1446	gatA	6.3.5.7	COG0154	Glutamyl-tRNA(Gln) amidotransferase subunit A
DLDIKGPM_00861	CDS	1428	gatB	6.3.5.-	COG0064	Aspartyl/glutamyl-tRNA(Asn/Gln) amidotransferase subunit B
DLDIKGPM_00862	CDS	549				hypothetical protein
DLDIKGPM_00863	CDS	2220	icd2	1.1.1.42		Isocitrate dehydrogenase [NADP] 2
DLDIKGPM_00864	CDS	1260	gltS_1		COG0786	Sodium/glutamate symporter
DLDIKGPM_00865	CDS	663	queC	6.3.4.20	COG0603	7-cyano-7-deazaguanine synthase
DLDIKGPM_00866	CDS	426	queD	4.1.2.50	COG0720	6-carboxy-5,6,7,8-tetrahydropterin synthase
DLDIKGPM_00867	CDS	708	queE	4.3.99.3	COG0602	7-carboxy-7-deazaguanine synthase
DLDIKGPM_00868	CDS	1413	glnA	6.3.1.2	COG0174	Glutamine synthetase
DLDIKGPM_00869	CDS	339				hypothetical protein
DLDIKGPM_00870	CDS	684	ygaZ		COG1296	Inner membrane protein YgaZ
DLDIKGPM_00871	CDS	1470	gadC_2		COG0531	Glutamate/gamma-aminobutyrate antiporter
DLDIKGPM_00872	CDS	924	glsA1	3.5.1.2	COG2066	Glutaminase 1
DLDIKGPM_00873	CDS	819	murI	5.1.1.3		Glutamate racemase
DLDIKGPM_00874	CDS	936	lysO		COG2431	Lysine exporter LysO
DLDIKGPM_00875	CDS	1356	proP_2			Proline/betaine transporter
DLDIKGPM_00876	CDS	285	trpR			Trp operon repressor
DLDIKGPM_00877	CDS	969				hypothetical protein
DLDIKGPM_00878	CDS	846				hypothetical protein
DLDIKGPM_00879	CDS	768	btuD	7.6.2.8		Vitamin B12 import ATP-binding protein BtuD
DLDIKGPM_00880	CDS	939				hypothetical protein
DLDIKGPM_00881	CDS	792	panB	2.1.2.11	COG0413	3-methyl-2-oxobutanoate hydroxymethyltransferase
DLDIKGPM_00882	CDS	828	panC	6.3.2.1		Pantothenate synthetase
DLDIKGPM_00883	CDS	432	mopA		COG2005	Molybdenum-pterin-binding protein MopA
DLDIKGPM_00884	CDS	699	nlpD			Murein hydrolase activator NlpD
DLDIKGPM_00885	CDS	2322	maeB	1.1.1.40	COG0280	NADP-dependent malic enzyme
DLDIKGPM_00886	CDS	867	rpoH		COG0568	RNA polymerase sigma factor RpoH
DLDIKGPM_00887	CDS	603				hypothetical protein
DLDIKGPM_00888	CDS	1338	garB	1.8.1.16		Glutathione amide reductase
DLDIKGPM_00889	CDS	1467	pitA_2		COG0306	Low-affinity inorganic phosphate transporter 1
DLDIKGPM_00890	CDS	561	tsaC	2.7.7.87	COG0009	Threonylcarbamoyl-AMP synthase
DLDIKGPM_00891	CDS	516				hypothetical protein
DLDIKGPM_00892	CDS	2028	cirA_1		COG4771	Colicin I receptor
DLDIKGPM_00893	CDS	1083	adh	1.1.1.1	COG1063	Alcohol dehydrogenase
DLDIKGPM_00894	CDS	2607	alaS	6.1.1.7	COG0013	Alanine--tRNA ligase
DLDIKGPM_00895	CDS	666	leuD	4.2.1.33	COG0066	3-isopropylmalate dehydratase small subunit
DLDIKGPM_00896	CDS	1401	leuC	4.2.1.33	COG0065	3-isopropylmalate dehydratase large subunit
DLDIKGPM_00897	CDS	1119	proB	2.7.2.11		Glutamate 5-kinase
DLDIKGPM_00898	CDS	2751	secA		COG0653	Protein translocase subunit SecA
DLDIKGPM_00899	CDS	267	rpsT		COG0268	30S ribosomal protein S20
DLDIKGPM_00900	CDS	774	metQ_1		COG1464	D-methionine-binding lipoprotein MetQ
DLDIKGPM_00901	CDS	738				hypothetical protein
DLDIKGPM_00902	CDS	1029	metN	3.6.3.-	COG1135	Methionine import ATP-binding protein MetN
DLDIKGPM_00903	CDS	168	rpmG		COG0267	50S ribosomal protein L33
DLDIKGPM_00904	CDS	237	rpmB		COG0227	50S ribosomal protein L28
DLDIKGPM_00905	CDS	1038	pilT_2		COG2805	Twitching mobility protein
DLDIKGPM_00906	CDS	672	rpe	5.1.3.1	COG0036	Ribulose-phosphate 3-epimerase
DLDIKGPM_00907	CDS	1284	hemL	5.4.3.8	COG0001	Glutamate-1-semialdehyde 2,1-aminomutase
DLDIKGPM_00908	CDS	315	rsfS			Ribosomal silencing factor RsfS
DLDIKGPM_00909	CDS	471	rlmH	2.1.1.177	COG1576	Ribosomal RNA large subunit methyltransferase H
DLDIKGPM_00910	CDS	1221	fabB	2.3.1.41		3-oxoacyl-[acyl-carrier-protein] synthase 1
DLDIKGPM_00911	CDS	516	fabA	4.2.1.59	COG0764	3-hydroxydecanoyl-[acyl-carrier-protein] dehydratase
DLDIKGPM_00912	CDS	1020	rfaC	2.-.-.-	COG0859	Lipopolysaccharide heptosyltransferase 1
DLDIKGPM_00913	CDS	903	lpxP	2.3.1.242	COG1560	Lipid A biosynthesis palmitoleoyltransferase
DLDIKGPM_00914	CDS	477	gpt	2.4.2.22	COG0503	Xanthine phosphoribosyltransferase
DLDIKGPM_00915	CDS	1317	rimO	2.8.4.4	COG0621	Ribosomal protein S12 methylthiotransferase RimO
DLDIKGPM_00916	CDS	2088				hypothetical protein
DLDIKGPM_00917	CDS	510	lptE			LPS-assembly lipoprotein LptE
DLDIKGPM_00918	CDS	438	dtd	3.1.1.96	COG1490	D-aminoacyl-tRNA deacylase
DLDIKGPM_00919	CDS	1008	ruvB	3.6.4.12	COG2255	Holliday junction ATP-dependent DNA helicase RuvB
DLDIKGPM_00920	CDS	957	nagZ	3.2.1.52	COG1472	Beta-hexosaminidase
DLDIKGPM_00921	CDS	774				hypothetical protein
DLDIKGPM_00922	CDS	852	nfo	3.1.21.2	COG0648	Endonuclease 4
DLDIKGPM_00923	CDS	750	rsmJ	2.1.1.242		Ribosomal RNA small subunit methyltransferase J
DLDIKGPM_00924	CDS	675		3.1.3.-	COG0637	Phosphorylated carbohydrates phosphatase
DLDIKGPM_00925	CDS	561				hypothetical protein
DLDIKGPM_00926	CDS	969	gshB_1	6.3.2.3	COG0189	Glutathione synthetase
DLDIKGPM_00927	CDS	738	rsmE	2.1.1.193	COG1385	Ribosomal RNA small subunit methyltransferase E
DLDIKGPM_00928	CDS	918	lpxL	2.3.1.241	COG1560	Lipid A biosynthesis lauroyltransferase
DLDIKGPM_00929	CDS	753	mlaA		COG2853	Intermembrane phospholipid transport system lipoprotein MlaA
DLDIKGPM_00930	CDS	774	yadH		COG0842	Inner membrane transport permease YadH
DLDIKGPM_00931	CDS	951	yadG		COG1131	putative ABC transporter ATP-binding protein YadG
DLDIKGPM_00932	CDS	1041				hypothetical protein
DLDIKGPM_00933	CDS	1392	sasA_2	2.7.-.-		Adaptive-response sensory-kinase SasA
DLDIKGPM_00934	CDS	681	cpxR_2		COG0745	Transcriptional regulatory protein CpxR
DLDIKGPM_00935	CDS	1458	rpoN		COG1508	RNA polymerase sigma-54 factor
DLDIKGPM_00936	CDS	621	plsY	2.3.1.15	COG0344	putative glycerol-3-phosphate acyltransferase
DLDIKGPM_00937	CDS	1941	yoaA	3.6.4.12	COG1199	putative ATP-dependent DNA helicase YoaA
DLDIKGPM_00938	CDS	762	mazG	3.6.1.8	COG1694	Nucleoside triphosphate pyrophosphohydrolase
DLDIKGPM_00939	CDS	1269	xseA	3.1.11.6	COG1570	Exodeoxyribonuclease 7 large subunit
DLDIKGPM_00940	CDS	381	ygiW		COG3111	Protein YgiW
DLDIKGPM_00941	CDS	1209	ynfM			Inner membrane transport protein YnfM
DLDIKGPM_00942	CDS	435	yqjC			Protein YqjC
DLDIKGPM_00943	CDS	2178	uvrD	3.6.4.12	COG0210	DNA helicase II
DLDIKGPM_00944	CDS	441	ndk	2.7.4.6		Nucleoside diphosphate kinase
DLDIKGPM_00945	CDS	1116	rlmN	2.1.1.192	COG0820	Dual-specificity RNA methyltransferase RlmN
DLDIKGPM_00946	CDS	732	bepA_1	3.4.-.-		Beta-barrel assembly-enhancing protease
DLDIKGPM_00947	CDS	1005	rodZ		COG1426	Cytoskeleton protein RodZ
DLDIKGPM_00948	CDS	1278	hisS	6.1.1.21	COG0124	Histidine--tRNA ligase
DLDIKGPM_00949	CDS	618				hypothetical protein
DLDIKGPM_00950	CDS	1149	bamB		COG1520	Outer membrane protein assembly factor BamB
DLDIKGPM_00951	CDS	1455	der_2		COG1160	GTPase Der
DLDIKGPM_00952	CDS	1791	glmS_1	2.6.1.16	COG0449	Glutamine--fructose-6-phosphate aminotransferase [isomerizing]
DLDIKGPM_00953	tRNA	76				tRNA-Gly(gcc)
DLDIKGPM_00954	CDS	3840				hypothetical protein
DLDIKGPM_00955	CDS	450				hypothetical protein
DLDIKGPM_00956	CDS	186				hypothetical protein
	repeat_region	8371
DLDIKGPM_00957	CDS	603	cas6f_1	3.1.-.-		CRISPR-associated endonuclease Cas6/Csy4
DLDIKGPM_00958	CDS	1065	csy3			CRISPR-associated protein Csy3
DLDIKGPM_00959	CDS	945	csy2			CRISPR-associated protein Csy2
DLDIKGPM_00960	CDS	1251				hypothetical protein
DLDIKGPM_00961	CDS	3399	cas3	3.1.-.-		CRISPR-associated nuclease/helicase Cas3 subtype I-F/YPEST
DLDIKGPM_00962	CDS	954	cas1	3.1.-.-		CRISPR-associated endonuclease Cas1
DLDIKGPM_00963	CDS	807	yidA	3.1.3.23	COG0561	Sugar phosphatase YidA
DLDIKGPM_00964	CDS	816	metQ_2		COG1464	Methionine-binding lipoprotein MetQ
DLDIKGPM_00965	CDS	816	metQ_3		COG1464	Methionine-binding lipoprotein MetQ
DLDIKGPM_00966	CDS	1179	ydbM	1.3.99.-		Putative acyl-CoA dehydrogenase YdbM
DLDIKGPM_00967	CDS	690				hypothetical protein
DLDIKGPM_00968	CDS	1026	metN2	3.6.3.-	COG1135	Methionine import ATP-binding protein MetN 2
DLDIKGPM_00969	CDS	414	yqgF	3.1.-.-	COG0816	Putative pre-16S rRNA nuclease
DLDIKGPM_00970	CDS	3909	purL	6.3.5.3	COG0046	Phosphoribosylformylglycinamidine synthase
DLDIKGPM_00971	CDS	1563				hypothetical protein
DLDIKGPM_00972	CDS	1680	bepA_2	3.4.-.-		Beta-barrel assembly-enhancing protease
DLDIKGPM_00973	CDS	681	elbB	4.2.1.-	COG3155	Glyoxalase ElbB
DLDIKGPM_00974	CDS	1302	hom	1.1.1.3	COG0460	Homoserine dehydrogenase
DLDIKGPM_00975	CDS	1743	ilvI	2.2.1.6	COG0028	Acetolactate synthase isozyme 3 large subunit
DLDIKGPM_00976	CDS	522	ilvH	2.2.1.6	COG0440	Acetolactate synthase isozyme 3 small subunit
DLDIKGPM_00977	CDS	1017	ilvC	1.1.1.86	COG0059	Ketol-acid reductoisomerase (NADP(+))
DLDIKGPM_00978	CDS	1377	aroH	2.5.1.54	COG3200	Phospho-2-dehydro-3-deoxyheptonate aldolase
DLDIKGPM_00979	CDS	957	accA	2.1.3.15	COG0825	Acetyl-coenzyme A carboxylase carboxyl transferase subunit alpha
DLDIKGPM_00980	CDS	891				hypothetical protein
DLDIKGPM_00981	CDS	1020	glmS_2	2.6.1.16	COG0449	Glutamine--fructose-6-phosphate aminotransferase [isomerizing]
DLDIKGPM_00982	CDS	1104	agaAII	3.5.1.-	COG1820	N-acetylgalactosamine-6-phosphate deacetylase
DLDIKGPM_00983	CDS	906				hypothetical protein
DLDIKGPM_00984	CDS	1122				hypothetical protein
DLDIKGPM_00985	CDS	963	psaA		COG0803	Manganese ABC transporter substrate-binding lipoprotein
DLDIKGPM_00986	CDS	498	ogt	2.1.1.63	COG0350	Methylated-DNA--protein-cysteine methyltransferase, constitutive
DLDIKGPM_00987	CDS	1638	glcA		COG1620	Glycolate permease GlcA
DLDIKGPM_00988	CDS	2823				hypothetical protein
DLDIKGPM_00989	CDS	1131	lldD	1.1.-.-	COG1304	L-lactate dehydrogenase
DLDIKGPM_00990	CDS	1386	dbpA	3.6.4.13	COG0513	ATP-dependent RNA helicase DbpA
DLDIKGPM_00991	CDS	543	dsbC		COG1651	Thiol:disulfide interchange protein DsbC
DLDIKGPM_00992	CDS	1731	fruA		COG1299	PTS system fructose-specific EIIB'BC component
DLDIKGPM_00993	CDS	939	lacC	2.7.1.144		Tagatose-6-phosphate kinase
DLDIKGPM_00994	CDS	2520				hypothetical protein
DLDIKGPM_00995	CDS	2262	yhgF		COG2183	Protein YhgF
DLDIKGPM_00996	CDS	1215				hypothetical protein
DLDIKGPM_00997	CDS	693	ddpX_1	3.4.13.22		D-alanyl-D-alanine dipeptidase
DLDIKGPM_00998	CDS	429				hypothetical protein
DLDIKGPM_00999	CDS	1416	norG_1		COG1167	HTH-type transcriptional regulator NorG
DLDIKGPM_01000	CDS	636	tesA_1	3.1.2.2	COG2755	Thioesterase 1/protease 1/lysophospholipase L1
DLDIKGPM_01001	CDS	777	modE		COG2005	DNA-binding transcriptional dual regulator ModE
DLDIKGPM_01002	CDS	498				hypothetical protein
DLDIKGPM_01003	CDS	1185				hypothetical protein
DLDIKGPM_01004	CDS	276				hypothetical protein
DLDIKGPM_01005	CDS	1587	rhlB_1	3.6.4.13		ATP-dependent RNA helicase RhlB
DLDIKGPM_01006	CDS	324				Thioredoxin C-2
DLDIKGPM_01007	CDS	507	tpx	1.11.1.15	COG2077	Thiol peroxidase
DLDIKGPM_01008	CDS	558				hypothetical protein
DLDIKGPM_01009	CDS	1044	prfB		COG1186	Peptide chain release factor RF2
DLDIKGPM_01010	CDS	195				hypothetical protein
DLDIKGPM_01011	CDS	198				hypothetical protein
DLDIKGPM_01012	CDS	858	rnd	3.1.13.5	COG0349	Ribonuclease D
DLDIKGPM_01013	CDS	330	bamE		COG2913	Outer membrane protein assembly factor BamE
DLDIKGPM_01014	CDS	396	mgsA	4.2.3.3	COG1803	Methylglyoxal synthase
DLDIKGPM_01015	CDS	819	kdsA	2.5.1.55	COG2877	2-dehydro-3-deoxyphosphooctonate aldolase
DLDIKGPM_01016	CDS	570	yhdE	3.6.1.9	COG0424	dTTP/UTP pyrophosphatase
DLDIKGPM_01017	CDS	858				hypothetical protein
DLDIKGPM_01018	CDS	711				hypothetical protein
DLDIKGPM_01019	CDS	882	xerD_2		COG4974	Tyrosine recombinase XerD
DLDIKGPM_01020	CDS	660	artM		COG4160	Arginine ABC transporter permease protein ArtM
DLDIKGPM_01021	CDS	687	artQ		COG4215	Arginine ABC transporter permease protein ArtQ
DLDIKGPM_01022	CDS	738	artJ		COG0834	ABC transporter arginine-binding protein 1
DLDIKGPM_01023	CDS	726	artP	3.6.3.-	COG4161	Arginine transport ATP-binding protein ArtP
DLDIKGPM_01024	CDS	840				hypothetical protein
DLDIKGPM_01025	CDS	414				hypothetical protein
DLDIKGPM_01026	CDS	1038	corA_2		COG0598	Magnesium transport protein CorA
DLDIKGPM_01027	CDS	240				hypothetical protein
DLDIKGPM_01028	CDS	2361	feoB		COG0370	Fe(2+) transporter FeoB
DLDIKGPM_01029	CDS	261				hypothetical protein
DLDIKGPM_01030	CDS	441				hypothetical protein
DLDIKGPM_01031	CDS	816	apaH	3.6.1.41	COG0639	Bis(5'-nucleosyl)-tetraphosphatase, symmetrical
DLDIKGPM_01032	CDS	1092				hypothetical protein
DLDIKGPM_01033	CDS	534				hypothetical protein
DLDIKGPM_01034	CDS	624	rhtC		COG1280	Threonine efflux protein
DLDIKGPM_01035	CDS	1062	cobT	2.4.2.21		Nicotinate-nucleotide--dimethylbenzimidazole phosphoribosyltransferase
DLDIKGPM_01036	CDS	546		1.6.5.7		2-hydroxy-1,4-benzoquinone reductase
DLDIKGPM_01037	CDS	1278		2.5.1.-	COG2873	O-acetyl-L-homoserine sulfhydrylase
DLDIKGPM_01038	CDS	1131	hemW		COG0635	Heme chaperone HemW
DLDIKGPM_01039	CDS	759	nadE_1	6.3.1.5	COG0171	NH(3)-dependent NAD(+) synthetase
DLDIKGPM_01040	CDS	1098				hypothetical protein
DLDIKGPM_01041	CDS	411	yqaA		COG1238	Inner membrane protein YqaA
DLDIKGPM_01042	CDS	432	mscL		COG1970	Large-conductance mechanosensitive channel
DLDIKGPM_01043	CDS	3249	smc_2			Chromosome partition protein Smc
DLDIKGPM_01044	CDS	1326	sbcD		COG0420	Nuclease SbcCD subunit D
DLDIKGPM_01045	CDS	243				hypothetical protein
DLDIKGPM_01046	CDS	2493	der_3			GTPase Der
DLDIKGPM_01047	CDS	306				hypothetical protein
DLDIKGPM_01048	CDS	795				hypothetical protein
DLDIKGPM_01049	CDS	249				hypothetical protein
DLDIKGPM_01050	CDS	1017	dctP		COG1638	C4-dicarboxylate-binding periplasmic protein DctP
DLDIKGPM_01051	CDS	666	dctQ		COG3090	C4-dicarboxylate TRAP transporter small permease protein DctQ
DLDIKGPM_01052	CDS	1284	dctM		COG1593	C4-dicarboxylate TRAP transporter large permease protein DctM
DLDIKGPM_01053	CDS	600	tehB	2.1.1.-		putative S-adenosyl-L-methionine-dependent methyltransferase TehB
DLDIKGPM_01054	CDS	1017	ccp	1.11.1.5	COG1858	Cytochrome c551 peroxidase
DLDIKGPM_01055	CDS	1272	serS	6.1.1.11	COG0172	Serine--tRNA ligase
DLDIKGPM_01056	CDS	252	fdx		COG1145	Ferredoxin
DLDIKGPM_01057	CDS	993	erfK	2.-.-.-	COG1376	putative L,D-transpeptidase ErfK/SrfK
DLDIKGPM_01058	CDS	1200	tyrS	6.1.1.1	COG0162	Tyrosine--tRNA ligase
DLDIKGPM_01059	CDS	324	fdxA		COG1146	Ferredoxin 1
DLDIKGPM_01060	CDS	966	rsgA	3.6.1.-	COG1162	Small ribosomal subunit biogenesis GTPase RsgA
DLDIKGPM_01061	CDS	1143	potA	7.6.2.11	COG3842	Spermidine/putrescine import ATP-binding protein PotA
DLDIKGPM_01062	CDS	1020	potH		COG1176	Putrescine transport system permease protein PotH
DLDIKGPM_01063	CDS	807	ydcV			Inner membrane ABC transporter permease protein YdcV
DLDIKGPM_01064	CDS	1014				hypothetical protein
DLDIKGPM_01065	CDS	318				hypothetical protein
DLDIKGPM_01066	CDS	555				hypothetical protein
DLDIKGPM_01067	CDS	1080				hypothetical protein
DLDIKGPM_01068	CDS	321				hypothetical protein
DLDIKGPM_01069	CDS	273		2.8.1.-	COG0607	Sulfurtransferase
DLDIKGPM_01070	CDS	438				hypothetical protein
DLDIKGPM_01071	CDS	633	rsxB	7.-.-.-		Ion-translocating oxidoreductase complex subunit B
DLDIKGPM_01072	CDS	657	nth	4.2.99.18	COG0177	Endonuclease III
DLDIKGPM_01073	CDS	657	lipB	2.3.1.181	COG0321	Octanoyltransferase
DLDIKGPM_01074	CDS	960	lipA	2.8.1.8	COG0320	Lipoyl synthase
DLDIKGPM_01075	CDS	1020	fieF			Ferrous-iron efflux pump FieF
DLDIKGPM_01076	CDS	774	yjjV	3.1.-.-	COG0084	putative metal-dependent hydrolase YjjV
DLDIKGPM_01077	CDS	1056	pnoA	1.13.12.-		Nitronate monooxygenase
DLDIKGPM_01078	CDS	732				hypothetical protein
DLDIKGPM_01079	CDS	702	yccA		COG0670	Modulator of FtsH protease YccA
DLDIKGPM_01080	CDS	1617	nadE_2	6.3.5.1	COG0171	Glutamine-dependent NAD(+) synthetase
DLDIKGPM_01081	CDS	1665	recN		COG0497	DNA repair protein RecN
DLDIKGPM_01082	CDS	669				hypothetical protein
	repeat_region	2968
DLDIKGPM_01083	CDS	384				hypothetical protein
DLDIKGPM_01084	CDS	1530	guaA_2	6.3.5.2		GMP synthase [glutamine-hydrolyzing]
DLDIKGPM_01085	CDS	1152	metC	4.4.1.13	COG0626	Cystathionine beta-lyase MetC
DLDIKGPM_01086	CDS	1221	tyrP		COG0814	Tyrosine-specific transport protein
DLDIKGPM_01087	CDS	1257	dadA1_1	1.4.99.-	COG0665	D-amino acid dehydrogenase 1
DLDIKGPM_01088	CDS	1362				hypothetical protein
DLDIKGPM_01089	CDS	900				hypothetical protein
DLDIKGPM_01090	CDS	804	trpA	4.2.1.20		Tryptophan synthase alpha chain
DLDIKGPM_01091	CDS	1188	trpB	4.2.1.20	COG0133	Tryptophan synthase beta chain
DLDIKGPM_01092	CDS	1374	trpC_1		COG0134	Tryptophan biosynthesis protein TrpCF
DLDIKGPM_01093	CDS	1008	trpGD		COG0512	Bifunctional protein TrpGD
DLDIKGPM_01094	CDS	1221	alaA	2.6.1.2	COG0436	Glutamate-pyruvate aminotransferase AlaA
DLDIKGPM_01095	CDS	1455	mleN_2		COG1757	Malate-2H(+)/Na(+)-lactate antiporter
DLDIKGPM_01096	CDS	855				hypothetical protein
DLDIKGPM_01097	CDS	936				hypothetical protein
DLDIKGPM_01098	CDS	459				hypothetical protein
DLDIKGPM_01099	CDS	552				hypothetical protein
DLDIKGPM_01100	CDS	498	mraZ			Transcriptional regulator MraZ
DLDIKGPM_01101	CDS	849	yrpC	5.1.1.3	COG0796	Glutamate racemase 2
DLDIKGPM_01102	CDS	2535	pepN	3.4.11.2	COG0308	Aminopeptidase N
DLDIKGPM_01103	CDS	546	fbiB	6.3.2.34		Bifunctional F420 biosynthesis protein FbiB
DLDIKGPM_01104	CDS	774	yfcA		COG0730	putative membrane transporter protein YfcA
DLDIKGPM_01105	CDS	495				hypothetical protein
DLDIKGPM_01106	CDS	1419	plaP		COG0531	Low-affinity putrescine importer PlaP
DLDIKGPM_01107	CDS	552	lolB		COG3017	Outer-membrane lipoprotein LolB
DLDIKGPM_01108	CDS	825	ispE	2.7.1.148	COG1947	4-diphosphocytidyl-2-C-methyl-D-erythritol kinase
DLDIKGPM_01109	CDS	1515	fumB	4.2.1.2	COG1838	Fumarate hydratase class I, anaerobic
DLDIKGPM_01110	CDS	1662				hypothetical protein
DLDIKGPM_01111	CDS	777	mlaE		COG0767	Intermembrane phospholipid transport system permease protein MlaE
DLDIKGPM_01112	CDS	792	mlaF	3.6.3.-	COG1127	Intermembrane phospholipid transport system ATP-binding protein MlaF
DLDIKGPM_01113	CDS	1779				hypothetical protein
DLDIKGPM_01114	CDS	1506				hypothetical protein
DLDIKGPM_01115	CDS	372	walR		COG0745	Transcriptional regulatory protein WalR
DLDIKGPM_01116	CDS	516				hypothetical protein
DLDIKGPM_01117	tRNA	76				tRNA-Glu(ttc)
DLDIKGPM_01118	tRNA	76				tRNA-Ala(ggc)
DLDIKGPM_01119	tRNA	76				tRNA-Glu(ttc)
DLDIKGPM_01120	CDS	324	hvrA			Trans-acting regulatory protein HvrA
DLDIKGPM_01121	CDS	678				hypothetical protein
DLDIKGPM_01122	CDS	558	cobO	2.5.1.-	COG2096	Cobalamin adenosyltransferase
DLDIKGPM_01123	CDS	882	ubiA	2.5.1.39	COG0382	4-hydroxybenzoate octaprenyltransferase
DLDIKGPM_01124	CDS	327				hypothetical protein
DLDIKGPM_01125	CDS	933				hypothetical protein
DLDIKGPM_01126	CDS	210				hypothetical protein
DLDIKGPM_01127	CDS	930	rluC	5.4.99.24	COG0564	Ribosomal large subunit pseudouridine synthase C
DLDIKGPM_01128	CDS	1053	recA			Protein RecA
DLDIKGPM_01129	CDS	1413	hldE		COG2870	Bifunctional protein HldE
DLDIKGPM_01130	CDS	783	ycfH	3.1.-.-	COG0084	putative metal-dependent hydrolase YcfH
DLDIKGPM_01131	CDS	339				hypothetical protein
DLDIKGPM_01132	CDS	4887	cheB	3.5.1.44		Protein-glutamate methylesterase/protein-glutamine glutaminase
DLDIKGPM_01133	CDS	1461				hypothetical protein
DLDIKGPM_01134	CDS	459	cheW		COG0835	Chemotaxis protein CheW
DLDIKGPM_01135	CDS	372	patA_3		COG0784	Protein PatA
DLDIKGPM_01136	CDS	804	mntB_4		COG1121	Manganese transport system ATP-binding protein MntB
DLDIKGPM_01137	CDS	867	mntB_5			Manganese transport system membrane protein MntB
DLDIKGPM_01138	CDS	249	moaD		COG1977	Molybdopterin synthase sulfur carrier subunit
DLDIKGPM_01139	CDS	459	moaE	2.8.1.12	COG0314	Molybdopterin synthase catalytic subunit
DLDIKGPM_01140	CDS	600	mobA	2.7.7.77	COG0746	Molybdenum cofactor guanylyltransferase
DLDIKGPM_01141	CDS	1182	moeA	2.10.1.1	COG0303	Molybdopterin molybdenumtransferase
DLDIKGPM_01142	CDS	630	rsmG	2.1.1.170	COG0357	Ribosomal RNA small subunit methyltransferase G
DLDIKGPM_01143	CDS	774	parA			Chromosome partitioning protein ParA
DLDIKGPM_01144	CDS	900	parB		COG1475	putative chromosome-partitioning protein ParB
DLDIKGPM_01145	CDS	348				hypothetical protein
DLDIKGPM_01146	CDS	816	atpB		COG0356	ATP synthase subunit a
DLDIKGPM_01147	CDS	234	atpH_1			ATP synthase subunit c
DLDIKGPM_01148	CDS	471	atpF		COG0711	ATP synthase subunit b
DLDIKGPM_01149	CDS	555	atpH_2		COG0712	ATP synthase subunit delta
DLDIKGPM_01150	CDS	1548	atpA	7.1.2.2		ATP synthase subunit alpha
DLDIKGPM_01151	CDS	912	atpG		COG0224	ATP synthase gamma chain
DLDIKGPM_01152	CDS	1374	atpD	7.1.2.2	COG0055	ATP synthase subunit beta
DLDIKGPM_01153	CDS	423	atpC		COG0355	ATP synthase epsilon chain
DLDIKGPM_01154	CDS	1215	sstT		COG3633	Serine/threonine transporter SstT
DLDIKGPM_01155	CDS	723				hypothetical protein
DLDIKGPM_01156	CDS	729				hypothetical protein
DLDIKGPM_01157	tRNA	89				tRNA-Leu(taa)
DLDIKGPM_01158	CDS	1395				hypothetical protein
DLDIKGPM_01159	CDS	2166	apxIB_1		COG2274	Toxin RTX-I translocation ATP-binding protein
DLDIKGPM_01160	CDS	1224	prsE			Type I secretion system membrane fusion protein PrsE
DLDIKGPM_01161	CDS	561				hypothetical protein
DLDIKGPM_01162	CDS	693	phoB		COG0745	Phosphate regulon transcriptional regulatory protein PhoB
DLDIKGPM_01163	CDS	1287	phoR	2.7.13.3		Phosphate regulon sensor protein PhoR
DLDIKGPM_01164	CDS	1032	pstS		COG0226	Phosphate-binding protein PstS
DLDIKGPM_01165	CDS	960	pstC		COG0573	Phosphate transport system permease protein PstC
DLDIKGPM_01166	CDS	861	pstA		COG0581	Phosphate transport system permease protein PstA
DLDIKGPM_01167	CDS	771	pstB	7.3.2.1	COG1117	Phosphate import ATP-binding protein PstB
DLDIKGPM_01168	CDS	720	phoU		COG0704	Phosphate-specific transport system accessory protein PhoU
DLDIKGPM_01169	CDS	129				hypothetical protein
DLDIKGPM_01170	CDS	645				hypothetical protein
DLDIKGPM_01171	CDS	768	yhhW	1.13.11.24	COG1741	Quercetin 2,3-dioxygenase
DLDIKGPM_01172	CDS	834	bioP		COG0697	Biotin transporter
DLDIKGPM_01173	CDS	1563	murJ		COG0728	putative lipid II flippase MurJ
DLDIKGPM_01174	CDS	477	luxS	4.4.1.21	COG1854	S-ribosylhomocysteine lyase
DLDIKGPM_01175	CDS	1494	comM		COG0606	Competence protein ComM
DLDIKGPM_01176	CDS	852	pdxS	4.3.3.6		Pyridoxal 5'-phosphate synthase subunit PdxS
DLDIKGPM_01177	CDS	1392	norG_2		COG1167	HTH-type transcriptional regulator NorG
DLDIKGPM_01178	CDS	705			COG0500	putative protein
DLDIKGPM_01179	CDS	642	tenA	3.5.99.2	COG0819	Aminopyrimidine aminohydrolase
DLDIKGPM_01180	CDS	681	bioD1	6.3.3.3	COG0132	ATP-dependent dethiobiotin synthetase BioD 1
DLDIKGPM_01181	CDS	1356	bioA	2.6.1.62		Adenosylmethionine-8-amino-7-oxononanoate aminotransferase
DLDIKGPM_01182	CDS	504	slyB_2		COG3133	Outer membrane lipoprotein SlyB
DLDIKGPM_01183	CDS	576				hypothetical protein
DLDIKGPM_01184	CDS	252	yedF		COG0425	Putative sulfur carrier protein YedF
DLDIKGPM_01185	CDS	1233				hypothetical protein
DLDIKGPM_01186	CDS	1389	alsT_2		COG1115	Amino-acid carrier protein AlsT
DLDIKGPM_01187	CDS	231	yccJ			putative protein YccJ
DLDIKGPM_01188	CDS	2100	metG	6.1.1.10	COG0073	Methionine--tRNA ligase
DLDIKGPM_01189	CDS	480	ispF	4.6.1.12	COG0245	2-C-methyl-D-erythritol 2,4-cyclodiphosphate synthase
DLDIKGPM_01190	CDS	699	ispD	2.7.7.60		2-C-methyl-D-erythritol 4-phosphate cytidylyltransferase
DLDIKGPM_01191	CDS	438	uspA2		COG0589	Universal stress protein A
DLDIKGPM_01192	CDS	444				hypothetical protein
DLDIKGPM_01193	CDS	1194	acrA			Multidrug efflux pump subunit AcrA
DLDIKGPM_01194	CDS	3189	acrB		COG0841	Multidrug efflux pump subunit AcrB
DLDIKGPM_01195	CDS	852				hypothetical protein
DLDIKGPM_01196	CDS	396				hypothetical protein
DLDIKGPM_01197	CDS	276				hypothetical protein
DLDIKGPM_01198	CDS	1377	cysS	6.1.1.16	COG0215	Cysteine--tRNA ligase
DLDIKGPM_01199	CDS	1614				hypothetical protein
DLDIKGPM_01200	CDS	576	ahpC	1.11.1.15	COG0450	Alkyl hydroperoxide reductase C
DLDIKGPM_01201	CDS	927	xerC		COG4973	Tyrosine recombinase XerC
DLDIKGPM_01202	CDS	369	hslR		COG1188	Heat shock protein 15
DLDIKGPM_01203	CDS	339	minE			Cell division topological specificity factor
DLDIKGPM_01204	CDS	810	minD		COG2894	Septum site-determining protein MinD
DLDIKGPM_01205	CDS	741	minC		COG0850	Septum site-determining protein MinC
DLDIKGPM_01206	CDS	486	slyD	5.2.1.8	COG1047	FKBP-type peptidyl-prolyl cis-trans isomerase SlyD
DLDIKGPM_01207	CDS	660	rpiA	5.3.1.6		Ribose-5-phosphate isomerase A
DLDIKGPM_01208	CDS	588	lptC			Lipopolysaccharide export system protein LptC
DLDIKGPM_01209	CDS	501	lptA		COG1934	Lipopolysaccharide export system protein LptA
DLDIKGPM_01210	CDS	723	lptB	3.6.3.-	COG1137	Lipopolysaccharide export system ATP-binding protein LptB
DLDIKGPM_01211	CDS	1413	sbcB	3.1.11.1	COG2925	Exodeoxyribonuclease I
DLDIKGPM_01212	CDS	843				hypothetical protein
DLDIKGPM_01213	CDS	975				hypothetical protein
DLDIKGPM_01214	CDS	690	pyrE_1	2.4.2.10		Orotate phosphoribosyltransferase
DLDIKGPM_01215	CDS	633		6.3.3.2	COG0212	5-formyltetrahydrofolate cyclo-ligase
DLDIKGPM_01216	CDS	519	ompA			Outer membrane protein A
DLDIKGPM_01217	CDS	1761	msbA	7.5.2.6	COG1132	Lipid A export ATP-binding/permease protein MsbA
DLDIKGPM_01218	CDS	522	pal		COG2885	Peptidoglycan-associated lipoprotein
DLDIKGPM_01219	CDS	1257	tolB		COG0823	Tol-Pal system protein TolB
DLDIKGPM_01220	CDS	555	hpt	2.4.2.8		Hypoxanthine-guanine phosphoribosyltransferase
DLDIKGPM_01221	CDS	1278	hemA	1.2.1.70	COG0373	Glutamyl-tRNA reductase
DLDIKGPM_01222	CDS	1092	mshA	2.4.1.250		D-inositol-3-phosphate glycosyltransferase
DLDIKGPM_01223	CDS	477				hypothetical protein
DLDIKGPM_01224	CDS	582	gmhA_1	5.3.1.28	COG0279	Phosphoheptose isomerase
DLDIKGPM_01225	CDS	1473	ubiD	4.1.1.98	COG0043	3-octaprenyl-4-hydroxybenzoate carboxy-lyase
DLDIKGPM_01226	CDS	603		3.2.2.-	COG1611	Putative cytokinin riboside 5'-monophosphate phosphoribohydrolase
DLDIKGPM_01227	CDS	543	orn	3.1.-.-	COG1949	Oligoribonuclease
DLDIKGPM_01228	CDS	498	pgpA	3.1.3.27	COG1267	Phosphatidylglycerophosphatase A
DLDIKGPM_01229	CDS	621				hypothetical protein
DLDIKGPM_01230	CDS	615				hypothetical protein
DLDIKGPM_01231	CDS	1119				hypothetical protein
DLDIKGPM_01232	CDS	786	mkl		COG1127	putative ribonucleotide transport ATP-binding protein mkl
DLDIKGPM_01233	CDS	942				hypothetical protein
DLDIKGPM_01234	CDS	588				hypothetical protein
DLDIKGPM_01235	CDS	891				hypothetical protein
DLDIKGPM_01236	CDS	426		2.3.1.-		Acetyltransferase
DLDIKGPM_01237	CDS	678	ung	3.2.2.27	COG0692	Uracil-DNA glycosylase
DLDIKGPM_01238	CDS	1032	legI	2.5.1.101	COG2089	N,N'-diacetyllegionaminic acid synthase
DLDIKGPM_01239	CDS	1137	siaA	3.2.1.183	COG0381	UDP-N-acetylglucosamine 2-epimerase
DLDIKGPM_01240	CDS	675	neuA	2.7.7.43	COG1083	N-acylneuraminate cytidylyltransferase
DLDIKGPM_01241	CDS	1212				hypothetical protein
DLDIKGPM_01242	CDS	981	lst	2.4.99.-		CMP-N-acetylneuraminate:beta-galactoside alpha-2,3-sialyltransferase
DLDIKGPM_01243	CDS	1275	wecA	2.7.8.40		UDP-N-acetylgalactosamine-undecaprenyl-phosphate N-acetylgalactosaminephosphotransferase
DLDIKGPM_01244	CDS	966				hypothetical protein
DLDIKGPM_01245	CDS	1011				hypothetical protein
DLDIKGPM_01246	CDS	327				hypothetical protein
DLDIKGPM_01247	CDS	861				hypothetical protein
DLDIKGPM_01248	CDS	1008	arnC	2.4.2.53		Undecaprenyl-phosphate 4-deoxy-4-formamido-L-arabinose transferase
DLDIKGPM_01249	CDS	894				hypothetical protein
DLDIKGPM_01250	CDS	1113	pglA	2.4.1.290		N,N'-diacetylbacillosaminyl-diphospho-undecaprenol alpha-1,3-N-acetylgalactosaminyltransferase
DLDIKGPM_01251	CDS	873	galU	2.7.7.9	COG1210	UTP--glucose-1-phosphate uridylyltransferase
DLDIKGPM_01252	CDS	1170	tuaD	1.1.1.22	COG1004	UDP-glucose 6-dehydrogenase TuaD
DLDIKGPM_01253	CDS	1626	pgi	5.3.1.9	COG0166	Glucose-6-phosphate isomerase
DLDIKGPM_01254	CDS	1017	galE_1	5.1.3.2	COG1087	UDP-glucose 4-epimerase
DLDIKGPM_01255	CDS	1605				hypothetical protein
DLDIKGPM_01256	CDS	1368	algC	5.4.2.2	COG1109	Phosphomannomutase/phosphoglucomutase
DLDIKGPM_01257	CDS	2745	polA	2.7.7.7	COG0258	DNA polymerase I
DLDIKGPM_01258	CDS	345	yfdG		COG2246	Prophage bactoprenol-linked glucose translocase
DLDIKGPM_01259	CDS	942	yfdH	2.4.1.-	COG0463	Prophage bactoprenol glucosyl transferase
DLDIKGPM_01260	CDS	1629				hypothetical protein
DLDIKGPM_01261	CDS	768	xthA	3.1.11.2	COG0708	Exodeoxyribonuclease III
DLDIKGPM_01262	CDS	873	dapA	4.3.3.7	COG0329	4-hydroxy-tetrahydrodipicolinate synthase
DLDIKGPM_01263	CDS	1047	bamC			Outer membrane protein assembly factor BamC
DLDIKGPM_01264	CDS	1845	mutL			DNA mismatch repair protein MutL
DLDIKGPM_01265	CDS	819	aroE	1.1.1.25	COG0169	Shikimate dehydrogenase (NADP(+))
DLDIKGPM_01266	CDS	750	ubiE	2.1.1.163	COG2226	Ubiquinone/menaquinone biosynthesis C-methyltransferase UbiE
DLDIKGPM_01267	CDS	1626	ubiB	2.7.-.-	COG0661	putative protein kinase UbiB
DLDIKGPM_01268	CDS	432				Cytochrome c'
DLDIKGPM_01269	CDS	1098	spuE		COG0687	Spermidine-binding periplasmic protein SpuE
DLDIKGPM_01270	CDS	345				hypothetical protein
DLDIKGPM_01271	CDS	1233				hypothetical protein
DLDIKGPM_01272	CDS	531				hypothetical protein
DLDIKGPM_01273	CDS	651				hypothetical protein
DLDIKGPM_01274	CDS	363				hypothetical protein
DLDIKGPM_01275	CDS	954	trxB	1.8.1.9	COG0492	Thioredoxin reductase
DLDIKGPM_01276	CDS	1176	pgk	2.7.2.3	COG0126	Phosphoglycerate kinase
DLDIKGPM_01277	CDS	1524	rng	3.1.26.-	COG1530	Ribonuclease G
DLDIKGPM_01278	CDS	1203	coaBC		COG0452	Coenzyme A biosynthesis bifunctional protein CoaBC
DLDIKGPM_01279	CDS	1161				hypothetical protein
DLDIKGPM_01280	CDS	981	gpsA	1.1.1.94	COG0240	Glycerol-3-phosphate dehydrogenase [NAD(P)+]
DLDIKGPM_01281	CDS	180				hypothetical protein
DLDIKGPM_01282	CDS	660	menH_3	4.2.99.20		2-succinyl-6-hydroxy-2,4-cyclohexadiene-1-carboxylate synthase
DLDIKGPM_01283	CDS	810	metQ_4		COG1464	putative D-methionine-binding lipoprotein MetQ
DLDIKGPM_01284	CDS	1008	vldW	1.14.11.52		Validamycin A dioxygenase
DLDIKGPM_01285	CDS	1824		3.6.3.-	COG1132	Putative multidrug export ATP-binding/permease protein
DLDIKGPM_01286	CDS	1512	ilvA	4.3.1.19	COG1171	L-threonine dehydratase biosynthetic IlvA
DLDIKGPM_01287	CDS	519	nadR_2		COG1056	Bifunctional NAD biosynthesis protein NadR
DLDIKGPM_01288	CDS	1479	ywiE	2.7.8.-	COG1502	putative cardiolipin synthase YwiE
DLDIKGPM_01289	CDS	243				hypothetical protein
DLDIKGPM_01290	CDS	2244	nrdA	1.17.4.1	COG0209	Ribonucleoside-diphosphate reductase 1 subunit alpha
DLDIKGPM_01291	CDS	1107	nrdB	1.17.4.1	COG0208	Ribonucleoside-diphosphate reductase 1 subunit beta
DLDIKGPM_01292	CDS	246				hypothetical protein
DLDIKGPM_01293	CDS	480				hypothetical protein
DLDIKGPM_01294	CDS	480				hypothetical protein
DLDIKGPM_01295	CDS	603	pnuC_2		COG3201	Nicotinamide riboside transporter PnuC
DLDIKGPM_01296	CDS	648				hypothetical protein
DLDIKGPM_01297	CDS	678				hypothetical protein
DLDIKGPM_01298	CDS	972	panS		COG0385	Pantothenate precursors transporter PanS
DLDIKGPM_01299	CDS	315	rplU		COG0261	50S ribosomal protein L21
DLDIKGPM_01300	CDS	261	rpmA		COG0211	50S ribosomal protein L27
DLDIKGPM_01301	CDS	1068	obg	3.6.5.-		GTPase Obg
DLDIKGPM_01302	CDS	438				hypothetical protein
DLDIKGPM_01303	CDS	1305	aroP		COG1113	Aromatic amino acid transport protein AroP
DLDIKGPM_01304	CDS	1920	rlhA		COG0826	23S rRNA 5-hydroxycytidine synthase
DLDIKGPM_01305	tRNA	74				tRNA-Val(tac)
DLDIKGPM_01306	tRNA	76				tRNA-Asp(gtc)
DLDIKGPM_01307	tRNA	77				tRNA-Asp(gtc)
DLDIKGPM_01308	CDS	888	galE_2	5.1.3.2	COG1087	UDP-glucose 4-epimerase
DLDIKGPM_01309	CDS	660				hypothetical protein
DLDIKGPM_01310	CDS	1110	selU	2.5.1.-	COG2603	tRNA 2-selenouridine synthase
DLDIKGPM_01311	CDS	1416	ftsY			Signal recognition particle receptor FtsY
DLDIKGPM_01312	CDS	1131				hypothetical protein
DLDIKGPM_01313	CDS	1086	tal	2.2.1.2		Transaldolase
DLDIKGPM_01314	CDS	1200	fabV	1.3.1.9		Enoyl-[acyl-carrier-protein] reductase [NADH]
DLDIKGPM_01315	CDS	891	tyrC	1.3.1.43		Cyclohexadienyl dehydrogenase
DLDIKGPM_01316	CDS	2088	relA	2.7.6.5	COG0317	GTP pyrophosphokinase
DLDIKGPM_01317	CDS	444	hslJ		COG3187	Heat shock protein HslJ
DLDIKGPM_01318	CDS	2202	copA_2	7.2.2.8		putative copper-importing P-type ATPase A
DLDIKGPM_01319	CDS	213	merP			Mercuric transport protein periplasmic component
DLDIKGPM_01320	CDS	447	copY			Transcriptional repressor CopY
DLDIKGPM_01321	CDS	468		1.11.1.15		Peroxiredoxin
DLDIKGPM_01322	CDS	360				hypothetical protein
DLDIKGPM_01323	CDS	948				hypothetical protein
DLDIKGPM_01324	CDS	483	queF	1.7.1.13	COG0780	NADPH-dependent 7-cyano-7-deazaguanine reductase
DLDIKGPM_01325	CDS	423				hypothetical protein
DLDIKGPM_01326	CDS	2754	valS	6.1.1.9	COG0525	Valine--tRNA ligase
DLDIKGPM_01327	CDS	2289	ydeP		COG0243	Protein YdeP
DLDIKGPM_01328	CDS	1470	ppx	3.6.1.11	COG0248	Exopolyphosphatase
DLDIKGPM_01329	CDS	810	rsmA	2.1.1.182	COG0030	Ribosomal RNA small subunit methyltransferase A
DLDIKGPM_01330	CDS	984	surA	5.2.1.8	COG0760	Chaperone SurA
DLDIKGPM_01331	CDS	657	proQ			RNA chaperone ProQ
DLDIKGPM_01332	CDS	1707	argS	6.1.1.19		Arginine--tRNA ligase
DLDIKGPM_01333	CDS	771	ftsN_1			Cell division protein FtsN
DLDIKGPM_01334	CDS	558	ssb_1			Single-stranded DNA-binding protein
DLDIKGPM_01335	CDS	1239	chaA		COG0387	Sodium-potassium/proton antiporter ChaA
DLDIKGPM_01336	CDS	1824	typA		COG1217	GTP-binding protein TypA/BipA
DLDIKGPM_01337	CDS	318	ydhR	1.-.-.-		Putative monooxygenase YdhR
DLDIKGPM_01338	CDS	216	rpsU		COG0828	30S ribosomal protein S21
DLDIKGPM_01339	CDS	1383	degP	3.4.21.107	COG0265	Periplasmic serine endoprotease DegP
DLDIKGPM_01340	CDS	624				hypothetical protein
DLDIKGPM_01341	CDS	1341	rlmD	2.1.1.190	COG2265	23S rRNA (uracil(1939)-C(5))-methyltransferase RlmD
DLDIKGPM_01342	CDS	675	gph_1	3.1.3.18	COG0546	Phosphoglycolate phosphatase
DLDIKGPM_01343	CDS	891	rdgC		COG2974	Recombination-associated protein RdgC
DLDIKGPM_01344	CDS	1899	parE	5.6.2.2	COG0187	DNA topoisomerase 4 subunit B
DLDIKGPM_01345	CDS	1038				hypothetical protein
DLDIKGPM_01346	CDS	564				hypothetical protein
DLDIKGPM_01347	CDS	669				hypothetical protein
DLDIKGPM_01348	CDS	594				hypothetical protein
DLDIKGPM_01349	CDS	2094	sctC			Type 3 secretion system secretin
DLDIKGPM_01350	CDS	567	aroK	2.7.1.71	COG0703	Shikimate kinase 1
DLDIKGPM_01351	CDS	1086	aroB	4.2.3.4	COG0337	3-dehydroquinate synthase
DLDIKGPM_01352	CDS	1251				hypothetical protein
DLDIKGPM_01353	CDS	615			COG1309	putative HTH-type transcriptional regulator
DLDIKGPM_01354	CDS	1926	uup		COG0488	ABC transporter ATP-binding protein uup
DLDIKGPM_01355	CDS	1530	cat1	2.8.3.-	COG0427	Succinyl-CoA:coenzyme A transferase
DLDIKGPM_01356	CDS	393				hypothetical protein
DLDIKGPM_01357	CDS	975	kdsD	5.3.1.13	COG0517	Arabinose 5-phosphate isomerase KdsD
DLDIKGPM_01358	CDS	1971	rep_2	3.6.4.12	COG0210	ATP-dependent DNA helicase Rep
DLDIKGPM_01359	CDS	1365	dnaA		COG0593	Chromosomal replication initiator protein DnaA
DLDIKGPM_01360	CDS	399				hypothetical protein
DLDIKGPM_01361	CDS	777	occP			Octopine permease ATP-binding protein P
DLDIKGPM_01362	CDS	1749	tamA		COG0729	Translocation and assembly module subunit TamA
DLDIKGPM_01363	CDS	1293	tilS	6.3.4.19	COG0037	tRNA(Ile)-lysidine synthase
DLDIKGPM_01364	CDS	888	rapZ		COG1660	RNase adapter protein RapZ
DLDIKGPM_01365	CDS	882	folD		COG0190	Bifunctional protein FolD protein
DLDIKGPM_01366	tRNA	83				tRNA-Leu(tag)
DLDIKGPM_01367	CDS	1302	tig	5.2.1.8	COG0544	Trigger factor
DLDIKGPM_01368	CDS	1239				hypothetical protein
DLDIKGPM_01369	CDS	1119				hypothetical protein
DLDIKGPM_01370	CDS	1119				hypothetical protein
DLDIKGPM_01371	CDS	612	kpsM		COG1682	Polysialic acid transport protein KpsM
DLDIKGPM_01372	CDS	660	kpsT			Polysialic acid transport ATP-binding protein KpsT
DLDIKGPM_01373	CDS	1140	sacA_1	5.1.3.14		UDP-N-acetylglucosamine 2-epimerase
DLDIKGPM_01374	CDS	1257	wecC	1.1.1.336	COG0677	UDP-N-acetyl-D-mannosamine dehydrogenase
DLDIKGPM_01375	CDS	2922				hypothetical protein
DLDIKGPM_01376	CDS	1533				hypothetical protein
DLDIKGPM_01377	CDS	1098				hypothetical protein
DLDIKGPM_01378	CDS	972				hypothetical protein
DLDIKGPM_01379	CDS	2037				hypothetical protein
DLDIKGPM_01380	CDS	1683	leuA	2.3.3.13	COG0119	2-isopropylmalate synthase
DLDIKGPM_01381	CDS	1203	metK	2.5.1.6	COG0192	S-adenosylmethionine synthase
DLDIKGPM_01382	CDS	135				hypothetical protein
DLDIKGPM_01383	CDS	348	rnpA	3.1.26.5	COG0594	Ribonuclease P protein component
DLDIKGPM_01384	CDS	1695	yidC		COG0706	Membrane protein insertase YidC
DLDIKGPM_01385	CDS	1326	mnmE	3.6.-.-	COG0486	tRNA modification GTPase MnmE
DLDIKGPM_01386	CDS	1380	radA	3.6.4.-	COG1066	DNA repair protein RadA
DLDIKGPM_01387	CDS	267	hfq		COG1923	RNA-binding protein Hfq
DLDIKGPM_01388	CDS	1290	hflX		COG2262	GTPase HflX
DLDIKGPM_01389	CDS	1278	hflK		COG0330	Modulator of FtsH protease HflK
DLDIKGPM_01390	CDS	885	hflC		COG0330	Modulator of FtsH protease HflC
DLDIKGPM_01391	CDS	1299	purA	6.3.4.4	COG0104	Adenylosuccinate synthetase
DLDIKGPM_01392	CDS	600				hypothetical protein
DLDIKGPM_01393	CDS	1209	gltS_2		COG0786	Sodium/glutamate symporter
DLDIKGPM_01394	CDS	936	hutG	3.5.3.8	COG0010	Formimidoylglutamase
DLDIKGPM_01395	CDS	729	kdgR		COG1414	Transcriptional regulator KdgR
DLDIKGPM_01396	CDS	1317				hypothetical protein
DLDIKGPM_01397	CDS	1356		3.4.24.-	COG0612	putative zinc protease
DLDIKGPM_01398	CDS	723	yciK	1.-.-.-	COG1028	putative oxidoreductase YciK
DLDIKGPM_01399	CDS	717	ubiG	2.1.1.222	COG2227	Ubiquinone biosynthesis O-methyltransferase
DLDIKGPM_01400	CDS	612	cvpA		COG1286	Colicin V production protein
DLDIKGPM_01401	CDS	735	ftsN_2			Cell division protein FtsN
DLDIKGPM_01402	CDS	1278	folC	6.3.2.12	COG0285	Dihydrofolate synthase/folylpolyglutamate synthase
DLDIKGPM_01403	CDS	912	accD	2.1.3.15	COG0777	Acetyl-coenzyme A carboxylase carboxyl transferase subunit beta
DLDIKGPM_01404	CDS	456	sufU	2.-.-.-	COG0822	Zinc-dependent sulfurtransferase SufU
DLDIKGPM_01405	CDS	387				hypothetical protein
DLDIKGPM_01406	CDS	192				hypothetical protein
DLDIKGPM_01407	CDS	1347	accC	6.3.4.14	COG0439	Biotin carboxylase
DLDIKGPM_01408	CDS	468	accB		COG0511	Biotin carboxyl carrier protein of acetyl-CoA carboxylase
DLDIKGPM_01409	CDS	471	aroQ	4.2.1.10	COG0757	3-dehydroquinate dehydratase
DLDIKGPM_01410	CDS	417				hypothetical protein
DLDIKGPM_01411	CDS	951				hypothetical protein
DLDIKGPM_01412	CDS	1242	mtr			Tryptophan-specific transport protein
DLDIKGPM_01413	CDS	891				hypothetical protein
DLDIKGPM_01414	CDS	1635	nhaK		COG0025	Sodium, potassium, lithium and rubidium/H(+) antiporter
DLDIKGPM_01415	CDS	906	rarD		COG2962	Protein RarD
DLDIKGPM_01416	CDS	660	rluA	5.4.99.28	COG0564	Dual-specificity RNA pseudouridine synthase RluA
DLDIKGPM_01417	CDS	1320				hypothetical protein
DLDIKGPM_01418	CDS	756	ucpA	1.-.-.-		Oxidoreductase UcpA
DLDIKGPM_01419	CDS	771	ygiD	1.13.11.29	COG3384	4,5-DOPA dioxygenase extradiol
DLDIKGPM_01420	CDS	1125	carA	6.3.5.5	COG0505	Carbamoyl-phosphate synthase small chain
DLDIKGPM_01421	CDS	3219	carB	6.3.5.5	COG0458	Carbamoyl-phosphate synthase large chain
DLDIKGPM_01422	CDS	948				hypothetical protein
DLDIKGPM_01423	CDS	285				hypothetical protein
DLDIKGPM_01424	CDS	1251	glyA	2.1.2.1	COG0112	Serine hydroxymethyltransferase
DLDIKGPM_01425	CDS	666	pcm	2.1.1.77		Protein-L-isoaspartate O-methyltransferase
DLDIKGPM_01426	CDS	2244	parC	5.6.2.2	COG0188	DNA topoisomerase 4 subunit A
DLDIKGPM_01427	CDS	615	rplY			50S ribosomal protein L25
DLDIKGPM_01428	CDS	567	pth	3.1.1.29		Peptidyl-tRNA hydrolase
DLDIKGPM_01429	CDS	1092	ychF		COG0012	Ribosome-binding ATPase YchF
DLDIKGPM_01430	CDS	225				hypothetical protein
DLDIKGPM_01431	CDS	408				hypothetical protein
DLDIKGPM_01432	CDS	144				hypothetical protein
DLDIKGPM_01433	CDS	4503				hypothetical protein
DLDIKGPM_01434	CDS	1440	gadC_3		COG0531	Glutamate/gamma-aminobutyrate antiporter
DLDIKGPM_01435	CDS	1377	gadA	4.1.1.15	COG0076	Glutamate decarboxylase
DLDIKGPM_01436	CDS	1299	guaD	3.5.4.3	COG0402	Guanine deaminase
DLDIKGPM_01437	CDS	495				hypothetical protein
DLDIKGPM_01438	CDS	1239	dadA1_2	1.4.99.-	COG0665	D-amino acid dehydrogenase 1
DLDIKGPM_01439	CDS	891	hdfR			HTH-type transcriptional regulator HdfR
DLDIKGPM_01440	CDS	411	greB_1		COG0782	Transcription elongation factor GreB
DLDIKGPM_01441	CDS	1335				hypothetical protein
DLDIKGPM_01442	CDS	2706				hypothetical protein
DLDIKGPM_01443	CDS	615				hypothetical protein
DLDIKGPM_01444	CDS	471	greB_2		COG0782	Transcription elongation factor GreB
DLDIKGPM_01445	CDS	495				hypothetical protein
DLDIKGPM_01446	CDS	981				hypothetical protein
DLDIKGPM_01447	CDS	1026				hypothetical protein
DLDIKGPM_01448	CDS	612	cas6f_2	3.1.-.-		CRISPR-associated endonuclease Cas6/Csy4
	repeat_region	143
DLDIKGPM_01449	CDS	882				hypothetical protein
DLDIKGPM_01450	CDS	174				hypothetical protein
DLDIKGPM_01451	CDS	135				hypothetical protein
DLDIKGPM_01452	CDS	1038				hypothetical protein
DLDIKGPM_01453	CDS	1728				hypothetical protein
DLDIKGPM_01454	CDS	480				hypothetical protein
DLDIKGPM_01455	CDS	1587				hypothetical protein
DLDIKGPM_01456	CDS	1224				hypothetical protein
DLDIKGPM_01457	CDS	144	greB_3		COG0782	Transcription elongation factor GreB
DLDIKGPM_01458	CDS	411				putative protein/HI_1462.1
DLDIKGPM_01459	CDS	396				hypothetical protein
DLDIKGPM_01460	CDS	1272	proA	1.2.1.41		Gamma-glutamyl phosphate reductase
DLDIKGPM_01461	CDS	333	grxD		COG0278	Glutaredoxin 4
DLDIKGPM_01462	CDS	636	upp	2.4.2.9	COG0035	Uracil phosphoribosyltransferase
DLDIKGPM_01463	CDS	1896	slt	4.2.2.-	COG0741	Soluble lytic murein transglycosylase
DLDIKGPM_01464	CDS	483				hypothetical protein
DLDIKGPM_01465	CDS	1560	rcsC_2	2.7.13.3		Sensor histidine kinase RcsC
DLDIKGPM_01466	CDS	1392	zraR		COG2204	Transcriptional regulatory protein ZraR
DLDIKGPM_01467	CDS	1179	cinA			Putative competence-damage inducible protein
DLDIKGPM_01468	CDS	414	mutT	3.6.1.55	COG0494	8-oxo-dGTP diphosphatase
DLDIKGPM_01469	CDS	1407	pykF	2.7.1.40	COG0469	Pyruvate kinase I
DLDIKGPM_01470	CDS	1368	mepA_3			Multidrug export protein MepA
DLDIKGPM_01471	CDS	915				hypothetical protein
DLDIKGPM_01472	CDS	3099	ttrA	1.8.-.-	COG0243	Tetrathionate reductase subunit A
DLDIKGPM_01473	CDS	1077	ttrC			Tetrathionate reductase subunit C
DLDIKGPM_01474	CDS	735	ttrB		COG0437	Tetrathionate reductase subunit B
DLDIKGPM_01475	CDS	1761	ttrS	2.7.13.3	COG0642	Tetrathionate sensor histidine kinase TtrS
DLDIKGPM_01476	CDS	588	ttrR		COG4566	Tetrathionate response regulatory protein TtrR
DLDIKGPM_01477	CDS	978	pucA	1.17.1.4	COG1975	putative xanthine dehydrogenase subunit A
DLDIKGPM_01478	CDS	1245	nicB	1.17.2.1	COG1529	Nicotinate dehydrogenase subunit B
DLDIKGPM_01479	CDS	549	hcrC	1.3.7.9		4-hydroxybenzoyl-CoA reductase subunit gamma
DLDIKGPM_01480	CDS	2805				hypothetical protein
DLDIKGPM_01481	CDS	2895				hypothetical protein
DLDIKGPM_01482	CDS	1689				hypothetical protein
DLDIKGPM_01483	CDS	759			COG0327	GTP cyclohydrolase 1 type 2
DLDIKGPM_01484	CDS	3285				hypothetical protein
DLDIKGPM_01485	CDS	1080				hypothetical protein
DLDIKGPM_01486	CDS	858				hypothetical protein
DLDIKGPM_01487	CDS	669				hypothetical protein
DLDIKGPM_01488	CDS	993	trpS	6.1.1.2	COG0180	Tryptophan--tRNA ligase
DLDIKGPM_01489	CDS	792	scpA		COG1354	Segregation and condensation protein A
DLDIKGPM_01490	tRNA	75				tRNA-Gln(ttg)
DLDIKGPM_01491	CDS	951	prs	2.7.6.1	COG0462	Ribose-phosphate pyrophosphokinase
DLDIKGPM_01492	CDS	273			COG2924	putative Fe(2+)-trafficking protein
DLDIKGPM_01493	CDS	558	ddpX_2	3.4.13.22	COG2173	D-alanyl-D-alanine dipeptidase
DLDIKGPM_01494	tRNA	77				tRNA-Met(cat)
DLDIKGPM_01495	CDS	237				hypothetical protein
DLDIKGPM_01496	CDS	1077	fic	2.7.7.-	COG3177	Protein adenylyltransferase SoFic
DLDIKGPM_01497	CDS	270				hypothetical protein
DLDIKGPM_01498	CDS	234	ybcJ		COG2501	putative protein YbcJ
DLDIKGPM_01499	CDS	1260	davT_4	2.6.1.48	COG0160	5-aminovalerate aminotransferase DavT
DLDIKGPM_01500	CDS	1389			COG5383	putative protein
DLDIKGPM_01501	CDS	906	cyoA		COG1622	Cytochrome bo(3) ubiquinol oxidase subunit 2
DLDIKGPM_01502	CDS	2007	cyoB	7.1.1.3	COG0843	Cytochrome bo(3) ubiquinol oxidase subunit 1
DLDIKGPM_01503	CDS	609	cyoC		COG1845	Cytochrome bo(3) ubiquinol oxidase subunit 3
DLDIKGPM_01504	CDS	327	cyoD		COG3125	Cytochrome bo(3) ubiquinol oxidase subunit 4
DLDIKGPM_01505	CDS	852	cyoE	2.5.1.141	COG0109	Protoheme IX farnesyltransferase
DLDIKGPM_01506	CDS	576	cetB	5.1.3.33		2-epi-5-epi-valiolone epimerase
DLDIKGPM_01507	CDS	492	rutC_1	1.-.-.-		Putative aminoacrylate peracid reductase RutC
DLDIKGPM_01508	CDS	786	ybfF	3.1.-.-	COG0596	Esterase YbfF
DLDIKGPM_01509	CDS	1245			COG1055	putative transporter
DLDIKGPM_01510	CDS	345				hypothetical protein
DLDIKGPM_01511	CDS	927	rsmH	2.1.1.199	COG0275	Ribosomal RNA small subunit methyltransferase H
DLDIKGPM_01512	CDS	324	ftsL			Cell division protein FtsL
DLDIKGPM_01513	CDS	1755	ftsI	3.4.16.4	COG0768	Peptidoglycan D,D-transpeptidase FtsI
DLDIKGPM_01514	CDS	1485	murE	6.3.2.13	COG0769	UDP-N-acetylmuramoyl-L-alanyl-D-glutamate--2,6-diaminopimelate ligase
DLDIKGPM_01515	CDS	1350	murF	6.3.2.10	COG0770	UDP-N-acetylmuramoyl-tripeptide--D-alanyl-D-alanine ligase
DLDIKGPM_01516	CDS	1083	mraY	2.7.8.13	COG0472	Phospho-N-acetylmuramoyl-pentapeptide-transferase
DLDIKGPM_01517	CDS	600	yigZ		COG1739	IMPACT family member YigZ
DLDIKGPM_01518	CDS	444				hypothetical protein
DLDIKGPM_01519	CDS	798	pdxK	2.7.1.35	COG0351	Pyridoxine kinase
DLDIKGPM_01520	CDS	1377	hemN	1.3.98.3	COG0635	Oxygen-independent coproporphyrinogen III oxidase
DLDIKGPM_01521	CDS	1431	pykA	2.7.1.40	COG0469	Pyruvate kinase II
DLDIKGPM_01522	CDS	645	queH	1.17.99.6	COG1636	Epoxyqueuosine reductase QueH
DLDIKGPM_01523	CDS	849	sseB	2.8.1.1	COG2897	Putative thiosulfate sulfurtransferase SseB
DLDIKGPM_01524	CDS	855				hypothetical protein
DLDIKGPM_01525	CDS	1152	nhaA		COG3004	Na(+)/H(+) antiporter NhaA
DLDIKGPM_01526	CDS	1284	sqr	1.8.5.4	COG0446	Sulfide-quinone reductase
DLDIKGPM_01527	CDS	1368	purB	4.3.2.2	COG0015	Adenylosuccinate lyase
DLDIKGPM_01528	CDS	399				hypothetical protein
DLDIKGPM_01529	CDS	369	yfgD		COG1393	putative protein YfgD
DLDIKGPM_01530	CDS	1557	rep_3	3.6.4.12		ATP-dependent DNA helicase Rep
DLDIKGPM_01531	CDS	792	nadX	1.4.1.21	COG1712	L-aspartate dehydrogenase
DLDIKGPM_01532	CDS	1425	pntB	7.1.1.1	COG1282	NAD(P) transhydrogenase subunit beta
DLDIKGPM_01533	CDS	282	pntA	7.1.1.1	COG3288	NAD(P) transhydrogenase subunit alpha
DLDIKGPM_01534	CDS	1116	pntAA	7.1.1.1	COG3288	NAD(P) transhydrogenase subunit alpha part 1
DLDIKGPM_01535	CDS	552				hypothetical protein
DLDIKGPM_01536	CDS	1434	dnaB	3.6.4.12	COG0305	Replicative DNA helicase
DLDIKGPM_01537	CDS	657				hypothetical protein
DLDIKGPM_01538	CDS	642	pyrE_2	2.4.2.10	COG0461	Orotate phosphoribosyltransferase
DLDIKGPM_01539	CDS	603	nudF	3.6.1.13		ADP-ribose pyrophosphatase
DLDIKGPM_01540	CDS	618	yciO		COG0009	putative protein YciO
DLDIKGPM_01541	CDS	357	rplS		COG0335	50S ribosomal protein L19
DLDIKGPM_01542	CDS	852				hypothetical protein
DLDIKGPM_01543	CDS	1254				hypothetical protein
DLDIKGPM_01544	CDS	885	htpX	3.4.24.-	COG0501	Protease HtpX
DLDIKGPM_01545	CDS	1008				hypothetical protein
DLDIKGPM_01546	CDS	1563	putP		COG0591	Sodium/proline symporter
DLDIKGPM_01547	CDS	468	ybeY	3.1.-.-	COG0319	Endoribonuclease YbeY
DLDIKGPM_01548	CDS	963	ybeZ		COG1702	PhoH-like protein
DLDIKGPM_01549	CDS	1692				hypothetical protein
DLDIKGPM_01550	CDS	381	yabJ	3.5.99.10	COG0251	2-iminobutanoate/2-iminopropanoate deaminase
DLDIKGPM_01551	CDS	690	rsuA_2	5.4.99.19	COG1187	Ribosomal small subunit pseudouridine synthase A
DLDIKGPM_01552	CDS	1035	rlmG	2.1.1.174	COG2813	Ribosomal RNA large subunit methyltransferase G
DLDIKGPM_01553	CDS	1614	pckA	4.1.1.49	COG1866	Phosphoenolpyruvate carboxykinase (ATP)
DLDIKGPM_01554	CDS	1161	dacC	3.4.16.4	COG1686	D-alanyl-D-alanine carboxypeptidase DacC
DLDIKGPM_01555	CDS	843	rlpA	4.2.2.-		Endolytic peptidoglycan transglycosylase RlpA
DLDIKGPM_01556	CDS	1035				Tn3 family transposase TnXax1
DLDIKGPM_01557	CDS	1137	mrdB	2.4.1.129	COG0772	Peptidoglycan glycosyltransferase MrdB
DLDIKGPM_01558	CDS	1920	mrdA	3.4.16.4	COG0768	Peptidoglycan D,D-transpeptidase MrdA
DLDIKGPM_01559	CDS	483				hypothetical protein
DLDIKGPM_01560	CDS	879	mreC		COG1792	Cell shape-determining protein MreC
DLDIKGPM_01561	CDS	1050	mreB		COG1077	Cell shape-determining protein MreB
DLDIKGPM_01562	CDS	717	tpiA	5.3.1.1	COG0149	Triosephosphate isomerase
DLDIKGPM_01563	CDS	348				hypothetical protein
DLDIKGPM_01564	tRNA	85				tRNA-Leu(gag)
DLDIKGPM_01565	CDS	1218	epsF		COG1459	Type II secretion system protein F
DLDIKGPM_01566	CDS	930	outO			Type 4 prepilin-like proteins leader peptide-processing enzyme
DLDIKGPM_01567	CDS	630	coaE	2.7.1.24	COG0237	Dephospho-CoA kinase
DLDIKGPM_01568	CDS	714	zapD		COG4582	Cell division protein ZapD
DLDIKGPM_01569	CDS	735	fabG_2	1.1.1.100		3-oxoacyl-[acyl-carrier-protein] reductase FabG
DLDIKGPM_01570	CDS	240	acpP_3			Acyl carrier protein
DLDIKGPM_01571	CDS	1242	fabF_3	2.3.1.179	COG0304	3-oxoacyl-[acyl-carrier-protein] synthase 2
DLDIKGPM_01572	CDS	1077	mltG	4.2.2.-	COG1559	Endolytic murein transglycosylase
DLDIKGPM_01573	CDS	612	tmk	2.7.4.9	COG0125	Thymidylate kinase
DLDIKGPM_01574	CDS	942	holB	2.7.7.7	COG0470	DNA polymerase III subunit delta'
DLDIKGPM_01575	CDS	441	pilE1		COG4969	Fimbrial protein
DLDIKGPM_01576	CDS	546	pilE		COG4969	Fimbrial protein
DLDIKGPM_01577	CDS	1995	uvrB_3		COG0556	UvrABC system protein B
DLDIKGPM_01578	CDS	2481	lon	3.4.21.53		Lon protease
DLDIKGPM_01579	CDS	297	hupB		COG0776	DNA-binding protein HU-beta
DLDIKGPM_01580	CDS	3972				hypothetical protein
DLDIKGPM_01581	CDS	477				hypothetical protein
DLDIKGPM_01582	CDS	273	ubiK		COG2960	Ubiquinone biosynthesis accessory factor UbiK
DLDIKGPM_01583	CDS	546	dsbB			Disulfide bond formation protein B
DLDIKGPM_01584	CDS	384	glpE_1	2.8.1.1		Thiosulfate sulfurtransferase GlpE
DLDIKGPM_01585	CDS	372				hypothetical protein
DLDIKGPM_01586	CDS	612				hypothetical protein
DLDIKGPM_01587	CDS	564				hypothetical protein
DLDIKGPM_01588	CDS	1809	recD_1	3.1.11.5	COG0507	RecBCD enzyme subunit RecD
DLDIKGPM_01589	CDS	3234	recB	3.1.11.5		RecBCD enzyme subunit RecB
DLDIKGPM_01590	CDS	222				hypothetical protein
DLDIKGPM_01591	CDS	435				hypothetical protein
DLDIKGPM_01592	CDS	1218	ispG	1.17.7.3	COG0821	4-hydroxy-3-methylbut-2-en-1-yl diphosphate synthase (flavodoxin)
DLDIKGPM_01593	CDS	708	trmB	2.1.1.33	COG0220	tRNA (guanine-N(7)-)-methyltransferase
DLDIKGPM_01594	CDS	753	mltF	4.2.2.-		Membrane-bound lytic murein transglycosylase F
DLDIKGPM_01595	CDS	1149	adhB_2	1.1.1.1		Alcohol dehydrogenase 2
DLDIKGPM_01596	CDS	207	epmC_1	1.14.-.-	COG3101	Elongation factor P hydroxylase
DLDIKGPM_01597	CDS	1449				hypothetical protein
DLDIKGPM_01598	CDS	1974				hypothetical protein
DLDIKGPM_01599	CDS	2049				hypothetical protein
DLDIKGPM_01600	CDS	432				hypothetical protein
DLDIKGPM_01601	CDS	495	epmC_2	1.14.-.-	COG3101	Elongation factor P hydroxylase
DLDIKGPM_01602	CDS	504				hypothetical protein
DLDIKGPM_01603	CDS	2760				hypothetical protein
DLDIKGPM_01604	CDS	2151				hypothetical protein
DLDIKGPM_01605	CDS	1179				hypothetical protein
DLDIKGPM_01606	CDS	639				hypothetical protein
DLDIKGPM_01607	CDS	1758				hypothetical protein
DLDIKGPM_01608	CDS	390	epmC_3	1.14.-.-	COG3101	Elongation factor P hydroxylase
DLDIKGPM_01609	CDS	315	emrE		COG2076	Multidrug transporter EmrE
DLDIKGPM_01610	CDS	360	ebrA			Multidrug resistance protein EbrA
DLDIKGPM_01611	CDS	708	anr			Transcriptional activator protein Anr
DLDIKGPM_01612	CDS	783	thiM	2.7.1.50	COG2145	Hydroxyethylthiazole kinase
DLDIKGPM_01613	CDS	810	thiD	2.7.1.49		Hydroxymethylpyrimidine/phosphomethylpyrimidine kinase
DLDIKGPM_01614	CDS	651	thiE	2.5.1.3		Thiamine-phosphate synthase
DLDIKGPM_01615	CDS	645	nfsB	1.-.-.-	COG0778	Oxygen-insensitive NAD(P)H nitroreductase
DLDIKGPM_01616	CDS	765	lpxH	3.6.1.54	COG2908	UDP-2,3-diacylglucosamine hydrolase
DLDIKGPM_01617	CDS	501	ppiB	5.2.1.8	COG0652	Peptidyl-prolyl cis-trans isomerase B
DLDIKGPM_01618	CDS	636				hypothetical protein
DLDIKGPM_01619	CDS	1005	arcB	2.1.3.3	COG0078	Ornithine carbamoyltransferase, catabolic
DLDIKGPM_01620	CDS	1368	glmU			Bifunctional protein GlmU
DLDIKGPM_01621	CDS	318			COG4654	Cytochrome c-551
DLDIKGPM_01622	CDS	1311	hmp	1.14.12.17		Flavohemoprotein
DLDIKGPM_01623	CDS	1899				hypothetical protein
DLDIKGPM_01624	CDS	1296		1.1.99.3		Gluconate 2-dehydrogenase cytochrome c subunit
DLDIKGPM_01625	CDS	636				hypothetical protein
DLDIKGPM_01626	CDS	846				hypothetical protein
DLDIKGPM_01627	CDS	528				hypothetical protein
DLDIKGPM_01628	CDS	2064				hypothetical protein
DLDIKGPM_01629	CDS	549				hypothetical protein
DLDIKGPM_01630	CDS	486				hypothetical protein
DLDIKGPM_01631	CDS	699				hypothetical protein
DLDIKGPM_01632	CDS	2409	gyrB	5.6.2.2	COG0187	DNA gyrase subunit B
DLDIKGPM_01633	CDS	1092	recF_3		COG1195	DNA replication and repair protein RecF
DLDIKGPM_01634	CDS	1101	dnaN		COG0592	Beta sliding clamp
DLDIKGPM_01635	CDS	360	pleD			Response regulator PleD
DLDIKGPM_01636	CDS	1077	pheA			Bifunctional chorismate mutase/prephenate dehydratase
DLDIKGPM_01637	CDS	363	folB	4.1.2.25	COG1539	Dihydroneopterin aldolase
DLDIKGPM_01638	CDS	237				hypothetical protein
DLDIKGPM_01639	CDS	975				hypothetical protein
DLDIKGPM_01640	CDS	1356	ffh		COG0541	Signal recognition particle protein
DLDIKGPM_01641	CDS	795	ypjD		COG4137	Inner membrane protein YpjD
DLDIKGPM_01642	CDS	744	tatC		COG0805	Sec-independent protein translocase protein TatC
DLDIKGPM_01643	CDS	1416	gltX	6.1.1.17	COG0008	Glutamate--tRNA ligase
DLDIKGPM_01644	CDS	2073	glyS	6.1.1.14	COG0751	Glycine--tRNA ligase beta subunit
DLDIKGPM_01645	CDS	552		3.1.3.82	COG0241	D-glycero-beta-D-manno-heptose-1,7-bisphosphate 7-phosphatase
DLDIKGPM_01646	CDS	726				hypothetical protein
DLDIKGPM_01647	CDS	567				hypothetical protein
DLDIKGPM_01648	CDS	1245	argA	2.3.1.1	COG0548	Amino-acid acetyltransferase
DLDIKGPM_01649	CDS	387	phoP		COG0745	Alkaline phosphatase synthesis transcriptional regulatory protein PhoP
DLDIKGPM_01650	CDS	459	rppH_3	3.6.1.-		RNA pyrophosphohydrolase
DLDIKGPM_01651	CDS	1059	hemE	4.1.1.37	COG0407	Uroporphyrinogen decarboxylase
DLDIKGPM_01652	CDS	756	rpsB		COG0052	30S ribosomal protein S2
DLDIKGPM_01653	CDS	876	tsf		COG0264	Elongation factor Ts
DLDIKGPM_01654	CDS	1704	proS	6.1.1.15	COG0442	Proline--tRNA ligase
DLDIKGPM_01655	CDS	450				hypothetical protein
DLDIKGPM_01656	CDS	1200	hipO_3	3.5.1.32	COG1473	Hippurate hydrolase
DLDIKGPM_01657	CDS	354	ndhC	7.1.1.-		NAD(P)H-quinone oxidoreductase subunit 3
DLDIKGPM_01658	CDS	486	nuoB	7.1.1.-	COG0377	NADH-quinone oxidoreductase subunit B
DLDIKGPM_01659	CDS	696	ndhJ	7.1.1.-		NAD(P)H-quinone oxidoreductase subunit J, chloroplastic
DLDIKGPM_01660	CDS	1251	nuoD	7.1.1.-	COG0649	NADH-quinone oxidoreductase subunit D
DLDIKGPM_01661	CDS	516	nqo2	7.1.1.-	COG1905	NADH-quinone oxidoreductase chain 2
DLDIKGPM_01662	CDS	1284	nuoF	7.1.1.-		NADH-quinone oxidoreductase subunit F
DLDIKGPM_01663	CDS	2301	nqo3	7.1.1.-	COG1034	NADH-quinone oxidoreductase chain 3
DLDIKGPM_01664	CDS	1044	nuoH	7.1.1.-	COG1005	NADH-quinone oxidoreductase subunit H
DLDIKGPM_01665	CDS	492	nuoI	7.1.1.-	COG1143	NADH-quinone oxidoreductase subunit I
DLDIKGPM_01666	CDS	666	nuoJ	7.1.1.-	COG0839	NADH-quinone oxidoreductase subunit J
DLDIKGPM_01667	CDS	333	nuoK	7.1.1.-	COG0713	NADH-quinone oxidoreductase subunit K
DLDIKGPM_01668	CDS	2001	nuoL	7.1.1.-	COG1009	NADH-quinone oxidoreductase subunit L
DLDIKGPM_01669	CDS	1524	nuoM	7.1.1.-	COG1008	NADH-quinone oxidoreductase subunit M
DLDIKGPM_01670	CDS	1446	nuoN	7.1.1.-	COG1007	NADH-quinone oxidoreductase subunit N
DLDIKGPM_01671	CDS	564	mog	2.7.7.75	COG0521	Molybdopterin adenylyltransferase
DLDIKGPM_01672	CDS	459				hypothetical protein
DLDIKGPM_01673	CDS	1797	menF	5.4.4.2		Isochorismate synthase MenF
DLDIKGPM_01674	CDS	591	pabA	2.6.1.85	COG0512	Aminodeoxychorismate/anthranilate synthase component 2
DLDIKGPM_01675	CDS	1806	uvrC		COG0322	UvrABC system protein C
DLDIKGPM_01676	CDS	1782	asnB	6.3.5.4	COG0367	Asparagine synthetase [glutamine-hydrolyzing] 1
DLDIKGPM_01677	CDS	315	iscA		COG0316	Iron-binding protein IscA
DLDIKGPM_01678	CDS	768				hypothetical protein
DLDIKGPM_01679	CDS	498	coaD	2.7.7.3	COG0669	Phosphopantetheine adenylyltransferase
DLDIKGPM_01680	CDS	1071	queG	1.17.99.6	COG1600	Epoxyqueuosine reductase
DLDIKGPM_01681	CDS	480				hypothetical protein
DLDIKGPM_01682	CDS	1131	yhhJ		COG0842	Inner membrane transport permease YhhJ
DLDIKGPM_01683	CDS	2727	rbbA_2		COG0842	Ribosome-associated ATPase
DLDIKGPM_01684	CDS	1074				hypothetical protein
DLDIKGPM_01685	CDS	1668	ettA		COG0488	Energy-dependent translational throttle protein EttA
DLDIKGPM_01686	CDS	177				hypothetical protein
DLDIKGPM_01687	CDS	717	tsaB		COG1214	tRNA threonylcarbamoyladenosine biosynthesis protein TsaB
DLDIKGPM_01688	CDS	759				hypothetical protein
DLDIKGPM_01689	CDS	2004	cirA_2		COG4771	Colicin I receptor
DLDIKGPM_01690	CDS	1029	pfp	2.7.1.90		Pyrophosphate--fructose 6-phosphate 1-phosphotransferase
DLDIKGPM_01691	CDS	675	ygfZ			tRNA-modifying protein YgfZ
DLDIKGPM_01692	CDS	1068	alr	5.1.1.1	COG0787	Alanine racemase, biosynthetic
DLDIKGPM_01693	CDS	750	ydfG	1.1.1.381	COG4221	NADP-dependent 3-hydroxy acid dehydrogenase YdfG
DLDIKGPM_01694	CDS	951	epmA	6.3.1.-	COG2269	Elongation factor P--(R)-beta-lysine ligase
DLDIKGPM_01695	CDS	3294				hypothetical protein
DLDIKGPM_01696	CDS	933	ghrA	1.1.1.79	COG0111	Glyoxylate/hydroxypyruvate reductase A
DLDIKGPM_01697	CDS	261				hypothetical protein
DLDIKGPM_01698	CDS	732	rlmB	2.1.1.185	COG0566	23S rRNA (guanosine-2'-O-)-methyltransferase RlmB
DLDIKGPM_01699	CDS	1077	fbaA	4.1.2.13	COG0191	Fructose-bisphosphate aldolase class 2
DLDIKGPM_01700	CDS	843				hypothetical protein
DLDIKGPM_01701	CDS	3369	mfd	3.6.4.-	COG1197	Transcription-repair-coupling factor
DLDIKGPM_01702	CDS	2202	rlmL		COG0116	Ribosomal RNA large subunit methyltransferase K/L
DLDIKGPM_01703	CDS	11205				hypothetical protein
DLDIKGPM_01704	CDS	2229				hypothetical protein
DLDIKGPM_01705	CDS	564	yagU		COG3477	Inner membrane protein YagU
DLDIKGPM_01706	CDS	453	cymR_2			HTH-type transcriptional regulator CymR
DLDIKGPM_01707	CDS	1449	sufB		COG0719	FeS cluster assembly protein SufB
DLDIKGPM_01708	CDS	768	sufC		COG0396	putative ATP-dependent transporter SufC
DLDIKGPM_01709	CDS	1092				hypothetical protein
DLDIKGPM_01710	CDS	1218	sufS	2.8.1.7	COG0520	Cysteine desulfurase
DLDIKGPM_01711	CDS	573				hypothetical protein
DLDIKGPM_01712	CDS	942	yhbE		COG0697	putative inner membrane transporter YhbE
DLDIKGPM_01713	CDS	852	cntI			Pseudopaline exporter CntI
DLDIKGPM_01714	CDS	723	pagN		COG3637	Outer membrane protein PagN
DLDIKGPM_01715	CDS	690				hypothetical protein
DLDIKGPM_01716	CDS	2964				hypothetical protein
DLDIKGPM_01717	CDS	432	glpE_2	2.8.1.1		Thiosulfate sulfurtransferase GlpE
DLDIKGPM_01718	CDS	252	grxC		COG0695	Glutaredoxin 3
DLDIKGPM_01719	CDS	468	secB		COG1952	Protein-export protein SecB
DLDIKGPM_01720	CDS	1032	holA	2.7.7.7	COG1466	DNA polymerase III subunit delta
DLDIKGPM_01721	CDS	579	scpB		COG1386	Segregation and condensation protein B
DLDIKGPM_01722	CDS	1266	lolC_1		COG4591	Lipoprotein-releasing system transmembrane protein LolC
DLDIKGPM_01723	CDS	1254	lolC_2		COG4591	Lipoprotein-releasing system transmembrane protein LolC
DLDIKGPM_01724	CDS	684	lolD_1	3.6.3.-	COG1136	Lipoprotein-releasing system ATP-binding protein LolD
DLDIKGPM_01725	CDS	672	dedA		COG0586	Protein DedA
DLDIKGPM_01726	CDS	1257	rho	3.6.4.-	COG1158	Transcription termination factor Rho
DLDIKGPM_01727	CDS	243	rpmE2		COG0254	50S ribosomal protein L31 type B
DLDIKGPM_01728	CDS	1278	gltA	2.3.3.16	COG0372	Citrate synthase
DLDIKGPM_01729	CDS	1020	pyrB	2.1.3.2	COG0540	Aspartate carbamoyltransferase
DLDIKGPM_01730	CDS	1287	eno	4.2.1.11		Enolase
DLDIKGPM_01731	CDS	387				hypothetical protein
DLDIKGPM_01732	CDS	294				hypothetical protein
DLDIKGPM_01733	CDS	939	truB	5.4.99.25	COG0130	tRNA pseudouridine synthase B
DLDIKGPM_01734	CDS	378	rbfA		COG0858	Ribosome-binding factor A
DLDIKGPM_01735	CDS	2694	infB			Translation initiation factor IF-2
DLDIKGPM_01736	CDS	1491	nusA		COG0195	Transcription termination/antitermination protein NusA
DLDIKGPM_01737	CDS	513	rimP			Ribosome maturation factor RimP
DLDIKGPM_01738	tRNA	77				tRNA-Met(cat)
DLDIKGPM_01739	CDS	1209				hypothetical protein
DLDIKGPM_01740	CDS	384				hypothetical protein
DLDIKGPM_01741	CDS	312				hypothetical protein
DLDIKGPM_01742	CDS	765	argT		COG0834	Lysine/arginine/ornithine-binding periplasmic protein
DLDIKGPM_01743	CDS	612	rdgB	3.6.1.66	COG0127	dITP/XTP pyrophosphatase
DLDIKGPM_01744	CDS	822				hypothetical protein
DLDIKGPM_01745	tRNA	76				tRNA-Thr(tgt)
DLDIKGPM_01746	CDS	1737	tmcA	2.3.1.193	COG1444	tRNA(Met) cytidine acetyltransferase TmcA
DLDIKGPM_01747	CDS	1176	ydiK		COG0628	Putative transport protein YdiK
DLDIKGPM_01748	CDS	477	greA		COG0782	Transcription elongation factor GreA
DLDIKGPM_01749	CDS	426	gloA	4.4.1.5	COG0346	Lactoylglutathione lyase
DLDIKGPM_01750	CDS	570	grpE			Protein GrpE
DLDIKGPM_01751	CDS	192				hypothetical protein
DLDIKGPM_01752	CDS	1590	rhlE	3.6.4.13		ATP-dependent RNA helicase RhlE
DLDIKGPM_01753	CDS	297	lapA			Lipopolysaccharide assembly protein A
DLDIKGPM_01754	CDS	1152	lapB_2		COG2956	Lipopolysaccharide assembly protein B
DLDIKGPM_01755	CDS	699	pyrF	4.1.1.23	COG0284	Orotidine 5'-phosphate decarboxylase
DLDIKGPM_01756	CDS	252	ibaG		COG5007	Acid stress protein IbaG
DLDIKGPM_01757	CDS	1278	murA	2.5.1.7	COG0766	UDP-N-acetylglucosamine 1-carboxyvinyltransferase
DLDIKGPM_01758	CDS	681	dnaQ	2.7.7.7	COG0847	DNA polymerase III subunit epsilon
DLDIKGPM_01759	CDS	456	rnhA_2	3.1.26.4	COG0328	Ribonuclease HI
DLDIKGPM_01760	CDS	795	thyA	2.1.1.45	COG0207	Thymidylate synthase
DLDIKGPM_01761	CDS	819	lgt	2.5.1.145	COG0682	Phosphatidylglycerol--prolipoprotein diacylglyceryl transferase
DLDIKGPM_01762	CDS	675				hypothetical protein
DLDIKGPM_01763	CDS	888				hypothetical protein
DLDIKGPM_01764	CDS	585				hypothetical protein
DLDIKGPM_01765	CDS	1227	serA	1.1.1.95	COG0111	D-3-phosphoglycerate dehydrogenase
DLDIKGPM_01766	CDS	1401	thrC	4.2.3.1	COG0498	Threonine synthase
DLDIKGPM_01767	CDS	762				hypothetical protein
DLDIKGPM_01768	CDS	1290	gluD	1.4.1.2		NAD-specific glutamate dehydrogenase
DLDIKGPM_01769	CDS	1410	hsrA			putative transport protein HsrA
DLDIKGPM_01770	tRNA	77				tRNA-Pro(tgg)
DLDIKGPM_01771	tRNA	76				tRNA-His(gtg)
DLDIKGPM_01772	tRNA	77				tRNA-Arg(tct)
DLDIKGPM_01773	tRNA	77				tRNA-Pro(tgg)
DLDIKGPM_01774	CDS	1140	cca	2.7.7.72		CCA-adding enzyme
DLDIKGPM_01775	CDS	978	gshB_2	6.3.2.3		Glutathione synthetase
DLDIKGPM_01776	CDS	1575				hypothetical protein
DLDIKGPM_01777	CDS	558				hypothetical protein
DLDIKGPM_01778	CDS	597	ruvA	3.6.4.12	COG0632	Holliday junction ATP-dependent DNA helicase RuvA
DLDIKGPM_01779	CDS	483	ruvC	3.1.22.4	COG0817	Crossover junction endodeoxyribonuclease RuvC
DLDIKGPM_01780	CDS	747	pmpR		COG0217	Transcriptional regulatory protein PmpR
DLDIKGPM_01781	CDS	1317	pepQ	3.4.13.9	COG0006	Xaa-Pro dipeptidase
DLDIKGPM_01782	CDS	3336				hypothetical protein
DLDIKGPM_01783	CDS	810				hypothetical protein
DLDIKGPM_01784	CDS	840	rbn	3.1.-.-	COG1234	Ribonuclease BN
DLDIKGPM_01785	CDS	699	trmD	2.1.1.228	COG0336	tRNA (guanine-N(1)-)-methyltransferase
DLDIKGPM_01786	CDS	513	rimM		COG0806	Ribosome maturation factor RimM
DLDIKGPM_01787	CDS	252	rpsP		COG0228	30S ribosomal protein S16
DLDIKGPM_01788	CDS	927	lpxC	3.5.1.108	COG0774	UDP-3-O-acyl-N-acetylglucosamine deacetylase
DLDIKGPM_01789	CDS	1125	ftsZ		COG0206	Cell division protein FtsZ
DLDIKGPM_01790	CDS	1260	ftsA		COG0849	Cell division protein FtsA
DLDIKGPM_01791	CDS	828	ftsQ			Cell division protein FtsQ
DLDIKGPM_01792	CDS	924	ddl	6.3.2.4		D-alanine--D-alanine ligase
DLDIKGPM_01793	CDS	1428	murC	6.3.2.8	COG0773	UDP-N-acetylmuramate--L-alanine ligase
DLDIKGPM_01794	CDS	1074	murG	2.4.1.227	COG0707	UDP-N-acetylglucosamine--N-acetylmuramyl-(pentapeptide) pyrophosphoryl-undecaprenol N-acetylglucosamine transferase
DLDIKGPM_01795	CDS	1188	ftsW	2.4.1.129	COG0772	putative peptidoglycan glycosyltransferase FtsW
DLDIKGPM_01796	CDS	1377	murD	6.3.2.9	COG0771	UDP-N-acetylmuramoylalanine--D-glutamate ligase
DLDIKGPM_01797	CDS	450				hypothetical protein
DLDIKGPM_01798	CDS	342	hpf		COG1544	Ribosome hibernation promoting factor
DLDIKGPM_01799	CDS	921	yfeX	1.11.1.-	COG2837	Dye-decolorizing peroxidase YfeX
DLDIKGPM_01800	CDS	549				hypothetical protein
DLDIKGPM_01801	CDS	522	pagL	3.1.1.77		Lipid A deacylase PagL
DLDIKGPM_01802	CDS	1113	dhaD	1.1.1.6		Glycerol dehydrogenase
DLDIKGPM_01803	CDS	1158	yqhD	1.1.1.-	COG1979	Alcohol dehydrogenase YqhD
DLDIKGPM_01804	CDS	1842				hypothetical protein
DLDIKGPM_01805	CDS	504	ubiC	4.1.3.40		Chorismate pyruvate-lyase
DLDIKGPM_01806	CDS	1035				hypothetical protein
DLDIKGPM_01807	CDS	2286	btuB_2			Vitamin B12 transporter BtuB
DLDIKGPM_01808	CDS	186				hypothetical protein
DLDIKGPM_01809	CDS	513				hypothetical protein
DLDIKGPM_01810	CDS	417				hypothetical protein
DLDIKGPM_01811	CDS	138	ltxD_2			Leukotoxin export protein LtxD
DLDIKGPM_01812	tRNA	75				tRNA-Glu(ttc)
DLDIKGPM_01813	CDS	432	dksA		COG1734	RNA polymerase-binding transcription factor DksA
DLDIKGPM_01814	CDS	303				hypothetical protein
DLDIKGPM_01815	CDS	1038	pyrC	3.5.2.3	COG0418	Dihydroorotase
DLDIKGPM_01816	CDS	522				hypothetical protein
DLDIKGPM_01817	CDS	723				hypothetical protein
DLDIKGPM_01818	CDS	759	fepC		COG1120	Ferric enterobactin transport ATP-binding protein FepC
DLDIKGPM_01819	CDS	972	hmuU_2		COG0609	Hemin transport system permease protein HmuU
DLDIKGPM_01820	CDS	1875	cirA_3		COG4771	Colicin I receptor
DLDIKGPM_01821	CDS	858	btuF_3		COG0614	Vitamin B12-binding protein
DLDIKGPM_01822	CDS	366				hypothetical protein
DLDIKGPM_01823	CDS	1983				hypothetical protein
DLDIKGPM_01824	CDS	468				hypothetical protein
DLDIKGPM_01825	CDS	1011				hypothetical protein
DLDIKGPM_01826	CDS	633	plsC	2.3.1.-	COG0204	1-acyl-sn-glycerol-3-phosphate acyltransferase
DLDIKGPM_01827	CDS	939				hypothetical protein
DLDIKGPM_01828	CDS	624				hypothetical protein
DLDIKGPM_01829	CDS	594	ynbA		COG0558	Inner membrane protein YnbA
DLDIKGPM_01830	CDS	834	metQ_5		COG1464	D-methionine-binding lipoprotein MetQ
DLDIKGPM_01831	CDS	1047				hypothetical protein
DLDIKGPM_01832	CDS	936				hypothetical protein
DLDIKGPM_01833	CDS	792		1.1.1.390		Sulfoquinovose 1-dehydrogenase
DLDIKGPM_01834	CDS	831		3.1.1.99		6-deoxy-6-sulfogluconolactonase
DLDIKGPM_01835	CDS	894	hisG	2.4.2.17	COG0040	ATP phosphoribosyltransferase
DLDIKGPM_01836	CDS	1296	hisD	1.1.1.23	COG0141	Histidinol dehydrogenase
DLDIKGPM_01837	CDS	1041	hisC	2.6.1.9	COG0079	Histidinol-phosphate aminotransferase
DLDIKGPM_01838	CDS	1089	hisB		COG0131	Histidine biosynthesis bifunctional protein HisB
DLDIKGPM_01839	CDS	735	hisA	5.3.1.16	COG0106	1-(5-phosphoribosyl)-5-[(5-phosphoribosylamino)methylideneamino] imidazole-4-carboxamide isomerase
DLDIKGPM_01840	CDS	1365	hisF	4.3.2.10		Imidazole glycerol phosphate synthase subunit HisF
DLDIKGPM_01841	CDS	543				hypothetical protein
DLDIKGPM_01842	CDS	543	gchK	2.7.13.3	COG0642	Globin-coupled histidine kinase
DLDIKGPM_01843	CDS	1557	rhlB_2	3.6.4.13		ATP-dependent RNA helicase RhlB
DLDIKGPM_01844	CDS	348	mliC			Membrane-bound lysozyme inhibitor of C-type lysozyme
DLDIKGPM_01845	CDS	1497	proP_3			Proline/betaine transporter
DLDIKGPM_01846	CDS	819	mutM	3.2.2.23	COG0266	Formamidopyrimidine-DNA glycosylase
DLDIKGPM_01847	CDS	375				hypothetical protein
DLDIKGPM_01848	CDS	1413	sacA_2	3.2.1.26		Sucrose-6-phosphate hydrolase
DLDIKGPM_01849	CDS	690	mtnN	3.2.2.9	COG0775	5'-methylthioadenosine/S-adenosylhomocysteine nucleosidase
DLDIKGPM_01850	CDS	1512	lysS	6.1.1.6	COG1190	Lysine--tRNA ligase
DLDIKGPM_01851	CDS	1458	guaB	1.1.1.205	COG0516	Inosine-5'-monophosphate dehydrogenase
DLDIKGPM_01852	CDS	1707	recJ	3.1.-.-	COG0608	Single-stranded-DNA-specific exonuclease RecJ
DLDIKGPM_01853	CDS	999				hypothetical protein
DLDIKGPM_01854	CDS	225	tusA		COG0425	Sulfur carrier protein TusA
DLDIKGPM_01855	CDS	447	rimI	2.3.1.266	COG0456	[Ribosomal protein S18]-alanine N-acetyltransferase
DLDIKGPM_01856	CDS	828				hypothetical protein
DLDIKGPM_01857	CDS	837				hypothetical protein
DLDIKGPM_01858	CDS	1500	trpE	4.1.3.27	COG0147	Anthranilate synthase component 1
DLDIKGPM_01859	CDS	3399	recC	3.1.11.5	COG1330	RecBCD enzyme subunit RecC
DLDIKGPM_01860	CDS	480	yfkJ	3.1.3.48	COG0394	Low molecular weight protein-tyrosine-phosphatase YfkJ
DLDIKGPM_01861	CDS	603				hypothetical protein
DLDIKGPM_01862	tRNA	75				tRNA-Lys(ttt)
DLDIKGPM_01863	tRNA	76				tRNA-Lys(ttt)
DLDIKGPM_01864	CDS	948	ansA	3.5.1.1	COG0252	putative L-asparaginase
DLDIKGPM_01865	CDS	120	lppL		COG5567	Lipopeptide
DLDIKGPM_01866	CDS	1242	lysA	4.1.1.20	COG0019	Diaminopimelate decarboxylase
DLDIKGPM_01867	CDS	1023	queA	2.4.99.17	COG0809	S-adenosylmethionine:tRNA ribosyltransferase-isomerase
DLDIKGPM_01868	CDS	744	loiP	3.4.24.-	COG0501	Metalloprotease LoiP
DLDIKGPM_01869	CDS	687	zinT		COG3443	Metal-binding protein ZinT
DLDIKGPM_01870	CDS	1266	proP_4			Proline/betaine transporter
DLDIKGPM_01871	CDS	489	folK	2.7.6.3	COG0801	2-amino-4-hydroxy-6-hydroxymethyldihydropteridine pyrophosphokinase
DLDIKGPM_01872	CDS	204	cspC			Cold shock-like protein CspC
DLDIKGPM_01873	CDS	2604	clpB		COG0542	Chaperone protein ClpB
DLDIKGPM_01874	CDS	696				hypothetical protein
DLDIKGPM_01875	CDS	963	bioB	2.8.1.6	COG0502	Biotin synthase
DLDIKGPM_01876	CDS	1278	aroA	2.5.1.19	COG0128	3-phosphoshikimate 1-carboxyvinyltransferase
DLDIKGPM_01877	CDS	396	xcpT		COG2165	Type II secretion system protein G
DLDIKGPM_01878	CDS	528				hypothetical protein
DLDIKGPM_01879	CDS	1902				hypothetical protein
DLDIKGPM_01880	CDS	2136	pbpC		COG4953	Penicillin-binding protein 1C
DLDIKGPM_01881	CDS	1446	cat	1.11.1.6		Catalase
DLDIKGPM_01882	CDS	4776	yfhM		COG2373	Alpha-2-macroglobulin
DLDIKGPM_01883	CDS	1335	cdr	1.8.1.14		Coenzyme A disulfide reductase
DLDIKGPM_01884	CDS	1416	tcyP_2		COG1823	L-cystine uptake protein TcyP
DLDIKGPM_01885	CDS	675	baeB	3.-.-.-	COG0491	putative polyketide biosynthesis zinc-dependent hydrolase BaeB
DLDIKGPM_01886	CDS	4509				hypothetical protein
DLDIKGPM_01887	CDS	975				hypothetical protein
DLDIKGPM_01888	CDS	285				hypothetical protein
DLDIKGPM_01889	CDS	1002	hgdH	1.1.1.399	COG1052	(R)-2-hydroxyglutarate dehydrogenase
DLDIKGPM_01890	CDS	1053				hypothetical protein
DLDIKGPM_01891	CDS	462				hypothetical protein
DLDIKGPM_01892	CDS	312	ssb_2		COG0629	Single-stranded DNA-binding protein
DLDIKGPM_01893	CDS	1155				hypothetical protein
DLDIKGPM_01894	CDS	2313				hypothetical protein
DLDIKGPM_01895	CDS	1107	yehL		COG0714	putative protein YehL
DLDIKGPM_01896	CDS	1866				hypothetical protein
DLDIKGPM_01897	CDS	1437				hypothetical protein
DLDIKGPM_01898	CDS	1149	cfa	2.1.1.79	COG2230	Cyclopropane-fatty-acyl-phospholipid synthase
DLDIKGPM_01899	tRNA	90				tRNA-Ser(tga)
DLDIKGPM_01900	CDS	570	trpC_2		COG0134	Tryptophan biosynthesis protein TrpCF
DLDIKGPM_01901	CDS	393				hypothetical protein
DLDIKGPM_01902	CDS	1494	mqo	1.1.5.4	COG0579	Malate:quinone oxidoreductase
DLDIKGPM_01903	CDS	420				hypothetical protein
DLDIKGPM_01904	CDS	411				hypothetical protein
DLDIKGPM_01905	CDS	1959	macB	3.6.3.-	COG0577	Macrolide export ATP-binding/permease protein MacB
DLDIKGPM_01906	CDS	1209	macA		COG0845	Macrolide export protein MacA
DLDIKGPM_01907	CDS	1527	lnt	2.3.1.269	COG0815	Apolipoprotein N-acyltransferase
DLDIKGPM_01908	CDS	1149	yfeW	3.4.16.4	COG1680	Putative D-alanyl-D-alanine carboxypeptidase
DLDIKGPM_01909	tRNA	76				tRNA-Phe(gaa)
DLDIKGPM_01910	CDS	849	ligA_2	6.5.1.1		DNA ligase
DLDIKGPM_01911	CDS	393				hypothetical protein
DLDIKGPM_01912	CDS	834	aes	3.1.1.-		Acetyl esterase
DLDIKGPM_01913	CDS	831	glpF		COG0580	Glycerol uptake facilitator protein
DLDIKGPM_01914	CDS	1500	glpK	2.7.1.30	COG0554	Glycerol kinase
DLDIKGPM_01915	CDS	1671	glpD	1.1.5.3		Aerobic glycerol-3-phosphate dehydrogenase
DLDIKGPM_01916	CDS	429	rplM		COG0102	50S ribosomal protein L13
DLDIKGPM_01917	CDS	393	rpsI		COG0103	30S ribosomal protein S9
DLDIKGPM_01918	CDS	1227	pcnB	2.7.7.19	COG0617	Poly(A) polymerase I
DLDIKGPM_01919	CDS	360	speH	4.1.1.50	COG1586	S-adenosylmethionine decarboxylase proenzyme
DLDIKGPM_01920	CDS	138				hypothetical protein
DLDIKGPM_01921	CDS	1542				hypothetical protein
DLDIKGPM_01922	CDS	1005				hypothetical protein
DLDIKGPM_01923	CDS	399				hypothetical protein
DLDIKGPM_01924	CDS	1518	speE	2.5.1.16		Polyamine aminopropyltransferase
DLDIKGPM_01925	CDS	1617				hypothetical protein
DLDIKGPM_01926	CDS	615	tesA_2	3.1.1.1	COG2755	Esterase TesA
DLDIKGPM_01927	CDS	687	lolD_2	3.6.3.-	COG1136	Lipoprotein-releasing system ATP-binding protein LolD
DLDIKGPM_01928	CDS	2496				hypothetical protein
DLDIKGPM_01929	CDS	651				hypothetical protein
DLDIKGPM_01930	CDS	927	tsdA_2	1.8.2.2	COG3258	Thiosulfate dehydrogenase
DLDIKGPM_01931	CDS	1863				hypothetical protein
DLDIKGPM_01932	CDS	732				hypothetical protein
DLDIKGPM_01933	CDS	1590	prfC		COG4108	Peptide chain release factor 3
DLDIKGPM_01934	CDS	933				hypothetical protein
DLDIKGPM_01935	CDS	153				hypothetical protein
DLDIKGPM_01936	tRNA	75				tRNA-Asp(gtc)
DLDIKGPM_01937	tRNA	76				tRNA-Phe(gaa)
DLDIKGPM_01938	tmRNA	354	ssrA			transfer-messenger RNA, SsrA
DLDIKGPM_01939	CDS	1209	intA		COG0582	Prophage integrase IntA
DLDIKGPM_01940	CDS	744				hypothetical protein
DLDIKGPM_01941	CDS	120				hypothetical protein
DLDIKGPM_01942	CDS	309				hypothetical protein
DLDIKGPM_01943	CDS	186				hypothetical protein
DLDIKGPM_01944	CDS	1680	tobZ	6.1.2.2		nebramycin 5' synthase
DLDIKGPM_01945	CDS	1176				hypothetical protein
DLDIKGPM_01946	CDS	1221				hypothetical protein
DLDIKGPM_01947	CDS	567	gmhA_2	5.3.1.28	COG0279	Phosphoheptose isomerase
DLDIKGPM_01948	CDS	585				hypothetical protein
DLDIKGPM_01949	CDS	3840	recD_2	3.1.11.5		RecBCD enzyme subunit RecD
DLDIKGPM_01950	CDS	2151				hypothetical protein
DLDIKGPM_01951	CDS	1116				hypothetical protein
DLDIKGPM_01952	CDS	1851	clpX_2			ATP-dependent Clp protease ATP-binding subunit ClpX
DLDIKGPM_01953	CDS	582	cutD	1.97.1.-		Choline trimethylamine-lyase activating enzyme
DLDIKGPM_01954	CDS	687	gph_2	3.1.3.18		Phosphoglycolate phosphatase
DLDIKGPM_01955	CDS	1851				hypothetical protein
DLDIKGPM_01956	CDS	1347	ltxD_3			Leukotoxin export protein LtxD
DLDIKGPM_01957	CDS	2142	apxIB_2		COG2274	Toxin RTX-I translocation ATP-binding protein
DLDIKGPM_01958	CDS	1563	tnsE			Transposon Tn7 transposition protein TnsE
DLDIKGPM_01959	CDS	1557				hypothetical protein
DLDIKGPM_01960	CDS	1677	tnsC			Transposon Tn7 transposition protein TnsC
DLDIKGPM_01961	CDS	2100	tnsB			Transposon Tn7 transposition protein TnsB
DLDIKGPM_01962	CDS	816	tnsA			Transposon Tn7 transposition protein TnsA
DLDIKGPM_01963	rRNA	1535				16S ribosomal RNA
DLDIKGPM_01964	tRNA	77				tRNA-Ile(gat)
DLDIKGPM_01965	tRNA	76				tRNA-Ala(tgc)
DLDIKGPM_01966	rRNA	2904				23S ribosomal RNA
DLDIKGPM_01967	rRNA	104				5S ribosomal RNA
DLDIKGPM_01968	CDS	1734	prn		COG3468	Pertactin autotransporter
DLDIKGPM_01969	CDS	1473	bicA		COG0659	Bicarbonate transporter BicA
DLDIKGPM_01970	CDS	342	rutC_2	1.-.-.-		Putative aminoacrylate peracid reductase RutC
DLDIKGPM_01971	CDS	366				hypothetical protein
DLDIKGPM_01972	CDS	783				hypothetical protein
DLDIKGPM_01973	CDS	165				hypothetical protein
DLDIKGPM_01974	CDS	561				hypothetical protein
DLDIKGPM_01975	CDS	1575	ftsP			Cell division protein FtsP
DLDIKGPM_01976	CDS	360				hypothetical protein
DLDIKGPM_01977	CDS	198				hypothetical protein
DLDIKGPM_01978	CDS	945				hypothetical protein
DLDIKGPM_01979	CDS	276				hypothetical protein
DLDIKGPM_01980	CDS	225				hypothetical protein
DLDIKGPM_01981	CDS	1035				hypothetical protein
DLDIKGPM_01982	CDS	1203	tetA			Tetracycline resistance protein, class B
DLDIKGPM_01983	CDS	624	tetR			Tetracycline repressor protein class H
DLDIKGPM_01984	CDS	138				hypothetical protein
DLDIKGPM_01985	CDS	246				hypothetical protein
DLDIKGPM_01986	CDS	636				Iron-sulfur cluster carrier protein
DLDIKGPM_01987	CDS	603	hin		COG1961	DNA-invertase hin
DLDIKGPM_01988	CDS	636	soj	3.6.-.-	COG1192	Sporulation initiation inhibitor protein Soj
DLDIKGPM_01989	CDS	192				hypothetical protein
DLDIKGPM_01990	CDS	300				hypothetical protein
DLDIKGPM_01991	CDS	264	yoeB	3.1.-.-	COG4115	Toxin YoeB
DLDIKGPM_01992	CDS	258	yefM		COG2161	Antitoxin YefM
DLDIKGPM_01993	CDS	1386				hypothetical protein
DLDIKGPM_01994	CDS	270				hypothetical protein
DLDIKGPM_01995	CDS	894				hypothetical protein
[truncated: 13 more rows]

[truncated: 23 more sheets: DSM 100917, DSM 105708, DSM 105712, DSM 105838, DSM 105839, DSM 105984, DSM 106597, DSM 108045, DSM 108048, DSM 110179, DSM 110473, DSM 18708T, SH04, BM-Y, Strain 20, ATCC_51249, F6512, F6513, F6514, F6515 …]
