# Supplementary material for: Comparative Genomic Analysis of the Human Pathogen Wohlfahrtiimonas Chitiniclastica Provides Insight Into the Identification of Antimicrobial Resistance Genotypes and Potential Virulence Traits
Source: Front Cell Infect Microbiol. 2022 Jul 7;12:912427. doi: 10.3389/fcimb.2022.912427 (PMC9301364; doi:10.3389/fcimb.2022.912427)
Supplement: Supplementary file 7 [file Table_7.xlsx]

## Sheet: S7
Table S7: Staramr results regarding the W. chitiniclastica genomes analyzed in this study.
Strain	Genotype	Predicted Phenotype
DSM 100374	None	Sensitive
DSM 100375	None	Sensitive
DSM 100676	tet(H)	tetracycline
DSM 100917	tet(H)	tetracycline
DSM 105708	tet(H)	tetracycline
DSM 105712	None	Sensitive
DSM 105838	None	Sensitive
DSM 105839	None	Sensitive
DSM 105984	None	Sensitive
DSM 106597	None	Sensitive
DSM 108045	None	Sensitive
DSM 108048	None	Sensitive
DSM 110179	None	Sensitive
DSM 110473	None	Sensitive
DSM 18708T	None	Sensitive
SH04	None	Sensitive
BM-Y	aac(6')-Ia, ant(2'')-Ia, blaVEB-1, tet(H), tet(H)	gentamicin, kanamycin, ampicillin, ceftriaxone, tetracycline
Strain 20	None	Sensitive
ATCC 51249	None	Sensitive
F6512	tet(H)	tetracycline
F6513	aph(6)-Id, strA, sul2, tet(H)	kanamycin, streptomycin, sulfisoxazole, tetracycline
F6514	aph(6)-Id, strA, sul2, tet(H)	kanamycin, streptomycin, sulfisoxazole, tetracycline
F6515	None	Sensitive
F6516	None	Sensitive
F9188	aph(3')-Ia, aph(6)-Id, strA, sul2, tet(B)	kanamycin, streptomycin, sulfisoxazole, tetracycline
G9145	aph(3')-Ia, catA3, strA, sul2, tet(B)	kanamycin, chloramphenicol, streptomycin, sulfisoxazole, tetracycline
