# Supplementary material for: Comparative Genomic Analysis of the Human Pathogen Wohlfahrtiimonas Chitiniclastica Provides Insight Into the Identification of Antimicrobial Resistance Genotypes and Potential Virulence Traits
Source: Front Cell Infect Microbiol. 2022 Jul 7;12:912427. doi: 10.3389/fcimb.2022.912427 (PMC9301364; doi:10.3389/fcimb.2022.912427)
Supplement: Supplementary file 8 [file Table_8.xlsx]

## Sheet: S8
Table S8: Detailed results regarding the CARD analysis of the W. chitiniclastica genomes analyzed in this study.
Strain	RGI criteria	ARO Term	SNP	Detection	AMR	Drug	Resistance	% Identity of Matching Region	% Length of Reference Sequence
BM-Y	Perfect	tet(H)		protein homolog model	major facilitator superfamily (MFS) antibiotic efflux pump	tetracycline antibiotic	antibiotic efflux	100.0	100.00
BM-Y	Perfect	VEB-1		protein homolog model	VEB beta-lactamase	monobactam, cephalosporin	antibiotic inactivation	100.0	100.00
BM-Y	Perfect	ANT(2'')-Ia		protein homolog model	ANT(2'')	aminoglycoside antibiotic	antibiotic inactivation	100.0	100.00
BM-Y	Strict	AAC(6')-Ia		protein homolog model	AAC(6')	aminoglycoside antibiotic	antibiotic inactivation	99.46	100.00
BM-Y	Strict	tet(D)		protein homolog model	major facilitator superfamily (MFS) antibiotic efflux pump	tetracycline antibiotic	antibiotic efflux	53.54	105.08
DSM 100676	Strict	tet(D)		protein homolog model	major facilitator superfamily (MFS) antibiotic efflux pump	tetracycline antibiotic	antibiotic efflux	53.28	101.52
DSM 100917	Strict	tet(D)		protein homolog model	major facilitator superfamily (MFS) antibiotic efflux pump	tetracycline antibiotic	antibiotic efflux	53.28	101.52
DSM 105708	Strict	tet(D)		protein homolog model	major facilitator superfamily (MFS) antibiotic efflux pump	tetracycline antibiotic	antibiotic efflux	53.28	101.52
F6512	Perfect	tet(H)		protein homolog model	major facilitator superfamily (MFS) antibiotic efflux pump	tetracycline antibiotic	antibiotic efflux	100.0	100.00
F6512	Perfect	tet(H)		protein homolog model	major facilitator superfamily (MFS) antibiotic efflux pump	tetracycline antibiotic	antibiotic efflux	100.0	100.00
F6513	Perfect	tet(H)		protein homolog model	major facilitator superfamily (MFS) antibiotic efflux pump	tetracycline antibiotic	antibiotic efflux	100.0	100.00
F6513	Strict	APH(6)-Id		protein homolog model	APH(6)	aminoglycoside antibiotic	antibiotic inactivation	99.64	100.00
F6513	Strict	APH(3'')-Ib		protein homolog model	APH(3'')	aminoglycoside antibiotic	antibiotic inactivation	99.63	100.00
F6513	Strict	sul2		protein homolog model	sulfonamide resistant sul	sulfonamide antibiotic	antibiotic target replacement	100.0	104.43
F6514	Perfect	tet(H)		protein homolog model	major facilitator superfamily (MFS) antibiotic efflux pump	tetracycline antibiotic	antibiotic efflux	100.0	100.00
F6514	Strict	APH(6)-Id		protein homolog model	APH(6)	aminoglycoside antibiotic	antibiotic inactivation	99.64	100.00
F6514	Strict	APH(3'')-Ib		protein homolog model	APH(3'')	aminoglycoside antibiotic	antibiotic inactivation	99.63	100.00
F6514	Strict	sul2		protein homolog model	sulfonamide resistant sul	sulfonamide antibiotic	antibiotic target replacement	100.0	104.43
F9188	Strict	tet(B)		protein homolog model	major facilitator superfamily (MFS) antibiotic efflux pump	tetracycline antibiotic	antibiotic efflux	99.5	101.50
F9188	Strict	sul2		protein homolog model	sulfonamide resistant sul	sulfonamide antibiotic	antibiotic target replacement	100.0	104.43
F9188	Strict	APH(3'')-Ib		protein homolog model	APH(3'')	aminoglycoside antibiotic	antibiotic inactivation	99.63	100.00
F9188	Strict	APH(6)-Id		protein homolog model	APH(6)	aminoglycoside antibiotic	antibiotic inactivation	99.64	100.00
F9188	Strict	APH(3')-Ia		protein homolog model	APH(3')	aminoglycoside antibiotic	antibiotic inactivation	98.15	100.00
F9188	Strict	tetR		protein overexpression model	major facilitator superfamily (MFS) antibiotic efflux pump	tetracycline antibiotic	antibiotic target alteration, antibiotic efflux	100.0	100.00
G9145	Strict	catIII		protein homolog model	chloramphenicol acetyltransferase (CAT)	phenicol antibiotic	antibiotic inactivation	99.53	100.00
G9145	Strict	APH(3'')-Ib		protein homolog model	APH(3'')	aminoglycoside antibiotic	antibiotic inactivation	99.63	100.00
G9145	Strict	APH(3')-Ia		protein homolog model	APH(3')	aminoglycoside antibiotic	antibiotic inactivation	98.15	100.00
G9145	Strict	tet(B)		protein homolog model	major facilitator superfamily (MFS) antibiotic efflux pump	tetracycline antibiotic	antibiotic efflux	99.5	100.00
G9145	Strict	tetR		protein overexpression model	major facilitator superfamily (MFS) antibiotic efflux pump	tetracycline antibiotic	antibiotic target alteration, antibiotic efflux	100.0	99.52
